# Supplementary material for: Response of commodity markets to global warming attention
Source: Research Square preprint supplement (doi:10.21203/rs.3.rs-4567325/v1), 2024-06-24
Supplement: Supplementary file 1 [file day_return.xlsx]

## Sheet: Sheet3
-1.97753	-1.89695	-2.03053	0	4.25596	-1.47436	-0.238949	-0.894861	-2.36818	-1.8928	-2.43133	-1.46798	-1.8707	0.391262	-0.110451	-1.45794	-0.262001	-2.3828	-1.64457	-0.114025	0.455483	1.62312	-3.41465
-1.07295	-0.868627	1.69496	0.966976	-0.98523	1.94713	0	-5.86135	-3.34177	2.01772	1.01286	1.68002	1.59429	0.203178	0.330989	-0.133601	-0.392989	-0.914408	-3.90167	-1.78422	-0.0216427	-1.62312	-2.91447
-2.5412	0.295559	-3.07191	1.13218	-1.24535	2.7125	1.18907	6.45882	3.51279	-3.42891	-2.16049	0.0244369	-1.19333	0.170351	0.590296	0.798939	-1.01167	-0.233568	1.57898	0.521287	0.216216	-0.750282	0.685404
-0.562826	-0.586786	-1.04531	-2.40373	-2.79561	0.319033	-2.8779	-1.04791	-5.73193	-2.75066	-0.340059	-0.805483	-0.280505	0.412505	-0.136968	-0.932718	-0.607712	0.63447	-1.57898	0.230814	-0.389527	-1.497	-0.82305
0.62135	0.46763	2.0798	-0.335358	-1.8206	0.276723	1.2092	1.27105	5.04605	0	1.31974	1.14697	2.57491	0.11294	-0.0411269	0.667114	-1.10328	-0.537326	-0.132714	0.402647	0.0216802	-1.35207	0.240757
0.941864	1.45124	0	1.92961	1.8206	0.141512	-1.2092	-1.72353	1.12918	-4.0656	2.07382	0.784254	2.01323	0.112812	0.451468	0.530505	2.0371	0.571449	3.26613	0.914292	0.62669	3.39714	1.63547
1.63202	2.46764	3.86928	2.88683	1.02565	-0.75013	0	4.00053	2.78495	4.0656	0.808924	-0.759907	-0.0383362	0.297536	0.408664	1.9647	1.80837	0.0957709	3.16282	1.97134	-0.47506	4.35712	-0.30462
1.13657	-1.09762	1.96085	0.340885	3.26252	-2.98976	3.58461	0.145138	-1.6011	1.58106	-0.502075	-0.471776	0.0383362	0.64031	1.12201	0.129618	-0.758393	0.403839	1.97294	1.71417	-0.651468	-0.973718	-0.441652
0.0370307	-0.982485	0.966191	-2.83309	0.492612	0.279957	2.09067	0.434154	0.201545	-1.31581	0.153072	2.07374	1.06749	1.06342	0.482769	-0.129618	0.412265	-1.82805	-2.9742	-0.715271	-1.05126	1.26399	-3.88803
2.047	0.127152	0	-1.89963	0	0	0	0	-3.10129	0	0	-0.560584	0	0	0	-0.389864	-0.142415	0.0183881	-0.630917	-0.442723	0.833155	-0.154709	0
0	0.370361	1.43201	0	-1.23611	1.28884	0	-0.797395	0	3.5137	-0.164015	-0.358012	0.18943	0.212909	0	1.67854	0.7795	0.554465	1.88093	1.15799	0.435731	1.02052	2.48221
0.150759	-1.05891	-3.21055	2.95162	1.48151	-0.18483	-1.62228	-0.291545	1.23841	0	-0.581684	0.108746	0.415487	0.314589	1.42129	-1.54842	-1.36162	0.325669	2.33283	1.14474	-1.97591	-1.66123	-0.103645
2.1875	-0.276753	1.93867	2.49461	-2.73309	0.502461	0.466201	0.218739	-0.273879	1.27067	-2.55295	-2.42841	-1.25168	-0.0628387	0.421164	-0.914441	-2.36298	-1.69613	-2.33283	-1.97051	0.662986	0.388803	-4.52534
6.48959	2.87837	0.637961	2.38579	-1.26744	-1.5201	0	-0.218739	0.102793	3.59617	-0.384659	1.66875	1.17626	0.290299	0.432476	0.392928	0.97199	-0.319347	1.11181	0.441258	0.220022	1.50205	-0.689533
-4.17871	-0.504913	-0.318472	2.71221	1.01524	-1.47654	-0.232829	-0.146092	2.36898	1.45105	-1.69186	-2.16905	-1.44379	-0.408228	0.326392	-1.31581	0.897174	0.177623	0.245399	0.274801	0.0329616	-0.0382336	-0.69432
3.25193	-2.066	-1.76996	3.28999	0	-0.58827	-1.40847	-2.21739	0.0668673	0	-1.93231	-2.72274	-0.806921	-0.196858	0.545952	-0.53121	-3.01792	-1.56331	-3.74576	-1.93966	-3.13554	-0.960622	-1.8879
0.686682	2.19622	2.40589	-0.441129	-1.27067	-2.33098	-1.18907	0.818762	-1.51544	2.13785	1.2498	4.10588	3.18934	-0.545348	0.72333	0.663572	0.833361	0.0422281	0.507615	0.223589	1.55216	2.29018	0.112045
0.240096	-0.130221	-0.955421	2.74464	1.77444	-0.242285	0.477328	1.03246	3.43539	-1.42014	-1.99303	-2.1404	-0.825521	-0.420919	0.794774	-0.530505	1.20278	0.104739	2.99274	0.889389	1.10989	-0.0188697	0.446928
0.0285025	2.70454	-1.12632	1.60013	0.501254	0.212563	0.237812	-0.146843	2.36525	-2.04703	4.28803	2.56874	1.16128	-0.0796178	1.01627	1.1897	0.979161	0.13171	-0.987662	-1.281	1.76144	0.470678	3.79192
-2.16026	0.472055	2.55605	-2.72606	-1.00503	1.61968	0	1.31389	-0.256493	1.68882	3.17097	0.410294	1.40535	-0.103598	1.10609	1.43512	2.30955	0.196115	0	-0.168303	1.49618	2.70537	0.748533
2.37978	1.64203	0	2.38934	2.49389	0.533424	0	0	0.352508	0	-1.60642	1.06056	0.76825	-0.0797639	1.14344	-0.129618	2.052	0.0030026	1.96567	1.72562	0.554018	2.33094	0.283688
-0.827767	0.367078	0	2.32748	0	0.0592094	0	0	0.191755	0	0.267678	-0.486541	1.01524	0.047866	0.714201	-0.25974	-0.0652168	0.0975354	-0.365631	0.988476	-1.28317	0.0178587	0.176897
1.57981	0.413135	0.314961	2.41164	4.33803	1.14712	0	1.58277	3.91347	2.13026	-0.401786	-0.149251	-0.796817	-0.0159528	0.306279	-0.914441	-0.19842	-0.0112492	-1.3522	-0.109349	-0.658643	-0.178731	0.844778
-0.326989	-1.07197	2.79088	-2.21656	0.470589	0.146698	1.18065	-0.142857	-7.29042	0.583773	-1.74859	-2.62581	-1.68688	-0.271587	0.366301	0.131148	1.20205	1.10016	0.616905	0.545555	1.54792	1.42098	1.53046
-2.52751	0.191415	-0.613499	-2.46637	0	-0.43971	0	-0.4298	-0.132188	0	-1.80289	0.899383	-0.519096	0.701422	0.837434	-0.262467	-0.106873	0.251889	0.857323	0.380125	-1.20186	-0.176523	1.13267
-1.08545	-0.633065	0.30722	4.03749	1.16687	-0.587578	0	0.715311	1.01991	2.4153	-0.522801	1.83133	1.10907	-0.230607	1.24912	-0.52701	0.166474	1.06936	0.365186	0.16247	1.05242	0.282287	2.82657
0.814136	1.92506	3.17008	0.526223	-2.58534	-1.75633	0	1.13396	-4.17772	1.69018	-0.303313	1.38165	1.20593	0.52406	0.891219	-0.79576	-1.36982	-0.173646	1.44755	0.539667	0.628297	-0.0176196	0.099486
0.694042	0.742904	0.148478	3.07735	1.41846	-1.29854	0	-1.27661	0.883458	-2.83305	-0.175408	-1.80597	-1.27949	0.197793	1.11759	1.05961	0.165975	-0.167337	-1.56913	-1.46384	0.0424538	-1.86755	0.0993871
2.51699	-0.827889	1.17995	3.96855	-1.18065	-0.0309715	0	-1.22084	1.54417	0.114877	-1.23655	-0.417995	-0.92405	0.473112	0.466854	0.394478	0.258473	0.368065	0	-0.10929	-0.692118	1.60288	-0.797877
0	2.3158	-1.32843	1.34164	0	1.38957	-1.89579	-0.870833	-2.53007	-0.114877	-0.868795	1.14832	1.47441	0.220022	-0.268175	0.523561	2.02689	-0.11863	0.243013	0.0546597	0.224132	2.08068	1.95015
0	0.0461425	-1.19583	-1.50852	-1.67669	-0.209848	-2.66682	-2.50936	-1.61877	-4.58634	-0.635532	0.00402018	-0.697635	0.344774	-0.538517	0.780238	-1.50695	0.628161	2.51661	0.653597	-0.427351	-0.520473	0.489797
-0.545111	0.0737837	0.450113	2.6211	-1.45988	2.87495	-0.987662	-0.149589	-1.43384	0.240385	0.802736	1.30204	1.78935	0.491593	-0.825087	0.12945	-1.8038	-0.120943	-0.593474	-0.762946	0	-0.593163	0.260247
0.821485	1.53701	3.09531	3.72621	-0.245399	0.495213	1.96567	2.80461	3.29148	1.54857	1.48063	-0.00396818	-1.42157	0.241011	-1.49052	-0.388853	-0.343298	0.726367	-0.119119	0.32769	-0.128562	-0.297906	1.5794
0.360863	1.25408	-0.436364	3.59234	2.66682	1.18505	-3.21412	-2.65502	-1.33816	-3.3657	-0.0235183	0.790518	-0.478382	0.0465802	-0.409294	0.647251	0.536044	0.265981	0.948999	0.108992	0.342466	2.29018	2.12
0.398703	0.349056	0	-3.59234	0	0	0	0	-1.21635	0	0	0	0	0	0	0.128949	-0.538592	1.41907	1.29034	0.597341	1.18948	0.51326	0
0	0.756568	-5.08331	0	-1.20338	1.79328	-3.58095	-5.37351	0	-6.69865	8.58248	2.33474	2.94406	-0.0155243	0.120555	-0.516797	-2.455	0.0882048	-2.59755	-1.41769	-1.44622	-2.24341	3.23453
0	-1.87515	2.12451	-3.72621	-4.9638	-1.33541	2.31671	1.64259	-0.10495	0.910872	3.59358	4.66634	4.13949	-0.147602	0.396802	-0.519482	-1.63187	0.376838	-3.28297	-1.4938	1.27716	0.104657	2.18866
4.35804	-1.62131	-0.451468	0	-3.36384	3.208	0	-0.0776096	-3.63547	-2.09432	-0.218898	-1.44941	-1.66324	-0.0233254	0.323489	0.130124	0.877152	0.115393	-4.94084	-1.23389	-0.817631	-4.18322	-2.03722
-1.30081	1.42687	0	-6.56745	-4.02739	-0.166403	-0.766287	0	1.33407	0	0.717445	8.23606	2.99454	0.178689	0.370128	0.25974	2.71942	-0.331671	1.92932	1.06653	0.0106615	2.45995	-0.272769
1.41533	1.37555	6.14228	4.05764	2.43584	-3.15612	2.28147	3.05834	3.69175	5.90672	0.599113	-0.792015	-0.714653	-0.1165	0.404377	0	1.15549	0.449757	0.634923	0.72323	0.446762	2.79836	2.66523
0	-1.5341	-0.141945	3.81913	0.533335	0.213869	0	0.899556	2.62321	-0.750942	2.57219	-1.73317	3.39129	0.0854469	-0.0237417	-1.83251	-0.314274	0.546189	2.74674	1.32161	1.28653	-0.744399	2.0185
0.00962907	-0.0861737	-1.43064	1.27655	2.36542	0.44235	-0.754721	1.40795	-8.78065	0.125549	2.61531	0.259969	0.625311	-0.10099	-0.0475003	-0.662693	0.283904	1.09533	1.10228	0.979866	-0.209776	-0.610024	1.2376
1.10202	1.12797	0	3.6328	0	-1.0924	0	0	3.32161	0	-0.342818	-0.143953	-0.328623	-0.186712	0.189866	2.10534	0.273003	-1.25007	-0.488401	-0.271223	-0.0525127	0.904984	-1.38251
1.48459	0.0314007	0.431345	2.59088	1.0336	-1.04018	1.25472	1.60587	0.566574	0.99876	2.34666	1.42683	1.30806	-0.148062	0.0592593	0.389864	-0.171804	0.532159	-0.737104	-0.708643	0.209886	-0.208117	2.35035
-2.3956	2.37996	-1.29966	3.4173	-1.0336	0.661894	0	-1.31197	-2.03324	-4.05632	0.982317	-1.68717	-1.27515	0.0233927	0.0710648	-0.520157	-4.1037	0.459668	-0.123381	0.545555	-0.0734099	-4.70989	2.0469
0.74217	1.7539	-1.90761	0.59336	-1.0444	1.17467	0	-0.958356	0.610744	-3.42139	-0.294635	-2.37771	-1.22498	0.0935162	0.401749	0.520157	0.305151	-0.408567	-3.64591	-1.64568	0.439653	-2.39422	-0.808142
-1.04108	2.86764	-0.594355	-3.39674	-2.92964	-1.71423	-4.59264	-2.47482	1.77498	-3.5426	-0.639773	3.33482	2.07688	0.25672	0.740178	1.41664	-2.78047	-0.011198	2.40366	0.165792	-0.408185	-2.54851	0.502373
-2.16506	-3.87107	-2.7192	-1.57202	-2.18588	-2.06293	0	0.378932	-0.990107	-2.24413	-1.60297	-0.339025	-1.21452	0.41867	0.478777	0.637351	-0.911564	-1.48783	-3.95208	-1.839	-0.367744	-0.383142	-2.79482
0	-2.56244	-2.95282	-1.85729	-3.0858	-1.28336	-0.523561	-1.60125	-5.25285	-2.8779	-1.55985	-1.01342	-0.463424	0.231839	-0.431966	-0.254453	-0.0109022	0.16255	-1.96986	-0.0562588	0	-0.384616	2.51603
-3.90405	-0.379795	0.314961	2.0076	-1.43474	0.391147	0.784318	-7.58241	0.336512	2.16615	0.0593061	-0.656438	1.31841	0.154262	-0.551418	-0.255102	0.00817673	1.21673	-0.265604	-0.847702	0.503991	-0.482859	0.69551
1.28225	-3.06835	-5.82689	-3.56744	-2.04387	-1.08572	-3.17487	2.29518	-3.18571	-7.8734	-4.00195	-6.2997	-3.56645	0.061638	-0.329956	-2.45649	-0.680954	-2.14089	-7.1656	-2.93715	-0.672554	-4.43374	-4.76957
-4.51878	1.72986	-2.36099	-3.69943	-6.0809	-1.12231	0	1.68746	-8.18748	1.22889	0.778613	1.44543	1.41512	-0.509654	-0.236351	-1.71621	1.60604	0.236661	2.6781	0.87286	-0.0843882	0.986817	0.926201
-0.750901	2.56206	5.31687	-3.17244	-2.86188	-0.340672	0.536194	3.75337	0.500627	7.63954	3.48978	3.37309	1.88904	-0.271329	-0.414963	1.05961	3.25703	0.234677	-0.978345	-1.69446	0.463256	3.83339	-1.1591
2.10875	0.96819	5.66189	3.81642	6.25204	-0.744478	6.21962	1.97575	3.79715	1.82205	-0.404879	0.375059	-1.05612	0.472411	-0.333215	-0.926545	-0.54516	1.10462	2.08486	1.34623	0.419288	3.13267	2.24793
-5.29793	0.476243	0.457667	3.67611	5.02321	-3.11513	-0.756624	0.0752163	3.50361	-0.278164	1.27816	1.17019	0.298162	0	0.0119197	0.530505	-1.29082	0.935602	2.17696	1.21354	-0.629593	0	2.83767
2.48566	-1.35603	0.455582	-0.0567347	-0.578036	-0.0951491	0	0.300301	-0.737724	1.10804	2.09781	0.344503	1.02025	0.0309	0.440032	0.921666	0.974945	-0.447772	-0.539812	-0.287604	0.629593	-1.50662	0.580032
2.21232	-1.37019	-0.76046	3.54773	-2.34615	0.540584	-2.30484	-1.05502	-0.625491	-0.414079	0.648424	0.46691	-0.657033	0.654377	0.414472	-0.525625	2.45833	0.897024	0	0.459771	0	1.7866	1.80136
-0.451281	-0.931537	3.3036	-2.00676	-0.59524	1.22994	0	0.378072	-2.26066	3.39938	-0.161712	1.26242	0.460376	0.711094	0.14171	1.43887	-0.141583	0.471454	2.53855	1.02682	0.198548	1.38827	2.95824
-1.5873	1.51215	-1.78842	3.50913	2.65111	0.438051	0	0.301432	4.12551	-0.536194	-0.142905	0.825935	0	0.205503	0.635222	2.18377	-0.332865	-0.786066	-0.529102	-0.569153	-0.428938	-0.552997	-1.42822
1.15546	-1.52572	-2.58963	-2.13676	0	-0.407248	-1.3038	-0.679504	-2.65226	-1.89965	-1.29542	-0.906115	-1.15494	0.553514	0.980171	0.759497	-1.58394	-1.13791	-1.60431	-1.26366	-1.06457	-3.11645	-0.829214
0.212226	-1.46214	0.308167	-3.57071	0	-0.344875	0.262123	0.98003	-0.0790826	3.23478	0.769679	1.99572	0.793393	0.264301	1.25773	-0.126183	0.508134	0.116277	0.13468	0.863315	1.46218	1.43887	-0.16129
-5.67583	0.977132	-1.39429	-1.38575	0.579712	0.251337	0	0.747388	1.21881	-1.33513	-0.518883	1.22317	-0.0658762	0.96068	0.935866	0.879955	-2.17096	-0.356305	1.86672	0.855925	-0.628538	-2.16615	0.456315
-2.34755	-0.122758	4.87159	-0.565018	-0.289436	0.624498	1.04168	2.7902	-0.587891	4.33993	2.2764	2.20765	2.05453	0.409974	0.656705	0.748133	0.529912	1.56599	1.18189	0.735922	0	0.249401	0.906431
-1.18368	-2.06847	5.91376	3.40463	4.80998	0.124651	-2.09432	-1.09211	1.36641	-0.51613	1.27259	1.72909	0.867754	0.645092	0.988217	1.23458	-0.746411	-0.860258	0.780238	0	-0.421231	-1.91514	0.106101
2.29106	-1.30898	3.30609	-2.39827	2.18588	0.620937	0	-0.734757	-8.7893	4.05632	0.547083	0.0454427	0.828558	0.508682	0.779167	-0.122775	-0.343081	0.657566	1.66992	0.450198	0	-0.39139	1.7346
-0.103936	4.05302	1.07818	0	2.92964	0.185532	-2.68113	-0.814518	9.7924	-2.13442	-0.296351	1.00098	0.538061	0.0294096	0.56388	-0.616145	0.623639	0.885057	-0.63898	0.336323	0.252951	-0.373245	1.65378
-1.22949	-0.671022	-0.537636	2.84766	1.56253	-0.993505	0.271371	0.2228	-2.4875	0	0.51804	-0.16399	0.157704	-0.0147037	0.363177	-0.74442	2.2844	0.568538	1.71596	1.1683	2.49493	3.95537	1.24795
0.891684	2.30247	-0.540542	3.50456	0	0.467479	-1.36428	-0.894194	0.627699	-0.892294	1.31991	-0.222297	0.40887	0.0441047	0.219467	-1.50567	0.670603	0.186053	-1.9727	-1.56079	-2.07476	1.39022	0.0506073
0	0.208727	1.21214	0.0541032	-4.7628	1.0493	1.63491	2.07415	-1.97479	3.27485	2.2064	2.65121	3.90879	0.0514309	0.415665	-0.506972	2.10199	0.870726	0	1.28386	2.8724	2.94139	2.17699
-0.908083	0.00887233	1.19762	-2.61541	5.27827	1.4633	-1.36057	-1.7006	0.437812	-0.746272	-2.49821	-2.59317	-2.44436	-0.855715	0.522592	0.253807	-0.192972	-0.0544114	2.16156	-0.0554785	-0.992894	0.379713	1.88801
0.974697	-0.422307	-2.68113	0	2.03569	-0.728439	-1.93644	-2.72126	-1.68206	-5.51776	-3.48467	-0.835118	-2.15734	-0.16312	0.530678	-1.66138	-2.39463	-1.3631	-1.52094	-0.947874	-1.09641	-3.69493	-3.00812
1.23099	2.52053	-0.135962	-1.64889	-2.80989	-0.366756	0	0.153139	-2.66028	-0.661816	0.800569	2.20531	0.787034	-0.289823	0	0.385853	-1.20995	0.644137	-1.28536	0.0560067	-0.584126	-1.68071	1.26852
0.0894806	0.442095	-0.408999	-1.24956	-1.04168	1.69908	1.38698	-0.0765404	-2.22278	-0.933963	1.05446	-0.0190791	-0.0627353	-0.484913	1.31983	0.384369	-1.04888	0.519428	-1.3021	-0.786963	0.0104608	-1.7482	2.17586
1.65357	1.38721	-1.51414	-1.08137	-1.31754	0.718833	0.82305	0.0765404	-0.0848536	0.401338	1.32782	1.60574	0.968001	-0.254586	0.181053	-0.512822	-0.0532666	1.14749	1.17265	0.842938	1.65979	1.36659	3.51664
1.09445	-0.830875	1.65066	-5.45079	0.264901	-0.448797	0	1.06546	-0.724178	4.05549	-2.28851	-1.06973	-1.2508	-0.18761	0.201967	-0.515465	-1.94489	0.549744	-3.02456	-0.50491	-1.4508	-2.51659	-0.116809
0	2.04332	-0.547197	0.415134	1.31408	0.92586	-0.273598	-0.30326	-0.81563	1.02042	0.448851	0.0853688	-1.29851	-0.00751174	0.328651	0.900328	1.23373	-0.0180974	-1.61511	0.112423	4.29075	-0.807012	1.87571
-2.58145	1.79568	-1.93912	-3.94328	1.55444	1.32915	0.818558	-0.304183	3.6814	-0.636539	3.35781	1.22192	2.11331	-0.542333	0.527817	0.383387	2.51696	0.814484	2.94139	1.33931	-0.803217	4.25596	3.93619
0.52668	-0.464615	0.27933	-2.36632	-1.55444	-1.50778	0	3.36984	0.868671	1.89759	0.790802	1.17632	-0.626176	-0.105796	-0.0842638	-0.127632	1.31261	0.00398931	0.787406	0.442479	0.993037	1.87623	1.14036
0	0	0	0.276138	0	0	0	0	-0.785615	0	0	0	0	0	0	0	0	0	0	0	0	0	0
0	-1.40272	3.69652	0	0.520835	-0.567257	2.41622	0.733679	-0.833686	3.20619	-0.0358102	0.335762	-0.377596	0.241655	-0.337767	0	0	0	0	0	0	0	3.82894
-0.664713	1.72652	0.402415	-0.682918	2.05663	-0.962547	0.529102	-0.366167	-0.545647	-1.22102	0.0358102	0.0983586	1.03498	-0.0528123	-0.434438	-3.50913	-1.67695	-0.254304	-1.44835	0	-0.791627	-0.933714	-5.74424
0.402678	-0.0829256	-1.89195	-3.60876	-2.05663	0.241771	-0.264201	-0.367512	-0.845314	-4.652	0.526716	2.28101	0.993488	0.180955	-0.138144	0.921666	-2.37556	0.449585	0	0	-0.413328	-0.0750751	0.576243
1.86919	0	-3.89479	-4.38172	-5.3346	0.270768	-2.95323	-2.15862	-1.88523	-4.74397	0.0623081	-0.303755	-0.309406	0.480951	0.169996	-0.657465	-0.0107567	1.89371	3.0048	1.26133	0.995133	0.822742	6.99795
0	0	4.16727	-0.861132	-8.87564	1.49291	1.3532	3.11136	-1.56934	3.70903	0.894722	-0.743723	1.10941	-1.22192	-0.0318522	0	0	0	0	0	0	0	0.0412031
0	2.58372	-3.31981	3.26982	1.19049	0.379101	2.39055	-0.0729661	-1.7731	1.80417	-0.317993	-2.00764	-0.985533	0.00758869	-0.212608	0	0	0	0	0	0	0	-4.18524
3.30507	0.0969658	-1.41645	-2.24246	-2.69881	1.694	0	-2.13951	0.357143	-2.45649	-2.17332	0.154684	-1.65396	-0.0911023	-0.747707	-0.927773	0.284663	0.435954	-0.257732	1.24562	0.020002	1.6804	-6.01952
-0.295656	-3.17969	0.852278	1.92338	0.30349	-0.420817	-1.05542	-0.898882	-2.89351	-2.78717	-1.65007	-0.359234	-1.77782	-0.487286	-0.915511	-0.936462	-2.46236	-1.03352	-1.95446	-0.919174	-1.00503	-5.57268	-9.89436
-2.62357	-1.45289	-3.0153	-3.83238	0.604231	-0.824276	-0.798939	-2.20625	-2.69658	-3.98131	-8.53498	-6.08535	-8.3117	-0.781553	-0.270871	-1.08109	-3.3766	-2.79574	-4.16447	-2.14117	-1.42424	-5.165	-8.23748
-3.56527	0.261902	-3.41026	-4.5423	-3.6814	-1.61152	-1.61729	0.537017	-1.56736	4.51822	-3.06997	1.30044	-0.873979	-0.501254	-0.130279	-0.135962	0.161916	0.708804	-1.10346	-0.724035	-0.864381	0.325667	-2.35175
0.51515	-0.253443	3.41026	-0.882872	2.77368	-1.04055	0.542007	0.610223	1.70863	4.06613	3.49952	5.6898	3.82344	-0.418346	-0.304646	0.407333	0.664793	0.890931	0.691088	0.111732	0.247729	-0.939166	4.70289
-0.00160873	-1.27266	0	-0.0756456	4.74867	1.77827	0	0.379507	3.96731	0.895719	3.01432	1.62541	1.10907	0.0465694	-0.0654022	-0.816331	0.242185	0.544752	0.959569	0.111607	1.83866	1.92997	2.58385
0.776256	-2.76215	-3.86378	3.33533	0.578036	0.388608	-0.814116	-0.455582	-3.68535	-3.63205	-5.4766	-5.78757	-2.9853	0.147327	0.0654022	2.16225	-2.37375	-0.420202	-1.0974	0	-1.0173	-1.21459	-6.09012
0.397965	-0.176297	0.604231	-0.721205	-2.92418	2.36429	1.62166	1.05981	1.44424	-3.63187	0.661883	-2.83467	-0.275862	0.22445	0.348091	-2.02573	0.370866	-1.16943	-1.38891	-1.85764	0.367422	0	-6.19048
-2.33016	-0.672777	0.300752	-4.10426	1.47278	2.57456	0	-1.13595	-0.185185	-1.24054	0.687775	0.532738	1.09891	0.0541021	0.487462	0.27248	0.660691	0.884994	0.418703	0.792307	-0.982809	-0.612872	1.31562
0	-2.24103	2.22726	0.577895	-0.586512	-0.731123	-2.16811	-0.305111	0	1.37743	-2.34561	-5.54274	-2.62991	-0.0309119	0.775031	-0.682597	0.525995	-0.289245	-0.698815	-0.792307	-1.03414	-0.184597	0.0870954
-0.999678	0.570628	3.46355	4.08109	0.878483	-0.485406	0.818558	1.1394	0.876592	3.62699	-0.527651	-0.361187	-0.245743	-0.154703	0.907302	-3.34293	-0.449056	-1.83394	0	0	-1.88883	-0.845279	-3.06447
-0.775255	2.13121	4.16727	2.80616	2.59007	-0.474722	0	2.90307	3.12031	7.1277	3.18524	-0.425369	1.25744	-0.46555	0.360628	2.93112	2.99133	1.51714	2.35631	-0.39852	1.68071	2.15062	5.35947
0.471678	-1.34852	0.271739	3.06322	2.8013	1.90522	2.41622	0.0733407	-3.07438	-1.48518	-1.54932	-0.771663	-0.0694444	-0.436478	0.790935	-1.10651	-1.28826	-0.583533	0.818558	0.73885	-1.8928	-4.64525	0
-0.163034	-2.33001	1.48151	-2.68806	-0.832182	-1.60049	-0.265604	0.2197	2.22484	0.621506	1.17684	0.782145	0.726773	-0.878713	0.80557	-1.11889	1.36287	1.29642	-0.272109	0.0566091	0	-0.063701	-0.740112
-2.06978	0.863078	-0.670693	-0.0193705	0	0.312777	0	-0.513386	-3.56528	-0.996272	-2.13045	-0.546507	-2.19636	-0.711747	-0.375823	-2.99808	-3.07164	0.280828	-1.50998	-0.966741	0	-4.98634	-0.314781
0	-0.141053	-2.86709	-0.934222	-0.839166	0.820744	-0.801072	-0.0735565	1.93554	-2.66344	2.11028	2.1202	2.16187	-0.0952835	-0.966902	0	0.828374	0.890241	2.18887	0.512968	0.656018	2.20808	3.52
-1.5818	1.35675	1.64839	-0.00651827	-0.281294	1.34367	0	0.440529	2.61276	1.90967	1.65078	1.00263	2.41961	-0.294364	-0.656921	0.578036	2.34543	0.214786	0.674311	0.849142	0.609822	2.18175	4.41149
2.87402	-0.202343	0.54348	1.36603	2.50361	-0.111367	0.534761	0.58437	0.532152	2.1211	-0.597136	1.03312	0.0673174	-0.439175	-0.308757	0.143989	-0.542367	-0.681306	1.46767	0.281452	0.188501	-2.48796	-1.97867
1.22938	-0.387842	1.74618	-3.26784	2.44246	0.305475	0	0.0728067	1.53613	0.615387	0.398486	1.23913	0.335909	-1.81698	-0.481001	0.143781	1.95904	0.951751	0.26455	0.392707	-0.125628	1.15432	1.79317
0	0.0542079	0	1.10338	0	0	-1.88431	0	0.347826	0	0	0	0	0	0	0	0	0	0	0	0	0	0
-1.24303	0.248078	-1.3405	0	1.33158	-1.11613	0.542007	-0.291545	0.303359	-4.51771	2.08587	-1.66125	2.22195	0.957023	-1.2073	0.573067	0.152253	0.339957	2.60771	2.3244	0.104701	2.16352	1.57898
1.12294	-2.39349	1.60646	3.86671	0.790518	-0.224925	1.07528	0.799713	-2.89748	-3.12933	-2.36464	-1.35602	-1.68683	0.201589	-0.827621	-2.02027	-1.22731	0.467018	0.385357	0	-0.629857	-1.47297	-0.261438
-1.60685	1.08759	0.925321	1.43725	-0.790518	0.785035	0.798939	1.43784	4.57098	2.09706	0.109611	-0.402152	1.29248	0.152936	0.098366	0.291121	-2.03374	-1.2175	-0.643089	-0.273898	-0.400971	-2.9462	-5.93166
-1.68513	2.35008	-1.59155	2.01105	-0.796817	-0.587705	0	0.498399	1.18445	0.775198	-0.129553	0.672779	0.558202	-0.00804343	0.316301	-0.583092	2.00899	0.765437	-0.647251	-0.881548	-0.190496	0.991744	-0.306023
-0.501381	-3.30856	-3.12313	-1.58821	-0.534761	2.05555	-1.60431	-2.29895	0	-1.81823	-1.21396	-1.6592	-1.55093	-0.306131	-0.436539	1.30721	0.384394	0.891144	2.43758	0.661889	0.780842	-0.748408	3.31583
0	1.36387	0.687288	-3.79408	-1.62166	-0.911831	1.33871	0.65194	0.126077	-1.31928	0.110971	1.37485	2.04089	-0.104945	-0.878837	-0.578873	0.0410976	-0.837204	1.88329	0.274499	0.272909	-0.022097	-0.866275
0.471777	0	3.76389	-4.61641	-0.272851	-1.22853	1.05821	0.575956	1.74859	1.84216	1.59043	-1.15596	0.325309	0.258127	-0.132494	0.145033	-1.22924	-0.168415	-0.623832	-0.32949	0.209424	0.352967	-0.190502
0.633034	1.06706	2.60431	-2.42523	3.22609	1.06175	0	-0.503779	0.123737	-0.391901	1.16418	1.53605	1.41892	0.610395	0.0773096	1.15275	0.276932	0.219729	1.36733	0.712527	-0.840341	2.15671	2.28905
2.6846	-0.631629	0.384863	4.06533	4.39916	0.527649	0	-0.578873	2.36264	-0.393443	-2.63369	-0.909831	-1.12704	-0.481581	0.429634	-1.73415	-1.29709	-0.364311	0	-0.10929	-0.634923	-1.52012	-2.3708
-3.32682	0.546141	-0.51348	-0.67955	0.252845	-0.666351	-1.05821	-0.145243	-0.484262	-2.52841	-2.13749	-0.08281	-0.19449	0.152752	0.48251	0	-0.305841	-0.582395	-0.495051	-0.76839	0	-2.54861	-3.77823
1.86466	-0.514465	-3.67014	0.633061	2.49389	1.62878	0	-1.0961	-1.01648	-0.947874	2.20795	1.75869	1.00082	-0.144706	0	0.581397	2.89161	-0.221164	-1.50003	-1.05235	0.634923	0.179412	-0.624825
0.912501	-1.07352	-3.94878	2.98412	-3.25435	-1.29505	-2.96918	0	-0.409501	-2.47947	-4.67644	-3.8868	-3.96448	0.0402172	0	1.43887	-0.15847	0.589559	-1.13997	-0.670394	-0.890025	-1.28539	1.13316
-0.118248	-1.21007	-3.24658	-2.36825	-5.22312	-1.39696	-2.21616	-1.25695	3.1505	-4.71179	0.126462	-0.148206	0.200334	0.184791	2.45298	0.85349	-0.945088	-0.178466	-3.50003	-1.69591	-1.3285	-1.97118	-0.11274
0	-2.64068	0	-4.04177	-3.27005	0.308735	0	-1.04713	1.77345	-0.439561	-2.05359	-0.169647	-0.837386	1.82937	0.924408	2.3794	0.333448	0.623567	-0.529102	-0.171184	0.794934	0.115674	0.562431
-1.71415	-2.42946	0.143369	-6.56987	-1.11422	2.46595	-1.69496	0.300301	3.22857	-1.92741	0.225503	-1.37123	-1.97017	0.785057	1.22985	2.3241	-0.984249	0.00455156	-2.14485	-1.38013	-0.40742	0.11554	0.893362
0	-0.243784	1.13961	-0.168987	-0.561799	3.57508	1.41445	0.969795	0.151172	3.81838	0.502863	-1.39029	-1.93979	0.304509	1.78095	0.135044	0.841085	0.542748	3.06895	0.749931	0.0107429	1.05675	1.0231
3.40364	0.0341655	-4.49025	0	1.12046	-0.848193	-0.563382	-1.34531	-0.910477	-4.11823	1.33576	2.33613	2.31644	0.714677	1.74979	-0.135044	-0.707811	0.680582	0.850512	0.515908	0.225334	1.22645	0.876478
0.572866	0.146292	0.44346	-0.775112	0.832182	-0.347494	0	-0.907036	0.570019	1.04557	-4.58984	-3.97864	-4.18763	0.686546	1.81878	-0.950448	-0.603929	-2.44272	-3.10974	-2.43068	-0.817912	-0.112931	-3.86428
0	1.27822	-1.48591	-2.04387	-0.832182	2.92365	0	0.0759013	-0.341621	-1.95055	0.209263	-2.55339	-1.87056	2.28759	1.11282	1.48953	0.892081	-0.800919	-0.674311	-0.646491	-0.205528	0.112931	-0.997017
-2.45676	1.09092	3.09531	1.83615	-3.68836	-0.572984	-0.282886	0.755861	0.227877	-1.98935	-0.264405	0.680275	0.0363042	0.172666	0.234765	-0.539085	-0.86138	-0.472182	-2.05065	-1.00742	-0.0324904	0.225479	-3.02261
1.32281	3.04169	-1.1679	0.747238	-0.870833	-1.55165	0	0.0752729	4.08827	2.59359	2.45177	2.45548	1.79861	0.149903	0.156204	-0.406229	1.12663	0.24169	1.37176	0.771288	0.443124	2.13912	-0.147645
0.814623	0.110727	-1.77782	0.0368473	2.02027	-0.959594	-0.283688	0.300526	0	1.0487	2.07731	4.70912	3.64058	0.343926	0.0975039	-0.135777	2.74348	0.175408	1.2187	1.40847	0.430432	1.72663	2.71114
2.38036	2.48197	-1.20302	-0.56155	1.41846	0.160573	-0.855925	-2.27627	-2.43285	-4.10704	0.473311	0.521044	0.923873	0.0298507	-0.36124	-0.408442	1.08941	0.291665	2.39373	0.34904	2.36628	1.5054	0.0575043
1.36717	-0.618135	-5.60022	-2.65801	-3.14761	0	0	1.06871	-1.39022	-4.77038	-0.515492	0.553035	-0.958255	0.787815	-0.78555	0.950448	0.161862	-1.71776	-1.45602	-0.816331	-2.37702	-1.83096	-2.53252
0	0.0678656	0	0	0	0	0	0	0.753867	0	0	0	0	0	0	0.807541	0.0980509	0.721274	1.06102	0.816331	-0.862818	0.75799	0
0.473833	0.774918	2.99471	-1.40999	-1.1696	-0.844245	0	0.530103	0.710948	3.2054	2.2011	0.311689	1.16241	0.450568	-1.23991	0.401338	0.88341	0.8786	1.83012	0.521287	1.29145	0.537925	3.30561
1.74926	-0.112261	-0.311042	-2.20818	0	0.732528	0	-0.0755572	0.260659	-1.26986	-0.258278	1.0628	0.542374	0.477889	-0.892281	-0.133601	-0.202363	1.34152	0.516797	0.690849	-0.859112	0.34276	2.89549
-1.19024	0.479596	0.930239	-1.57446	-1.48151	0.42835	4.48254	1.72353	5.07539	2.52379	2.07818	4.20406	4.26864	0.832669	-0.737862	0.400267	2.29895	-0.156395	0.385853	-0.517689	1.03005	2.19975	0.827819
0.0718647	-1.72286	2.7399	-0.619048	1.77519	-0.209728	0	0.444775	-0.176897	2.61352	-2.56556	-0.704483	-0.097229	1.1427	-1.05044	1.19128	-0.82611	0.958074	-0.385853	0.345423	-1.74442	-0.0418498	0.657357
0	-2.1985	0.150038	0.273818	1.45563	-2.44787	0	0.663475	-1.21127	-1.0679	-1.08697	-1.26331	-0.292255	0.0431375	-1.04087	0	-0.989952	0.25912	-0.776201	-0.518584	-1.88602	-2.82307	-2.04089
-4.15842	-0.611052	0.299401	-4.2217	3.40942	0.963522	1.63047	-2.22892	4.62267	4.35177	2.33692	0.892625	-0.42366	-0.122271	-0.779995	-0.263505	0.834294	0.384847	-1.70273	-0.463232	1.31957	1.79224	-1.0926
0.296534	2.11567	6.36974	-4.40781	2.21003	0.5067	0.537636	3.6153	-1.17041	6.67387	0.644668	2.02524	0.877912	0.122271	-0.261356	0.263505	-0.00778927	2.28353	2.73633	1.55488	-0.196829	1.38599	6.7527
3.5943	-1.854	0.559442	3.24334	1.89451	1.25002	0	0.578036	-3.34479	-2.50361	-2.36349	-0.658541	-0.0323782	0.150835	-0.314532	-2.53178	-0.194929	-0.229556	1.27716	1.53108	0.0547136	0.975415	1.92966
-0.746065	-1.6373	1.65979	-3.45398	-0.807541	0.127041	1.33158	0.215905	-0.538504	11.0558	1.54415	0.587028	0.998881	0.0789181	-0.157638	-1.35872	0.433525	0.360495	-1.40577	-0.961274	-0.416576	-0.227437	0.694894
0.867389	-1.85284	-0.550208	-4.41882	-1.36057	0.27129	-0.264901	0	0.143885	-15.2261	-1.34592	-1.56983	-1.61607	-0.560951	0.0525735	-0.273973	0.222521	1.04076	1.15164	0.283688	0.44939	-1.48058	3.32944
-0.223213	-1.59279	0.82418	-4.36382	-0.549452	1.08615	-0.265604	-0.504506	-0.107894	1.02265	1.60268	0.520543	0.714289	-0.202137	0.251969	0	1.49557	-0.319899	0.76046	0.452234	1.69165	1.35631	-0.0496278
0.183512	-0.699648	-2.07333	3.76515	0.275103	-0.810949	0.530505	-0.216998	0.466703	0	0.633949	0.524385	0.548477	-1.69811	0.439423	-0.274725	-0.864345	-0.314033	-0.379507	-0.508907	-0.215285	-0.332157	-2.05624
0.00992676	-1.84132	0.139567	-0.965384	0	-1.55982	0.264201	0.144718	2.47625	-4.45839	0.862643	-1.35591	-0.322269	-0.110314	0.717744	-0.275482	-0.765714	0.289671	1.25946	0.902941	-0.194154	-0.395875	0.455006
0	0.331842	0.971555	0	-0.550966	-0.163279	1.31063	-0.144718	3.97313	2.99424	0.574338	0.989128	0.643503	0	1.05166	0.412939	-0.054364	0.147953	0.996272	0.727683	2.34753	0.10433	1.0537
-3.32571	1.41549	-1.531	-2.05435	0.275862	0.990665	-1.57484	-0.945806	-1.48853	-0.44346	-0.564233	-0.101758	-0.708081	-1.69942	1.19286	-1.38315	-0.222942	0.834907	-0.559181	-0.111607	0.588856	-0.732604	0.79543
-2.03806	0.783815	1.531	-1.96141	-0.275862	0.106564	1.31408	1.23503	0.67935	0.884962	0.644579	0.999943	0.290276	0.216814	0.666669	0.555557	1.69836	-0.284973	1.17685	-0.223589	0.876832	1.25263	0.321345
1.12897	-1.48906	-0.276625	3.81035	0	0.0793818	-1.31408	-0.506697	0.540177	2.03495	-2.24364	-0.27676	-0.77595	0.342951	0.961835	0.276625	-0.42958	0.315899	3.62797	1.49961	-0.39571	1.21664	1.29952
0.511939	-1.06224	-1.53527	-0.224572	1.09891	1.18968	0	-0.801461	-3.809	-1.59539	0.0821018	-1.19393	0.388727	-0.268296	1.20913	0.138026	0.388747	-0.70066	-1.55599	-1.33187	-0.18799	0.653731	-3.36916
-1.81583	0.241497	-2.27606	-0.969556	-1.37554	0.105109	-0.796817	-1.02942	-0.52604	-2.51679	-1.86379	-0.360313	-0.226574	0.987644	0.736127	0.275482	0.175973	1.10615	-0.604963	-0.616421	0	1.77603	0.652941
0.0891385	0.53125	1.57034	-0.692898	-1.39472	0.26229	-0.534761	0.147711	-2.27606	0.597909	-0.734295	0.99841	0.129534	0.0369399	1.05059	1.90741	-1.86984	0.462723	2.16095	1.06235	-0.419024	-1.7964	-0.0751221
-0.93432	0.846155	3.75305	3.27929	0.280505	0.182736	1.85928	1.10093	-2.29226	3.22609	-1.27147	-2.11399	-0.649353	-0.0591104	1.0684	0	0.285174	0.508182	-2.16095	-0.278474	-1.01288	1.01318	0.997017
-0.34579	-0.656392	-0.684465	1.42768	2.21616	-1.36803	-0.263505	-0.512259	-1.70754	-1.30721	-2.05771	-2.69145	-1.80777	-0.155331	0.962325	-0.677051	-1.5418	1.66773	-1.96085	-0.615387	-0.531633	-4.0948	3.55701
-0.290738	-2.31659	-1.10498	-4.54518	-2.21616	-3.77868	-1.86424	-2.15062	0.112254	-4.17971	-5.73441	-6.92534	-4.09602	-0.0296143	1.02826	0.135777	-1.90836	0.686314	-3.20681	-1.64077	-1.72047	-0.653253	-2.47165
-0.428173	0.575314	-0.417537	0.398596	-2.55333	-4.21481	-1.08109	-0.676949	-0.939327	1.81274	0.161253	2.71319	1.37271	-0.475025	0.63617	0.406229	-3.41252	-0.925356	-5.31447	-2.54202	-2.41505	-4.96256	-7.22225
0.866117	-0.519164	-3.26039	-3.39081	0.858374	-4.63958	0	-1.75109	-2.25243	-3.34887	-6.6866	-3.9149	-4.38942	-0.111661	0.177032	0.135044	-2.88889	2.46488	-1.22035	0.931865	0.1998	-5.73806	3.39631
0	0.544544	1.00359	-2.45995	-1.14614	-2.18713	-2.47605	-1.00348	1.1898	3.04902	-2.42866	0.0149243	-0.0712504	0.00744796	0.204594	-0.27027	-0.572428	1.59416	0.27248	0.520383	0.442577	-0.211989	-2.58212
-0.780269	0.37993	0.142552	-1.77301	0.860837	-6.34195	0.555557	0.0775494	0.380808	0.747947	4.59525	2.23568	1.0282	0.193452	0.185632	0.135227	-1.58254	2.61691	0.813013	1.1468	0.220556	-1.11442	2.19903
-1.84432	2.314	2.67057	1.9536	1.69976	2.77679	2.19187	2.52597	1.77062	1.33237	2.88396	2.34372	1.88685	0.104012	-0.0649321	0.539085	3.28726	-1.32782	-1.22201	1.47145	0.198085	2.96005	-0.822204
0.20352	0.29599	-0.138793	-3.40537	1.11733	2.14096	-0.816331	0.226501	0.335508	0.146951	-0.339837	-0.267642	0.483426	-0.70045	-0.399796	1.60003	-0.160974	-1.41504	2.02847	1.11733	0.657465	-0.930239	0.309119
0.55038	1.87387	0.554018	3.01366	0	0.992888	1.35687	1.05027	-1.27343	1.45775	3.10882	1.34521	1.23247	0.492318	-0.476258	-0.930239	0.484959	0.602908	0.667114	-0.557105	-1.09819	-0.468385	1.22701
1.76826	1.94376	0.688234	4.02381	0.82988	0.400022	0	-0.149365	2.05193	1.15109	-1.40952	-0.367336	0	0.14128	-0.31877	0.266667	-0.898463	2.09776	-0.399734	1.16636	0.220605	1.86052	1.38768
0	3.64523	0.13708	-0.426233	0.549452	1.04011	1.33871	1.18872	5.07577	0.428266	1.06756	0.645471	0.711988	-0.14128	0	-0.668005	1.51815	0.3309	3.79875	1.64297	0.877584	1.14549	0.0250532
3.62499	-0.160135	-1.10194	3.48201	-0.274349	0.0597799	0	-0.36996	-1.30721	-3.03711	-6.121	-4.28486	-3.26209	0.208132	-1.3234	-2.85539	-2.18162	2.23844	-1.55444	-0.271961	-1.27502	-3.00601	0
-1.50035	0.648108	0.276625	-1.3973	-1.66209	-0.212594	-0.266312	0.517561	4.79092	-9.70738	-0.0607128	2.74367	1.73015	0	-0.744989	0	0.615211	1.62658	-2.1109	1.02954	0.881063	-0.447007	5.26951
0.273322	0.172727	1.50791	-0.744349	1.38698	0.910225	0	1.24589	-0.339559	13.8777	2.50688	-1.04803	-0.378072	0	-0.63474	-0.138026	-1.19687	1.7067	0.796817	1.71036	-0.660068	-1.68831	4.05178
1.06794	1.29052	1.35137	-0.10542	1.36801	-1.49048	1.84946	0.797973	0.305655	2.91485	1.09561	2.13818	1.6055	-0.461448	-0.998699	-0.138217	1.49457	0.0249293	0.790518	-0.0530082	1.07587	-0.915448	-2.54231
2.52078	0.57668	-0.403498	0	2.68113	-1.82366	0	-0.144613	-1.95178	-1.10042	-0.422685	1.07141	-0.101712	-0.33626	-0.841575	-0.833338	0.325038	-5.86848	-0.394478	-1.11971	-0.284309	0.795472	-5.33652
-1.72565	0.209284	0	-1.99503	-1.33158	0.310631	0	0.144613	-1.14764	1.10042	0.18808	2.61403	0.642437	-0.789033	-1.00742	-0.699793	1.75659	-2.05689	-1.72762	-3.54744	0.0437924	0.119976	-0.818153
-1.85271	0.916564	2.79088	-1.99572	2.64566	0.40434	0	1.79024	1.76812	0.681666	0.258034	-0.967976	0.67182	-0.083022	-0.987588	0.839166	0.500603	2.10187	0.133958	0.664454	0.632844	2.83707	0
0	1.58296	0	1.28893	2.57746	-2.63726	2.8389	1.54933	-1.10575	-0.681666	2.2012	-0.727853	0.767054	0	-1.40328	0	0	0	0	0	0	0	1.409
1.65643	0.562407	0.26178	0.814329	-1.02303	0.254291	0	0.487976	-0.872454	-1.65521	1.85054	2.88688	1.71282	-0.598283	-2.12697	0.139179	0.91997	2.75008	2.64216	1.53344	1.70391	2.09903	0.51414
0.287765	0.426183	-0.919245	0.165975	-2.60431	0.759017	0.25413	0.0695169	0.454626	-0.69784	-0.101289	-4.3657	0.195759	-0.403395	-1.90821	-0.69784	1.21721	-0.103964	2.06459	0.271371	1.21162	1.33774	1.95871
0.559167	0.629485	-4.31334	0.951463	-0.529102	1.19121	0	-2.10682	-0.489683	-0.140154	0.135029	1.47882	-0.818201	0.251362	-1.99932	0	-1.42244	-0.0136876	-0.769235	-0.10846	-1.31861	-2.04785	-0.0718649
-1.15565	-0.436364	2.58342	0.202713	-2.68833	0.0327661	-1.02042	0.848062	-1.27031	-0.986618	-2.82833	2.41487	-1.75705	-0.0456552	0	0.975617	-0.769933	2.61399	1.02434	1.61467	-0.644332	-1.15608	0
-0.842322	-1.07764	0	0.346554	0	0	0	0	-1.39462	0	0	0	0	0	0	-0.975617	-1.29747	1.24731	-2.84257	-0.0534045	-0.887356	-2.8543	0
1.24875	-1.73993	-0.673403	0	1.88939	2.30151	-1.81117	5.277	-1.45088	-2.29236	-0.53352	-0.698616	0.53369	0.0304391	-1.89693	1.25263	-0.30247	-0.565272	-0.262467	-0.321028	-0.0217415	-1.05847	0.549649
-3.11107	0.803782	-0.814116	-0.375488	-0.536194	1.42515	-1.31408	-7.4108	0.619197	-1.16619	3.82183	1.85781	1.94373	0	-1.91117	2.05346	1.78472	-4.27819	-1.85682	-2.38623	1.05981	5.18373	-1.34359
-1.28946	0.209763	-2.06477	3.78582	-1.62605	-0.49676	0	-0.0719166	0.434783	-1.47713	-0.325131	-1.17609	-1.14849	0.810825	-1.68566	0.40568	0.250416	2.6513	1.98814	1.41692	0.407945	1.36832	2.55171
-0.957652	-4.28577	0.138985	1.64882	-2.21003	0.532525	0.264201	0.645395	0.0722805	0	-2.05351	-3.43504	-1.89911	-0.325056	-0.652438	0.538359	-3.31389	-0.02208	-1.85436	-0.325204	-1.96912	-4.28058	-0.87502
-1.5389	0.681171	1.37933	-1.93715	-1.40649	0.0315461	-2.40332	-2.24079	1.82572	0	1.08306	-1.4766	-1.1162	0.226895	-0.74924	-0.268817	-0.770024	-1.25251	-3.39938	-1.75251	1.06511	2.10534	-3.5541
-0.223497	-0.426324	-3.20139	0.279044	-0.85349	-0.742917	0	-0.292826	-0.426591	-3.94588	2.26467	-1.76216	-0.614127	0.113255	-0.382543	0.804294	0.145904	-0.515076	-0.277008	0.275862	-0.0432526	-1.39862	0.368506
-1.68452	-1.59893	0.141343	0.684998	-0.286123	-0.706867	-0.814116	-0.662011	0.532956	0.463321	-1.45157	-0.561647	-0.0684697	-0.0301887	0.139276	0.399734	-1.63421	-0.0822639	0.277008	0.0275444	-0.433558	0.351494	0.171506
-0.498021	-1.46545	-3.44862	1.59242	0.855925	-1.84094	0	-1.78709	0	-1.39645	0.549606	2.08566	2.93593	-0.0679579	0.8891	0.13289	0.960128	-2.58997	-0.972906	-1.30286	0.411925	1.9688	-2.7297
-0.233845	0.30883	-1.47278	-2.57509	-0.855925	-0.244772	-1.64839	0	-6.51529	-0.312989	-1.62385	0.493442	-0.566952	-0.00755373	1.143	-1.33692	-0.172836	1.09474	2.21003	0.334262	-0.184072	-1.3392	1.86921
-2.8374	0.312537	-1.04401	-1.40728	0.57143	0.109949	0	-1.74313	1.35239	-2.37918	-2.60293	-2.82285	-2.09538	0	0.555337	-0.539812	-3.90697	-0.536075	-1.51414	0	-1.18835	-2.51867	-2.42421
0.384486	-0.565145	0	-5.08757	0	1.70017	0	0	-0.186741	0.799365	1.41353	0.450664	0.272851	-0.113374	0.664604	0.539812	-0.713053	0.728027	-0.55633	-1.34381	-0.428643	1.16129	1.78016
0	-2.76866	-0.150038	-0.0795624	0.851069	-0.60512	0	-1.3857	-3.07483	-1.28207	-1.33189	-2.03678	-1.50998	-0.507981	0.916412	0.402956	-0.0483223	-0.119579	0.139373	0.281452	-0.342032	-3.94092	0.421575
-1.78101	-3.94846	-5.24003	-2.58001	0.282088	0	0	-2.91015	-4.25261	-3.78024	-6.60242	-4.00189	-2.23786	0.0531935	0.698412	-1.75799	-7.81992	-3.81554	-8.5746	-3.08244	-3.83016	-7.74317	-9.24931
-1.72412	-3.31539	-1.91699	-3.67042	-3.73071	-6.14704	0	-2.17838	0	0.834033	-0.888228	-0.335681	-1.35282	0.227652	0.407916	-0.547197	-4.13829	-3.09189	0	-4.38459	1.36863	-3.28428	-12.997
1.44443	1.322	1.28207	2.06495	-1.47278	-3.21301	-4.82363	0	-2.1961	0.827135	0.488876	0.100437	0.322061	0.113632	0	2.83995	-1.26426	-4.45068	-3.08191	-5.03055	0	-1.48886	-8.07642
1.46501	1.27448	0.950879	-1.65276	-0.59524	0.771068	0	0.488203	2.35687	2.76216	5.13058	2.73823	2.01598	0.355213	0	1.19286	4.42104	3.13132	1.24418	-0.12747	1.26071	5.1696	6.7383
-2.01311	-2.29661	-3.3684	0.536476	1.48151	-0.267728	-3.55067	-3.21677	-1.37487	-3.09219	-3.92492	-2.06482	-1.73057	0.654211	0.614239	-0.131839	-4.69725	-0.5538	-0.464757	-0.76825	-0.80863	-2.40268	-3.2153
1.22349	-0.579892	0.650409	-0.462672	-1.48151	0.401324	0	1.41492	5.62079	2.77116	1.14245	2.90653	0.886688	0.925104	0	0.131839	-0.283914	-1.9114	-3.63676	-1.68507	-0.0902527	0.887699	0
-3.118	-0.850004	-7.0499	2.88791	0.891536	-1.24203	0	-2.93522	-2.21842	-7.50978	-3.65712	-1.95233	-1.81726	0.266983	-0.284713	-0.131839	-2.98792	0.191803	-1.13362	-1.24961	-2.2832	-5.90191	-2.15836
-0.942333	-0.367262	0	-2.09009	-1.49034	0.100738	-1.51748	-2.67373	-5.37612	0	-2.03501	-1.22302	-1.66791	-0.0222214	0.120555	1.95957	-0.42244	1.90777	-3.14335	-0.664013	0.690452	7.7855	1.80185
0	0.272952	-0.174064	-1.04053	0	1.20803	-2.16392	-1.58594	-0.54133	0.17316	-2.5404	1.20403	0.837434	0	0.229747	-0.388853	-2.75335	-1.23873	-1.18345	-1.3414	-1.3857	-1.45602	-3.70413
2.17722	0.240838	2.91866	2.80241	-0.904984	0	0	0.266076	0.375079	3.73558	5.1817	3.0311	0.50633	0.221992	0.523162	-0.520835	0.316642	-1.01269	-6.86285	-2.53005	-0.70012	-1.88431	1.37195
0	2.45867	0.50633	0.491905	0	1.48807	1.85764	0.0885348	-0.500418	-1.51136	3.59898	3.69072	2.8802	-0.044359	0.8659	-0.392414	5.81933	1.79677	6.86285	3.47092	3.68986	2.94533	5.14927
0	-2.9567	-0.675678	0.824642	0	-0.131533	-0.615387	-0.44346	1.94583	-1.87879	0.460551	-0.981712	0	0.48687	0.762256	0.26178	1.94061	0.650345	3.50913	2.24877	-0.452438	-0.237749	1.56596
0	-0.131472	0.843887	-0.549005	0	0.982309	0	1.58733	3.97883	0.515908	2.90774	2.30507	1.73736	0.521121	0.288354	-0.392928	1.70322	0.723087	0.491401	-1.05195	0.902839	2.48152	0.124224
-1.95969	-1.34031	6.34875	0	-1.21953	3.11	0	4.94982	-1.30876	8.07022	0.468714	0.681285	-0.241421	0.0951231	0.0213265	-0.262812	-2.77362	-0.072134	-1.64748	0.066072	-1.8139	-2.64033	-0.124224
0.882253	1.50856	-0.632914	1.43727	5.37443	0.346287	5.98981	0.332502	0.43816	-5.36278	-0.280965	-0.017411	0.619623	0.204574	-0.0533248	-0.131666	3.20076	0.932517	1.64748	2.09158	0.45657	1.08024	1.23535
-0.0666961	3.09324	-0.317965	-3.32053	1.72915	2.66883	1.15608	1.56446	3.24564	-0.502093	-1.5834	0.728664	1.97084	0.0875465	-0.0640273	0.263158	-2.89866	-1.07212	-1.31581	-0.714057	0.238867	-3.33053	-2.89605
0	1.50143	0.47657	0.992359	-0.860837	2.57011	1.42656	1.45988	3.32986	0.835427	3.32661	1.03182	2.91798	0.552688	-0.0640683	1.3055	3.22777	0.66918	1.64207	1.16582	-0.330015	2.2503	0.692698
0	-2.65923	0.158353	0.502746	-0.578036	-0.418002	0	-1.13362	-0.559807	1.15799	-0.485045	-3.7122	-2.0136	-0.217802	-0.0854884	0.646415	-0.686052	0.646904	3.36301	1.08871	0.579646	0.528403	0.0940881
-0.053614	-0.724004	0.630917	-0.832439	0	1.13232	0	-0.0814664	0.224299	-0.825769	2.24368	-0.0177573	0.797082	-0.0654331	-0.0534674	0.128783	-0.60334	-2.79935	-4.6745	-3.03935	-0.956509	0.918039	-0.786786
0	1.31482	3.85553	0.123762	-0.290276	-0.26675	-0.568183	-2.14176	-2.72538	-0.832644	-2.55675	-2.19039	-1.63419	0.254222	0.0213904	-0.257732	-3.27035	0.830789	2.92704	0.5892	-0.41275	-1.84458	-1.39996
-1.74016	-1.69964	-2.91655	-0.227015	-0.583092	0.681092	0	0.166389	-0.461539	2.47742	-0.046463	-1.07675	1.5349	0.239105	0.128246	-1.29872	-6.83182	-2.17582	-4.7589	-2.7798	-3.74576	-4.32074	-2.7942
2.03263	4.46307	1.08444	-2.7333	0	0.470409	0	-1.00251	-1.16325	1.29661	1.29287	0.920521	-0.0662471	0.929234	0.330544	-0.392928	5.99111	1.35236	3.46856	1.33335	0.949675	4.32074	2.85827
0	2.01748	-0.61824	0.370901	0	2.29422	-0.57143	1.16863	2.19874	1.75583	4.40877	-0.517664	0.627583	0.136137	0.159549	0.131148	6.67999	1.16955	2.40589	1.77228	1.87271	6.16254	1.65136
1.87844	-4.77067	-0.155159	0.968429	1.1628	0.458615	0	-0.083022	-0.497228	-1.11377	2.02071	0.583092	-0.296785	0.286	-0.0956989	0.522877	-1.42567	1.73116	0.946379	0.389611	-0.104414	-1.23288	2.76458
0	-0.158905	-2.19789	1.80634	-1.1628	1.36237	0.57143	-1.25367	-1.93579	-2.75768	-3.0355	-2.11153	-0.563009	0	-0.42644	-0.391901	2.02027	1.90867	1.94332	2.36963	-0.174267	-3.21571	2.45133
1.6238	0.210111	2.35305	0.656278	-2.06802	-1.39047	-1.14614	3.39016	1.74389	4.02955	4.08397	3.98343	2.42794	0.0285551	-0.826052	-1.58315	5.9129	0.696487	2.65872	1.75663	2.52597	3.97234	4.18618
0	0.168794	0.61824	4.00695	1.18696	-2.69482	0.28777	-2.8868	-2.13559	0.157853	-0.683471	-2.6013	-0.683041	0	-1.00688	0.265604	0.331045	0.852373	-1.20665	1.29752	-0.682597	-1.01011	-0.0573559
-1.76224	-3.29909	-1.24033	0.0294536	0.588237	-0.530374	0	-0.419288	0	-2.71799	-0.139403	-1.9777	-0.786374	0.121268	-0.852371	-1.46963	-2.32813	-1.11821	-0.914641	-1.42197	-1.84337	-0.636539	-1.15408
-3.71311	-0.87536	0.622086	-1.86273	-0.293686	0.360092	0	-1.26852	-2.7857	-1.63402	-1.07888	0.640097	-0.858942	0.163835	-0.406885	1.33692	-3.40247	-1.31637	-3.42713	-2.13979	-4.5192	-5.10917	-4.93707
1.65589	0.542036	-0.934586	-2.7888	0	0.56648	0	-0.170358	0.0806777	3.56025	0.346508	-0.0074195	-0.766032	0.41905	-0.331126	1.71169	1.99564	2.10773	2.34936	2.32642	0.727276	-0.107585	4.3258
2.33977	0.523298	1.39862	-1.32507	0	-0.0791143	0	2.19233	0.643089	2.0457	1.67224	0.385086	1.42741	0.410242	-0.232442	1.16809	0.402619	1.20328	2.29543	0.989495	0.961546	-0.86487	0
-0.480089	0.96538	0.308167	-0.239971	-0.886269	0.925918	0	-0.250522	-0.562476	-0.625002	0.201774	1.16836	1.0818	0.246748	-0.333001	1.1546	-0.628414	-0.238475	-1.37093	-0.0923503	0	2.57249	-0.292398
0.838559	1.24535	-0.308167	0.604043	-0.894194	-0.521757	-2.62024	-1.60138	-0.322841	0.312989	1.32787	1.75246	1.61711	-0.0352125	-0.523941	-0.896867	-0.584339	1.57228	1.0679	0.644668	-0.479617	-1.06384	1.45351
-1.93182	-0.542932	1.53142	-2.07729	-1.20483	-0.357918	-0.888895	0.254561	2.11966	2.77368	1.33113	-0.489333	-0.160539	0.00704349	-0.39196	-0.51613	-0.30791	0.68982	2.10218	1.63888	-0.966191	-1.88939	0.403226
-3.46585	-0.228394	-0.609758	0.497014	0.904984	-1.22493	-2.10534	-1.70944	-1.87743	-1.68586	-1.10108	-2.58682	-0.612411	0.316445	-0.686824	-0.259068	-2.26773	-0.242627	-1.64798	-0.664454	0	-1.64839	-0.663305
-1.8699	0.652649	0	0	-1.20847	-0.193637	0	0	0.0403145	0	2.10839	-0.731842	1.12523	-0.175679	-0.782627	-0.25974	-2.00136	-2.58807	-2.13749	-1.40375	0	0.552488	0
0.107137	1.28246	-2.63377	2.18069	0	-0.627204	-1.22326	-0.865806	-1.37989	-3.61959	1.22988	-1.16636	1.49138	0.330022	-0.846203	-1.30892	2.16553	1.74801	0.461895	0.0614439	0.966191	-0.414079	0.202341
-0.830661	-0.952583	-0.629923	0	-0.609758	-1.09656	0	0.26053	-1.02691	-0.643089	-0.86238	-2.34344	-0.44192	0.328936	-0.911352	-0.660941	1.54305	0.356964	1.37302	1.09958	0	-1.53313	-1.045
1.24947	1.74459	1.87799	1.28187	-0.921666	0.511818	0.30722	2.14508	0.0825423	2.86188	1.24552	1.64692	0.252765	-0.181831	-0.674421	0.529102	-0.990155	-0.140947	0.1514	-1.03818	-1.94181	-1.41445	-0.116788
-0.429403	-0.893997	-0.466201	1.13476	0.921666	-0.20695	-1.54563	-1.0239	-0.870111	-2.86188	3.18902	0.0189915	-2.16914	0.00699962	-0.925987	0.526317	0.604998	-0.595738	-0.91186	-0.0614062	0.488999	3.30655	-0.204708
-0.611067	-1.12885	-4.45934	-1.07365	-1.23078	1.39701	0	-1.73015	-1.72092	-5.12933	-3.74404	-3.91144	-1.00471	0.272604	-0.507645	0.523561	-2.5154	-1.90037	-3.10102	-1.29832	-1.47423	0.0551116	-4.92001
-2.15713	0.842716	-0.817666	-4.1586	-5.73405	2.09991	1.8519	-0.0872981	-0.424269	3.99388	-1.17056	-1.26788	-1.41055	-0.342622	-0.712677	-1.57898	-0.226388	-0.652586	-4.34501	-0.812251	0.493828	-2.76515	-1.33108
-2.06832	-0.122882	-2.32569	-3.47805	1.30295	0.260942	-3.10584	-1.76216	0.424269	-1.31365	-0.967086	1.09791	-1.49778	0.0560185	-0.609794	-0.932718	-2.94602	-1.8507	-2.66682	-1.70836	-1.53887	0.817943	-2.81264
-0.0597164	0.189379	0.167926	-3.15998	-1.30295	0.636244	0.941922	0.44346	-2.4428	0.98685	1.05919	2.43481	1.36555	0.335454	-0.107998	1.06526	0.274236	0.277854	-0.677969	-0.833071	-0.262977	-1.41445	3.46491
-0.604107	-0.297025	-1.86288	0.655814	1.30295	-1.30525	-3.17487	-2.59988	-1.31006	-2.99026	-1.6502	-1.24322	-2.41056	-0.735272	0.263789	0.396564	-1.24003	-1.0476	-0.170213	0	-2.29574	-3.03711	-1.43439
-0.153882	0.143501	0	-0.169195	0	0	0	0	-0.396389	0	0	0.11721	0	1.0696	0.143592	-0.396564	0.370172	0.832931	-0.683763	-0.710368	-0.527434	0.293255	0
-0.57239	-0.544345	0	0	-2.95588	0.320252	0.643089	0	-0.397966	0	0.776924	-1.78865	-0.748303	0.062563	0.226934	0.132363	-0.467266	-0.129966	-1.90482	-0.911465	-0.776904	-0.734757	0
-0.910475	-1.28526	0.170794	0.0451467	0.664454	1.44419	0	0.362648	0	-0.676822	1.33253	1.15014	0.951417	-0.508588	0.333492	-0.397615	3.61148	1.30379	3.94224	1.8789	0.764005	1.34781	1.0311
-1.65841	0.281265	1.18746	0.5514	0	-1.00792	0	-0.0905387	1.10158	3.99388	1.59599	1.16426	2.00877	0.696042	1.02917	0.132714	-0.0870409	-0.279294	-2.2091	-1.35705	-1.03735	-0.759571	-0.654922
-0.560984	2.66368	0.504627	1.34874	0	-0.145549	0	0.722025	2.21027	0.162999	0.569574	0.503682	-0.165865	0	0	0.792607	5.15645	2.12922	6.3249	1.35705	2.06406	2.60507	2.44178
-0.67554	0.177103	-0.842465	-1.70849	12.4384	0.203506	0.956945	-0.360361	-0.1716	1.13362	-0.159553	1.80772	-1.26965	0.297815	1.06527	0	-1.23541	-0.0401031	2.07509	0.192369	1.52056	-4.38026	0.548113
-2.33327	-1.5437	-1.1915	0.471911	-2.06802	0.0569077	0	0.808993	-0.775866	0.801929	0.765525	1.30469	0.0672269	-0.15226	0.511035	0.131492	1.27676	0.0950756	3.11067	-0.128205	0	5.74237	-0.517584
-0.664513	2.0329	-0.859851	0.112032	-1.50379	0.289119	-1.27797	-0.808993	2.52096	-2.58914	-0.0297162	-1.47184	-0.404041	0.00692593	-0.115915	-0.791561	0.65601	-0.39234	-1.69888	-1.61659	-0.264434	4.2219	-0.581664
-1.67814	-0.317453	0.859851	0.391128	-2.45411	-0.72386	-1.29452	0.270392	0.210748	0.490598	0.306643	1.67019	1.2739	0.117667	0.0463822	-2.54876	-1.33876	-1.74681	-0.625002	-1.90858	-0.5183	-0.433253	-1.79683
-0.926315	-2.43684	-0.687288	0	-0.936044	-1.14008	0.649353	0.0899685	-4.30174	-2.31033	-0.793261	-1.76528	-1.13904	0.117529	0.0926999	0	-0.208303	1.17621	6.5224	0.860078	0	-2.05628	1.64319
0	-0.830871	1.70944	0.0668971	-1.89879	-1.18246	0	0.0898876	4.13318	0.333334	-2.11275	-0.882949	-2.24882	0	-0.0463392	0	-1.38905	-1.33717	-0.884962	-0.0658979	-1.28837	1.37554	-2.2389
-3.81449	0.166727	-1.02216	-0.525229	1.26986	-1.46754	0	-2.27179	-3.17079	-0.166528	1.06196	1.48619	-0.137931	0.0897821	-0.173964	-0.681666	1.38263	0.520583	-0.743498	-1.39398	-0.269975	1.62605	1.06351
5.17701	-2.40785	0.171086	-1.79757	0	-1.98219	0	0.366973	-0.348888	-0.33389	-1.65343	-1.49387	-0.831606	0.310163	0	-0.962207	-2.74177	-3.00748	-1.05027	-0.738011	-0.619837	-0.809721	-3.16082
3.46872	0.722639	0.170794	-3.78983	1.56498	0.460515	0	0.63898	0.783294	0.998344	2.49495	1.91663	1.14168	-0.0895039	-0.232423	0.688234	-0.0659696	-0.346512	-0.302115	0.470273	-0.519482	-0.789012	0.67211
-3.43072	-2.09182	-2.41808	-0.130417	0.927364	0.306193	-0.324149	-1.74396	5.60501	-2.5148	-5.45329	-4.66079	-3.35813	-0.227563	-0.0581903	-0.137268	-5.28801	-5.40438	-6.88848	-2.57991	-2.63868	-5.0704	-8.06809
-1.56256	-0.178567	1.21635	-2.8276	-2.49234	-0.520549	0	1.01337	-8.41838	0	-1.14432	-0.712874	-0.74987	-0.0828787	-0.279786	0.956945	0.0765031	-0.102463	1.04797	-2.71888	1.06384	2.80511	-0.103788
-1.91135	-0.739295	-0.693244	1.3576	-0.950879	0.520549	0	1.81658	1.32863	0	-0.309515	0.479769	-0.0717103	-0.339136	-0.128497	-1.50791	1.88357	1.48213	0.0801603	0.634028	0.790518	3.59484	1.88588
-1.59778	0.961102	2.91366	0	0.634923	0.27531	2.56424	0	0.175824	3.66708	0.330826	-0.0593507	-0.792226	-0.625915	-0.222339	1.77965	-1.1735	-0.0589908	0.479617	-0.351741	-1.58733	-0.920667	-2.0591
5.01062	1.91084	0.841048	0.695864	1.88093	0.242544	1.25788	0.98523	0	1.62341	3.45548	3.43896	2.78093	-0.0139538	-0.587477	1.07963	2.05989	1.44277	-1.12271	0.421942	1.06102	2.60452	1.75292
2.06438	-1.30205	1.49629	-0.419338	0.619197	-0.792847	0.312013	0.798939	1.35226	0.642057	1.41035	1.46531	1.53527	0.160351	-0.35415	-0.673403	0.626919	-0.352072	1.91699	0	-0.529102	0.581397	0.0681199
-0.676557	-0.338956	0.16488	0.0720115	0.615387	0.489308	0	0.792607	-0.173461	0.796817	0.889074	0.52245	-0.207972	-0.223168	-0.581156	1.47555	1.21562	-0.365156	-0.158353	-0.774925	0.0397799	-1.48662	-0.992309
-0.481396	0	0.164609	0.083948	0	1.99137	0	0.0876808	0.389864	0	0.301296	2.31233	0.0346921	0.132566	-0.608485	1.19128	1.31902	0.135767	0	0	0.542078	-1.02151	0.446046
0	0	0	0	0.306279	0	0	0	0	0	0	0	0	0.0975678	-1.17974	0	0	0	0	0	0	0	0
-0.170565	0	2.43716	0	0	1.57205	0	3.27616	0.129618	0	1.56214	-0.857174	-0.0693963	0.0139305	0.615684	0	0	0	0	0	0	0	-0.997772
-3.23229	0	2.0652	0	1.81823	-1.06442	0	0.338696	-1.69828	4.652	-1.84332	-0.987644	-0.104185	0	0	-0.527706	-2.45067	-2.10314	3.73294	-0.425231	-0.250842	-3.2961	-5.72805
-2.00115	0	-1.26584	3.98337	-0.300752	0.23775	0	-1.19049	1.65509	0.453516	0.241061	1.18327	1.14011	0.430885	-1.14992	-0.397615	-0.444131	-2.73384	-3.89154	-3.91071	1.61283	1.60668	-1.54985
1.53748	0	2.82593	0.608673	-3.36938	0.266276	0	1.10592	-0.911267	-4.78856	-0.856385	-0.662242	0.205903	0	-0.451468	0.132714	2.34952	2.81199	0	0	2.56819	2.79113	4.96929
4.34793	1.18402	0	0.262993	0	0	3.06773	0	0	0	0	0	0	0	0	0	0	0	0	0	0	0	0
-4.43373	1.83646	0.309119	0	2.15725	2.36612	0.602411	1.34456	4.4338	5.08976	4.09394	3.28617	4.13018	1.17202	-0.281673	-0.265604	2.44355	1.85183	5.25623	3.76856	2.75086	1.01038	4.42979
-1.48244	-0.398198	0	4.07261	-4.36206	2.70024	0.29985	0.250104	-0.0417101	0.150263	0.252207	0.733653	1.95446	0.389917	-0.184128	-0.935211	-3.26709	0.382683	-1.21214	0.638074	-0.568956	-0.557105	-0.645273
-2.26231	-2.54147	-2.34203	0.0548035	-1.92932	-0.424511	0	-1.76401	-5.22379	-3.98215	-1.37543	-2.14442	-1.88869	0.476775	0.13506	0.935211	0.00332099	-0.296685	-1.69105	0	-1.49965	-0.640515	-1.23416
0.0973081	-0.248019	0	-1.32365	-0.978801	-0.0674543	0	-0.765635	0.788095	-0.626961	-0.245857	1.14461	1.46846	0.325623	0.648201	-1.74384	0.546458	0.980613	-2.03609	-0.353983	0.502387	0.400802	0.0344887
6.46456	0.420191	1.41179	-0.133333	-0.988476	5.49823	0.597017	2.86215	0.217818	2.63786	-0.246463	-0.241594	-0.42201	0.196218	0.413626	-0.13541	-1.07922	-0.613772	-2.56424	-0.49769	2.52364	1.84946	0.0689417
7.58224	1.45162	0	0.377317	2.93659	10.1659	0	0.0829531	-0.0870701	-0.306749	0.913787	0.794697	1.09998	0.371083	0.520677	1.07818	3.21951	1.6502	4.28978	4.11926	1.68377	2.09825	3.48774
0.415403	3.10381	0	0.486189	0.960007	-10.0288	0	-2.51902	1.55578	0	-1.32922	-0.286944	-1.19762	0.282448	0.505964	-0.402956	0.43871	0.150062	-0.780644	1.82994	0.706209	-0.282377	0.133023
-1.16157	0.553195	-6.43309	-0.508345	0	-5.49049	-2.10534	-1.45613	-1.77379	-5.85147	-1.8608	-1.31245	-0.555103	0.495714	0.682597	0.402956	2.89949	0.901112	1.0912	0.602613	-0.0119282	1.12476	0.563382
-2.3332	-2.76033	-2.01349	-1.33841	-4.89494	1.85835	-0.609758	-2.09249	2.11625	-0.489797	-0.343921	0.949007	-0.196657	0.573029	0.440608	0.534761	-0.0562975	-1.29199	-2.83038	-1.27647	-1.44181	-0.356507	-1.36419
-0.86009	-0.305023	0	0	-0.335009	0	2.10311	0	0.554018	0	0	0	0	0	0	0.133245	1.07046	0.579659	2.05216	1.076	0.205525	-0.896867	0
0.886538	0.236736	0.675678	0	0	-0.262956	2.9505	2.43702	-0.596762	0.489797	2.01622	0.847189	-0.295712	-0.206179	0.415012	0.663572	1.36492	1.00729	2.46926	1.85559	0.241255	0.51348	1.19882
0.231225	-0.0525597	-1.35595	2.5388	1.33335	2.17618	2.19979	0	0.469184	-1.31149	-0.0894143	2.26547	-0.42869	0.0332834	0.10644	-0.663572	0.472137	-0.447306	-1.53613	-1.05612	-0.579992	-0.153767	0.758454
2.28289	0.74377	2.85974	-0.758204	-0.998344	2.84743	1.77595	1.1116	1.89679	2.12253	-0.288658	-0.430756	0.560226	-0.0332834	0.200744	0.79576	1.54691	0.191603	4.83478	1.51468	2.40658	3.55246	0.360715
-2.37246	0.229346	0.990107	0.275376	2.96562	5.14774	1.2219	-1.02565	1.12104	0.80451	-2.18682	-1.17914	-1.25663	0.126418	0.223885	0.263852	-1.78727	0.0989818	-1.33632	-0.853304	-1.91096	1.23003	0.977206
0.199797	-2.28551	1.46702	0.329453	0.647251	0.833353	1.31617	2.87912	0.412032	1.43201	1.33592	-0.284505	0.497926	0.636312	0	0.131666	1.76632	1.14502	1.33632	1.82892	0.912262	-0.711572	5.14878
6.04025	0.180947	1.76428	0.797165	0.322061	-2.26887	1.02982	0.416494	0	3.11067	-0.635371	0.875814	0.594257	0.145253	0.504844	0.786374	-0.110797	-0.448289	-0.295421	-0.259235	0.107482	1.56368	-0.896867
0.331728	-0.940228	0.633917	-1.23668	-0.322061	-0.894025	0	-0.583578	-0.164609	1.51979	0.393801	1.27685	0	0.309608	0.315697	0	0.323063	-0.488226	-0.148039	0.323939	-1.5396	1.44407	-0.186567
0.876184	0.588678	0.157853	-1.63201	0.963089	0.0252427	0.0269578	0.666669	-1.11826	1.64551	0.532691	0.208914	0.754226	0.452801	0.721185	-0.523561	2.43109	3.79198	3.35064	4.3664	1.98026	3.17487	4.14567
-1.71882	-0.679965	2.33838	-1.47717	0.953902	3.2337	-0.148358	-0.416147	0.746891	-2.25066	-0.291121	2.55152	0.878197	0.222368	0.554786	-0.13132	-0.769538	0.355238	-2.02612	-0.434379	0.438727	0.461895	0.773353
-4.82803	-0.360593	-2.65433	0.260934	-0.634923	0.57001	-3.29293	-2.79088	-2.08863	0	-0.726469	-1.68571	-1.3038	0.339138	0.677735	-0.131492	-1.1581	-0.165312	0	-0.31143	1.17621	-1.83705	-0.504977
0.75733	-0.57316	1.25788	-1.67956	-2.25452	0.541753	2.01609	1.27824	-1.53129	3.13693	-0.294103	0.409505	0.360243	0.234116	0.411288	0.65574	-1.36126	0.139897	1.1628	1.30154	-0.351412	-2.13481	-1.80293
-2.83545	-0.396643	0.156128	-1.07733	1.93554	-2.56401	0.300301	1.4292	-0.990747	-1.78046	-0.846555	-0.244125	0.163319	-0.110486	0.0797766	-0.130804	1.42067	1.04532	0.432589	-0.803714	1.4677	0.573752	2.48553
-0.0341713	0.244692	0.155885	1.76628	2.21178	0.176059	0.922541	0.166806	-0.651468	1.48591	-1.30936	-0.217118	0.130463	-0.00650301	0.182108	0.261438	-1.14693	0.570049	0.430726	0.557105	-1.83213	-0.477898	1.0006
3.54601	0.563229	0.155642	-0.769632	0.933133	-1.90615	0	1.32452	1.59934	-0.295421	1.48334	1.31953	1.58451	-0.0975959	0.170426	-0.130634	2.57113	-0.933151	1.84533	0.615387	1.87837	2.03895	-1.86203
-1.83565	0.522476	0.1554	2.50526	1.84054	0.230378	-0.568799	0.082203	1.9954	1.17648	-0.934826	0.651601	2.2209	0.162607	-0.0227066	-1.05126	-0.761175	-1.11353	-2.13228	-1.29671	-0.0462428	1.814	0.535556
0.0383283	1.24928	-0.311042	0.179775	3.8753	-3.09366	-0.927828	-0.164474	-0.50569	-0.881063	1.69877	-0.169279	0.250705	-0.169117	-0.238731	0.395518	-0.221504	0.866506	0.573067	0.619581	1.17256	0.482815	0.680174
-0.437124	-0.132728	0	-1.93829	0.291971	-2.29669	0.982139	0	0.337411	0	0.253357	1.68337	0.156372	0.0455596	-0.170872	0.524936	1.16111	-0.245325	0.995033	1.71468	-0.435231	-1.3857	-0.413468
-1.44836	-0.468609	3.82017	-1.10486	0	-0.650997	-0.0407304	-0.329761	0.294303	0	1.08719	1.0078	0.591994	-0.0911399	-0.0570223	0	2.11959	0.836008	0.845075	0.725956	1.43592	0.116212	0.85458
-3.43055	-0.283294	-5.39007	-3.91791	-2.9588	-2.25579	-0.299198	0.0825423	0.377122	-4.52566	-1.20872	-1.0178	-0.999072	0.12367	0.0456204	-0.656601	-3.21863	-1.53845	-2.2696	-1.2739	-2.32369	-3.88398	-1.38871
2.06059	-0.881726	1.25788	0.288427	0	-1.20261	2.79363	1.87991	-0.0418323	2.58963	1.71803	0.872557	-0.850801	0.551394	-0.0570288	0	-0.670029	0.247632	0.714799	1.51472	-2.36711	-0.7271	-0.119083
2.54247	-2.593	-0.626961	1.10986	2.08031	-0.225622	0.475688	0.24262	-1.73037	-1.05821	0.427415	-0.925886	0.379028	0.284238	-0.217007	1.0485	-0.133951	-0.295257	-2.30558	-2.12709	0.0237135	-1.96518	0.267738
5.11541	-0.51674	-1.4252	0.709558	-0.589972	1.01033	0.931582	0.483482	0.805601	-2.77368	0.98698	0.783745	0.440391	0.0580402	-0.114403	0.390371	-0.501673	0.444583	0.291121	0.490197	-0.154239	-0.397714	0.118765
0.275678	-0.290098	0.952388	0.798126	0.589972	-0.0559172	-0.43191	-0.241449	0.589475	1.24225	0.499634	0.895745	0.50094	0.180354	-0.194787	0.259404	-0.781395	-0.548623	-0.875918	-1.60201	-0.440293	-0.875553	-0.894194
-2.42425	0.167467	1.41179	0.757006	-0.294551	1.1949	0	0.722605	0.125865	1.53142	0.914403	-0.882514	-0.532333	0.34691	-0.114758	0.387848	-1.42208	0.0377926	2.17558	1.72418	-0.250761	-1.39155	-0.872055
1.36554	-0.941447	0	-1.04969	0	0	0	0	1.37416	0	0	0	0	0	0	0.514802	0.750026	0.810546	-0.431345	0.547947	0	0.660236	0
2.19492	1.61406	-1.72824	0	0	-0.332162	0	0.319489	1.35554	-1.68586	2.49595	1.24576	1.21705	-0.134767	-0.149382	-0.25707	2.55798	1.23268	2.13836	1.5663	3.08441	2.376	3.03414
0.346743	-1.50715	1.10324	0.514561	-0.888895	-0.918684	0	0.159363	1.13591	1.07611	0.103837	1.47858	1.32493	0.121939	-0.0115002	0.385357	-0.130359	0.0478314	0.562589	1.48327	0.485719	-0.644684	0.0585823
-3.81127	0.683821	0.156617	-2.74346	-0.597017	2.75882	0.0262295	0.238569	0.563155	0.305344	1.35878	0.820596	0.579889	0.422428	0.321507	-0.385357	-0.451642	1.56742	1.11577	1.80921	0.161383	-0.498754	3.14192
0.721199	0.573706	0	-1.63175	0.597017	0.107869	-0.288904	0.15873	1.23581	0	1.79869	0.601539	0.516013	-0.0447184	0.354752	-0.64558	1.86756	-0.367195	-0.975617	-0.871339	1.4976	0.871194	0.650547
1.61903	0.0721761	1.39862	1.13899	1.18345	-1.56059	0.864219	1.33913	1.14242	0.759305	-0.826148	-1.23242	-1.24906	0.598842	0.455893	-0.780238	0.0233809	-0.0196892	-0.98523	-0.467837	0.204035	-0.0991818	0.0281889
-1.34091	0.216216	1.37933	0.612578	0	1.53387	1.03762	0.857037	0	0.903621	-1.76683	3.76404	-0.954882	1.1054	0.22717	-0.261438	0.565319	0.39473	0.704725	0.351083	-0.204035	-1.90339	3.87002
-1.10536	-0.940332	0.152091	1.80378	0.293686	0.97344	-0.751202	0.772801	-0.825963	1.78311	0.458652	1.16575	-0.527542	-1.26432	-0.204429	0.261438	-1.29268	-2.82695	1.39472	0.814431	0.475437	-2.66477	-5.28929
0.966187	0.279127	-0.76278	-1.52874	-1.77519	0.900386	0.0467909	0.230681	-3.41467	0.147167	1.55674	-3.59589	1.91069	-0.523027	-0.375876	0.780238	1.54227	-1.25238	-2.66682	-2.34477	0.69773	1.23873	0.17138
-1.35681	-0.575855	0.153022	-0.911715	-1.80728	1.11767	0.956995	0.841305	0.0816994	1.89372	-1.93099	-1.80404	-2.09755	0.0319703	-0.0913346	0.64558	-0.555161	0.0198445	1.41245	1.06196	0.0224266	-0.102643	-0.429001
-1.73565	-0.173967	2.26767	-1.77512	-0.916037	0.57537	-0.268069	-0.611155	-1.2739	-1.01524	0.0187459	-1.97865	0.311236	0.586437	0.205386	-1.03494	-0.892955	-0.575922	-0.562589	-1.89579	-1.69611	-2.0753	-2.3783
-0.255355	-3.2597	-2.26767	4.79019	0.611623	-1.30603	2.00334	0.687288	-2.72496	-2.06193	-1.88265	-1.60625	-1.06218	-0.00635586	-0.0570093	-1.44076	-2.55561	-1.7796	-5.21102	-3.53049	-2.16723	-1.74515	-4.10422
0.240732	-1.53201	-2.32029	-1.0107	-1.22701	-1.01841	-0.833253	-0.534149	-0.596762	-1.19762	1.37528	1.58978	0.782109	-0.0508615	-0.354185	-1.46182	0.0814246	0.648585	0.740196	0.802226	-0.443822	0.823487	2.05818
4.04007	0.944205	-0.470589	-1.53547	-1.55524	0.289885	1.04806	0.762199	-0.213995	3.69591	0.460505	0.640028	1.20801	-0.146371	-0.229174	0.26738	0.454157	0.600748	2.62024	0.429317	0.046811	-0.530505	0
0.719912	-1.13884	1.40518	0	-3.50913	-0.839013	-1.2907	-0.151976	-0.903815	-3.24512	0.700774	1.3002	0.123077	-0.421214	0.320697	0.133422	2.03179	0.901719	-0.865806	1.277	1.8547	2.62482	0.597373
-0.901013	-1.43306	2.14732	-1.40116	0	-1.8509	0.751548	-0.228398	0.38835	-0.300301	-0.991867	-0.274881	-0.493219	-0.467965	0.228441	-0.668899	-0.625334	-0.47775	2.00868	1.91508	-3.48247	-0.207469	0.4457
-0.280568	0.352734	0.303031	-0.953319	4.75525	-0.144922	-1.79262	1.06142	1.36871	-0.301205	0.337965	1.33496	0.677551	-0.115726	-0.217007	1.33335	1.32857	-0.199984	-0.427047	0.236827	1.89652	0.981666	-0.207746
-2.18889	-0.628613	-0.303031	0.0368347	1.53613	0.602461	0	0.225989	0	-0.757006	-1.1405	0.522677	-0.276625	-0.0643501	-0.171654	-0.132538	-1.03902	-3.33081	-0.142755	-0.712169	-0.690829	0.640617	-3.01591
-3.93224	0.730018	0.906351	-1.14823	0.910477	-0.209726	2.55116	1.64183	1.09845	0.15186	-0.284792	-2.40642	-1.11422	0.199351	-0.0916695	-0.132714	1.28107	0.37063	-1.00503	-0.178838	0.0822127	-1.00116	-1.29432
1.57803	-0.976553	0.599702	0.173697	5.29535	-0.321213	0.502514	0.29564	3.54969	4.01541	1.73409	2.50809	1.94181	0.0321161	0.286189	-1.33692	-0.604779	0.36201	1.43269	0.0596481	-0.0117405	-2.50797	0.680064
1.66848	0.240529	-1.35442	0.123885	1.4225	-2.39258	-0.754721	-0.666422	-0.202963	-2.9588	0.985504	1.34997	-1.16673	-0.793066	0.36513	0.134499	0.823002	0.552589	-0.142349	-0.238806	-0.1998	0.790518	1.34641
2.93311	0.060042	-2.45411	1.66977	0	-4.02218	-1.27067	-1.34632	1.05094	-1.51289	-2.25486	0.381489	-0.526398	-0.103627	0.204802	-0.674311	-1.67056	-0.702561	-0.428266	-1.02134	-2.61024	0	-2.24383
-0.813757	-0.433109	-0.779427	-1.29904	-0.851069	-3.40856	1.52287	0.750191	-0.0804505	-0.918843	1.11975	-0.378356	-0.873096	0.0583034	0.159001	0.405132	0.342244	0.115523	-1.29591	-0.970881	-0.739352	-1.32102	-0.0310897
-2.62462	-4.24862	0.468385	0.578072	-1.43474	-1.52945	0	-0.524542	-1.37766	1.52675	-1.78433	1.16796	-0.786044	-0.200966	-0.204476	-0.134862	-1.94504	-0.924279	-4.74867	-2.03272	-1.40891	-1.87925	-2.26425
0.812317	0.695775	0.311042	1.6662	0.57637	0.0616726	0	1.19494	1.17625	2.9853	1.37176	1.44179	0.597956	-0.0324517	-0.673173	-1.49561	0.992119	1.46022	0	0.620349	0.541407	-1.50173	2.23315
1.72152	0.0312276	-1.40737	0.0482335	1.42656	1.16461	0	1.18083	-2.8217	-0.442153	0.599533	0.817671	0.843623	0.103808	-0.920075	0.410117	1.95519	1.28144	0.907722	1.35137	0.940465	-0.165198	1.97111
0.774217	4.39195	-1.10848	1.51944	0	-0.397432	0	-0.884309	-1.37818	-2.84663	0.23322	-0.4308	-0.280418	-0.103808	-0.905299	1.22035	-0.116707	-0.075415	0.45079	1.39354	-0.231242	-2.03208	0.0609756
-2.01743	-0.828137	-1.76711	1.91692	1.9636	-0.152536	0	-0.222305	-0.294799	-1.37722	-1.80524	0.33085	-0.218648	-0.0974184	-0.65505	-1.35687	-2.29746	-0.600595	-2.42804	-1.21067	-0.721495	-1.15968	-1.9699
-2.9122	-2.52019	-2.62741	1.51439	0.554018	0.489009	0	-0.969072	1.17402	-2.81269	-2.50746	0.727649	-1.35371	0.201227	-1.03811	-0.273598	0.155215	-1.22422	0.306749	-0.0609199	-0.813313	-2.44793	-1.15681
-0.179478	1.55137	6.75498	-0.563771	-0.276625	-1.59701	0	3.53238	0.58188	5.54842	0.233214	-0.174636	0.537381	-0.181736	-0.74987	-1.93644	1.09751	0.654862	-0.306749	-0.060957	-0.0990344	3.86038	1.43618
-0.820695	1.2997	1.84905	-0.184779	-0.277393	-1.1523	0	1.29312	-0.207426	1.19226	2.13183	1.9724	2.1211	-0.312317	-0.503055	-1.40649	2.3326	1.10815	0.765115	0.060957	0.481869	2.21923	2.9023
-2.01378	-1.14163	0.304878	-0.486675	0	0.250393	5.15452	-0.142857	-1.25367	0	-1.17553	0.768227	-0.402042	-0.202225	-0.602194	-0.85349	-0.410085	-0.543577	0.607905	1.09092	0	1.22701	-0.150671
-2.37697	-0.109409	-0.152323	-0.570798	0.277393	-1.09957	0	0.285511	0.545189	-1.04245	-2.42289	-1.90933	-2.06645	-0.150302	-0.132971	-0.573067	-3.30079	-3.46474	-1.98935	-2.62611	-4.20399	-3.27808	-5.45364
0.501563	-0.971682	0.304414	-3.93142	1.10194	0	0	0.992916	0.708484	-1.66042	1.71862	-1.33584	0.0632511	-0.452267	0.0120956	0.573067	0.280756	1.01816	-1.87213	-1.49629	2.17441	3.03388	0.666563
-0.501563	-0.307522	0	-0.940006	0	0	0	0	-0.416147	0	0	0	0	0	0	0	0	0	0	0	0	0	0
0.501563	-1.6208	-1.22326	0	0.546449	-3.56951	1.66077	-0.282686	0.416147	1.5106	-0.816569	-1.42764	-0.92108	-1.28266	-0.0120956	0	0	0	0	0	0	0	-0.507454
-2.29352	0.300056	-2.17738	1.1706	0.272109	-3.5646	0	-0.283487	-2.39558	-2.73573	-1.30669	-1.23035	-1.57585	-0.346621	-0.0604997	0	-3.94212	0.169506	0.627946	0.813267	-1.90482	-1.25753	-0.414211
1.03208	0.888619	0.313972	0.254253	-1.36801	-3.13565	0.469484	-0.284293	0.254885	0.153965	1.51146	1.52793	0.452782	0.0467305	-0.145349	-1.14944	0.241703	1.34459	-0.31348	-0.938974	0.766287	-0.413509	0.318776
2.31513	0.432126	0	2.01108	-1.10804	2.04354	2.31492	1.273	1.18095	1.67815	0.998312	2.12161	1.72749	-0.683099	0.0484731	2.42696	2.30381	0.918738	0.62598	-0.314961	1.31448	3.26116	3.07138
2.29464	-1.1399	-1.4207	1.85517	1.38315	-0.0337191	0.456622	-0.281492	-3.10862	-2.45035	-0.82313	-0.378583	0.285036	0.221514	-0.121227	-0.849863	-2.69765	-0.240578	0.311527	0.941922	-1.2636	-2.10762	-2.81709
1.18218	-1.95036	-0.637961	-1.09955	-1.66209	0.342682	-0.456622	-1.20526	-2.18636	-0.934586	0.0777605	-2.75905	-0.889459	0.080429	0.0727537	-0.427656	0.0465976	-1.02926	0.310559	-1.8928	-0.012717	-4.49608	-0.22247
2.16098	-0.216244	-1.28826	-4.81905	-1.40649	0.544667	0.456622	0.2849	0.880287	-0.156617	1.2648	-1.01082	-0.447714	0.740917	0.169553	0.569802	1.41243	-0.135089	1.23268	0.254453	0.215969	1.81154	1.13889
-0.656042	-0.101924	-2.29518	1.6161	-0.568183	-0.956027	-0.915338	-1.21647	-2.61946	-0.786786	-1.52749	-1.36913	-0.160385	0.0332458	0.0725777	-0.999295	-0.31898	-0.358901	0.610689	0.253807	-1.0076	-0.986618	-0.852951
-1.17752	0.318168	2.94139	2.99101	0	1.22785	0.458716	0.645858	-1.04003	2.18759	-0.263376	-1.97145	0.160385	0.0199422	-0.133099	0.286533	-0.54214	0.133752	0	-0.253807	1.05835	-0.283688	1.19837
1.99839	1.60084	-1.29661	-0.508125	0.568183	2.1472	3.8164	2.12322	-0.821547	3.19419	1.16529	-0.152027	0.447714	-0.179623	0.0726216	0.428266	1.78773	-0.264637	1.36057	0.317159	0.770741	1.15804	-0.786786
-2.83635	0.0937412	1.77854	-1.78096	-0.283688	-5.45639	-1.77782	-0.632247	-0.0917011	-3.19419	-0.87269	1.00811	0.0637959	-0.146598	0.169246	-1.43474	-1.41777	-0.581614	0	-1.66032	-0.758058	-1.44254	-2.91734
2.99366	1.81367	-0.80451	1.31786	1.12996	-0.562749	2.21739	1.74646	0.274851	0	0.408204	-1.19279	-0.415402	-0.320599	-0.060412	0.2886	1.63598	0.703373	1.19404	0	0.253325	-0.80092	0.454399
-0.79461	-2.34604	-0.974034	0	3.85723	3.39577	1.09052	0.896249	0.592932	-1.24418	0.599557	-0.233774	1.11448	-0.133887	-0.108834	-2.03792	0.55549	-0.273556	-1.34431	-0.128866	-0.253325	1.11382	-1.92911
1.2931	-1.14316	1.45752	-2.29951	-0.270636	-0.717933	1.29312	0.410959	-2.71969	1.55283	0.806611	0.447588	1.1022	-0.0267989	0.0483851	0.586512	1.79024	1.01853	-0.906351	0.257566	0.720291	3.32386	2.89592
1.55231	-0.0508292	3.32046	1.55885	-1.63938	1.56606	1.27661	1.02007	-0.233918	2.43543	0.286506	-0.272206	-0.37653	-0.261666	0.15709	-0.292826	1.29277	0.499992	2.69477	1.15091	-1.72725	-0.550966	0.416067
-3.25396	0.816486	1.38998	-1.0123	-0.552488	-4.24389	0	1.41084	-0.375411	0.300301	0.0286055	-0.817821	-0.283331	-0.302776	-0.169184	0.292826	-0.34506	-0.234625	0.294985	-0.1909	1.22232	-1.13906	-1.80475
3.48051	1.84248	-0.769827	-2.30346	1.37554	-6.5368	0	-0.803755	1.16851	-0.150038	1.21294	-0.462364	-0.0315308	-0.378072	-0.181587	0.437637	0.0292886	0.127608	0.294118	-0.255102	0.542691	-1.06743	1.38869
1.21464	-0.241643	-2.8215	0.334097	-0.273598	-1.41973	0	-1.14983	-1.82889	-5.71584	-0.870311	-1.44006	-0.918746	-0.108284	-0.036357	-0.145666	-1.6297	-0.663893	-1.1817	-0.255755	-0.530037	-2.4008	-2.33625
-1.91642	-3.46505	1.10673	-0.14835	0	-2.85037	-0.21164	-0.819677	0.330735	0.158856	-2.58905	-1.46449	-1.89564	-0.271223	-0.30349	0.581397	-1.37264	-1.09046	-1.19583	-0.642263	-1.19655	0	-1.05612
-0.503701	0.614638	1.56009	0.44439	0	-2.19415	1.68071	0.410678	0	-0.956945	-4.0493	-2.63647	-2.72909	0.386271	-0.670939	1.15275	-0.374895	0.28182	-0.301205	-1.42767	0.523662	1.66384	-0.033184
1.87459	0.146698	0	-1.26427	-1.37933	-3.32447	-1.04713	-1.09891	1.59105	0.479617	-0.641713	0.640639	-0.736035	0.182451	-0.959299	0	0	-0.131336	0	0	0	0	-0.499086
-0.711285	0.254615	1.38357	-1.4575	-0.557105	-2.50817	-1.91292	-1.88224	-2.68188	0.318472	-0.74876	1.33383	0.368695	0.229281	-0.818965	0	-0.741825	-2.45979	-4.63046	-1.05126	-0.792944	-1.25968	-2.39674
0.373545	-0.363023	-2.94367	-0.443966	0	0.732386	-0.645858	-0.706218	-0.0476985	-2.41363	-0.340329	0.299289	-0.0334616	0.0875274	-0.36198	0.428878	-0.336238	-0.282946	-2.88482	-0.995694	-0.76046	-0.926201	-0.239439
0.126838	2.19609	-3.19516	-0.31833	-0.560226	2.89002	2.97894	2.6575	0.143027	0.325204	0.309438	-0.0577475	-0.503272	0.288969	-0.288022	0.427047	0.513072	0.13875	0.809721	-0.60221	0.168056	-0.145497	0.102687
-0.716978	-0.256242	-1.30721	-5.23611	0	1.56121	-3.19516	-4.30098	-0.957403	0	-1.10807	0.0577475	-0.742745	-0.208242	-0.225989	-0.712761	-1.27531	-0.298456	-2.4491	-1.62385	-0.103386	0.145497	-0.997086
-2.73744	0.100075	0.328408	-3.86349	-1.12996	-4.81527	-0.216685	-1.4514	0.144196	-0.978801	-1.34188	0.55201	-1.77782	-0.749219	-0.264301	-0.143164	-2.53716	-1.67842	-0.497101	-1.23543	-2.1301	-1.87854	-2.05977
0.74577	0.784611	2.10876	-0.153771	-0.855925	-2.08169	0	2.02612	0.67018	2.74876	-0.826626	-2.08163	0.241172	-0.0609942	-0.227101	0.428878	-1.29955	-0.6555	0	0.0690369	0.789374	0.708595	-0.814596
1.0306	-0.0186098	3.93442	0.488453	0.286123	-1.02968	0	0.64263	1.27994	4.06306	-1.27445	-1.24566	-0.829307	-0.067815	0.239702	0.142552	-1.32965	-0.739609	-2.01349	-1.52993	0.535844	0.0588235	-1.36057
-2.07149	0.624635	0.921666	-3.02454	2.25998	-6.03367	4.45461	1.13235	0.610474	3.1653	-0.269818	-1.50564	-1.36247	0.257453	0.653105	0.709726	-0.00649794	2.13086	2.01349	1.52993	-0.33947	1.11112	1.9633
1.31636	-0.135727	1.51748	-0.431407	0.27894	-3.45328	-2.3086	-1.99012	-1.79504	6.18457	-1.10847	0.427963	-0.387666	0.39842	1.15752	1.12519	0.0974247	1.32767	0.497101	0.481929	2.071	-2.17528	1.33429
-1.13229	-1.93237	-0.452831	1.98337	0.278164	4.72235	0	0.4298	-0.334209	-1.12203	1.15169	1.80475	1.19342	2.0545	1.48624	0.696867	1.13608	-0.337815	0.98685	0.137268	-0.797432	2.1171	-1.5466
-2.39859	0.0251731	-5.44035	-0.0706664	0.554018	1.45654	-2.14601	-2.0947	-2.56735	-1.99437	-1.22821	-0.964778	-0.454626	0.520234	1.46447	-0.417537	0.0256706	-0.0339702	0.163532	0	-1.03843	-1.67233	1.12717
-2.50095	-3.08641	0.478089	-3.70119	-2.23473	-4.81555	0	-1.32258	-1.18461	-2.91992	-2.25623	-1.93652	-0.950879	0.0853494	1.15871	-1.54606	-2.71887	-3.0102	-0.820349	-1.93912	-0.785962	-0.86169	-4.58697
-0.00904662	0.408018	-3.89028	-4.07242	-2.57525	5.40111	1.50703	0.883658	0.198413	-1.19226	1.0681	-0.200021	0.176772	0.0590454	0.816138	0.141543	0.951544	1.8992	-1.15991	0.0699056	0.576975	2.03817	3.74279
-0.25908	-0.142294	-0.165426	3.67551	-5.97192	0.671539	0	0.438918	0.0990589	0	0.309393	0.364026	-0.212164	-0.0918635	0.458366	0	0.202264	-0.353085	-1.68071	-0.560618	0	-0.292826	-0.106026
0.148193	0	0	-0.442871	0	0	0	0	-0.247832	0	0	0.298794	0	0	0	-0.425231	0.53954	0.572338	1.84724	1.04859	0.508641	-0.293686	0
-0.387487	-0.506133	-2.68473	0	1.52675	1.50741	0	0.437	-0.248447	-3.35397	0.121286	0.549014	-0.425684	-0.0525314	-0.0234549	0.707717	-0.422284	0.117373	1.15799	-0.208841	-1.30943	-2.68272	-1.20955
-1.83333	-1.2503	-0.51151	-1.19067	0	-0.572908	0	-0.802631	-0.398804	0	-3.31609	-1.85029	-2.81201	-0.00656836	-0.328948	-1.13476	-2.59858	-1.60497	-1.15799	-1.75751	0.525833	-1.5221	0.0715564
0.522313	-1.43305	-0.51414	-2.93223	-12.5769	0.660875	-3.92207	-1.99785	-0.2	-1.40518	-1.4572	-5.27886	-0.992108	-0.078854	-0.554606	0	-0.656971	0.901855	1.6502	-0.35524	-0.328321	-0.430373	-0.717878
-0.92921	-1.68468	-0.516797	0.706717	3.3787	-0.0447458	0	-0.224467	-1.46209	-3.68336	-3.94889	-0.48673	-2.65684	0.118258	-0.545801	0.568992	-0.823939	2.85096	-0.656817	0.142248	-0.9118	-0.804211	3.15573
2.92254	0.0339732	2.22042	-4.65346	1.32015	-0.176092	0.221976	-0.300075	-0.867131	1.13545	0.933468	2.2837	-0.418013	1.26576	0.0475794	0	0	0	0	0	0	0	-1.83168
0	-0.572287	0.168776	0	0.978801	2.69367	1.10255	0.82305	0.357965	0.643089	0.42791	0.282759	0.228224	-0.259673	0.781809	0	0	0	0	0	0	0	0.814308
2.31944	-0.232574	3.31705	-2.66552	0.324149	1.40473	3.02399	2.64721	3.36293	-0.481929	0.873884	0.311596	1.69528	0.0259977	0.904452	0.141743	0.453331	1.56403	2.11907	3.56059	0.225419	0	4.78494
0.663078	-0.480539	1.29661	4.82331	1.60517	-0.63566	2.52114	3.00237	-0.89242	3.63676	-0.317965	-1.18102	-0.825211	0.570245	1.35883	0	1.09437	-2.75332	1.44118	0.547197	0.27776	3.02822	-4.22235
-0.44978	-0.372286	0.961546	5.9858	1.8928	-2.01994	0	-0.140944	0.84305	-2.19789	-0.829094	0.991953	1.01181	0.245241	1.43162	0.846267	-2.77589	-0.370593	-2.57663	-3.39956	-0.782342	1.96904	-0.492092
-0.358106	-0.825333	-0.961546	-1.48945	0.933133	-0.390876	0.826451	-0.141143	1.37324	1.26185	-1.80012	-1.78586	-2.56812	-0.50404	1.3329	0.280505	1.70176	-0.0945984	1.61816	2.44	-2.72585	2.19147	0.316623
2.23901	-0.467698	-1.13362	3.26252	-2.50797	-4.2279	1.02355	0.703733	-0.73332	-2.05866	0.928109	0.763923	0.49609	0.18123	1.02702	-0.561799	-0.358363	1.56197	0.160385	-0.621764	1.06138	-0.725166	1.67193
0.796069	-0.210128	1.29452	0.709172	-1.27797	1.08569	-2.05769	-1.76871	0	0.159872	-0.952331	-0.0825083	-0.57263	0.0129324	1.1045	-0.848661	-0.0745384	0.706879	0.160128	1.17122	-0.257505	-1.14187	-0.0345483
0.0843985	-1.22043	-1.29452	-0.709172	3.16482	-1.26779	0	-1.58277	-2.23279	1.11201	1.52656	1.76647	1.10414	-0.401685	1.11416	-0.855925	0.399148	-0.0209734	-0.080032	1.69783	0.311632	-2.05273	-1.28675
-0.76691	0.22687	0.48741	4.26504	0	-0.548298	-3.16816	-0.363241	2.86864	-1.75303	0.238294	-1.12321	0.377929	-0.0974247	1.15558	-1.15275	1.25134	0.403889	1.19381	0.537275	-0.801363	1.28417	0.244713
-2.42019	0.0141623	3.50354	2.44719	0.62112	1.54577	0.641713	0.580553	-0.195217	3.47586	-0.920564	-2.56763	-1.1381	0.27255	1.153	0.289436	-0.006668	-0.276266	-0.634923	-0.604637	-0.0136379	-1.19404	0.487636
1.62865	3.15717	2.01401	-4.88445	2.44661	3.41253	0	3.34432	3.64549	2.90763	0.87295	-0.36402	0.798028	-0.350559	1.09787	0.719946	1.34128	0.169296	0.950879	0.13468	-0.27315	2.60833	-1.22358
-2.20415	-2.46566	-0.924506	2.99243	2.68272	1.72749	0	0.836242	0.797565	0.900907	-3.55081	-2.55442	-1.83351	-0.260468	1.69681	-0.431345	-0.832457	-1.20047	-1.58986	-1.83367	-0.837744	0.641589	0
-1.20424	2.30774	-5.89812	-3.22087	0	-1.07637	3.35461	-0.626525	-0.986155	-0.299401	-3.96353	-3.85389	-2.49818	-0.0847983	2.13437	-0.2886	-2.60785	-1.78443	-1.12813	-0.137174	-1.90747	-4.45839	-4.4228
-1.65402	-2.10403	0.9804	-6.64844	-3.28879	0.173121	0	0.27894	-4.88374	1.93028	1.80621	1.8893	1.06154	-0.228661	1.5341	-0.434468	-0.347898	-1.02172	-1.46941	-1.52147	-0.196989	0.757006	-1.74304
0.13443	1.46985	6.14851	3.06883	4.45839	-0.476043	1.63603	2.61183	0.592887	6.40789	-0.721111	2.02758	-0.627699	-0.946317	0.911258	-0.145243	0.392151	0.625481	-0.32949	-0.0697107	-0.028173	-0.939543	2.7308
1.91798	3.98562	1.81823	1.79127	5.65122	-3.5362	0	-0.476029	1.27266	0.550208	0.733716	-0.592091	1.44562	-0.802152	0.580054	-0.291121	0.390619	-0.0954836	-0.745345	-0.0697593	-0.282167	-0.764179	-1.83694
3.21987	-0.827388	0.449439	-4.41806	2.71019	2.04791	-0.203046	-0.136426	3.489	0.547197	1.16535	-1.49173	0.849754	-0.473697	0.761722	0	0.611726	-0.012738	-3.81241	-1.75999	0.563541	-0.27654	-0.408695
0.165237	-0.456652	-0.299401	-0.80935	-2.9853	0.703132	1.01113	-0.341881	-1.60988	-0.136519	-3.22833	-1.9969	-1.47232	-1.31944	0.281731	1.30342	-0.378085	-0.906003	-0.519482	-0.427047	-1.22978	-0.215617	-1.7653
2.59466	3.08186	0	1.09791	-3.93309	6.35768	0	2.70287	2.31197	2.02847	9.00091	5.99468	6.0946	0.0609694	-0.418024	1.85322	3.97838	2.63367	0.346621	1.83751	1.56639	3.12668	4.04733
0.23828	1.57351	3.67959	2.41228	0.57143	-3.7207	3.75167	0.399202	0.650862	1.85682	-1.56438	0.135044	-1.74111	-0.413967	-0.527448	0	-0.743813	0.0525729	0.345423	0.906245	-0.0280073	0.179158	0.399492
1.30901	2.46848	2.98955	0.766852	5.81076	2.82415	1.53849	2.36231	2.1092	3.48647	4.69	3.39645	2.982	0.725009	-0.343356	-0.851069	2.41022	1.30233	1.87879	2.33207	2.20246	3.11332	2.75263
-0.817796	-0.47121	0	0.629716	0	0	0	0	0.226603	0	0	-0.556875	0	0	0	0.568183	-1.24153	-0.160707	1.67789	0.675678	-1.10209	-2.10411	0
0.190121	0.433595	4.79216	0	2.12774	3.23514	0	3.87966	0.226091	4.58853	-0.720621	1.73142	0.0362647	0.686271	-0.383991	0	-0.32417	-0.480569	-2.1868	-1.15138	0.868911	-1.36785	-2.31863
-2.59464	-2.05252	-1.88939	0	2.59755	1.54171	4.84266	-2.78323	1.34592	-3.70413	-3.19598	-1.63777	-1.79262	-2.01836	-0.464726	-0.283688	-2.16629	-1.34226	-1.88847	-1.23374	-2.48883	-3.34887	-2.26287
2.73679	1.17712	4.78815	-4.76886	-2.07261	1.45134	0	4.51487	2.11648	2.4846	1.83211	2.99873	1.24726	0.307409	-0.238143	0	0.327951	0.00944927	0.862818	-0.622624	1.35638	1.53613	1.06482
-0.231717	0.85659	-2.36542	-0.183908	4.10314	-0.794663	2.15836	0.550292	-0.481086	-1.23458	-2.3669	-0.385918	-0.7318	-1.51888	-0.0795071	-0.284495	-0.906968	-0.144987	0.51414	0.553635	-0.836825	-2.15725	-1.13867
-0.48188	0.737319	-2.15062	-0.384232	-1.51902	-2.37178	-0.356507	-2.97052	1.22006	0.742578	2.3087	1.20379	1.5668	-0.458111	-0.159204	-0.57143	0.758033	-0.665851	-1.55042	-2.02168	-0.280505	0.311042	0.184536
-4.77165	-1.49275	3.47164	0.843369	-3.37256	-1.22661	0.178412	0.0627944	-1.6154	2.43617	0.162885	0.893424	0.252753	-0.00695725	-0.579249	-0.863315	0.337268	-0.886638	-0.347826	-0.706717	-0.23905	-2.03929	0.441502
1.31923	1.85318	0.784318	-1.74051	1.83012	-1.24184	0.355872	1.43349	1.09434	0	1.30509	-0.142985	0.933244	-0.39038	-0.592699	-0.289436	1.77332	1.97049	1.21214	0.988011	0.994615	2.38032	0.256645
-0.788835	-0.385333	4.4565	3.7061	0.516797	-3.66168	1.93498	2.50548	0.13052	4.47133	1.43543	1.57226	1.13678	-1.85406	-0.464553	-0.290276	-0.181771	0.163827	0	-0.281294	0.222779	0.432366	0.0732064
-0.0311738	-1.03278	0.124456	0.894327	3.04592	-0.399856	0.521287	0.361446	-0.0869944	-1.04107	0.743749	-1.64383	0.211715	-0.628125	-0.751883	-0.437	-1.36074	-1.07636	0.343643	-0.0704473	-0.69784	-0.773399	-0.587158
0.200046	0.351715	1.72631	-3.31906	-0.501254	-1.39084	0	2.9623	0.564115	1.95746	0.905287	1.05757	1.53903	-0.193514	-1.39676	1.30531	0.607426	0.127979	-1.20795	-0.99151	-0.702744	0	-0.25797
1.4834	3.25066	1.33578	1.44676	0.501254	-2.90711	4.90377	2.76356	0.99032	4.13236	3.17557	0.268836	2.06122	-1.21257	-1.2279	0.860837	1.25886	0.564442	0.86431	0.709223	1.84466	-0.279894	0.88171
0.130751	-0.236974	1.19906	1.12758	0.995033	-2.03799	2.12253	1.63338	1.65714	-0.109469	-1.32366	-0.152016	-0.511336	-0.232643	-0.356619	0.285307	-2.50062	-0.482166	-0.690849	-0.495927	-1.09991	-0.65615	-0.10979
0.153835	-1.12567	-0.958091	0.283646	0.739831	-0.543882	-3.61882	-3.35163	-0.0421496	-4.02289	-4.22747	-2.18177	-3.51279	-1.94766	0.0525238	0	-1.94103	-0.278746	-2.10165	-1.07106	-1.02724	-2.21879	-0.919631
-0.918755	-2.88989	-2.93061	-0.763191	-3.75513	0.137054	-2.20161	-2.99055	-1.05956	-3.954	0.579382	-1.85032	0.106138	-0.0742446	0.104965	-0.428266	0.205925	0.0158587	0.70547	0.143472	-1.13799	0.956945	-0.853596
0.635465	-0.941662	0.494439	-1.14822	-4.16727	0.275152	3.20162	2.52732	0.509988	2.34477	0.587307	-2.2349	0.564176	0.0371292	0.220068	0.285714	0.363551	1.4671	-0.528636	0.0716589	0.428266	0.790518	1.66332
2.9862	-0.166347	-1.99259	-1.84026	2.62482	0.227915	-3.88891	-2.52732	-4.02216	-1.75341	0.673403	0.537201	0.805467	-0.185784	0.407418	-0.285714	0.3254	0.880569	0.879513	0.855925	0.284495	0	0.621233
1.14219	0.485469	2.11582	2.37069	-0.780238	-0.0448999	1.70944	1.59437	0.0441209	2.21583	0.813239	3.61669	0.764423	-0.193582	0.20829	0.428266	1.23158	0.164054	0.524019	0.141945	0.297851	0.0314911	0.10923
0.418844	0.66686	2.79314	0.0604412	1.81117	2.21438	1.84724	4.4681	0.834619	1.94181	-0.36681	0.920804	-0.555364	0.401637	-0.104091	1.97468	-0.304818	0.179223	1.21214	-0.0709471	0.24047	2.30325	2.05302
1.3809	-1.27406	-2.05694	-0.0151069	2.03053	-1.84935	0	-3.1297	-0.746436	-2.9853	-1.93395	-1.27556	-1.89746	0.140934	0.0208268	-0.84152	0.232011	0.104912	1.70653	1.26941	0	-2.39775	-0.035657
0.872742	-0.643172	-0.613123	0.181132	-1.26424	-2.11571	0	-0.987519	0	-1.17235	1.02785	2.32269	1.09368	0.140736	-0.104178	-0.564973	-1.7803	-1.09526	-0.849623	-2.3397	-0.282966	-2.00548	-2.63791
-1.0059	-0.582413	-1.23764	-0.787286	-2.8389	0.786906	0	-2.00478	-2.00318	-1.54489	-2.00903	1.85347	-0.668899	0.56833	-0.417799	-0.141743	-1.30255	-0.599829	-1.80806	-0.21544	-1.12561	-1.94811	-0.735027
0.93205	0.349855	1.48334	0.530586	0.261438	2.59443	0	0.237954	-0.225073	3.2983	4.68118	2.38507	3.30063	0.462607	-0.272508	0.565772	1.6054	0.447554	-0.435351	-0.0719166	-0.560387	2.33322	2.29728
-0.0407828	1.16381	-0.862605	4.10276	1.29704	-1.22089	-4.24873	-3.07717	-0.769061	0.115808	0.979866	0.730869	0.170736	0.58437	-0.473411	0.140944	0.696424	0.706365	0.522194	0.430726	2.39191	1.24146	0.575127
1.61887	-1.47473	-0.745345	2.80459	-0.776201	0.544813	-1.22272	-1.85534	-1.64839	-0.115808	1.48406	1.23301	1.69152	0.0946384	-0.687797	-0.42343	1.16433	-0.142737	1.55042	0.99787	0.140588	-0.348598	0.74987
0.634991	-1.15495	1.85305	-0.155334	-0.782273	1.52615	0	0.993797	-1.44155	1.03747	-0.310045	-0.567709	0.668675	-0.481401	-0.457618	0.98523	-0.393226	0.297656	0	-0.568992	-0.846506	-0.0635122	-0.142399
0.00750228	-1.76117	0.853144	0.844362	1.30041	-2.07096	0	3.16328	-1.55774	1.59275	0	1.50239	1.42269	0.284744	-0.138763	0.27972	-0.275185	-0.0136232	0	0.639888	-0.825158	-1.53652	-0.0356316
-0.759791	-0.327836	-2.20868	0.0840454	2.29895	-3.09519	4.63602	0.597017	-0.285851	-3.21129	-0.483015	-1.70353	-0.890948	-0.197044	-0.0320496	-0.27972	-0.616104	0.418376	-1.2038	-0.854098	-0.271798	-0.647251	0.213599
-2.16166	-1.30862	-1.87858	-3.86832	-0.252845	-1.94313	-2.89382	-2.227	-1.58695	-3.31784	-0.193861	-0.588979	-0.332006	0.872796	-0.321062	0.69784	-1.36555	-0.293359	0.517689	0.142857	0.271798	-0.16247	-1.00072
1.85364	-0.927701	0	-2.31148	-3.60864	0	0	0.303859	-0.0484848	-2.06946	0.687583	0.269678	0.563755	-0.00724192	-0.526628	-0.139179	0.297569	-0.99204	-0.690849	-0.0714031	-0.286123	0.615985	-0.21575
-0.0483004	-0.694567	1.87858	0.416172	-0.526317	4.53709	2.55768	2.16095	0.338901	0.857323	1.01199	2.82784	1.76996	0.260379	-0.529416	0.555557	-0.395826	0.277593	-0.173461	0	-1.44303	-1.10498	0.21575
-1.39517	-1.06842	0.618431	1.6038	1.83012	-1.19673	0	-0.416543	-0.193517	2.29064	1.3789	-0.229343	0.550787	-0.0433495	-0.510455	-0.277393	0.91445	0.645768	0.519482	0	0.333745	1.45988	1.21387
1.28211	0.494	0.246306	-0.570886	1.79722	0.185047	1.17156	1.24446	-0.0968992	1.77205	0.354795	-2.16182	-0.453369	0.324664	-0.283503	-0.836825	1.19866	0.0408411	2.22042	3.85337	0.879792	0.674052	-0.498044
-1.74962	1.04944	1.9489	0.410197	0.25413	2.4636	0	2.15563	1.25242	1.16416	0.0312451	0.334616	-0.129912	0	-0.602378	-0.280505	-1.14157	0.169374	1.00841	0.479946	-0.302006	-0.513151	1.76745
1.19406	-0.00686837	2.3839	2.18359	0	3.93266	0	2.61676	-3.06221	2.40149	0.540037	1.53813	0.970253	0.674805	-0.727677	-0.140548	2.09289	1.25271	2.96562	2.83229	1.58609	1.75303	2.4231
0.668617	-1.25797	-0.117855	3.34771	3.24623	5.72615	3.75554	-0.281136	0.443241	-0.453002	0.351531	1.41434	0.353414	-0.0930532	-0.833384	-0.422834	-0.0723518	0.0963244	1.92932	0.926545	0.410271	1.59853	0.613708
-2.72633	0.402611	-2.50759	-0.388081	-0.246003	-2.61248	0.216112	-1.3035	-1.38547	-2.52887	-1.05832	-0.198042	-0.160488	0.307462	-1.08825	-0.424629	1.01471	1.94969	1.57981	1.43887	0.464822	2.42678	4.29136
0	0.882825	-0.728159	-0.166783	-1.23917	-0.927387	0	0.965094	-0.149589	-0.81824	-0.0939212	-1.12095	-0.353983	0.0785013	-0.895139	0.283286	-0.63708	-0.250704	0.780644	-0.194995	0.294675	0	-0.522365
3.6737	1.97851	-1.10228	-2.05179	0.249066	-3.58182	1.57071	-0.737174	-0.0998502	-1.18065	-0.250889	5.44269	0.514471	-0.171355	-1.16773	0	0	0.0568973	0	0	0	0	2.90343
3.54503	0.342754	-0.370142	1.28379	-1.25158	0.175704	-0.457558	-0.0569314	2.46682	-2.16095	0.792331	-1.14251	0.0961693	0.192754	-1.23981	-0.567377	-0.436861	0.0478884	-0.467655	-1.04645	-1.6102	-1.37512	-1.89381
0.30378	-0.309098	2.20058	-0.534084	-1.01267	1.43714	2.43705	0.737592	-1.72037	3.69309	-0.834207	-1.70819	0.0960769	0.149663	-1.13738	0.990808	-0.435472	-0.826893	-0.941922	-0.197433	0.850707	0.30722	-0.357085
0.926204	-1.37559	-1.09424	1.44109	3.25435	1.33143	0	0.9004	0.198118	-0.234192	-0.936307	-0.648977	0.064	-0.256703	-1.80871	0.561799	-0.062838	-0.159433	0	0.263158	-0.679986	-2.01401	-1.24347
-0.176245	0.0954784	-1.23003	0.415859	-1.48886	1.48085	0.814637	-0.392928	0.247097	-0.587891	1.94689	0.987852	1.52384	-0.0714235	-1.68315	0.27972	0.652907	1.19258	-1.75024	-0.329056	1.17291	-0.156617	3.01628
-1.39444	0.313075	0	0.414136	0	0	2.57655	0	-0.942234	0	0	-4.01467	0	0	0	-0.419875	0.896544	1.16259	0.958474	1.69939	0.280584	1.67862	0
-0.361857	0.135814	0.862605	0	0	1.80045	-0.944322	-0.394478	-1.00151	-1.06699	-1.17826	5.2895	-1.01331	0.726137	-1.97318	0.698815	-0.571682	0.00118064	1.4207	0.710368	0.698034	-1.67862	2.52379
3.45481	-2.14	-1.98272	-2.0318	0	2.84652	-1.56336	-1.19286	-1.77715	1.42014	0.0314614	0.468414	-0.766777	-0.120657	-2.12734	0.139179	1.30193	-0.00590336	0.469117	0.641439	1.10682	0.936044	0.559181
0.983733	-1.12247	0.499377	-0.239285	-2.02027	0.322102	-0.0382512	-0.171576	-0.874716	2.20811	0.219953	2.06116	0	0.333227	-1.68071	-0.418119	-0.48949	0.661952	0.466927	0.891158	0.30224	-0.248756	0.986444
-0.343687	1.78582	0.496895	0.995591	1.01524	1.89184	0	-0.631641	2.04611	1.4832	0.864634	3.15423	0.83041	0.367388	-2.26375	0.139567	3.39286	1.85409	0.464757	0.946081	3.05305	2.70287	2.96184
-0.649331	4.04252	-2.12907	0.125497	0	-0.417018	-0.775823	-1.15876	0.806863	-1.71335	0.114031	1.98663	0.0953744	0.779745	-2.04566	0	1.1959	-0.28768	2.14075	0	1.34798	1.65293	0.297354
-0.963595	1.99725	-0.38047	-0.980263	-1.01524	-2.23744	-3.68521	-0.467291	0.100402	-0.577702	0.526997	0.494906	0.8543	-0.175088	-2.68325	0.278552	0.26348	0.0369432	2.09589	0.812758	1.2523	0.297619	-0.386733
0.372805	0.278398	-1.15017	-1.0184	0.254777	2.05324	1.53077	2.60055	1.34565	0.577702	-0.0103066	-1.50982	0.753299	0.0490557	-1.28475	0.277778	0.0557069	-0.0935389	0.44346	2.33857	0.0518403	-1.04557	-1.71355
-0.484242	0.335636	0.384863	-2.15557	-0.254777	1.62941	-1.24794	0.0570288	0.0989609	1.37302	1.31069	-5.66781	0	0.202975	-1.38695	0.553252	-0.260231	0.138545	0.881063	0.908271	1.4024	0.598804	0
0.968382	1.0831	1.01912	0.130653	1.01524	1.69987	-0.844455	-0.858866	1.42404	2.46926	0.648958	0.140307	1.02661	0.0838692	-1.18989	-0.414652	3.69489	2.32974	2.59755	2.2647	6.83879	5.93947	4.53478
-2.08357	-1.78794	-4.5374	3.50663	1.25472	-2.28121	-3.26128	-4.83015	0.194837	-5.00104	-2.4867	-2.46669	-2.9206	-0.279838	-1.08752	-0.416378	-0.959434	-0.18898	-1.57936	-0.0589449	-3.91778	2.47269	-0.0869691
-1.73931	0.0454147	-1.06668	-1.78071	-2.78147	-2.08482	-1.42321	-1.82709	-2.96318	-2.3586	-1.31416	-1.23714	-0.864144	-0.00700599	-0.922745	-0.978345	0.331465	0.0197609	-1.45775	-1.60479	1.84416	-2.21985	-0.174166
0.277743	-1.29261	2.25324	1.00732	-2.86105	-0.037827	0.822912	2.0682	-2.33276	2.12523	-3.50426	-0.805095	-2.47328	0	-0.412858	0.280505	0.357352	0.0254011	-1.03322	-2.18058	-1.20099	-0.365426	0.434846
-0.626397	-1.87702	-1.45217	0.492855	0.526317	-0.180927	-1.90804	-3.30507	1.22388	-0.233918	0.184672	2.4788	1.89301	-0.0140135	-0.0739044	0.139958	-0.92755	-0.52684	-1.64551	-0.799266	-2.1182	0.785418	0.404158
0.148356	2.06084	0	-1.71429	-0.790518	-0.536285	0.0852007	0.0622084	0.757388	4.35349	0.541185	3.33025	0.933233	-0.23853	0.692554	-0.280112	0.169287	0.542077	1.34834	1.34889	1.00239	1.55257	-0.230747
-2.85749	-0.466753	-0.533335	-2.87018	0.790518	-5.35436	0.831147	-0.436274	0.801607	-4.11958	-1.04168	-3.41296	-1.19222	0.511438	1.21143	0.140154	-1.2247	-0.445102	-5.50598	-2.09238	-1.04017	-1.10651	-1.89482
1.21492	1.28324	-0.133779	-1.10907	1.56253	-2.83768	-2.7399	0	2.02526	-0.585825	-0.667581	1.95692	0.420508	0.0768398	2.03913	-1.26852	1.15218	0.43438	0.783089	1.54276	0.389766	2.33688	0.440465
-0.480404	-1.84491	-2.71387	-0.178598	0.258065	-1.18498	-1.92819	-2.59426	-1.57716	-2.01787	-1.27081	4.85747	0	0.202295	1.43948	-1.57258	-1.8179	-1.67891	-2.68791	-0.737557	-1.30093	-1.8928	-1.23822
0.736621	2.3122	-1.24569	-1.94035	-0.776201	1.44505	-0.177148	-0.128287	0.0496648	-1.81493	2.16718	2.19628	1.91822	-0.237215	1.94262	-0.723069	0.711572	1.39123	1.58986	1.89434	-1.33096	1.59344	2.4613
0.89707	-0.415261	5.42138	0.756548	-1.83491	0	2.10534	1.90724	0.0496401	5.69549	0.315098	6.35984	-0.444304	-0.0768666	1.62206	0.289855	0.384346	0.432617	1.25393	0.963863	2.01259	0.706141	0.086793
-2.72931	1.44593	0	-1.38122	0.790518	-1.35828	0	-2.68044	-0.298211	-2.09798	0.28166	-9.52692	0	0.118769	1.50298	0.289018	1.08103	0.160484	1.23841	0.59773	-0.313631	1.3708	0.404041
1.45279	2.64355	0	0.806763	-1.05542	1.92352	-4.25596	-1.82773	6.78308	-2.26335	-0.607641	-4.6007	-0.127307	-0.0558737	1.37568	1.00503	0.294719	0.0776157	-0.617286	0	-1.1337	-1.50621	0.172662
-2.29817	-0.262484	-0.396564	0.920553	-1.87422	0.173045	-0.362977	0.0658545	0.0465008	0.360794	-4.09898	-2.32754	-2.12432	-0.153814	0.88936	0.427656	-0.478607	0.0151786	0.924506	0.416296	-1.15966	0.40568	0.028748
-1.39929	-3.24999	0	0.434686	0.807541	0.172746	0	1.30806	0.185787	-0.481349	3.89197	4.38991	3.57866	0.286463	1.24225	-0.570615	0.12062	0.71974	1.5221	0.886269	2.34401	0.806456	0.287027
-0.372701	-3.17216	-1.19921	0.0896995	2.1221	-0.389858	0	-0.0649984	-0.325355	-1.58058	-2.00491	0.898049	-0.724527	0.27173	1.17618	0.142959	-0.00602755	-0.353902	0.752449	0.644974	-1.14593	-2.02847	-0.574879
0.0516876	-0.0467212	-1.34955	-0.855412	0	-2.05461	1.2647	-0.0650407	-0.607053	0.610875	-0.490799	-2.83165	-0.0316206	0.0695555	1.0368	0.427656	-1.3808	-0.503655	-2.27455	-1.70944	-0.436346	-1.23713	-1.9209
1.1365	-1.41865	0	0	-1.05542	-0.977534	0	0	0.0468274	0.243309	3.28872	0.862613	1.38193	-0.264569	1.20031	0	-0.505477	-0.717456	1.21953	0.769918	-1.26846	-0.805448	-0.826207
-1.56146	-0.475125	-0.681666	0.586071	2.87602	-0.716984	0	-1.83853	-0.657588	0.726395	-1.285	-0.202483	0.31143	0.0836237	0.730608	0	0.303593	-0.0538755	-1.52675	-1.42605	-0.0260552	-1.43241	0.384445
-0.835022	-1.38387	5.06775	0.284282	1.53456	1.73795	0	1.70832	-4.08809	4.25094	1.03583	-1.47644	1.29752	-0.16034	0.896647	0.425835	0.941693	0.517703	-0.153965	0.59666	-1.29829	0.282486	0.588583
0.626816	0.22739	-2.7688	0	1.26105	-0.354208	0	-1.70832	-1.88311	-3.41009	-0.391262	-3.53988	-1.23535	0.132473	0.609535	-1.28298	-1.34669	-0.477436	0.153965	-0.178625	-0.542652	-3.73607	-1.15096
-0.659216	-0.628303	-2.02573	-1.06648	0.749067	-0.310184	-1.81164	-2.0081	-1.00554	-0.961546	0.0108891	-1.25373	-0.404796	0.340834	0.436576	0.143369	-0.44678	-1.66903	-2.02027	-2.22968	-0.599003	0.117062	-2.86035
2.38346	0.628303	0.408442	1.69204	-1.00001	0.443936	-0.91828	0.202634	1.45475	-0.120846	0.250122	-1.57273	-0.375118	0.145717	0.410579	0.855925	0.326808	0.569763	0.31348	-0.060957	-2.55575	-0.969883	0.700049
-1.10092	-0.572909	0.946593	3.81637	1.24846	3.13644	0.735297	1.00706	-0.149514	1.32134	-0.0325892	-2.00995	-0.0939997	0.11088	0.276792	0.425231	1.16287	0.253079	0.624027	0.970881	2.43551	1.46587	0.665057
1.85303	-1.4152	1.99873	4.19818	0.74166	-1.99289	0	2.37635	-1.65958	1.06826	-0.0434688	-2.65009	0.187911	0.400913	0.335933	0.564176	0	-0.280601	0.620157	-0.54496	0.280318	0.811599	-0.36221
1.87188	1.5812	0.394997	-0.329444	-0.493828	-0.878139	1.45457	-0.720134	2.05779	0.588583	-2.19789	-2.02748	-2.0867	-0.110436	0.29899	-0.847463	-2.55144	-0.533016	-1.4008	-0.853664	-0.950921	-2.15941	-2.91476
1.26828	1.35225	-0.263158	-1.13386	0	-0.932847	0	0.850512	-0.848097	0.701757	-1.90696	-1.16791	-1.6753	0.158714	0.464646	0.283286	-0.783335	-0.510372	-2.37918	-1.60497	-1.09601	-2.14677	0.898813
-0.659619	-1.67066	-0.528403	0.0556096	0.493828	-1.03012	2.31946	0.454989	-2.0755	-1.17235	-1.88631	-1.41455	-1.27515	0.0689275	0.628001	-0.567377	-1.51504	-0.843789	-3.59516	-1.88448	-0.545704	-1.42664	-1.71157
-3.53532	-0.242946	-0.265252	-3.49325	-2.49389	-0.22473	2.09432	1.03227	0.204395	1.75341	-1.4648	-1.0041	-0.032911	0.0757654	0.247744	0.425835	-0.172607	-0.346556	-0.166528	0	-0.548698	0.274767	-0.566574
0.0837848	0.298394	-1.7415	-2.28556	0.252207	1.56728	0	-0.385853	-0.768643	-1.28282	0.233946	2.05316	0.754226	-0.227469	0.188346	-0.710735	-0.00639857	0.549715	0.82988	-0.317561	0.835564	-1.66004	1.34819
-0.630513	-1.57132	-0.677969	0.0588841	0.251572	-0.490964	0.516797	-0.193486	-0.878332	-1.06196	0.291664	0.215805	1.16922	0.0069006	0.223201	-0.859604	0.0735588	0.0110802	-0.165426	-0.702205	0.0136398	-0.777972	0.404041
-1.32862	1.45345	0	-0.324293	0.501254	-3.49782	0	0	0.207361	0	-0.373483	1.65239	0.193548	0.268753	0.0234659	0.143781	-1.55297	-0.4717	-1.83798	-1.41938	-1.15228	-0.218921	-1.37416
1.19679	-1.53795	0	0.309575	-0.501254	-0.648137	-1.03628	0	0.773798	0	0.151896	0.573376	-1.00406	-0.103281	-0.446797	0.286944	0.298285	0.308873	0.0842815	0.389106	-0.80344	0.499689	0
0.191539	-1.41897	2.55219	-2.12727	0.250941	-0.889449	0.692044	-0.907918	0	0.709223	0.674892	-0.663263	-0.293399	-0.151672	-0.425131	0	0.465102	0.704837	2.08428	1.60517	1.23023	0.89937	1.68386
1.0862	-0.250403	-0.398672	-1.28624	0	-0.391429	0	1.93554	-0.773798	0.470036	0.946452	-3.93243	-0.327011	-0.138083	-0.617286	-0.286944	0.856694	-0.394586	1.31149	0.317965	0.438657	0.646256	0.0618238
0.871849	0.564307	-1.74618	0.258575	-2.28147	0.376592	0	-3.24704	0.464997	-0.117302	-2.50086	-2.16331	-3.16113	-0.0276396	-0.549255	-0.431966	-2.10833	-2.12145	-0.982005	-1.47109	-0.260221	-2.01401	-3.20279
-0.273421	-2.07276	-0.407333	0.257908	-3.39016	0.558964	-2.09067	-1.26206	-0.413224	0.234467	0.867837	2.0585	0.908638	-0.477989	-0.54025	0.431966	-0.254835	0.160456	-1.65841	-0.516797	-0.867714	-0.470589	-1.05855
0.644813	-0.524974	0.542742	0.0605877	-2.41622	2.89074	0.701757	0.666225	1.59182	1.16416	3.42051	6.37658	2.15418	0.0763544	-0.301405	-0.143781	0.658626	0.544815	3.12783	-0.0647878	0.551802	1.09462	1.37712
-2.53818	1.19901	0.405132	0.151309	0.542007	0.222731	-0.174978	-0.800004	-2.94671	2.85245	-4.7606	-2.931	-3.16429	0.0277508	-0.132906	-0.577202	-1.22288	0.870261	0	0.838985	-0.551802	-0.49891	0.634118
-2.25752	0.252498	-0.405132	-0.72838	1.3423	-0.278492	-1.2335	-0.671594	-0.631581	0.112423	0.672291	1.86057	-0.305033	0.173268	-0.266344	0.433214	0.387445	0.496409	-0.813674	-0.774197	0.303868	1.02629	1.72337
0.950986	-0.397069	-0.13541	-0.841176	-0.267023	-1.94221	-2.33194	-2.94038	0.945882	-1.69976	1.18026	5.79572	1.88304	-0.166332	-0.169862	0.28777	-0.799517	0.866585	0	0.966814	0.550132	-1.30802	1.32698
0.339408	1.37933	-2.8868	0.4597	0	-0.861624	-3.88578	-3.24429	1.35067	-3.37045	-0.605921	-0.993692	-0.200067	-0.159661	-0.133665	0	0.881411	0.0109726	-0.163532	0.511837	2.38526	0.780644	-1.14076
0.14924	-3.59555	0.69493	0	2.37792	3.06803	-0.188857	0	0.154679	-0.118273	-0.2106	0.223177	-1.58119	-0.257382	-0.267868	-0.143781	0.509505	-0.0306108	0.977206	1.14214	0.0267809	-0.155642	1.3857
3.01835	0.184727	0.276625	2.35696	-2.37792	2.66457	0	0.998582	-0.672011	-0.236967	1.09494	-1.61055	1.21336	-0.244081	-0.195265	0.287357	-0.558633	-0.269548	4.12757	-0.126263	1.58069	0.652075	0.274851
0.819906	0.132792	-0.554018	0.980691	1.06384	3.08129	0.753299	-0.998582	-0.990365	-0.356507	-1.01299	-0.474815	-1.21336	-0.0139655	-0.465288	-0.431345	-0.00982849	-0.516248	-0.624027	-0.316356	-0.515295	-1.52818	-0.857586
-3.04947	-0.206642	0.82988	2.78505	-0.796817	0.882972	-1.70297	-1.7354	0.522467	-1.43887	1.35993	-0.314341	1.24686	0.19534	-0.88758	0	-0.456449	-0.262337	-2.53579	-1.5326	-0.252006	0.313775	-0.246381
0.676831	2.00402	1.63938	-1.7846	0	0.49854	-0.38241	0.871465	3.53249	0.361664	2.76673	-2.11182	2.83941	-0.19534	-0.983023	1.00359	2.5637	1.18206	3.00418	1.15164	2.07656	3.17585	1.92402
1.43843	-2.76786	0.540542	-0.911771	2.89113	3.61763	0	1.43577	-0.100654	0.360361	-2.95161	-1.24446	-1.11294	0.006983	-1.05595	-0.142755	-0.295573	-0.165701	-0.312013	0.317561	-2.34252	0.785977	0.211512
0.578566	0.275062	-0.405132	0.603875	0.258732	2.34614	0	-0.357016	-1.2668	0	0.714536	1.30804	0.852185	0.355488	-0.59573	0.85349	-1.21716	-0.108692	0	-0.317561	-0.560824	0.540542	-0.0603865
-0.0722378	0.229877	0	0.176056	0	0	0	0	-1.12822	0	0	0	0	0	0	0.282886	0.289445	0.15202	2.62158	0.634118	0.534189	-0.84211	0
1.45658	-1.43984	0	0	0	0.475741	0	0	-1.14109	0	-0.0804182	-0.417567	-0.130634	-0.481256	-0.816956	0.703733	0.818258	0.956511	0.0760746	0.126342	0.544599	0.391862	0
-1.02314	-0.799702	0.80863	-1.61067	-1.82534	1.10134	0.763362	0.99645	0.156372	0.47847	0.309829	-1.15917	-0.886269	1.147	-0.410995	-0.280899	0.0257649	0.0177331	1.50946	1.81425	1.01484	-0.997741	2.79947
-1.4015	0.686925	2.12491	1.78642	-0.263505	-1.57708	2.25573	1.68543	0.467655	2.93966	-0.539952	0	-0.495787	0.723119	0.231392	0.280899	0.331131	-0.137371	0.373832	0.371288	-0.275754	2.96385	0.205369
0.476172	2.40814	0	-0.11713	1.04988	-1.72144	0.371058	-0.209132	-0.415585	-0.931322	-0.821241	-0.0897263	-0.265428	-0.378124	0.192419	-0.280899	-0.540664	-1.91115	-2.87681	-1.87038	-0.131579	0.176835	-1.59531
1.10326	0.921059	-0.791561	0.11713	1.03897	0.884112	0	0.0697593	0.932649	0.350263	1.77281	1.52512	0.991744	0.665914	0.651468	-0.140746	1.7656	0.811133	4.652	1.93213	6.4127	0.117716	1.85873
0.348193	-2.19967	-0.797877	1.12042	0.515465	-0.763605	1.10498	-0.559442	-0.0515863	-2.83707	1.02169	-2.10128	-0.131666	0.0615616	1.11422	-1.13316	1.17878	-0.513244	0.438918	-0.495051	-1.23006	3.75224	-1.68022
0.860314	-0.73162	0.399734	0.778326	0	-0.64819	0	1.0464	1.78987	-1.57103	0.169272	-0.155411	0.0658545	-0.438597	1.11439	-0.285307	0.106476	-0.101334	-0.438918	-0.809721	0.449047	-0.85349	0.23753
-3.16598	-1.56318	-0.266312	0.0717618	1.53064	1.01166	0.547947	0.0693722	-1.63519	2.99963	-0.735589	-1.27771	-1.5926	0.0068679	1.49542	0	0.296908	-1.12917	-0.293686	-0.753299	-1.4921	0.0285673	0
-0.540056	0.228068	0.929005	-1.51792	1.25788	0.640284	2.34034	1.71885	0.872024	0.353983	-0.775374	-2.4852	-0.502935	0.1304	1.15862	0.427656	0.535327	-0.544217	0.146951	0	-0.888218	0.25674	-2.55307
0.0752389	1.44744	-0.662693	0	2.95588	0.637604	0	0.67935	-0.717584	0.235294	-2.18721	-1.5175	-0.640704	0	1.62371	-0.142349	-0.93871	0.774365	0.731532	-0.315557	0.152827	-2.01446	0.394717
-0.337594	0.71594	-2.28658	0.131014	0.242424	-0.437216	-0.356507	-0.952388	-0.464038	0	-0.0234028	0.505868	-0.747032	0.499437	1.29202	-0.285307	0.418986	0.0811025	1.73415	1.13138	-0.254842	0.145243	0.0605877
-1.23709	-2.77272	-0.682597	0.941149	-1.70944	0.595983	0	0.204848	-2.35305	-1.5394	-0.363445	-0.715812	-1.47642	0.306634	0.926095	0.142755	1.19413	0.673309	0.143164	1.36563	0.458249	3.17124	0.814361
0.130834	1.30552	-0.274349	-0.404333	-0.493828	3.08307	0.178412	-0.204848	0.580323	-3.275	0.258065	0.799243	0.998115	0.142775	0.0466636	1.41645	-0.420195	-0.347212	-0.57389	0.553337	0	0.112423	-1.05693
2.24114	-1.03086	-0.550966	1.93457	-0.247832	2.95418	0.355872	0.136612	-1.64416	-1.24071	1.15312	0.935715	1.39434	0.013587	-0.397336	-0.28169	0.380105	0.204732	0.287357	0.489298	-0.509296	-0.563382	1.02689
-1.06557	-1.38864	-0.415226	0.325895	-0.747201	2.57746	0	0.204569	-0.107009	-0.375235	-1.11798	-1.40307	-0.406092	0.251026	-1.04762	0.140944	-0.659149	-0.847972	-2.17558	-1.97172	-0.7174	0	-2.18721
0.7784	-0.596647	1.37743	-0.567458	0	0.472549	0	1.2187	2.32815	0.749067	1.08323	2.4268	0.911399	-0.244233	-1.19035	-0.42343	-0.102512	-0.0111978	2.60507	0.372671	0.0107991	0.983845	-0.677969
-0.605712	0.820438	-0.82418	0.539161	1.24225	0.252553	0.35461	0.0672721	1.96796	-0.623832	0.45079	0.533849	-0.606675	0.595965	-1.10778	1.12519	-0.0621794	0.0053044	-0.429492	-0.434918	-0.371438	-1.52201	-0.309694
-0.945282	-0.773818	-0.692044	1.06968	-0.247219	1.07663	0.176835	-1.83242	0.102512	0.25	0.861233	1.00433	1.27647	0.168663	-0.692549	0.418703	-0.542598	-0.260247	0	0.310849	-0.361945	1.10155	-1.81539
-1.40072	1.1892	-2.38943	0.0979501	-2.00007	1.41936	-3.96448	-1.93644	-0.926409	-0.751883	1.84655	1.47521	0.897165	0.00674059	-0.378673	0	-1.23014	-1.16731	-0.287357	-0.872823	-0.259336	-0.281294	-1.30347
-0.642361	-0.662356	-1.00072	-0.111951	-1.52675	-2.82101	-1.66825	-2.04593	0.154999	-1.7767	0.749235	0.808267	1.11843	-0.114652	-0.269608	0	-1.9757	-1.74893	-1.4493	-1.38716	-0.755901	-0.990808	-4.98627
-1.26326	0.477953	0.858374	-0.0560224	-3.92207	-2.79169	1.48426	1.69615	0.154759	0.127959	-1.75325	-0.365605	-0.887142	0.215706	0.343011	-0.27894	0.82956	0.775714	-1.47061	-2.70287	0.560956	-1.28849	1.33647
-1.28759	0.796634	0	0.447303	0	-0.634906	0	0	-1.1405	0.255428	0.101989	0.154291	-0.330579	0	0.573137	0.139567	-0.256493	0.239977	0	0	1.25398	-0.259703	0
0	0	0	0	0	0	0	0	0	0	0	0	0	0	0	0	0	0	0	0	0	0	0
-0.326124	1.06247	-1.29034	0	1.32452	-1.20742	-0.554018	-0.421349	0.208333	-2.58412	2.70408	2.4578	1.11954	-0.121277	0	0	0	0.0397396	0	0	0	0	-0.599203
-0.748016	0.826948	-0.144404	1.16474	-1.32452	0	0	-0.352485	1.90678	-0.393443	0.22024	-0.259213	0.717784	-0.148428	-0.206926	-0.139567	1.34564	0.0908601	3.63676	0.195503	-2.03758	-0.173511	1.42552
-0.0926456	-0.585675	0.2886	-1.08109	-1.88431	-4.10423	-0.743498	0.282088	-0.255559	0.785344	-0.275376	-0.877183	-0.717784	-0.439829	0.012184	0	-0.336305	-0.388086	0.569802	-0.587661	0.0262192	-0.435099	-1.49232
-0.257945	-1.66297	0	-1.55891	-1.09291	-7.50788	0	0	0.408581	0.130293	1.28228	0.300306	-0.327977	-0.394103	0.146092	0.139567	0.513521	0.37365	0	0	-0.0655609	-0.817284	0.200267
0	0	0	0	0	0	0	0	0	0	0	0	0	0	0	0	0	0	0	0	0	0	0
0.317544	3.15788	-0.2886	0	0	-0.570084	0	-1.48992	0.812187	-3.17487	1.41647	-0.629912	0.13132	0	0.206599	-0.840341	3.43715	1.65489	0.989407	2.52196	3.04854	3.71105	3.37682
-0.175853	-1.41963	-0.725166	0.606789	-3.63676	-4.23327	-5.56232	-0.501613	-2.76799	2.12774	-0.182688	-0.462568	-0.889774	1.43975	0.0242777	0.979714	-0.575982	-0.627947	-1.9887	0.38241	-3.06166	-1.16462	-0.581961
-1.37743	0.217988	-0.730463	0.0281334	0.568183	1.26488	0	-1.15608	-1.20263	-0.527706	0.161212	0.554826	0.396433	0.381795	0.339271	-0.139373	-1.00671	-1.91938	-1.15441	-0.95878	-0.512923	-0.832023	-3.76655
1.69496	1.14227	0.438918	-0.436959	-1.42656	-2.03694	0.589972	1.58619	0.367551	0.921666	0.0858738	0.639906	0.394867	0.493499	0.446564	-0.419288	-0.217493	0.147981	-1.97881	-0.386101	-1.36743	-0.839004	0.804833
-1.97893	-0.632984	0.582243	0.858012	-0.28777	-1.0894	0	0.285714	-0.736458	0	0.010729	0.344767	1.07791	0.259111	0.588343	-0.140154	0.0963766	0.268112	-0.370783	1.02631	-1.06162	0.665993	1.09617
0.41949	0.149298	1.01084	-0.843887	0	1.28218	-3.18752	-0.214209	0.263644	-0.657465	-0.139567	-1.12664	0.259572	0.0795914	0.394289	-0.421645	0.00932184	0.285477	1.1817	1.64561	0.283305	1.29034	-0.297767
1.75685	0.156524	0.430108	-0.438814	1.43064	1.48706	0	-0.4298	1.20389	-0.264201	0.781212	-0.256055	-0.682818	0.165612	0.214413	-0.42343	0.474265	1.03307	2.89456	1.74242	-0.499697	-0.829643	2.03352
-0.38693	1.9398	1.42048	0.523524	2.24729	0.412877	-2.25189	-0.575956	0.880607	1.31408	-0.224108	-2.10148	-1.54532	-0.172243	0.166449	-0.425231	-0.835344	-0.993303	-1.07566	0.307977	0.553569	1.02887	-1.86799
0.318859	0.872733	2.09359	0	1.92578	-1.28143	3.45914	3.12748	-1.14109	2.06726	0.713262	0.637984	2.00105	-0.245627	0.343908	-0.142146	-0.613077	0.423825	1.7864	1.9489	-1.13745	-1.89443	2.12739
0.263355	-0.377249	0.962207	0.112835	1.88939	-1.0092	0	-0.350509	-1.36557	1.89999	-1.07717	-1.41557	-1.53824	-0.319553	0.201053	-0.2849	-0.0596312	0.915441	0.424029	1.91165	0.556802	1.40989	1.47865
-0.549152	-0.00726876	0.273224	0	0.798939	1.7984	0.796817	1.53313	-0.956437	0.250627	1.08778	0.83939	-0.495951	-0.10007	-0.0590912	-0.428878	-0.595118	-0.10527	0.702744	-0.712592	-3.0247	-0.573067	0.382166
1.75652	0.962137	-0.821922	2.60189	0	0.0824665	0	-0.277008	-0.428037	-0.376176	1.27525	1.33213	0.396957	-0.481735	0.200768	-1.29778	1.38314	0.352248	1.52887	0.297531	1.57876	1.14287	0.949074
-0.707259	0.388015	0.411806	0.438537	-0.531916	1.89346	-1.80185	-0.277778	-0.376041	1.24846	0.125589	1.25797	1.31192	-0.639195	0.447323	-1.6094	0.118292	0.0302366	-0.414652	-0.357143	1.02523	-0.284495	0.22016
-0.901482	-0.409616	0	0	0	0	0	0	-0.756352	0	0	0	0	0	0	-0.147602	-0.108948	0.177678	-0.97426	-0.358423	-2.1861	-0.858374	0
-1.7415	-3.5027	0.410117	0	0.266312	1.03697	0	1.51832	-0.762116	-1.37416	0.500784	1.44499	0.455137	-1.33865	0.468714	0.735838	0.93618	0.170865	0.27933	0.952955	0.83057	-0.143781	1.12466
0.0366751	1.12719	-1.37365	2.21781	0.794706	0.235347	0	-0.894399	1.6798	-0.378072	-1.0777	-0.0838077	0.453075	-0.514387	1.06978	-1.0317	-0.36475	-0.425635	1.10958	0.679371	0.549905	0.973662	0.341138
-0.990072	-1.95844	0.689183	0.480321	0.263505	-1.90615	0	-0.138313	-0.269034	-0.887767	0.304606	0.963034	0.0322841	-0.738469	0.622624	0.590844	-0.105345	-0.649332	-0.414652	-1.09517	-1.01971	-0.887368	-1.37159
-1.12804	0.517534	-0.412939	3.00252	1.56661	0.174935	0	0.552106	-0.21575	1.13997	-0.209974	0.476339	-0.745184	0.559529	0.892557	0.587373	-0.831146	-0.727529	0.414652	-0.119119	-0.277393	-0.0575209	-1.86921
-0.376143	0.00748083	1.0974	-2.9626	0.516797	0.565673	0	0.480605	1.66001	1.12713	0.837263	1.72403	-0.227902	-0.421082	0.56799	1.59771	0.22481	-0.331959	2.31776	0.178625	0.802328	1.39982	-1.25504
1.27235	0.767544	0.27248	0.689475	-0.516797	0.129501	2.78903	0.341881	-1.60603	-0.124611	1.72552	1.44492	1.58451	0.393525	0.260196	0	0.655924	0.289847	-0.405132	-0.477043	-0.524936	1.26852	1.15906
-0.771289	-0.491146	1.48551	1.71616	-0.259404	4.24486	0	1.69209	1.60603	1.23917	0.368099	2.3899	0.480078	0.178989	-0.101735	-0.144196	1.50379	1.12667	2.27435	0.892597	0.442234	2.84432	2.74682
0.951356	0.268197	0.267738	0.711839	0.518136	-0.081753	0	-0.538359	0.476822	-0.865806	-0.337372	-0.788114	0.286944	0.514528	-0.135808	0.144196	-0.765982	-1.0064	-2.27435	-0.952388	1.4239	-0.218043	-2.26781
-0.0370593	0.59343	-0.670693	-0.141963	-0.518136	2.1399	0	0.336814	0.474559	-2.0076	-0.194762	1.74766	1.45388	0.0889163	-0.0566412	-0.723069	1.54129	0.294056	0.80863	0.893129	-0.517924	1.62385	1.58031
-0.473153	-1.43019	-0.13468	0.0258264	-0.260078	-1.39492	0.587661	0.803755	-0.951381	0.379507	-1.29087	-1.53777	-0.597956	0.341251	0.181139	0.289855	0.154342	0.13713	0.535477	0.532073	0.816553	0.535477	-0.0313627
1.98275	0.0974842	-0.540542	-1.61399	0.260078	1.39492	0.778214	0.133333	-0.63932	-0.50633	0.487325	0.74095	1.00503	0.0613016	0.530206	-0.289855	-0.424256	-0.18508	0.930239	0.353149	-1.11763	-0.133601	-0.156961
-0.806037	-0.790102	-0.816331	-0.223317	1.54642	-1.51821	0	-0.400535	-2.21571	0.884402	-0.24855	-0.152962	-0.125078	0	0.52741	-0.436364	-0.298054	0.445051	1.05264	1.28431	0.0274085	-2.02573	-0.0628536
0.576151	-0.857332	-1.65293	0.19707	3.0229	0.370875	-1.1696	-0.066912	-0.164069	0	-0.624092	-1.30147	1.18197	-0.573615	0.635914	-0.145879	-0.528334	0.264059	0.0654236	0.693644	0.87313	-0.821922	-0.314862
-0.471109	0.600146	-0.138985	-0.341836	0.987662	-0.661581	0	-2.2336	-0.0547495	0	-0.135735	1.29169	0.984623	-0.404873	0.620845	0	1.15686	-0.718104	-2.44964	-1.27538	0.2442	0.794634	-0.569261
-2.46386	-0.615387	1.24397	1.64581	0.978003	0.703508	0	0.205128	1.41384	-1.64874	1.34913	-0.968848	-0.214559	-0.420328	0.1215	-1.02716	-1.15073	-1.08025	0.401338	-0.350672	-0.953036	-0.849669	-1.85665
-0.114937	0.243568	-0.827591	0.323353	-1.22401	5.33069	0	-0.685404	-2.07318	-1.28702	0.483316	0.55758	0.0613497	-0.595611	-0.464705	-0.591718	0.418596	-0.0569883	2.11369	0	1.65517	1.095	0.225916
-0.111428	-0.495371	-0.277393	-1.40444	-0.74166	1.27996	0	0.137457	0.768812	0.516797	-0.462702	0.0261626	-0.399447	-0.292174	-0.556051	-0.148478	-0.109826	-0.277524	1.04032	1.27983	0.723961	0.0544366	-0.35524
-0.84956	-0.944164	-2.38943	-1.30497	0.495051	0.95871	0	-2.01186	-2.15657	-0.516797	0.277878	2.76694	-0.246609	-0.78333	-0.794943	-0.297619	0.182977	-0.272808	-0.388853	-0.347424	0.838049	-0.655203	-1.20425
0.240199	-0.231642	0.425835	1.14769	0	-0.920834	0	0.419581	-0.0559128	1.28702	-1.39718	0.406298	-0.278164	-0.274214	-0.789983	1.1852	-0.406052	-2.06951	-2.09981	-2.82372	2.60196	0.68241	-1.9508
-0.769844	-0.0541272	0	0.562424	0	0	0	0	0.557726	0	0	0.515017	0	0	0	0.147167	-1.06723	0.0995551	0.660941	0.950126	-1.28598	-2.89795	0
-0.372567	-1.06529	-0.425835	0	-0.247219	-3.84782	0	3.09197	0.554633	-1.28702	0.768276	-1.28776	-1.12046	-0.706567	-0.602309	-0.589972	-0.863306	-0.189863	0.525625	-0.41457	-0.800687	-2.63883	-1.92152
-0.476278	2.08873	0.990808	1.24435	-0.247832	1.23344	0	0.80863	0.881063	0.387848	-1.84756	-2.06426	-1.32327	-0.00709094	-1.30796	-1.0409	-1.13229	-1.47509	-1.18657	-1.55506	0.15802	-1.27317	-2.51607
0.837771	0.0688784	-1.41846	0.488307	2.4511	1.91815	0	0.401876	-1.15799	0	-2.26956	-0.297002	-1.21252	0.0638004	-1.03315	-0.299401	-1.18356	-0.0189723	-4.33672	-3.18459	-1.43125	-3.16548	0.174368
0.33904	1.15617	0	-1.42011	0.241838	0.272013	0	-1.88939	1.10316	-3.14574	0.355011	1.7625	0.0641849	-0.347851	-1.3628	0.448767	-0.756147	-0.483744	1.37554	0.248602	1.90381	2.02328	-0.769504
-0.0542796	-0.348485	0.569802	0.389308	-0.241838	0.386344	0	-0.68353	-0.494914	-2.15352	-0.408911	-2.21788	-0.676005	-1.05806	-0.903048	0.149142	0.490865	0.934311	2.16225	0.557105	-1.66384	-1.60336	1.91277
-0.906858	0.408968	1.27031	-1.89585	-2.4511	-1.94682	0	-0.274725	-0.608241	0.135962	-0.118682	-1.51528	-1.75958	-0.598308	-1.38215	-0.597909	0.268474	1.23647	-1.07528	-0.930239	-0.199933	-0.35982	1.02811
0.141515	0.181228	0	0.105541	0.495051	-1.26476	0	0.411806	0.166251	0	0.226452	-3.93687	-1.02429	-0.0723275	-1.49975	1.3403	0.108463	-0.330146	0.135044	0.248911	-0.911412	0.479473	-0.856023
0.519335	-0.0226355	1.11577	3.47275	-0.743498	1.69701	-2.9853	0.750601	1.91944	0.40678	-0.876297	0.318505	-1.00134	-0.0289457	-1.23611	0.295421	-0.729603	-1.24058	0.404041	-0.686002	-0.256151	-0.750191	-1.94451
-2.51144	-0.0226407	0.828734	1.27809	1.23611	-5.47841	0.804833	-0.682131	-1.47746	2.67039	-1.4447	8.40257	-0.808357	0.505343	-1.00001	0	-1.43627	-0.280251	-3.14019	-1.19611	-1.24968	0.0301159	0.105134
-1.03981	2.09874	-0.690134	0.10054	0.734397	2.42399	-0.804833	1.02146	0.768812	-2.40012	-0.641453	-8.20919	-0.644616	0.610218	-0.921317	-0.147602	0.286309	-0.270875	0.415226	-0.0633513	1.41153	-0.785977	-0.140203
0.20196	-3.31373	0.552488	0.937683	0.970881	-0.400176	0.403226	0.473134	0.491133	-1.35872	0.828688	1.28198	1.9549	0.135894	-0.533945	0.147602	0.592781	0.16756	0.550966	0.568722	1.0724	1.35646	0.454944
-0.713215	0.60934	-2.79348	0.904311	1.20049	-0.577538	0	0	-0.272554	-3.05579	-0.452165	-0.841376	-0.167029	-0.0357436	0	-1.03782	-1.07477	0.336175	1.49969	0.188857	-1.68071	-1.05343	0.938321
0.899535	1.14762	0.564973	0.455245	-1.20049	1.34808	-0.20141	0.470906	2.53315	1.81696	1.16485	-1.19551	0	-0.451468	-0.896293	0	0.987534	-0.338078	2.14198	0.376648	1.11914	0.753583	-0.381217
2.28644	0.837263	1.67602	-0.70219	0.241255	6.13614	-0.404041	-0.134318	-0.159787	0.138408	0.523048	2.44136	0.100251	-0.42466	0.269732	-1.0487	-0.304316	-0.143427	1.83732	-0.502514	0.187542	0.509212	0.554018
0.489707	0.334436	0.827591	0.689913	0.720291	2.33203	0	0.402415	0.743498	0.551726	0.0651891	-1.98359	-0.200602	-0.629502	0.217823	0.45079	0.191115	0.327169	0.64809	0.377122	-0.819732	0.951539	-0.519302
1.04837	-0.215397	0.684465	-0.233544	1.18907	0.752976	0.404041	-0.671594	-0.158856	0.548698	0.401063	-0.159291	-0.402415	-0.290761	-0.397564	0.149813	0.934105	0.80699	0	0.625393	0.390547	0.795877	1.2761
-0.223399	-1.03891	-0.684465	0.796719	0.236128	-0.369967	0	-1.4252	-0.0530082	0.545704	0.0324482	0.490909	-0.877495	-0.00727987	-0.412053	0.149589	-0.511066	-0.332095	-0.129283	-0.562677	-0.282657	-0.500369	-0.895015
-0.538757	-0.85261	0.820798	1.63472	-0.472814	-0.377823	-5.38432	-0.617074	0.211864	2.28658	0.603775	1.15208	0.507186	-0.0364073	-0.0129041	-0.900907	0.222104	0.166814	-0.909688	-0.755196	-0.554168	1.6389	-0.450529
-0.776851	-0.547072	-0.136333	2.74834	1.17787	1.61639	0	-0.620906	0.264201	0.794706	0.493246	0.42863	0.336701	-0.0874317	-0.154979	-1.21398	-0.654852	0.209225	1.03897	0.629725	0.29774	-1.90482	0.242845
-0.962713	-1.72915	0.408442	1.9326	1.16416	0.280234	-3.46355	-1.18345	-2.72817	-1.72992	0.235043	-1.12652	-0.776113	0	-0.375527	-0.152788	-2.39097	0.918412	-1.1696	-0.819418	-1.08697	-1.76098	0.103896
0.364386	-0.372787	1.48351	0	-1.39862	0.245196	-0.662986	-0.140154	0.324851	0.935211	-1.36451	-2.27077	-2.50399	-0.416348	-0.389965	-0.459771	-0.641806	0.28567	-0.524248	-0.0633112	-0.287298	-0.422451	0.242005
2.21749	0.0233399	0.534047	-1.62925	0	-3.13718	1.10255	0.768429	0.162031	1.84458	0.829523	0.724324	0.933455	-0.278531	-0.326137	0.612559	1.20374	-0.357215	-1.85682	-0.826714	-0.0137014	1.6792	-0.693003
0.71352	0.295169	-0.133245	-2.38135	0.701757	1.60795	0	1.92976	-0.7584	-0.918039	-0.807889	0.323721	-0.275672	-0.515124	-0.392773	0.76046	-0.479094	0.446475	1.85682	1.07972	-0.246948	0.474637	1.48407
-0.0741258	0.286566	-1.3423	-0.766471	0	0.110745	2.16928	-0.547572	-0.272257	-1.32628	1.02223	-0.0173777	-0.172682	-0.354768	-0.473374	-0.455582	0.969025	-0.348191	-0.924099	-0.189693	0.274349	1.49805	-1.83238
-1.32254	0.31659	0.9415	-1.13651	0	0.76669	-1.07876	-0.274914	-1.15164	-0.26738	1.21304	0.229143	-0.311581	-1.07192	-0.754121	-0.152323	-0.470156	-0.312603	0.924099	-0.316957	-0.411806	-1.02565	0.452568
0.708324	0.607204	-0.268097	-0.867075	0	0.651792	0	0.549075	-0.942096	0	1.51152	1.69522	0.1386	-0.0299401	-0.813392	0	0.0889401	-0.251038	-0.52701	-0.636945	-0.690134	-1.1554	-0.313098
0.0521677	-0.823303	0.535477	1.77491	0	-1.16269	0	0.546076	0.0556638	1.32981	0.560982	-0.351806	0.93056	0.276605	-0.604313	0.607905	-0.21095	0.343302	0.395518	0.636945	0.276625	0.416296	-0.594096
1.17839	0.585473	-5.48835	0.420851	0	-1.32456	0	-3.3925	-0.726057	-8.25778	0.732831	-0.342748	0.0342994	0.736364	-0.0404176	1.05502	-0.888217	-0.564889	1.30721	0.0634719	-0.290477	-1.134	-0.73879
0	0	0	-0.0600132	0	0	0	0	0	0	0	0	0	0	0	0	0	0	0	0	0	0	0
0.417801	0.65077	-7.61715	0	0	-0.893761	0	-0.990808	0.0560381	-3.50401	-0.144077	-0.350817	1.56519	2.3365	1.33853	0	0	0	0	0	0	0	-1.1721
-0.465286	-1.25942	-0.152323	-1.08644	-5.51038	2.65639	0	0.354988	-0.392928	1.03475	0.133793	-2.17339	4.36	0.404596	0.464284	-0.300301	-0.993635	-0.800918	0.388853	0.190174	-1.05836	-1.69496	-2.31308
-1.02985	1.73145	0	1.86382	-1.99012	0.796918	0	-0.782644	-0.450959	3.75224	-2.29919	-4.8961	-6.4754	0.136902	0.501651	-0.301205	-1.05456	-0.765364	-1.04032	-0.635326	-1.28216	-1.69313	-1.32501
-0.331438	-0.060781	-1.69105	0.475399	0	0.898746	0	-0.644932	0.619546	-0.425835	-1.86961	-0.582249	-1.10958	0.653105	1.3732	-0.302115	0.734638	-1.30898	-3.72879	-2.77885	0.537408	-0.0310511	-0.893195
-0.208857	0.189818	-0.155159	-0.845394	-2.28727	4.68507	0	-0.721504	-0.11236	0.70872	-0.537578	-0.971752	-1.6878	0.342784	1.31615	-0.303031	-0.469953	0.989561	-2.33367	0.327118	0.28169	-0.936044	1.2261
2.27333	-1.69833	0.464757	0	0.25674	-1.51389	0	1.36644	0.224593	2.37276	0.644748	2.50351	1.12836	-0.128406	1.29905	0	0.581201	0.316232	1.4478	0.0652955	0.505052	0.625002	0.294985
1.27469	-0.5881	1.68586	-3.43016	1.02042	1.24012	0	1.27752	0.112108	-0.414652	0.874486	0.788066	0.140154	0.028549	1.45713	0	2.41665	1.04169	0.205128	0.65062	0.530357	0.961099	3.04592
-0.325162	0.0775795	0.606062	5.36047	1.01011	-0.445881	0	-0.21179	0.892365	-1.53527	0.434392	-2.95788	-0.77329	-0.128535	0.832045	-0.761618	-0.74605	-1.17992	-2.62991	-0.585368	-0.278785	-0.961099	-1.04112
0.858584	0.510521	-0.151172	-5.2368	0.250941	-2.08568	0	0.704228	-0.445187	0.700774	-1.22322	-1.15582	-3.59234	-0.479892	0	-0.459771	0.449617	-0.187583	1.39278	-0.0978953	0	1.36141	-0.0360946
1.04791	-0.611386	0.903621	-0.806606	1.24535	0.630653	0	0.838579	0.556175	2.34655	-2.39357	-1.61091	-1.17735	-0.792911	0.653315	0	-2.72989	-4.0108	-1.04276	-1.14925	-0.700381	-2.61534	-4.76897
0.157028	-0.63077	-1.66293	1.16439	0	3.46378	0	-1.6135	-1.50883	-2.76643	-2.75604	2.80415	-2.35922	-0.427893	0.649075	-0.925933	-2.84208	-10.1624	-5.67885	-4.45719	0.937398	-0.982731	-12.1007
1.85251	0.51426	2.26083	-1.55138	0	-0.879837	-0.217155	1.54389	1.50883	1.39278	-0.0225378	1.87933	0.378215	-1.26533	0.170753	0.61824	1.36132	2.28365	0.736923	-0.138217	1.93083	0.0636943	1.56883
0.0068453	0.232883	-0.448096	-1.0183	0	0.305253	0	0.832182	-0.611963	0	-2.3721	-2.29178	-2.87211	-0.184182	-0.231806	0.614441	-3.06018	-0.144677	-1.47932	-0.693965	-2.99482	-1.79896	-1.73991
0.219656	1.91989	-2.73158	2.81568	0	-1.09054	0	0.619623	-0.896867	0.551726	1.35261	1.13945	1.92388	-0.554592	0	0.610689	0.191374	0.588197	-0.149142	-0.27894	0.238982	0.807107	-0.25718
0.659481	1.15704	0.766287	-1.43531	0	0.750648	0	-0.412655	1.50883	0.821922	0.238813	0.894943	0	-0.244998	-0.342592	-0.610689	-1.42635	0.50428	1.03936	-0.490025	0.838931	-2.47408	-0.473221
-1.08813	-0.120373	-0.920252	-0.112226	4.35904	-2.5493	4.04741	-1.10881	-0.723632	-0.959569	0.8708	-0.431679	0.456275	-1.58085	-0.331472	-0.153257	-0.786015	1.46336	0.882359	0.629593	-0.292826	0.853304	0.687583
0.61843	-3.26719	-1.24033	0	2.11028	-1.15863	0	-0.418995	-0.447929	-0.552488	0.449388	-2.41381	-0.227877	-0.00755201	-0.283234	0.306279	-0.938291	-1.01337	-1.92171	-1.19258	-0.265679	-1.11733	-1.68434
0.206005	0.217543	0.311527	-0.0499189	-0.932408	1.61103	0	-0.561405	-1.75493	-0.834497	2.06353	1.03628	1.39704	0.0528521	-0.259307	0.457667	2.29372	1.03514	0.59524	0.703238	0.850476	0.921059	-0.130747
1.42315	-0.51354	0.928799	-2.66919	-1.65293	-0.452401	0	1.95128	0	1.24915	2.38701	1.89386	1.8206	0.924158	-0.247586	0	2.09552	2.11843	0.739102	1.8744	1.15943	0.945094	4.4357
0.054479	-1.1218	-0.308642	0.345556	1.18345	-3.19254	0	0.481929	0.114155	-2.37276	-0.688545	0.824256	-1.8206	0.477506	0.185747	0.909097	-2.13481	1.53789	0.294118	1.97487	-1.47926	-1.37167	-1.25946
-1.21308	-0.268584	5.70725	1.29476	-0.945634	2.77255	0	2.30832	0.341686	3.74264	1.56387	-0.116814	-0.0750188	0.80804	0.727276	0.150716	1.73536	-0.335565	1.89097	1.47258	-0.362774	1.92157	2.58563
1.07976	0.205452	-1.47061	1.86174	4.6412	-1.59025	0	-0.605858	0.905496	1.48551	-0.928948	-0.773677	-1.58854	0.265448	1.22072	-0.301659	-1.40367	-0.340783	0.717878	0.132802	-1.11042	-0.712208	-0.578036
2.0582	-0.197543	-0.296736	2.11901	-0.911168	-1.00659	1.24483	-1.97756	0.785638	-0.807541	-2.6964	-3.68163	-0.726998	0.125106	1.25393	-0.302572	-3.76595	-1.50067	-1.58619	-1.80788	-1.98422	-3.7403	-3.75492
-0.323131	2.35287	2.20435	-4.46115	-4.44518	2.82302	0	-0.552488	1.38775	0.135044	3.20999	2.43712	4.28476	-0.0735727	1.28573	0.904984	0.828444	1.42978	0	0.471858	-0.230947	-0.982892	2.37904
0.335049	0.570065	0	2.24306	0.71514	0.555897	0	1.58025	-0.44199	-0.94916	1.64068	1.64493	0.477153	-0.147308	0	-0.451468	6.05729	0.0851948	0.868312	0.937089	0.317415	3.64528	-0.0419903
-0.298773	0.291478	-3.55067	1.01098	-0.71514	-2.28234	0	-1.23458	1.42938	-2.62265	0.575767	1.70845	1.16492	0.213526	2.62666	0	0	0.0374628	0	0	0	0	0.33543
-0.232309	0.41275	0.750191	1.01301	-2.17663	-1.15216	0	1.30273	-0.767127	1.80185	-0.544276	-1.08712	0.21692	-0.110387	1.19117	-1.51979	-0.0690489	-1.50611	-1.74423	-1.13904	1.11733	-0.197239	-0.503568
-0.139314	0.304646	-1.05185	0	-0.490197	3.02339	-3.78196	0.54348	-0.939493	-0.412939	1.00251	0.989766	0.288496	-0.103138	1.09835	-0.614441	2.12541	1.44821	1.16619	0.671594	1.13316	1.37257	-0.126289
-1.60802	2.03989	2.53556	0.508722	0.245399	0.098038	0	1.41274	0.110988	2.45244	-0.155982	0.625766	0.215827	-0.539523	1.09756	-0.154202	-0.859074	-0.14934	0.722025	0.800004	0.0563222	-0.782018	0.58799
-2.10116	-2.07792	-2.08341	0.205178	0	-0.193718	0	-0.603017	-0.333334	-2.59047	-0.291819	-0.903941	-1.26561	-0.43819	0.865038	-0.15444	0.33364	-2.90034	1.00216	-1.0681	0.0281492	0.489477	-2.50172
1.23478	1.11961	2.81709	-1.76371	-0.98523	2.57209	4.39861	1.46767	-0.838228	0.962207	-1.10197	-0.81731	-0.474194	-0.00744352	0.82477	0.769827	0.44764	0.688193	0.42644	-0.336135	-1.73177	-0.522194	1.8716
0.828117	-0.717228	0	-0.566086	0.739831	0.0310934	0	0	-1.24225	-0.273973	-0.847822	0.393142	0	-0.0670166	0.458917	-0.461185	-2.3624	0.156857	1.82718	0.268998	0.28596	-1.1519	-1.22961
-0.466636	-1.65015	-0.146306	1.03132	0.490197	-1.58486	0	-0.198873	-0.569802	-1.52042	-0.0106434	1.1846	-0.219619	0.104229	0.174273	-0.61824	-0.646487	-2.8797	1.24569	0.469013	0.285144	-1.33291	-3.38427
-1.85247	-0.672414	-1.47495	-0.538887	-0.982809	-0.97906	0.204708	0.990434	-0.74563	-0.698815	0.953397	0.261747	0.875598	0.0743826	0.282547	-0.155159	1.1269	-0.367753	0.137457	-1.34592	0.312722	-0.0335514	-0.397966
0.290968	-0.731635	1.76735	-0.455413	-0.495051	-1.07674	0	1.17572	0.230017	-0.845075	0.913057	0.635376	1.19156	0.674351	0.389906	-0.311042	0.327017	-1.8476	1.09291	-0.407333	0.580204	-0.504627	-1.15866
-0.0948907	-0.989174	-0.292398	0.332533	-0.497513	1.36951	6.7219	0.647251	-0.402878	0.282486	0.593721	0.227467	0.60834	-2.5583	0.452977	-0.625002	1.26694	-0.212064	-0.272109	-1.577	0.239589	1.93727	0
1.64329	-0.975153	-1.62365	-0.468327	-4.59264	-0.677486	-0.191388	0.707171	0.4603	-0.565772	-0.77148	-2.46917	-1.1843	-0.341543	0.268658	0.780644	-0.391004	0.361486	0.94916	0.62005	0.281136	-0.264989	0.313269
-1.40345	-1.76014	2.78815	-2.42573	-2.1109	1.80741	0	-0.128205	-1.09669	1.12836	-1.65677	-0.932246	-1.9319	0	0.117981	0.310559	1.4341	0.933214	1.20726	1.22868	-0.281136	0.661159	1.11088
-1.38214	0.0729483	0.577202	-0.494831	3.14987	1.23205	0.763362	-1.55142	0.520985	2.35631	0.148857	0.344664	-0.442642	-0.0228111	0.16066	-0.622086	-2.36504	0.257809	-1.47753	-1.29739	0.0422208	-1.56072	-1.11088
-0.943409	-1.66671	-0.867057	-1.77087	0.772205	-0.0334552	0	-1.64207	0.46083	-0.963531	-0.297936	-0.683148	0.846683	0.129194	0.053496	-0.783089	-0.0103162	0.350883	-1.36242	0	0.57356	-0.907722	0.579195
0	0.0741198	0	-0.27225	0	0	0	0	0	0	0	0	0	0	0	0	0	0.452306	0	0	0	0	0
-1.72634	-0.909699	1.86921	0	0.51151	0.812892	0	2.29143	-0.807852	-0.554786	0.859467	1.19428	2.10381	0.326042	-0.0749024	0.938974	0.288452	-0.53955	0.547197	-0.344234	-0.0542966	0.471699	-0.222371
0.326579	0.224057	-0.428266	-0.0649309	-1.54245	2.66558	0	-0.324149	-0.464577	1.24397	-1.61895	-1.70787	-1.33697	0.105924	0.309945	0.62112	-0.80908	0.11679	1.89195	0.344234	-0.196161	-0.404177	-0.44623
0.224821	-0.982932	-1.44095	-0.861062	-0.780238	0.687825	0	-0.58613	-0.174774	-0.550966	0.471345	0.804314	-1.0973	-0.272604	0.234492	0.154679	0.754201	1.99945	0.932718	0.616651	0.865806	-0.1013	2.56085
-0.862931	1.49554	0.867057	-0.723259	0	-1.28168	0	0.845533	-0.291971	0.962207	-1.76824	-2.16564	-2.49501	-0.814653	0.11704	-0.775799	-0.0823752	-1.65277	-1.33513	-0.342115	0	0.168776	-3.05401
2.19784	1.08269	-1.0123	0	2.83159	-0.396704	-0.763362	0.709909	-0.586512	0.273224	1.5971	1.63877	2.23723	1.76553	0.23367	0	0.390679	1.15717	1.46767	1.90094	0.775627	2.39932	2.57335
1.20013	-0.59731	0.724116	3.00315	1.51136	1.48218	0	-0.193112	-0.353565	-0.547197	-0.0535418	1.27736	1.24589	-0.203	0.381195	0.311042	1.54763	-0.981414	-0.53121	-0.0672721	-0.27632	0.754473	-1.76761
1.42507	-0.51837	0	2.70389	0.498754	-1.71558	0	0.128783	-0.177253	-1.24225	0.320822	0.156708	-0.621007	0.0601911	0.484977	-0.311042	-0.0134721	0.878447	0.398672	1.13752	1.37403	-0.589972	0.710798
2.46652	0.870642	0.144196	-1.10304	0.743498	-0.467277	-1.73917	-0.128783	0.295247	-0.417537	1.11484	0.86656	0.584583	0.337902	0.942119	-0.155885	-1.64367	-0.127968	0.331017	0.795233	0.707101	-0.858374	0.0884956
-0.371511	-1.15979	0.28777	1.91005	3.39839	0.964938	0	0.128783	0.0589449	-0.139567	1.46738	0.862694	-0.767969	0.329292	0.726672	0.466927	-1.42424	-1.72352	-0.331017	-0.662254	0.432667	-0.199137	-3.64823
0.0258962	0.667906	-2.17874	-0.0123663	2.12523	0.396817	-1.57174	-1.03494	-0.176939	-0.982464	-0.302194	-0.996357	-1.03322	1.29168	0.484962	-0.779427	-0.966731	0.1273	0.660941	-0.466201	-0.0539811	-1.03524	0.685717
-0.147113	-0.991088	1.31293	2.17746	0.466201	0.0659833	2.54168	1.4203	-0.473374	0.982464	-0.334518	-0.540081	-1.08149	0.221027	0.339105	0.3125	-1.38781	-0.532701	0.394478	-0.737022	-1.90793	-2.44661	-1.37617
0.459844	-2.78579	-1.01967	1.72749	-1.6413	-2.03057	0	-0.0641231	-0.535238	-1.97468	0.501359	0.181561	2.2981	-0.0368039	0.4912	-0.156128	0.800429	1.09924	-1.05542	-0.370558	0.013758	-1.80498	0.965303
-2.59972	-0.333405	-1.32647	2.09493	0	-1.97023	-2.93851	-1.74705	-0.119332	0.284495	0.705983	1.96148	3.1027	0.125078	0.813343	0.156128	-0.97126	-0.605582	-1.46963	-1.59895	0.452955	-1.51759	-1.28915
-2.62041	-0.480688	1.76475	1.9492	1.1751	1.02335	-0.199005	0.455878	3.11515	-0.712761	1.20316	1.1847	0.884179	0.102888	1.01749	-0.469117	0.536423	0.281619	-2.0395	-0.688234	-0.109619	1.86724	2.19991
-1.01619	-0.154999	1.87731	-0.515317	-1.88685	-0.578693	-0.399202	0.194742	0.806921	-1.44095	0.0306607	-1.19182	-0.317405	0.13213	1.48239	-0.313972	-0.120533	-0.253422	-0.966191	-0.345901	-1.85421	-0.244627	-1.23149
-0.239124	-0.28479	0.99645	0	-0.716849	-0.41094	0.1998	0.0648298	-1.03867	1.29778	0.611249	0.379952	0.17646	0.0953184	1.20738	0.938974	-1.11291	-1.41165	-2.10239	-1.11499	-1.69018	-0.984537	-0.875783
-0.045316	1.38182	1.54606	-5.13537	0.239521	-1.69392	0.398407	0.903232	1.21074	3.242	-0.223691	-0.568688	0.316846	0.0732601	0.767851	0.466201	-0.633301	0.72615	0	0.698327	0.862745	0.352734	0.369686
-2.36926	-3.42484	-1.12203	-0.302609	1.18907	-0.139704	0	-1.68398	-3.61766	-0.975617	-3.46951	-3.54453	-3.10573	0.131733	0.569637	-0.466201	-2.7409	-5.77255	-5.23375	-3.25347	-0.791747	-3.58461	-8.76825
-0.197222	0.851966	-1.85059	-1.40392	-1.90937	-0.947524	0	-0.392671	1.70844	-0.140154	-1.14469	-0.384815	-0.910587	-0.0804829	0.307604	0.775799	0.687695	-0.535834	0.298063	-1.88685	0.0283849	2.70043	0.301659
-0.364951	0.436339	-1.15608	-0.307825	-0.241255	-1.02786	0	1.17342	1.27686	-3.86038	1.3342	-1.54671	0.146252	0.0951092	0.038384	0.616335	-2.19412	-0.257726	-0.447428	-0.366973	-0.326914	-3.17602	-2.18227
0.684502	-0.331444	0.435099	-2.00542	-0.484262	-4.48174	1.18578	0.645997	0.918491	-0.584797	0.189155	0.0489338	-0.807048	0.335816	-0.230526	0.153492	1.86935	-0.888485	0.447428	-0.812112	0.864702	2.14048	0.664794
0.244661	-0.789409	1.29405	2.42383	-1.22102	-4.88556	0	0.257235	-0.171576	-0.883658	0.230705	0.0827566	0	0.0364339	-0.317843	0.459067	-0.868764	-3.24221	-3.02138	-1.49368	0.0141133	-2.36074	-4.80259
-0.837229	1.9015	0	-0.578855	-0.739831	0.351032	3.47525	0.448575	-2.14067	-0.593474	1.58989	-0.320121	1.02603	0.109222	-0.15447	0.76046	0.331317	-0.502691	-1.38998	-0.831134	0.604997	1.78479	0.692782
0.596657	-0.650113	-0.429492	0.995522	0.493828	0.349804	-2.88759	0.0639182	-0.527706	-2.25743	-0.66198	-0.0867974	-0.842033	0.232609	-0.0773246	0	0.0631606	-1.05169	0	-0.0759013	-0.266873	-1.01597	3.08521
-0.4701	1.00373	-5.91014	-0.625654	3.62797	1.1932	-0.981362	0.19151	1.45903	1.66042	1.62639	0.741009	1.53232	1.07602	-0.0290121	-0.15163	3.63968	2.55144	5.30026	2.992	0.840341	1.84287	1.48227
1.0989	2.23064	2.70287	0	-7.1371	1.68669	-0.991088	0.0637552	-0.931322	-0.751318	1.7309	1.80493	0	0.615827	-0.00967258	-0.60883	-0.899384	0.206709	1.3187	1.31774	1.10958	0.53562	-1.43079
2.41338	-1.86969	0.148039	0.711223	-1.54245	0.685481	-0.399202	0.698637	-0.822083	0.900907	2.25241	2.15908	2.53812	0.256666	-0.174267	0.45697	1.12118	0.720136	-0.437637	-1.0234	-1.4029	-1.32642	1.73474
0	0.0857486	0	1.14204	0	0	0	0	-0.41359	0	0	0.046814	0	0	0	-0.304414	-0.594963	-0.785788	-0.586512	-1.62967	0.321207	-0.216763	0
-1.30096	-0.145816	-0.891536	0	1.28702	0.518575	0	-0.0633112	-0.474778	-0.599702	1.14142	1.68503	1.57594	0.120975	0.00968945	-0.152555	-2.50432	-2.73776	-1.63087	-0.900231	-0.559286	-3.83386	-5.19058
-1.17792	1.40637	1.92171	-0.87358	1.01782	0.695512	0.995033	1.07088	0.297001	1.19583	-0.0582185	-0.25876	-0.802377	1.18068	0.193592	0.304878	0.551371	1.78821	4.10014	2.08807	-0.0280466	0.935111	1.58566
0.695762	-0.305163	1.45351	-0.0609496	-0.762393	1.25861	0	0.873368	0	1.91323	0.416486	2.01679	0.279818	0.175556	0.0483395	0	-1.39532	1.0136	0.286533	0.515275	0.280112	-0.784904	0.627289
-0.16843	0.0594101	1.29034	0.267901	1.01524	-0.871847	0	-0.311042	-0.535238	0.291121	2.81145	2.32077	0.418265	-0.189613	-0.0967025	0.152091	1.36599	0.650195	1.56142	0.585653	-0.139958	2.40976	0.36411
2.74761	0.962601	0.568183	0.799423	-1.01524	-0.0518276	2.92704	-0.437091	-0.838328	0.724116	-1.55321	1.17913	-0.0695894	-0.0914238	-0.232468	-0.152091	2.52005	1.81243	1.88356	2.23755	1.01722	-0.109951	3.46974
-0.173338	-2.13181	-3.31204	-2.54137	-0.255428	2.70798	-4.32287	-3.56726	-0.240819	0.288185	1.02555	2.8378	1.17648	0.189787	-0.0387973	-0.152323	-0.750089	-0.0476471	-1.04204	0.142653	-0.542157	1.02153	-0.502766
0.0438005	2.47575	-1.47495	-0.0495111	-1.02829	0.080697	0.600602	1.48055	0.421053	-1.7417	0.330111	-0.944703	-0.241088	1.66444	-0.0970591	0.456275	-0.679562	0.392217	1.11112	0.49769	-1.72939	-1.97954	0.0503905
2.16892	1.40537	0.444775	0.284355	0.258065	2.43049	1.78046	0.700417	-0.904438	0.146306	-0.301773	-0.297059	0.82418	0.37226	-0.457444	-0.456275	1.27937	0.528574	1.50791	1.12836	-0.554648	1.94323	0.502514
0.38364	1.55677	0	-0.780818	0.2574	1.45444	0	-0.317763	0.121065	-0.733679	0.480521	-0.959901	1.05461	0.0962861	-0.312653	-0.458366	-1.61361	-0.658623	-0.136147	-0.140351	0.0285185	1.44199	-3.20883
1.75308	0.76939	0	-0.711747	-0.2574	-1.15597	0	-0.446572	0.663252	-0.739102	1.44639	0.522612	1.07709	0.12366	-0.303818	0.76278	0.243526	0.186065	0.407886	-0.775471	-0.256959	0.214516	0.824747
0.635963	-2.59903	0.883658	1.25772	0	1.11353	1.55645	1.14432	0.539408	0.591718	0.055571	-0.166141	-1.31426	0.233164	-0.403246	-0.609758	0.318956	0.706843	0.810815	0.634923	0.882317	1.13638	0
-0.385444	0.495582	0.14652	0	0.51414	0.935585	0	1.3187	0.655349	-0.147602	-1.29539	-2.56675	-0.476029	0.32825	-0.157807	-0.153022	1.5512	2.51444	0.937716	1.39667	-0.0283407	-0.637622	5.15243
0.349593	0.13997	-2.82127	1.83919	0.51151	-2.84579	0	-5.31665	-0.416543	-0.890214	0.486573	-0.198094	0.306279	-0.43105	-0.276762	0.305811	0.0925959	0.50708	-2.15642	-1.25612	0.593474	0.425533	-1.02917
0.12334	-2.60058	-2.59359	-0.413928	-1.02565	2.74361	0	-6.3837	-1.07915	0	-1.61855	-0.177936	-1.16201	-0.03429	-0.386771	0.152555	0.241769	-0.140973	0.54348	1.39472	0.561957	1.68425	-0.74166
-0.514363	1.49194	-5.5614	0.134105	-1.8206	0.137026	0	-4.00626	1.19834	-0.448096	0.0569044	0.314595	-1.00191	0.0480027	-0.169062	-1.07281	-0.612668	-0.479141	0.675222	-0.0692761	-0.505619	-1.40156	0.148773
-0.630268	-0.81865	-2.81709	0.0243635	-2.1221	-1.48235	0	-0.512259	0.237954	0.149589	-0.675453	1.43385	-0.766821	-0.15781	-0.109545	1.07281	-2.15248	-0.605776	-1.62826	-1.04494	-0.536497	-2.28418	-2.35659
-2.1652	-0.757771	-0.674539	-1.06534	-1.89451	1.379	-8.03645	-0.73638	2.23276	1.0409	-0.143287	-0.63473	0.558271	1.37754	-0.00996463	0.152323	0.24794	0.861804	0	0.558661	-0.0283166	-1.05245	1.2103
0.200386	-0.414991	0.842465	-0.642215	1.35687	-0.137168	-1.05153	-1.33931	0.0580889	0.589972	-1.41519	0.18949	-0.698327	0.446007	0.338241	-0.917438	-2.06041	-0.350321	0.953036	0.208696	0.0849257	-1.32209	-1.10888
0.38973	-1.25541	1.33335	0.826706	0.537636	-1.17237	-2.13683	0.522975	0.174064	1.31485	1.8825	1.2564	1.70232	0.141495	0.287599	0.153492	2.1696	-1.16675	-0.679812	-0.417828	-0.396938	2.55488	-1.32655
0.114615	-1.53283	-1.16571	0.22094	0.534761	0.553984	0.431035	-0.747947	-0.639723	-0.874641	2.65706	-1.02679	1.36848	0.329379	-0.118906	-0.615387	1.69884	0.364316	0	0.278746	0.904984	0.14404	0.97113
-0.219508	1.72172	-2.71664	0.342718	0	-2.02173	-4.39631	-1.13251	0.058326	0.729398	-0.921494	-0.737986	-0.955965	0.321608	-0.248176	-0.15444	-0.0107298	-0.0829594	-0.410117	-0.0696136	-0.267813	0.752827	1.2636
3.19704	1.26152	-1.21214	-0.748148	-0.267023	0.456374	0	0.151745	-1.17303	-2.95007	-0.309061	-1.32022	-0.89594	0.0668717	0.0496845	-0.154679	-0.458881	-1.10403	0.410117	0.555557	-0.523598	-0.93291	-1.0096
0.31192	-1.18435	0.521287	0.0738371	-0.805373	-1.554	0	-1.22046	-0.118064	-0.29985	-1.2174	-1.1775	-0.764423	0.133609	0.0198669	0.309119	0.426685	-0.947559	-1.23543	-0.97426	-0.284172	-1.0145	-0.610689
2.73135	1.85969	0.17316	0.539812	1.0724	-1.39838	-1.81411	0	1.34939	-1.81823	-0.867788	-1.22327	-0.911008	-0.0333856	0.0297929	0.154202	-0.0501038	-0.0964185	-0.832182	-0.350263	0	1.76868	-0.102145
1.27722	0.61229	1.2038	3.27385	3.14987	-0.0367645	0	2.05096	0.116482	-0.306279	-0.923705	0.162092	0.316289	0	0.366718	1.52908	2.55523	1.80937	2.88284	2.76834	1.04743	2.50852	3.31689
-0.412094	1.46921	-0.686109	0.966305	2.55116	-3.11787	2.70897	-0.301205	0.811599	-1.38998	2.4728	1.39158	1.63567	0.333356	0.404799	-0.303952	1.23114	0.167175	0	1.82623	0.140706	2.41308	1.17937
0.540749	0.222231	1.19762	-0.364214	-0.758537	-2.41228	2.63752	3.33735	0.862322	-3.80395	0.141356	-0.21551	0.79079	0.703061	0.432603	0.758154	-0.352186	2.2825	0.405132	0.734561	0.224719	0.306071	4.06852
-1.49567	-2.43001	-2.40976	1.18178	0.758537	0.798168	-0.871465	0.0729129	0.342857	-0.974034	0.55407	1.57772	0.648577	0.0132179	0.225391	0.150943	0.331503	-1.1027	-0.269906	0.199402	-0.224719	0.101816	0.281031
1.504	1.62102	1.55578	1.75261	-0.252207	-0.0385605	1.7354	0.798552	0	0.325733	0.102963	1.16463	0.271832	0.454951	0.0684965	0	0.5775	0.436235	-0.406229	-1.00101	0.0281175	1.04607	1.71579
-0.0833618	-0.381997	3.373	-0.114364	1.25472	-0.798477	0	1.86252	-0.342857	1.77281	0.50392	0.0643054	0.844742	0.177462	0.254006	0.150716	-0.157794	-0.229162	1.21377	0.868119	-0.479077	-1.14789	1.36988
0.378934	-0.751632	-1.50379	0	1.73057	0.722642	0.429185	-0.855315	-1.15142	-0.963089	0.139528	-0.747134	0.302369	0.052521	0.068276	-0.150716	1.22152	2.86365	2.1221	1.32102	0.871894	1.85035	5.21319
0.741022	-1.23995	4.28402	1.98273	-1.23306	2.98811	0	3.0316	-2.28414	1.60003	-0.409837	-0.965926	-0.403362	1.72435	-0.29294	0.301205	-1.32113	-0.0862926	-1.45409	-0.724402	-0.533484	-1.27476	-0.388183
0.00628306	-2.28356	-1.62605	-0.754466	1.72206	-0.739025	0.640344	-1.11733	-0.177883	-0.317965	-2.11289	0.333305	0.537455	0.154709	-0.480322	0	0.199114	0.501357	-0.400267	-0.0661157	-0.281929	-0.338181	0.258956
-2.46111	-1.05627	2.58914	-4.62671	-1.97051	2.19962	2.31346	0.560226	-1.01403	-0.159363	-0.928992	0.901553	-0.537455	-0.0773246	-0.640743	-0.150489	-1.10007	-0.340532	0.133601	0.39604	-1.13573	-2.2958	-0.909294
0.174517	-0.970025	-0.641028	-5.61213	-2.77445	0.43443	0	-1.3357	-0.360361	-1.12271	0.957587	1.06183	-0.236048	0.321792	-0.884039	-0.452831	1.13436	0.543424	0.133422	0.328839	0.0713623	0.034656	0.520609
0.368138	-0.204018	1.27797	0.125141	-2.06726	-2.11616	3.47328	2.99778	1.01767	0.482704	1.46637	0.907438	1.408	-0.0257053	-0.801367	0	0.560685	1.42817	0.266312	0.98008	0.597441	0.656193	2.85795
0.20953	0.566674	0	0.436764	0	1.06368	5.47011	4.03823	0.712169	3.15982	-0.56508	-1.51136	-0.601003	-0.425094	-1.17351	0	0	0	0	0	0	0	1.58535
-0.809753	-0.806706	-3.22609	1.55674	-3.4532	-1.10123	0	-1.26122	-0.891007	-0.780644	3.00502	2.39082	2.61129	0.0451715	-1.3214	-0.454891	-0.629277	1.54144	-0.667114	0.518808	0.24081	-0.690849	1.88607
1.71439	0.877315	-0.164069	-0.923709	1.3423	0.845998	-2.30779	0.2002	-0.119403	-0.786786	0.966808	1.51173	0.877056	-0.0451715	-1.00524	0.606062	-0.309247	-0.0317399	-0.402415	-1.17113	0.226117	-1.71303	-0.774724
-0.711891	-0.735004	-1.82275	-0.608131	-0.267023	1.09073	0	-0.267023	-0.299133	0.315458	-1.51823	-6.95719	-1.04032	-0.109787	-0.910286	-0.151172	-1.87233	-0.737075	-0.404041	-0.0654665	-1.47898	-0.743235	-2.36085
-1.35871	-0.534713	-1.68638	-0.549246	-0.267738	-0.616704	-0.977525	-0.805373	-0.0599341	0.471328	-0.489631	4.29898	-1.11733	0.361198	-0.992931	-0.454891	-0.735543	-0.678133	-1.90741	-0.854987	-0.574714	-1.97316	-1.18045
-0.420371	-0.2326	0	0.187582	0	0	0	0	0.418786	0	0	0	0	0	0	0	1.91722	-0.310291	-0.413509	0.65833	1.23158	-0.362977	0
-0.33171	0.944917	-2.40976	0	-1.89451	-3.46952	3.85404	2.06743	0.357569	-1.10324	0.636974	-1.58672	0.593082	0.500932	-1.01361	0.30349	0.065818	0.638879	0	0.327547	0.0142318	-0.364299	3.5413
3.11874	-0.319915	-1.22701	-0.840605	-3.05155	0.501572	-1.52384	-2.00007	-0.417288	-0.795549	-1.27803	0.118779	-0.560041	-0.057672	-0.915708	-1.06627	-1.73608	-0.783964	-3.51407	-2.1819	-0.384972	-0.146092	-3.96629
2.64882	-0.374532	-3.77403	0.0125984	-0.564973	-0.340266	0	0.738011	0.773583	-1.77281	1.12147	-0.978178	0.0330306	0.0448589	-0.684153	-0.460477	-0.222234	-1.56617	-1.44095	-0.603421	0.342271	0.328408	-1.1135
0.025749	0.765401	0	-0.479859	-0.568183	0.362647	0	0.0668226	1.41262	1.29243	1.93507	-0.0890899	1.05126	0.179234	-0.349307	0.153728	0.731856	1.27104	1.44095	0.737022	1.13251	1.84087	2.59313
-0.395805	0.0886211	-8.60129	1.12028	-1.72418	3.12689	-1.15831	-2.98327	1.10434	-1.29243	-0.908106	-2.14831	-1.84702	0.344762	0.16389	0	0.458195	0.086469	-0.717878	-0.535477	-0.0281571	-0.430108	-0.589227
0.38812	-0.604178	0.597017	0.499439	-1.75443	-0.291307	-0.779731	-0.137741	0.863315	0.809721	-1.97151	-1.667	-1.37425	-0.46635	0.326976	-0.307693	-0.388106	-1.88017	-0.578036	-1.28337	0.0281571	-1.30154	-2.95588
0.203468	2.18607	0	1.27469	1.46415	-1.32019	0.195503	-0.830455	0.0572902	-0.485045	0.158044	-0.678962	0.538541	-0.0704609	0.206533	0.307693	0.00700624	0.0359563	1.43887	0.407056	0.505477	0.616726	0.563626
0.664713	-0.471946	-2.00408	0.0491763	0.868312	2.89435	4.76735	3.01186	0.343054	0.967749	0.989055	1.69589	1.92825	0.192049	0.357705	-0.307693	-1.52984	-2.36523	-1.43887	-2.2596	-0.336701	-0.28975	-4.01377
0.440194	-0.254375	-5.19327	1.2823	-1.15943	0.631551	0	-2.73428	-0.343054	0	-0.377828	-0.201147	0.0987329	-0.275385	0.604101	0	-0.255006	-1.07627	1.43887	-0.207972	0.336701	0.650762	-1.81658
1.37793	-0.457747	-1.93763	-0.840802	-1.76475	-3.15707	-3.21693	-4.31926	-0.920605	-1.29243	-1.6477	-1.62032	-2.46433	0.256197	0.846056	0.307693	0.639843	0.0554179	0.569802	0.0693722	-0.280505	-0.0360425	0.957818
-0.824178	-2.96391	-1.75443	-0.269575	0	-5.82562	-1.16055	-1.09132	-0.754283	0.324676	-1.11374	-2.25471	-2.11251	0.0639468	0.923524	-0.461895	-0.116998	-0.474702	0.566574	-0.416957	-0.267211	-0.288809	-1.27914
0.387767	-0.0181785	-1.78576	-0.627733	-1.4948	-0.586383	0	-1.17735	0.522801	2.24368	2.68755	3.23005	1.6055	0.217114	0.726434	0	1.54884	-0.942362	-0.993621	-1.12046	0.575723	0.720464	-0.692044
0.297522	0.507753	1.3423	1.3125	-0.907722	-0.877041	-0.781254	0.369413	1.49514	-2.24368	-1.83697	-1.00766	-1.3304	0	1.03314	0.768643	2.11516	5.43212	3.50421	3.3925	1.16928	3.31834	7.576
-0.691701	-0.444143	-1.3423	-0.623436	2.40252	0.255329	-1.58106	-2.91828	0	2.08508	-1.47898	-1.56361	0.582094	0.076516	1.17661	0.153022	-0.737985	-2.48317	0	-1.50894	-1.11329	-2.5674	-5.92307
-0.0992601	1.47884	-0.904984	-0.442424	-0.894194	0.69193	0.397615	-0.762199	0.22805	1.26185	-1.03688	-2.44081	-1.96524	0.0191198	0.603552	0.761618	-0.587404	-0.752467	-2.08776	-1.60226	0.209688	-0.60747	-0.410678
-0.146617	0.615716	-1.14287	-0.308395	0.298954	1.01469	0	-0.229797	0.907036	0.625002	-0.386773	1.10778	0.520925	0.121008	0.20377	0.15163	-1.37481	-0.838635	0.280899	-0.140548	-0.82732	-1.44407	-1.28856
-1.09162	0.0711427	0.687288	0.185151	0.298063	2.22579	1.57484	0.382702	1.34531	1.8519	-0.524528	0.26582	0.138456	0.235227	-0.20377	0.453516	0.769988	1.49165	0.837994	0.280899	0.309293	0.543972	1.15129
0.927747	-1.57695	-0.228572	0.418411	0.888895	-1.91563	0	-0.613029	-0.167178	1.66797	0.408204	1.43861	1.13501	0.828411	-0.398549	-0.453516	0.777944	-0.852015	0.693003	-0.140351	0.140272	0	-0.550966
1.48844	-1.80431	-0.688866	0	4.32968	1.38257	0.584228	-0.153846	-2.82824	1.49257	-0.233055	-1.35016	-0.445588	0.364597	-0.266585	0.604231	0.819987	1.08591	0.138026	-0.563382	-0.393259	1.15068	0.550966
0.0999623	0.183739	-3.51736	2.40245	-0.566574	1.40203	-0.975617	-2.65226	2.66079	-0.892863	-0.487283	-1.29771	-0.482095	0.163009	-0.50435	-0.301659	0.058314	-0.668764	0.137836	-0.353732	1.09168	-0.214746	0.0915332
-0.400825	-0.885043	0	0.502273	0.566574	-2.4375	0	0	1.82679	0	-0.264123	-1.13721	-1.18057	0.181505	-0.5484	0.150943	-1.60745	-3.09821	-0.968866	-2.43915	-0.334635	-1.4799	-5.01864
-0.0898735	0.609308	0	0	0	-0.386496	3.27898	0	0.819453	0	1.99774	1.1969	2.07405	0	0	0.150716	1.0676	2.15906	-0.557882	0.867684	0.306791	0	4.78965
-1.73837	0.797547	0	0	0	-1.28545	0	0	0.163088	0	-0.82916	-0.0820865	0.239194	0	0	-0.150716	-1.34677	-0.244534	-1.26673	-1.15859	-0.334728	-1.6499	-0.367479
1.23321	0	0	0	0	1.20797	3.72483	0	-0.163088	0	0.521438	-0.768154	0.40872	0	0	0.150716	1.07748	-0.311469	0	0.942377	0.167504	3.80826	-0.553762
3.00291	-0.393395	0	0	0	0.271592	0	0	0.596693	0	-0.734658	0.90617	0.373198	0	0	0.300752	-0.207641	0.986658	-1.28298	0	0.195068	-0.64263	3.18788
0.607637	0.14656	0	0	0	1.15147	0	0	0.216099	0	0.454964	0.360924	0.708625	0	0	0.150038	-0.0658431	0.230835	2.12925	1.50379	-0.278785	-0.430726	0.402595
-0.622985	0.328978	0	0	0	-0.190545	-0.182983	0	-0.270197	0	-1.86192	-0.596038	-0.539448	0	0	-0.45079	-1.9639	-1.91399	-0.704725	-1.57596	0.278785	-1.7417	-2.486
0.961626	0.100305	0	0	0	-1.19309	0	0	0.701	0	1.41666	2.64008	1.80909	0	0	0.300752	0.718617	-0.108354	-0.283286	0	0.638271	0.656697	0.411053
0.551188	1.04267	0	0	0	-0.388144	-1.10498	0	1.01578	0	-0.886729	-0.624215	-1.40424	0	0	0.29985	0.765751	-2.51408	0.988011	-1.16196	0.414079	1.22878	-3.33673
-1.08905	0.144209	0	0	0	-0.819351	0	0	0.583401	0	0.283439	0.135395	-0.168492	0	0	0.149589	0.756475	0.981535	0.420463	0.727805	-0.497101	0.608775	0.891397
1.59461	-0.977472	0	0	0	-2.37929	-3.96653	0	-1.70671	0	-1.28679	-0.826193	-0.270179	0	0	-0.149589	-0.211098	-0.834988	-1.12519	-0.508907	-0.332779	-0.0357079	-1.22182
-0.617569	-0.702782	0	0	0	-0.321748	0.384616	0	1.44195	0	1.1696	1.53312	1.07636	0	0	0.149589	0.276759	0.110163	0.141343	1.4472	-0.892863	0.85349	0.330423
0.970086	-0.938628	0.950126	0	0	-3.98366	2.83841	0.63042	-0.106101	3.95656	-1.59562	-2.42942	-1.75502	0	0	0.596127	-0.436243	3.70466	2.09651	1.99153	0.335759	-0.817782	3.06288
-1.80785	-0.0647399	-0.473935	-4.66393	3.60649	-0.251839	-0.749067	-0.0785855	2.04893	2.83305	0.148817	1.23127	1.6546	0	0	-1.64798	0.232208	-0.245082	1.91787	1.25964	0.0279291	1.38276	0.182648
0.152513	-1.66049	0.473935	-0.714961	1.08402	-1.0972	0	0.938974	-0.3125	-0.700774	-1.58884	-0.360785	-0.705767	3.01196	0	0.452148	0.0449928	-0.0144353	1.21377	0	-0.0838106	1.15527	1.4493
1.5039	0.0282154	-1.4286	0.314209	0.269179	-0.213422	0.749067	-0.077912	0.156372	0.280899	-1.67593	-1.30672	-0.575006	-0.133576	-6.37226	0.450113	1.25848	1.98157	-0.268457	-0.418119	0.279096	3.32052	2.39905
-1.97672	-1.26812	2.6037	-0.188407	1.06953	2.93563	1.29752	0.853711	-0.679386	0.140154	-0.75053	-2.50477	-2.54222	0	0.716217	0.745716	-2.23556	-0.58047	0.536194	0.557105	-0.279096	-1.97218	-0.572311
-0.875875	-0.209744	-0.938974	-2.23757	1.05821	0.494957	0.367647	-0.232108	-1.42595	-0.280505	-0.258331	1.06708	-0.523287	0.151777	0.186475	-0.446762	0.0768425	0.951486	0.133601	0.484933	0.779514	0.616229	0.747749
0.882073	-1.20015	-0.947874	-1.64629	-0.263505	-0.122787	0	-0.543691	0.265604	-0.704725	0.773	0.472725	0.66237	0.139432	0.164249	0.446762	0.258038	-0.0564187	-2.15933	-0.484933	0.938456	-0.478961	-1.45666
-1.03887	-1.70478	-0.477328	-0.0784519	-2.94533	-1.53522	-0.921666	-2.36418	-0.63864	-1.71188	1.36639	1.09565	1.48304	0.157385	0.0874891	0	0.0522239	0.511059	1.22035	1.51622	-0.0549602	0.0685636	0.26643
-0.961592	-0.354331	0.238949	-0.590359	-1.36801	-1.17822	-1.86921	0.477328	-2.26792	0.859604	-0.456784	-0.944853	0.171028	0.0120963	-0.394305	0.444775	0.264183	-0.548194	0.269179	0.273224	0	0.102757	0
-0.0598959	0.0492878	-0.47847	-0.382309	-0.552488	0.75902	-1.13853	0.711747	-0.602576	-0.859604	-1.5172	1.38423	0.91853	-0.0665477	-0.671698	-0.296297	1.17683	0.661901	0.669795	0.74754	0.274499	0.987915	2.10626
0.502977	-1.08002	-0.48077	0	1.9205	2.73336	0	-0.473935	-0.0549602	-0.577202	-0.538582	-1.92061	-0.509253	0.0907359	-0.843231	-0.59524	-0.616022	-2.35345	-0.938974	-1.84494	-0.494642	-0.919468	-4.89422
-0.787321	0.159267	-0.483093	0	-0.818558	1.57522	0	-0.954661	-0.551269	0.289018	-1.81299	-1.3959	-2.06335	-0.16944	-0.648337	-0.298954	-0.0759747	-1.04121	-0.676135	0.206683	-1.08019	-0.308378	-0.273973
-0.00634453	-1.08001	-0.242424	-2.06853	0	-2.95146	0	-0.16	0.386207	-0.724116	0.0211484	-0.628	-0.487636	-0.357978	-0.742912	-0.450113	-1.42305	0.658943	1.07963	0	-0.64255	-1.38219	-0.320586
2.94676	-0.241595	-0.486619	0	0.546449	2.3752	0	-0.481542	-0.386207	-1.02265	-1.25547	-0.383357	-0.314741	0.0668388	-0.668823	0.150263	0.332348	-0.663524	0	-0.137741	-0.280663	-0.174125	-0.690452
-0.0696015	-1.47218	-0.9804	-0.907558	2.15642	1.11553	-4.28916	0.401446	-0.721224	-0.441502	1.4245	1.0152	0	-0.0242999	-0.387465	-0.150263	-0.644711	0.50793	1.72992	0.960227	0	-1.65177	0.690452
-1.64458	1.39152	-0.246609	1.3784	1.06102	0.227225	0	0.956945	-0.334635	-0.147602	-0.518547	-1.69647	-0.879513	0.442546	-0.629977	-0.150489	0.539879	-0.415595	-0.33036	-0.822486	0.0561956	-0.782644	-0.505864
-0.723686	0.472957	2.19789	-0.241871	-1.32804	4.93531	1.58106	2.35305	0.223214	-0.444116	0.328373	1.89597	0.984537	0.0604705	-0.668667	0.150489	0.220022	-1.97973	0.198347	-0.482926	0	-0.608993	-1.62681
-2.6348	0.0903116	1.43887	0	0	1.76989	3.65777	0.309598	-0.615042	-2.70693	0.600982	1.91711	0.836242	0.0120897	-0.614958	0.300301	0.0174414	-0.214179	-1.06243	-1.11267	0.224467	-1.19286	0
1.00408	1.24597	-0.477328	0.10757	-1.07528	1.36372	0	0.846484	-0.506045	0.304414	-2.13554	-0.263554	-1.3273	-0.00604467	0	0.149813	-0.678965	-0.582545	-0.334337	0.488316	-0.280663	-0.876558	-2.32293
2.00135	-2.38584	-0.479617	0	0.539085	-1.10987	-0.378788	-0.0766577	-0.338792	0	0.844789	1.27739	1.29259	0.042305	-0.935461	0	-1.96467	0.0227398	-0.874543	0.0695652	-0.493063	0.32961	-0.770346
0.259369	-0.467766	-0.723767	1.24209	-0.539085	1.84513	0	0.0766577	-0.738011	-0.45697	-0.159855	2.24877	1.1046	-0.151172	-0.141077	0.149589	0.125271	1.13432	-0.270636	0.899971	-0.0734629	-0.182983	0.530249
1.83902	2.99219	-1.21804	-1.97044	1.3423	1.2786	-0.953296	-2.56126	-0.285307	0.60883	0.042653	-0.763544	0.547759	-0.175646	-0.353565	0	0.157261	-0.174572	-1.22701	-0.899971	-0.0820031	1.31006	-0.0480885
1.57678	1.38516	-2.48152	0.795528	0.796817	-0.197794	-3.70774	0.548806	0.966741	-0.456275	-0.824283	-0.787898	-0.891638	0.326817	-0.366669	-0.149589	-0.565864	-0.589586	-0.274725	-0.557882	-0.852278	-1.75059	-2.18827
0.50758	-0.5969	1.49629	-0.660246	0.264201	-1.14369	0.989128	-0.863767	-0.396938	0.759305	0.343385	-0.184987	-0.206897	-0.163275	-0.785157	-1.66042	-0.0323293	-0.409376	-1.17608	-1.40847	0.568992	0.293902	0
0.574888	1.25812	-0.247832	-0.189445	2.86105	1.00652	-1.78754	-0.236873	0	0.903621	-0.0107129	-0.240995	1.47339	-0.133236	-0.526884	-0.457667	0.448086	-0.881563	-0.488316	-0.42644	0	-0.73638	-0.492855
-0.460709	0.753117	1.96567	0.755637	1.2739	0.591759	1.19523	1.25689	-0.1706	0.597909	2.13056	2.56889	1.88685	-0.115211	-0.553818	0.457667	0.488807	-1.74088	0	-0.786561	-0.526205	-0.741843	-1.64387
-0.000708785	-2.34549	-0.243605	0.335503	-0.253486	0.359425	-0.198216	2.31492	-0.628035	0.594355	-0.863709	-0.126708	0.86408	0.0182	-0.411324	-0.152323	1.04802	0.278209	0.835659	0.215131	0.270559	0.963327	0
-0.00425282	0.226233	0.729043	-1.55272	2.5064	0.464702	3.70052	0.759882	-0.401722	0.148039	-0.711293	-1.69883	-0.198741	-0.194305	-0.66898	-0.152555	-0.00704449	-0.442603	-0.416957	-0.935595	-0.398975	-0.110681	-0.100503
-0.89891	0.890112	-0.973244	1.56612	2.92704	0.142744	0	0	-0.172662	-0.296297	-0.48059	-0.165945	0.529102	-0.194683	-0.956476	0.304878	-0.512052	0.334146	0.278164	-0.144718	-0.28596	-0.666669	-0.100604
-0.243112	-0.390282	0	0.840397	0.718566	0.142541	4.12043	-0.607443	-0.288434	0.296297	-1.46665	0.599785	0.263505	0.540525	-0.407433	0.758154	-0.710609	-0.0892645	0.692044	-0.290065	-0.30114	-1.27152	-1.11337
0.625379	0.283107	0	-0.719907	0	0	0.183318	0	-0.231348	0	0	-0.747522	0	0	0	0.602411	0.0463433	0.12543	-1.10958	-1.46308	1.46841	0.861913	0
0.29205	1.66284	0	0	0.476191	0.390321	0	0	-0.231884	1.17648	0.541713	-1.01045	-0.626961	-0.285082	0.173053	0.449439	0.565084	0.708612	0.971555	1.39044	-0.255066	0.854547	0
0.85522	-0.6541	-0.7362	1.24985	-5.11683	-0.319127	0.72993	0	-0.874386	-0.881063	1.13882	0.729143	0.692729	0.75641	0.308281	-0.299401	-1.2015	-2.06449	-0.971555	-1.39044	-0.341103	0	-1.02303
-0.134624	0.759509	1.22401	-0.982613	-1.25788	-2.01158	0	0.228224	-0.82305	0.734757	2.34386	1.74895	0.42644	0.391084	0.809324	-0.300301	-0.269373	-0.337775	-0.840341	-0.888237	-0.22805	-0.482107	-1.86824
-1.10032	-0.66305	1.2092	0	2.00508	-0.837938	-2.20597	0.681563	-0.82988	-0.882359	1.18259	-0.756818	-0.393572	-0.705056	0.450863	0.150263	1.99754	0.256291	0.979714	0.888237	0.767594	1.47604	1.35278
-0.568897	-1.91761	0	0.744486	-1.50003	1.63353	0	0	0	0.735838	0.175158	0.0807073	-0.197368	-0.0846996	0.533529	-0.300752	-0.377925	0.114873	1.38315	0.514518	0.0566251	0.72993	1.28371
1.74853	0.753908	-0.240674	0.0529661	-1.77895	0.143976	-0.186047	-0.529702	-0.417537	-0.146735	0.349399	0.457332	0.197368	0.344401	0.265701	-0.755861	0.775498	0.600724	1.76996	0.2197	1.32154	0.0727008	-0.306592
-1.67505	0.0877492	0.95924	2.16076	-1.81117	1.67451	0	1.43129	-0.299312	0	-0.390585	-2.32655	-1.48985	-0.0241298	-0.544235	0.303031	0.231482	0.0445047	-0.27027	0.437957	0.306791	1.4072	0.815499
0.577032	3.90858	-0.47847	-0.0518336	1.03897	1.08991	0	-0.224635	0.47847	-1.77782	1.24861	0.800079	0.465891	0.29519	-0.583801	-0.606982	0.388106	2.04591	0.539812	1.44616	0.194742	-0.179308	3.04947
-0.367272	-0.951088	0	0.491338	1.02829	1.42369	0	0	-0.658488	0.149365	-1.09425	-1.03199	-0.299252	0.0541239	-0.354372	0.303952	0.854795	-0.363677	-0.13468	-0.359583	0	0.715311	0.294985
1.2162	1.23186	-0.240096	2.26993	1.01782	1.43711	1.11112	-1.13081	-1.26928	-0.899556	-0.0411396	-1.03897	-1.34095	0.724836	-0.417076	0.454202	0.207383	-2.17694	-1.76755	-1.23235	-0.0834144	-0.142653	-4.57022
-0.459224	2.25476	-2.67982	0.691088	0	-1.43711	-1.29752	0.227187	-0.243605	-0.907722	-0.971684	-0.140106	-0.236527	0.155067	-0.246154	-0.454202	0.495971	0.486619	-0.826451	-0.292184	0.125096	0.640344	1.12418
0.62829	-0.182916	-0.495051	0.06259	-5.19597	-1.45806	0	0.753583	0	-0.916037	0.940819	0.427278	0.438819	0.309414	-0.160326	0.303031	0.596035	0.522097	-0.833338	-0.88171	-0.097283	-0.49769	2.50891
-0.444985	-1.57774	0.987662	0.225	1.58733	0.626792	0	0.598804	-1.78411	-1.23458	-0.195705	0.0942845	-0.845599	-0.416742	-0.0987898	0.151172	-0.342115	-1.02498	-0.559442	-0.073828	0.0556019	0.213599	-1.74961
0.216908	0.704294	0.490197	-0.601129	0	-0.0341764	2.94139	-1.57957	-0.373135	-0.936044	0.616715	1.92274	1.55042	-0.155233	-0.210253	-0.454202	-0.240179	0.123521	-0.562589	0	0	0.567377	0.352379
0.428186	-0.788026	0.973244	0.125534	2.33474	-0.278729	-1.09291	0.302801	1.54563	-0.471328	0.826577	1.9844	1.26289	-0.275235	-0.223104	-0.15186	-0.973462	-2.94637	-1.27752	-2.46741	-0.222593	0.352983	-3.47683
0.840441	0	0	0.388155	-2.59755	-3.15252	0.182983	0	1.7032	1.25197	0.718954	1.67521	1.31235	-0.221936	-0.0496463	1.20847	0.574177	0.824647	0	0.528503	0.278164	1.60786	1.08669
-0.188642	0	1.44233	-0.0750094	1.04713	-1.77817	0	-0.151286	-1.21361	-0.624027	-0.495626	-0.4681	-0.293782	-0.499655	-0.385597	0	0.0896335	-0.325714	0	0.300752	-0.836825	-0.835659	0.154281
0	0	0.238379	-1.1699	0.778214	1.8148	0	0.377787	-0.122175	-0.627946	0.253178	1.39425	0.716615	0.0181034	0	-0.150263	0.563537	0.0108188	0	0	-0.618153	-0.983845	-0.102828
0	0	0	0	0	0	0	0	0	0	0	0	0	0	0	0	0	0	0	0	0	0	0
0	0	-2.65396	1.20741	0	2.24044	0	-1.21398	0.548615	0.157356	0.313053	0.151764	0.550252	-0.283997	-0.964255	0	0	0.934308	0	0	0	0	1.93587
0	0	0.2442	-0.262878	0.258065	-2.78244	0	1.13853	0.726835	0.470589	0.763362	-0.141168	0.835749	-0.680027	-0.302458	0.749067	1.35793	0.262648	1.55921	3.10446	1.76007	0.282088	1.10387
-3.08392	0	-0.9804	1.52998	0.770222	1.97025	-0.549956	-0.378072	-0.241692	-1.41846	-1.04608	-0.666173	-1.15906	0.322375	0.0378573	0	-0.111613	-0.838932	0.700774	-1.24498	-0.138562	-0.529569	-1.96529
0.383681	0	-0.246609	0.480267	-0.512822	-1.28437	0	-1.29624	0.241692	1.57484	-0.740857	-0.0106665	-0.19449	0.991005	0.327497	0.149142	-0.159179	0.154111	0	0	-0.222099	-1.60574	-0.817582
0	0	0	0	0	0	0	0	0	0	0	-0.17438	0	0	0	0	0	0	0	0	0	0	0
-3.05998	-2.75541	0	-0.147529	0	-0.866355	0	0	-0.666064	-1.25788	-3.13512	-3.25085	-2.59669	0.701042	0.175902	-0.149142	0.402538	1.34702	0.972906	2.25875	-0.222593	0.752557	3.13157
2.22596	3.34933	1.22701	-1.06371	-0.774197	1.32687	0	-1.70283	-1.22251	1.25788	-1.56783	-1.74453	-1.20604	1.1812	0.112916	0.59524	-1.01792	1.00536	0.689183	1.14614	-0.783002	-1.14903	0.496033
-1.11796	3.46446	0	-1.07514	-1.83012	2.75482	-6.45385	0	0.0614817	0	-0.578222	0.261761	0.168379	0.629395	0.400451	0.591718	0.218028	0.426068	0.684465	0.355493	-0.393812	-2.07999	0.0494682
0.443724	-1.67632	0	0.88845	1.83012	-0.129534	-3.18752	0.467291	-0.246154	-0.469852	0.20383	0.958901	0.134499	0.193316	0.299289	0	0.231135	-1.20134	0.544219	0.354233	0.590138	-0.33241	-2.65613
0.791532	2.03318	-2.97052	1.10266	3.3124	-0.720377	2.00408	-0.311284	-1.74026	-1.42295	-1.52263	-0.71645	-0.0336078	0.0994414	0.0249004	0.147384	-0.108703	-0.323247	-0.271739	-0.638526	0.586676	0.0739645	-1.48378
-0.488928	-0.625337	0	-1.8906	3.20619	-0.00862191	0	0.388954	-1.77108	-2.25452	-0.589328	-0.642849	-1.08146	0.151896	0.372764	0.147167	-1.63452	0.29635	0.135962	0.709223	-1.28962	-1.30234	0.308801
1.0014	0.491665	4.66342	-0.301811	4.27619	3.91923	0.39604	0.310078	0.445719	-2.14	1.1211	0.981296	0.812187	0.174978	0.235367	-0.147167	1.28383	1.59155	0.135777	0.704228	0.562748	3.74906	3.23587
-0.0770635	-0.357335	0.47847	-0.290093	-1.87799	0.195237	-1.19286	1.1543	0.190416	1.15799	-1.02264	-1.88904	-0.676364	-0.233372	0.2595	-0.294985	0.479764	0.336404	0.406229	0.768966	-0.0561325	2.49389	0.891536
1.41224	-0.188113	-0.718566	0	1.41179	-2.04573	2.37165	0.913944	-0.572339	1.14474	0.762531	-0.2728	0.5752	-0.0292099	0.0246792	0.735838	-0.821423	0.0711405	-0.406229	-0.209132	-1.29982	0.910689	-0.444775
-0.168505	-1.64531	-1.45281	1.34247	-0.703403	0.0349834	2.12568	0.830507	-1.54245	-2.63607	1.75339	0.106177	1.63966	0.00584266	-0.469949	0.584797	1.03166	-0.887675	-0.407886	-1.19342	1.13123	1.35067	-0.148699
0.140441	0.99765	0.729043	1.06608	0.703403	-2.50485	0	-0.225819	1.28702	0.83126	-0.256246	-1.14736	0.529627	0.105109	-0.522	0.436364	-0.604765	0.110385	0.94916	0.563382	0.0843289	1.09478	-0.0992556
-1.92421	-0.108352	-1.21804	1.66304	1.62228	0.323493	-0.575265	0.150602	-1.35181	-0.998344	0.448001	1.65771	1.37707	-0.0116734	-0.174607	0	0.503094	0.849179	0.806456	1.60226	0.978618	0	1.23367
0	0.027099	0	0.869361	0	0	0	0	0.0647878	0	0	0.372608	0	0	0	0	-0.190063	0.355486	0.26738	1.577	-0.348408	-0.991631	0
-0.506549	-0.889056	0.244798	0	0	0.844529	0	-3.05601	0	0	0.583649	-0.105243	-0.228199	-0.485651	-0.162409	0.867057	0.602881	-1.23366	-0.804294	-1.78454	-0.111747	1.19557	-2.48275
0.765548	-0.658258	0.2442	1.38493	-0.23015	0.728303	-2.92704	-0.388652	-0.976252	-0.167364	1.92817	1.7299	0.683041	-0.0469346	-0.0875602	0	-1.0182	-0.0185286	0.536914	0.964859	0.0279486	0.474256	-0.150943
3.38838	0.758445	0	-0.332542	0.23015	0.0230534	0	0	0	0.834033	0.909191	-0.593144	1.32026	-0.105683	0.200025	0.57389	-1.35318	1.47869	-0.133958	-0.274725	0.0698373	-0.848469	0.902262
-0.368764	-0.355661	1.69291	-0.596589	-2.56126	-0.867547	-0.198216	0.388652	0.261267	0	-0.587964	0.152329	2.33966	0.0645976	0.485891	-1.00648	-0.26314	0.58809	-0.134138	-0.75941	0.556949	-1.23458	-1.20483
3.53281	0.319241	-0.240096	-0.443779	2.79088	-2.39898	0	0.0775494	-1.71057	-2.01349	-0.872823	-1.07871	-1.60659	0.515284	0.533004	0.144404	-0.312511	-0.454814	-1.89708	-1.53634	0.221914	-2.37441	0.252207
0.308437	0.00910622	0	-3.11323	2.26767	-0.322664	2.35305	-0.155159	1.31841	0.169348	1.72784	-0.157741	0.569983	0.0758969	0.419443	0.144196	-0.132243	-0.664174	-1.23883	-0.211342	0.0277047	-0.0706964	-1.57404
0.417725	1.52716	-0.723767	0.0867679	4.60103	-0.42974	-0.583092	-1.64387	-1.85068	-2.57084	-0.15398	0.901767	1.16153	0.151621	0.307295	-0.144196	-0.341857	0.933358	-0.277393	-0.141143	0	-1.10223	0.459536
-0.133778	2.12066	1.44233	1.58568	1.90886	1.21512	0	0.393856	1.65402	0.346621	0.930525	0.757017	1.48702	-0.0349691	0.37974	0.144196	-0.26592	-1.88034	-0.976979	-1.99721	-1.87339	-1.25924	-2.1628
-0.439567	3.1628	0	0.595783	-1.90886	1.86649	0	0.470589	3.48198	0.345423	-0.715018	-1.57988	0.0922084	-0.25097	0.353939	0.431345	-0.555108	0.117557	-0.845075	-0.433214	-0.282646	1.22348	-0.208442
0.401552	5.93629	0.476191	-0.182006	-1.29312	-0.315224	0.96994	0.3125	1.13423	1.36988	-1.1444	-0.757765	-4.23593	-0.0467617	0.0974184	-1.15441	-0.29638	1.69318	0.42343	0.289018	-0.5677	-0.717878	1.39862
-1.03088	-0.449908	2.34753	-0.976332	1.93347	1.00962	1.3423	2.16058	2.29183	3.837	0.82611	-0.0492079	-2.07261	-0.0292372	0.291687	-0.145243	0.105951	-1.01391	-1.13316	-0.869571	-0.0427077	-0.216372	0
0.0326314	3.98585	0	0.428319	2.10534	1.37688	1.88685	0	0.305717	0.489797	0.164406	1.05454	-0.821427	-0.286978	0.496339	0.290276	0.0141183	0.769917	2.11424	0.652886	1.16083	-0.65194	2.23814
0.267787	-2.22197	-0.465117	0.195193	3.6814	0	-0.938974	0.60883	-1.53802	-1.14661	0.450728	1.82647	-0.264288	-0.27604	0.769882	-0.581397	1.32527	-0.380635	-0.419288	-0.217155	-0.777114	1.62195	0.251193
1.26304	-1.11377	0	0.94615	2.77245	1.01917	0	0.454202	-0.684295	-0.495459	2.16367	2.37016	1.44502	-0.23553	0.430468	1.01524	0.160084	0.547847	-0.421053	-0.07249	0.0283648	1.10223	0
-0.255026	0.399202	-0.233372	1.24777	-5.00605	-0.067702	2.2389	-0.454202	-0.500627	1.96728	0.13993	-1.12355	-2.2421	-0.188824	0.511754	0	-0.746923	0.948823	1.39667	0.794515	0.283206	0.42343	1.04818
0.312911	0.817368	-0.233918	-0.0834974	-2.70568	-1.05468	-0.555043	0.831134	-1.19913	0.969313	-0.159936	1.35678	1.09436	0.011812	0.355493	0.862074	-0.396666	1.15955	-0.277778	-0.722025	0.535892	-0.282088	0.544691
1.10243	1.67716	-0.234467	1.52765	1.04933	0.409817	-0.371748	-1.13509	2.25998	-0.483482	0.419288	0.211239	-0.429682	0.159325	0.271691	0	1.26175	0.248559	0.416378	1.65293	1.14671	1.64598	0.295858
-0.238151	-0.178912	0	-0.258885	-2.32323	0.101595	0	1.58554	-0.560226	1.28413	-0.109644	0.577727	0.660286	0.816235	0.623275	0.570615	-0.774035	0.338162	0.414652	-0.428572	0.166713	-1.89346	0.344065
0.469135	0.116718	-0.706717	-0.899521	0	-1.30102	1.84507	-0.450451	-0.25	0.794285	0.0398843	0.920295	0.884527	0.344455	0.374445	-0.427656	0.530616	1.4728	2.04785	2.05462	-0.445187	0.881063	4.13322
-0.274001	0.233028	0	-0.22615	0	0	0	0	1.49071	0	0	0.90492	0	0	0	-0.286123	0.333681	0.856063	-0.135227	0.210158	0	0.908145	0
-0.260484	6.34275	2.79739	0	1.2739	-0.414772	0	1.71582	1.46881	1.88093	2.19876	0.595292	0.520496	0.034963	1.10344	0.57143	0.422453	-0.428628	-0.40678	-0.350509	2.1791	0.554786	2.7857
-0.651522	8.24316	0.915338	0.629568	0	-0.277474	0.182648	-0.370508	1.98503	1.23458	0.89321	-0.612751	1.03293	-0.029135	0.965636	0.142349	-0.152154	-0.156666	0.271371	0	-0.245868	0.379638	0.0915332
1.23089	-0.760614	0.454546	-1.76805	2.08776	2.50326	0	0.444445	-0.837325	-0.615387	-0.251621	1.35622	0.95878	-0.33274	1.21668	-0.2849	-0.360561	-0.374113	-0.271371	-0.775471	0.0273486	-1.03879	-0.596469
-0.817242	0.894635	-0.682597	-0.313858	2.04506	-0.714489	-0.548949	0.883008	2.25663	-1.08612	-0.651341	-1.12252	-2.7081	-0.146289	0.900096	-0.285714	0.180443	0.349872	0.40678	0.670078	-0.246407	0	-0.0460299
0.0209533	3.27401	-0.457667	0.866744	-2.45914	0.136373	0	0.875279	3.40581	1.08612	0.622267	0.0940259	0.0326744	-0.117185	1.14707	0	-1.07356	1.39186	0.27027	0.525856	-0.027416	-0.243945	1.82487
-1.05879	-0.084287	0	1.1441	1.23713	-0.20463	2.53637	0	-0.113572	-0.15444	-0.944644	-1.44094	0.0326637	-0.146675	1.39647	0.428266	0	0.188103	-0.27027	0.34904	-0.0548546	-0.20957	-0.680429
0.288627	0.00648614	0.913248	-2.34995	2.02847	0.20463	0.535238	1.44199	-0.227531	-2.34569	0.711747	-0.098926	1.10427	-0.0293608	1.14002	1.13316	-0.41437	-1.16414	-0.815222	-0.174368	-0.247219	-0.596179	-3.3321
0.720272	1.1607	-1.6037	-1.20829	0	0.0346618	0	-1.07954	1.694	-2.72671	-0.243179	-1.24848	-1.30041	0.287365	1.11649	1.25964	-0.260738	0.639254	1.35503	1.00713	0.0549904	1.60506	0.516312
0.402118	0.988812	2.50868	1.82509	-0.806456	-0.102825	-2.34034	0.936269	-3.12792	1.61294	0.19459	1.12115	-0.656601	0.157992	1.10416	-0.69784	-0.0847099	-0.618885	0.402956	0.551345	-0.828048	1.88588	-0.563382
-1.15222	4.93553	1.3423	-0.762485	-0.202634	0.571372	0	0.286328	4.07527	4.0758	2.363	1.3709	2.15062	0.151905	1.26949	0.27972	-0.950834	2.11152	0.133958	-0.0687522	-0.388781	0.0679117	1.58808
1.06569	-2.42803	2.41505	1.45935	0	3.65189	0	1.06649	-0.277701	1.82653	-1.62699	-1.70415	-1.4286	0.402016	1.40789	0.557105	1.05671	-1.26499	0.26738	-0.344472	1.10682	2.81143	-1.82376
0.553029	5.1872	-0.434783	0.763362	6.09825	1.63338	0	0	2.3634	0.451468	-1.84045	-1.56762	-2.44964	0.133647	1.70213	-0.836825	-0.367518	0.100924	3.79875	2.18439	0.548849	0.788959	0.423829
-0.218266	-1.80303	1.94181	-0.655662	-3.89154	0.559154	-1.46792	0.915177	0.703656	0.449439	0.0687724	0.579086	0.33456	0.0290301	1.92179	-0.98523	0.0778568	0.55884	0.25674	0.202361	2.7399	1.30125	1.26082
0.575839	1.44383	-0.858374	3.52522	-2.61321	-1.00013	-0.370371	1.4609	-1.57655	1.18872	0.977334	0.554355	0.333445	0.127632	1.41749	0.141343	-3.77784	-0.744319	-0.51414	-0.676135	-1.32683	-1.13767	-2.63297
-0.0147912	2.74054	-1.52012	-0.277489	-5.22585	0.150602	0	-2.23473	0.872892	-2.08963	-1.40054	-0.432491	-1.30677	0.49737	1.28194	0	-2.1313	0.381801	-0.193486	0.135593	-0.0539811	1.0083	-0.429697
0.716332	1.22078	0.65431	0.323662	-5.06159	0.483109	-2.44144	-0.637622	-0.763362	2.82547	-1.09085	0.393251	-0.710783	0.126838	1.05587	-0.141343	-2.57355	0.043989	0.450886	0.473134	-0.54142	0.645164	-0.864974
-1.56075	0.0736815	1.29591	0.0346161	0.450451	-1.77796	-0.571975	-2.08266	-1.71133	3.6001	-2.01437	-0.228612	-1.33358	0.0806312	1.22421	0.564176	0.560634	1.78782	-0.774197	-0.676593	-0.544367	0.641028	2.00676
1.56597	0.446593	-0.645858	0.701273	4.39631	-1.4955	0	0.723069	0.886924	-1.42453	0.284466	-0.840341	-1.35161	-0.0575871	1.4514	-0.140746	-1.38423	0.475532	0.516797	0.203459	0.0272889	0.82724	0.613065
-0.274186	-2.8898	0.21575	-0.597497	0	-0.874113	0	-0.578036	-2.79817	1.9887	0.667343	0.614789	1.24828	0.16116	1.46729	0.981087	0.827442	0.283802	0.51414	0.13541	0.299687	-0.253807	0.422238
1.08708	-2.69507	-1.52012	0.58604	1.91699	1.71643	0	0.289436	-1.14156	-1.55921	-0.809475	-2.82077	-2.23006	-0.0863036	1.47316	0	0.123143	-0.22552	-1.03094	-0.271003	-0.0816438	0.885521	-0.0936768
-0.365815	-0.244842	1.52012	-0.217927	2.91081	0.284571	0	2.07372	0.458191	2.6781	1.66242	0.591816	-0.38835	-0.0345423	1.56736	0.278552	0.00769142	-1.06902	-1.2382	-1.36614	0.299035	1.93333	-2.46692
0.406271	-2.36558	0.215285	1.0622	-4.61298	-0.279956	3.93678	0.915822	0.966741	3.14879	0.627523	-0.831743	0.141393	-0.0691204	1.76169	0	1.071	-1.26752	0.718722	0	0	0.830391	-0.192308
-1.49243	-4.93811	-1.7354	-0.409837	-2.38882	0.420215	0	0.210158	-1.42493	-1.63047	-1.028	0.390971	0.282187	0.270449	1.74836	-0.978345	-1.99822	-0.815188	-1.83974	-1.24569	0.0542741	-3.01593	-1.69866
-0.499168	-1.38603	0	-0.526136	-4.49514	-0.39599	0	-1.62261	-1.09669	-1.37933	0.290509	1.16383	0.105615	-0.0517316	1.6255	-0.846267	0.746315	0.348896	4.5374	0.208696	0.675952	1.62809	-0.245038
-0.491388	2.54352	2.37849	1.12892	1.14287	-1.02369	0	1.06121	0.0580215	2.87494	0.079992	-1.45876	-0.0703978	1.55741	1.5995	0.282886	-0.200532	-1.76517	0.442618	-0.417828	0.349698	0.0620925	-1.53279
0.457714	-0.426902	-0.213904	-3.10942	1.80185	-1.90937	-3.3648	0.281096	0.808785	-0.677051	-0.390567	-1.41293	0.491747	0.203574	1.8112	0	1.97988	0.016008	-0.442618	-0.069808	0.802358	0.526236	-0.199501
0.245368	0.344212	-0.429185	3.98998	-3.63676	0.236083	2.06969	0.838579	2.16286	-1.50585	0.948726	0.824155	-0.140252	0.0903444	1.99514	0.983845	-1.45242	-0.61318	-0.891158	-1.47734	0.531351	-1.83834	-0.902714
-0.270797	0.355714	1.49416	-2.80392	1.83491	0.974007	0	-0.208986	2.61199	1.91263	0.634105	1.06392	1.73917	0.450502	1.57896	0.557882	0.940194	-0.62005	-2.06726	-0.497337	0.844332	-1.20217	-0.657066
1.14316	1.78475	0	0.737076	2.69075	0.200461	0	-0.139567	0.383247	-2.05065	0.472954	-0.759843	0.721529	0.319749	0.862209	0.277778	1.71228	-0.314569	0.65062	-0.213904	0.0525348	0	0.253229
-0.929696	-1.03303	2.09651	0.800004	-1.11236	2.82769	-3.60229	2.07333	-0.82305	-0.415226	-0.157403	0.656902	-0.92864	-0.533484	0.715455	-0.695897	-0.532415	-0.195267	0.903815	1.20612	-0.315624	1.20217	0.202122
-0.425734	-1.72019	1.44184	-0.182295	-0.673403	-2.49448	1.5326	1.49358	-2.90686	-1.39667	-1.86828	-1.98004	-1.91878	0.0619178	0.633402	-0.982464	0.22531	-0.632581	0.0642467	0.772747	-0.263783	0.783089	-0.0504923
-0.670172	-1.04908	-2.69446	-1.67897	2.66682	1.6806	0	-1.35687	-1.02623	-2.56424	-0.0903206	0.389441	-0.706967	-0.0844428	0.338228	0	0.164905	0.892079	1.14944	0.349284	0.263783	0.993488	1.25472
-0.0666647	0.599905	1.04494	-0.628201	-0.439561	0.358606	0	0.816331	1.02623	1.00503	0.690382	1.97975	1.33899	0.151946	0.0230194	0.562589	-0.49177	-0.327776	0.0634719	0.139373	0.0526732	0.677342	-0.95215
1.51197	4.31731	0.207684	-0.620429	1.31293	-0.227847	-2.11343	-0.0677736	1.01581	-1.00503	0.863743	0.991695	0.174856	0.1461	0.00767195	-1.69735	-0.3657	1.32692	0.126823	0.555557	-1.00557	0.550797	1.44966
-0.193304	3.71219	-0.415801	1.68834	-0.873368	-0.0321005	0	-0.475706	-1.75592	1.00503	-0.724245	0.050778	-0.912607	0.185128	-0.138185	-0.285714	0.767556	-0.339882	-0.50826	-0.625219	1.1897	0.152462	-1.34901
1.04588	1.79984	1.65293	-2.06482	1.73917	0.877895	-0.389106	1.01661	1.41846	0.711747	2.10845	4.7273	1.33102	0.145617	-0.36943	0.285714	0.00374806	0.625165	-1.28207	0.139276	-0.0262847	0.273848	0.951196
0.577323	0.569637	-1.02988	1.31149	3.39016	2.74552	-0.586512	0.805914	-0.73509	-1.86118	0.95091	0.867804	0.382011	0.0335739	-0.38628	0.568992	-0.665604	-0.264605	0	-0.139276	-0.924343	1.44799	-1.40494
-0.947285	2.64821	-0.207254	0	-2.31833	1.96443	0	-0.873368	0.283367	-1.01671	-0.17398	0.485704	-0.416812	-0.240863	-0.442187	-0.568992	0.50431	1.12696	1.91699	1.38411	2.02239	2.27989	2.00107
0.233425	-1.39831	-0.624352	-3.01139	-4.13552	0.677566	0	-1.29034	-1.31019	-0.146092	0.299445	0.0989035	-0.174186	-0.00560837	-0.647403	0.852278	0.0750525	-0.184166	0.505052	-0.0687522	-0.0130014	1.8562	-0.845566
-0.0156534	1.07604	0.831606	0	-0.22247	-1.20376	0	0.816887	-0.863812	1.4514	0.356232	1.05792	1.35067	1.16536	-0.817165	-0.141543	-0.0412719	0.796365	2.36476	0.821922	-0.0650322	2.21663	0
-0.550075	-3.62691	0.206825	2.19372	0	0.834745	0.195886	1.81396	0.519182	3.26039	-0.336944	0.370333	0.27482	-0.355418	-0.951256	-0.283688	-1.76808	-2.02674	-2.74331	-2.13728	-3.19922	-0.733431	-2.37565
-0.00688693	-3.37396	-1.24742	-1.17982	-1.11983	0.888923	2.1298	1.12547	1.54157	-0.559442	0.00964274	-0.424314	0.819957	-0.0667817	-1.14552	-0.142146	1.24508	-0.186792	1.13138	0.486619	1.12211	1.12614	0.255428
1.34636	3.79585	-0.419288	1.15636	1.3423	-0.611498	0	-0.461895	-1.77198	-0.703733	0.596041	0.632445	0	-0.379274	-0.841429	-0.570615	0.534258	-0.0615716	0.124922	-0.347343	0.0132829	0.363281	0.203874
0	0	0	0.210946	-0.22247	0	0	0	0	0	0	0	0	0	0	0	0	0	0	0	0	0	0
-0.471912	-1.60918	0	0	0	-0.678189	0	0	1.03271	0	0.0191681	1.06739	-0.75137	-1.02225	-1.82017	0	0	-0.949136	0	0	0	0	0
0.0159289	4.24631	0.209864	-0.105417	-2.02482	0.616725	-0.962471	-2.27435	0.682597	-2.28581	-2.58217	0.0265393	0.171262	0	-1.0062	0.712761	0.329662	-0.266944	-1.76327	-2.39448	1.25389	2.20699	-1.28108
0.262947	1.90106	1.86921	1.19985	2.46926	1.67505	-0.387597	-0.747032	2.02027	1.00648	-0.216578	0.255081	-0.721281	0.124125	-0.982664	-0.855925	0.0149589	0.0771211	-0.127146	-0.214056	0	0.299687	0.30896
-1.14348	-0.0894454	-0.412372	-0.673873	0.662986	0.211921	0	-0.136426	-1.39862	1.27934	0.716849	-1.1547	1.33541	0.914889	-0.669012	0.57143	1.28924	0.371528	0.127146	-0.429492	-1.0151	-0.163354	1.0739
-0.59004	-0.80863	0.82305	0.383967	-1.55386	-0.514686	-0.194364	2.09396	0.617806	0	-1.32974	-0.718823	-0.956945	0.0670241	-0.331929	0.992212	0.15861	1.01119	2.2614	1.70701	1.59057	0.516376	0.152478
-0.290707	-2.21192	0.612872	0.0348331	0.223464	-0.943902	2.6873	0.666225	-1.58017	1.8195	0.277255	-2.45713	-0.931523	-0.134093	-0.187729	0.562589	-0.254636	-0.583851	0.865806	0.702744	-0.0260858	-1.47463	-0.764725
0.148762	2.39219	1.41559	-1.17944	4.36751	-1.32333	0	1.05681	0.227273	0.691088	0.424294	0.671455	0.518584	0.40731	-0.213758	-0.562589	-0.51494	0.374734	-1.55138	-0.280505	-0.785756	-0.137646	-0.256213
0.72313	-0.717335	-0.402415	2.10387	-0.213904	-0.435193	0	-0.0657246	0.847702	0.82305	-1.47798	-1.60518	-1.63397	0.0167033	-0.523494	0.28169	-1.06793	-0.435781	0.436818	0	-0.527288	0.959569	-1.49912
-1.50278	-0.699681	-2.2427	0	-0.644471	-2.07418	0	-3.34256	3.91774	-2.07047	-0.380457	-0.749093	-0.315956	-0.329012	-0.517599	0.840341	0.217497	-0.886659	1.48334	-0.846267	0.290353	-0.21852	-0.731838
-0.155596	0.136908	-1.45382	0.195346	-0.21575	1.91775	0	0.542374	-1.80185	1.52252	0.400441	1.6137	0	0.295602	-0.433389	0.417537	1.21376	1.56995	0.122624	0.916467	-0.502049	-0.0820681	2.64059
0.0590017	0.500399	1.65979	0.0917958	0	0.212166	1.50379	-0.474416	0.165153	0	-0.350298	-1.75434	-0.387529	0.704795	-0.513827	0	0	0.642046	0	0	0	0	0
0.168147	-0.974672	2.03673	0.354915	0	-0.254872	-2.07359	-0.340252	-1.44047	2.174	0.0701579	-1.00784	-0.601878	0.1492	-0.279794	-0.278164	0.0074011	-0.260454	0.122474	1.73917	-1.41392	1.52094	0.306123
-0.832506	-0.33276	-0.201816	-0.872365	0	1.77384	-0.956945	-0.752655	0.445435	0	1.2446	1.53773	1.65526	0	-0.201586	-0.418703	-1.049	-0.805499	-0.860485	-0.483928	1.59918	0.537636	-1.48835
-0.145026	-1.98498	0.403226	-5.24225	-4.86822	-0.978561	0	1.63491	-0.166806	-0.269179	-0.535769	-1.0626	-0.384952	0.396782	0.052627	0	1.25601	-0.648173	-0.619197	-0.555943	0.0528681	3.96846	-0.778618
-1.00992	-5.81693	-1.82746	4.30404	-1.83071	-0.384304	0	0.740495	-0.167084	-1.63047	-0.199164	-0.247919	-0.351247	0.493774	0.218981	0	0.375954	-0.0411358	-0.124301	-0.418995	0.0264236	2.54402	-0.679741
0.124808	1.67584	-1.65293	-0.829686	0	0.423414	0	-1.0789	0.44494	-0.825314	0.566574	0.68911	0.456381	0.578446	0.00874929	0.696867	1.85886	0.814898	0.37244	0.766821	-0.291044	4.99737	2.79377
1.02141	-0.563692	0.82988	-1.22788	-1.39537	0.355629	1.52675	1.27991	2.57478	-1.531	1.104	0.105597	1.07996	0.15224	-0.297906	-0.417537	-0.521363	-0.127903	0.86367	0.898727	0	0.357782	-0.306592
-0.201164	-1.41083	-1.45684	-0.404714	-2.60988	0.594581	2.06193	0.200602	2.19319	-2.98955	0.605944	1.41475	0.518404	0.081462	-0.563183	0	1.28401	0.653205	1.09958	1.33313	0.515363	-4.72913	1.32183
0.383507	5.21467	-2.33309	-0.274709	-1.2092	-3.53918	0	-1.00706	-0.105876	0	-0.870975	-0.448455	-0.761249	-0.0705965	-0.362463	-0.840341	-0.502983	-0.455256	-0.243309	-0.101919	-0.224319	-6.60374	-1.52675
0.573349	-4.42017	-0.214823	-0.383464	-2.46318	-0.939594	-0.744882	-0.27027	-1.38669	-2.33929	0.558688	0.465796	0.0694444	0.0923085	-0.159546	0.280899	-0.252443	-0.437243	-0.610875	-0.477003	0.290199	1.45602	-0.772205
0.448501	-0.68861	-1.29872	-0.638364	-1.00251	0.64042	0	1.07673	-0.484523	0	0.623601	-0.472765	-0.417392	1.551	-0.382172	0.698815	0.85572	0.356416	0.732604	1.28946	0.210526	5.49659	0.154919
1.03907	0.552505	-0.436682	-0.837231	-0.758537	-0.220488	1.66825	-1.00909	-0.704038	-0.444775	-0.145808	0.125361	0.24369	0.39999	-0.205019	1.24569	-0.7186	-0.358734	-0.243605	-0.948517	1.30584	-1.2264	0.206186
0.523512	-1.39644	-0.219058	-0.0365608	-2.57084	1.34665	0	2.53685	-0.435731	-0.895528	1.45819	0.907648	0.0347645	0.0266092	-0.348604	-0.137646	-0.694749	-0.332882	0.970881	0.33979	-0.520293	-1.80414	-0.206186
0.697236	-0.0188353	0.65574	0.425714	1.8065	0.658897	0	0.722499	-0.437637	-0.752449	-0.268792	0.673658	0.243013	0.29754	-0.170274	-0.968866	1.06907	0.498908	1.08109	1.21377	0.882893	1.02042	0.617286
0.688546	-0.0502449	0.217628	-1.31951	1.27067	0	0	-0.130976	-0.164609	-1.36884	0.937626	-0.0274076	-0.138793	0.45522	0.206084	-0.837994	0.886987	-0.250303	-1.08109	-0.605044	1.79354	-0.508907	-0.35962
0	-0.157178	0	-1.83696	0	0	-0.183993	0	0	0	0	0	0	0	0	0	0	-0.0170186	0	0	0	0	0
0.208983	-1.04998	-1.53344	0	0.503779	0	0	-1.65184	-1.71702	-1.69888	-0.219267	-2.76531	-0.487296	1.36378	-0.152282	-0.562589	-0.0498629	-1.87261	0.722025	-1.08476	-0.356144	-0.255428	-1.87018
-0.106366	-2.53716	0.879127	-1.52733	-2.03053	-0.0626178	-1.67135	0.59781	0.445932	-0.468385	-1.35481	0.681039	-0.349528	-0.031263	-0.29627	0.140944	0.391112	-0.900297	0.47847	-0.82136	0.559087	-1.18345	-0.157439
0.498076	2.5753	-0.438597	0	2.53178	-1.03834	0	0.0662032	1.9279	-0.627946	0.857299	0.12587	-0.245399	-0.0729851	-0.216022	1.67602	-1.02726	0.112088	-0.95924	-0.551345	0.0506714	-2.19789	-0.315624
0.754718	-1.36309	-0.661524	1.5148	2.95588	2.12799	0	-0.265076	-0.656817	-0.949374	-0.828282	-0.346524	-1.23611	-0.167023	-0.135251	-0.69493	-0.77743	-1.11773	0.720291	1.168	0	1.83491	-1.32593
-0.0724198	-1.95192	0	0.11269	2.16095	0.493362	0.187091	0.463424	-0.716454	-1.76428	-0.319659	-0.799117	-0.142248	1.26656	-0.14447	0.278552	1.2567	0.0618452	-0.359497	-1.86148	-0.788307	0.518136	0.106724
0.222175	-1.03689	-1.33632	0.274931	0	1.5594	0.930239	-1.46377	0.165792	-0.812352	0.261615	-0.30797	-0.785999	0.319292	-0.189934	0.83103	-1.06178	-0.0497944	0.119976	-0.418411	-0.255624	-1.43138	-0.106724
0.486108	-0.225974	-0.449439	0.783148	-2.89177	0.514091	0	0.133958	-0.720424	0.974034	-0.0677605	0.187727	-0.503417	0.0976437	-0.108696	0	-1.43103	-0.067503	0	-0.630917	-0.256279	-0.262467	0.426213
0.184399	-0.466854	-1.36057	-1.58506	0.487806	0.391229	-0.930239	-1.61947	-1.40019	-1.30083	-0.0968805	0	1.00431	0.174493	0.162999	0.687288	-0.454646	0.817409	0.59773	1.25788	2.10748	0.0262778	1.37278
-0.517177	0.772462	2.03397	-0.529769	-1.22401	-0.210227	0	0.135962	0.394034	2.26547	0.145286	0.634945	0	0.302076	0.234975	0.273598	-1.58534	-0.117277	0.119119	0.898727	0	-0.817839	-0.315126
0.345713	-3.2907	-1.35137	0	0.246003	0.541046	-1.31705	-0.54496	0.224467	-1.28826	1.69862	0	0.391808	0.0511091	0.180375	1.08697	-0.11207	0.0973415	0.47506	-0.275672	-0.756624	0.158814	0.315126
0.0854538	1.83404	-1.14026	-1.22154	-3.50036	-0.0904977	0	0.204708	0	-1.7989	-0.0666318	0.0457014	0	0.193977	0.225012	0.269906	0.320932	0.524965	0.825963	1.98162	0	-0.690024	0.731456
0.890853	2.57804	-0.921666	2.2157	0	-1.38873	-1.52675	-1.02776	-0.787849	-1.49629	0.0190422	0.749329	0.531822	0.157966	0.278314	0	0.490598	0.158538	0.585825	0.337724	0	-2.5352	0.104058
-1.33943	0.373196	0.692044	-0.98151	8.29744	-0.334686	-0.385357	-1.94721	-0.623408	-0.672271	2.0355	2.63368	3.03001	0.902231	0.821433	0.13468	-1.4866	0.79837	-2.96406	-3.08138	0	-1.68025	1.13755
1.38722	0.605924	0.687288	0.101112	-10.3541	1.57381	-2.7399	0.699793	1.91447	0.168492	0.270157	-1.15853	-0.240426	0.367675	1.08778	1.86672	0.54042	0.108376	-1.82154	-0.0695652	0.252845	0.388135	0.921194
-0.584359	-0.331826	-1.14812	1.66618	0.518136	-1.57381	-0.997017	-0.419288	0.556175	-0.845314	0.0279057	0.613404	0.480275	1.54152	0.92804	0.263852	0.582178	0.115315	-0.245399	0.277971	0.554018	3.1593	0.254388
0.0703288	-2.03437	-0.462964	0.853596	-1.03897	0.546893	0	-1.48151	-0.277701	0	-0.531544	0.405722	0.307535	0.710342	0.478158	0.263158	0.0446429	-0.437648	-0.492612	-0.976298	-0.402618	2.48888	0.0508001
0.216641	-0.0266081	0.462964	-4.652	-1.31408	-0.182321	-2.22907	0.778765	2.3634	1.34909	-0.290276	0.387137	0.950771	0.12772	0.717283	-1.32277	-0.119092	0.0629758	2.07704	1.66786	0.251826	-2.00746	0.405474
-0.112494	-0.553722	2.05722	1.61294	1.31408	-0.792847	0.408999	0.632691	1.88329	1.00001	0.411754	0.611602	0.404722	0.548322	1.02802	1.84702	0.342008	2.22495	0.362101	0.54983	0.376554	-1.01905	3.43061
-0.120782	2.60818	0.67644	-0.445435	1.03897	-0.954359	0	-0.351001	0.159787	-0.832644	0.809194	0.225449	0.134544	0.0488114	0.958487	-0.787406	1.53203	1.22389	-0.120555	-0.205832	0.125203	-0.811912	2.27118
-0.703745	0.351334	-1.81411	0.80036	-1.82534	-0.154329	0	0.561011	-0.213106	0.167084	-1.04294	-1.2412	-0.640704	0.787444	0.82388	0.131666	1.11213	0.122329	-1.45811	-0.206257	-0.300752	0.135777	-0.0477897
-1.00973	-0.788972	-0.458716	0.819109	-0.792607	-4.62911	0.813013	-0.701757	-0.106724	-1.34456	-0.178011	0.526094	0.304003	0.526355	0.792232	1.30721	0.0216834	0.172222	1.33741	1.09515	0.225649	-1.61404	0.38168
0.656627	2.8778	-0.46083	-2.13098	0.792607	-1.76762	-0.609139	0.211045	-0.374432	1.01011	0.374392	-0.884059	-1.05104	0.144384	1.06582	1.16205	0.281457	-0.0379089	-0.241838	-0.683063	0.225141	2.42486	0.711747
-0.456923	-0.331295	0.46083	-2.17738	-1.32452	-2.40571	3.40373	1.3957	0.374432	1.66117	-0.515151	-0.523911	-0.649686	1.57461	1.17648	0.639797	0.696617	-0.343351	1.0837	0.478633	0	1.20403	-0.378968
2.42092	-2.49415	0.229621	-1.01403	0.266312	0.573224	-1.98814	-0.277585	-2.76066	1.30935	-0.0281756	0.417981	-0.861332	1.00802	1.23503	0.508907	-0.150403	0.395661	0.477898	0.882858	-0.501003	0.636269	0.189663
-0.0432488	-0.183366	-5.41947	0.171924	0.265604	-1.28723	0	-3.24887	-1.49298	-3.47429	-0.367007	-1.28692	-1.18345	0.87724	1.14068	-1.40577	0.927452	-0.186624	0.594179	0.0675904	-0.0502386	0.632247	-0.760822
-0.364155	-1.13383	-1.21804	-1.24985	1.57898	0.513073	-3.05834	-0.143678	4.20024	0	-0.00942818	0.0242395	0.0700035	0.772848	0.569442	0.385357	-0.0213061	0.914608	0.590669	1.1421	0	0.445435	0.902833
0.100837	0.548744	-0.491401	-1.0491	2.06726	0.556622	0.206825	-0.938974	0.532766	-0.50633	-0.83318	-0.444168	-0.631803	0.128997	0.558375	0.51151	1.40356	0.0203135	0.704228	0.930858	0	2.60626	0.471922
-0.569513	0.263383	-0.990107	-0.420026	1.52287	0.352071	-0.621764	-1.02116	-0.266028	1.34456	-0.400115	-0.652468	-0.458797	-0.355142	0.516271	2.02027	0.656198	-0.800609	0	-0.597413	0.225875	1.24037	-0.424629
0	-0.10527	0	-0.653864	0	0	-1.88883	0	-0.695004	0	0	0	0	0	0	0.249688	-0.348505	0.135648	1.27834	0.0665557	-0.251004	-2.41896	0
-0.391146	-0.528019	-2.51902	0	1.00251	1.17014	0	-1.62605	-0.699868	-4.26322	-0.545586	0	-1.3533	-0.858454	0.381576	0.745345	-0.489957	-0.463781	0.230681	-0.133156	-0.0754243	-0.361477	-0.854706
0.675682	0.948436	-0.255428	-2.12715	4.86714	0.56143	0	-1.88046	0.967749	-0.699304	-0.12485	-0.108576	-1.154	-0.340779	0.457525	-1.62199	0.140233	0.0920163	0.345026	-0.133333	-0.0125762	2.27602	-0.0476985
-0.992802	-0.0655738	-1.8065	-0.139704	-5.11683	0.184131	0	-0.838739	-1.18408	-1.94869	-1.09185	-1.66788	-0.472642	0.112165	0.640113	-0.378072	0.105046	0.622115	0.229358	0.333001	-0.0125778	-1.27228	0.380953
0.0496064	-4.49438	-1.31063	0.654918	-3.04592	-0.882036	-3.88818	-0.383583	-0.162558	0.178731	0.65847	1.05626	0.834699	0.340398	0.651318	-2.42823	0.502689	1.06696	-0.805065	0.530505	-0.517058	-1.41846	1.97653
0.2193	-0.419403	-1.59578	-2.36099	-0.258065	0	-4.27512	-2.64813	-0.652886	-4.00782	-2.07721	-1.64952	-0.980578	-0.111784	0.533213	-1.56457	-0.0836062	-0.194509	0.115407	-0.397615	0	0.673055	0.18622
-0.320435	1.45009	1.06668	-0.398975	-2.08885	0.565677	0	0.157729	-0.16389	2.02399	0.246051	0.959608	1.23324	1.40678	0.568162	0.393443	-0.72753	-2.05787	0.115274	-0.800004	-0.0632391	-0.154919	-2.68694
0.617222	-1.10619	-2.14485	0.142674	1.31063	1.01965	1.59639	-1.82908	-0.273748	-1.09891	-1.15677	-1.22162	-0.723592	-0.391354	0.301705	0.652318	0.0912313	-0.799703	0.688866	0.200602	-0.507358	-0.129283	-0.526947
-1.0104	0.24688	0.809721	-0.500251	0	0.160715	-2.05722	0.320513	-0.715271	-0.184332	1.30411	-0.172656	-0.218103	-0.300307	0.435862	0	-0.813485	0.290075	-0.573725	-1.20969	-0.0254356	-0.12945	-0.240443
-0.164575	0.696201	0.268457	0.243292	1.29368	0.100889	0.919547	-0.722605	-1.11051	-0.555043	1.90556	-0.0252039	0.435731	-0.934391	0.486219	1.03494	-0.0672055	0.172722	1.93738	1.20969	-0.0254421	-0.519482	2.04915
0.672475	2.84316	-2.16811	0.0571592	-0.515465	0.567888	0.684153	0.0805477	0.111607	-5.3346	-0.00963066	-0.00720228	-0.54496	0.172659	0.119323	0.896867	-1.11725	0.294856	-0.565932	0	0	-2.85281	-1.85675
0.887047	0.71803	-0.549452	0.185542	-1.30041	0.492144	0	0	1.76898	-4.19642	1.44383	1.0033	0.399928	-1.69272	-0.291099	0.508907	0.609986	0.421243	0.339944	-0.200602	0.228746	0.880358	0.622757
0.108571	-1.56786	-1.66671	-0.214118	0	0.172189	0	0.961546	-0.219419	-0.20429	-0.714527	-0.536233	-0.436364	-0.189861	-0.464525	1.01011	0.110185	-0.566647	-1.36676	-0.469642	0.506458	1.45026	0.381316
1.12567	2.95627	1.66671	0.285388	-0.524936	-0.452631	0	0.159363	-0.771779	3.21959	-0.748564	-0.423866	0.943061	0.0759878	-0.44406	0.501254	0.0319665	0.0122527	0.229095	-0.0672721	-0.126374	-0.262123	-0.0475851
-0.126858	1.62449	-1.38698	-0.128324	0.786374	-1.7306	3.13225	0.238569	0.606898	-0.396826	-1.01661	-0.83138	-0.216841	1.10477	-0.40059	-0.125078	1.96571	-1.2568	-0.573725	-1.1506	0.529702	0.575767	-2.40859
0.143245	0.432158	0	-3.49894	1.03897	-0.727977	1.74677	0.15873	0.548548	1.96857	2.37523	0.939313	1.43681	0.538504	-0.645825	0.623832	-0.593722	0.730114	0.802297	0.271924	0.0251541	0.208551	0.0487448
-0.508006	0.468177	1.38698	-1.84914	2.80273	0.199065	0	1.65163	-0.934329	-2.36697	0.426723	-0.823228	-0.859604	3.58688	-0.657696	0.866878	-0.0595666	0.396427	0.909097	0.878681	-0.0251541	-2.10534	0.34055
0.358259	0.11355	-1.38698	0.525408	4.66342	-1.93992	-0.43384	-0.940446	-1.61428	-2.62907	-0.731282	0.54236	0.466536	1.00418	-0.438311	-0.494439	-0.425002	-0.411824	0	-0.0673174	-0.504415	-0.801072	0.0485555
0.800269	0.747467	-1.69018	-1.41739	-2.4273	-3.01653	0	-0.790518	0.168209	2.22907	-0.592736	-1.32856	-0.610524	0.338425	-0.65721	0.740744	0.767899	-0.354788	-0.681047	-0.337268	0	1.64854	-0.194364
0.230104	5.33094	0.283688	-1.20695	-2.99274	0.935376	0	-0.477328	-0.730956	0	-5.98638	-0.0255825	0.0360166	0.0488878	-0.778759	-1.36225	-0.30435	-0.63481	0.227531	-0.542007	0.277743	-2.42905	-0.243487
-0.253758	-0.42213	-2.00293	-2.37977	-2.30484	-0.727842	0	-3.32418	-0.339175	0.599402	-0.377378	-2.31468	-0.577828	0.0710669	-0.847928	-2.14249	-0.660857	0.6688	-1.02799	-0.681666	-1.01369	-0.54186	-0.537767
-0.103283	-2.38767	1.71924	0.439768	-2.62482	1.3121	0	1.79743	-0.226757	2.55668	0.407914	-0.498754	0.25321	0.204036	-0.799529	0.761425	0.632824	-0.463733	-0.4603	0.204988	0.482786	0.514837	-0.836825
0.216894	-0.00610221	0	2.24694	0	-0.447547	0	-1.05821	-0.912207	1.54146	-0.940702	-0.225819	-0.870833	-0.235122	-0.565896	0.252525	-0.971976	-0.353694	-2.8072	-0.753686	0	-0.43337	-2.04751
0.538659	0.140257	1.96912	-0.722802	0.530505	-0.17183	0	1.05821	0.400115	3.01341	-0.422094	1.63687	1.37534	-0.262391	-0.633446	-0.632513	-1.1711	1.82646	0.236967	0.206115	0	1.66895	1.10387
0.351925	-2.66155	-0.558661	0.338983	1.83491	-1.14497	0	0.806456	-1.61016	-3.58868	0.422094	1.1352	0.930239	-0.276477	-0.767092	-1.1487	0.460822	-0.0397687	0.82499	0.615808	0.0253453	0.929992	-0.249813
-0.263446	-1.24053	-2.26639	-1.31611	-0.782273	0.695855	0	0.160514	0.462696	0	0.276994	-1.12779	-1.07412	-0.721539	-0.936527	-2.20645	-0.053475	0.307032	0.585139	0.612039	0.505562	-1.84177	-0.150188
0.184333	3.43788	1.4225	0.264612	-1.58315	1.34255	0	-1.53538	0.40311	-0.578594	0.490548	0.355188	0.179824	0.341251	-1.01148	-0.394478	0.00356589	-0.337634	0.813485	-0.271555	-0.0378286	0.483742	0.10015
0.408282	-1.92236	0.563382	0.465261	0	-0.136932	0	0.406339	-0.692044	-2.54666	-0.746998	-0.633558	-1.37484	-0.242348	-0.896644	-0.660941	-0.396592	0.635363	2.17524	0.13587	0.641149	0.534761	0.2
-0.0806735	0.584943	-0.281294	-2.4592	0.530505	-0.103424	0	-1.38834	0.231214	-3.02138	0.215462	0.592924	1.91238	0.188544	-0.879513	-1.33513	-1.22104	-0.25046	-0.226757	-0.13587	0.512469	-1.0185	-1.25661
0.0549015	-1.05412	1.12046	1.10394	-0.264901	2.16977	0	0.982005	-0.462964	1.82376	-2.10251	-2.29852	-2.53361	-0.0852496	-0.827917	-0.269179	-0.866247	0.0563891	0.113443	-0.204151	-0.087309	0.644471	0.454202
-0.3326	2.54448	1.10804	0	0.264901	1.00164	0	0.0814001	0.0579878	0	1.8254	1.22125	0.548347	-0.256186	-1.24628	0.671594	0.757469	-0.579118	-0.454546	-1.50998	0.261699	-0.0535475	-0.707431
0.387471	-0.0611471	-1.38698	-0.581991	-1.06384	-0.80051	0	0.971668	-0.931865	0	-0.887794	-1.21368	-1.21036	-0.659204	-1.48843	0.667114	0.751775	-0.528557	2.25235	0.138217	0.459428	-0.941753	-0.355601
-1.42823	-2.57743	1.93644	-0.395164	1.32804	-0.637722	0	1.36057	-1.35495	1.79109	-2.19098	1.56414	0.331553	-0.290342	-1.45783	-0.266312	-0.642996	-0.242935	-0.222966	-0.345901	0.0123877	0.296936	-1.22889
0.586703	0.924602	-0.549452	0.253085	0.263505	-0.134902	0	-0.637961	1.41345	0	2.14949	0.70095	0.220426	-0.295744	-1.68611	-2.02027	1.98069	-0.0780185	-3.17487	-1.04494	1.4755	2.13341	0.513876
-0.88505	0.545738	0.549452	2.17213	0	-0.101889	0	0.796817	1.33606	0	-2.55306	1.7003	0.47593	-0.543716	-1.72418	0.271739	0.00710555	-1.30361	1.03153	-0.632247	0.280334	-0.661816	-0.771807
-0.0249796	-0.626611	1.08993	1.83801	2.08341	-0.439545	0	0.947874	-1.86377	-0.593474	-0.383837	-0.729345	-0.182782	-0.0412418	-1.90359	1.07963	0.863111	0.0782595	0.681821	-0.21164	0.255273	-0.399202	0.360918
0.678396	-0.0124479	-1.63938	1.25181	1.78804	-2.02044	0	1.25002	-1.30179	-2.00408	1.88365	0.368984	0.219298	-0.247809	-2.07379	0	0	-0.153446	0	0	0	0	-0.567743
-0.0474945	3.64254	-1.10804	0.329194	-0.762393	4.79608	0	-0.936044	1.88796	-0.202634	0.408014	0.715807	0.218818	0.0183773	-1.60341	1.20081	-0.331628	0.556295	0.564654	0.493132	1.41043	1.06102	0.722025
-0.413695	0.77719	0	0.847904	-1.80185	-0.860601	0	-10.9199	-0.703815	1.20969	0.0417537	-1.15436	0.581186	-0.151714	-1.37409	-0.531916	-0.176847	-0.0436416	-0.112676	-0.211045	-0.263694	-0.529102	-0.257268
0.497025	0.249807	2.47605	0	-1.0444	-1.17132	0	7.573	0.176419	1.78754	0.644962	0.518742	-0.617622	0.40406	-1.55257	1.19286	-1.42615	0.517018	1.23251	0.561799	0.287632	-1.06668	0.769827
-0.404433	0.951853	-1.64387	-1.46228	0	1.00416	0	0.242817	-0.471143	-1.18813	1.46168	-1.70511	1.01524	0.128223	-1.48597	0.263158	0.665691	-0.125704	0	-0.280505	0.477556	0.801072	-0.255951
-0.518205	0.92539	0	0.494791	0	0	0	0	0.881581	0	0	0	0	0	0	1.04576	-0.579546	-0.0497045	1.43728	-0.0702494	0.475286	-0.292982	0
-1.20958	2.82227	-1.67135	0	0	-0.637307	-3.09075	-4.97203	0.815855	-1.40424	-5.1799	0	-3.33792	1.16476	-1.32371	0.906155	0.215038	-1.73881	-2.66979	-0.776018	0.236799	-1.04573	-2.07154
-0.275046	-2.89225	-1.98588	-1.90252	0	0.310358	0	0.0849257	-0.815855	-4.1243	2.73873	2.29002	2.06726	0.126577	-1.14428	0.51414	-0.819618	0.208462	-1.47646	-0.283688	0.236239	2.79088	0.156863
-0.482054	0.523683	-2.31894	0.607905	0	-0.469437	-0.900907	-3.1913	-2.00952	-1.48465	-1.04206	0.426532	-0.256082	0.702294	-0.811997	1.77895	0.324336	0.135583	1.25073	-0.142146	0.494293	1.66367	-0.0522603
-1.11001	-2.4082	0.584797	-1.11222	0	0.377841	0	-0.968744	-0.478756	0.851069	-1.26712	-0.466387	-0.735297	0.612717	-0.230222	1.37588	0.620507	-0.22002	0.225734	0	0	0.923794	-0.209315
-1.02581	-1.39486	-2.65895	0	0	-0.194039	-1.82653	-0.888895	-0.300391	-1.49416	-0.731343	-1.22142	-0.666422	0.502569	0.366013	0.248139	0.121498	-0.994133	-0.338792	-0.142349	0.234522	1.79729	-0.525211
0.420632	-0.495559	-0.600602	0.854315	0	0.0517805	-1.15876	-2.25743	-0.664053	-1.29872	0.0971031	-0.168888	-0.708297	0.239277	1.0281	0.247525	-2.06394	0.130681	0.225989	-0.643089	-0.258004	-5.17423	4.73096
-0.317641	-4.19434	-0.604231	1.31293	0	0.2937	-0.701757	-0.641321	-2.14272	-1.75829	-1.10606	-0.585972	-1.20438	0.190127	1.02786	-0.247525	0.530872	-0.561384	-3.44466	-0.936269	0	-0.982352	-4.94182
-0.686897	0.359474	-1.21953	3.53498	0	-1.03412	-1.41846	-2.13663	-0.745345	-2.24225	1.27846	-1.48201	-0.531512	0.26469	1.24995	-0.746272	-0.490776	-0.794338	-1.1751	-0.289855	-0.920143	-1.69518	-1.86424
1.01127	-0.428996	-0.924506	0.778438	0	-0.331238	0	0.374883	-2.52539	-3.22609	-0.767281	-1.13938	-0.228659	0.334272	1.18463	-1.00377	0.0874253	-0.686035	-2.02992	-1.31485	0.48472	-0.135777	0
0.00288574	-1.18932	-0.933133	-0.503852	0	-1.05802	0	2.58555	-0.448575	-1.65293	0.73498	0.669354	-0.458892	1.00486	1.1313	0	0.0145635	0.254876	1.43715	0.586512	-1.94111	-1.9205	-0.161421
0.46033	1.18299	-0.312989	-3.59989	0	-1.42956	0	-0.731934	-2.0111	-4.62933	2.18361	0.567511	1.02956	0.00434698	0.903739	-0.379028	1.14746	-0.039731	-0.476759	-0.366167	0.252207	0.276625	1.17774
2.10802	-0.322979	-0.628933	0.104673	0	-0.343171	-2.40976	0.0917852	2.26767	0.745345	-0.61298	0.571761	-0.570669	0.065182	0.934404	1.25788	0.391531	0.257565	0.595594	0.146628	-0.120019	-0.110558	-0.8015
1.19874	-1.2896	-3.2054	-3.03467	0	0.64385	-0.2442	-0.829116	-1.48438	-2.76053	-1.34474	-0.332195	-0.919899	0.0173747	0.896953	-1.00503	-1.2518	-0.756761	-2.40396	-1.55042	0.0360209	-0.972635	-0.484002
1.77416	-1.28692	-1.31149	-0.804335	0	-0.386056	-1.72631	-5.31939	-1.30892	-6.3013	-0.69003	1.21146	0.461007	0.0173717	0.564892	0	-0.0508351	-0.771566	0.121581	0	0	-0.728703	-3.34369
1.80641	0.324908	-1.32892	-0.842176	0	0.644622	0	-10.9162	0.591135	0	-1.05499	-0.54817	-0.84681	-0.256539	0.381171	-0.252845	-1.6073	-0.340626	-1.96325	-1.12235	0	-4.31101	-0.895863
-0.957613	0.859151	-3.05627	-2.84349	0	-1.18173	-0.749067	-0.764613	0.392157	8.81399	0.0983553	1.98572	-0.193461	0.304295	0.152062	0.252845	-0.0443001	0.723472	0.494439	0.600152	-0.21632	0.585653	-0.225225
2.05064	3.2962	1.02917	0.402027	0	-0.209998	-0.754721	0.109589	1.61763	0.987662	2.21451	1.76478	0.347961	-0.0651282	0.464258	0.252207	0.11809	-0.327008	1.22551	-0.675425	0.480078	1.59308	-0.565293
-1.18662	-2.8918	-0.684934	-1.81381	2.59082	-1.55236	-1.78349	-1.21214	0.830941	-6.60138	-0.0106843	0.467532	0.0771605	0.039082	0.70645	0.251572	-0.554756	0.0131337	-1.71994	-1.36469	-0.21575	-0.431966	-0.568506
-0.706235	1.88475	-2.08341	-0.196303	-2.59082	2.38972	0	-1.45173	3.37955	0	2.07261	-1.50675	0.384912	0.0651028	0.505572	1.12431	0.377568	-0.216927	-0.621506	-0.459067	-0.698377	-2.01144	-0.11409
0.00900893	1.88691	0.350263	1.04252	-0.526317	0.692481	-0.774197	1.45173	1.40546	-14.0681	-1.07324	1.34283	0	1.2761	0.521611	0.619197	0.309872	0.129884	-2.01518	0.153257	0.722373	-1.81256	-0.11422
-0.50334	1.39066	-1.40847	-0.43849	1.31063	0.686517	0.516797	-1.78976	-1.65192	-1.5221	-3.61913	-4.07269	-1.86124	0.0941983	0.611283	1.22701	-0.999453	-0.364596	-1.40938	-0.460477	0	-2.21322	-3.01647
-3.59177	3.14996	-1.06953	-0.113997	0.519482	0.13698	0	0.225479	0.9211	0.611623	-0.472762	-3.38887	0.818558	0.0855578	0.607569	0.365186	0.144984	0.0881845	-0.517466	-1.78507	-0.57748	-1.32698	2.09798
-2.38417	2.8878	0.714289	1.37554	0.774197	-1.16914	0	0.673403	0	0.910477	0.308099	1.49891	-0.623055	0.686087	0.448698	0.484849	-1.21091	0.0889299	0.775198	-0.313726	-0.945576	-0.435866	-1.51078
-0.823889	-0.0171836	-0.356507	-0.354211	0.25674	-1.60429	-0.258065	-1.35137	1.99704	0.902262	-1.39398	-1.87621	-0.981362	0.402637	0.255498	0.120846	0.498848	-1.74019	-1.81823	-1.90331	1.21067	3.22361	-1.05946
0.637572	5.04337	2.81709	0.947114	-2.07261	1.08296	0	4.10941	2.77714	1.78046	0.633019	0.810592	0.51151	0.207044	-0.0455768	0.241255	1.01252	0.64281	-0.921666	-1.61424	0.252389	0.902262	1.00089
-0.676667	-1.24961	3.4133	2.60205	1.04168	0.486085	1.79262	-0.874323	0.34904	11.3854	-1.607	-2.05651	-1.14467	0.278199	-0.127726	0.48077	-0.583179	0.726311	2.86851	2.41169	-0.228324	1.48591	0.350878
-0.499236	-0.658461	0.668899	1.23764	-1.3038	0.104461	0.758537	-0.550359	-0.465659	10.6934	-1.81637	-3.57429	-0.957327	0.185037	0.337207	0.47847	-0.347061	-0.025613	2.53821	1.26284	0.480078	-2.47885	-0.116822
0.572243	2.71634	0.995033	-0.354255	-4.83965	-0.207816	0	0.879127	-0.878998	-3.35763	-1.76832	-3.06199	-2.47527	0.297863	0.499162	0.831853	1.32944	1.10365	1.36903	0.547518	0.988868	0.843125	1.45056
2.61951	-0.982716	-3.0153	-1.49233	0.275103	-2.49064	0	-1.87747	-0.886793	1.21214	0.128183	-0.855064	1.83193	0.26356	0.126662	-2.39532	-1.09793	-0.157037	-3.13899	-2.04893	-1.33669	-1.81548	-0.0576203
-2.40435	-0.262238	0	0.172131	0	-3.0661	0	0	0.769007	1.67268	-0.16317	-0.468345	-0.728748	1.34046	-0.217234	0.965026	1.20117	0.623421	0	0.0795862	0.0120142	0.48736	0.0576203
1.19189	0.567316	6.58132	0	-0.275103	0.583458	-0.252207	4.14907	0.646111	0.943403	-4.79041	-2.20212	-2.71845	0.374432	-0.399492	-1.20774	1.09948	0.181237	1.14142	0.871293	0	-0.640149	-0.0576203
1.08498	-1.41333	-1.92932	-0.0312744	0.549452	1.76917	0	-0.428725	-1.65293	-0.235018	0.122294	-1.22669	-0.964975	0.225627	-0.200346	-1.22251	-2.56954	0.782928	-0.759497	-0.871293	0	-3.2321	1.03212
-1.69597	-0.0551846	1.61034	-0.470294	-0.274349	-1.5865	3.47429	1.2807	0.711747	2.09554	0.621385	2.2504	0.336701	-0.0942913	-0.145959	0.490799	-1.21907	-0.081404	-5.75322	-1.20049	0.383694	-2.33275	-0.686895
1.06877	-2.43615	-1.28619	-0.598899	0.820798	-0.109819	0.243605	-1.71127	-0.236687	-0.230681	0.56925	0.898892	1.33558	-0.201178	-0.402489	0.488401	1.27889	-0.56196	1.33692	1.35948	0	1.50813	-0.749499
0.221626	-4.66601	0	-0.634319	0.272109	-0.364798	0	-0.540834	0.236687	-0.695252	-0.0483209	0.688915	-1.00001	-0.61011	-0.819111	1.9301	-1.2032	0.87432	0.397615	0.71231	0	-2.12432	0.519482
-0.352933	-0.522877	2.24009	-0.750503	0.811912	1.12594	4.28637	1.72047	-1.18907	1.3857	0.590328	1.17244	1.2898	-0.430964	-1.33031	0.595594	1.61721	0.704051	1.9647	1.02002	0	-0.456473	1.14483
-0.0733407	-2.33248	-0.634923	0.55942	0	1.07828	0	0.106553	0.238949	0.685717	-3.33425	-4.45634	-3.61992	0	-1.25337	-0.356931	-0.443906	-0.706462	0.38835	-0.862412	0	-0.589972	-2.2447
-0.0438396	-0.00609812	1.8928	-0.127592	2.13341	0.463045	-1.17235	3.14491	-1.80619	0.907036	2.80432	1.63616	0.981027	-0.608158	-1.22127	0	0.967341	-1.40036	-0.129283	-0.711184	0	-0.428266	0.0581903
-1.89348	-0.98052	-1.8928	0.414079	3.11714	0.10732	1.86921	-1.14168	1.1477	-2.05252	-1.87719	-0.489334	-0.467986	0.0877028	-1.71375	0.475625	0.147995	0.323092	1.413	-0.556661	0	-0.89538	-0.0581903
-2.32962	-0.0431181	2.82593	0.870328	-2.3287	-1.93689	5.84436	2.27048	-1.94063	1.14549	-0.0123054	-1.60489	-1.15807	-0.565151	-2.02226	-0.714289	0.516263	-0.146361	0.508907	-0.0797766	0	-1.47654	0
-1.16687	0.614215	0.924506	-0.157679	2.3287	0.252735	0	0.101989	0.54962	1.80592	0.122986	0.749263	0.987344	0.130058	-1.96233	0	1.061	0.0219677	0.50633	0.953145	-0.720637	4.97878	0.116347
0.316399	-0.497223	2.12451	1.12978	-1.28702	0.360849	-0.657177	3.40714	1.03	1.77388	1.08796	1.58446	0.808343	0.134076	-1.85656	-0.359067	0.305233	-0.488496	0.754721	0.3551	0.720637	0.800901	0.34823
0.310069	-0.958424	-0.300752	1.02454	-1.3038	0.10737	4.51204	-1.78931	-0.0602954	-0.440529	-1.45738	-1.76256	-0.467191	0.196599	-2.0712	-0.240096	-1.21922	-1.90485	-1.76996	-2.10953	0	0.667835	-5.17203
-1.43218	0.699628	2.08651	-1.49373	-3.20027	-0.144029	-4.07345	2.4766	-1.51932	-0.886924	-0.655984	-1.00938	0.847822	0.271257	-1.68412	-0.602775	-0.670674	-2.9125	0	-1.29556	-0.239636	0.0316907	-2.97236
-1.13519	-0.563033	-0.295421	-0.518665	-0.816331	-3.01618	1.7354	-1.37933	-0.675886	1.32745	-2.20976	-2.73355	-1.7888	0.124948	-1.78954	-0.120992	0.269547	0.303223	2.02027	1.13453	0	-0.190295	1.12501
0.687958	0.414848	-3.00323	-0.220855	2.96119	-0.365517	0	-2.00408	-1.11594	7.81813	-2.07806	-1.77592	-0.819854	-0.0333042	-1.45505	0.603502	-1.01923	0.0649789	-0.250313	-1.05307	-0.384616	-3.02956	-0.311236
-0.402864	-0.956113	2.70693	-2.51073	-2.41622	-1.12579	-4.84676	1.30721	-0.876649	-0.611623	2.00186	1.07842	-1.88066	-0.074975	-0.869862	-0.361664	0.0372453	-2.07176	-4.48506	-2.05684	0.480539	0.29407	-3.2312
0.229872	-0.946449	0.296297	0.016193	-1.9205	-1.00893	0.674918	0.398804	-0.251889	0.20429	-1.07294	0	1.48995	0.154054	-0.629216	-0.362977	0.34943	0.0261746	-1.05403	-0.834729	-2.96787	1.13545	-0.775699
0.187932	-0.460787	0	0.484575	-1.39472	-2.47668	3.09075	1.38342	1.06618	-1.85381	1.07294	1.31842	2.36418	0.0748596	-0.531165	-0.121286	0.783622	1.64049	1.05403	0.418236	1.0317	-0.485045	1.67314
0.606242	0.0126526	0.589972	1.12163	-0.563382	-2.07568	0	-1.08536	-0.187324	0.621764	-1.63959	-0.828759	-0.896102	0.476952	-0.272325	1.20629	-0.932166	-0.133965	1.17265	0.914007	0	-1.14101	-0.576002
0.648869	1.56288	0	-2.45174	0	3.26554	-2.19789	0	2.89518	1.63938	0.54096	0.0904159	-0.128673	-0.198799	-0.102313	0.119832	0.437573	-0.660421	-0.910872	-1.16474	-0.244678	1.17342	0.639797
-2.20072	-0.46818	2.32569	0	0	-1.73229	2.84795	2.2561	0.725956	3.39693	-0.890271	-0.548269	-1.55712	-0.145207	0.0113733	0.119689	-0.140704	0.763487	1.42767	0.750316	0	1.15981	-0.0637959
-1.28738	2.05605	2.27283	-1.28186	-3.15665	1.40289	0	0.580272	-1.94772	2.71334	-4.00609	0	-2.96416	-0.199485	0.0682128	0.952388	-0.334039	-0.197637	-0.646415	-0.24948	-0.441935	-1.35442	0.382166
-0.611878	0.939547	-0.846267	-3.74096	0.291121	1.84575	-3.51685	-2.34157	-0.554701	2.26853	2.37281	-1.6908	1.5594	-0.229067	0.193017	0	0.785073	0.869254	-1.43699	-1.93365	-0.468616	1.16205	1.07494
0.29265	-1.12975	-0.568183	-0.499183	1.72915	2.25247	0	0.492369	-0.495664	-1.69655	-0.356318	-1.10591	-1.73917	-0.267212	0.102035	0.35482	-0.0221345	1.05601	1.43699	2.01688	-0.222745	1.37054	1.25002
-0.436674	0.361686	-1.43474	-0.849152	0	2.07911	-0.898882	-1.18578	-0.373367	-0.380953	-1.45152	0.317224	0.761823	0.375564	-0.272325	0.235849	-1.05334	0.912128	0.38835	0.249273	-0.446984	-0.922252	0.371978
0.659684	2.6628	-2.33929	0	-1.72915	1.21921	-2.05252	-1.80547	0.930817	-0.95878	0	0	-0.941922	0.00416502	0.136255	0.117716	0.742945	-1.31964	0.772205	0.0829531	-0.24919	3.11395	-0.807709
-0.0997888	-3.41214	2.33929	0.191255	-2.05587	3.14902	-3.04117	1.40706	1.28876	2.8492	1.4383	-0.125836	-0.315956	-0.0541588	0.701043	-0.353565	-0.344783	0.876374	-1.29034	-0.165975	0.0498878	1.29233	0.869571
-0.0612438	0.147856	0.863315	-0.29573	-0.297177	1.16257	0	2.07415	0.060957	0	1.16991	1.27432	1.12386	0.0583236	0.225099	0.353565	0.787915	1.21449	3.06929	2.13648	0.745345	1.63739	1.65597
1.37861	0.656545	-1.44303	0	0.297177	2.44696	0	0.097704	-0.549956	-0.940741	-1.02457	-1.35829	-1.75878	0.465368	-0.101232	0.117578	-0.821345	-0.68849	0.125865	-0.652531	0.123686	0.150263	-0.548949
-1.36329	0.979833	1.72915	0.0696621	-6.43407	0.334157	0	1.55042	-0.122624	1.68701	-2.27009	-0.205579	0.453927	-0.224104	-0.0900698	-1.30102	-1.1433	0.158598	0.251256	-0.739223	0.419391	-0.753583	1.21582
1.7905	-0.242542	1.41846	0.866707	-2.24009	0.267461	9.07652	-0.0962001	0.67258	2.56895	-0.460269	-0.633403	-0.590508	0.0124634	-0.0450653	0.47506	-0.331226	-0.0433807	0.125392	0.657357	-0.246488	-1.06465	0.301659
-0.116982	0.00607072	0	1.23501	0	0	0	0	-1.53519	0	0	0	0	0	0	-0.713439	-0.241582	-0.61771	0.749067	-0.163934	-0.942234	0.0305764	0
-0.752014	-2.8072	0	0	-0.975617	0.200128	0	0	-1.55912	2.68113	-11.1258	-5.94868	-9.00394	-0.299551	0.123881	0	-3.11686	-0.765273	0.619965	-1.15513	0.0124556	-0.490347	-6.21318
1.51981	0.162196	0	0.0681663	-0.327333	-1.34063	-4.66233	-3.02905	-0.0628733	5.82356	4.50714	0.174681	2.75337	0.187324	-0.0675524	-0.718566	1.63963	1.14991	-0.619965	0.248653	0.0124541	0.153492	5.00104
-1.33825	-1.94486	-0.848661	-1.35496	0.327333	-0.303807	-1.83491	-2.10534	-1.90482	0.332226	-2.92733	-5.35161	-3.20303	1.44101	-0.383661	0.718566	-0.73142	0.323987	0	0.988476	-0.988682	0.18388	0
-0.0760997	0.0698879	0.566574	0.258688	0	1.47827	-0.464038	0.202429	-0.966191	-1.16765	0.461688	-0.316139	-1.87016	0.42951	0	-2.0495	-0.565696	1.08866	0	0.2456	-0.491711	1.60975	-0.122026
0.493445	-0.579638	2.51059	0.429665	2.26181	-1.00635	-1.40518	1.40565	0.580834	0	-0.850561	-1.3816	-0.819677	-0.327078	0.21458	0.607166	1.56524	-0.258446	-0.749067	1.29977	-0.456043	3.11459	1.21361
0.698876	-1.09192	1.0959	1.32881	1.26986	-0.20249	3.01997	2.46197	-0.580834	0.835427	-1.26679	-1.55301	-0.15444	0.257664	0.090212	-0.607166	-0.314164	-1.2069	0.997515	-0.647776	0.266278	-1.88685	-2.01042
0.25327	-1.0387	-1.0959	-1.32881	3.41118	0.20249	0	0.775198	0.837904	0.663352	-4.27906	-4.13293	-2.45123	-0.956277	-0.225683	-1.59611	-0.874883	-0.182592	-0.372903	0	2.51342	-0.716849	-0.246457
1.26017	0.747655	1.0959	-0.51582	0.607905	0.134766	0	0.481465	0.767267	-1.66671	0.961622	0.649225	1.83107	-0.322181	-0.248841	-0.247832	1.18905	3.25618	0.74442	1.05051	-0.123564	-0.842871	5.40348
-0.540585	-0.989398	0.272109	0.943646	-0.30349	-0.202217	0	-1.64653	0.317965	-0.336701	-4.41024	-4.13591	-1.6728	-0.335675	0.0566091	-0.124147	-0.922303	-0.285237	0.73892	-0.241449	-0.495787	-1.3084	0
-2.46774	-1.03894	1.34955	-0.376391	0.30349	0.839301	0	0.971825	-1.85843	1.83798	-1.61987	-1.87065	0	-0.470178	0.180934	-0.124301	0.646504	-0.460859	0.245098	-0.890334	0.347309	-0.276031	0.175183
0.281546	-1.02981	1.06668	1.76695	0.604231	-0.0669324	0	0.578594	-0.779225	1.47907	-3.73494	-1.94896	-1.86225	-1.2042	-0.0791184	0.248447	0.379028	-0.0220766	0.122324	0.0812678	-0.247955	2.39732	-0.0583601
0.427699	1.29385	1.31754	0.185076	0.300752	-1.41484	0	-0.675352	-0.195759	2.09854	-3.25246	-1.41751	-2.44644	0.24453	-0.441952	-1.12291	-1.45887	-0.656343	-0.859428	-1.5555	-0.248571	-1.35851	-1.47018
1.27494	-0.15174	-0.78844	0.318872	0.29985	-0.237367	-0.458716	-1.65938	-1.77929	0.159617	0.0178683	-2.30053	-0.940012	-0.934962	-0.855437	-1.89999	-0.591119	-1.55038	-0.991334	0.411693	-1.65625	-2.77368	-6.23293
0.0240469	-2.07472	0.526317	-1.53654	0	0.643992	-1.8562	0.392928	0.13289	4.36887	0.81851	1.57484	1.87127	-0.24683	-0.805065	-1.54642	0.148108	0.0234049	-2.01265	-1.2402	-0.227992	-2.37165	0.440391
1.33748	0.604841	0.784318	1.4695	0.298954	-2.22078	0	0.781254	1.6464	1.21398	-4.06891	-1.09537	-2.8763	-1.40313	-0.753408	0	-0.891955	-0.0911428	0.506972	0.249273	0.0760553	0.159872	-0.0627944
0.441437	0.641156	0	-0.0335402	0.298063	-1.81308	0.70012	-0.389864	-0.0653381	-3.68705	4.91592	3.13494	1.22701	-0.341955	-0.935132	2.56424	1.41249	0.213929	0.504415	-0.666114	-0.712109	-0.32	0.750942
0.139295	-1.48896	0.260078	0.451846	-1.49928	-1.23933	0.232288	0.778214	-0.65574	-1.10151	-2.96027	-3.57014	-2.29895	-2.1608	-1.4908	0.379028	-0.754486	-1.0287	1.86921	-0.167224	-2.06299	0.32	-2.90976
0	-0.827797	0.776201	1.59023	-0.302572	-0.859226	1.61108	0	-0.197563	1.56989	2.73158	3.05648	12.2122	-0.417352	-1.62234	-0.50569	-0.359797	-0.638801	0.123381	-1.00926	-1.46984	-1.28619	1.21214
0	0.0817272	-1.55847	-0.263288	-0.30349	2.55461	0	-0.973718	-0.462505	-3.80998	-1.9204	-3.49359	-11.4213	0.120056	-1.20667	0.50569	-0.313923	-0.293267	0	0	-2.13798	-0.747121	-0.253968
0	0	0	0	0	0	0	0	0	0	0	0	0	0	0	0	0	0	0	0	0	0	0
0	-1.29503	2.07261	0	0	-1.41061	0	1.74592	-0.331675	-0.161943	-2.01294	-0.279738	-0.564336	0.252979	-1.18418	0	0	1.59028	0	0	0	0	2.38705
0	-1.88665	-0.51414	0	0	-0.284776	0	-0.481929	-0.599802	0.807107	-2.0917	-3.15618	-5.04894	-5.06403	-0.972576	2.85911	0.157085	-1.04608	0.123229	2.58671	0.296696	-1.87598	-1.62707
0	1.01389	-1.55847	0.230415	-1.84054	-0.285589	3.36732	-0.678626	0.200334	-2.93659	1.26396	-0.375235	1.1246	1.42135	-1.36245	-0.122624	0.4229	2.02659	-0.123229	-0.661159	0.0269288	0.165975	2.86089
-1.31251	-0.768214	-2.65268	-0.0328839	0.617286	-0.107934	0	-1.76648	-0.60221	-1.66949	-1.28266	0.545928	1.46073	0.050555	-0.216161	-0.2457	-0.469999	-1.58391	0	0	-2.95103	0.496279	-3.49381
0	0	0	0	0	0	0	0	0	0	0	0	0	0	0	0	0	0	0	0	0	0	0
0.0299532	-1.46184	-0.539085	-2.86925	0.30722	2.89118	0	-1.79825	-2.37702	-1.35595	-1.37517	-2.17501	-0.873877	0.142336	-0.369828	0.368325	-0.740803	0.212195	-2.49701	-1.0838	-0.835427	-2.13484	1.13638
0.0444084	3.76955	2.92964	-1.20883	-1.23458	1.77024	0	3.7591	0.411523	1.35595	-5.19724	-3.93789	-0.645732	4.83203	-0.20463	0.610875	-1.71531	0.689045	0.378549	1.0838	0.307134	2.46433	0.0627549
-1.33409	3.10934	-0.262812	1.61417	1.23458	-2.93718	-4.51544	0.966191	3.82725	0.336135	-4.22382	-3.18814	-1.84255	1.45823	-0.256378	-0.7335	0.120632	0.887394	0.502514	0.578753	0.0278746	0.39396	4.0571
0.448939	0.463792	-2.39692	-0.863315	-0.30722	0.25886	0	0	-0.4622	-2.03397	1.46894	-2.7145	-0.481059	0.614224	-0.154143	0.489597	-0.620795	0.622366	-0.376648	0.411354	-0.53095	1.88256	-0.180886
1.96604	1.36557	-0.811912	0.2886	-0.927364	-1.0457	0	-0.675352	0.4622	-2.0762	0.225664	1.33727	0.720724	0.695559	-0.0900264	-0.366973	-0.109239	-0.171301	-0.504415	0.246003	0.0560224	0	-0.84849
-0.543502	1.12175	1.61729	0.270865	0	0.86334	-0.231214	0.386474	0.0658545	-0.701757	-0.926409	-2.51288	-1.08304	0.0255113	-0.141634	-2.73309	-0.149892	0.458886	0.504415	0.327065	2.29768	-1.62078	0.0608458
1.16214	-0.893788	1.59155	0.354401	0.310078	0.591474	0	-3.53324	-0.9924	-1.41846	-4.85213	-4.05538	-2.32569	-0.65258	-0.27095	0.877749	-1.06787	0.655879	1.37416	0.650938	0.0273635	-1.31581	0.303675
-0.180386	-0.547982	-4.30174	-1.61335	-1.56009	0.111508	-5.47104	-1.20604	0.662693	-0.357782	-0.304414	0.0934871	-1.93817	-0.446027	-0.89547	-1.76327	-2.68277	0.726083	1.35554	0.888177	-0.136893	-3.02544	4.15737
0.273595	1.64146	-1.38315	1.00503	-1.58482	0.185978	0	0.504288	0.329707	-2.9093	5.44568	5.77898	1.50379	-0.249613	-0.588352	-1.15017	-5.54712	0.163331	-2.7297	-0.160901	0.0273935	-2.34817	-1.28807
-0.562559	-1.06095	0.555557	-1.79569	-3.24704	1.68487	-1.72631	-1.62275	2.47087	-1.29993	-4.47049	-3.25694	-2.45527	-1.2575	-0.196889	-1.29368	1.09736	2.16819	-1.90482	1.28002	-0.576845	1.14644	0.821601
-0.910484	-3.02393	1.37554	0.876219	-0.330579	-0.345565	0	-0.102302	0	0	4.47049	4.82477	2.57957	-1.22049	-0.170951	-1.31063	1.51981	0.764724	-2.99307	0.317461	2.42222	2.08519	3.72856
0	0.301195	0	-0.566088	0	0	0	0	1.33973	0	0	0	0	0	0	0.394997	-1.02815	-0.0565043	1.05126	0.158353	-1.87276	-2.08519	0
-0.462075	-2.90898	1.35687	0	2.29143	-0.114649	-0.498754	-0.822204	1.32202	0.744882	-3.56881	-3.3924	-1.69124	-2.01676	-1.19159	-1.99078	0.227452	1.37292	1.68507	0.237061	2.16811	2.05135	1.23113
-2.13284	-1.04438	-0.269906	-2.15623	0.323102	0.107412	0	0.206186	0.747667	0.370371	2.24016	0.678828	0.0631512	-0.3567	0	0.801072	1.37119	-0.0116152	0	1.41068	0.267738	1.67789	0.941053
-1.57556	-0.73971	-1.36057	0.385965	0.322061	-0.11828	0.995033	-0.723517	0.247985	-0.556072	-4.09526	0.607769	0.629329	-0.385217	-0.708417	1.1897	-1.81784	0.835934	-1.55444	-0.46802	-0.805373	-1.17156	1.42234
-1.44497	0.823107	0.818558	-0.491488	0	0.539572	0.493828	-0.415801	-4.23712	-0.559181	-1.46949	1.02188	-0.69248	0.0998457	-0.591957	-2.66327	-2.62342	-0.751562	0.130463	-0.391697	-0.540542	-3.42499	-0.435493
-0.618994	-0.152948	-0.818558	-0.830467	0	-1.48235	0	1.03628	1.21992	-1.88685	-1.02155	-3.40731	0.126263	-1.29664	-0.731314	-1.35872	1.42252	-1.09931	0.649775	-1.42295	-0.54348	2.74931	-2.0392
0.40989	2.63661	-0.549452	2.2804	0	-2.31857	2.91283	-0.932166	-1.15534	-0.190658	2.29489	2.51097	-0.0631114	-1.03934	-0.901153	2.29895	-3.16771	1.1666	0.774197	0.47657	0	0.270819	0.831721
-0.957003	0.257174	-2.51059	0.259808	-0.645164	-3.83956	0	-0.417102	-0.129199	-2.7081	-3.91509	0.932904	-0.887767	-0.0510903	-0.550132	1.06384	1.21214	-0.405212	1.15017	-0.396983	0	1.74267	-0.0552334
-0.985816	-3.34006	-0.282886	1.04965	-0.324149	-0.741766	-1.20338	-0.209205	-2.15624	0.39139	0.090703	0.750268	-1.02434	-0.629153	-0.511581	0	-1.57958	-1.7733	-0.127146	-1.92777	-2.7346	-1.00168	-6.38758
0.0510796	0.237331	-0.85349	0.102652	-1.6367	3.79595	0	-0.735684	-0.596226	-0.981362	7.99032	5.88986	5.75159	-1.03857	-0.569961	-1.06384	1.96835	0.615285	-1.40938	-0.978003	2.76184	1.76289	1.40353
-0.597923	0.542346	0.285307	-0.256827	-2.33734	-0.573819	0	-0.211193	-3.72293	-1.79109	3.0093	5.21858	3.75603	-0.0708834	-0.839988	1.19603	-0.289174	-0.130461	-0.258398	0.163666	-0.0544959	1.04953	0.174064
1.20813	-0.43782	4.18471	0.887529	-2.39328	0.179436	0	2.71132	1.64162	4.13038	7.4137	2.25378	3.73285	0.626754	-1.10264	-1.73222	3.45107	-1.06814	2.42823	0.407997	-0.218281	-0.0979272	0.173762
1.05454	2.14973	-0.547947	2.23482	3.73558	-1.19385	0	-1.34647	-0.271739	-0.386101	-9.0514	-6.0458	-3.20761	-0.230453	-0.756228	0.669795	0.240138	0.515334	0	0.811034	0	-1.21572	1.20795
1.03155	-0.375619	0.274349	-0.382919	0.332779	0.109819	0	0.934101	-0.888287	2.67191	4.10449	2.23439	1.67392	-0.434127	-0.545743	-1.20888	0.187343	-0.260507	-0.50633	-0.24262	-0.520335	0.330033	-2.0798
0.803025	0.973691	0.273598	0.896718	2.29895	-0.950208	0	-0.725768	0.410959	0.37594	2.31066	1.77817	2.0958	-0.383787	-0.809721	0.9415	-1.28797	-2.21822	-0.25413	0.323363	0	0.394608	-2.84211
2.60204	0.452964	1.35687	-0.414148	-1.30721	2.24989	0	0.622409	1.49257	0.374532	2.54194	1.22361	1.39162	-0.949186	-1.43298	2.5117	0.308167	0.627883	-1.02303	-1.95605	0.57495	-0.52649	2.60833
-0.193385	-3.04766	-0.811912	1.18813	-1.32452	-3.02336	0	-0.726521	-0.675678	-0.938974	-5.68809	-0.314133	-1.61608	0.114954	-1.8581	-0.261438	-1.46563	-0.315469	-0.2574	0.0822707	-0.547497	-2.20156	-0.469209
0.645203	-0.35529	-0.272109	0.376587	-1.68071	-0.704939	0	0.933133	-0.271555	0.188501	-2.5492	-0.890041	-0.67644	0.448967	-1.31392	-0.78844	0.0980829	-1.11572	-0.646415	-1.32452	-0.633349	-0.507186	-0.707968
1.52724	2.5494	-0.820798	-0.820484	-0.339559	0.408454	0	0.617286	2.01891	-0.756147	4.74231	3.13133	4.91133	0.518099	-1.47016	-1.19444	2.49958	-0.0147101	0.129618	0.332779	0.275862	-0.305551	0.118343
-0.0357509	-0.156596	0	0.771444	-0.340716	1.43649	0	0	-0.601405	2.2515	2.87027	1.53274	2.8141	0.118453	-1.41384	1.8519	0.0304183	0.731244	1.79722	-0.24948	0.110132	-0.408859	2.62635
-0.94382	0.739965	0	0.814204	0	0	0	0	0.801072	0	0	0	0	0	0	-0.131148	0.173641	-0.0495035	0.127146	0.415456	-1.49712	-0.307745	0
0.402658	-3.93154	1.90482	0	2.0271	-0.255789	0	1.92997	0.794706	0.185357	1.69464	-2.74557	-0.104767	0.085199	-1.41824	-0.922881	-1.8252	-2.03613	-0.127146	-1.16765	0.27894	-2.49666	-6.11648
0.925731	-0.940036	-1.63047	1.95927	-0.335009	-2.75052	0	-0.808085	-0.396564	-1.30477	-2.70619	-0.382044	-0.157356	-0.17521	-2.55579	-0.132538	1.74709	-0.537437	-0.894575	-1.69209	1.41062	0.105282	0.305717
-0.126248	-2.13889	1.89965	1.23283	-1.01181	-0.946375	-1.95605	1.20969	-2.41299	0	-1.95648	3.46094	2.02657	-0.24201	-0.800985	0.264901	0.117129	0.676517	0.25641	-0.170794	-0.606062	-1.91224	0.487212
0.430718	-0.188803	-1.3532	-1.05804	0.675678	-0.610844	2.19789	-0.603017	-2.05628	-3.24147	-2.31533	1.72897	5.84436	0.0474992	-0.873656	-1.06384	-1.01533	-0.17388	0.255755	-0.342466	0.0276281	-0.214746	-0.487212
0.79271	-2.01167	-1.64839	-0.0317561	-1.01524	-3.62427	-1.21508	0	-1.04421	0	-0.783845	0.284272	3.1051	-0.490325	-0.215464	-1.07528	-0.412553	-0.398579	0	-0.257621	-1.11112	1.21084	0.122026
0.41795	-0.259904	-0.277393	-0.749187	-0.682597	-1.6393	0.2442	1.79825	-0.280309	-0.973718	-2.20327	-1.97012	-9.62043	-0.377711	0.215464	-1.49765	2.01147	-0.29998	0.636539	-0.258287	0	1.58037	-1.59807
-1.62738	-2.74382	-0.557105	0.812689	1.02216	-0.0807611	0.729043	-0.895083	-2.55877	-1.57794	3.58592	7.56643	-0.103627	-0.0718787	0.791561	0.547197	0.0517108	0.571685	1.88566	0.515908	0	0.243605	2.08469
0.541762	-1.61791	1.38698	0.837618	0.33841	-1.50525	0	1.48738	1.57146	1.18578	-5.31279	-0.687682	3.56453	-0.163117	1.91969	1.22035	1.9539	0.266003	1.23764	1.27824	0.612645	-0.0347645	0.966191
1.10955	0.658024	1.0959	-0.504892	2.00676	-0.698879	-1.21804	0.490919	-1.35571	1.55949	4.49352	4.55263	-3.87606	-0.26443	2.10467	0.671594	0.109783	0.677136	-0.616905	-0.339271	0.0277585	-2.00182	0
-0.267196	-1.45341	-0.820798	-0.491557	2.93659	4.58104	0	-1.87845	1.00072	-2.94428	-0.502867	-4.38026	-6.2772	-0.715048	1.73618	2.38106	0.0253175	-0.644038	1.59611	0.677395	-0.250104	-1.71739	-0.723767
0.633021	-3.48928	0.820798	-0.0795102	-0.969313	-7.72506	-4.00053	-0.29985	-1.57709	1.18813	1.6797	1.19263	2.89243	0.067859	1.69131	-0.787406	-1.42347	-0.461868	1.21067	0	0	-1.30768	-1.77104
-0.904229	2.403	-0.272851	-1.97613	1.92932	0.805705	-1.54245	-1.92022	-1.23593	-1.98814	2.15779	-1.86654	-4.28637	0.130741	1.63318	-0.131839	0.337513	-0.0939611	-0.603502	-0.592469	0.0278203	1.91931	-0.370371
-0.206202	-0.762695	0.272851	-0.032457	0.317965	0.930143	0	-0.819677	0.219218	-3.2656	-1.50555	-1.60208	-1.52761	0.00483898	1.57741	1.44076	-0.0768016	0.37283	0.241838	0.676822	0.0556174	1.84796	0.493524
-1.78976	2.52779	-0.546449	-0.667701	0.632914	-2.59183	0	0	0.437	0.414079	-2.29162	-0.683562	-0.916387	0.48272	0.530115	-0.914441	-1.57456	-2.6097	-0.605695	-1.70072	0.0277971	1.19007	-2.42927
-0.162866	-0.890422	0	-0.425742	-1.26986	3.85935	-3.15816	0.819677	-1.1696	1.63938	0.683008	-0.337608	-3.45366	1.23952	-0.249982	0.784318	2.2043	-0.658925	0	-1.20795	-0.0556019	0.935072	-0.315756
-0.689731	-1.07273	-0.274349	-1.07235	0	-1.3175	1.85436	-0.92261	-1.93028	0.607905	-3.11096	-3.13373	-1.01767	0.828898	-0.590669	-0.39139	-1.80617	-0.536655	-1.83941	-1.13489	-0.222717	-3.1871	-0.570886
-2.10721	-1.82463	0.820798	-2.38346	0	-0.445022	-1.05542	0.820517	0.746829	1.20483	-0.746272	0.543363	-0.120409	0.273211	-0.445303	0.910872	-0.589103	-0.864683	-1.37074	-1.4147	-0.223214	-1.9767	-2.12158
-0.0602792	-0.688847	-0.272851	-0.647582	-0.32	-3.15053	0.529102	-0.204499	0.445435	1.58419	-1.97527	-1.49678	-2.99625	0.633047	-0.626774	-0.389358	1.93613	-0.0138959	-1.00884	-0.44623	-1.09536	0.939313	0.841157
-0.619442	-2.02907	-2.21003	1.44278	-0.321028	-0.0991179	0	-1.54722	-4.15939	-0.987175	-4.87053	-3.49037	-4.44235	-0.145012	-0.645793	-0.521514	0.255341	0.1935	0.253165	-0.268697	-0.0564972	1.64055	0.0644122
-0.837563	5.1592	0.27894	-0.999246	-0.969313	1.39835	0	-0.625654	1.45652	2.35305	-2.13948	-1.45696	-0.324992	0.0842263	-0.589348	-0.524248	-0.302224	-0.0433531	-0.253165	-0.179533	-3.2159	-1.49682	0.641851
-0.21472	0.510987	-2.25362	-0.136263	0	-2.70672	-2.94533	-1.58148	-0.457667	-2.15483	-1.23685	0.0519379	-1.31063	-0.365494	-1.0666	0.785344	-1.0155	-0.391026	-3.08905	-1.26584	1.16044	-1.44668	-0.192123
-1.16538	0.36005	1.13316	-0.461263	-2.29895	0.137476	-2.47605	1.16219	-0.382995	1.57174	2.81773	4.79646	5.82938	-0.187952	-0.954294	1.16657	-1.90432	0.338977	-0.524248	-1.00595	-0.259928	-1.6159	-0.0641231
-1.26682	2.91817	-0.282088	3.79686	0.662254	-5.89079	0.278164	-0.421053	-0.69311	0.194742	-1.37622	-2.95081	-4.06405	-0.00470334	-0.885443	1.40757	3.17528	1.57029	1.17572	2.45133	0.0578202	1.94323	3.40512
2.45229	-0.144284	3.8786	0.788181	0	6.78669	0.554018	1.25788	0.308642	4.00435	4.39973	2.48573	0.194238	0.637632	-0.8304	0	3.25058	1.19214	1.0336	1.24779	-1.44097	3.39137	4.18878
-0.889291	-0.334932	1.61729	-0.147312	1.96085	7.63194	0	1.03628	0.614441	0.744882	2.99808	1.26611	0.258398	0.758902	-1.04382	1.38803	1.24357	0.126529	0	1.05728	0.0146595	0.385357	0.710903
0.675565	-2.17366	0.798939	2.01077	0.966191	2.19543	0	-0.206398	-2.0109	-3.01341	-0.783653	0.56914	-2.21796	0.291782	-0.974526	0.624612	0.397615	0.370231	-1.29368	-0.791909	2.76129	-2.478	-0.177253
0.0790545	1.30832	0.529102	-0.402156	0	1.10047	0	-0.103359	0.389864	-0.767758	3.59195	1.37574	2.15343	0.309376	-0.773574	-0.374299	-0.397615	0.561141	-0.39139	1.22916	-1.56646	-1.95446	0.941737
-0.622832	0.107618	-1.06102	-1.03695	0	-0.431574	0	-0.414508	-1.33179	-3.92978	5.31275	2.76625	7.40157	0.335996	-0.81222	-0.250313	0.745244	0.725636	1.42767	0.695655	0.0289645	0.146092	0.292483
-0.557816	-1.3692	0	-0.0977676	-1.29034	-0.391952	-0.554018	-0.625002	-1.75024	1.59049	-5.14878	-4.42921	-4.28725	-0.423632	-0.818871	0.500001	-1.90653	-0.452072	-3.67495	-1.39618	-0.551766	-3.07603	-0.409717
-1.80498	-2.94825	1.06102	0.552757	-1.96728	1.40744	-0.557105	-0.209205	-1.12996	4.4366	-0.348754	0.354329	0.187559	0.469571	-0.693072	-0.124766	0.459582	-1.24372	-1.75325	-1.68369	2.58709	-3.09599	-2.19398
0.490936	-0.426063	-5.98004	-1.78299	-0.664454	-2.99641	0.834497	0.730311	-0.815	-3.65074	-1.95067	-1.54251	-1.76438	0.531356	-0.714586	0.62228	-0.690168	0.152524	-0.819677	0.889686	0.255066	-3.83826	0.179695
1.11966	1.55079	0	0.903645	-1.68071	-0.641312	0.552488	0	2.74432	3.27267	4.90695	3.13364	1.88922	-0.109704	-0.434565	-1.12291	0.0576963	1.12784	1.63269	1.14488	0.0565931	2.47025	0.893661
0.779528	2.51433	3.57672	-0.83765	-1.02216	0.762067	0	1.44481	3.05786	1.50379	-1.99503	-3.41893	-3.42673	0.565514	-0.0335065	0.874459	-1.07281	-0.318557	1.3405	1.04531	0.57824	2.4875	-1.07336
0	0	0	1.76562	0	0	0	0	0	0	0	0	0	0	0	0	0	0	0	0	0	0	0
0.685069	2.43001	-0.542007	0	2.36898	-2.87845	0	-0.82305	-1.24322	-1.69336	5.83112	8.60016	4.91283	1.03604	-0.167701	0	0	2.20642	0	0	0	0	2.77878
-0.156265	-0.529863	-0.54496	2.55973	0	-0.74366	-0.552488	-0.82988	1.24322	0	3.52767	1.16152	1.64588	-0.428498	0.100654	-1.00001	1.34436	-0.892068	3.14574	1.12022	-0.267549	-3.71499	-1.64613
0.398468	-3.37288	-1.09891	1.66044	1.32892	0.496387	-0.834497	0.104112	1.07528	0	-6.72732	-6.71557	-4.07212	-0.126645	0.267917	0.501254	-0.937075	-0.738029	-1.42952	0.171233	0.0140994	0.199005	-2.33894
-0.559927	0.766347	-0.276625	0.449509	-0.995033	-2.4639	0	-1.89081	-1.15253	-1.72253	0.691497	0.582672	1.87155	0.022627	0.350555	-0.626961	-0.211746	-0.722603	-0.393443	-0.600602	0.0281928	-0.398407	-1.52861
-0.495542	-0.429369	-0.277393	-0.776281	-0.33389	-3.22103	-3.12082	-0.212314	0.231571	1.5326	1.64034	3.02052	3.10338	-0.599076	0.316114	-1.52094	0.679317	0.977225	2.0807	0.771543	0.295546	0.795233	1.40718
0.756503	-0.651468	-1.39862	-1.76105	-0.671143	-2.20647	0	-0.319319	0.691513	-4.67011	0.617882	-0.343453	0.358852	-0.0500854	0.24886	0	-0.908174	-0.689059	0.25707	-1.46239	-0.281452	-1.75794	-0.731711
1.54641	-0.220733	0.84152	0.0792833	-1.01524	1.37392	1.71433	1.2712	1.44434	-1.00101	2.56546	0.104907	1.12794	-0.132164	0.644151	0.890025	-0.773658	-0.131034	-2.46926	-0.608433	0.281452	1.52003	-0.245098
-1.21546	0.621535	0.557105	-0.715823	0	1.52895	0	0.524936	-1.13853	-1.41846	5.38697	5.14302	4.21906	0.227759	1.01557	0.756624	0.0965109	-0.173027	0.39396	0.087146	0.574513	0.672604	-0.430373
1.74846	1.76473	0	-0.127796	-1.02565	0.215874	0	0.104657	2.93364	0.813013	0.779179	0.974597	1.68354	-0.62988	1.29535	0.250941	1.77503	0.221454	1.68945	1.64151	0.876405	1.29287	0.369004
-0.910834	0.030819	1.10498	-0.883043	-1.03628	-0.30266	-0.283688	0.313316	-1.11816	0	-1.74382	-0.153542	-0.950524	0.488731	1.31055	0.125235	0.0247188	0.526177	0.128783	-0.515465	-0.54163	-2.28356	-0.12285
-1.6405	-0.0616475	0.274349	-0.956015	1.72121	-1.53029	2.24729	0.623703	-3.82017	0.806456	1.17774	-0.252761	-0.67644	-0.828134	1.18382	-3.827	-1.38122	-0.891631	-0.51613	-0.951976	-0.965515	1.93262	-2.11188
-0.0691192	1.04287	-1.37933	0.113904	0	-0.441782	0	0	-2.20481	0.400802	-1.41137	-1.69787	-1.36676	-0.082732	0.843755	-0.521514	-0.716759	0.459736	0.387347	0.173762	1.50715	-0.981362	0.0627549
0.236225	0.828052	0	-0.701757	-1.02917	1.53701	-1.11733	-0.415369	1.73643	-0.400802	1.05594	1.64284	1.14026	-0.437779	0.759517	0.261097	-0.692278	-0.937589	-1.29704	-1.22272	0.552488	0	-0.882173
0.636828	-1.19488	-0.557105	-0.0819202	-0.345423	2.66586	0.839166	0.725768	3.23354	-0.201005	0.744948	4.81976	2.24225	-0.444342	0.523642	1.68071	0.692278	0.415836	-0.654881	-0.794005	-0.524791	0.236407	0.252845
2.69827	0.0994835	-1.69018	4.06318	-2.8072	-3.19044	0	-0.82988	1.12996	-2.23814	-1.08378	0.162487	0.276778	-1.21344	0.122812	1.4004	1.46988	-1.22387	1.69385	-0.0886132	-0.24955	3.78424	-0.824093
1.27013	-3.6532	-1.14287	1.43752	-3.25526	4.11861	-0.558661	0.312013	1.19138	-3.34759	-0.753097	-0.178225	-0.554325	0.645888	0.321667	-0.253165	0.644577	1.9772	0.258065	-0.266312	0	2.65486	4.42027
0.172815	1.39444	0	-0.124185	-1.48151	0.670729	0	0.517868	-1.19138	0.21254	2.64646	0.0681824	0.83034	0.256261	0.670632	0.50569	1.01624	0.866545	-0.646415	1.67479	0.221853	-0.777926	1.21067
0.832205	0.04693	1.99153	0.170715	-0.749067	-0.880518	0	1.23205	-0.67644	1.26584	2.5953	0.0838531	-0.276015	0.413291	0.99759	-0.252525	0.496158	-0.0849965	0.646415	1.21635	0.276625	-0.186116	0.300391
-0.0970357	1.11203	-1.41846	0.664557	-1.13423	-2.90654	0	-1.02565	-0.0754432	-1.90482	1.811	2.19174	1.80777	0.729526	1.13655	-0.506972	3.22531	-2.55951	0.385853	-1.91811	-0.276625	3.87334	-3.97728
-1.95256	-1.86557	-0.860837	1.08772	1.13423	3.61686	0	-1.03628	2.38639	0.63898	-0.876016	-0.225757	0.595401	0.289409	1.34409	-0.254453	0.735758	-0.645772	-0.90265	-0.795409	0	-1.44407	0
0.307102	-0.52929	0.28777	-1.95406	-3.05367	0.762162	3.84663	1.24225	-2.76446	-0.425533	-0.305033	-0.422094	-0.324325	-1.0282	1.9325	0	0	1.36816	0	0	0	0	3.73704
1.49738	-0.571929	0.573067	-0.03108	-1.56253	0.222722	-4.12713	0.615387	1.50379	-1.28757	2.44773	1.51025	2.14256	0.120426	2.38885	1.13997	1.08973	0.574341	2.80989	2.54065	1.37554	3.92207	-0.18056
-0.490014	-2.61495	1.41846	0.077682	-0.790518	-0.44156	0.839166	-0.102302	0.891536	2.76908	0.906774	-1.97041	-1.11912	0	2.59359	-0.505052	-1.43736	-0.553321	-0.252207	-1.04349	0.272851	-2.33474	-0.483093
0.379316	0.440601	-1.41846	-1.21877	4.27249	-2.99614	0	-0.822204	0.736923	-1.48151	-3.23577	-2.15287	-2.33136	-0.28741	2.0731	-0.762393	0.214974	-0.51076	-0.379507	-1.23133	0	1.20955	-1.15679
0.586312	1.73524	0.569802	-0.47274	-3.08905	2.46456	-0.27894	0.103146	3.03711	1.9008	0.709462	-0.105955	-0.164699	-0.278927	1.87319	1.14142	-0.179765	0.148609	1.13423	0.881063	-3.04311	1.12519	0.792929
1.7153	-0.104071	-0.569802	1.03709	2.7081	-0.83453	0	-0.206398	0.142349	0	-0.303439	-0.329175	-0.550966	2.05043	1.51518	0.878851	-0.360502	-0.049793	-1.89759	-0.704228	1.94721	-0.139958	-1.34559
1.35752	0.431586	0	-1.19517	1.51518	-0.332207	0	-1.7718	0.567377	0	2.4845	2.14655	2.61738	0	1.08304	-2.02027	1.21734	0.571548	0.38241	0.176523	-0.275862	0.488999	2.01165
0.640245	-0.36753	0.569802	-0.539341	2.59755	-1.47707	0	0.210084	-4.04095	0.208986	-0.362977	1.1489	0.322408	-0.0410556	1.41341	1.51902	-0.567808	1.90799	0	0.790518	-5.39138	-2.11275	3.32375
0.760689	0.987662	1.12996	1.18588	-2.59755	-0.465433	0	0	-0.813313	6.4669	-1.01338	1.42035	0.641713	0.232426	1.36877	1.24846	-0.0585195	0.546124	-0.894575	0.784318	3.38238	-1.94041	1.79351
1.2156	1.08782	-0.281294	1.12536	4.41248	-2.73779	0	-0.52604	0.0742115	-0.588814	-0.267514	-0.0659714	0.159787	0.327214	1.06688	-0.997515	0.132595	0.0810482	0.767267	0.519482	-2.2806	1.44095	0.685717
0.172906	2.35542	0.561799	0.573423	0.359067	-2.22419	0	0.210748	-0.520641	2.14224	-0.486701	-0.539551	-0.8015	-0.386408	0.774388	-0.502514	-0.715755	0.494687	1.5171	1.37223	0.575045	-1.65889	0.907036
0.0147886	-1.11656	-2.26639	-2.59877	1.77625	3.95268	0	-0.951885	0.594797	-2.53672	-3.66668	-2.2191	-3.10567	0.127452	0.476395	0.251572	-2.52816	-1.6089	-1.64457	-1.63164	-0.287109	-4.91902	-3.62004
-0.641695	-2.85913	-0.574714	-0.876151	-2.13531	1.72319	0	-0.532766	-1.94617	0.787406	2.85586	1.45572	0.165883	0.00909753	0.619573	-0.377596	0.0643915	0.223177	-0.383387	-0.17331	0	0.190803	0.292142
1.51599	-3.36268	1.43064	-0.336566	-2.55023	1.8004	0	-0.213904	-0.758729	1.74932	2.04808	2.6943	2.45579	-0.031845	0.579642	0.628538	0.561664	-0.394618	-0.642263	-0.608962	-0.547789	-0.880726	0
-0.655239	-1.26049	-1.43064	-0.725049	1.10093	-0.084228	0	-1.61903	-1.38039	-1.1628	-2.18386	-0.829463	-1.30224	0.236321	0.180451	-0.250941	-1.49942	-0.0149218	-0.906155	-0.262123	-0.550806	-2.25603	0.116618
0	-1.51352	0	-0.730345	0	0	0	0	0	0	0	0	0	0	0	0	0	-0.0298503	0	0	0	0	0
-0.0508712	-0.885037	-1.4514	0	0.364299	-2.12909	0	-0.108873	-1.79202	-4.58705	-2.73754	-3.25795	-2.88109	0.773217	-0.0962001	0.376176	-0.856484	-1.37779	1.29201	-1.40971	0.579712	-0.275754	-2.29895
-0.315224	0.307246	-1.17648	0.016288	-2.20597	-1.03677	0	0.543184	-1.50498	-0.408999	0.383276	-2.52978	-2.38919	0.0450329	-0.252966	0.125078	-0.393992	-0.255931	0.894575	-0.444643	-0.579712	1.17648	-0.418286
-0.256182	0.467589	0.883658	-0.424352	-0.746272	3.37556	-1.97468	-0.108401	0.715709	0.408999	0.3125	2.66528	0.516797	0.15296	-0.483618	1.24225	0.19719	0.252568	-0.254777	-0.62584	-0.203696	-0.117028	-0.119832
-0.804667	0.878236	-0.588237	2.05592	1.11733	-2.12308	-0.285307	0.863936	0	-2.47947	4.34187	4.63543	4.26073	0.0943587	-0.37642	0	-1.42603	0.0563198	-0.127632	0	-0.554989	-1.49433	0.299312
-1.05034	3.01447	1.46415	0.032041	-2.24729	1.82908	0	-0.972455	2.03929	3.69652	-0.0165989	-1.1854	-1.10376	0.0224532	-0.0243339	-0.743498	0.153913	0.483714	-1.28536	-0.53957	0	2.8512	0.951822
1.78706	1.46579	0.868312	-0.917216	4.0822	-5.32357	0	1.93554	0.619197	3.7591	1.74433	1.38905	1.26828	0.157032	-0.146128	-0.124456	0.240794	-0.305717	0	-0.361337	-1.75819	0.499329	-0.593826
0.476827	0.768803	-0.2886	-0.291404	2.86758	0.311604	0	-0.748266	-1.7121	-0.389106	-2.69505	-1.47966	-3.3996	0.246267	0.109616	-0.124611	-0.473836	-0.108272	-1.17113	0.361337	4.38878	-0.383878	-1.13808
-0.565378	0.826254	1.43474	2.67152	-0.353983	2.92488	-0.573067	1.27934	0.391697	2.50254	-2.83864	-3.16171	-2.7588	0.379405	0.291723	-0.374766	-1.58317	-1.3868	-0.656601	-0.814853	0.0427869	-0.385357	-2.50089
-0.121253	-0.32492	-1.14614	-0.142169	0.706717	2.5064	0	-0.957964	-0.391697	-1.14724	1.89571	2.04251	1.15876	0.00890988	0.0970521	0.748133	0.350707	-0.415542	-1.05961	-0.72993	-1.33498	1.72253	-0.868492
0.0858101	0.767014	1.14614	-1.7059	1.74524	4.6731	0	0.426895	0.937507	0	-1.63742	-0.577136	-0.230681	0.64386	-0.0242542	-0.873368	0.198049	0.129882	-0.668005	0.547947	1.44899	1.99142	-0.687718
-0.0389379	0.690795	0	1.23054	2.05487	-0.641828	0	1.05933	-0.859045	2.09332	3.38156	3.3396	3.12614	-0.390262	-0.0970756	0.500001	0.294241	0.512752	0	0.996837	0.921535	0.408391	0.375705
0.675932	-0.266333	-1.72418	-0.270378	-2.74931	0.161197	0.858374	0.105319	-0.629428	-3.44862	1.99167	3.57163	1.6098	-0.00888731	-0.0850185	1.60795	1.12689	0.936918	0.401338	0.718781	-0.268494	0.775055	0
-0.663901	-2.64669	-0.290276	0.492494	-0.34904	0.441253	1.13316	-0.845671	-2.39628	-2.36697	-1.01557	-0.979929	-1.3304	0.315017	-0.170254	-0.492006	-2.6878	-0.823989	-0.401338	-0.808993	-0.524936	-2.23058	-0.375705
1.38964	0.842127	-1.1696	-2.24368	1.38891	-1.53369	0	-0.106213	0.483872	0	-1.29248	-0.0676035	-2.20037	0.291945	-0.304748	-1.99259	0.484839	0.333794	-0.942768	-1.18022	1.14562	-1.32452	-0.251256
0.938805	-2.12284	-1.18345	0.855327	-1.38891	-0.735461	0	-0.319319	-1.9497	-3.24572	-0.719729	-1.33728	-1.08977	-0.238801	-0.293435	0.125707	-1.85849	-0.0549908	-0.678889	-1.6575	-2.54945	-1.3423	1.86921
1.00727	0.949952	1.76996	-1.34274	-1.40847	-0.74091	-1.70459	1.9008	-1.07218	0.205973	0.803083	2.64737	1.43146	0.366811	-0.331146	0.250941	-1.02529	-0.296625	0.678889	0.64785	0.589718	-1.75272	-1.42993
-0.25386	-1.38326	1.4514	1.98346	0.353983	0.165122	2.82505	1.24742	0.661159	0.615387	-0.200167	-1.69728	1.18679	-0.097096	-0.467924	-0.125392	0.0174657	-0.125695	-1.08845	-1.01994	0.942057	0.196271	0.375
1.9917	1.44789	-0.2886	-0.0159681	0.704228	-1.78877	0.555557	0.82305	-0.661159	-1.85764	0.864511	-1.01375	0.560226	-0.327289	-0.556967	-0.503146	0.178848	2.32176	-0.962207	1.38827	0.0568101	-0.235571	0.931395
-0.735463	-0.884136	-1.45563	0.700194	-1.41345	2.20039	0.827591	-0.513612	-1.00001	0.415801	-1.31636	-1.90896	-2.94806	-0.0398786	-0.572568	-0.126183	-1.65671	-0.343513	-0.832182	-0.276116	0.241084	-0.0786473	-0.619965
0.618332	1.94447	2.032	-1.27675	-2.52266	0.981019	-0.827591	1.73562	2.88918	2.25651	0.652013	-0.917921	0.34463	1.05364	-0.387719	0.629329	-0.0930954	-1.27452	-2.68188	-1.57922	0.579057	-2.38865	0.37244
-1.01321	-2.01782	1.99153	1.29261	2.16615	0.323457	1.9205	-0.40568	-1.47544	3.97667	1.7182	1.37623	2.65928	-0.162391	-0.464737	0.99876	2.21505	-0.57718	-0.862074	-0.657588	0.0422386	3.56191	-2.25573
0.858229	3.66617	-0.282088	-0.700082	1.41846	-0.202216	-0.818558	-0.611623	1.96245	-0.782783	-1.7182	-1.86621	-2.03053	0.0965887	-0.378406	-0.99876	-0.700871	-0.358816	1.00503	0.563911	0.281136	-0.702305	0.442618
-0.266498	-0.464806	2.51059	-0.962626	1.0508	-0.0413479	-1.37933	1.21953	-0.894679	2.71334	-0.702344	-1.23301	-1.03094	1.48964	-0.253069	-1.5171	0.548925	-0.0255574	-3.04592	0.746969	-0.224846	-0.549668	-0.0631114
1.41289	-0.0631912	1.91002	0.530591	1.38411	-0.324247	3.27898	0.704583	0.651468	4.30375	-0.302521	0.485847	-0.0575871	-0.485396	-0.393526	0.254453	-0.16088	-0.227749	-0.442805	-0.0930665	0.0140677	-1.98814	-0.379507
0.319874	-1.12035	-0.814116	4.36148	-0.344234	-1.4367	0	-0.100351	0.888895	1.45457	-1.81746	-1.54755	-1.04228	-0.487763	-0.625201	0.506972	0.676557	0.674911	-0.444775	0.649654	0.0140657	-5.06594	-0.444586
-1.41649	-0.392299	7.85744	0	-4.94801	-1.96259	0	4.89814	3.24524	5.95623	1.93522	2.11225	2.2447	-0.266661	-0.629135	-0.126502	-0.506988	-0.816769	0.592594	-0.277907	-0.833279	1.21773	0
0.0126664	-2.70759	0	0.77988	2.5046	-1.57843	0.536194	0	3.36938	-5.41617	-4.3642	-1.05055	-2.41947	-0.0788229	-0.41301	0.630917	0.190964	0.0897532	3.19795	0.370371	0.0141814	0.374922	-0.574531
0.443817	-0.00824232	1.50003	-2.43614	-2.86758	1.35022	1.06384	-1.25062	-0.452831	0.537154	-0.0175639	0.949035	-0.584797	-1.52291	-0.220108	0.376648	0.212236	-0.599882	0.285714	0.0923788	0.0425321	1.44481	-0.25641
0	0.148258	0	0.420529	0	0	0	0	0.452831	0	0	0	0	0	0	0.375235	-0.590177	0.32524	-2.3089	-0.0923788	0.0141733	-1.65293	0
-0.314531	-2.1211	-0.497513	0	-0.364299	3.39831	-1.86921	-1.07057	0.375799	0.888895	-8.13903	-4.36995	-6.92024	-1.34789	-0.142681	-0.626176	-2.96842	-0.0119953	-2.21411	-3.28822	0.0141713	-2.53178	0.639797
-0.86721	-0.362151	-1.25472	-0.326925	6.36257	1.58626	0	-3.18118	-1.13166	-1.42605	-0.286232	1.31754	0.188383	-0.719411	0.116754	-0.377596	-4.53081	-1.24156	-1.35239	-0.0955566	0.0141693	-9.40289	-4.567
-0.180617	0.168606	0.754721	-1.42916	-0.343054	-0.654217	1.0724	0.302572	-0.303952	-2.3616	-1.38544	2.40539	-0.503146	0.0771658	0	0.251889	3.35825	0.702855	-2.91655	-2.91	-1.41259	2.86924	0.996355
0.914018	0.269179	0.997515	-1.53015	-2.08341	-2.29644	0	3.07411	-2.69974	0.549956	2.20379	3.02062	1.93575	0	1.21136	-0.630917	1.89626	0.284747	1.8519	1.56253	0.758718	4.80948	1.7688
0.935321	0.619716	1.47786	0.400738	0	-0.795421	2.89113	0.487093	3.53339	-0.182983	-0.0379147	-1.12708	0.185357	0.475297	0.752891	-1.01782	-0.68784	-0.248571	0.152788	0	0.0142602	-2.10904	0.840613
0	1.87741	1.45634	-0.0960307	1.04713	-0.614383	0	0.677969	1.05106	-0.183318	-1.04833	-5.74918	-1.80634	1.37686	0	-0.899171	-0.0807066	-0.584724	0.91186	-0.875918	-1.71141	4.25966	-0.516463
1.81987	1.66569	-3.18264	0	-0.696867	2.64362	1.28702	-0.386848	0.669895	-0.736652	1.6344	-0.532624	0.251099	-0.0712917	1.3762	0.128949	-0.530696	0.0969705	0.452831	0.681932	0	-1.11255	-0.714521
-0.316176	-1.19975	0.496279	0.73389	0	0.873493	0	-0.875918	-1.04401	-1.48979	-3.15967	-3.49979	-4.1606	-0.102571	0.637462	0.385853	-0.642391	-0.763585	-1.82376	-1.0737	-0.261438	-1.2557	-2.10811
-0.0768442	-0.539702	0	-1.34424	0	-2.07243	0	-1.17995	-1.05502	-1.13209	-0.977525	1.90638	-0.327333	-0.536866	0.410321	-0.643917	0.547649	-0.20164	-3.11552	-1.38342	-0.262123	1.34172	-0.0666001
-0.0512623	-0.740683	-2.5064	0.882194	0	0.187286	0.255428	-0.19802	-2.14403	-1.14505	-0.0393005	1.79613	0.457966	0.0493329	-0.0496463	-0.518136	-1.43658	-1.06555	-1.75583	-0.698954	0	-1.12409	-1.07168
0.123103	-0.281248	-3.88147	0	-2.12022	-0.859462	-1.28371	-0.0991572	-3.54507	-4.31439	-1.52493	0.170403	-0.852185	-1.8874	-0.422991	0.259404	-0.0183175	-1.95123	-1.95128	-1.71808	0.291206	1.72418	0.13459
-0.345839	-0.999009	0.526317	-0.0159706	-3.26708	2.10775	-1.56253	1.08536	-0.160514	-3.05212	0.953334	-0.694076	1.76187	0	-0.387234	-1.04168	-0.486641	-0.251568	1.14287	0.101885	-0.568639	-0.213904	-0.336814
-1.63082	0.43413	-1.05542	-0.640925	-0.369686	1.93927	1.8206	0.684599	-0.644644	-1.66671	-2.64386	-3.47795	-0.714057	0	-0.300828	-0.130976	-1.69405	-1.3653	-0.16247	-1.85	0.014621	-1.77149	0.0674536
-1.06414	-2.22381	0	0.401059	-1.49257	-0.601728	-1.8206	-1.07791	0.403389	1.04494	-2.38253	-0.1999	-0.784831	-0.941086	-0.503399	-1.05403	-1.65184	0	2.56836	2.35787	-0.836825	-0.349345	-0.812462
-1.69179	0.391057	-1.87422	0.431345	0.375235	-0.565562	-1.58733	-1.78931	-2.03342	-2.10092	-0.27058	-1.73245	-1.45505	-0.332641	-0.41722	-0.797877	-0.133333	-0.802199	-2.40589	-0.81384	1.1288	-1.14388	-1.30005
0.409889	-1.56487	-5.27168	-0.0956938	-3.04206	-0.0810563	0	-3.05523	-0.411693	-1.92932	-1.70262	-1.40675	-3.18132	-0.180643	-0.266413	-0.26738	-1.41084	1.26059	1.12996	-0.306906	-0.291971	-2.41839	1.02776
0.434841	-0.00861883	0.568183	-2.4553	-1.16506	0.323832	-3.52818	1.4374	-0.745345	1.71678	1.68177	-0.109036	0.753686	-0.404154	-0.241654	1.46182	2.17036	-0.219801	-0.967749	0	0.583092	2.63938	-0.0681896
0.409191	1.03752	-2.58264	0.0817327	1.9343	0.041114	1.64387	1.11506	1.97537	-3.02399	1.65396	2.06287	-0.273411	0.0279252	-0.216712	-0.132013	0.565879	-0.0173493	1.12813	0.714653	0	-0.664454	1.28772
0.153168	1.7252	2.86553	-0.803876	-0.769235	0.201073	1.61729	0.502766	-1.14755	0	-0.493321	-0.648932	-0.0684697	0.41331	-0.0382922	0.52701	-1.20159	-0.0593756	-0.481929	0.101678	-1.40518	-2.02027	-0.472495
-0.310844	0.293022	0	-0.396105	2.29018	0.522032	-1.07528	0	-0.994209	0.65574	-2.96969	-3.56718	-0.963531	0.0787529	0.229533	0	-0.601463	-0.00913784	-1.78721	-0.509425	0.0147395	0.135962	0.27027
-1.21605	-0.814207	-1.4225	0.527793	2.2389	3.54455	0	-1.82191	-1.93365	0	-4.02826	2.66868	-3.59067	0.498869	0.305227	0.915638	-0.182106	-0.193003	1.94811	-0.820517	-1.76943	-2.70845	-1.29034
-0.165739	0.630122	0.57143	0	-2.61697	2.55847	-2.7399	0.611	0.761103	-0.218103	1.09891	0.773874	1.49416	0.161138	-0.0889284	-0.260756	0.339982	0.036617	-3.93493	-1.66151	0.314536	0.787953	0
-1.55127	0.792496	1.13316	1.40479	0.754721	-0.0370763	0.82988	1.11056	-2.04262	0.869571	-1.36446	-5.24216	-0.993621	0.147099	0	-0.130634	-1.16842	-0.639056	-0.167364	-0.419728	0.31355	0.276625	-0.617074
-1.99103	-0.566621	-0.848661	-0.308667	-0.376648	-0.226729	-0.82988	-1.21214	-1.21109	1.07644	-0.979745	-1.17769	0.781532	-0.289809	0.35524	0.651468	0.154649	0.415484	0.334448	-0.315956	0.0447127	-0.0921235	0.821922
1.6838	2.09211	0.848661	0	0.376648	0.715559	0.82988	1.81274	0.347524	0.640344	-1.8519	-1.43668	-1.1388	0.027637	0.15186	-0.260078	-0.251426	0.612713	0.499585	-0.211193	0.312431	-0.461895	1.69094
-0.36196	2.61685	4.67761	-3.27464	0	-4.5307	1.0959	3.14368	-0.52174	3.14162	2.40976	4.4609	2.75344	-0.216695	0.0252876	0.389864	2.52875	0.590857	-0.332779	2.60839	0.311457	3.18934	2.7127
-0.395037	2.07494	-2.72496	0.536554	-0.754721	3.54931	0	-1.65777	0.26121	-3.78196	-4.15733	0.421324	-1.2614	0.00923063	-0.253165	0.129618	-3.58975	0.571167	2.14353	1.22827	-0.0444346	-3.60687	-0.392414
-1.57787	-2.73881	-7.45331	-0.738506	-2.6873	0.529639	-2.48289	-7.13133	-0.873368	-3.93064	0.254836	3.39288	1.60899	0.0692026	-0.139514	-0.519482	1.27861	1.26976	0.325733	0.709582	0.899645	-1.45168	1.94685
0.584034	2.66851	3.50913	5.09058	0	-0.947093	0	1.8829	-0.263505	2.42036	-2.22257	-2.43399	-1.18675	-0.0645876	-0.15242	-1.44265	0.0338091	-0.689295	0.6483	-0.202225	-0.840403	-1.37737	-0.644748
-0.0892344	0.140548	0	1.82443	0.38835	0.834497	0	-0.937019	1.22379	0	0.42493	0	-1.34325	0.00922935	-0.280041	1.05126	-0.382225	-0.112057	0.644125	0.906807	0.310444	1.37737	-1.43325
-0.0623187	-0.964373	-0.57637	0	0	-0.454317	0	-0.104657	-0.435351	-4.44518	-1.23254	-3.50789	0.779869	-0.0969507	0.101924	-1.18345	-0.974239	0.341158	-1.61816	-0.704583	-0.266036	0.235571	0.523561
0.713693	-0.0551637	1.14944	1.24982	-1.95701	-1.02915	-3.12082	-1.79614	1.12799	0	1.53831	-1.5332	-0.282886	0.018474	0.216244	0.659198	-1.44462	-0.241645	-2.47742	-0.101061	0.0147984	-2.52575	-3.2507
0.90517	-2.46591	0	0.0620829	0.787406	-0.0767062	-1.15943	-1.28757	-1.21529	-0.913248	-4.39288	-5.25747	-2.4374	0.083091	0.126984	-1.32277	-0.767739	1.12272	0.666669	0.403633	-1.46075	0.57748	2.59582
0.592327	-1.35846	1.13638	-0.857037	-0.787406	-1.31309	0.870833	1.39412	0.261666	0	0.611623	-1.4595	-1.68317	-0.346669	0.164839	0.79576	2.5593	1.78794	2.46116	2.38817	-0.120192	-0.144058	1.95192
-1.53005	-3.75513	-1.70944	0.452807	-0.39604	-0.46622	2.5679	-2.3708	-1.84621	2.26767	-1.35054	1.1963	-1.93747	-0.333937	0.202506	-1.19603	-1.20232	0.788907	-1.14101	1.0758	-0.255889	-1.98987	-1.36233
0.523627	-2.227	1.14287	-0.0311624	-3.22609	-5.992	0	-1.98244	-0.712381	-0.674918	-5.67077	-4.65782	-4.85645	-0.437658	0	-1.75325	-1.87881	0.176003	-5.56167	-4.17141	1.24318	-6.95182	-2.51336
0.154812	-0.698022	-0.855925	-4.78789	0.816331	-2.05214	0	0.222222	1.77153	-0.679504	2.40415	-1.94485	-1.43201	-0.528669	-0.253197	0.135962	2.55291	-2.18649	-3.34833	0.808085	0.297265	0.993472	-1.7568
-0.243111	0.975873	-1.15275	0	-1.22701	3.24683	1.39862	-1.67883	-1.05914	-1.37302	-1.67422	-4.98379	0.32	-0.394812	-0.126839	-1.23036	-2.68379	-0.993465	-6.28673	-2.13531	-0.879487	-0.417102	-3.89208
0.196819	1.42054	0.578036	-2.58335	-0.826451	3.42159	-3.67793	1.12235	3.40199	-1.15876	9.81397	5.49064	8.49459	-0.609369	0	1.50173	4.20222	-0.0703232	4.47836	1.73209	1.53038	4.9934	2.58846
-0.241316	-0.763723	-0.2886	2.22305	2.45914	2.80844	0.860837	-0.335383	0.0857265	-2.12022	6.42883	4.05678	5.98043	-0.570208	-0.139709	0.809721	-0.561854	1.10607	4.46104	1.30458	0.0294855	0	-0.138217
0.506409	-0.034462	0.2886	-0.0984898	7.03415	-0.694071	0	-0.561484	-1.72865	0.711747	8.28074	7.99064	5.2502	-1.68192	-0.509685	0	0	-0.42274	0	0	0	0	1.30541
0.717631	-1.48447	-1.4514	0	0.376648	0.298824	1.13638	-1.93298	0	0.706717	-8.08221	-16.9838	-6.08296	0.324165	-0.743689	-2.03673	-1.25616	0.878774	4.2705	0.199203	-2.08527	-3.02748	-0.136612
-1.11696	-1.8537	0.291971	-0.197271	-2.66682	0.0284775	-1.4225	-0.229885	-0.17452	-1.65684	2.00705	10.9872	2.81709	0.0482928	-0.606727	-0.412372	1.05195	-0.547667	-2.36898	0.198807	0.300571	1.12075	-0.410959
0.216978	0.550868	-2.06193	-0.710101	2.29018	-0.652948	0.855925	-0.461362	4.3578	-3.39839	0.967229	0.410731	0.607905	0.284454	-0.454222	1.23205	2.45193	-0.912973	0.171086	-0.497761	1.51902	1.30852	0.683997
1.57258	0.265463	0.888895	-0.066313	-0.757579	0.227655	-0.569802	-0.347424	-0.335009	0.492612	-1.57382	-2.04458	-1.69783	0.0529444	-0.639397	-0.956945	-2.54445	-0.281502	-1.72418	-1.10387	-0.296033	-0.501254	-0.478306
1.05406	-0.442831	0	-0.066357	0	0	0	0	-0.588979	0	0	0	0	0	0	-0.275103	0.611949	-0.216118	1.21004	-0.505818	-0.878439	-2.03053	0
0.712929	1.34017	1.46415	0	0.757579	0	0	1.38251	-0.677395	1.94653	-0.217533	-1.50161	-0.0685166	-1.13236	-1.11895	0.412372	3.83301	0.369439	2.2091	1.20969	0.31355	2.53178	1.69783
1.35668	0.741681	0.290276	0.380953	2.9742	-3.49163	0	-1.03509	2.76515	-0.241255	-3.97609	-2.21411	-3.34526	0.11187	-1.03793	1.76755	0.311722	-1.12505	-2.38106	-0.603017	1.49444	0.995033	-1.49257
0.182446	-3.68346	1.43887	0.280644	3.59751	-0.615256	-1.43887	-0.231482	-1.08019	0.961546	3.82354	0.514279	1.96498	-0.0826748	-1.12996	-0.269906	0.643625	0.0531328	1.70653	-0.505307	-0.308892	3.40666	0.477328
-0.474932	-0.126354	2.53892	0.296297	1.40353	0.322951	0	0.115808	1.73917	1.66077	-2.42838	-1.77731	-1.82333	-0.175302	-1.14287	-1.91002	-0.485808	-0.942558	-0.67912	-1.63436	0.0147308	-1.44581	-2.20091
0.824094	2.86649	1.6575	0.948805	-0.699304	-0.320114	2.00868	0.692044	-0.824407	3.69557	-1.53122	-4.84948	-3.09044	0.0730798	-0.521335	0.275103	-1.11467	0.637787	0.340136	-1.97614	-0.280257	-3.7591	0.138985
-1.65748	-1.08529	-1.10194	-0.915937	1.04713	-0.925002	0.848661	0.458716	-0.664454	-2.29368	1.1506	2.40838	0.364299	-0.772469	-1.05089	0.137268	0.565885	-0.250462	1.18145	0.732604	0.618468	1.74873	-0.278164
1.0091	-0.195365	-1.39472	-1.04056	1.03628	0.390143	0	-0.573725	0.332779	-1.40189	5.54122	2.97556	3.36106	-0.171927	-0.69745	-2.07908	0.488475	1.45331	0.335009	0.520022	-0.0587372	0.346107	3.62433
0.628528	-0.30268	-1.69976	-0.76667	-0.689658	-1.41488	-0.282088	-0.230415	-0.750316	-5.81277	-0.404041	-0.136771	-0.705719	-1.17701	-0.645979	0	0.342831	-0.214374	0.666669	-0.415801	-0.117578	-1.34164	0.268276
0.952877	-0.214209	0.285307	0.733459	-0.694447	-0.520695	-1.4225	-1.74524	-4.27415	5.34108	-4.84599	-2.64186	-1.57034	-0.498704	-0.0140895	-0.561799	-2.49123	1.65038	1.48395	2.87494	0	-3.25397	1.72647
-0.175045	0.276601	2.25362	-2.69331	-0.34904	-0.183395	-0.863315	0.81824	-0.262353	2.33655	4.29044	2.14793	0.57389	-0.994833	0.309511	0.421645	0.161084	-0.394815	-1.48395	-1.63269	0	1.94479	0.328623
-0.0295524	-0.841093	-0.558661	0.40865	0.34904	-3.07562	0.2886	-1.99889	-0.791213	-0.231214	-1.07713	0.985432	1.70217	-0.572226	0.112312	-0.421645	-3.68868	-0.542765	-1.1696	-2.71132	-1.00503	-1.78987	-2.92964
0.145886	0.385633	0.836825	-1.21379	-1.75751	-4.01574	-0.868312	0	0	-2.34203	-3.61671	-1.86266	-1.48781	-0.0355556	0.224247	-2.71251	-0.408515	0.446469	6.0328	-0.955929	0	0.617286	0.135044
-0.444286	1.20998	-0.278164	-0.0344056	1.05821	-0.89543	-0.875918	0.355661	2.44127	2.80392	0.916515	-1.25665	2.04882	0	0.433052	-1.45775	-0.069071	2.03938	2.8083	-0.213675	-0.237954	1.52675	2.20229
-0.560934	3.1511	1.93109	0.549075	-1.41345	-1.99702	0.292826	2.33929	4.54624	2.278	1.34824	1.49917	-0.139958	-1.03665	0.125374	3.03711	-0.455086	-0.895143	3.3286	1.06384	0	0.503779	-0.1321
-1.00448	-2.39345	-0.273598	0.512034	1.76371	-0.967332	0	-1.5143	-0.0823384	-0.451468	-2.55712	-3.16393	-2.76908	-1.8025	-0.0278474	-0.57143	-1.24721	-0.994972	-3.17487	-2.46397	0	-0.756624	-3.77149
-1.75733	1.17787	1.08993	0.136101	-0.701757	-0.0926942	0	0.81824	0.493017	-0.453516	1.87422	1.07287	1.7131	-0.455749	0.069604	-2.02612	0.145476	-0.112148	-0.153728	-1.20023	0.0595415	0	0.75214
-1.06059	0.21661	-0.271371	0.424125	-0.706717	-0.69714	1.1628	0.927005	3.38469	2.02482	-0.398672	1.67494	0.985923	-0.310257	0.208522	-0.439561	3.72445	-1.5547	1.67815	-0.329852	0.178412	5.17995	-0.889503
-1.13428	-0.642531	0.271371	-0.679466	0	-0.234559	0.2886	-1.51078	3.58015	1.32745	-0.690349	-1.21663	-0.140252	-0.496305	0.305047	-1.92741	-1.30276	0.0744558	-0.303031	0	1.18135	-3.42332	0.343054
-0.200819	2.12875	-0.271371	0.204325	-2.15062	-0.0459921	-2.92418	-0.234467	2.0432	-1.10498	1.74996	-0.324127	0	-0.551989	0.579792	-0.450113	0.0440259	2.08365	5.17484	0.439561	-0.574164	-0.199203	4.42135
-0.111988	2.23459	1.34955	-0.562901	-3.31522	0.699092	0	0.81824	0.894861	0.44346	1.61188	2.93484	1.87701	-2.76829	0.562763	1.04713	1.52882	-0.279669	1.71433	0.328408	-0.874922	-0.800805	2.0753
-0.123554	0.0250135	0.801072	2.45007	1.48702	1.33863	1.47278	0.348635	0	2.40449	4.74723	3.1106	4.11525	-0.257499	0.43704	-1.04713	0.0385245	1.2524	-0.710735	1.73352	-0.582569	0.100452	2.72255
-0.184821	-1.96159	0.265604	0.250063	1.10093	0.593864	0	0.462964	1.91182	-2.18349	-1.39021	-2.71388	-2.13769	-0.0109721	0.502958	4.26849	0.0673822	-0.248181	-0.715823	1.49257	0.463344	2.08651	0
-0.38761	1.76966	-1.33513	0.0832154	0	1.89742	0.583092	-1.16145	0.363505	-1.10989	3.28842	0.795517	1.3414	0.634402	0.729536	-0.578036	-0.918369	-0.204231	-0.28777	-1.17085	-0.0895122	0.0491521	-1.82797
-0.358318	2.25471	-1.62605	-0.0332779	0	4.28913	0	0.930239	2.15371	-0.447428	0.423687	0.0135437	-1.40895	0.467748	0.617286	0.865806	3.09335	1.12592	4.09373	4.60332	0.59524	3.14415	1.07562
0.847448	1.41099	0	-0.249938	0	1.36109	0	0	-0.284495	-0.674918	-5.33405	-4.42333	-5.05823	-0.157485	0.120329	1.14287	0.347777	0.323436	-1.67368	1.5221	0.0148357	1.41846	0.0629129
1.11625	0.0483014	0.54496	0	2.8779	3.12051	0	3.52509	-2.74385	2.8923	-0.83165	-3.01769	-1.93763	0.822694	-0.0935766	-0.712761	-0.772386	0.451061	-3.43381	-1.01215	0.0148335	-1.65684	0.439285
-0.180084	0.665787	-1.9205	3.68502	1.75751	4.36923	3.98913	-0.672648	1.7417	-2.44185	-0.150005	-0.39468	-0.435731	0.446393	0.106938	0.854706	0.551641	0.874822	0.145455	0.709582	0	0.0477213	0.934877
-0.120131	-0.408573	-0.834497	-0.241488	0	2.51663	-0.27972	-0.338028	0.287357	-1.35749	-0.537578	0.707851	1.01377	0.540527	0.120168	-1.28481	0.140958	0.749226	2.86553	-0.202225	0.059312	0.807797	0.247832
0.485314	-4.35618	0.27894	-0.598175	1.03987	1.29263	-1.12677	-0.907036	0.857148	-2.30425	1.9642	0.883232	0	0.346325	0.0533618	0.573067	-0.395183	-0.284637	-0.70872	1.90482	-0.579798	0.236351	-0.371978
1.5901	-1.29971	-1.12046	0.759231	-1.38891	1.75784	0	-0.800462	0.0710985	-1.64516	-2.98273	-4.95725	-3.14698	1.46258	-0.0266773	2.95588	-1.80751	-0.9544	-1.43269	0.692729	-0.88357	-2.00293	-1.69124
0.847733	-0.178549	1.39862	-0.937759	-1.40847	-2.17489	-0.568183	0.34384	-1.28757	1.41179	-0.152589	-0.159181	0.2228	-0.0786555	-0.494819	0.691088	-0.0624175	0.59937	-0.289018	-0.098668	0.0300797	0.192493	-0.0631912
-1.59431	-1.75127	1.10498	0.857264	-0.711747	1.61725	-0.57143	1.25073	0.574302	0.698489	-1.36176	0.627672	0.222305	0.136297	-0.322278	0.275103	-0.462139	-1.02039	-1.6047	-0.594061	0.300301	-1.16055	-0.697751
-0.184166	-0.660355	0	0	1.06573	0.631839	0.57143	-0.566574	2.19478	-0.932408	-0.710167	2.98552	2.48551	0.616254	-0.0403578	-0.275103	1.16568	0.180777	-1.18345	-0.697561	-0.752449	1.49653	1.0763
-0.196381	-1.07806	0.547947	-1.75472	-1.06573	-0.781244	0	-0.569802	-1.76621	0	-2.22957	-0.91882	-1.52786	0.379349	-0.0672993	-0.82988	-1.12708	-0.445248	3.93924	0.598207	0	0.763727	-0.189096
1.50619	0.413315	1.08697	0	1.06573	0	-2.01446	-1.14944	1.83621	0	-1.65331	-0.934794	-1.55156	0.455393	-0.20217	0.554018	0.351477	0.295337	-2.02319	-1.30067	0.301659	-0.572248	0.566217
0.426993	0.0701816	-1.08697	0	0.352734	0.409673	-1.1696	0.920605	-1.12598	4.35349	0.0462963	-0.358423	-0.597463	0.15993	-0.663285	-0.971555	0.527301	0.056564	-0.438918	-0.403633	0	1.09395	0.125392
0.593829	1.17695	-0.82305	0	-0.706717	-0.0744801	0	-1.15209	1.4055	-0.674918	6.10465	3.95285	4.96815	-0.0721947	-0.462838	2.07047	-0.349626	1.11021	1.31102	1.60485	-1.21214	0.236239	2.41423
-0.0219422	0.84578	1.0959	0	0	-1.31048	-1.18345	0.115808	-0.770582	2.01124	0.195759	0.122166	-0.858989	-0.47054	-0.739527	-0.410678	-1.31845	-2.51401	-2.63945	-1.20122	0	-2.09831	-4.6957
1.27198	1.11953	0.54348	0	0	0.900497	2.06193	0.692044	-0.0703482	2.62024	1.25245	3.64574	1.56922	0.170892	-0.855886	-1.10346	-0.253115	-0.857798	0.592594	-0.504797	-1.84621	-3.08319	-0.25674
0.70859	-1.2055	-0.816331	1.28656	0	-0.692783	0.291121	-0.57637	3.72971	-3.0637	-1.03538	-1.4719	-0.56778	-0.0155235	-1.32582	-0.277778	0.209353	-0.501673	-3.3036	-1.52986	0	0.644045	-1.09856
0.0230056	1.2225	1.08697	-0.0323677	-1.4286	1.31951	0	0	2.14629	1.76216	3.74512	4.60088	3.97681	-0.207211	-1.70024	0	0.0194524	-1.00651	-1.69365	-1.34508	0	-2.24729	-0.390625
-1.85008	0.356234	1.07528	-1.41823	0.716849	0.0221711	0	0.920605	-5.03508	2.15991	-3.3124	-1.87656	-3.97681	0.0207404	-1.59888	-3.25117	0.0874891	-0.829072	0.619197	1.13932	0	-0.404859	-0.983292
0.98508	0.160738	-1.88939	-0.857384	0.356507	-0.0130412	-0.291121	-1.96652	0.764689	0	-2.29293	-2.00311	-1.43372	-0.561507	-1.77255	-0.865806	-2.45918	-0.706723	-5.71584	-1.76628	-0.311042	-0.610378	-1.05961
-0.883794	-2.43862	-0.272851	0	-0.356507	1.64277	-1.46846	0.349855	-1.9581	-0.643089	-2.12085	0.0627725	7.57569	-1.19586	-1.84969	-1.31293	-0.544226	-1.73518	-0.98523	-1.58482	-1.88685	-1.74992	-1.74618
-0.973606	-0.00866213	-1.37554	-0.215499	-0.357782	1.31279	0	0	-3.15665	-4.84676	-1.02053	-0.293276	-7.86492	0	-2.7629	-1.77782	-0.416406	0.160746	-0.496279	-2.26181	0.632914	-0.520563	-1.70828
2.00043	-0.651808	-1.9581	0.281714	0	6.5796	-0.296297	-1.17097	4.83736	-2.51442	0.817258	-0.575077	-0.290065	-1.93933	-3.2403	-1.05185	-0.67089	0.114661	-0.332226	-1.64748	-1.58986	-0.785962	-0.483593
1.09737	0.417646	0	0.0330907	0	2.79301	-2.09903	0	-0.208551	0.921666	-2.93666	-2.77409	-1.83222	-0.907918	-2.23094	1.20122	0.338529	-0.275406	-2.1868	-1.56253	1.90482	1.61757	-0.834497
0.393276	-1.72531	1.12361	-0.0993049	0	0.488802	0.904984	0.821119	1.72478	0.913248	-2.85767	-3.75012	-3.30857	-1.11916	-2.21497	1.33434	-2.46132	-0.790022	-3.63676	-1.13123	0	-2.62207	-0.419875
1.25937	-2.18808	-1.12361	0	2.12774	-1.73128	-0.602411	-0.703403	0.477654	-0.455582	-2.54775	-2.82481	-1.8519	-0.478773	-1.58359	-2.08341	-0.14486	0.292371	-4.50933	-1.49	0	0.159278	-0.0701508
0.122876	1.95813	0.563382	-0.0165604	0.699304	0.494898	0	0.469484	0.813564	-0.457667	2.4039	0.608232	0.311042	-2.02275	-1.64359	-2.74407	-2.83025	0.24637	0.184332	-0.462964	-0.314961	-1.22766	-0.210748
-0.18525	-0.363685	0.560226	1.08715	1.03987	-3.80241	0	0.583773	-2.59933	-1.61853	-2.30565	-1.11147	-1.40737	-0.683445	-1.65351	1.68586	0.106462	-0.924012	0.733948	-0.116077	0.314961	-2.22654	-0.634923
-0.601128	-1.86569	0	0.08188	1.02917	3.30284	0	-0.700937	-1.74769	0.928081	0.0490918	2.61227	0.784318	0.158568	-0.86367	1.20847	-1.40912	-0.57743	-0.549956	-1.9942	0.345315	-1.38238	-0.425533
1.07892	4.14121	0.834497	0.489877	1.69209	-0.765237	-1.5221	0.234192	2.98737	1.6037	-0.492006	1.05304	-0.941922	0	-0.799791	0.29985	0.393118	1.25507	-2.04278	0.472814	-0.865534	-0.334635	2.10978
-0.454651	1.78215	-0.277393	0	1.66393	-0.557979	0	-0.117028	2.36737	-0.455582	-2.90238	-0.51009	-0.55358	0	-0.303816	-0.29985	-0.993851	-0.283105	3.32134	1.17235	-0.300752	-2.48882	-1.68425
-1.7677	-1.97344	0	0.276535	0.98523	-1.28822	0	0	0.533335	1.58554	-0.305111	2.35602	-1.76005	-2.9925	-0.628425	-0.150263	-2.03999	-0.860699	-0.545952	-1.29034	0.316556	-5.05099	-0.354485
0.891448	1.30563	0.277393	-1.6708	-2.31415	-0.82301	-0.924506	0.816331	-2.55906	-2.50297	4.04247	1.97104	1.20338	0.186404	-0.270539	-0.150489	2.45169	0.452209	-2.02772	-0.82988	0.0631912	5.50813	1.12996
-0.905161	0.171659	0.552488	0.395648	1.98682	-1.14098	0	1.26949	-0.615808	-1.15876	0.803804	-1.10074	-0.0797766	0.499246	0.234509	0.150489	-1.37167	-0.238437	0.371748	-0.716849	0.315358	1.58374	-0.563382
0.108457	0.0428688	0	1.68044	0	0	-0.933133	0	0.137174	0	0	0	0	0	0	0	1.95382	-0.0652967	3.46434	1.90029	1.62402	3.14856	0
-0.00357364	-0.982005	0	0	-0.657897	-0.384465	0	0	0.0685166	-2.59755	-1.58947	-0.987897	-3.65746	-0.30738	0.251935	0.749067	-1.30919	-1.28755	-1.26242	-2.74317	-0.605921	-4.67531	-0.637622
0.588818	-2.9339	-0.552488	1.09414	-5.07723	-0.947863	0	0.685717	-0.549452	-1.20338	-0.345679	1.24243	1.15228	0.948094	0.179565	-0.448767	0.179538	0.538262	-2.38762	0.48251	0.0155824	1.41445	0
0.0973564	0.746007	0.827591	-2.0696	0	-0.956933	0.933133	0.907036	3.38556	-0.973244	0.370325	3.5532	0.571197	0.14374	-0.215517	-1.05502	0.952131	0.216935	1.65902	1.43372	0.621313	0.894861	0.212993
-0.180584	0.538276	-1.10498	1.33076	1.37933	0.107473	-0.933133	0.338028	-0.668005	-0.982809	-1.61474	-4.16518	-5.00521	-0.97573	-0.143937	1.05502	-1.64485	-0.960517	-3.34604	-1.07336	-0.714844	0	-0.926262
1.42978	1.65827	1.92578	-0.225952	-0.687288	0.10611	-1.25788	0.448935	1.59578	2.67982	2.83935	-2.2541	3.11604	-0.920913	0.484958	-3.19905	-0.142411	0.0568128	-0.189215	1.31032	0	-1.45824	0.499823
0.243024	1.36688	1.62166	0.515714	1.70944	-0.499072	1.25788	1.00279	-0.728239	1.43201	-2.66419	-1.68084	-2.9451	-1.40341	0.571736	0.154679	1.09029	2.65287	2.61697	1.64323	0.0311867	1.45824	3.8426
0.50487	-0.213684	-1.89451	1.43635	0.33841	2.08596	0	-3.03906	-0.86754	-0.47506	-6.08121	-6.92318	-5.34981	-1.64046	0.302411	-1.87213	-1.16157	-0.831248	2.72992	2.18777	-0.156031	-2.4804	-1.51937
-2.47442	-0.317093	-0.273598	0.0791954	-2.04785	-0.596149	0	-0.228833	-2.03121	-0.238379	-0.479362	-1.32018	-1.91002	-1.1902	-0.142197	0.940446	0.743213	-0.143249	0.179372	-3.00601	-2.17846	-0.744776	-1.68425
1.60552	0.547853	0	-0.158454	2.38512	6.27255	0	-0.344234	0.613708	1.89131	-0.804078	2.80792	1.0959	-0.840418	0.177715	-2.20829	-0.201651	-0.195671	-0.719428	0.351494	0.0319132	-0.172662	0.212089
-0.664023	-0.205093	0.818558	0.537721	-0.675678	-1.96852	0	0.229621	-3.45816	1.39537	-1.08226	2.88729	-2.76261	-1.85283	0.601878	0.635932	0.152638	0.242203	0.360361	0.233645	1.5514	-1.80185	-0.212089
0.180894	-2.88114	-0.818558	-1.63795	-0.680275	1.17289	0	-0.575045	0.281096	-1.16145	-3.06612	-0.288916	-6.36052	-0.983801	-0.105951	-0.47657	2.40042	0.166407	-2.3659	-2.48093	0.0157072	1.97451	-1.56922
0.501845	-0.662517	1.36057	-0.128349	-1.72121	-0.467743	-6.45385	0.230415	-0.492439	0.698489	1.8344	-2.51815	-4.47684	-0.820903	-0.353983	0.47657	-0.800901	-0.571962	0.733948	2.13026	0.0157048	0.630555	-1.37534
-0.898179	0.194794	-0.542007	-0.434399	-3.53394	-1.82373	0	-0.808785	0.632691	0.23175	2.74362	0.15225	2.26347	-0.821254	-0.747467	0	-2.39799	-0.844338	1.99102	-0.234467	-1.23244	-2.31224	0.0728597
-1.50714	-0.044238	-1.9205	-0.0806517	-5.54671	0.780756	-1.3423	-0.465117	0.210011	-2.57928	-4.85892	0.789572	-3.731	-0.0773395	-0.14301	-0.795549	1.13563	1.2378	2.65268	2.77796	1.13817	2.31224	3.29543
-1.02237	-0.648113	1.10194	-0.0161381	-3.87645	-2.43012	0	1.38891	0.766287	0.237248	-1.61637	1.81065	0.736458	-0.264696	-0.0357846	-0.963089	-1.35551	-2.13304	-0.87643	-3.24855	-0.472665	-1.38092	-3.4412
0.011498	0.550721	0	-0.290933	1.95701	-0.347322	2.00676	1.59639	2.26425	0.472814	-0.746058	0.412629	0.104767	-0.109958	-0.556305	2.07509	3.07783	1.19064	-2.67634	0.470589	0.661107	1.5522	3.08822
-0.443021	-0.372737	-1.10194	1.0306	-2.35305	-0.278729	0.988476	-0.226501	-0.885866	1.17235	-0.490834	-6.37567	0.104657	-2.92883	-0.649939	2.95741	1.01933	1.36305	0.900096	2.4349	0.344558	1.41605	1.12519
-1.37269	0.867569	-1.67602	-0.530079	1.18345	1.48851	-0.657897	-0.911168	0.47798	-1.88241	4.44392	-1.37577	-0.524385	0.644328	-1.01949	0.459067	-1.68322	-0.278376	0	-0.459243	0.623443	-2.85245	0
1.67886	2.18831	0	-0.241877	1.94181	1.29657	-2.67574	-0.34384	0.678889	-0.476191	1.75636	6.38246	3.91803	0.0728067	-0.440125	3.00775	1.31279	-0.660056	-1.26242	-0.345822	-0.311236	0.346621	0
-0.199253	-1.60824	-0.282088	-0.745426	0.766287	-0.305253	0	-0.575707	-0.40678	-0.47847	2.31255	0.63597	-0.303798	0	-0.294497	0	-0.531577	0.592201	0	0	0	-0.346621	0.696867
0	0	0	0	0	0	0	0	0	0	0	0	0	0	0	0	0	0	0	0	0	0	0
-0.714134	-0.483156	-1.13638	0	-0.766287	1.98642	0	-1.39537	-1.98977	-0.240096	-3.40666	-2.33591	0.202634	3.92487	-0.443378	0	0	-0.532355	0	0	0	0	-3.24658
-0.363899	0.96399	0.285307	1.72543	1.52675	0.731365	0	0.583773	0.276817	2.14039	4.0954	3.90451	7.4108	-0.0891039	-0.948756	0.590844	0.780445	-0.073877	1.26242	3.29388	-0.374766	1.26511	0.214977
0.453139	1.18776	-0.57143	-0.111973	0.754721	-5.2319	0	0.696058	2.25496	-1.42182	-3.46483	-2.07862	-7.30963	0.0318319	-0.693991	0.294118	0.158529	-0.647586	-0.539085	-3.0632	0.281206	-0.573067	-0.718394
-0.148269	1.13121	0.286123	0.223821	0.749067	0.902137	0	-0.231482	0.874543	0.238379	1.46503	1.00189	0	1.60387	-0.301602	0.731532	-0.614376	0.0310672	0	0	-0.218648	1.36988	-0.1443
0	0	0	0	0	0	0	0	0	0	0	0	0	0	0	0	0	0	0	0	0	0	0
-2.67885	-0.898786	-2.02027	0	0	0.741196	-1.02216	-1.04835	-1.7568	-5.88405	-0.865572	1.00737	4.93197	2.55417	-0.0944376	-1.32064	-2.02862	1.44474	-0.904984	2.83949	0.561274	-3.63676	0.288392
-2.13079	-0.750877	0.291121	-1.7885	-0.749067	-2.19594	-1.03271	0	-2.76452	2.7399	-2.30843	-2.601	-0.192678	1.49094	-0.0945269	1.17476	0.680789	0	-1.0969	0	0	0.23488	0.931572
-2.59702	-1.88017	0	0.0162562	-0.376648	2.19232	0.689658	0.816331	-0.915177	0.245399	-5.72075	-7.9779	-3.93364	0.408237	0.1512	-0.585653	-0.502039	1.06221	-4.70454	-2.2651	0	0.99213	-0.285714
-0.463629	-1.05605	-0.291121	-1.02934	0.751883	-3.88122	1.02565	0	2.23786	1.45988	-2.02207	-1.01646	2.18263	0.615203	0.640062	-0.441502	-2.08899	1.34946	-6.56953	-0.920605	-0.937214	-1.22701	1.56142
1.57397	0.489477	1.15943	-0.907372	-1.12996	-3.56313	0	0.116077	-1.88487	2.38675	-0.270718	-1.95845	-3.80046	-0.837125	0.393296	-1.18696	-0.921563	-0.087889	3.83498	1.03509	0	0.644596	-1.13316
-3.85005	-2.98261	-1.4514	-0.0828981	0.754721	-1.6448	0	-0.465117	-1.92108	0.470589	-5.51052	-1.35113	-3.73875	-0.433266	0.428985	-1.50379	-2.35318	-0.172378	-4.04095	-2.43208	-0.0470921	-3.44657	-0.356761
-0.980999	0.0640059	2.31224	0.231942	-4.6162	-0.657867	4.00053	1.73315	-0.865806	2.77796	-3.23443	-1.77875	-2.46397	-0.79315	0.501254	0.604231	-0.831403	-1.11674	-3.14162	-1.17926	-0.0157023	-0.363417	-1.51245
0.820031	0.510577	-0.286123	0.0992392	2.71861	-0.473903	0	0.571104	2.5046	-0.687288	0	-2.87411	-2.74894	-0.286106	0.388135	-0.301659	1.04815	0.103706	4.16727	0	-0.0157048	1.80402	3.00237
-1.16085	0.0454607	0.286123	0.65909	-0.383878	-0.680156	0	0.227531	2.4434	-0.923794	2.59586	2.30769	3.28977	-0.869411	1.06423	-0.758154	0.721	-0.721746	-1.02565	-0.953523	-1.59902	2.18105	-2.71251
1.85673	-0.200182	1.41846	-0.296053	-1.94181	-2.19494	0	-0.227531	0.137836	1.15342	-5.8365	-4.1242	-5.08959	-0.363469	0.600493	-2.77796	-2.10366	0.718994	1.43298	0.477898	-0.0159604	-2.12147	1.29405
0.0939231	-0.154961	0	-0.694218	0	0	0	0	-0.275862	0	0	0	0	0	0	0	1.1602	-0.0917726	0.607905	-2.77964	-0.688719	2.29624	0
0.424079	0.118521	1.67602	1.72659	-0.392928	-1.70494	-0.65574	0.454546	-0.345901	0.457667	-3.3843	0.87453	-3.8177	-1.32954	1.27987	1.39862	0.835921	-0.275824	0.804833	2.1819	-0.0803923	0	0.782644
-4.3572	-2.78091	0.276625	0	3.48198	-3.94621	0	-1.14026	-3.52646	-0.687288	-6.49367	-0.455322	-3.72415	-0.306931	0.749468	-2.02657	-1.35118	1.46507	-2.63975	-1.69291	-0.0160862	-0.466745	0.141643
1.97286	1.37702	-0.554018	-0.654239	-1.14724	0.446559	0	0.457667	1.77877	0.687288	10.217	1.35041	3.48803	-0.907493	0.920198	2.94824	1.75243	-0.750418	2.23814	-0.734397	-0.742778	2.19789	-1.06725
0.655314	1.60414	0.82988	0.147577	-0.385357	0	0	-0.228572	0	0.22805	8.18373	4.00826	13.1609	-0.285289	0.754588	0.609758	0.377178	0.590607	1.9921	2.30733	0.0324097	-0.458716	0.925603
-1.87853	0.335891	0	0.474051	0.769235	2.24015	0	0.342662	-1.77877	1.13251	-5.64433	-5.29214	-9.79042	0.0190446	1.11267	0.30349	-0.682212	0.465102	-2.59755	3.42216	-0.389611	-1.73917	1.12757
0.269888	0.036245	0.275103	0	-0.383878	0	0	-0.457144	-0.431655	0.673403	-2.57324	2.53297	6.63226	0.569658	0.912148	-0.15163	2.82793	1.06437	1.20726	0.578371	-0.947874	1.39375	1.66786
-2.28145	1.59083	0	-1.62766	-1.16055	0.402347	0	0.684934	-2.55582	0.223464	8.9941	-0.47356	1.69675	0.28991	0.682946	1.50605	1.1048	-0.128956	-1.20726	1.03271	3.26309	-0.17316	0
1.03382	0.106942	-0.827591	-0.832229	-0.389864	6.82459	0	-1.72121	-2.09275	-0.896867	2.71648	5.10745	3.10584	1.28808	1.15041	0	-1.23688	0.0636033	1.00706	0.795911	1.3262	-0.753845	-1.73797
-1.21438	-1.96085	1.64839	0.832229	-0.784318	0	0	1.37933	-1.1394	1.11983	1.34592	1.88362	0.913248	0.173805	1.30349	0.447428	0.664126	0.0447668	0.400001	-1.94403	-3.8042	0.348635	0.210158
3.76679	1.20984	-0.272851	-0.332061	0.784318	0.969101	0	-0.343054	-1.69496	7.5062	-6.25204	-2.48684	-2.66136	-0.410168	1.38502	-0.896867	0.0218794	0.855658	0.199402	0.115407	2.35078	-1.87359	0.279525
-3.53095	1.93749	0	1.19029	-1.57484	1.43755	0	0.798635	0.851069	0	-5.59314	-8.89951	-2.41482	-0.186997	1.30147	0.29985	-0.361624	0.0195233	-1.40424	-0.462429	-1.24902	-0.711747	-0.139665
2.51572	1.07683	-0.547947	0.589876	1.18345	-0.476461	0	-1.37302	-1.00659	0.412372	7.68991	3.01761	7.27407	-0.0873853	1.02911	1.33831	1.82753	1.07059	-0.404859	-0.232019	-0.614193	1.41846	2.55274
-2.27937	2.41743	-0.550966	-0.655633	-1.18345	0.622806	0	-0.346221	-0.155763	-1.24225	-2.06515	-0.444508	-0.59465	-0.287662	1.25588	-0.444116	1.14146	1.2987	3.19388	4.09614	0.517466	0.292998	1.42038
0.559973	-2.4784	-0.832182	-2.86925	-0.397615	-1.10155	0	-0.812541	2.38748	-1.25788	-2.46452	-2.90433	-3.2326	-0.00626272	1.06852	-0.744605	-1.25471	0.0441847	0	0.222717	0	-4.61021	-0.944676
2.6645	-3.10603	-1.12046	-0.254173	0.397615	-1.33966	0	-0.584455	1.58554	-1.48781	-3.79772	-3.08174	-1.13579	0.300169	0.49891	-2.57395	-0.432597	3.65186	-2.58721	1.54528	1.25022	0.671758	4.05236
-0.352039	-0.45944	-0.282088	-0.561465	0.790518	-0.86472	0	0.117165	0	-0.429185	-6.07088	-4.80307	-7.2113	-0.243819	0.496433	0.611623	-2.17489	-0.365613	4.14669	2.05969	0.0318522	-1.5333	0.519482
-0.237563	-0.135532	0	-1.66886	-1.18813	-0.454492	0	-0.117165	-0.0749344	0.643089	-1.51354	3.2105	-0.671895	-0.169146	0.416957	0.152323	-1.42796	-0.111539	0.386101	-0.645858	0.666563	-2.63008	-1.2382
-1.6163	-1.13663	0	0.415513	-2.82847	-0.990531	0	1.28132	-2.35126	-0.213904	-5.02618	0.60146	2.22231	-0.439865	0.614536	-1.53377	0.09546	4.61839	0.384616	2.34803	-0.698416	-3.68378	4.29967
2.09566	1.82144	-0.566574	-0.571777	1.22201	-0.498969	0	0.115674	0.612091	-0.214362	11.2892	7.9769	6.07539	-0.75224	0.473681	-0.309598	1.17176	-1.15157	0.955117	0.944889	1.87777	2.91944	-0.819935
-0.610242	0.385391	0	0.589052	0	0	0	0	0.380663	0	0	0	0	0	0	-0.466201	1.44838	-2.32878	-1.91944	-2.00534	-2.26079	5.595	0
-0.320698	-0.179067	1.41046	0	1.60646	4.66325	0	0.691247	0.30349	1.27934	-0.925139	-7.33864	0.206612	-0.413289	0.471448	-0.312013	-0.25182	0.827837	-1.36587	-0.534475	0.0319744	0.842871	-2.56589
1.33776	-0.548144	0.836825	1.219	1.18813	-3.55274	0	0.458191	-0.455582	1.47216	5.45925	2.27646	4.93306	0	0.0151711	3.98215	0.601128	-0.257036	0.782783	0.641028	0	0.776355	0.194742
1.26992	-0.487762	-0.557105	-0.478961	0.784318	-0.765012	0	-0.228833	-2.38748	-1.04933	0.292921	20.5416	-0.689998	0.533775	0.242424	0.449439	-0.278255	0.419812	-1.17648	-0.641028	0.0319642	-0.656523	0.0648298
-2.05873	0.370555	0	-0.0514536	-0.784318	0.267749	0	-0.344234	-1.4129	-0.211193	-3.91037	-0.863849	-4.44967	0.499416	0.272027	-0.149589	1.05436	1.19622	0	0.853794	0.0159783	2.65895	0.194238
1.00181	2.01829	0.27894	-0.257666	-2.79459	-3.78323	0	-0.115009	0.63042	-0.636269	5.84156	2.87721	2.24958	-0.303145	0.211066	0.597017	1.57163	-1.82247	-1.19049	-2.03979	-0.0639284	2.24858	-1.49889
0.178912	-0.62079	-1.12046	-1.49024	-1.63269	0.674527	0	-1.04107	8.72077	-1.50056	1.48713	-25.3681	-2.9761	0.107469	-0.030125	0	-1.06472	1.27309	-0.600602	0.756352	-0.304219	-1.84125	0.654453
1.33945	-1.72279	-0.564973	-1.17659	-2.07908	-0.91204	0	-0.349447	-0.0720202	-1.08579	-4.79268	4.29276	3.17812	0.265018	0.030125	0.297177	-0.0161381	1.86933	0	2.23532	-0.321234	-1.0508	0.714985
0.540734	-0.453557	-1.42656	-1.01199	-2.12322	3.82976	0	-0.937873	2.06781	0.652886	3.40114	2.53543	0.703874	-0.012604	0.13545	1.32647	-0.81567	-0.812326	-2.2336	-2.12774	0.0321699	-2.13531	-1.50084
-1.9696	-0.437358	-0.28777	0.445118	-3.05035	-1.46734	0	-0.235849	-1.63646	-0.652886	0.793026	-2.66196	-0.301054	-0.309295	0.0451094	0.583943	2.26307	-1.85264	1.02146	-0.215285	0.385233	1.78258	-2.9355
2.2244	0.510066	-0.2886	-0.284647	0	-1.49058	0	-0.35482	3.03803	0.218103	3.38594	2.18667	2.48152	0.636483	0.120192	-0.583943	-0.196386	1.41398	0.40568	-0.974561	-0.128246	0.352734	0.741993
-0.649785	-0.63799	-0.289436	-1.83392	-0.888895	-0.739038	0	-0.47506	-0.208986	-0.65574	4.91683	0.342434	0.878483	0.0439629	0.239952	-0.734757	0.477024	0.0405472	3.38341	2.57802	-3.2608	1.86052	-0.606675
0.546276	0.628904	0.289436	-0.50937	-1.80185	-0.0349296	-4.37044	0.356507	1.65979	-0.219539	0.522043	0.869817	0.870833	-0.113087	0	0.441502	1.45927	0.163644	1.16733	-1.2807	0.989454	0.517094	1.47654
0.25741	1.42537	0	-0.493648	2.24729	-1.24444	0	0.236967	1.29474	1.95871	-0.028931	-3.26267	1.14944	-0.182465	0.0149779	-1.3304	1.3869	1.68875	1.34488	0.96206	2.63962	3.10321	1.12621
1.47573	1.69639	0.2886	0.875918	5.19597	-2.73098	0	1.75958	0.135318	0.215285	3.83189	1.19878	4.19642	0.0188911	0.209455	-0.14892	3.47971	1.1561	4.84266	2.10534	0.0159808	3.70817	3.55909
0.268661	-0.0264236	0.28777	1.17404	0	-2.03152	1.36521	0.34823	-0.746525	0.643089	5.39353	5.23258	4.98768	0.0503588	-0.0149466	0.742394	-0.577432	-0.249712	3.74709	4.282	0.922545	0.480642	-0.254615
-1.17176	0.754721	0.573067	0.394266	2.50013	3.5296	0	0.462429	1.2187	0.851069	-3.29921	0.0364731	-2.10719	0.176056	-0.434425	0.589972	-2.62002	0.0938134	0.698083	0.298954	-0.603464	-8.85139	-1.41209
1.65237	0.366525	0	-0.916366	0.410678	1.02043	0	0.230415	-1.35503	0.633582	2.55768	7.73391	2.54065	0.301092	-0.225445	0	1.35904	-0.971554	-1.93158	-2.51902	0.0318522	3.43283	-0.453516
1.29289	-0.34904	1.13638	-0.34355	-0.82305	-1.23266	0	0.34463	1.35503	1.87701	0.397931	-1.01773	0.345423	-0.0563857	0.0300888	0.732604	-0.883568	0.754625	1.2335	-0.102093	-0.574898	-1.53021	1.16205
0.0490492	2.05907	0.282088	0.307442	0.412372	-0.483503	3.66097	0.571757	1.86672	0	1.94028	0.781188	0.772868	0.28786	0.120265	1.73666	1.7193	-0.636935	0.871845	-0.512034	0.670394	0.853005	0.448288
0.694679	1.58862	0.84152	0.414452	1.63269	4.69441	0	0.11396	1.70273	0.412372	-3.46092	-2.15448	-1.81274	0.374229	0.150128	-0.431345	-0.301266	-1.24432	-1.57484	-1.13579	-0.0318218	-2.52307	-0.83414
-0.99255	-0.905903	0	2.01164	1.60646	0.905641	-0.327333	-0.22805	-0.390371	-0.205973	-2.39402	-0.545952	-12.7081	0.118214	0.134922	1.14614	-0.120761	-0.828224	-0.176523	-0.72955	-0.766777	-0.640841	-1.1014
-0.353266	1.61974	0	0	0	-0.575866	-1.65293	0	0.843887	-1.24483	5.64699	2.94542	14.8625	-0.255269	0.0599071	0	-0.312642	-0.23883	1.40353	0.72955	0	0.52463	-0.391645
2.60181	2.69963	0.27894	0.0352423	0	-0.126285	0	0.682597	3.18093	-1.68425	4.4282	1.6236	1.69066	0.689594	-0.0149734	0.284495	2.90683	2.71745	2.57968	2.56293	0.0641231	3.37271	4.78866
-0.102833	0.649511	-0.558661	0.0528402	-2.01214	0.135887	-1.00503	0.113314	0	0	-1.75796	0.405949	0.167504	0.444775	0	-0.855925	-0.422792	-0.782697	0.676822	-1.63269	0.0320461	-2.67746	-1.00251
-1.53999	-0.779921	0.558661	-1.70489	-1.22701	0.0137157	0	0.564654	1.73809	0.634923	1.1086	1.87564	-0.755988	0.743041	-0.254892	-1.00793	0.285335	-0.596888	1.17353	0.615387	0.287954	1.26221	0.125865
-1.15888	1.89051	0.278164	1.28138	1.22701	4.4317	-0.337268	0.896867	1.46612	0.210748	3.7861	3.21771	-0.0843526	-0.0856898	-0.632532	-2.49097	-0.0393082	0.495524	0.82988	1.32049	0.953902	0.227791	-0.0629129
-2.1314	-1.61359	-0.278164	0.370665	-0.407333	1.33586	1.3423	-0.671895	0.965608	-0.845671	-7.95603	1.01627	-4.04704	-0.128673	-0.287465	0	-2.29667	-2.33484	-4.22004	-3.17812	0.0632711	-1.08666	-3.45745
0.22363	-2.07921	0.278164	0.0352299	-0.819677	0.0737659	0	0.560226	-4.29514	0	-0.366397	2.67829	4.97103	-0.658201	-0.166806	-0.148478	0.110569	-0.231594	-0.518584	-0.312989	0.347277	-0.518883	-0.457069
0	0	0	-1.22266	0	0	0	0	0	0	0	0	0	0	0	0	0	0	0	0	0	0	0
0.211296	0.422623	0	0.0891027	-0.412372	-0.591656	0	-0.111794	0.625002	1.47526	-0.394063	0.430693	-6.03111	-2.14592	-0.761734	0	0	-0.0254016	0	0	0	0	-0.0654665
0.0341867	-0.980563	0.82988	0	1.23205	1.25311	0	0.557726	-0.499689	1.24742	-2.88405	-0.264241	-2.33613	-0.322102	-0.505942	-0.148699	-1.18237	0.493764	-1.92482	-0.944889	-0.981797	-2.33929	-0.591135
0.10446	0.358438	-1.66671	-0.786842	0	3.52398	0.664454	-0.893861	0	-2.51059	0	3.44029	-0.181984	0.132756	-0.200015	-1.65045	-0.315634	0.0375048	0.704228	2.3972	0	-0.236967	0.460073
-0.740798	-0.208238	-4.58533	0.501434	-2.06193	3.64235	-0.664454	0	-3.18093	1.88883	0.0812458	-1.32345	1.26699	-0.0189544	0.491628	0.151172	-0.459959	0.617617	-0.175593	0.513612	0.0636335	0.709223	1.36765
-2.11189	-0.14185	0.875918	1.1721	0.415801	0.374921	-0.33389	0.782564	-1.17036	0.621764	-4.37137	-2.22273	-3.85015	0	0.44346	0.452148	-0.426068	-1.7951	-1.7731	-1.96592	0.665718	-2.02267	-3.55534
-0.715692	-2.37432	0	1.07122	-0.415801	-2.09307	0.666669	-1.11983	-3.05469	-0.414079	-3.04359	-0.523542	-5.57301	0.00631852	0.274265	0.599702	-1.67034	0.507626	0	-0.313972	-0.0316006	0.539408	0.86754
0.525657	-1.48164	0.579712	-0.297385	0.82988	-0.694876	-1.67508	-0.904984	-0.134953	-0.207684	0.639351	0.538676	-1.29291	0.0126358	0.212798	-3.03513	0.282073	0.881581	-1.07915	0.731074	-0.984604	1.36541	0.925933
0.643037	0.700483	0.2886	-0.0701017	-1.24742	1.11022	0	0.340329	-0.202771	-2.31346	8.91817	1.28559	6.11544	-0.316376	0.212347	1.22513	0.244862	-0.580856	-2.0092	-1.99691	-0.962163	1.28883	0
-1.58056	0.832444	1.14614	-0.316067	0	-0.762791	0	-0.45403	-1.08845	-1.06953	-1.17272	-0.524267	-0.566574	0.524637	0.468597	-1.07117	-2.9358	1.46683	-1.11318	1.37061	-0.0967274	-2.35582	0.65617
0.699638	-0.866921	0.284495	0.351124	0.833338	-3.68431	2.00676	1.46812	1.82994	0.429185	6.33649	6.70135	7.03808	0	0.376308	2.43173	-0.0375164	0.103955	0.186393	0.209205	0	1.83058	0.456771
1.48041	1.51434	-1.43064	1.78902	0.414079	-0.650847	0	1.22564	-3.34616	-2.60318	1.79556	3.0363	1.92314	-0.480284	0.0150229	-0.150263	0.31577	1.28046	1.84507	2.47691	0	0.175387	3.76921
0.742686	1.17336	1.71433	1.14678	-0.82988	-0.838851	2.61453	0.991744	-0.417537	0.875279	4.02089	1.40704	5.47505	-0.11409	-0.0751371	-0.452148	2.32397	-0.253986	-0.182983	0.913248	-0.0322633	3.44466	1.36988
-0.195627	-1.70973	3.06858	1.20106	1.24225	0	1.91699	2.27652	-0.349284	1.94181	-1.00216	-0.41734	-1.32015	0.215394	0.180234	-0.454202	1.24522	-0.559607	-0.91997	0.403226	0.0322633	1.40098	0.493524
1.12829	0.731482	-0.275103	0.151222	1.63269	3.41969	3.72714	-1.40315	0.627836	-0.213904	-0.601325	-1.27624	-0.91782	-0.641211	0.0899955	-0.303952	-0.010313	-1.33485	2.55488	-0.100654	0.128949	0.111235	-0.493524
-0.643416	-0.152659	1.36801	-1.69323	0.404041	-2.29048	-1.22701	0.75799	5.6772	0.213904	-2.56581	-2.63046	-1.35023	0	0.0149914	0	-0.408217	-0.0780259	2.31533	-0.707431	0.0322113	-0.893362	0.800743
1.7887	1.41583	0.271371	-0.736999	-1.21705	1.25859	3.3387	-0.215983	2.0807	2.94758	-1.64715	-1.89052	0.592971	-0.959946	-0.059979	-2.62158	0.449462	0.414627	-0.529569	-0.814668	-1.29661	2.49251	-0.122775
1.41917	0.858231	1.07818	3.3827	0.407333	-1.76727	-1.50379	3.71395	-0.775198	2.66136	2.82827	3.61506	1.67508	-0.625708	-0.180153	-0.156372	2.1368	1.54271	2.96447	2.12451	-0.490598	1.4123	4.50391
0.231066	0.380921	2.38422	0.992892	2.01214	-2.84295	8.97853	2.57084	2.49773	3.57181	4.40262	0.789704	5.10026	-0.304592	0.225141	-1.10151	0.799059	0.050219	1.70362	1.88404	1.67443	0.591559	0.76046
0.350698	-1.89401	-3.19176	1.19487	4.28916	-3.62318	0.552488	0.607289	0	-1.76996	1.07102	1.97758	-1.35084	-0.775374	0.478613	0	0.394655	-0.379259	3.97403	2.23419	-0.225952	-2.44246	0.0582581
1.79599	-0.828898	-3.57672	-0.0325468	-2.31671	-0.0395491	0	-3.17812	-2.0448	-5.92615	-0.977434	0.861355	0.159872	-1.16453	0.506029	-3.05245	0.576686	-0.680673	-0.815	-1.25666	0.0323102	-0.109951	-0.584114
0.497176	0.169722	1.39084	-0.146592	-1.1788	-0.232155	-2.79348	1.34508	2.61245	0.629593	-2.58216	-0.995565	-0.721446	-2.15393	-69.3147	0.974034	-0.736358	-0.0797683	-0.821697	-1.27266	0.0161512	0.439079	-0.0585995
1.32245	1.39768	1.37176	0.633685	3.4955	-1.09702	1.68543	1.83305	0.938974	2.07047	2.01931	3.45169	2.54184	-0.88974	70.3485	2.39437	-0.656331	0.0813791	-1.49629	-0.990107	0	0.655024	0.642713
-0.588858	-2.29195	-0.272851	-0.0648088	-0.38241	-0.117563	1.38315	0.201613	-1.25393	-0.82305	6.31117	0.897678	3.16507	0.0272851	0.615206	-0.157853	-1.21373	0.518943	1.16571	1.38342	0.0322945	0.108755	0.580722
-0.382097	-0.282716	1.62605	0	0	-0.791957	0	0	-0.950879	0.412372	1.62071	0.857825	1.95642	-1.24217	0.843396	-1.43201	0.866289	1.00608	2.12948	2.0399	0.129074	1.02731	1.66527
1.77574	0.556104	0.803217	0	-0.769235	2.04482	1.09291	0.402011	4.11786	0.615387	-0.108684	0.165595	-1.0487	-0.352807	1.08016	-0.80451	2.15073	2.47953	1.76711	2.37541	-0.0967898	1.60089	1.91771
-0.0341404	-0.891256	0	-0.536281	0	6.19085	0	1.49331	1.39608	-0.204708	-2.71151	-2.34366	-2.28494	-0.604735	0.940982	0	0	0.154638	0	0	0	0	-0.785198
-0.814894	-0.422688	-3.25232	0.924506	-0.775198	-1.58358	2.94533	-1.39306	0	-3.122	-2.48882	-2.75419	-1.55283	0.0766631	0.904089	0.644125	-2.71727	-0.685317	-1.76711	1.49117	-0.647671	0.790935	-1.93298
-0.462124	0.155481	-0.82988	-1.87409	-1.9647	2.78899	-1.32804	0	2.20575	0	0.274537	-1.0231	-0.470589	-0.111529	0.923859	0.799365	-0.99412	-0.28512	-2.62741	-1.86747	0.32436	-0.790935	-0.402647
-0.650582	1.17553	-0.836825	0	-0.796817	-1.02572	0.267023	-2.53692	-4.52293	-4.7628	1.2713	-0.264201	0.0785855	-0.307349	1.20492	1.10848	-1.59582	-0.560138	2.62741	0.282353	0.0971031	-4.60412	0.0576203
-2.52207	2.07672	0.836825	0	-0.803217	2.61981	-1.88431	2.43667	-0.432767	0	0.562368	0.42644	0.0785238	1.07161	1.29934	1.87213	0.48298	1.22416	-2.12948	0.749067	0.0323468	0.497651	1.31618
0.326503	0.906564	-1.9636	-1.69214	0	0.366584	1.34955	-0.805644	1.04778	-1.33931	-2.56745	-4.70187	-5.31955	-0.590054	1.00055	1.68586	-2.6671	-1.90981	-2.17582	-1.78828	-6.72157	-5.20774	-3.23541
0.654245	1.60161	2.79348	-0.60413	-1.21705	1.43219	-0.268457	5.69899	0.793897	1.11733	2.79151	3.30753	5.39801	0.41687	0.550079	0.454891	-0.154424	-0.379084	-1.36288	-0.954206	5.07484	1.21284	0.293169
-0.855877	0.487687	-0.82988	-0.506245	0.813013	1.63551	0	-0.478699	4.11139	-0.445435	3.36703	5.68463	4.07279	0.0970201	0.507141	0.302115	0.563292	1.06474	3.70413	2.27498	0.737044	1.98927	2.20044
-1.83711	0.25913	3.0098	-0.372882	-1.63269	0.928686	6.50424	-0.57748	0.756037	1.98902	0.926232	0.187478	-1.28838	0.848369	0.650171	-0.150943	-1.93693	-0.550671	0.330033	-0.941627	0.780238	-2.912	-1.96652
-1.42219	0.0323441	1.0724	0.406711	1.63269	-0.923858	0	-0.677969	-1.28282	0	-0.904594	0.605282	1.58914	0.418081	0.580247	-1.5221	0.188919	0.260767	-2.50222	-1.42928	-0.0323887	0.115808	0
-1.303	2.22267	0.796817	-0.0169133	1.20726	-1.27294	0	0.291121	0.81824	1.52012	3.1938	2.01462	3.24992	1.19656	0.498427	1.21953	0.290776	0.346373	-0.169062	1.52384	-0.813145	0.921666	0.756477
-0.773705	-1.32927	0.527706	0.691111	0.796817	1.8626	0	1.34747	-0.2331	1.28481	1.18739	3.39582	1.8719	0.26996	0.378714	0	0.204115	0.318607	-1.53456	-1.52384	0	0.856414	0.520383
1.29681	-1.22543	0.524936	1.68239	0	-0.310041	0	-0.479158	0	0	-0.352661	-1.0454	0.498044	0.0539047	0.532988	0.453516	-0.770291	-0.642166	-1.03628	-0.770717	0	-1.83597	-1.10178
-1.19579	-3.44108	-2.38422	-0.181863	-1.19762	1.64255	0	-0.2886	-0.467837	-1.06953	0.083091	0.202597	-0.0709975	-0.107839	0.852058	-1.67304	-0.640124	-1.72888	-1.92819	-2.34844	-0.196143	-0.93078	-3.62165
0.811201	0.527529	1.33158	-1.65183	-2.43915	0.990789	0	0.480539	1.91588	-0.215285	-1.02265	-0.794315	1.05971	0.161714	0.819362	-0.924506	-0.114351	0.254979	0.353357	1.47423	-0.196528	-0.644974	-0.242131
1.6985	-1.04942	0.527706	0.720814	0.819677	-1.47978	0	-1.93617	-1.44804	-1.08343	0.939562	0.647012	-1.05971	1.26444	0.483339	-2.19101	-0.240018	-0.359877	-3.22609	-1.7717	0	-2.02027	-0.486028
0.141228	-0.261968	0.262812	-0.267603	0	-1.3994	0	-0.391773	-0.761351	0.434783	-0.166389	0.679463	0.989407	-1.04923	0.152149	-1.75583	0.967451	-1.09233	-0.914919	-0.0993542	0.343671	0.836825	-0.7335
-0.82929	-0.373008	1.8206	2.3176	-0.408999	1.53494	0	2.99684	2.7256	0.432901	2.1825	-0.648757	1.46599	-0.215213	0.0380011	0.801929	1.07062	-1.0078	-3.93678	-1.20001	0.342494	-0.597017	0.306279
-0.0583218	0.195155	0.51414	0.114482	0.408999	0.168576	0	-0.573067	1.13767	3.18837	-0.203874	-1.9907	-1.11499	-0.628105	-0.114047	0	0.219164	0.0498959	4.12043	0.901358	0.0813736	0.537475	0.305344
1.42617	-0.263125	1.2739	2.34241	2.41947	-1.01814	0	0.763362	0.225989	0	0.732008	2.49905	-0.351001	-1.0283	-0.342923	2.52379	0.818936	-0.899482	0.183318	-1.91249	0.0325309	0.297354	-0.734397
0	0.0509814	0	-0.0638876	0	0	0	0	-0.169444	0	0	0	0	0	0	0	0	-0.45155	0	0	0	0	0
1.26729	0.356144	-2.04611	0	0.793655	3.91507	0	-0.763362	0	-3.62127	-0.528134	-2.93218	-0.28169	-1.61472	-0.471849	1.54563	-0.504395	0.647743	-1.10498	-1.32994	-0.0813471	0.177989	-1.54754
-0.632767	0.329573	2.04611	-0.608976	-1.59366	1.20719	0	2.36641	-0.169731	1.93347	-0.0611185	1.34968	1.2614	0.125139	-0.602605	-0.615387	-1.3882	-0.34731	1.10498	0.513612	0.0325468	0.473094	-0.249844
0.750125	0.378932	0.756624	-1.47359	0.400802	1.86327	0	4.39229	2.79192	3.75827	0.142552	-0.279686	-0.909415	0.926701	-0.813485	0.768643	-0.32436	0.0396593	-1.47604	-1.13345	0.0813207	-0.0590145	0.374532
-0.15394	2.29322	0.501254	-0.343166	0.399202	1.04492	0	-1.17066	3.30385	2.42927	-0.91997	-1.47974	-0.917761	1.32661	-0.585139	0.153022	1.70724	2.39398	2.93061	1.44035	0.0812546	0.294725	2.03522
0.753965	2.53055	2.22506	1.67198	-1.20242	5.09626	0	-0.181324	0.478343	2.37165	2.07324	-1.14991	1.05821	1.0138	0.143351	0.457667	-0.170485	0.460274	0.360361	1.01627	0.0324834	1.98142	0.608645
0.81912	0.551098	0	2.65284	2.39055	0.268665	0	0.993236	1.36916	0.195122	1.31896	0.338086	2.49493	-0.424543	0.933254	-1.07117	-2.71324	-0.339368	-1.085	-0.303798	-0.553657	-0.927543	-0.608645
0.120934	3.63676	0.730819	0.43798	1.17418	-2.04992	0	3.27029	2.83597	2.31224	1.69295	2.09221	2.36737	0	0.847898	-1.23841	0.0930971	1.44832	3.22031	2.99723	-0.130719	4.27537	4.18471
-0.097873	-2.3547	-1.22102	-0.0780701	3.44202	1.60139	0	-0.26121	0.557669	-5.48082	-1.3956	-0.757461	-1.68524	0.384188	1.0815	1.69888	-1.47228	0.803439	-2.13531	-2.2898	-0.13089	-0.279408	1.16416
0.0694681	0.376737	-0.739831	-0.910096	-2.28147	0.717518	0	0.174216	-0.202429	-2.44411	-2.87139	-3.69962	-2.33848	0.174755	0.932114	0.610689	-0.100039	0.309841	-0.360361	0.301659	0.0327386	-0.111982	0
0.272354	0.023499	1.71783	-0.363206	-1.16055	-0.0303168	0	-0.786374	-0.507873	-1.45382	-0.408247	-2.14864	-0.418411	-0.107505	0.824078	-4.03782	0.984903	0.663627	-1.45457	-0.301659	-1.38433	-0.392928	0.806921
-0.32003	-1.3404	1.4493	-1.54646	1.16055	-2.04605	0	0.262812	-1.02355	-0.840341	-0.821529	-2.65998	-0.84211	-0.640704	0.434271	-0.47657	-0.990463	0.296735	-1.10498	-0.808902	0.29826	-0.0562588	-0.402647
-0.7465	1.24637	-1.93711	-1.21233	0.766287	-0.762733	10.2838	-1.05542	2.08712	-1.70217	-1.18246	-1.1907	-2.85938	-0.24387	0.407735	-0.159363	2.88302	-0.194609	0.738011	-0.406918	1.31494	1.78477	0.917964
-2.51697	0.523868	-0.982809	-0.734517	-0.766287	2.21208	-0.227531	-1.96435	-0.454431	0	-3.78527	-3.05099	-2.71976	-0.906155	0.639137	-1.12271	-2.1572	2.08886	-0.738011	0.406918	0.0163279	-1.95373	1.13573
1.41128	1.09359	3.15944	1.26975	0	0.388419	0	2.31739	0.65574	1.91292	3.95208	2.98173	2.35652	-1.4477	0.695931	0.963089	0.28666	-1.80331	-1.68071	-1.74096	0.0652848	2.1746	-1.99607
1.8825	-0.131218	-4.40169	3.57493	1.14724	0.119372	0	-1.3304	-0.554577	-0.633582	2.87494	4.59057	2.44441	-0.487263	0.521814	-2.91755	2.00012	-0.129838	2.23473	1.02776	-0.375971	2.39794	0.917438
0.391973	-0.201021	-6.72087	-1.4305	0	-0.209518	-1.60738	-0.896867	-2.09458	-3.22956	-0.915106	-1.11131	1.89946	-0.826798	0.362451	0.328408	0.548861	-1.16045	0.183993	-0.409837	0.685493	-1.02843	-1.20587
0.405478	-0.636648	-0.267738	-2.11208	-0.380953	0.119479	-1.39862	0.449439	-0.82945	0	0.428092	-0.530043	-1.12125	-0.366533	0.252936	1.62605	0.721832	-0.282165	2.3616	0.614127	0.130039	0.434311	0.17316
0.787413	1.3692	-1.07818	0.0646621	0	2.32939	0.468385	-1.17277	0.104058	-0.438597	0.365483	2.03103	1.60786	-0.531031	0.456074	0.803217	1.77426	-0.259221	0.537154	-1.74992	-0.651893	-0.0541859	0.230415
-5.53926	-3.01044	-0.54348	2.44246	0	-0.906667	-1.1751	-1.64688	-0.260349	0.875279	-5.49909	-4.93177	-4.32232	0.290646	0.608848	-1.12632	-1.82755	3.89486	-2.16615	2.46166	0.0326958	-2.24729	2.50013
-1.14624	-0.747043	0	-1.12601	0.76046	-0.886829	-1.66869	2.64012	2.37002	-1.31581	-1.94601	-1.76761	-2.04835	-0.753165	0.463101	0.484262	0.181073	0.738582	1.08894	-0.101368	-0.0981194	-0.444445	-0.393591
0.51628	2.84678	0	0.175285	-1.9121	0.886829	0	1.42732	1.46578	-0.886924	4.54575	1.55964	2.40976	0.327542	0.236658	0.321544	2.32978	-0.893968	2.49567	-1.12189	0	3.93064	0.617806
1.07369	1.92734	-4.17307	2.31342	1.9121	0	4.23593	-0.621948	4.99125	-2.25235	3.92769	1.74049	4.03024	0.425623	0.295038	0.640002	0.435708	0.875834	2.4349	2.23133	0.0654236	1.06497	3.25008
-1.95843	0.41741	-2.29895	0.310656	1.12996	4.14765	0.688866	3.07176	-3.15178	0.681047	-3.22082	-2.52776	-4.03024	1.782	0.20013	1.4252	0.201649	-0.174706	1.19557	0.200401	0.0326958	0.0529521	0.540542
0.812988	0.716903	-1.75958	-2.465	0.373832	0.586744	1.58914	-0.780915	0.7362	-3.68705	1.54181	1.63722	3.54396	0	-0.141226	-0.947874	1.22184	1.12156	1.51646	3.92592	0	5.40951	5.19939
0.990327	0.457632	0	0.760099	0	0	0	0	0.292969	0	0	0	0	0	0	-0.956945	-0.403917	1.12615	2.15062	2.56546	-0.0326958	2.23168	0
0.822881	-0.766402	-3.00323	0	-4.58095	2.74719	-5.08192	-5.09266	0.243487	0.701757	-4.7842	-6.80447	-4.63211	-0.222764	-0.543223	0.479617	-1.69469	-0.427231	-1.15228	-0.281823	0	-4.92562	1.47323
0.74107	-1.16836	-2.46926	0.377894	-0.39139	-0.206226	0	-0.64368	-0.977525	-0.936775	1.36028	3.05373	1.66369	0.250574	-0.73687	0	-1.39048	1.72438	-1.33335	0.656355	0.0163492	2.84428	1.65045
0.657816	-0.412939	0	0.0314268	1.1696	1.37792	-3.86522	-5.01287	-3.65132	-0.471699	-4.64497	-5.55209	-4.54957	-1.05525	-0.706294	-0.640002	-1.2441	-0.873951	1.99342	1.48426	0.0326904	-2.38167	-2.46058
-0.245331	1.27914	4.58095	-0.125766	0.386848	0.894728	0	3.15062	-0.715749	2.56724	0.331163	0.286555	-2.278	0.406647	-0.397232	-0.160643	0.528241	-0.0840547	-0.32949	-0.369004	0.0163412	1.32452	1.36331
0.187981	2.72395	-1.20122	1.07957	0.385357	-5.02855	0	-0.188147	3.23097	-0.925933	-1.42067	0.578145	1.60003	2.41942	-0.398816	-1.78431	0.663009	0.285792	2.44511	0.461043	-0.0653808	1.65625	2.5744
0.695592	-1.17749	0.902262	3.41142	3.40297	-0.677405	0	2.60238	-2.46429	2.29895	4.5666	3.00885	1.64921	-0.802281	-0.3761	-1.6502	2.52649	-1.26796	0.961546	0.458927	0	4.33474	-0.588237
0.692367	0.0893522	2.65895	3.18239	1.10907	2.18791	0	1.81823	-1.075	0	-4.2541	-2.7173	0	-0.365555	-0.365319	0.993386	1.39741	-0.161031	2.05216	-0.091617	1.3157	-1.34359	0
0.684153	2.20825	-1.17303	4.51483	1.0969	1.68228	0	-3.57672	1.78531	-0.913248	1.70151	1.95157	-4.48574	-0.596024	-0.734667	2.44113	0.0762176	-0.814331	0.778214	-0.551472	-0.274703	0.0965717	-0.19685
-2.55368	-1.64419	-0.888895	0	-1.0969	-0.22587	0	-0.749769	-2.50845	-2.32029	0.633397	1.51843	0.1554	-0.13216	-0.45575	-1.45752	-0.437771	-0.138503	0	0.643089	0.0161799	-0.775198	-0.7913
1.04945	-0.237107	1.18345	0.569327	-1.10907	0.392075	2.19254	0.469264	0.258866	1.39862	-1.53579	-2.59299	-1.40737	-1.45834	-0.668899	0.162999	0.437771	0.149786	-1.24807	-0.827591	-2.63928	2.54516	-0.497761
-2.64915	-0.490817	-3.89854	-0.221791	1.10907	-0.98694	0	-3.33206	-0.0517197	-2.81709	-1.31303	-0.772549	-0.790518	-0.169647	-0.698431	-0.817666	0.925207	0.0887118	1.7121	0.276625	0.0166099	0.142146	-0.249813
-0.613791	0.475979	-0.921666	-0.976162	-1.10907	-0.359206	-1.94653	-1.65938	-0.310881	-1.19762	0.714289	-0.906407	1.73096	-0.0495347	-0.968378	0.164069	-0.282216	-0.944525	0.154202	-1.76502	0	0.189215	-1.76638
-1.602	-0.401458	-1.24225	-1.41126	0.740744	-0.868565	-1.73486	0.392928	1.1865	0.95924	-2.24931	-0.664404	-1.81036	-0.745981	-0.952328	-3.16429	0.25705	0.325664	4.07604	2.04089	0.0498132	1.68701	0.355782
-0.700332	-2.4661	0.312013	1.01811	0.735297	0.384693	-0.752827	-2.48152	0.153728	1.89131	-1.25903	0.807277	-2.24909	-0.722852	-0.652802	-0.169348	-1.12378	-0.13771	1.17648	0.275103	0	-3.30687	-0.101523
-1.15448	-1.20599	0	-0.239454	0	3.18748	-1.77895	-2.33869	1.17079	0.932408	-2.35415	-0.814853	-1.5555	0	-0.954846	4.14997	-0.495013	-0.222097	-0.292826	-2.22231	2.60521	0.622458	0.101523
-0.0913815	0.769827	-0.625002	-0.608249	-1.47604	3.21947	-1.29034	1.02355	-1.63269	-4.99509	-0.567646	1.69763	0	-0.439118	-0.885538	0.809721	0.622197	0.203923	0.730463	1.76339	-0.958811	-1.20049	-0.101523
0.220469	-0.330299	1.24612	2.11982	-1.49816	-1.43895	0	1.51595	-1.86921	-1.47423	-0.618608	-1.92516	-1.32892	0.467846	-1.05195	1.12271	-1.60413	0.573903	1.01377	1.64237	0	0.0482975	1.71203
-0.133177	0.460583	-0.62112	0.194283	-1.13853	-5.41222	0	-0.805644	-1.15974	-2.25291	-1.8548	-1.45318	-1.4316	1.27717	-1.00971	0.635932	0.941002	0.729224	1.14614	3.3811	1.02348	3.23068	0.99355
-0.721415	2.23418	0.311042	-1.10129	0.380953	-2.70565	0	2.69343	1.36916	-0.507615	0.991904	1.86993	-0.169779	1.01574	-0.562401	-1.59748	0.622451	0.841129	0.709726	0	0.0161616	-0.609615	0.493098
2.43133	-0.978408	-2.83484	0	1.13423	3.45367	2.56424	-4.22173	-1.1044	-0.510205	-3.65281	-1.17129	-1.02477	1.7255	-0.998659	2.54386	-0.955674	0.0659486	1.96085	0.610556	-0.681047	0.982924	1.27079
-0.8922	-0.295399	-0.641028	0	-0.376648	-5.56125	-3.87145	-0.92832	1.20895	-0.770222	-1.3828	-0.714042	-1.209	0.103416	-1.33809	-0.314466	0.251302	1.28067	-0.138793	2.15062	1.64599	-0.0931967	0.484497
2.70639	-0.205019	0.641028	1.30903	-1.52094	1.13078	-1.59155	0.310399	-0.104548	2.04089	3.23814	3.3863	2.99552	0.103309	-0.745037	0.471328	-0.436334	-0.740644	-1.9636	-1.19864	-0.964948	0.0931967	-1.21567
-0.323632	0.273266	-1.28619	0	0	1.11914	-0.267738	0.103252	3.08984	-3.07717	2.7081	0.356904	1.17353	0.254374	-0.834381	0.780644	-0.919951	0.449152	0.705719	-0.345125	0.225989	-1.21838	0.0977995
0.601607	0.529222	1.28619	2.74289	-4.30595	4.79078	1.85928	2.34585	3.19388	3.58095	-0.214925	0.864655	0.0832986	0.267426	-0.841402	-0.624027	-0.745241	-1.76852	-1.70217	-0.955283	0.0322425	1.0319	-3.48121
-0.327012	-0.642992	0	0	-2.42927	-3.37442	0	1.00302	1.12333	0.250941	2.89807	-1.96923	1.56963	0.307682	-0.749173	-0.31348	0.422812	-0.293824	-0.57389	0.261438	-0.0483676	0.511986	0.303184
-1.0284	-0.0455443	-0.963089	0	-0.82305	3.91721	0.262812	0.298954	-0.584512	0	-0.652379	-1.41332	-1.07129	0.469948	-0.783424	0.31348	-0.632269	0.337115	-1.15776	-0.523561	0.0161251	0.0928074	0.100857
1.5737	-0.976585	0.322061	-3.81391	-0.82988	-1.19805	0	-0.598804	-3.47948	0.500001	-2.43713	-2.77839	0.660613	0.257872	-0.731973	-0.627946	0.980656	0.344163	6.07102	3.35515	0.0161225	0.739375	1.99607
-0.567359	-0.56897	-0.645164	-2.73601	-1.25788	1.4134	0	0.2	0	-1.50757	4.12913	4.93192	3.95372	0.182822	-0.911662	-1.26785	0.49191	0.583555	-2.9189	-1.44868	0	-1.15769	-0.59465
-0.250556	-0.510205	-0.324149	0.11491	-1.2739	-1.4134	-1.58733	-0.2	0.504542	1.00757	2.1824	1.16276	2.65433	0.0879061	-0.861382	0.952388	-1.89807	0.0635625	-2.13836	-1.64435	0.337974	-4.08802	0.19861
0.0993083	0.162621	1.29034	-2.05954	-0.858374	-0.0547995	0	2.56931	1.25033	0.749067	2.7721	2.10565	6.55973	0.727325	-1.89467	0	0.226108	-0.843636	-1.4514	-3.01174	0	1.9698	-1.39862
1.51592	-0.325506	0	-2.64306	2.13228	-1.65615	0	0	1.33302	-15.581	1.84207	1.50981	0.862074	-0.174614	0.372884	-1.43201	0.842077	0.446819	2.455	1.07336	0.0321285	-2.45618	0
0.501858	-1.37567	1.2739	-0.0903206	0.421053	-1.71388	0.531916	0.194932	-2.58335	15.8295	0.51403	2.19156	1.63182	-0.302939	0.223065	0.160128	-0.857836	-0.137327	-0.428878	-1.3435	0.0321182	-0.341881	-1.4695
1.44796	1.84035	0	0.48077	-0.843887	0.536646	0	0.291687	1.25033	0.247832	2.92622	2.51788	2.43321	-0.168697	-0.148655	-0.964638	0.711896	0.265577	0.428878	1.16541	0.0642055	1.26399	0.864046
-0.78282	0.0540728	0.315956	0.254472	-0.424629	1.53833	-0.798939	-0.975617	-0.798407	0	0.579232	1.3927	-0.827591	0	-0.297974	-0.811034	-0.151377	-0.32502	1.41645	-1.43629	1.30721	0.0482975	-1.94181
-3.08505	2.41858	0.628933	-1.43042	2.10534	-0.696043	0	1.1696	2.91307	-2.5064	-3.52681	-1.78642	-2.02875	-0.155453	-0.0895656	-1.14661	-1.09779	-0.499977	-0.564176	0.361011	-0.0158391	-0.872944	-2.13828
1.10993	0.391213	-1.26185	0.484116	-1.25788	4.18539	0	-0.0969462	1.25727	-2.05135	1.56883	-3.75625	0.704228	-0.0744325	0.0447928	0.656817	-0.86994	0.073178	-1.71188	-0.180343	0.0158391	0	-0.369686
-0.00818629	-1.6657	-0.317965	0.436715	0	0.58814	-0.267738	-0.876771	-2.13704	1.03094	-2.66455	-1.40817	-0.492439	0	0.0746102	-1.31798	-1.66536	-0.91483	-0.432589	-1.63789	0	-2.66551	-1.70762
0.0671078	-0.259919	-1.92932	-0.920831	-3.43381	-1.31424	0	-2.87861	1.41362	-0.51414	1.45831	1.28804	1.4701	-0.298285	-0.209049	-0.165975	0.0433276	-0.333515	-1.01671	-1.47877	0.0633312	-1.51213	-0.215517
-0.481883	0.709358	-2.29895	0.469023	4.27415	0.215829	-2.71756	-0.910477	0.338246	-4.75023	1.41636	0.507794	-0.837409	-2.0509	-0.434425	-0.332779	-0.292826	0.827963	0.727276	0.27894	0.0158265	-0.356144	0.966191
-2.43173	0.349014	-1.67508	-0.0452933	-1.6878	1.84198	-0.82988	-0.305344	0.289018	-3.297	-1.41636	-1.86749	-1.19846	-0.0831947	-0.406168	0	0	-0.877103	0	0	0	0	0.32
-1.31758	-0.0303007	-2.39328	-1.49098	-2.58635	0.0259902	-1.11733	-1.33404	-0.675678	-2.25998	-1.39353	-1.6914	-0.783201	-0.326514	-0.468385	-3.56272	-0.184813	-0.32645	0	-0.932843	-0.0316556	0.203666	-0.801929
0.392849	0.78485	-0.346621	-1.12525	-0.437637	-2.70644	-1.69976	-0.934101	-2.10431	-0.573067	-3.60479	-2.6818	-4.90761	-0.467307	0	2.38919	0.233677	-0.775316	-2.34615	-1.60608	-0.0316656	-0.663437	0.481929
-0.414359	1.88397	4.74665	-0.934441	-0.881063	4.55747	-0.573067	-4.0431	-1.94763	9.32181	-3.43802	2.57969	-1.36057	-0.30808	-1.17299	-2.90867	0.308918	0.365559	-1.19404	-0.668899	-0.237812	1.47398	0.63898
0.33952	0.749618	0	4.13789	2.18827	-3.34618	-0.57637	0.75717	2.8339	1.04168	2.78684	0.676342	0.682597	0	-0.568576	-0.696867	-0.0757863	0.443133	0.598804	0.859194	0	1.50228	2.15288
0.24472	0.0439207	0	-0.526832	0	0	0	0	0.195886	0	0	0	0	-2.72256	0	-2.12022	-0.113787	0.61394	0.891536	1.22817	-0.732837	0.0993542	0
0.470082	1.04835	0.988476	0	-1.30721	2.7403	0	5.14549	0.146663	-0.259404	1.03094	0.303952	0.226501	-0.346496	-0.587328	0.711747	-0.179071	1.05497	1.90482	2.04468	0.0319744	0.396433	2.91805
-0.631122	0.872486	1.62605	2.28283	-1.76996	-0.380201	0.2886	1.6244	0.390054	1.0336	1.37292	2.20826	1.12487	0	-0.544029	0	0.62265	0.31277	1.29778	0.915757	0.0319642	0.98426	-0.151477
-0.727221	0.157819	1.91699	0.705574	0.445435	2.24902	1.14614	-0.403633	-0.146092	1.02303	4.641	3.32959	3.58881	0	0.0623247	0.177148	0.317948	-0.0446216	-0.574714	-0.823803	0.0638978	1.31357	-0.455812
-3.93042	-1.75716	0	-0.293384	1.32452	0.693018	0	0.101061	-0.97944	-0.766287	-3.74335	-2.70249	-3.88754	0	-0.202698	2.10165	-0.691073	-0.776622	-2.33247	-1.38827	-0.319898	0.241371	-1.48302
1.20391	0.0218826	-0.316957	-0.604142	-0.439561	-2.56184	-0.285307	-2.35064	0.881926	1.2739	0.868061	1.06893	0.522194	-2.83837	-0.187471	1.03449	0.308333	-0.704909	-1.93602	-2.83573	0	-2.83638	-2.98061
-0.375904	-0.629209	-1.60003	-2.78753	-0.884962	2.23072	-1.43887	-2.19559	0.583659	-1.78804	-3.00494	-3.20581	-0.746829	-0.0446462	-0.187823	-0.515908	0.0971712	0.0286844	-1.2103	0.287219	0.0160192	-2.20671	0.582166
0.922774	-0.154247	0.322061	0.364078	-0.445435	-0.836237	-1.45988	-0.423729	-1.17075	0.51414	-2.91447	-0.770758	-2.8128	-0.64962	-0.376707	0.172265	2.5833	-0.113276	-0.610689	-1.34747	0.0160167	-0.203046	0.578797
0.760558	-0.110323	-0.969313	1.26393	0.445435	-0.486588	0.293686	0.529382	1.89556	-0.772205	0.525896	3.45401	2.06036	0	-0.852816	1.19762	0.210106	-0.270114	0.458366	-0.0969462	0.064041	-1.27846	0.261986
-1.05995	-0.213636	1.61034	0.417786	-0.892863	0.918632	0.584797	1.36342	5.52575	0.515465	-1.86448	7.88867	-0.0755572	0.485746	-1.35731	0.169924	0.146812	-0.658282	0	-1.86006	0.0160038	0.102881	-1.68869
1.75855	2.04387	-0.641028	-1.00263	1.33632	0.923647	0.870833	0.208117	1.35749	0.25674	0.694608	-3.15446	0.452489	0.305185	-0.95308	-0.340136	-0.383213	0.166881	3.74015	0.885397	0	4.27738	2.47056
-0.283629	1.45611	1.27797	0.82379	-1.33632	2.37136	-0.579712	1.85381	0.0449337	0.51151	1.16987	-6.35396	0.150376	0	-1.06063	0.340136	0.336047	0.144557	0.146735	0.0978953	-0.320564	1.56406	-0.0519346
0.285009	0.893243	-0.317965	3.14223	0.892863	-2.5463	0	-2.16615	0.269179	0.508907	3.31943	2.21178	2.52239	0	-0.790518	0.676822	-0.620467	0.801909	0.875918	2.03397	-0.305491	0.387222	2.56424
1.57578	-0.0141163	-0.960007	1.30683	0.44346	2.08193	-1.1696	0.208333	-0.314113	-0.508907	1.68439	-0.417537	0.802631	1.1454	-0.997017	-0.168776	1.98967	1.02273	1.29966	1.52239	0.674052	2.95119	1.50757
-2.36543	-2.27023	-0.322061	0.185304	0.441502	-0.750856	0	-2.52911	0.179614	-0.255428	-3.84748	-1.1573	-2.80048	0.761239	-1.59923	-3.61174	-0.0413736	0.0134366	0	-0.37843	0	0	-1.25472
-0.250316	0.410737	-2.28395	-2.1011	0	0.651067	-2.38106	-1.72232	1.73453	-2.3287	2.75696	0.0564215	1.77782	-0.24092	-1.22931	1.04531	-0.284908	0.110411	-0.864559	-1.81736	-0.0319949	-1.22701	-1.21953
0.737311	0.473493	0.657897	0.0145423	-1.77782	1.21517	-0.907722	0.54142	1.48799	2.07261	-2.10534	2.45155	-2.22726	-0.0950675	-1.00139	-1.39618	-1.05341	-1.05235	0	-0.289995	0.0159987	0.945187	-2.4846
-1.32535	-0.200602	-1.32015	0	3.09075	-0.17319	0.606062	-1.52342	1.209	-0.25674	5.27815	5.00507	5.40672	-1.32569	0	-0.70547	0.674001	-0.550812	1.43681	-1.46273	0.0159962	0.609615	0.0523972
-2.79974	-0.604231	0	-1.99742	1.72418	-0.892338	0	0.764613	-1.90647	-1.29368	1.37147	0.130796	2.52822	-0.69189	-1.45069	0.529569	0.503832	-0.186557	1.13476	0.294262	0.35127	-2.46108	0.261575
0.884931	0.064914	2.6231	-1.11883	2.94758	1.18831	-0.302572	0.434311	-1.32102	1.03628	0	-2.1269	1.24054	0	-1.48992	-2.13531	0.47037	0.311492	1.81696	1.26522	0.0159375	1.33272	1.03951
0.376007	-1.83371	2.87101	0.493828	2.86318	-4.04361	-0.30349	1.82506	-2.37733	-1.8206	2.23797	0.824418	1.56306	-1.99057	-0.861455	-1.99825	-0.984617	-0.742052	0	-2.05186	-0.0159375	-2.15062	-2.03716
0.265989	-0.088164	0.626961	0.461688	3.95308	2.43116	3.28879	-0.96206	1.75483	-5.39214	-0.266749	1.55052	-1.22118	0	-1.14204	2.35732	-0.312957	-2.17482	-2.38273	-1.49182	0.0318725	-2.64333	-4.69976
0.676003	0.900017	0	1.41637	-0.778214	-0.526539	11.6475	-0.754721	2.07467	2.4625	2.19476	-0.989296	1.49054	-0.54983	0	0.357782	-0.151614	-1.08099	-3.17029	-1.51442	0	0	-2.40706
-1.52265	-0.900017	-2.21178	-2.26693	1.16506	-0.630554	-12.8309	0.108167	-2.6562	-2.4625	1.3774	-1.7736	3.30718	-0.591377	-2.08168	0.356507	-0.85648	-1.45015	-2.37048	-1.0225	0.0637146	1.72121	-1.71433
-0.594857	0.870875	-0.32	-0.345268	1.5326	-0.889688	-0.896867	0	1.46963	1.37554	-1.35731	-1.26797	-1.77228	-2.23556	-1.36822	0.532388	0.437038	0.153306	1.04401	0.205339	0	-0.537767	-0.694046
-3.55803	2.2123	0	-0.769873	0	1.92112	0	0	-1.11137	0	0	0	0	0.298883	-0.26455	-2.69075	1.48112	0.513297	-1.04401	-0.823898	-0.0318522	3.08905	2.5782
-0.0563893	-0.772702	2.84379	0	1.13423	-0.703262	0	-0.21645	0.579453	4.27873	1.91089	1.88932	-0.0662471	0	-0.113593	-0.546948	-0.784766	-0.244781	-1.5106	-0.935072	0	-0.907144	-0.795007
-0.977848	0.480064	-2.52379	0	2.96318	-0.556753	-0.904984	-0.979866	-0.267023	0	-1.15012	-1.4829	-1.26711	-1.53533	0	-0.182983	-0.00521771	-0.384272	-0.917438	-1.15487	0.0318522	1.33399	-0.514434
1.274	0.491997	3.45403	2.86801	-0.365631	-3.61474	0	0.979866	-0.76046	3.09303	0.656001	2.70097	0.535477	-1.52687	-0.474699	-2.22231	-2.1039	0.466198	-1.70415	-1.27526	0.063674	-1.28604	0.0572902
0.375087	1.0472	2.43915	0.250019	-0.735297	-1.37672	1.20483	0.755535	-0.134801	2.75362	-0.238048	1.41123	-0.535477	-1.27951	-0.457841	0.187091	-0.775675	-0.343261	0.312013	-0.214133	0.0318218	0.52594	-0.344234
-0.937185	0.952722	0.300752	1.83385	1.10093	0.478095	-0.600602	1.91699	0.939814	0.738011	-0.757579	-0.136333	-0.876312	-1.01398	0.114657	1.11525	-0.037599	0.255766	-0.155885	-0.107239	-2.59462	-1.87731	0.172265
0.0831131	1.2747	0	0.732815	0.364299	0.661073	2.08651	-0.847463	-0.535955	-0.98523	0.658225	0.194704	1.01045	-0.0911842	0.400267	0.184672	0.134217	0.403431	-0.3125	0.854706	1.28155	1.15943	1.42412
0.548235	-0.531457	1.49034	-0.0429584	1.44407	2.8068	-0.591718	0.847463	-0.269058	0	2.53228	0.626961	0.734561	-0.507172	0.171054	-0.555043	-0.209458	0.821666	-0.156617	0.21254	-0.322893	-0.965258	0.0565451
-0.251166	-0.861835	-2.09275	-0.0429769	1.77625	-0.384954	0	-0.422834	-1.35626	-0.496279	-2.5124	-0.932166	-1.47456	0.573496	-0.323348	1.47332	-0.377054	-0.44433	-0.628933	-0.745875	-0.616385	-1.7613	-0.908581
0.003358	0.508269	0.301659	-1.80732	0.701757	2.18888	-1.19404	0.73879	0.363472	-0.498754	0.594532	2.34609	1.00773	-0.982768	-1.22677	2.52721	-0.394734	-0.0363269	-2.39437	-0.859296	0.33786	-1.69242	-0.514728
-0.36182	0.63	-1.82376	-0.776276	2.41808	3.19517	0	0.837701	1.97582	-3.04592	-0.853264	-2.23559	0.200334	0.167252	-0.347759	1.59155	0.0974765	-0.352899	1.44349	2.13455	-0.0129735	1.44533	0.799547
0.63456	2.60887	0.916037	-0.412554	-1.72121	0.389541	0	0.104221	-1.07288	0.2574	-1.46545	0.136333	-1.61402	0.225348	0.0580439	0.524936	2.21613	0.864993	1.26584	1.15487	0.323834	1.18054	1.01868
0.769488	0.0268908	1.50832	-0.354977	-0.347826	0.821925	3.24992	2.06193	-0.812279	2.78852	-1.42569	-0.546449	-0.135685	0.788877	0.289715	0	0.222105	-0.31246	-0.78927	0.312663	-1.00732	0.341714	-0.508045
-0.99411	0.375713	1.19049	0	1.03987	1.97932	0	0.407333	-0.317677	0.747201	1.95009	-0.0652529	1.01318	0.774495	-0.19305	1.04168	1.02479	-0.00867149	-2.24368	0.932166	1.33011	0.96994	-0.169924
0.51072	0.447667	-0.891536	1.13445	5.69668	0.658574	-0.583092	-1.32994	-1.88122	-1.75224	-2.01165	-0.556375	-1.3532	2.29615	-1.02944	-0.519482	1.04027	0.122907	-0.162206	0.205973	1.28084	0.673403	0.169924
-0.112856	-0.487855	0	0	-2.64042	0.234451	-0.586512	0	-2.39055	0	-3.95656	-1.7013	-3.96023	0.392267	-0.332454	-1.22272	0.196433	0.302684	-0.651468	0.410678	-0.0318218	0.43052	0.901415
-0.999335	-1.33533	-1.80728	2.43138	-1.00841	4.57481	-1.78046	-1.76628	-1.52967	2.9853	-0.363676	1.5765	1.82589	0.199545	0.449527	1.39618	1.36943	1.16442	3.05736	1.92802	-0.318776	-0.670501	3.03807
0.477955	0.575434	-0.609758	-3.38818	-0.33841	0.644699	-0.29985	-0.84211	1.76658	-1.48151	-2.91388	3.73459	-0.698327	0.445541	0.292085	0.17316	-0.0305686	1.24225	0.631914	-0.100553	-0.319796	-0.82027	1.56548
-0.17602	0.987414	1.21582	0.206856	1.68071	-3.9499	0	0.211193	-0.807797	0.990107	-1.46702	-2.18256	-4.00339	0.047619	-0.663288	-0.868815	0.827143	-0.475491	-1.26785	-0.808085	0.0480346	1.53849	-2.05635
-3.20784	2.50822	0	-0.607005	-1.00503	0.703357	0.896867	0.210748	0.949675	0.491401	-1.3299	-3.07514	-1.46953	0.340608	-1.24078	-2.29489	0.614642	0.391925	-0.319489	1.70944	0.0160064	-0.191022	0.708257
-3.5552	1.36603	-0.910477	0.798703	2.00007	1.198	0	1.35914	2.15062	0.244798	1.8213	-1.22866	0.884309	0	-0.636185	-0.357782	2.03343	-1.77355	1.11377	-0.800805	-0.0480269	6.20857	-1.69728
0.461185	-3.68726	3.00323	-0.0884304	0	-2.95592	0	1.64782	-1.49117	1.21508	0.178094	0.444865	-0.958356	-0.17412	-0.680411	0.536194	2.69959	0.0148322	3.72714	0.800805	0.335705	1.16125	1.58864
-0.348787	1.10799	-4.23024	0.367945	-0.662254	0.104074	0	-2.06406	0.934586	-1.45988	0.532388	-0.600359	0.811513	-0.198232	-0.503272	0.355872	3.39558	0.607786	3.00323	1.09074	-0.255673	2.7591	1.61729
-0.130409	-3.42292	0.615387	-0.485974	-1.00168	0.318922	0	0.934101	-2.25786	-0.491401	-1.29149	-2.25113	-1.55501	-0.278186	-0.708864	1.58594	3.43182	-1.84167	2.04985	-3.00323	0	-0.302834	-0.75148
0.907724	-0.946704	0	0	0	-2.23241	0	0	0	0	-2.79532	-2.89244	-2.0355	-0.207155	-1.51549	0.34904	-0.840209	-2.95786	-0.727276	-1.02146	1.28767	-2.9013	-4.68793
-2.41775	0.837399	-1.85764	1.27614	-0.673403	-2.79891	0	-1.7718	-0.572521	-2.49389	-0.230734	-1.36984	-0.687813	0.453588	-0.165221	0	0.211841	-1.05315	-0.292398	-3.97958	-1.38372	0.445039	-4.91855
-0.791089	0.762635	1.24225	-0.731425	2.33734	0.929794	0	0.941922	-1.78619	1.50379	5.76716	0.841338	4.35177	-0.0317637	-0.144793	0.521287	-0.406046	0.791509	3.59492	-0.321028	-0.965569	0.310353	1.17926
0.701646	-0.190114	-1.24225	2.57985	1.6367	-0.109791	0	-0.208551	-3.51957	-0.498754	-0.656314	-1.53699	-1.55386	0.420052	-0.518835	1.03449	-1.92621	0.0505875	1.12361	0.427808	-1.1057	0.309393	-0.587891
0.0199284	-0.238152	1.55042	1.30777	0.324149	1.17504	0	0.416667	-0.75969	1.48886	-0.417904	1.25015	1.62725	0.44192	-0.145757	0.342466	1.11369	0.17034	0.27894	-0.213675	0.0653808	-0.753049	-0.117994
-0.131438	-0.676717	1.22326	1.16533	0.323102	0.347824	-0.597017	0.311365	-0.40754	1.22401	0.702836	0.0287212	1.38436	0.173078	-0.564206	0.681434	-1.3444	-1.68099	0	-1.29173	1.29872	-3.62194	-2.0275
0.303308	-0.598495	0	-0.223589	-0.647251	0.1609	0.298954	0	0.914641	0.485438	3.84291	4.3343	5.14742	0.259057	-0.483143	1.01352	2.40074	0.531903	1.6575	0.64795	-0.809721	4.99092	-0.0602591
0.395841	-0.26254	1.80728	-0.125989	-2.63173	-0.814698	0.298063	3.66267	-2.61352	-0.729043	1.23497	0.2609	-0.206398	0.352182	0.0631512	0.167926	0.960467	-0.353185	2.16811	1.17711	1.64493	-0.263505	0.421053
-0.131908	-2.28817	0	-0.252455	-1.00503	0.766957	0	0.398804	-0.991399	-1.22701	-2.84859	1.40262	-1.03843	0	0.775604	0.335009	2.25245	-1.86739	-2.85539	-1.82506	0.955117	2.00268	-1.75602
0	-0.297725	0	-0.80367	0	0	0	0	0.470835	0	0	0	0	-0.140724	0	0.33389	2.22846	-0.106179	1.0974	-0.979866	-0.571975	-0.172563	0
-0.919679	-1.03473	0	0	-1.69783	1.46862	0	0	0.468629	0	0	0	0	1.18989	0.354352	1.15991	0.187745	-0.128239	-0.547197	-0.879127	-0.928452	-0.172861	0.912138
-0.704508	1.21205	-0.598804	-0.496702	-2.77796	-0.708333	0.888895	2.16544	0.466443	-3.26252	-2.29497	-1.0467	-0.558271	0.63962	-0.0624415	0	0.0213124	0.617743	2.70653	0.550359	0.609269	0.60371	0.422834
0.463123	-1.83085	-3.35909	0.976861	0	0.448779	0	-1.37257	-1.30109	-2.06193	-0.813638	-1.75068	-2.55152	-0.771133	0.394806	-1.82881	-3.04201	-0.503839	1.58944	0.656457	0	-4.84463	0.0602591
-1.055	-1.11774	0	-1.03378	-3.58461	1.10216	0	-0.992072	0.834642	-0.784318	8.70666	6.56591	4.97127	1.02431	1.19564	1.82881	2.14295	-1.02728	1.17572	0.32662	-0.320205	1.52264	-0.543644
0.792904	-3.06075	-1.56498	0.383605	0	2.07638	0	0.199203	-1.99377	-1.05542	3.32402	4.07022	5.3204	0.405277	1.46463	0.164609	-0.435299	-0.501357	-0.390371	-1.53344	0.0641231	-0.356189	0
-0.351763	0.660068	1.56498	-0.797271	0.364299	-0.61848	0	-0.298954	-1.11912	2.35922	1.20648	0.399302	0.838444	0.152509	2.07841	-3.17487	-0.519662	0.606945	-3.17908	1.31581	0.0320461	2.16201	1.38348
-1.14153	-0.164609	5.14486	0.142837	2.86758	-0.206743	0	1.38753	-0.915215	1.03094	0.0386772	-0.0872111	-1.74932	-0.129618	0.925295	0.169635	3.19603	-0.95089	-1.49155	1.29872	-0.61064	1.60211	-0.059755
-0.910839	-1.02364	0.294551	-0.028551	-0.709223	-1.2749	0	0.490919	2.61557	-0.25674	-1.49998	-1.2795	-1.05126	0.251457	1.7868	0.169348	-1.17168	0.629523	2.02847	1.17586	0.0322321	-0.258065	0.417537
-1.36729	-0.477762	-0.589972	0.526879	2.11275	-1.5272	0	0.0978953	0.630254	-1.55444	-2.18263	-1.25133	-1.19603	-0.251457	2.32126	0.842465	-1.65598	0.486337	-1.75562	0.318303	-1.91969	-1.73766	2.41117
-2.3391	-0.426602	-1.19049	-0.284455	1.38411	-0.498417	0	-1.6774	-0.841225	1.81117	1.96649	-0.211153	0.466823	-0.320954	2.15822	-0.167926	0.0346006	-0.546976	-1.23374	-0.424629	2.33777	-2.70947	-0.758242
-3.76063	-1.03596	1.78046	0.383823	0.684934	-0.118719	0	0.694103	-1.00823	2.28147	1.30925	-0.160262	0.398407	-0.47568	2.16668	-0.674539	0.702392	-0.653121	2.58694	-1.60861	0.32041	3.23395	-0.646111
2.47587	0.997782	0	-1.04116	2.36099	-4.13488	0	-0.59465	0.10661	0	2.35982	2.48381	2.61624	0.0845601	1.05707	3.16429	-1.22701	-0.291076	-1.2851	-0.21645	0	-1.49322	1.28807
1.98259	1.05596	0	1.21127	1.65293	-0.948713	0	0	-2.59054	0.500001	0.472904	0.349847	1.21914	-0.161495	1.62634	0.978801	-1.28628	0.0198338	-0.204429	1.18472	0.0319846	0.793305	-1.81983
1.16633	0.737844	0.878483	0.550888	0.978801	-0.150623	0	-0.698257	-2.7156	0.745345	-3.80815	-0.839183	-1.86681	0.460724	0.97715	0.485831	0.671453	0.316807	0	0.852884	0.0319744	0.263043	1.93611
-3.14714	-0.594367	-1.46846	-0.565053	-0.978801	-3.00659	0	0.698257	2.77026	-0.496279	-0.215877	0.57066	-0.0649984	0.435731	0.208153	-0.485831	0.135498	-3.22393	-0.821922	-3.01747	0.0798914	-1.05635	-7.72865
0.768697	0.0678912	-0.296297	0.297051	-1.65293	-0.467101	0	0.792083	-1.4864	-1.25158	2.00337	1.47112	1.7403	0.441435	0.587424	0.324149	-1.65155	0.446398	-5.51376	-1.10012	0.0159706	-1.15711	1.80409
1.41221	1.63797	0	-1.15066	-0.33389	2.03268	0	0	0.0554477	-1.52287	0.384394	-0.0616371	-1.15683	0.204833	0.154919	0.966191	-2.57745	0.713276	-1.02265	2.29644	-1.31814	-2.63054	-0.991334
-1.41924	-0.0964857	-1.79646	-2.13727	0.666669	1.13996	-7.34275	-3.10491	0.055417	-0.512822	0.172496	2.20741	0.900907	0.0681844	0.0687758	0.32	0.0364465	-1.07538	-2.37753	-1.85494	0	0.41275	-0.875553
0.409491	0.274369	-0.910477	-0.233816	-0.666669	-1.88139	0	0.304723	-0.277393	-0.774197	-1.50495	0	-2.46446	0	0	0.31898	0.222945	0.388611	-0.906351	0.439561	0	-0.873368	0.250941
-3.31076	-2.90768	0	1.13472	-0.335009	-1.49956	0	-1.22451	-0.33389	-0.780238	1.04429	0.108499	0.98008	-0.00757375	0	0.47657	0.0590654	0.0565281	-0.60883	-0.660068	0.064704	-0.92765	-0.250941
1.68974	-0.996024	0	-0.246216	-1.69209	0	0	-0.514669	0.111421	-0.786374	0.0576979	0.869753	2.18658	0.279847	-0.0687758	0.158353	-0.8805	0.0882613	0	0	0	-3.02767	-0.946678
0	-0.4244	0	-0.334084	0	0	0	0	0	0	0	0	0	0	-0.327333	0	0	0	0	0	0	0	0
-0.315884	-0.90885	3.00323	0	0.340716	-1.38969	4.0441	2.54726	1.82074	4.1243	1.54539	2.18569	2.13979	-0.030216	0	0	0	0.284553	0	0	0	0	0.820971
-1.33862	-0.414435	-1.79109	-0.131033	3.34479	-0.982246	2.70693	-0.808085	2.27037	-1.78349	2.22793	1.6171	0.806206	0.512435	0.0517554	0.158103	1.38341	0.20213	3.00775	-0.775627	-0.0323468	-3.02315	0.876649
-1.8124	1.53957	0.600602	0	-0.32949	1.61363	0	-0.203046	2.42884	1.02303	-0.389575	-0.611305	-0.868492	0.0976673	-0.380163	0.315458	-1.12256	0.66153	-0.743498	-0.111297	0.0323468	0.197824	1.23917
-1.21638	1.01337	0.894194	0.884769	-0.330579	1.74299	0	-0.713925	0.156372	1.26424	-0.09298	-0.417368	0.435189	0	-0.503342	0.314466	0.964257	0.946155	0	0	0	-0.993057	-1.17685
0	0.33552	0	0.158719	0	0	-0.894194	0	0	0	0	0	0	-0.0150195	0	0	0	0	0	0	0	0	0
1.33955	-0.488401	1.17995	0	0.660068	0.236986	2.36697	-0.925456	4.43159	0.250941	-2.62007	-2.34503	-1.31129	0.389776	0.191221	-1.42295	-0.663066	-0.119295	5.23375	3.39387	-0.323939	-1.10387	2.64387
2.75968	2.71674	1.16619	1.75782	2.27652	-0.35025	-0.292826	2.04506	1.4346	2.96318	1.70426	0.911627	0.313775	0	0.0520879	-1.12091	2.56413	0.7291	4.43286	2.02458	0.0324412	3.08022	-0.060698
0.311386	0.822989	0.289436	3.19258	0.641028	-1.98699	1.74423	-0.202634	0.147239	1.68882	0.953011	-0.123824	0.500001	-0.269683	0.138768	1.12091	-1.22438	1.61749	0	1.9844	0.0648508	0.731176	1.14701
0.614124	-0.46627	-0.870833	0	-0.32	-4.00212	-4.11823	-1.84243	-0.147239	-0.479617	0.389792	-0.912761	0.0623247	-0.150139	2.00779	-1.12091	0.157236	-0.781204	0.944039	-0.830742	0.0324097	-0.486856	-1.08631
-3.3381	0.46627	0.291121	-0.923571	-2.92704	-2.1188	0	1.12996	-0.937584	0.956945	-3.83319	-3.91612	-4.32913	-0.293421	1.24938	-0.322581	0.0134659	0.466403	1.99342	1.75715	0.32352	1.4054	1.26622
0.983363	1.78563	-0.875918	-1.39453	-0.662254	1.72626	0	0.915106	0.346449	0	-2.19917	-2.36204	-1.70608	-0.309399	1.79586	2.86644	2.9367	0.695972	-0.131666	-0.30785	2.5669	2.14243	1.30954
-3.14221	1.1108	-0.293686	0.392432	0.331675	0.461823	0	-0.304106	0.345253	-2.16615	2.66009	3.61729	3.2555	0.218942	1.90979	1.24807	-0.809579	-0.705296	-1.45988	0.410257	-0.615775	-4.18431	-1.60957
3.96507	0.150521	0.293686	0	1.64207	0.247867	0	2.80299	0.784702	1.92777	1.55897	1.41467	1.27309	-0.430791	0	-2.03609	2.15595	2.00564	1.32804	0.408581	0.694447	0.928875	1.01645
-0.587905	-0.121833	0.292826	-0.80051	1.29452	-0.814113	0	0.492369	-0.784702	0.238379	-1.23376	-0.277711	-1.20905	0	3.57323	0.944889	1.19685	-0.736318	-1.59578	-1.0246	0.611527	1.68882	-0.297885
0	0.257824	0	-0.0705268	0	0	0	0	0.442153	0	0	0	0	0.40062	1.14783	0.625002	-0.686438	0.639065	-0.134138	1.32994	-0.328819	-1.83491	0
1.33715	0.641668	2.02612	0	2.22585	-5.32034	0	2.23419	0.440206	1.88685	0.171739	-0.612476	-0.320616	0	1.78835	0.466201	-1.93963	1.06215	1.86176	0.40568	-0.929653	-0.97944	2.00834
-0.278351	-0.192068	-0.286944	-0.254309	1.86921	-2.26697	0	0.38351	1.06797	-0.703403	-2.56845	-3.11367	-2.27356	-0.23413	1.02488	0.772205	0.161266	0.0148101	-2.13057	-2.04506	0.015829	0.147529	0.989243
-2.41315	0.596339	0.286944	0.296631	2.43915	-0.974267	0	-0.38351	-3.03945	-2.62232	0.526779	-0.907722	-0.394997	0.775811	0.478685	0.918843	-0.471452	-1.1535	1.07096	-1.24742	0.363378	-2.48769	-2.28414
-0.691271	1.12614	0.57143	0.436282	-1.21214	-1.0094	0	-0.2886	0.0995025	0.961546	1.81262	1.68905	1.63563	0.134963	0.0298418	-1.84621	0.288374	0.0441003	1.32277	0.72955	1.56473	-2.29309	0.767192
1.30448	1.15512	0	0.350459	0	-2.36659	0	-0.968062	2.01828	1.66077	0.837303	-0.386775	-0.781763	-0.134963	0.253297	0.464757	0.756295	1.18424	3.35949	1.8519	-0.638582	0.10304	1.05264
1.2535	-1.51972	-1.72418	2.15955	-0.918843	1.23498	0	0.097229	0	-1.42182	-0.741801	-0.382003	0.521854	0.0300075	0.785597	0.769827	2.6071	-0.260123	-0.254453	0.50839	0.0156238	0.92261	0
-0.0067482	0.448557	0.865806	-1.43451	-2.49234	0.397572	9.99404	-0.389484	-1.12719	-0.718566	-0.459243	-2.67056	-1.24388	-0.526436	0.559483	-1.07942	-0.0633005	-1.31838	-2.97372	0.707431	0.311964	-1.02565	-1.17029
-2.41379	-1.06156	-0.57637	0.40208	0.941922	-1.29087	0.271371	-0.587086	-0.0986193	0.718566	2.08776	1.15327	1.56866	-0.688536	0.278572	-0.310559	-1.43282	-0.85638	-6.08707	-2.13749	-0.109077	-3.03529	-1.60193
-1.74156	0.823513	-0.289436	0.40047	0	5.00857	0	0	-0.0493462	-0.95924	-0.112761	-0.88298	-1.50281	-0.387966	0.204768	-0.780644	0.776355	0.135529	0.69493	-0.72277	0.0155897	0.68838	2.07169
-0.947128	-0.611709	0	0.659343	0.933133	2.26891	0	0	0.0493462	-1.21214	-1.03961	-1.83551	-0.859509	-0.696014	0.248085	-1.73917	-1.23991	0.624758	1.10194	1.44035	-0.923975	2.14052	0.350878
0.802577	-1.22048	-0.581397	-1.19828	-2.82593	-2.47578	0	-2.38343	0.492127	1.45281	0.227747	1.78408	0.529803	-0.438445	0.668219	-0.640002	3.1048	1.27095	3.49968	1.21829	0.0314614	2.8013	2.36527
0.585361	1.43184	2.30558	0.882886	0	-1.00731	0	1.09946	1.36521	3.54228	2.15667	3.13327	3.50458	-0.773878	0.807503	-0.321544	-0.976517	-0.709907	0.39604	0.302267	0	2.92028	-0.457144
-0.936816	-2.32825	-0.285307	1.36409	2.20481	-2.87095	0	0	-1.02216	0.693644	-0.651468	-2.39015	0.445435	-0.412596	0.957629	0.642057	-1.10957	1.16862	1.0485	1.00101	0.0471735	1.40472	0.51414
-0.599895	0.0144061	-0.573067	0.365137	1.23841	0.245103	0	-0.999009	2.0819	-0.925933	0.484353	-0.396496	-0.190658	-0.909026	0.92036	0.955421	-1.83515	0.0747424	-2.64216	-1.20242	0.0157196	-1.64892	-0.22818
-1.2179	-1.04258	-0.28777	-0.487146	1.22326	-0.922252	0	0.999009	0.239292	-1.6413	-1.49787	-3.43524	-2.7081	0.0236137	0.70225	-0.47657	1.24145	0.893392	2.77245	1.99607	0.0157171	2.17663	0.853005
-1.81723	-0.818479	1.43064	-0.762531	0.606062	2.16853	0	0.693415	-1.73582	1.6413	-1.55897	-1.69881	0.195886	0.172997	1.03036	0.634923	-0.968562	0.414957	0	-0.495296	0.611048	-0.913248	0.451978
-0.532211	-0.39703	0.566574	-0.520763	-0.910477	1.55825	0	1.56712	0.38835	0.464038	0.3443	4.18764	0.909097	0.649989	0.841442	-0.475814	1.68994	0.580157	0.130124	0.889774	0.0156189	1.34295	0.506045
-0.561244	1.22279	-0.851069	0.151026	-1.22701	0.355373	-1.08993	-1.07475	-0.437	2.51442	1.17693	1.18961	0.322685	0.0468238	0.97055	-0.798089	-1.18512	-0.514539	1.03494	0.294841	2.51382	-2.06987	-0.731779
-1.62551	0.247129	1.41445	0.424397	0.308167	-1.31207	-1.37933	0.880201	-1.07633	1.34531	1.59135	1.03022	1.47109	0.187076	0.812902	0	4.60504	-0.284657	0.51348	-2.58464	0.0152288	3.62982	1.56954
-2.1884	-0.640888	0.280505	0.231971	-3.12525	-1.05644	0	-0.488044	-2.03734	0.665929	-1.64798	-1.56861	-2.50736	0.0389302	0.685809	-1.77854	0.344658	-0.661644	-0.384863	0.602411	0.0152265	0.654514	-0.725652
-0.624637	-0.622964	-0.561799	0.773882	0	0.636049	0.554018	-0.884527	1.98814	-0.665929	0.470944	-0.2574	1.03628	-0.0233563	0.920436	-0.163265	-1.63948	0.244145	0.512822	0.499252	0.0608828	0.372093	0.223839
4.28723	0.7033	1.39862	-0.284418	-1.92314	2.55919	0	1.56712	0.196657	1.10743	-0.188111	0.846919	-0.581585	-0.319751	0.885722	1.29872	0.726009	0.0986318	0.127796	-1.20242	0.303859	1.47468	0.390517
2.60548	0.987949	-1.68071	-0.571275	-0.975617	0.117549	0	-1.66589	-0.591135	-1.55386	0.563276	-1.70757	-0.194616	-0.258105	0	-0.161421	-1.08055	1.1986	1.01653	2.09484	0.0151688	1.27274	0.721224
-1.6995	0.468756	-1.4225	-0.505984	-1.98026	0.817973	0	-1.09291	-0.197824	-1.35137	0	-0.868123	1.09785	0	1.4244	0.964638	-0.637158	-0.363729	0.252525	-0.296589	-0.0151688	-0.180832	-0.165975
-0.368987	0.129422	0	-1.51958	0	0	0	0	1.13218	0	0	0	0	-0.400205	0.220336	0	1.88704	0.00484766	-2.03829	-0.795233	-0.273432	0.900907	0
0.00344559	0.94401	0.286123	0	0.332779	-1.4071	-0.832182	-0.601204	1.11951	-1.14026	1.13564	-0.869113	1.40308	-0.0471884	0.51653	0.955421	-0.210679	-0.247531	-1.29535	-1.40706	-0.610316	-2.68137	-0.110803
-0.315517	-0.635512	0.569802	0.139101	0.662254	-1.12795	0	-0.40282	-0.290839	1.14026	-0.761873	1.39872	-1.59595	0.227871	0.115852	0.631914	-0.327224	-0.0899423	0.908507	1.10721	0.914083	-0.415417	-0.50014
1.67606	-0.22231	-1.43064	-0.18087	1.6367	0.417428	-0.839166	-1.21829	-2.65633	-0.682597	1.6098	0.908802	1.46921	-0.164958	-0.438371	0	-3.04981	1.2615	0.643917	1.49034	-0.273349	-2.15062	0.997791
-1.77931	-2.31682	-0.578036	0.804443	1.61034	-1.86092	-1.12996	0.305967	-1.65875	-1.61108	-0.903482	-0.142266	0.883844	-0.110124	-0.869514	-1.42746	1.19477	0.487909	0.894575	1.2739	0.0152057	2.61209	1.36951
-0.840842	-2.28904	-0.873368	0.660886	1.26986	-4.77733	-1.71924	-0.101885	-3.34997	-2.11028	0.0925669	1.57939	0.376412	-0.078734	-1.08775	0.636945	0.15204	0.548147	-0.254777	0.582526	-0.503012	1.68915	0.488468
-3.61352	0.979997	2.31224	-0.247321	0.941922	2.91147	0	1.61783	0.626961	0.943403	-0.0740467	-1.32733	0.375	0	-1.48682	0.316957	0.714859	-0.444643	-0.383387	-0.387973	0	-0.59024	-0.162558
-0.341151	0.675152	1.98026	0.219871	2.46926	-0.560731	0	1.39444	0.984719	3.23354	-0.33389	-6.25266	-1.38193	-0.410419	-1.02165	1.72553	0.609885	-0.916139	-0.771212	-1.36988	1.81713	0.45434	-0.0542446
1.30395	1.05914	-0.561799	1.67431	0.910477	1.54417	0	-1.39444	0.668211	-0.913248	-2.23588	-1.21675	-2.75747	0	-0.85488	-0.780644	-1.42608	-0.273426	-0.129116	-1.38891	0.896331	-2.29263	-2.19427
1.3397	-0.785931	0.281294	-0.758811	-1.21582	2.35003	0.2886	-0.301356	-0.668211	0.229095	1.32127	0.831202	0.518808	0.331623	-0.628847	-1.26185	-0.20721	-1.36132	-2.35305	-1.40847	1.47626	1.92932	-1.84724
-1.07236	-1.17195	-0.563382	1.1764	1.21582	3.01054	0	0.301356	-1.50691	1.13767	-0.262862	3.1104	0.965569	0.0866722	-0.315913	-0.158856	-1.05537	0.203061	1.9647	-0.20284	-0.0293126	0.950879	0.450959
-0.788217	-0.448666	-0.282886	1.44137	-0.606062	0.831519	-2.03792	-1.10944	-3.4624	0.225989	-0.963453	-0.0869653	0.383632	-0.015753	-0.12389	-0.159109	-1.53471	-0.701447	-0.129786	-1.94778	-0.323007	-4.14043	-1.35902
-0.310738	0.649911	-1.13961	-0.931849	-0.916037	-0.709549	1.45988	-0.203046	-0.10846	-2.05252	-5.56187	-0.799601	-3.11107	0.0393778	-0.0137751	0.47657	-0.130412	-0.890821	-0.520835	-1.45988	-0.294551	-4.27026	-1.43557
-0.623349	-0.687391	-1.73415	0.160364	-2.17063	-2.11474	-1.45988	-1.22701	-1.97267	-0.693644	-2.1912	0.692463	-1.86052	0.173078	-0.110269	0.631914	-1.30915	-0.456304	-1.57898	-0.843887	0	-0.491401	-1.10498
1.37355	0.277019	0.291121	-0.267416	-2.53982	0.168971	0	-0.412372	0.881548	-0.932408	-1.44631	-2.45519	-2.10106	-0.102237	-0.511581	0.157356	0.768306	-0.190604	-0.265604	-0.212089	0	-2.54441	-0.999127
4.14717	0.171815	-2.95007	-0.604313	0	0.253438	-0.886269	0	-0.21966	-2.36978	-0.208333	-0.99366	0.0684697	0.259322	-0.277624	1.25002	1.0485	0.429801	-0.266312	-0.532199	-0.0885348	2.74126	0.471421
1.8059	-0.149388	0	-0.404913	-1.62078	0.964413	0	-0.82988	-0.275255	0	-1.49178	0.663536	0	0.149002	0.0694782	-1.25002	0.375818	0.0107836	-0.400802	0	0	0.588237	0
-0.235815	-0.0672973	0	0.364496	2.58079	1.3204	0.886269	0.82988	0.385145	0	2.30184	0.563304	0.953686	0.47688	-0.20858	1.09462	0.768822	-0.462248	-0.402415	-0.427808	1.17407	-0.244678	-0.767192
-0.759049	0.358397	0.597017	1.08558	-0.63898	-0.755141	-1.48151	-0.206825	0	1.4286	-0.0827815	-0.164541	-1.09067	0.81557	-0.139295	0.928799	0.805408	2.3968	3.30499	2.43527	0	0.146879	2.68865
-0.530324	0.0893988	0.593474	0.0932649	-2.59755	1.00224	0	-0.207254	-0.330033	0	0.0827815	0.0960154	0.342115	0.332085	-0.181374	0.614441	0.444662	0.0187104	1.16356	0.417537	0.581904	0.390625	0.0576535
4.50422	1.55168	-0.891536	0.265993	0	0.73864	1.48151	0	-2.34124	-1.18907	-1.1443	2.25703	0.204708	0.192567	-0.181704	0	-1.04491	0.38806	-0.128617	0.208117	-0.888765	-0.930239	0.460035
1.78164	-0.617785	-0.298954	-1.1757	-0.991744	1.99083	0.293686	0.207254	-2.10894	-0.720291	-1.62434	-0.456775	-0.683997	0.0538524	-0.0979775	0.76278	-1.8531	0.736247	1.40577	1.13696	-0.572395	-0.0492005	0.743073
0.498553	-0.725607	-0.600602	-0.755433	-0.666669	-0.307268	0	-0.207254	-0.115274	-0.725517	0.572581	-0.114521	-0.412655	1.19267	-0.168185	2.69881	0.563871	0.465423	0.632513	-0.618559	0	-1.38753	0.0569314
0.54619	-0.611212	-0.301659	0.513237	-2.36898	-1.21173	0	-1.14764	1.71531	-0.243013	-0.615125	-0.0539374	-0.414365	0.666568	-0.53446	-0.444775	0.302311	-0.421999	1.25315	-0.414508	-0.872206	0.0997506	0.227402
-1.97595	-1.90971	0	0	-3.13069	-2.2351	0	-1.3735	0.565293	0.968531	0.636269	1.93688	1.10118	0.474488	-0.949352	0.148478	-0.354227	0.382763	1.60596	0.103788	0.0148467	-1.60807	0.67912
0.844184	1.29474	0	0.282505	-1.78258	-2.49466	0	-0.533335	-0.112803	-0.968531	-0.593725	0.461956	-0.274161	0.127652	-0.657051	-1.04401	-0.703525	0.578976	-1.60596	1.33954	-0.0148467	-1.01834	1.84414
-1.09348	-0.195783	0.301659	-0.511786	-1.085	-2.13336	-4.80573	0	-0.452489	1.2092	2.81	1.7621	1.22785	0.0750131	-0.546057	-0.150038	1.94642	-0.0446016	-2.01265	-1.33954	0.296516	2.27685	0.772205
-1.98333	0.301046	0	-0.0540249	0	-0.884317	-3.12525	-0.321371	-2.11982	0.240096	2.26934	1.86502	1.41369	-0.383157	-0.781141	-0.150263	0.592335	-0.228896	0.126984	-1.14764	0.16271	0.499003	0.05493
0.384021	0.322617	0	-1.10033	0.362977	-4.031	0	-0.645858	-1.69347	-0.963863	1.66387	0.626644	0.931477	-0.0602364	-0.816569	-0.906351	0.913557	-0.207816	1.01011	0.104877	0.303412	0.891978	0.219419
-0.267237	0.0599071	2.08651	0.0819225	0.361664	-2.42049	-0.636945	-1.74296	-0.353983	1.20338	0.476002	0.960791	0.988476	0.420895	-1.04497	-0.914641	-2.07596	-0.205041	0.250941	-1.47838	-0.111459	-1.09128	-0.274349
0.487973	-0.495311	1.46415	1.26129	-1.08894	-2.07921	-0.963089	-0.993934	-1.12928	0.238949	-0.575456	-0.463544	-4.8364	-0.0225031	-0.772319	1.21767	-1.51154	0.491873	-0.125392	0.847463	-0.0737844	-1.76105	0.274349
0.0556979	-0.127978	-1.46415	-2.49723	2.52266	0.20006	0.322061	0	-2.11424	-0.238949	1.4619	2.5233	2.17844	-0.127613	-0.703227	-1.83211	0.418064	0.271691	1.12291	1.04933	-0.029529	1.31116	0.382828
0.186692	-0.0904364	0.588237	-0.512573	0.709223	2.59575	0.641028	0.663719	-0.550966	0.71514	0.293743	-0.990564	0.0673174	0.0600736	-0.677969	-0.308642	1.93671	-0.699443	1.23306	0.520563	0.618285	3.10753	-0.437637
-1.27796	0.218415	-0.883658	0.166528	1.75136	0.967856	0	-0.220751	1.64387	-1.43543	1.06974	4.14821	5.3713	-0.18785	-0.636945	0.462607	-0.662863	0.321585	-1.60596	-0.834207	-0.220378	-2.11051	0
-3.68858	1.13706	-0.593474	-0.361162	0.346621	2.88148	0	0	1.43887	0.240674	1.07756	-2.21925	0.31837	0.262891	-0.932372	1.37512	-0.47741	1.08271	0.372903	1.24872	0.0441144	0.987175	0.764613
-2.31036	0.156082	2.06193	-1.24625	-0.694447	-0.250159	-0.32	0.110436	-0.716849	0.956945	1.53835	1.29555	1.45159	0.247237	-0.724362	1.65542	-1.46793	-1.09549	-2.00508	-2.83186	-0.27972	0	-2.47878
1.2039	0.0519731	0	2.3809	0	-3.1787	0	-0.331675	0.716849	1.18345	0.60128	-0.311807	0.125235	0.157015	-0.760814	-0.598804	0.44526	1.60537	0.126502	0.318641	0.0147417	-3.39693	1.87851
-1.24342	-0.550802	0.870833	-0.0412854	1.03987	-0.22593	0.956945	1.10133	-0.178731	0	-0.488264	-1.02014	-0.753772	0.268597	0	1.63816	-2.44259	0.252007	0.378549	1.99482	0.103131	-1.07281	0.218699
-2.47653	-0.0447928	0.57637	-0.372337	1.70944	0.837573	0	0.872416	-0.958665	-0.708385	0.13169	0.0727802	-0.189334	1.19247	-1.52339	0.735838	1.04341	0.797358	1.62402	1.3423	-1.17012	0.153965	0.870044
0	0	0	1.20847	0.33841	0	0	0	0	0	0	0	0	0	-0.954054	0	0	0	0	0	0	0	0
0.892085	0.625281	-1.15608	0	0	-1.58484	0	-0.108637	-0.422323	-2.15577	-1.07741	-0.815735	-0.824616	0	-0.753752	0	0	0.409865	0	0	0	0	0.216333
0.614897	0.724587	-1.1696	2.46726	-2.39328	0.876754	0	-0.763779	1.73813	0.483093	-0.30453	1.05795	-0.63898	0.601925	-0.370938	0.584797	-2.16099	-0.259076	-2.25573	1.02042	0.0297929	-4.61782	-1.35983
-2.76048	-2.21983	0	0.0798722	0	1.25213	0	0.437159	-1.67769	-0.483093	-3.82757	-3.22053	-2.59755	0.73645	-0.48591	0.291121	-0.284752	-0.524077	-1.27553	-0.611	-0.597552	0.321716	-0.714485
-3.65664	-3.06704	-1.18345	0.252509	-0.346621	-2.88293	0	-0.32769	-0.666871	-3.44862	-0.456576	0.858268	-0.395518	0.290171	-0.798765	0.435099	1.31749	0.134981	1.90724	-0.306906	1.47247	1.48781	-1.27673
2.53096	-2.95588	0	1.39715	1.37933	0.164858	0	0.545555	0.485438	-0.250941	-1.24126	-1.01454	-1.93404	0.980329	-1.00338	0.577202	-0.0446808	0.26164	1.12713	0.306906	1.45111	-1.43429	-0.223714
-1.90276	-0.730663	0.593474	0.209205	-1.37933	1.53062	0	1.08226	-0.973244	-0.503779	-1.50196	-1.36048	-0.743498	0	-0.547038	-1.7417	0.543746	-0.962711	-1.00126	-2.48203	-2.088	-0.913739	0.111919
1.98837	-0.0644901	1.75958	-0.694675	0.692044	1.47514	0	-0.539667	-0.306091	1.50379	0.652265	-0.438528	0.945314	0.0215169	-0.383047	0	0.937894	-0.432792	0	-0.104767	-0.895528	0.645858	-1.01181
1.36357	-0.501214	-1.75958	0.537812	1.02917	1.70456	0	-0.978801	-4.45075	-0.249066	0	-2.79671	-1.42134	0.300752	-0.36777	1.7417	0.202349	-0.299327	0.501883	-0.525487	1.78311	-0.970358	-1.47982
-0.270915	-0.928194	1.17648	0.0261609	-0.684934	-2.40788	0	0.10923	-1.09572	5.10439	-0.529641	-1.3585	-1.58025	1.08094	-0.117302	2.27606	-0.356585	0.074323	1.36733	-0.528263	-0.0147286	1.13117	-0.805992
-1.73305	1.1872	-1.17648	-1.91463	0.684934	1.52709	0	-0.10923	4.62254	1.17787	0.712326	-1.45802	-0.69493	0.240198	0.401607	1.11889	0.733795	0.208442	1.71363	0.21164	-0.0147308	1.2244	-0.579712
-0.754417	1.07735	3.77403	0.862818	4.99272	-1.69157	0	1.73352	2.14272	3.67858	-0.978202	-0.547206	-1.12203	0.731162	0.682369	0	0	-0.372184	0	0	0	0	-1.1108
-0.580006	1.16867	-1.43474	0.0660633	1.61034	-1.12596	0	-0.430571	-1.46433	-2.2832	-2.44622	-0.522975	-1.20612	0.153986	1.40001	5.80852	1.04521	-0.677586	-0.608645	-2.35305	0.264823	0.685476	-1.06384
-1.48884	0.959655	0.863315	0.395466	-1.93554	-3.09427	0	0.859296	-0.740287	-0.231214	0.293378	0.407748	0.285104	1.6715	1.78316	1.43325	-3.59473	-0.445748	-2.22231	-1.41692	-0.885484	-3.04105	-1.79861
3.10744	-1.53036	-2.61263	-0.752727	-2.97543	-2.5395	0	0.213675	-2.50797	-4.25596	-4.80058	-3.20441	-4.29001	0.247304	2.08291	1.02961	-0.879592	-1.56132	-0.626176	-1.5487	-0.594709	-2.35692	-1.64688
1.52665	0.562801	1.45988	0.225091	0.335009	0.251818	0	-0.106781	-0.317965	1.20049	1.48183	1.65293	3.00059	1.58598	1.93243	-4.05019	0.812206	-0.161146	1.61997	1.32892	0	1.37705	0.2457
4.30511	1.68519	-1.45988	0	0	1.48707	0	-0.750674	0.571612	-0.95924	0.496279	0.706959	0.861455	0	1.82004	0.664454	-1.83683	0.0838609	1.22852	0.32949	-0.628274	0.0546896	-0.368777
0.234215	-1.25926	0	-2.3011	0	-0.32895	0	0.964121	0.442339	-0.968531	-1.34347	-1.92666	-0.645395	-0.284033	2.48479	1.44644	0.447571	-0.895151	-2.59755	-0.991744	0	0.762531	-0.803714
-0.212076	0.431966	2.32569	0.229807	-2.71203	-3.12926	0	-0.320342	2.30612	0.485438	3.09303	3.91751	1.99437	-1.47362	2.16446	-4.40365	-0.200703	0.278805	0.375235	0.331675	-0.602049	-1.03628	0.680485
-0.156582	-1.39686	-1.15608	-1.11339	-2.4349	0.823804	0	-0.536194	-1.11525	0.483093	1.11474	1.43121	1.19174	-1.39804	2.16109	-0.821922	0.836635	0.266597	0.373832	0.550359	0	2.11562	0.0616333
2.44046	0.412404	0.290276	3.72547	-1.06196	1.51249	0	-0.215285	-0.813267	0	0.0418235	0.986526	0.278358	-0.349089	1.83775	2.71387	0.316456	0.427034	0.496279	1.20023	0	0	1.10295
1.79192	-0.762695	0	3.3248	-3.62358	-2.15482	0	0	0.438735	3.08447	2.1306	0.710818	1.037	-0.547024	1.4764	-1.75562	0.979167	0.366088	1.23003	1.61381	-0.120846	-0.862539	1.45193
-0.559903	-1.09054	0	3.95437	-4.14372	-0.831606	0	1.28481	1.61294	-4.2966	-0.451283	1.50912	0.343289	-0.0562746	1.53588	-1.50998	0.0268144	0.262174	-1.72631	0.21322	0.0151137	-1.25308	0.419539
0.823751	1.94026	0.865806	-4.27298	0	-1.03684	0	-0.42644	2.37165	0.729043	0.819005	0.223778	1.42908	-0.0492663	1.04657	1.50998	-0.0402244	1.63989	-2.90241	0.531069	0.0151114	1.03628	0.952388
1.55109	-2.38469	-1.4472	-1.24592	4.14372	-0.306275	0	-2.15991	-1.88055	-0.242424	0.650409	-0.00638672	0.135044	1.26615	0.837381	-0.958255	-0.546866	-0.326472	-2.06993	-1.06497	0.030216	-0.43502	-1.13198
-2.58877	1.52699	1.73415	-1.05244	1.8282	-1.26626	0	0.869571	2.12065	2.63488	1.92622	2.85842	2.53178	-0.683549	0.449023	1.77237	1.83933	-0.0263235	0.651468	0.958984	0.0151046	1.99629	0.358852
0.184792	-1.78648	0.855925	0.195733	3.90814	-2.48543	-1.60003	0.431966	0.716849	-0.236687	0.969057	0.55707	1.11221	0.272584	0.0658631	1.87422	0.418346	0.538647	-2.23253	-0.42508	-0.0151046	0.373234	2.35999
-0.914153	0.251389	-1.43064	-1.36503	3.42499	-0.669073	1.60003	-0.974561	-3.45175	-0.952388	0.608262	0.381962	1.03561	0.0906966	0.171041	-0.798939	0.105411	0.00317395	3.00873	1.58482	0	-0.533619	-0.350468
-5.81464	-1.00937	0.574714	-1.58511	-0.337268	0.11117	0	0	-1.17758	0.477328	-0.254628	-0.604418	-1.10069	0	0.236345	-2.29895	-0.572311	-0.558576	-1.95192	-1.47838	-0.302572	-2.6567	-0.117096
-0.82655	0.644243	-0.574714	0.401984	0	0.112352	0	-0.874323	0.0623247	-0.477328	-4.86235	-2.53099	-3.71395	0.341119	0.117963	0.681666	0.765276	0.257396	0.785344	1.05821	0.332779	-0.661524	0.642338
1.44408	1.81245	1.43064	-0.455704	2.00676	2.16984	0	-1.43728	-3.68062	1.89579	2.05815	2.26463	0.9415	0	0.143989	0.677051	-1.19889	0.874012	1.68071	1.15124	0	0.441502	0.638238
0	-0.19177	0	-0.0671908	0	0	-3.22609	0	0	0	0	0	0	1.18827	0	0	0	-0.00552275	0	0	0	0	0
5.9586	0.860083	-2.29895	0	0.660068	-1.42836	0	-1.45824	-0.518472	-1.89579	0.100796	-0.640928	-1.00909	-0.0549564	0.104589	-1.35872	-0.0842852	-0.388144	2.15608	-2.10313	-0.332779	0.384722	0.519182
0.514941	-1.67117	1.44303	0.255085	-0.660068	-2.01477	-0.988476	0.33841	-0.97944	-0.239521	-2.7371	-1.39555	-3.02013	1.07984	0.33916	1.62826	0.433975	0.429163	2.11057	0.635595	-0.30349	-1.60357	-0.172761
-0.768287	-0.606577	-0.574714	-0.362684	1.96728	-1.05956	0.988476	0.112549	-3.94832	0	0.0621054	-0.412319	-1.26229	1.81205	0.713686	3.04861	0.304428	-0.314381	1.09958	-1.70398	-0.273931	-1.45988	-0.926469
-1.11994	-0.520538	0.860837	0.910924	2.24729	0.758921	-0.328408	0.784318	-3.33133	5.14132	-1.33335	-0.983719	-0.779317	1.66168	0.721467	0.909688	-0.61865	1.1242	1.68679	0.107354	0	0.844837	1.84443
-0.522799	1.55355	0	-1.28844	-2.89875	2.16755	1.63136	-0.111669	0.843294	0.227531	-0.588979	-3.01059	-5.48183	0.183667	0.384369	0.258398	-0.751933	0.188357	0.476759	1.91292	-0.0304832	-0.056101	0.171184
-0.284059	-1.8312	0.285307	-0.568953	-1.31581	-2.28169	-0.975617	0.223214	0.488657	1.80185	1.52835	1.17722	3.6153	0.144073	0.764335	0.771212	-0.210126	1.13279	1.53395	1.04713	0.0152427	-0.50633	0.964546
-0.517547	-0.1473	2.25362	-0.476613	4.53152	-0.568634	0.326265	0.887908	0.763098	1.98902	-4.96216	-5.11729	-3.39016	0.847131	0.771131	-2.06993	0.102883	-0.139836	-1.29642	-1.15245	-0.611529	-0.62235	-0.452746
0.261103	0.122765	0.555557	-0.314444	1.56989	3.69689	0.972455	0.770505	1.37271	0.65431	-0.262353	-0.275634	-0.150038	0.517767	0.76523	0.130634	1.98316	-1.33789	1.41345	-0.422387	0.0153339	0.0567376	-1.02623
2.48135	0.456994	0.827591	1.03529	-5.11293	1.45527	0.322061	0.437637	-0.478306	-0.873368	0.306011	0.756173	0.673403	-0.491815	0.709797	-0.786374	1.31933	-0.784244	4.68389	-0.636945	-0.307126	1.85451	-1.3849
2.04504	0.972297	-3.06858	-1.13119	2.26914	-1.05325	-0.645164	-1.20814	-1.6575	-1.76996	0.609227	-1.35831	-0.598356	0.0389156	0.704794	-1.85928	-0.633545	-0.0576644	0.222966	0.531069	-0.64805	-2.08165	-1.64034
-1.60633	-0.606577	1.12677	-0.756693	-0.643089	1.8089	-1.63136	0.220751	-1.40255	1.98902	0.6702	1.18696	1.8581	-0.188232	1.15155	-0.134138	-1.00626	-0.147076	-1.34531	-1.60174	-0.62112	0.0568343	-0.770831
1.13154	-0.0162259	-1.12677	-0.929594	0.963089	-1.00839	0.65574	-0.110314	-1.13638	0.218579	-3.55301	-5.09431	-2.83813	-0.776133	1.00589	-2.72126	-0.299454	1.01014	0.562748	1.38965	0.311042	1.6343	2.17848
0.934056	0.687288	0.846267	-1.48858	0.953902	1.22343	-1.31581	0.330579	-1.07721	2.15991	-0.71701	0.245134	0	-1.09284	1.3534	0.275482	-0.570558	-1.72009	-3.42499	-2.25452	-0.904701	-1.06773	-2.59602
-1.58493	-0.776577	1.39472	-2.24632	1.56989	-1.07984	0.330579	0.439079	-0.434154	2.7399	0.582961	1.11709	1.12996	-0.590873	1.48781	-0.690134	0.0487794	0.0645323	0.924862	0.21692	0.0156678	1.01181	-0.359282
-4.24138	-0.0731143	-2.80917	-0.0289436	2.46166	-2.45263	0	0	0.217313	0.414938	-1.10151	-0.0213652	-1.35749	-1.3002	1.43134	-1.11422	1.12418	-0.540648	0.229885	-0.543184	0.484489	0.779948	-0.722459
-0.857416	-1.4324	-1.14614	-2.00284	-0.304414	-1.3811	0	-1.21214	1.00793	1.02988	-2.05534	-2.00719	-0.991996	-0.114745	1.69554	-1.12677	-1.27503	-0.480002	-0.922729	0.326265	-0.312305	-2.13132	-0.666871
-3.25701	-1.01919	-0.2886	-0.755951	-2.15725	-2.43338	-1.66393	-1.00279	-3.945	-1.86148	-2.00426	-0.590359	-2.64196	0.0742616	1.43238	0.564973	1.53334	0.286031	2.17774	-0.435256	-0.297596	2.07581	-0.3046
-1.2537	-3.00978	-1.45563	-2.01389	-0.625002	-1.47497	-1.35137	-1.694	-1.42592	-0.838579	0.117633	1.79663	0.627946	-0.738311	0.969529	-1.13316	0.104886	0.357192	0.790518	1.72977	0.0313676	0.166436	1.09224
2.69142	3.66557	-2.374	-0.365019	-0.628933	3.3062	0.339559	0	0.828006	-0.421942	0.772928	0.429862	0.624027	-0.853451	0.497816	0	0.990968	0.43953	-0.338028	-0.645164	0.0156801	0.662986	0.721591
-1.84143	0.709047	0.598804	1.45215	-0.632914	5.55089	-0.680275	0.341103	-2.35126	-1.92108	0.8827	0.655553	-0.311527	0.396907	0.528287	1.2739	-0.160149	-0.931601	-2.74617	-0.540834	-0.3298	-0.607569	-0.661259
0.940847	0.352647	0.298063	0	-1.60003	1.03189	0	0.453002	0.229973	0.644471	2.30894	1.20016	1.70151	0.300055	0.438117	0	1.14996	0.21588	0.347424	-0.217155	0.939415	2.57055	0.0602954
1.109	-0.426615	-0.298063	1.1497	-0.972455	-2.03775	0.340716	0.33841	-0.923083	0.640344	1.10126	2.05591	2.12451	1.24511	0.174711	-0.847463	0.486993	0.222614	-0.812541	0.108637	0.94611	0.107933	1.25788
-1.0418	1.65522	0.891536	-0.401637	6.31124	-3.30499	1.35137	0.337268	5.41486	4.37114	0.312431	-0.0550131	0.598804	0	0.0654379	0.565772	1.09768	-0.502786	-0.819197	-1.20154	0.339036	0.215517	-0.956945
3.47337	0.137379	3.77403	-0.673	-0.306279	-1.01331	1.99342	2.9853	2.38709	7.64329	2.50838	2.64057	3.23082	0	-0.0109033	-0.141143	-0.0716801	-0.0361825	-1.18205	1.31006	0.0307645	1.07067	-0.0601142
1.1353	0.828345	1.41445	1.932	7.10358	0.828282	0.982005	2.68689	2.81907	5.32725	0	0	0	0	0	0.282088	-0.342242	-1.68198	-0.357356	-1.20023	0.582734	0	-3.17681
-0.6531	-0.320873	0	-2.26267	0	0	0	0	-0.627398	0	0	0	0	-0.789931	0.239599	0.701757	-0.670972	0.0408837	1.77414	-0.329852	0.913248	-2.26181	0
0.0740559	1.33287	0.839166	0	-1.43887	4.08315	1.93554	0.634252	-0.63136	0.890478	-1.99721	-0.739648	-0.361926	-1.06304	0.509956	-1.26673	-0.911724	-0.125976	-1.41679	-0.773912	0	-0.218103	-0.935461
-1.03574	-0.492768	-0.558661	0.180505	-1.45988	-1.87352	0.953902	0.525487	1.32823	-3.79449	0.904784	1.89858	0.938296	0	0.064914	-0.85349	0.171851	0.15295	-0.715994	0.442969	0.332779	-0.93228	-0.125392
-2.4346	-0.551274	0.836825	0.703859	-2.08031	-2.11772	1.88093	1.56009	1.4478	-0.739375	-2.82964	-1.18573	-2.25218	2.71008	0	0.995033	-0.343998	-1.09046	-0.119832	0.660795	-0.940684	-1.72274	-3.51137
-1.72844	-0.473801	2.46926	0.416978	2.9588	0.849356	0	2.24499	-3.83723	2.56424	0.33841	0.860723	-0.589537	-0.54824	0.140503	-0.709726	-0.137931	0.215419	-0.48077	-1.77192	-0.0152451	0.892863	1.09856
-1.1382	-1.23108	-0.54348	-3.06323	6.49029	-3.4362	2.15062	0.40282	-0.713779	0.541029	1.47555	1.12966	1.83088	-0.295421	0.172656	0.568183	0.880344	-0.178244	1.0785	-0.447929	-0.30539	1.43411	0.895719
0.371285	0.771202	0	0.580598	-1.09891	-0.877822	0	0	0.428878	0	0.927773	-0.0262795	-0.290698	1.34912	0.096988	0.564973	0.550026	0.91671	3.16742	3.09417	-0.107107	0.818112	1.26584
2.87732	2.23902	-8.52789	-0.228781	-4.23194	0.223907	0	-5.57996	4.32726	-7.8545	1.26722	0.583092	0.725166	-0.665604	-0.0646482	2.09067	-0.443195	-0.31312	0.345822	-0.545555	0.701757	0.0543036	-1.20217
2.01067	1.08534	1.76475	0	-3.22136	-1.49401	0	1.37205	1.08697	-0.194742	1.01524	2.24148	2.35641	-0.757503	-0.302245	-0.276243	0.880201	0.785043	-1.04107	0.436682	0.0303998	3.88657	1.13925
-0.139646	-0.00782258	0	-1.38379	3.22136	-0.174891	0	0	-1.22367	-0.97944	-1.10212	-0.294268	-1.42149	0.262088	-0.0432526	0.414079	1.10726	0.485919	-0.232829	0.975617	-0.916037	0.260756	1.18863
0.0627638	0.662745	0.581397	0	-0.2886	0.110203	0	0.209424	0	-0.592302	0.822337	1.29215	0.71327	0.107325	-0.064914	-1.38698	0.0418603	0.675378	1.04349	0	-0.276455	1.85764	1.11318
1.41584	0.209603	0	2.49229	1.71924	-0.887825	0	0	2.56597	0	1.49735	2.83079	3.01038	-1.30915	-0.43384	0.27894	-0.739313	0.0169066	0.345423	-0.215983	0	-1.33816	0.0614817
0.565136	0.170463	3.9778	-0.105764	0.283688	0.295433	0	2.47947	-0.400802	0.592302	-0.788664	-0.499215	-0.483928	1.22196	-0.359341	0.970209	-0.0717012	0.311055	-2.4434	-0.759635	-0.308072	-1.61926	0.368099
0.596485	1.08567	-2.53892	0.842998	0.846267	3.19344	0	-0.102093	0.066912	-1.38753	-2.0539	-3.10613	-2.24256	1.89431	-0.590811	-0.414652	0.769154	0.446002	0.352734	2.04859	-0.309024	0.26295	0.610503
0.0783763	-1.55126	-0.860837	-0.541111	0	2.36624	0	-1.12996	0.0668673	-2.0162	0.934891	-0.620147	0.353732	-0.204317	-0.760041	-2.66682	0.396967	0.327826	-0.588583	0	-0.030955	2.69446	0.303859
-1.92934	-1.02413	-2.33247	-0.256546	-1.98588	-1.31474	0	-1.56172	-3.12313	-3.10263	3.32016	2.75775	3.40192	0	-0.665634	-0.142349	3.32216	-0.414149	1.52317	-1.1809	0.030955	2.27455	0
-0.746744	1.74486	0	0.797656	-2.02612	1.24004	0	0	2.1154	0.836825	1.68141	-0.106114	1.89323	-0.178294	-0.502149	-1.14614	1.60868	-0.190493	0	-0.650056	0.617095	0.349215	-0.364742
4.00646	0.539085	1.46415	-0.782547	2.02612	2.87024	0	1.66497	0.940867	0.415801	0.962826	1.53697	0.467759	-1.29051	-0.718539	0.28777	0.00793903	0.890114	2.18525	1.18856	0.0615006	0.89242	1.03
2.3522	0.711747	0	1.90054	0.855925	-0.363737	0	0.411947	-0.267917	0.414079	1.35671	1.96097	2.30653	0.70054	-0.73509	-1.15608	-0.0436725	0.669523	-0.456101	-0.430571	0.0307361	0.68864	0.541029
0.24713	0.296973	-0.875918	-0.40104	-0.569802	-3.29492	0	-0.308801	3.29845	-1.45684	0.980694	1.65076	1.3588	0.252324	-0.455063	-0.583092	0.645202	0.0812088	2.14819	1.17964	0	0.146951	0.835826
-1.99	-0.53366	-2.374	0.445501	-1.72915	0.600761	0	-3.46128	-0.259909	-2.76319	-2.05239	-0.463762	-1.2286	-0.239028	-0.399886	0.146092	-0.363651	0.284892	0	0.319319	0	0.731532	-0.536514
1.78608	1.82546	0.598804	0.987844	-1.1696	1.59624	0	0.532199	-0.391135	-0.21575	0.830048	-1.33787	0.583849	0.292068	-0.275135	0.582243	0.142456	-0.176191	0.668899	-0.106326	-0.0307361	0.581397	-0.0597907
-0.0175661	-0.0901104	-0.298954	1.02176	2.89875	-0.701812	0	-1.7131	-2.98332	-0.650056	-1.15585	-0.624036	-0.974983	0.739619	-0.483315	2.29565	0.0553447	-0.101608	-0.557105	1.6878	1.90308	0.289436	-0.660068
-2.75978	-0.0450857	1.19049	-0.218071	-1.43887	0.996116	0	0.21575	-1.1506	-0.65431	1.09535	0.545489	0.456175	-1.47139	-0.682913	-0.711747	0.347181	-0.88575	-1.23667	1.04059	1.54137	-1.26032	-2.00676
0.877625	1.24736	1.75958	-0.789016	-0.290276	-1.21897	0	1.07182	-1.50894	1.7354	-0.404286	-0.308745	-0.39088	-0.267433	-0.395671	-1.72915	0.57336	0.0651745	-1.36676	0	-0.0297044	1.45281	-0.184445
-0.48597	0.377848	-0.583092	0.351443	-2.95007	-2.255	0	0.212993	-0.415513	-1.08109	-0.60951	-0.956479	-0.654881	0.0736155	-0.16338	-1.46415	1.04786	-0.333473	2.49164	0.619197	1.82519	2.18744	0.613499
-1.1137	-0.429821	0.583092	1.13373	0	0.643808	0	0.106326	-0.696382	0.650056	1.05414	0.555506	1.75843	-1.04234	-0.140252	-1.33632	-0.384369	1.46171	0.557726	0.717584	0	1.21554	3.07161
-1.73116	-2.16208	-4.1549	-0.101222	-0.902262	0.977703	0	-3.02073	-2.47625	-4.41573	-2.1401	-1.63873	-1.88992	-1.34066	-0.292826	-1.05185	-0.514802	1.00448	0.554633	0.305967	0.0729022	2.06952	1.29642
0.507922	0.838849	1.20483	-3.20474	-1.5221	0.707826	0	0.109469	-0.646786	-0.225989	0.554701	0.972974	0.524936	-0.0411156	-0.552845	-0.758154	-0.168274	0.130583	-0.665929	0.203459	0.029146	-3.00323	-0.117165
-2.61586	-1.81499	0.597017	-0.029882	-0.615387	-0.707826	-4.34851	-0.768812	1.7864	0.451468	-2.53126	-2.11812	-1.91615	-0.398325	-0.472926	-0.917438	-0.243128	-0.237196	0.444445	-1.63938	-0.029146	-1.98964	0.292655
-2.23218	-2.86856	-2.40976	0	-0.930239	1.48444	0	-1.2202	-2.50999	-3.90405	-0.0420345	0.256306	-0.40107	-0.572791	-0.415653	1.52442	-0.369744	-1.02837	-1.67695	-1.66671	-0.0145762	-0.961546	-2.60524
-1.30295	-0.355521	-0.305344	-2.11424	-1.25393	0.514843	0	0.222966	-1.24225	-2.36978	-1.63191	-1.11123	-1.82499	0.655333	-0.39349	1.35239	2.37541	0.241215	1.00954	1.14884	3.72003	3.8849	1.78364
1.45277	-1.44289	-0.306279	-0.137457	0	2.17567	0	0.665929	2.25382	-1.20629	0.575265	1.82045	0.408442	0.247219	-0.611183	-2.72332	-0.621492	0.802727	3.40132	1.23841	0	-0.325809	0.470312
0.491716	0.576463	0.306279	-0.107042	0.314961	-2.17567	0	0.661524	0.644932	0.484262	3.17819	2.02511	2.94533	-1.59705	-1.01487	-0.461185	-0.0619747	0.873537	0.537925	1.02042	0	2.3498	0
0.759088	-0.351888	-0.921666	0.473175	0.313972	-0.293871	0	0.10983	0.711747	0	-2.50065	-2.11193	-3.49029	-0.0418235	-1.00074	0.307693	1.5227	-0.316908	0.214362	-0.305033	-0.0280938	3.00538	-0.176108
-0.904009	-0.377253	-0.930239	1.42125	-2.86188	-3.59284	0	0.219298	-0.0709471	-2.94139	0.547139	0.451915	1.28946	-0.0348663	-1.28381	1.06953	-0.0610757	-0.339664	0	-0.818	0	0.8799	0
-0.602713	-0.580694	-0.938974	0.299805	-1.29872	0	0	-0.219298	0.988709	0.248447	1.66497	1.58709	2.13484	0.027894	-1.36346	-0.76278	-0.152853	0.15369	0.107009	0.512034	0	2.12359	0
1.04254	-0.844778	0.626961	1.33811	0	1.84934	0	0.983077	2.08631	1.96567	-2.52913	3.69407	0	0	-1.48452	-0.923083	1.90908	-0.152136	0.533335	-0.204499	0.86726	0.726344	-0.176419
1.90386	2.21846	-1.25788	0.809006	1.94181	1.33866	0	-0.217628	0.137552	0.243013	0.864164	-0.140713	-0.396826	-0.125584	-1.89695	1.98935	-0.221609	0.434062	-1.06953	-0.204918	0.0139266	-2.23858	0.46976
2.26868	0	-1.91699	-0.161279	0.32	-1.63859	0.316957	-0.327333	1.22952	-1.71363	-2.65832	2.57167	1.83853	-0.440791	-1.41697	0	0	1.09993	0	0	0	0	1.79976
-0.609421	-0.970064	0.322061	1.06547	-0.32	-1.58822	-0.316957	-0.547947	-2.68334	0.492612	0.129227	4.50582	-1.4417	0.51058	-1.45075	-0.30349	1.84052	0.748394	1.17586	2.63173	-0.0278552	1.94013	1.03035
-1.62067	-0.995839	-0.969313	0.333358	-1.61554	-0.842809	0	-0.661524	0.417537	0.490197	-1.08203	5.33247	-0.198216	-0.300437	-1.4449	-1.99546	-0.473654	-0.634478	-0.532766	-1.20604	0	-1.0732	-0.743073
-0.0609273	0.44652	3.82212	1.35098	-1.31149	2.84386	0	1.10012	3.14448	1.21508	2.78928	11.7368	8.67358	0.118885	-1.54893	-0.622086	0.2889	0.555483	-0.106895	-0.303798	1.13575	1.83884	0.800004
1.17843	-0.0729306	-0.941922	0.0142745	-2.00007	1.99781	0	0.65431	-4.26181	1.20049	0.126877	-4.52502	2.86929	0	-1.43307	0.777005	0.663524	0.442781	1.1696	1.30984	0.563072	1.97195	0.793655
-0.310676	-0.944786	0	1.27643	0	0	-1.27797	0	0.908779	0	0	0	0	1.51902	0	0.463321	1.20151	1.04082	3.122	0.797611	-0.0136958	1.77069	0
0.0780112	-0.970323	1.87505	0	-0.337268	5.89801	0	1.83096	0.900595	1.18625	2.73076	-3.72342	-0.531759	0.398462	-1.4539	-1.24033	-0.250795	0.0636173	0.816331	-0.0993542	-2.29991	-1.39747	1.23458
-1.45392	-0.256485	0.309119	3.47608	-1.70362	-2.98919	3.16482	0	1.50585	0.938974	1.02292	3.42885	-0.773123	0.819397	-1.3744	0.311527	0.0873045	0.319718	-2.78225	0.495787	1.28118	0.701178	0.334076
-0.756306	0.537036	-2.50013	0.597098	1.02565	3.70197	-0.312013	-0.213675	-1.50585	-1.88685	-0.0610811	-0.71831	1.42267	0.805992	-0.621794	2.60951	-0.0254559	0.48806	-1.26185	-0.396433	-1.33725	-0.123381	0.499031
1.13944	0.869642	0.630917	-1.40339	0	4.85436	-0.941922	-0.75148	0.0689417	0.237812	-3.43933	-0.395325	-1.1246	0	-1.4906	0.1514	-2.97527	-0.107674	-0.317965	0.692729	-1.96848	-4.71865	-0.110681
-0.188329	0.440134	0.313972	0.642825	-0.682597	-1.7888	0	0.215285	1.23289	-0.954661	1.29845	-3.54389	-1.49928	0.491236	-0.79823	-0.454891	0.850656	-0.795171	-0.63898	-1.9921	0.014301	1.49864	-1.00168
0.833585	1.62946	-1.57981	-2.14973	0.682597	3.51573	0	-0.972455	-1.92446	1.90029	0.311624	1.19364	0.0604047	0.0335582	-1.51031	-0.304414	-1.52738	-0.652178	1.06271	-1.31647	0.314106	1.89439	-0.223964
1.48695	1.8707	0	-4.26868	0	-0.613912	0	1.18728	1.78822	0.235018	2.23576	-9.08144	-2.69294	0.294827	-1.85528	0	-1.76585	-0.265695	0.105652	0.101885	-0.557503	-5.39746	-0.674918
-0.394529	-0.0628437	-0.31898	-1.16977	1.35137	-3.27377	0	1.59663	0.20429	2.32029	1.1295	-0.930854	5.31526	0.180487	-1.67161	0	-0.856024	0.158596	-1.48939	-0.203874	0.628753	-1.41846	-0.0564493
1.44973	1.30374	-0.641028	-0.220864	0	-0.643044	0	-0.529382	1.88685	1.36676	0.0801925	1.94	0.176315	0.240144	-2.00212	0	0.0812898	-0.234206	-0.969313	-0.408999	0	-0.986998	-0.169539
-1.22958	0.0155111	-1.62078	0.470589	-0.673403	1.25287	0	-0.106213	-1.41179	-2.52018	-0.0400882	-1.23967	0.117371	0.252861	-1.4758	0.607905	0.212589	-0.976715	0.754721	-1.65293	0	1.29901	-2.75247
-0.291641	-2.21909	1.62078	-0.293859	1.3423	0.412611	-2.23295	-0.532766	-3.79487	0	-0.68397	-1.99807	-1.47713	-0.00664606	-1.56355	-0.30349	0.208285	-0.044311	-1.73352	-1.04713	-0.014246	-0.849167	0.464038
1.23562	1.48746	0.321028	-0.23571	0	1.51488	0.322061	0.532766	2.2254	1.38251	1.50258	-2.44011	1.76996	0.431078	-1.3219	1.80728	-0.0963744	0.31586	-0.878162	-0.527706	0.014246	2.13152	0.0578536
0.906274	-0.878782	0	-0.0737735	1.98026	-1.50677	1.27797	0.106213	0.137457	0.911168	0.574999	-0.155222	0.583092	0.218146	-1.74501	1.48151	-0.650056	-1.61491	0.987391	-1.27797	0.865192	-3.35077	-1.57392
-1.80239	-0.426474	1.58986	-1.2775	1.29872	-3.3337	0	1.37061	-0.62005	-0.682597	-0.495492	0.510747	-0.583092	0.763061	-2.43288	0.586512	-0.377264	0.330786	0	0.214133	0.267964	-5.46227	-0.294204
-0.489148	-1.15424	0	0.223998	-0.647251	-0.960289	0	-2.22349	-1.81316	-0.228572	2.97536	4.45015	2.88204	-0.183655	-1.18634	-2.66682	-0.179407	0.699691	0.109111	-0.859296	-0.0422625	1.52384	0.352942
-0.23468	-0.176296	-0.632914	1.21573	0.969313	1.471	0	-0.86022	-3.36347	-0.229095	-0.502708	-2.15836	0.170309	0.0721903	-1.28943	-0.602411	-0.803469	-0.296194	-0.218341	0	0.0140895	-0.949675	-0.884701
1.82967	-2.03369	0.947874	-0.962471	-0.322061	1.71858	0	0.107933	-0.730463	1.59275	1.06046	-4.22799	-0.968945	-0.229878	-1.27026	1.20122	0.580713	-1.04986	0.218341	-1.08461	0	-2.31671	-0.534602
-1.40184	-0.632264	-0.314961	-0.104205	-0.647251	-1.82004	0	-0.75799	0.875918	-1.82237	-1.00232	-2.87129	3.93088	0.64233	-1.26836	0	1.29827	-0.200561	1.19243	0.108992	0.0140875	1.9343	-0.11919
2.46925	0.139935	0.628933	0.445832	0.647251	0.947289	0	0.75799	1.37137	-3.98646	0.0968148	-1.72653	-0.996134	0.806876	-1.00798	-0.298954	-0.639252	-0.0988739	0.75148	0.217628	0.0140855	0.573067	-0.0596481
0.0170682	-0.900646	-0.628933	-0.759102	0.322061	3.05343	0	-1.30295	3.38299	-7.19021	-2.11234	-1.13072	-7.44503	0.94176	0.184027	0.448096	0.217417	-0.79139	0	-0.873368	-0.0422625	-1.05315	-0.658488
1.63377	-0.566008	-0.632914	-1.05138	0.641028	1.23382	0.632914	-0.438117	-1.95947	1.02303	-0.296942	0.536227	0.894727	-0.0706464	1.06073	-1.0487	0.348432	0.0353236	-2.71019	-0.549754	-0.0140915	2.18952	-0.0600781
0.140938	-0.183808	-0.636945	-0.0604138	-0.641028	1.7592	-0.315956	0.219298	1.40353	0.25413	-0.876151	1.71861	1.18065	0.359136	0.652768	1.79109	0.0386399	0.0564919	0.984152	0.549754	1.95373	-0.0470921	-0.0601142
0.456444	0.650165	0.31898	1.58876	-1.62078	0.538618	-0.316957	1.08934	0.970881	3.00023	1.56765	2.2642	0.87643	-0.410546	0.810013	-0.444775	2.84874	-0.111445	1.18985	0	1.09952	-0.756505	0.24024
0.185328	1.62351	0	-0.566658	0.326265	-1.04657	0	0.432433	-2.58665	1.95128	-2.89644	-3.65755	-2.89191	-0.141516	1.14083	1.1817	-0.629016	-0.140661	1.38817	-0.109709	-0.273748	0.615095	0.895796
-2.98569	0.375327	0	0.715247	0	0.698188	0	0	0.0707965	1.20049	0.485242	-0.226959	-2.85473	-0.115935	1.21555	0.439561	-0.0188939	0.798115	-1.8192	0.328767	0.0548095	3.8404	0.474497
1.44987	-0.244619	0	0	1.29452	1.63263	-0.317965	-0.324149	0.985923	-0.238949	2.68646	2.32477	1.89203	0.0322175	2.09659	1.01819	1.36623	0.856014	1.7131	1.19632	-0.274349	0.362483	1.64323
2.63357	-2.17884	-0.960007	-0.208086	-0.322061	0.559364	0	-0.108284	0.976298	0.71514	0.723861	1.03857	0.362101	-0.051553	1.36242	0.289018	0.739107	-0.333921	0.317965	0.4315	0.547947	0.721049	-0.349855
-0.617214	0.133411	0.641028	-0.22343	0.963089	-1.71743	0	2.67253	-0.0694203	-0.71514	-1.35416	-1.65244	-0.604231	0.0579953	0.657509	-0.289018	1.54586	0.336242	3.73875	0.750674	0.0273187	2.30814	0.408045
-0.124186	0.257979	0.953902	-1.3814	2.83484	-4.61008	0	0.52604	0.760986	2.36418	1.60725	2.07905	1.50379	0.276625	1.21922	-1.1645	-0.0327982	0.513795	1.51748	0.532766	-0.534065	2.42751	0.811128
-1.797	-1.31344	0	-0.667478	1.54086	0.525669	0	-0.52604	-1.45785	-0.938974	0.832612	-0.16569	1.65782	-0.3862	1.25373	0.292398	3.76269	0.324964	0.999009	0.424179	0.233148	1.61431	0.40311
0.586913	0.0336785	-0.316957	0.364631	-2.16392	0.262377	0	-0.528822	-0.913248	-0.472814	0.0192808	0.508035	0.293169	0.128899	1.96419	-0.585653	-1.785	-1.64172	-2.10957	-1.81532	-0.274349	-0.846387	-2.4434
0.112751	0.0589102	-0.317965	0	1.55042	-1.6501	0	0	0.141044	-0.952388	0.346421	1.14247	-0.293169	-0.116002	1.80013	-1.1817	-0.674079	-0.163868	-1.22576	-0.648651	0	-0.982284	0.117716
2.62233	1.63555	0	-0.501711	0.918843	1.15815	0	0.211864	0.281492	0.477328	-1.4709	-0.601831	0.293169	-0.187175	1.36419	1.32843	-0.216092	0.624379	-2.287	-0.108519	0.0274688	0.769563	1.34387
-0.312048	-0.856162	-0.960007	-0.565535	0.607905	2.08359	0	-0.850165	-0.776018	-1.43887	0.66071	2.22553	1.10627	-0.0646245	1.57605	-0.293686	-0.180434	-0.470648	2.59485	-0.217391	-0.0274688	-0.0425985	-1.34387
-0.39014	-0.025047	2.22585	3.90792	0	-1.46071	0	0	-0.782087	2.38675	0.540855	-0.402022	-1.45818	-0.0646663	1.32493	0.146951	0.773566	-0.590461	-1.13345	-0.655024	-0.0274763	1.05956	-0.117716
-1.63954	-0.82167	0.313972	-0.41359	1.20483	-1.15092	0	-0.535047	2.53713	0.470589	0.786726	2.6856	2.49505	-0.00646893	1.82886	1.45775	0.493387	0.0109807	-0.207469	0.980934	0	1.13185	-0.294898
-0.0698381	0.294229	0	-0.237107	0.894194	0.987802	0	0	-0.628274	-0.470589	-0.671208	0.84238	-0.344432	-0.116512	1.41595	0.577202	-0.371602	0.107391	1.03307	-0.652886	0	-1.0897	-0.0590842
1.55732	0.0839067	-0.628933	-1.2992	-0.297177	0.586888	0	-0.537925	-0.421053	0	0.843078	0.934457	0.687682	0.465237	0.961966	1.00216	-0.326288	-0.300514	-0.308801	1.19372	0.0274763	-0.973965	-0.0591191
-0.667438	1.00973	-0.632914	0.120174	-3.94588	0.163303	0	0.645164	3.11552	-0.472814	2.84041	0.712918	1.81103	-0.122561	0.217344	-0.142552	-2.3327	-0.22657	0.205973	-1.08461	0.575265	-1.45738	-1.12996
0.300709	-0.783533	0.316957	0.732933	0.617286	0.518967	0	-0.107239	0.814668	-0.47506	0.351755	-0.361308	0.280034	1.27627	-0.0144749	3.22835	0.564538	0.498092	-0.412372	0.108992	4.51285	0.817033	0.358209
-0.91917	-0.958554	-0.953902	-0.283561	-0.617286	-0.0976696	0	-0.107354	0.202634	-1.68071	0.460958	0.884527	0.0559128	0.267295	0.317965	0.825314	-0.32587	-0.516208	0.925456	-0.327333	-3.42617	5.17429	-0.6577
1.27176	-1.65265	0.636945	-0.43436	0.617286	-1.61393	0	0.85562	-0.881063	0.483093	-0.0736106	-2.52676	-1.23736	0.866957	0.17301	0.818558	1.19574	0.569484	2.52666	1.73352	-0.0270234	3.90799	2.54678
-2.91342	2.41855	0.947874	1.07496	2.13098	1.83865	0	1.05933	-2.20243	4.4766	0.422523	2.89031	0.113122	0	-0.201875	-1.50585	-0.0108721	-0.0188001	0	0	-0.270636	-1.4179	0.175285
0.132832	-1.41858	-0.947874	-0.371941	-2.13098	1.02975	0	-1.48623	0.831606	-0.230681	1.96049	1.73432	1.23597	0.471447	-0.477466	2.04785	-0.486831	-0.681534	-0.701054	-0.971405	0.270636	0.9475	-1.76683
2.47763	0.694918	0	0.178704	-0.617286	1.94681	0	1.27526	1.09816	1.14812	3.02758	2.57489	2.20881	-0.263736	-0.421482	-0.135227	1.05062	0.47607	-0.100553	-0.32591	-0.0540687	1.52079	2.11648
1.37385	-0.890704	0.632914	-1.04697	1.84054	0.140758	0	-0.317293	0.815776	-0.228572	-0.26194	-0.3586	-0.218699	-0.018865	-0.452522	-1.77479	-2.10135	0.0470902	0.601807	0.758811	0	-2.07241	-1.34702
1.76324	0.272294	0	0.927873	0.606062	0.225021	0	0.528263	0.876312	0.228572	-0.649068	0.70041	-1.0454	-0.0188685	-0.60166	-0.968866	0.480973	0.837629	0.548493	0.21575	-0.108225	0.35496	1.34702
-0.0439792	0.46628	-1.58986	-0.52274	-0.302572	0.185125	0	-1.59324	0.0670916	0	0.596598	-2.89541	1.37327	0.251288	-0.694191	-0.557882	-0.698353	-0.0825134	1.03884	0.644471	0.0541272	-3.20027	-1.22916
1.38066	0.464116	-0.643089	1.0724	0	0.534825	0	0.213904	0.401607	0.909097	-0.71987	1.07983	0.109051	0	-0.699044	-1.55042	-0.358417	-0.60771	-1.58733	0.320684	0.0270526	-1.55677	-0.649928
-0.838226	0.117796	0	0	0.904984	-1.16499	1.57981	0	0.599402	-1.59639	0.0352361	-2.20912	-0.272851	0.156735	-0.478756	0	1.57189	0.212102	-0.702461	-0.427808	-0.189522	3.08968	0.826451
-1.702	-0.768163	0	0	0.29985	0.688155	-0.944889	-1.94181	0.199005	0.915338	-1.95666	-2.4519	-2.04258	-0.225776	-0.465991	-0.427047	-2.07286	0.0179806	-0.606062	-0.753097	-0.0135511	-5.85251	0.0587717
-0.285963	0.313042	0	-0.475201	0.597017	0.867956	0	0.975617	0	-1.83913	-0.703022	-1.38301	0.611623	-0.52249	-0.604505	-0.572248	0.241524	-0.0500411	-0.609758	1.1809	0.0135511	-0.76694	-0.0587717
0.374464	-0.00844773	0	0.223032	-2.10534	1.54508	0.630917	0	0.923489	0.23175	-0.253577	-0.893239	0.332042	0	-0.837207	0.286533	-0.49855	0.130523	0.203666	-0.6424	0	-2.9516	0.469209
-0.48703	-1.6611	2.23295	0.415	-2.15062	0.287862	0.313972	1.28619	0.654453	1.37933	1.92193	0.826103	1.53512	-0.970358	-0.905956	-0.717878	0.606119	0.576326	1.41416	0.6424	0	1.96299	0.350468
-1.76308	-0.750101	0.628933	-0.0591804	-1.56498	0.0723681	2.17063	0	-2.17615	-1.14812	0	-0.493717	0	-0.127543	-0.649956	-1.30531	0.793904	-0.159325	0.300451	-0.213675	-0.325733	0.731658	-1.2911
0.624738	0.405925	0	1.78943	-0.632914	-0.038306	0	1.16465	-0.668899	0.46083	1.11456	1.49052	0.108755	-0.0829902	-0.669837	0.727276	1.17371	-0.246872	-0.601807	-0.859296	0.027185	1.785	0.471421
0.648457	-0.518494	0	-0.90538	0.316957	-0.0915683	0	0.838579	2.12491	0.687288	1.81316	-0.0831509	0.108637	-0.640699	-0.501411	1.43887	0.659399	0.541231	0.701757	1.17964	-0.272183	-0.253058	0.761351
-0.498873	-0.104022	0	1.1522	0	0	3.31855	0	0.524248	0	0	0	0	0	0	0	0.205624	0.127881	0.398804	-0.534475	0.0272517	0.757261	0
-0.365416	0.536287	0	0	-1.59493	-0.516907	0	0	0.456473	-2.30957	1.81481	1.04268	0.811034	-0.205894	-0.93112	-0.716849	0.614347	-0.175199	-0.398804	0.214133	-0.820798	0.876284	-0.761351
-1.85747	-0.319696	-1.89879	1.12474	-0.322061	0.608476	-3.31855	0	-0.195376	-1.41179	-1.43543	0.148071	-0.215634	0	-0.285805	1.1445	-0.928365	0.567893	0.199601	1.3808	2.12022	-3.94035	0.352113
-1.36554	1.14444	-0.963089	-0.632914	0.322061	-0.944185	3.31855	-0.313644	-2.04156	0.236687	-0.241255	-1.61869	0.161769	0.993375	0.111244	-0.570615	-2.03414	-0.140512	0.893306	0.735684	0	-1.91978	-1.23786
2.55656	1.42714	0.643089	0.847767	-1.94811	0.152442	-0.297177	-0.104767	0.132979	2.33655	-1.23255	-1.44735	-1.24697	0.070124	0.047638	0.142959	-0.673727	-0.793498	0.197433	-1.05264	0	1.48669	-1.55413
-2.35409	-1.55556	0.63898	1.80083	1.30295	-2.13043	0.888895	-0.736458	0	-0.695252	0.261666	-0.356628	-1.70568	0.178276	0.427723	0.142755	0.0631231	-0.38935	-0.395257	-0.530505	0.563231	-3.62391	-1.63988
-0.519664	0.487118	4.05672	-0.719275	-0.324149	1.48687	-0.295421	1.15487	-0.666669	1.84337	1.64151	0.576762	2.62885	-0.324955	1.03791	-2.89456	1.0854	0.298975	0.592302	-0.640344	-0.563231	1.60718	0.4887
-1.96293	-0.324482	-2.16392	0	0	-0.462075	2.33929	0.312663	0.400535	-0.457667	-1.50223	-2.03914	-2.62885	-0.249209	0.670463	-0.736923	-0.113893	-0.624726	-0.0984737	-0.644471	-3.55909	0.837932	-0.856798
-3.02399	-0.282643	0.312013	0	-1.96728	0.123573	0	1.24097	-0.937089	0	0.312663	0.79668	1.43253	-0.121635	0.0466092	0.14782	-4.32327	-0.88629	-2.29208	-1.08343	-0.279096	-4.67501	-1.29912
-1.58143	-0.809512	0	-0.155818	-0.664454	-2.56317	0	-0.618559	-2.72682	-1.3857	-3.29691	-2.84303	-3.28081	0	1.4189	-1.48812	0.0690687	-0.0356155	0.502766	-1.20549	-0.0279525	-0.553762	-0.812758
-1.24471	-1.85894	-0.312013	0.311394	-2.36099	-2.62946	0	-1.03951	-1.39181	-0.934586	1.2646	1.87356	1.73722	-1.10142	0.275272	-0.752449	0.191608	-0.720568	1.59207	-0.774769	0.0279525	2.15161	-1.13638
0.973981	0.0968523	0.312013	2.01462	-1.02917	-0.391001	0	-0.313972	-1.76745	-0.470589	1.14388	0.918069	1.87127	-0.0518269	-0.474551	0	0.103316	-0.490757	-0.395648	-0.892863	0	-0.818558	0.0634719
1.07234	-1.76681	-1.25393	-0.806568	-1.03987	-1.11505	0	-0.736458	-0.715823	-1.66472	1.20012	0.614966	1.13853	-0.279031	-0.307362	-0.758154	1.48432	-0.0232388	-0.198413	-0.900907	-0.279877	2.61394	-0.0634719
-2.07433	-1.04449	-0.315956	-0.925803	0.694447	-0.862049	-0.579712	-0.635595	-1.30154	-0.722025	-1.25263	-1.5388	-0.161856	-0.162586	-0.169452	0.606982	-0.120655	-0.814354	-0.0993542	-0.113186	0.028023	-1.52401	-0.764822
1.06478	1.43784	0.630917	-0.0845904	0	-0.601187	0	0.106213	0.145455	1.43887	-0.932203	-2.75863	-1.52342	0.435136	-0.339769	0.151172	0.979866	0.783093	0.19861	-0.681821	0.0140085	0.225581	0.70131
-0.323229	0.320684	-0.314961	1.52568	3.40169	-1.89261	0	-0.960007	-0.510019	0.47506	0.721898	1.564	0.273748	0.0583072	0	0.452148	1.02954	0.456715	1.18345	0.227791	0.0280112	0.539327	0.633314
-0.403799	0.142197	-0.315956	1.57115	0.998344	-1.4078	0	0	-0.806752	0.236687	0.507482	-1.48699	-0.493287	-1.15955	-2.28456	-0.150489	1.38075	0.127603	0.781254	0.340716	0.0140027	3.73916	1.12996
1.89335	0.778489	0.944889	0.762843	0.660068	-2.48715	-1.75958	-0.645164	0.879771	0.706717	-0.20968	0.672767	1.09291	-0.0786576	-0.746687	1.0487	0.280423	0.655381	-1.27266	2.24225	-0.0280073	2.13592	0.684295
-1.06281	-0.0969804	0	-0.844922	-0.660068	-0.640976	0	-0.75799	4.35628	-0.470589	0.558173	1.41913	0.704038	-0.0196741	-0.527621	-0.149142	0.457185	-0.204494	0.0984737	1.32161	0.586512	-0.636	-0.310463
0.980066	0.84322	0.312989	-0.164361	-1.66949	-1.22206	0	0	1.18098	0.938974	1.03825	2.68895	0.377054	-0.414052	0	-0.598804	1.32343	0.342964	1.46559	0.65431	1.3553	2.39558	0.805207
-0.854226	-0.526179	0.623055	0.954987	-0.675678	-1.38245	0	-0.54496	1.43986	0.930239	0.429443	0.394367	0.16116	-1.27255	-0.998881	-0.451468	0.644555	0.0956299	0.193799	-0.32662	0.602576	0.24886	-0.0617094
-3.21551	-0.936403	0	2.70576	-0.339559	-0.403504	0	-0.109349	-0.751626	-0.696867	-0.154387	0.71713	1.12091	-0.374232	-0.226941	0.601506	0.594566	0.660583	-0.485202	-0.546748	-0.547646	0.495869	1.28797
0	0	0	-0.251406	0	0	0	0	0	0	0	0	0	-0.429416	0	0	0	0	0	0	0	0	0
0.616729	0.883632	0.619197	0	-0.340716	-1.52027	-2.39532	1.4123	0	-0.701757	2.20722	1.67736	3.85264	-0.242359	-0.0486973	0	0	0.642993	0	0	0	0	0.728601
0.217739	1.12847	0.308167	-0.464777	0	-1.12638	0	-0.432433	1.9695	1.62984	0.201309	0.14263	-0.358148	-1.68574	-0.0162377	1.93028	1.64136	0.277974	2.59256	0.764613	1.03798	-0.165017	0.963283
1.86939	0.0608722	-0.617286	1.95077	0	2.60918	0	-0.979866	0.402685	0	0.284495	0.355687	1.12132	0.430932	0.227088	-0.294551	0.71251	0.620891	0.189394	0.650762	1.12141	1.96245	0.894727
-0.394154	0.736221	0	-0.326862	0	0.733877	0	0.545555	0.93334	-0.231214	1.03077	-0.0819695	1.00858	6.28905	0.822917	0.441502	-0.64658	0.721452	-0.0946522	0.215983	-2.98652	3.26592	1.00444
0	0	0	-0.157274	0	0	0	0	0	0	0	0	0	-0.443232	0	0	0	0	0	0	0	0	0
1.66686	2.51387	1.23078	0	-0.684934	-0.178467	0	0.542595	1.05612	1.37933	-0.14897	-2.07696	-0.503019	0.366289	0.832138	0.439561	-0.643805	0.736849	2.89334	0.966191	-0.0415369	-1.10324	0.819677
-1.80914	-0.760267	0	-1.36021	0.684934	2.00254	0	0.431966	0.0656383	0.909097	2.03319	1.67159	2.34249	-0.192616	1.39265	-0.146306	-0.83791	0.240363	-0.0920387	1.58986	0	-1.63774	0.174774
0.0843366	0.507486	-0.613499	0.636185	0.680275	-0.379862	0	0.107701	-0.262812	-0.453516	0.598756	0.531028	-0.74166	-0.2574	0.922963	0.583943	0.628216	0.123	1.2809	0.837701	0.0138475	1.87518	0.116347
-0.110706	-0.609294	0	1.3386	0.33841	-0.569332	0	0.215054	-0.925321	-0.913248	-0.793719	-0.805859	-0.198708	-0.828162	2.20229	-3.25473	-0.945575	0.112239	-0.455582	0.727276	0.0276893	-0.993057	0.290276
0.667647	-2.19695	-1.23841	-1.44435	1.00841	0.540247	0	-0.430571	-1.67396	-0.690452	0.389548	0.346164	-0.548493	-0.979312	1.09075	-1.05821	0.0211887	-0.0371461	-0.457667	0.516263	-0.0276893	0.0798085	-1.28356
-0.0980277	0.501992	0.62112	0.13217	0.33389	-1.62058	0	0.323102	-0.135135	1.14812	1.9094	2.12202	0.697561	-0.55923	1.36179	-0.916037	-0.289968	-0.571817	1.63789	0	0	1.26835	-0.470866
1.96721	-0.562748	0.617286	0.105611	-0.33389	0.292649	0	-1.62605	-0.406505	0.455582	1.07494	0.0214777	0.495296	-1.83772	1.73866	0.611623	0.751472	0.57485	-1.18022	-0.10304	-0.30509	1.87286	0.117925
-0.566767	-0.758207	0	1.72666	0.666669	-0.1873	0	-0.547947	-2.82291	-0.227531	0.329645	0.171655	-0.0494193	-1.35992	0	-1.07281	-0.140692	0.162124	-1.56469	1.12764	-0.543139	-2.4654	0
-0.217968	-0.18388	-1.23841	3.62935	0	-0.0462374	0	1.31006	0	-3.24102	0.640477	1.05031	0.542274	-0.656099	3.85407	0.461185	-0.40206	0.751869	1.83829	1.01421	-0.546105	0.828571	0.646111
1.46483	0.0350508	0	-1.32185	0	0	2.09903	0	-1.83233	0	0	0	0	-0.315913	1.07641	0.459067	1.5012	0.741038	2.78419	1.10387	1.64326	1.05532	0
-0.316153	-0.977249	0.62112	-0.31732	-0.332779	2.73083	1.76475	0.756352	-1.93902	-0.945634	-0.624807	-0.425193	-1.0875	-0.25483	1.47681	0.304878	-2.04692	-0.434226	-2.1487	-0.751318	0.275862	-2.47995	0.292312
2.55163	2.08377	1.53613	0.469276	0	-0.387017	0	0.215054	-1.46095	1.18065	0.156568	1.32803	-0.298656	1.00179	0.7643	1.66042	-0.591591	0.0434327	-0.0905387	0.751318	0.247627	-1.08196	-0.350878
-0.246044	-0.643257	-0.305344	0.668393	1.32452	3.48373	0.581397	0.85562	-2.38284	0.934586	0.0625587	1.23278	-0.199601	1.04592	0.163021	1.19049	0.538278	-0.471278	0.271371	0.0997506	0.821023	0.482316	-0.293341
-2.32045	-0.533381	0.913248	0.925817	3.55449	1.16274	0	0.42508	1.19852	-0.70012	-0.910953	-0.656287	-0.149963	-0.311274	-0.367173	-0.742394	-0.466816	0.303433	0.450654	0.794443	-1.34451	1.98498	-0.176419
0.455563	0.898981	0	-0.0124541	-0.636945	1.26063	0	0.844778	-0.597463	0.70012	0.440807	1.75602	0.0500125	0.223403	-0.0136249	0.890214	0.367221	0.032242	-1.81493	0.591718	1.08525	0.313972	-0.0588755
-0.531949	-1.07448	-0.30349	-1.37951	0	0.0650399	0	0.105097	0.299177	-0.70012	1.23333	1.15886	1.63654	0.114892	0.557105	0.589103	-2.04933	0.256815	-0.458927	-1.88591	-0.83694	0.702853	-0.531445
1.33169	1.49068	1.80728	0.227043	3.7622	-0.100534	0	0.523836	-0.374112	2.77154	1.9057	0.531526	0.490678	-0.250228	-0.0406587	0.439561	3.26609	1.14425	1.09791	1.78754	0.247695	5.48861	2.91736
-0.105318	0.397237	-0.598804	-0.302839	0.30722	0.972699	4.80998	0	0.821207	0.227531	-0.106618	-0.765278	-0.343222	-0.42071	0	0.728335	-0.144247	0.483784	0.0909504	0.392928	0.0274839	0.807048	0.972826
1.57522	0.841062	0.29985	-1.55378	-4.71045	0.0328076	0.275862	-0.734141	0.814518	1.57839	0.985678	1.69496	1.36587	0.298751	0.0813008	-1.90482	-0.823719	-0.491916	-1.18886	-0.294551	0	-0.256082	-0.972826
-2.08769	-0.22245	0.894194	-2.70603	1.59493	1.4249	0	0.629593	1.89925	1.77388	-0.848619	-0.205293	-1.71028	0.108416	0.0135437	1.46846	-0.0213015	-1.05464	-0.184162	-0.591718	0.957207	1.12913	-1.74018
1.48546	-1.70176	1.47278	-1.74264	1.25788	-2.02652	0	0.937019	0.289018	1.74296	-1.64177	-2.21984	-1.0902	-0.101636	0.0135419	-1.46846	-0.448383	0.14559	-0.184502	-0.694792	1.78046	-3.35145	0
1.02124	0.226264	0	0.241255	0	0.501991	0.275103	-0.415369	-3.22609	-1.08579	0.278078	0.699643	-0.149589	0.297841	0.0270783	0	0.983097	0.0984333	-2.99929	-0.0996512	0.0133681	1.85534	0.815855
1.2368	-0.470507	-0.292826	1.21085	-1.25788	0.0328296	2.44246	-1.15124	0.964042	0	1.68277	-0.858638	0.597017	0.0540577	0.310874	2.04985	-0.01766	0.0975919	-1.14834	-0.700353	0.280318	2.89875	-0.582074
2.09151	-0.490283	-0.293686	-1.2912	0.315956	-1.10807	0	-0.633582	1.39247	-0.877199	-0.639174	-0.928224	-2.7151	0.06078	0.51151	0.43384	-1.0475	-0.927609	0.767022	0.100351	-0.266952	-4.11941	-2.66209
-0.638971	-0.184478	-0.886269	-0.888177	0.314961	-2.21852	0	-0.851069	1.37335	-1.3304	-2.03585	-1.74026	-1.69626	-0.114838	0.482187	0.575541	1.76902	0.330886	-0.574714	-0.200803	-0.818632	2.28119	0.538118
-0.0580274	1.36235	1.17995	-0.365631	-0.314961	1.57518	0	1.79994	-0.143678	1.3304	-1.09667	-1.99133	-1.09462	0.101334	0.718949	-1.44511	-1.36292	-0.569413	-2.62789	-0.80727	-0.554018	-2.65404	-0.838328
-1.19166	0.441387	0.584797	-0.176523	0.628933	-0.544296	4.96834	-0.52604	1.00144	3.25056	-2.50432	-2.44426	-3.14106	-0.0540322	0.331104	-0.437637	-2.82674	-0.37436	-1.9921	-0.609758	-0.761701	-1.58136	-1.51472
1.00332	-0.0950365	0.291121	0.825612	1.24612	0.918199	0	0.421053	-2.88829	-1.07182	-0.990187	-0.752299	-2.07658	-0.304476	-0.331104	-0.733679	-0.47654	-0.480566	-0.909557	-0.613499	-0.0273112	-0.266008	-0.183318
0.0227742	-0.294322	-1.75958	0.0673718	-0.933133	0.20185	0	-0.526594	-0.0732869	-1.52012	-3.48583	-2.46204	-1.55818	0.0406504	-0.879419	0.587373	-1.36142	-0.216021	-1.6377	-0.617286	-2.19546	-1.3022	-0.613499
-2.54474	-0.303886	2.04985	0	-0.941922	0.539429	0	2.1933	0.365899	3.22956	0.354102	-1.43871	-0.731779	-0.0406504	-0.563684	0.146306	1.12966	0.8696	1.6377	-0.413651	0.264901	0.997323	1.58733
1.53235	0.675971	0.289436	-0.175261	2.49234	-0.911387	-3.37256	1.5377	-1.3976	-0.851069	-0.134748	-0.0577501	0	0.0338765	-0.391073	0.583092	2.28296	0.368449	0.808902	0.413651	0.555403	2.63669	0.181543
2.57237	0.250162	1.71924	-0.162053	-0.308167	0.237832	0	0	-0.892863	-1.07412	2.28286	1.51922	2.06885	0.0541785	-0.705088	0	2.50271	1.35878	0	0.309119	0.290356	4.71957	1.02257
2.48087	-0.51827	-1.71924	-1.05979	-2.50013	-0.135495	0	0.810541	1.48371	1.28757	1.27682	1.35626	0.496827	0.304208	0	0.435099	0.31198	0.287459	2.38817	2.7399	0.0276091	0.353983	0
0.170161	-2.1977	0	-0.410622	-0.634923	1.54605	10.0335	-0.607289	-1.70817	-0.856536	0.66467	0.531812	1.04082	0	-1.9234	1.15109	0.669739	0.331624	1.94748	0.598804	1.91393	-1.6388	0.119617
-0.0371688	-0.45251	0	0.765136	0	0	0	0	0.0748783	0	0	0	0	-0.0270033	-0.947742	0.142959	-1.60508	-0.601278	-0.289715	0.198807	-0.556726	-2.39924	0
0.592588	0.222074	-0.579712	0	-0.31898	-2.46487	0	0.50633	0	-1.7354	0.0323102	-0.223576	-0.656099	-0.0810537	-0.886144	0.142755	-0.407102	-0.875444	0	-0.697561	-0.0272368	0.147059	-1.32373
1.06648	-0.4803	0	2.40716	-0.641028	-2.91447	0	0.704583	0	-0.438597	-0.291168	0.0279744	-0.164699	0.0405351	-0.865561	-2.01736	0.428296	-0.483841	-0.581961	-0.2002	0.813895	1.71193	0.603867
-0.783245	0.799223	0.290276	1.6734	-2.60601	1.57192	0.238379	-0.200803	2.14744	0.657177	1.59103	0.902161	1.47262	0	-0.557343	0.145455	0.682885	-0.0541557	0.485202	-0.804833	0.0270161	-0.108401	0.180451
1.743	0.132585	0	-1.05084	0	0.689838	-0.238379	0.401204	-0.587805	0.869571	1.26744	2.71802	1.82408	0.168719	-0.661397	-0.875918	-0.905653	-0.0571962	0.77146	0	0	-0.471101	-0.602775
0.736516	0.642749	0.578036	2.70956	0.657897	-0.551246	0	-0.401204	-0.221321	2.14141	0.45551	0.789966	0.952388	-0.364791	-0.709377	-0.146735	0.219236	0.330683	1.99721	0.704583	0	1.15566	0.181214
0.471169	-0.563283	2.2793	0.933809	0.978801	-0.34684	-0.95924	0.800805	-4.30093	0.633582	-1.3728	-1.29298	-0.686925	0.121745	-0.378458	0.731532	-1.30837	-1.08102	0	-0.301356	-0.840911	-0.576163	-1.39777
-0.275887	0.0882223	0	0.178094	2.24729	0.450051	3.08447	0.695482	3.63401	4.32611	-2.42836	-2.75978	-3.83727	-0.413182	-0.306726	-0.584797	-1.31484	0.0674807	-1.99721	-1.52056	1.35283	-0.398046	0.549284
1.58356	1.60087	1.12046	0.885745	0	-2.40247	0	1.47423	3.14698	2.97937	-0.735237	7.12571	-0.386421	-0.886289	-0.39575	-1.32843	-0.116102	-1.06757	-2.92418	-1.0267	0	-2.42214	-0.671758
2.41572	-0.897883	-0.27894	-1.01292	1.26185	-1.79747	0	0.194932	-1.59771	-2.37635	0.343784	-8.67047	-0.055325	-0.404845	-0.58919	-0.148699	-0.334546	1.12289	-1.79646	-0.103252	-0.296057	-0.0743218	0.671758
4.60142	-0.57961	0.557105	0.431747	-1.57981	1.22523	0	0.582526	1.09211	1.78754	2.10228	1.53361	-0.722025	-0.130723	-0.251461	-0.14892	0.156503	0.0757249	-1.01215	-1.14287	1.0724	-0.14881	0
0.438137	0.413097	0.277393	4.02339	0	1.44236	0	-0.193799	-0.799713	-0.394478	0.0799808	-0.0334541	0.278319	-0.199855	0.207131	0.742394	1.32227	1.28759	1.31381	0.936044	-1.0724	1.84439	2.46481
0.0282672	0.0613793	-0.555557	-3.44221	-0.31898	-0.492925	0	-1.07266	-4.86077	-1.99607	-2.34582	0.0390287	0	-0.1657	-0.0295639	0.14782	-0.807183	-0.89173	-1.61947	-0.727276	-0.256393	-0.660068	-2.28238
1.94786	-0.536147	1.93109	0.565293	-1.28619	-1.82973	-1.41179	-0.0980873	0.839379	0.402415	-1.58393	-2.3577	-0.837292	-0.394642	-0.177567	-0.295858	-1.60476	-0.368617	0.508907	-0.52274	0.0135108	-2.38284	0.182094
-1.16489	0.211286	-0.82305	2.79168	0.323102	0.854041	0	-3.08943	-0.380663	-2.02847	3.0948	0.0570581	0.614699	-0.563499	-0.698524	-0.445435	2.00556	0.0325352	-0.101574	-0.525487	0.0135089	4.35011	1.02565
2.99628	-0.431852	-0.552488	-0.794965	-0.647251	-1.03078	0	0.202225	0.684153	0.204708	-1.08617	-0.136994	-0.951588	-0.11867	-0.568353	-0.746829	-0.890439	-0.228727	0.203046	0.943898	-0.841025	-1.34376	-0.965026
-0.168559	0.835574	-0.834497	-1.5343	0	-0.414037	0	0.804833	-2.06666	-0.82136	-1.08162	0.216821	2.49944	0.055862	-0.435927	-0.601506	0.569203	0.544449	0.707431	0.935072	0.556953	1.45193	0.664454
0.625435	-0.430108	-0.84152	-0.362251	0	0.749578	0	-1.71808	0.693644	-4.42643	0.329002	1.77386	0.601588	-0.307628	-0.680223	0.900907	0.540815	-0.0829882	1.40002	-0.31072	0	-0.288705	-0.301477
-0.34453	-1.47993	-0.848661	0.598879	-2.29895	-0.326697	-2.3982	0.913248	-0.0768344	2.76319	0.442442	0.134296	0.48953	-0.0700476	-0.623813	-1.20302	-0.942909	-0.630692	-2.00609	-0.520022	0.0135455	-1.49284	-0.909924
-0.00669783	-0.196604	0	0.0746083	-1.67508	-0.32143	0	0.904984	-0.771609	-1.90482	1.83075	1.4324	0.864403	-0.689076	-0.842981	-0.1514	-0.338139	-0.161149	0	-0.942909	-0.27126	-0.0366905	-0.795354
-2.85067	0.792983	-2.29895	0	-3.08772	-0.205547	0	-2.7399	1.53731	-3.7001	-0.450524	-0.974915	0.214938	-0.339247	-1.05215	-1.52675	-0.654063	0.355399	1.20847	0.629593	0.0135805	-1.06992	0.367873
1.40292	0.23933	-0.875918	-3.01581	-2.46926	-0.286185	0	0.410678	-2.31492	0.662986	2.16949	1.89127	1.43887	-0.212615	-1.0319	-0.308167	-1.40286	-0.492428	-1.71635	-1.1573	0	-0.185632	-0.984018
1.6422	-0.177226	0	2.30477	0.356507	-0.0879278	0	0.204708	0.932408	0	2.6934	3.55734	4.70249	-1.11295	-0.947425	-2.02657	0.533928	0.892636	0.609139	0.211417	0	0.037154	1.83716
0.483299	-0.248646	0	-0.615309	-1.43372	-0.654876	0	0.102197	0.693644	0.439561	-1.31428	-0.422588	-1.16782	-1.0167	-1.13284	0.784318	-1.61041	0.215704	-0.40568	0.316289	0.0543036	-2.02634	-0.486619
3.04401	-1.55917	0.292826	-0.669829	0.719428	-0.513333	0	-0.204499	-1.54802	1.09052	2.38381	1.21016	1.21829	-0.946632	-1.56872	-1.57484	-0.523729	1.58681	0.203046	0.420169	-1.36651	-1.83632	1.15188
0.266888	0.306583	0	-0.292082	-1.08109	1.6756	0	0	-1.09805	-1.31006	-0.472238	-1.00921	-0.708864	-0.33712	-1.26304	-1.27797	-0.937477	0.500765	-1.01938	-0.420169	-1.35755	0.0386026	0.959815
-2.8607	1.38587	-0.881063	-0.0508841	0.361664	-0.28962	-28.4451	-0.513085	0.550532	-1.10498	-0.428463	-0.0475574	-0.152555	0.0073408	-1.21234	0.641028	0.767335	-0.925826	0.408999	-0.105319	0.0278901	0.346754	-1.20122
1.12654	-0.525263	0.294551	0.216079	-0.361664	2.29256	0	-0.205973	-2.46142	-0.892863	-1.40532	0.369296	0	-0.0146821	0	-0.801929	0.407856	-0.93523	-0.306592	-1.05933	0.639335	0.995033	-1.46077
-2.16155	0	3.46856	-1.62564	-1.45988	0.247105	0	2.14185	0.960007	1.33632	0.882564	2.02775	0.25413	0	-3.0709	0.481929	0.687314	-0.520018	-0.719058	-0.32	0.0277047	1.28643	0.0612933
0	0	0	0.937647	0	0	0	0	0	0	0	0	0	-0.847869	-2.30055	0	0	0	0	0	0	0	0
0	-0.366645	-0.855925	0	4.66871	-1.02969	0	-0.505818	1.18719	-0.665929	-2.84572	-2.60339	-1.48302	-0.0888889	-1.27752	0	0	1.15468	0	0	0	0	1.70113
-1.25289	0.891907	0.286123	-0.628409	2.42646	-0.536484	0	0.202634	-0.236314	2.42036	0.569352	0.0476556	0.462607	-0.326604	-0.716849	-5.26437	1.235	-0.647445	-2.50535	-0.966191	0.027697	1.23297	-1.09026
-0.195904	0.363395	-1.43887	1.3164	0.341881	0.250382	0	-2.14842	-1.50976	-0.435731	-0.0946671	0.132258	-0.617286	0.600424	-0.595294	-2.56644	-1.06297	0.524873	-2.46133	-0.866744	0.0276893	-2.3672	-0.7335
-0.0123816	0.15029	3.69886	-3.10772	-1.02917	-0.682158	0	1.94579	0.319744	1.94601	0.283733	-0.0105742	-0.206612	0.0738771	-0.94529	6.378	1.33617	-0.887893	-1.19892	-0.874323	-0.513498	1.32202	0.550628
-1.67316	-0.106063	-0.560226	3.24729	1.02917	-0.216589	0	0.606675	-0.560226	1.69855	-2.38941	-1.94336	-0.987277	0	-1.3423	-1.47423	-0.758687	0.530529	-0.32949	0	0.013913	-0.413612	0.0609942
2.19425	0.17671	0.560226	0.0633754	0	0.504646	0	1.40142	0.240481	3.71944	2.18457	1.73165	2.16951	-0.444083	-0.967269	0.657897	0.898691	0.10277	2.28395	1.30863	3.28437	1.23574	0.425921
-0.54107	-0.833264	-0.27972	0.341535	1.35595	-0.107293	0	0.693415	-1.77711	0.404859	3.22809	3.76442	3.51442	0.029667	-0.901245	-1.32015	1.72286	0.414507	2.12774	0.64795	1.6026	1.91676	0.846438
2.05461	0.364299	-0.843887	0.729747	0	0.644546	0	-0.296589	-0.654132	-1.01524	2.0108	2.15051	1.61491	0.672557	-0.0943485	0.331675	0.057885	1.44843	0.838579	0.429646	-0.798089	1.23369	1.1969
-0.632914	-0.230865	0	0.362886	0.336135	0.321973	0	1.08322	0	-1.64613	0.388408	-0.581018	-0.535411	0.484974	0.489643	0.330579	-1.82493	-1.50893	-0.313644	-0.537347	-0.481929	-1.08776	-1.6797
0.409574	-0.0533523	-1.13638	-0.312754	0	0.532669	0	-0.98426	0.409333	0	0.416605	0.29594	0.82625	0.853989	0.56201	0.821697	0.136192	0.525331	3.1945	0.107701	0.0268348	1.62723	0.783372
5.09785	-1.74058	-0.860837	-0.439506	-1.35137	1.5469	0	-0.495787	-0.409333	-4.02171	-1.67694	0.912383	-1.36454	0.11622	0.91121	1.94496	1.16657	0.270158	1.60969	0.107585	1.62346	2.79417	0.359497
-0.300154	0.0723785	-0.2886	0	-1.02565	1.62704	0	0.297767	-2.82881	1.07412	0.406842	-0.0993098	-0.738738	0.108834	1.88875	-0.482704	-0.704164	-0.409232	0	-0.539085	-0.264341	-0.840635	0.298597
2.90729	0.96306	2.28581	0	1.02565	-0.689383	32.2551	-0.496772	0.672837	0.63898	2.87555	1.66034	2.24838	-0.567233	1.6574	0.16116	2.20529	0.593619	3.14368	2.24488	3.25507	7.19198	2.70605
-0.0646657	-0.58393	-0.282886	0.502135	2.35305	-1.32184	0	-0.399202	0.251151	0.634923	-0.204768	0.317097	0.770346	-0.409238	1.47205	-0.484262	-0.556684	-0.472383	0.193237	-0.317629	0.128025	-1.31798	-0.174267
-2.86768	0.700308	-1.71433	-1.07007	-0.332779	0.21007	0	-0.702461	-0.671143	-2.34803	-0.0585823	0.665067	0.0479501	1.14312	1.88356	-2.95588	0.136764	-0.500769	-0.483794	-1.06611	0.255559	-1.63856	0
-0.183793	0.802	0.574714	2.42573	-0.668899	2.00704	0	-1.01215	-3.77403	-0.432901	-0.956804	-0.145257	-0.239981	-0.0362043	1.91655	3.11756	-0.758154	-1.07102	-4.9712	-1.40315	0.127535	-3.88432	-3.24992
2.44858	0.918816	1.4225	-0.545028	-2.03397	1.39391	-32.2551	0.203252	-0.350263	2.35809	0.0739262	0.314458	0.861249	0.0868684	2.41137	0.80451	1.03112	0.307609	-1.4374	-0.108755	-1.41191	-1.98237	0.47933
0.360567	-1.03426	1.40255	-3.24421	0.682597	0.573637	0	0.50633	-2.30711	2.92296	0.501254	-0.392015	0.237925	0.9291	1.29861	-0.481929	-0.00358686	-0.59799	0.103359	-0.326976	0	1.13759	-0.960968
-0.516803	0.602411	0	3.09505	-0.340716	3.30367	0	0.201816	1.86755	-1.03414	0.264356	1.16188	1.0402	0.357808	0.845671	-0.322581	-0.593602	-0.213028	0.720538	-0.437637	-0.882893	0.634252	-0.483969
0.381925	1.26384	1.10804	0.198832	-0.684934	0	0	1.69919	1.39985	1.85381	-0.102722	-0.254361	-0.992681	-0.486933	0.726102	-0.161682	-2.48054	0.36513	0.817165	-0.109709	0.156372	-2.48946	-0.0606612
0.177127	0.0610314	0.549452	-1.01068	0.343054	1.19549	0	-0.796024	2.0637	-7.63082	0.658523	0.153654	1.08671	-0.0287171	0.401124	1.76428	0.166313	-0.706465	-2.05557	-0.660795	0	-1.70696	-0.791963
1.92118	1.85662	2.70287	0.662461	1.36057	1.47065	0	0.796024	4.0856	14.1484	-1.88463	-1.52778	-2.47396	-0.100575	0.335705	-2.2509	-0.931206	-0.697687	-1.14884	-0.665191	0	0	-1.3547
-1.67569	-0.609313	0	0.174259	3.97403	1.41757	0	-0.895974	0.407665	0	0.932028	-1.04805	0.67211	-0.735828	0.429971	1.93243	1.14516	0.180811	1.66671	-0.222717	0	2.38882	1.78192
0.512672	0.600757	0.796817	-0.336344	-0.651468	-0.722271	0	1.29162	-0.489397	2.26853	0.792025	0.799279	0.238949	-0.152168	0.317309	0.794285	0.106804	0.570929	0.309438	0.555866	-1.7867	-1.47724	0.121729
-1.20449	-1.22247	-0.264901	0	0.326265	1.73799	0	-1.69242	-1.31689	-2.45992	1.82402	1.00108	1.65684	0.144928	0.253125	-1.11377	-0.0257699	-0.227065	-0.827306	-0.110926	1.83877	1.79861	0.121581
1.49715	-1.0536	-1.33513	0	-0.653597	1.66459	0	-2.54208	-1.16668	-2.71861	1.46674	0.313805	0.748366	-0.137676	0.0631812	0	0	0.326719	0	0	0	0	0.242719
-1.60547	-0.861544	0.803217	1.31401	0.327333	-1.93604	0	1.0246	1.82729	0.588814	-2.73715	0.298407	0.0931532	0.0652387	0.346785	-0.803217	-1.21874	-0.564241	0.827306	1.10376	0	-1.00323	-0.486028
-0.113941	-0.797806	0	0.503656	1.29872	3.17708	0	-0.408581	-1.99508	-0.195886	3.32912	2.43081	2.02772	-0.0507375	0.282841	0.643089	0.986509	0.549033	0.513612	0.219298	0.259943	0.287667	0.849004
-0.310607	0.257766	-0.534761	-1.58087	0.322061	0.795204	0	0.815499	-0.0839983	-1.58106	0.280663	0.7337	0.182315	-0.523371	0.516473	0.32	1.60712	0.179307	1.52519	1.08934	0.0259572	-0.323683	1.02134
1.40361	-1.16971	-1.34955	-0.0373529	0.641028	0.833499	0	-1.84431	-0.674539	-1.60646	-0.943337	-0.560304	0.136519	-0.797575	0.916796	-0.480385	0.355266	0.310745	1.30328	0.3245	0.0129761	1.25292	0.179158
-0.81516	-0.0269481	0	0	-2.91755	1.10063	0	1.53928	0.253486	-1.83866	0.451659	0.950657	1.17542	-0.147037	0.893138	-0.482704	-0.759189	-0.160557	0.099552	-0.54142	0.0129744	3.11704	-0.598446
-3.63498	-0.63086	1.61729	0	1.63136	-0.85431	0	0	1.50757	1.02565	0.463647	0.11125	-0.540785	-0.184101	1.38542	-2.11907	-1.27334	-1.93934	-3.54467	-2.19548	-1.56907	-0.518584	-2.24592
1.68072	0.33395	-0.805373	-0.762551	0.323102	0.0372062	0	-1.95379	0.580192	0	0.126077	2.25377	1.03395	-0.621074	1.30682	-0.495459	0.375982	-0.416632	1.7374	-0.779948	0.0263539	0.346021	0.183993
-2.79577	0.494361	-1.35687	0.787455	0.322061	0.060947	0	-0.416234	-0.248242	0.610378	0.0559832	-0.0997009	0.890478	-0.931418	1.0835	-0.497926	0.908298	-0.0147455	0.404449	-0.448431	-1.03298	0.825598	0.975617
1.1465	0.143356	2.16225	0.867738	0	-2.28543	0	0.416234	0.742884	4.17141	-0.33637	-1.24554	-0.622501	0.0374237	0.911101	-0.333334	-0.464106	0.268184	-1.01421	-0.67644	-2.39807	1.05641	-0.303859
-1.4006	1.89789	-0.267738	1.59181	0.321028	0.807114	0	2.56293	2.99739	0.968062	1.43566	1.23194	0.445039	-0.164769	0.481577	1.16184	0.277991	-0.248006	-0.306279	0.113058	2.98209	-0.509772	0.36452
-0.560368	0.342031	0.267738	1.86539	0.956945	0.714319	0	0.504797	1.19002	2.66175	-0.235539	-0.099814	-0.311319	0.0149903	0.493756	0.16488	1.53687	0.30295	2.32451	2.34517	0	0.712955	0.664856
0.809864	-1.3397	0.798939	-1.09094	1.57484	0.206866	0	1.00201	1.56498	1.85879	-0.333473	-0.199927	0.665929	0.754101	0.37594	1.63402	-1.57706	0.103613	-2.9399	-0.331675	0	-0.883458	-1.15118
-0.564751	0.601559	-1.06668	-0.422783	0.623055	-0.354741	0	-0.299551	0	-0.184332	-1.51454	-0.959744	-1.15711	1.1831	0.216247	0.485045	0.237239	0.839626	0	0.662254	-0.238505	1.69209	1.39185
-1.36871	-0.211902	0.801072	0.398672	-2.51586	0.413916	0	0.498754	0.464757	2.37021	-4.11046	-3.19146	-2.81453	-0.737793	0.0287977	-0.972455	0.109306	-0.0835694	0.615387	-0.110072	0.792816	-0.80863	-0.542333
0	0.247175	0	1.61458	0	0	0	0	0	0	0	0	0	0	0	0	0	-0.358068	0	0	0	0	0
-2.08047	-0.459527	-1.06953	0	1.57981	0.50209	0	-1.10056	-0.387147	-0.361011	-1.66275	-1.44698	-0.878618	-0.133383	0.0575705	-0.162999	-0.288095	0.223751	0.408164	-0.441502	0	0.842181	-0.7886
0.969004	0.0354233	-1.62605	4.63636	-1.57981	-4.144	0	-0.706717	0.926648	-3.30913	2.13278	2.0473	2.15951	-0.0296648	0.186876	0.974034	-0.219362	-0.0138257	-0.305967	0.220995	-4.85401	1.49828	0.667681
-2.6678	1.72055	0	-0.659093	-1.60517	-0.522307	0	-0.507873	1.44985	0.744882	-1.86368	-1.3809	-1.05096	0.996355	0.544258	-0.161682	0.208406	0.172684	0.712471	0.110314	2.21351	0.593082	-0.121065
-0.025981	-0.436111	-0.82305	0.772292	1.92314	2.16416	0	0.406505	-1.75778	-0.558141	-1.76223	-0.478974	-1.52745	2.22231	1.51679	1.44581	0.553635	-0.448061	0.505818	-0.44199	0	1.4675	-0.242571
-3.9917	-0.271347	-3.64697	0.124371	0.316957	0.120631	0	-1.94579	-4.41364	-3.41589	-1.60837	-1.03278	-1.03142	-0.14375	0.910307	-0.640002	1.30631	-0.368867	1.80005	0.331675	0.539085	0.258649	-0.0607349
-2.16297	-1.22582	0.85349	-1.37666	-1.59493	0.060261	0	-0.103466	0.802573	0.960622	1.15147	-0.881922	-0.851875	0.129385	1.06775	0.480385	1.73441	0.144468	-2.50891	-0.998344	-1.08109	1.69686	0.242719
0.171269	-0.551652	-1.71433	-2.29442	0.960007	0.689879	0	-0.727276	1.03381	1.32955	-1.16691	-1.02812	0.142484	0.315571	1.36988	1.11201	1.62168	0.303706	2.40976	0.44494	1.08109	-0.732837	1.44407
-1.24044	-1.50122	-1.15943	1.43151	-0.960007	-0.569466	0	-2.10756	-3.70711	1.49816	1.85148	1.86637	1.88064	0.599702	1.44529	0.157853	1.64014	-0.10781	1.86738	0.442969	2.12774	-0.738248	0.773583
3.77825	0.180979	0.581397	3.13948	-0.645164	-3.36319	0	-0.641028	3.7862	-1.30965	-0.288469	-0.496255	-0.841913	0.0853789	1.62281	0.157604	-0.08871	-0.00693463	-1.17533	-0.442969	-2.93746	-0.646415	-0.594532
-0.54485	0.0271186	-3.24034	0	0.645164	-1.28334	0	-1.62078	0.944145	-0.946081	0.500494	-0.322423	0	0.241512	1.8174	0.940446	-0.939682	0.240889	0.393314	0.553405	2.93746	-0.846635	1.00861
0.993079	0.0722805	3.24034	1.21322	0.641028	-1.58723	0	0.108873	0.156495	3.73178	0.422706	-1.06253	-0.28222	0.0496507	1.96299	-2.04893	-0.63602	-0.152316	0.587086	0.110314	-2.12774	-0.524591	-0.177253
-2.08792	-0.889056	0	0.606631	-0.32	-0.449292	0	-1.97809	0.701211	-3.35227	0.375912	1.76467	1.44964	-0.227176	1.73808	0.317965	0.573979	-0.0670001	-1.17764	-0.774769	-4.39631	2.69191	0.413102
1.9816	-0.191545	-3.54019	0	-2.92704	1.72086	0	-1.00391	-1.64387	-2.88204	0.419351	-1.11891	-1.16742	0.0213197	1.67156	-2.08508	-1.08154	0.578416	-0.296589	0.995033	0	-2.20002	1.40353
3.56869	-0.155329	-0.300752	-1.50679	-0.995033	2.126	0	-2.49729	-1.51096	0.389106	-2.88073	-3.80068	-3.68375	0.390058	1.72859	2.08508	-2.17032	-1.89592	-1.49629	-1.2175	0	-0.656386	-3.72714
-1.69791	0.0913993	-1.21214	-2.99139	1.32452	-0.683244	0	0.801378	-0.562476	-1.56559	1.37491	1.57986	2.31224	0.141463	1.42594	0.947874	-0.686207	-0.182825	-0.908638	-1.5713	0	-1.3926	-0.725956
-0.474232	-0.439481	-0.611623	-2.20965	-0.32949	-0.749618	0	-2.42366	-1.13453	-1.9921	-1.25192	-0.22633	-0.429492	-0.0494892	1.28851	-0.157356	-2.01412	-0.366657	-0.406505	-1.48151	0	-2.16006	-0.547947
3.71125	0.384651	0.916037	-3.93336	0.657897	-0.0947878	0	0.349855	0.325468	2.18914	1.2671	-0.986725	-1.0577	0.564137	0.760549	1.09633	-1.004	0.0102031	-1.02355	-0.4603	-1.12996	2.16006	-0.183318
-1.19378	-0.201299	0.907722	0	1.30295	-0.535139	0	-1.05326	-0.0812678	1.36855	-0.364742	-0.137394	-0.971353	0.252827	0.441964	0.155642	0.368936	-0.475154	-1.03414	-0.115407	-0.512676	0.100117	-0.183655
-0.112021	0.493377	0	-0.146879	0.966191	3.2621	0	1.63364	1.45281	-0.779731	4.96019	2.37507	2.07687	-0.203616	0.0348088	-0.780644	0.0405	0.107973	-0.625654	0.115407	0.028551	1.81793	0.549956
-0.438005	-0.0638191	-1.51748	0.938745	0.956945	-1.78857	0	-2.34203	-0.481929	-2.97937	1.28124	-0.613514	-0.7196	-0.3732	-0.663449	-2.37918	-0.635157	-0.251592	-0.734911	0.115274	-0.257253	-3.56764	-0.4887
-0.601129	0.473115	0.913248	0	-1.27797	-0.875562	0	-0.952388	1.12091	-1.42134	7.33414	0.861838	1.10128	0.0211618	-0.950432	-0.644125	-0.490197	-0.436065	-1.05933	-0.461895	-0.545273	0.372692	-0.18388
-3.51999	0.145125	-0.607905	-0.681848	0	0.656842	0	0.119546	-3.23653	2.02436	2.85659	2.43538	1.55921	0.541625	-0.591228	-0.323625	-0.328138	-0.423637	0.742709	-0.464038	-0.548263	0.640488	-0.677134
2.43988	-0.937948	-2.15725	0.414534	4.09506	0.0623841	0	-0.719428	1.30721	0.400001	-5.25111	0.198283	0.0468713	-0.386576	-0.749959	1.44813	-0.975837	-0.443038	-0.105764	-0.934586	-0.260756	-0.640488	-1.1805
1.97722	-0.568861	1.54563	-1.56962	-3.45403	-0.0623841	0	-0.361664	0.24321	3.14368	0.921541	2.2359	1.58069	0.470721	-0.86404	1.42746	-0.0528162	0.0951593	0.842998	-0.11744	0.0145043	0.774806	0.933133
-0.344591	-1.76371	-3.75044	0.616069	0.636945	3.99401	0	-1.09291	-1.96245	-3.34348	-0.324281	-1.72989	-2.38051	0.524312	-0.55596	1.40737	-1.52477	-0.385193	-1.26718	-1.42014	0.592873	-2.37702	-1.74895
-1.65981	0.420542	1.26584	-1.23596	-1.60003	0.468065	0	-0.735297	-1.66532	1.58733	0.405187	0.508248	0.799816	0.936889	-0.32777	0.464757	-0.576393	0.668535	1.37205	-0.119261	0	-0.724266	1.06551
0.444716	-0.102636	0	0.0248694	0	0	0	0	0	0	0	0	0	-0.0276339	0	-0.309598	-1.54566	0.105151	-0.630917	-0.47847	0.0144165	-2.09871	0
0.518659	-1.58076	0.313972	0	0	0.83932	0	-1.11318	0.251572	2.71861	-1.54852	0.786036	1.11837	0.289775	-0.158199	0	-0.687261	0.174211	-0.105541	1.36948	0.0144144	0.352859	0.124611
-0.627805	2.34334	2.47691	-1.23852	1.28207	-0.218275	0	4.73677	0.417886	1.89759	0.994355	-1.73751	-0.744189	0.912121	-0.231665	1.07942	-1.03784	-0.266611	0	-0.891007	0.302224	-1.77688	-0.374299
-0.583858	1.21548	-1.8519	4.37181	-0.31898	0.230733	0	-2.64438	-0.585531	-1.32452	0.203101	1.93187	1.39084	0.184156	-0.305642	-1.54563	1.64679	0.534098	1.8829	1.30411	0.872743	1.91767	0.685147
1.90283	0.182882	-2.20481	1.1263	-0.641028	-1.33983	0	0.121729	0.0838574	-3.09502	0.243178	0.519604	0.916597	-1.14451	-0.183835	-0.938974	-0.972162	-0.565182	-1.56661	-0.709223	0.568183	-0.422983	-0.0620925
-0.958344	-1.89059	-1.60517	-2.64396	-0.645164	0.0599542	20.6227	-2.33857	-0.926322	-4.41839	-5.03634	-4.10183	-5.14854	1.42351	-0.31945	-1.74469	-3.06827	-0.650202	-1.05821	-0.594886	0	-1.9619	-1.56498
-0.0245472	-0.139749	1.92314	4.69592	0.323102	0.356877	-0.262812	-0.499377	-1.6205	2.6344	-0.269982	0.127545	0.28777	0.677234	-0.431646	2.21528	1.30064	0.080204	-0.212993	0	0.564973	2.24408	0.941922
1.19174	-0.889644	-1.60003	-0.538391	-2.9462	0.709956	-1.05821	-1.89519	-1.29816	2.56677	1.06151	1.26174	0.477784	0.0742165	-0.70698	-0.627946	0.104611	-0.41213	0.637622	-0.838831	0.561799	-1.56198	-0.878851
-3.58264	0.2255	0	-0.0117364	0.331675	1.08645	0.265604	1.64457	1.38411	-1.76996	-4.03645	-4.49514	-3.44276	0.0674218	-0.812352	0.314466	-0.835913	-0.2063	-1.1721	-0.603502	-0.280505	-2.20664	-0.569082
-0.692603	-0.782027	1.91699	0.351494	-1.66949	0.375948	0	1.2469	0	1.76996	-0.278899	0.57055	0.246366	0.148168	-0.679932	1.09291	-0.797985	-0.963787	-1.94811	-0.121139	-0.281294	-1.3255	-0.955726
-2.4079	-0.702423	0.315956	-0.398454	0	-0.93115	1.57898	0.371058	-0.430478	-0.586512	1.09642	1.58837	1.27141	-0.188616	-0.671867	1.23458	0.122554	-0.110019	-0.547947	-1.83491	-0.282088	0.922346	-0.835749
-1.54469	0.957489	0.941922	-0.612487	1.00503	0.361541	0.520835	0.492612	-0.953627	0.586512	0.926201	0.0743034	-0.097229	-0.195728	-1.00992	-0.153492	-1.38126	-0.731639	-2.67276	-1.49257	-1.39385	-2.04051	-1.29956
1.25422	1.51688	1.24225	-0.64004	-1.00503	0.571659	0	0.245399	1.38411	2.12158	1.2739	0.887361	0.581961	0.317022	-1.20211	0.306749	1.36493	0.955623	0.674918	3.20619	0.028641	1.41424	1.3641
-1.11296	0.823659	1.22701	-0.226177	0.671143	-1.54771	0	0	-0.0859476	-0.574164	-3.4878	1.7418	0.722721	-0.148268	-0.953819	-0.153257	-0.421467	-0.356983	0.892863	0.604963	2.29309	-0.965474	-0.517466
-1.45187	-0.258398	-1.22701	-0.131179	-0.335009	-2.67496	0	1.21804	0.941385	-0.57748	4.13991	0.15904	0.574439	-0.0674673	-1.24176	-0.30722	2.71828	0.241388	2.63173	1.19906	-0.196106	1.48151	0.517466
-0.13308	-0.203497	1.83491	1.50414	-0.336135	1.00026	0	0.362538	0.170213	5.9943	0.507401	1.09673	1.04464	0.699445	-1.0691	-0.308167	-0.043906	0.0838602	1.07644	0.238095	0.0140203	0.586512	0.386349
2.3692	-1.00503	0.604231	0.281723	0.671143	-0.483985	0	0	-0.682597	-1.46523	0.644621	1.86392	1.174	0.24098	-1.3118	1.22701	0.0718362	-0.137633	-0.321716	-0.715994	0.0420492	0.692044	-0.515465
-2.79902	0.130853	-0.301659	0.0234412	0	0	0	1.07979	-1.03271	-1.11318	-4.17886	0.186829	-0.608759	-0.247682	-1.77166	-0.918843	0.123597	-0.247237	-0.107469	-0.721157	0.0140125	0.615164	0.386848
0.161345	0.781545	1.20122	0.991204	0	2.95619	0	0.713439	-0.433464	2.94139	3.61856	-0.514621	0.515344	-0.107296	-1.91654	-0.617286	-0.812151	0.0228726	-0.215285	-0.362538	-0.830114	0	-0.128783
-2.69308	-1.15587	1.18696	0.359067	1.32892	-0.886054	0	3.26369	-2.37374	0.901719	-1.85729	-1.19852	-1.36441	0.234561	-1.16495	-0.310078	0.89181	-0.188038	0	0.603502	0.0141273	1.21909	0.385853
-3.65541	-1.00825	-2.08651	-1.42061	0.98523	0.798215	0	-2.20299	-1.3435	1.07144	-1.55757	-1.90254	-1.91302	-0.174193	-1.54082	0.773399	-2.12864	-0.368925	-0.107817	-0.724641	-1.40837	-3.18637	-0.90265
0.168784	-0.75099	0.300752	0.444653	0.651468	-0.798215	0	-0.117302	0.897672	-0.355872	0.217786	0.723104	1.24762	-0.140916	-1.96372	-0.154202	-0.595556	-0.276355	-0.649353	-0.242719	-0.531496	-1.93171	-0.259404
-1.10534	0.864572	0	-0.903073	0.969313	0.798215	0	0.468385	2.29692	0	-0.669386	0.354814	0.238152	0.549121	-2.29035	1.53142	1.10265	0.450329	-0.108637	1.08762	0.014402	1.63694	0.776201
2.53213	0.885295	0.29985	0	1.91089	-1.33427	-1.30721	-0.938974	0.956113	2.11648	0.756367	-0.182045	0.332463	0.572686	-2.14272	0.15186	-1.21727	-0.711758	-1.64387	-0.844905	-2.33111	0.99138	-1.03628
-1.43914	0	-0.29985	0.0235599	4.01909	-1.0501	0	1.40518	-0.0865426	-1.406	0.231582	1.68319	1.08466	-0.026564	-2.30039	-1.0679	0.641015	0.0759427	1.64387	1.20483	0	1.19849	0.324992
0.268074	-0.923141	0.598804	-0.55513	-3.39016	-0.029651	0	0.579712	-0.695051	0.353357	-3.30694	-3.9381	-2.4212	-0.0730873	-2.06325	0	0.0203471	-0.119718	-2.19789	-1.32612	0.0294768	1.43372	-0.194869
-1.03019	-0.0567967	-0.598804	-0.987927	1.24612	0.119609	0	-0.812541	-0.612158	-0.885745	-0.164511	-0.526149	0.192031	0.444342	-3.0186	-1.07942	0.883133	0.250831	-0.22247	1.56535	0.0589275	-1.18133	0.454104
-0.306863	-0.369967	-3.35909	-0.155623	-1.56009	-1.57908	0	-5.1416	-1.23567	-3.25526	1.19031	1.78354	1.4286	0	-2.9752	-0.155159	-0.618997	0.123534	1.43728	-1.08109	0.0147265	-0.46923	-0.779731
0.180396	-0.543195	-0.311042	-1.69147	-1.26584	-2.16513	0	0.122624	-1.61149	-2.41872	-0.533888	-0.46602	-0.141945	-0.318134	-2.55466	-0.936044	-0.602436	-1.58452	-0.660795	-1.70528	0.0147243	-1.93613	-1.57794
-0.256298	-0.354186	2.46166	-3.37041	0	-1.70348	0	1.82154	-0.361664	1.49535	-0.312756	0.340021	-0.522194	-0.199349	-2.82061	0.469117	-1.88347	0.149567	-1.22292	-0.987662	-3.59751	-0.963684	-0.066291
1.37551	-1.85836	0.30349	0.339687	0.634923	-0.287503	0	-1.33255	-1.18452	-1.87271	-2.98258	-2.50915	-1.8737	-0.0332635	-1.86409	0.622086	-4.24945	-1.51347	-5.16466	-3.92207	0.304785	-4.37748	-4.19831
0.652004	-0.362124	1.20483	-2.97007	-2.88945	-0.703777	0	3.1215	0.18315	1.87271	0.567008	0.059651	0.193799	-0.466854	-2.37062	0.154919	2.4358	0.13977	4.15285	0.771212	-3.02773	3.62982	2.25651
-0.237631	-1.0844	-0.29985	1.34937	1.29452	1.11855	0	-0.711747	-0.826831	2.92525	0.745988	-0.258745	0.241721	0.0467836	-2.73832	-0.154919	-0.195072	-0.184707	1.12361	-0.25641	2.17197	1.15651	-0.746525
1.80154	-1.8507	-0.602411	0	0.960007	-0.797522	0	0.356507	-0.833724	-2.92525	0.860837	1.57686	0.529739	-0.1538	-1.56528	1.3857	1.2151	0.630661	2.97215	1.65503	-2.8013	0.591718	0
2.50032	0.221886	-0.302572	1.23059	0.634923	-0.611395	0	-1.19333	0.741431	-2.82239	1.22554	0.264486	0.67018	0.274	-1.39001	-0.153022	0.943285	0.107811	-1.09052	0.378072	0.0315607	0	0.611207
2.28697	-0.535382	-2.76515	0.503082	-1.59493	0.193298	0	-2.18455	0.0922935	-0.191022	0.784202	2.60231	2.26425	0.532483	-1.02503	-1.38784	-0.633441	0.618506	1.19892	0.376648	3.44273	-0.258446	-0.0677277
0.99954	0.151814	-3.16482	-1.23708	0.321028	0.513642	0	-2.73649	-0.64785	-0.767758	1.86894	-0.152621	0.232937	0.139308	-1.1582	-0.466927	-0.217628	-0.479702	-0.870517	-1.96147	-3.28508	-1.86573	-1.08993
1.00438	1.90329	0	-1.0085	1.58986	0.127999	0	0	0.832182	0	0.835499	0.680226	1.01853	0	-2.35743	-1.57236	2.06501	1.49687	1.84087	0.446287	5.87325	1.04909	1.89965
-0.599585	0.52452	-0.322061	0.205076	-0.950879	0.191692	0	-0.759497	1.64387	-5.54598	0.37228	0.46823	0.642794	-0.165865	-1.47557	0	0	0.215091	0	0	0	0	0.0671817
-0.697507	-1.64207	-2.28395	1.03179	-2.90812	-2.15999	0	-2.18377	-1.27623	-0.203874	-2.06491	-1.03397	-0.0457771	-0.245986	-1.36842	0.946379	0.711572	-0.0653057	2.22821	2.38855	-0.267738	1.91959	-0.0671817
0.887765	0.290567	-0.330579	1.49679	-0.988476	-0.22914	0	0.259404	0.183318	2.41947	1.64958	1.18485	1.58986	-0.0932339	-1.30013	0.469852	-1.01574	-0.466646	-0.315292	-1.50191	-0.567589	-1.28797	-1.01318
-2.63592	-0.914625	0.330579	-1.05423	0.330579	1.2017	0	-0.389358	1.81493	-1.40424	0.814698	1.65409	-0.135288	-0.0733162	-0.48098	0.467655	-0.173046	-0.238722	3.10906	-0.126183	-2.97985	-1.60541	-1.16082
1.86	-0.414833	3.24704	-0.696338	1.6367	-0.290549	0	1.54842	0.448632	2.00007	-0.58534	-5.7461	-0.0451365	0	-0.417262	0	-1.57104	0.169743	-0.102093	0	-1.55524	-3.71904	-0.137457
-0.903999	-0.416561	0	-0.139851	0	0	0	0	0	0	0	0	0	0.425816	0	-0.155642	-0.386133	-0.121453	0.102093	-0.50633	0.031343	-0.0781555	0
[truncated: 929 more rows]
