# Supplementary material for: Response of commodity markets to global warming attention
Source: Research Square preprint supplement (doi:10.21203/rs.3.rs-4567325/v1), 2024-06-24
Supplement: Supplementary file 1 [file README.pdf › Data and code20240611/Code/Market uncertainty calculation code/GDFM code/README.pdf]

# INSTRUCTION FOR MATLAB CODES FOR ESTIMATING THE GENERALIZED DYNAMIC FACTOR MODEL

## List of functions

- `gdfm_twosided.m` estimates the Generalized Dynamic Factor Model as in Forni, Hallin, Lippi, and Reichlin (2000);
- `gdfm_onesided.m` estimates and forecasts the Generalized Dynamic Factor Model as in Forni, Hallin, Lippi, and Reichlin (2005);
- `gdfm_unrestricted.m` estimates and forecasts the Generalized Dynamic Factor Model as in Forni, Hallin, Lippi, and Zaffaroni (2017);
- `numfactors.m` estimates the number of factors as in Hallin and Liška (2007);
- `spectral.m` computes the spectral density decomposition used by all other functions;
- `exampleAR.m` and `exampleMA.m` examples with AR or MA factor loadings.

## References

Forni Hallin Lippi Reichlin (2000) “The Generalized Dynamic Factor Model: Identification and Estimation”, *The Review of Economics and Statistics*, 82, 540-554.

Forni Hallin Lippi Reichlin (2005) “The Generalized Dynamic Factor Model: One-sided Estimation and Forecasting”, *Journal of the American Statistical Association*, 100, 830-840.

Forni Hallin Lippi Zaffaroni (2017) “Dynamic Factor Models with Infinite-Dimensional Factor Space: Asymptotic Analysis”, *Journal of Econometrics*, 199, 74-92.

Hallin and Liška (2007) “Determining the Number of Factors in the General Dynamic Factor Model”, *Journal of the American Statistical Association*, 102, 603-617.

## Credits

The codes were written by Matteo Barigozzi, Mario Forni, Roman Liška, and Matteo Luciani, were commented and debugged by Matteo Barigozzi and are available from [www.barigozzi.eu/codes.html](http://www.barigozzi.eu/codes.html).
