# Supplementary material for: Response of commodity markets to global warming attention
Source: Research Square preprint supplement (doi:10.21203/rs.3.rs-4567325/v1), 2024-06-24
Supplement: Supplementary file 3 [file Commodity daily prices.xlsx]

## Sheet: Cocoa
2010-12-31	3107.08
2011-01-03	3107.08	1	0
2011-01-04	3046.24	2	-1.97753
2011-01-05	3013.73	3	-1.07295
2011-01-06	2938.11	4	-2.5412
2011-01-07	2921.62	5	-0.562826
2011-01-10	2939.83	1	0.62135
2011-01-11	2967.65	2	0.941864
2011-01-12	3016.48	3	1.63202
2011-01-13	3050.96	4	1.13657
2011-01-14	3052.09	5	0.0370307
2011-01-17	3115.21	1	2.047
2011-01-18	3115.21	2	0
2011-01-19	3119.91	3	0.150759
2011-01-20	3188.91	4	2.1875
2011-01-21	3402.72	5	6.48959
2011-01-24	3263.46	1	-4.17871
2011-01-25	3371.33	2	3.25193
2011-01-26	3394.56	3	0.686682
2011-01-27	3402.72	4	0.240096
2011-01-28	3403.69	5	0.0285025
2011-01-31	3330.95	1	-2.16026
2011-02-01	3411.17	2	2.37978
2011-02-02	3383.05	3	-0.827767
2011-02-03	3436.92	4	1.57981
2011-02-04	3425.7	5	-0.326989
2011-02-07	3340.2	1	-2.52751
2011-02-08	3304.14	2	-1.08545
2011-02-09	3331.15	3	0.814136
2011-02-10	3354.35	4	0.694042
2011-02-11	3439.85	5	2.51699
2011-02-14	3439.85	1	0
2011-02-15	3439.85	2	0
2011-02-16	3421.15	3	-0.545111
2011-02-17	3449.37	4	0.821485
2011-02-18	3461.84	5	0.360863
2011-02-21	3475.67	1	0.398703
2011-02-22	3475.67	2	0
2011-02-23	3475.67	3	0
2011-02-24	3630.49	4	4.35804
2011-02-25	3583.57	5	-1.30081
2011-02-28	3634.65	1	1.41533
2011-03-01	3634.65	2	0
2011-03-02	3635	3	0.00962907
2011-03-03	3675.28	4	1.10202
2011-03-04	3730.25	5	1.48459
2011-03-07	3641.95	1	-2.3956
2011-03-08	3669.08	2	0.74217
2011-03-09	3631.08	3	-1.04108
2011-03-10	3553.31	4	-2.16506
2011-03-11	3553.31	5	0
2011-03-14	3417.26	1	-3.90405
2011-03-15	3461.36	2	1.28225
2011-03-16	3308.43	3	-4.51878
2011-03-17	3283.68	4	-0.750901
2011-03-18	3353.66	5	2.10875
2011-03-21	3180.61	1	-5.29793
2011-03-22	3260.66	2	2.48566
2011-03-23	3333.6	3	2.21232
2011-03-24	3318.59	4	-0.451281
2011-03-25	3266.33	5	-1.5873
2011-03-28	3304.29	1	1.15546
2011-03-29	3311.31	2	0.212226
2011-03-30	3128.6	3	-5.67583
2011-03-31	3056.01	4	-2.34755
2011-04-01	3020.05	5	-1.18368
2011-04-04	3090.04	1	2.29106
2011-04-05	3086.83	2	-0.103936
2011-04-06	3049.11	3	-1.22949
2011-04-07	3076.42	4	0.891684
2011-04-08	3076.42	5	0
2011-04-11	3048.61	1	-0.908083
2011-04-12	3078.47	2	0.974697
2011-04-13	3116.6	3	1.23099
2011-04-14	3119.39	4	0.0894806
2011-04-15	3171.4	5	1.65357
2011-04-18	3206.3	1	1.09445
2011-04-19	3206.3	2	0
2011-04-20	3124.59	3	-2.58145
2011-04-21	3141.09	4	0.52668
2011-04-22	3141.09	5	0
2011-04-25	3141.09	1	0
2011-04-26	3120.28	2	-0.664713
2011-04-27	3132.87	3	0.402678
2011-04-28	3191.98	4	1.86919
2011-04-29	3191.98	5	0
2011-05-02	3191.98	1	0
2011-05-03	3299.24	2	3.30507
2011-05-04	3289.5	3	-0.295656
2011-05-05	3204.32	4	-2.62357
2011-05-06	3092.09	5	-3.56527
2011-05-09	3108.06	1	0.51515
2011-05-10	3108.01	2	-0.00160873
2011-05-11	3132.23	3	0.776256
2011-05-12	3144.72	4	0.397965
2011-05-13	3072.29	5	-2.33016
2011-05-16	3072.29	1	0
2011-05-17	3041.73	2	-0.999678
2011-05-18	3018.24	3	-0.775255
2011-05-19	3032.51	4	0.471678
2011-05-20	3027.57	5	-0.163034
2011-05-23	2965.55	1	-2.06978
2011-05-24	2965.55	2	0
2011-05-25	2919.01	3	-1.5818
2011-05-26	3004.12	4	2.87402
2011-05-27	3041.28	5	1.22938
2011-05-30	3041.28	1	0
2011-05-31	3003.71	2	-1.24303
2011-06-01	3037.63	3	1.12294
2011-06-02	2989.21	4	-1.60685
2011-06-03	2939.26	5	-1.68513
2011-06-06	2924.56	1	-0.501381
2011-06-07	2924.56	2	0
2011-06-08	2938.39	3	0.471777
2011-06-09	2957.05	4	0.633034
2011-06-10	3037.51	5	2.6846
2011-06-13	2938.12	1	-3.32682
2011-06-14	2993.42	2	1.86466
2011-06-15	3020.86	3	0.912501
2011-06-16	3017.29	4	-0.118248
2011-06-17	3017.29	5	0
2011-06-20	2966.01	1	-1.71415
2011-06-21	2966.01	2	0
2011-06-22	3068.7	3	3.40364
2011-06-23	3086.33	4	0.572866
2011-06-24	3086.33	5	0
2011-06-27	3011.43	1	-2.45676
2011-06-28	3051.53	2	1.32281
2011-06-29	3076.49	3	0.814623
2011-06-30	3150.6	4	2.38036
2011-07-01	3193.97	5	1.36717
2011-07-04	3193.97	1	0
2011-07-05	3209.14	2	0.473833
2011-07-06	3265.77	3	1.74926
2011-07-07	3227.13	4	-1.19024
2011-07-08	3229.45	5	0.0718647
2011-07-11	3229.45	1	0
2011-07-12	3097.91	2	-4.15842
2011-07-13	3107.11	3	0.296534
2011-07-14	3220.82	4	3.5943
2011-07-15	3196.88	5	-0.746065
2011-07-18	3224.73	1	0.867389
2011-07-19	3217.54	2	-0.223213
2011-07-20	3223.45	3	0.183512
2011-07-21	3223.77	4	0.00992676
2011-07-22	3223.77	5	0
2011-07-25	3118.32	1	-3.32571
2011-07-26	3055.41	2	-2.03806
2011-07-27	3090.1	3	1.12897
2011-07-28	3105.96	4	0.511939
2011-07-29	3050.07	5	-1.81583
2011-08-01	3052.79	1	0.0891385
2011-08-02	3024.4	2	-0.93432
2011-08-03	3013.96	3	-0.34579
2011-08-04	3005.21	4	-0.290738
2011-08-05	2992.37	5	-0.428173
2011-08-08	3018.4	1	0.866117
2011-08-09	3018.4	2	0
2011-08-10	2994.94	3	-0.780269
2011-08-11	2940.21	4	-1.84432
2011-08-12	2946.2	5	0.20352
2011-08-15	2962.46	1	0.55038
2011-08-16	3015.31	2	1.76826
2011-08-17	3015.31	3	0
2011-08-18	3126.62	4	3.62499
2011-08-19	3080.06	5	-1.50035
2011-08-22	3088.49	1	0.273322
2011-08-23	3121.65	2	1.06794
2011-08-24	3201.34	3	2.52078
2011-08-25	3146.57	4	-1.72565
2011-08-26	3088.81	5	-1.85271
2011-08-29	3088.81	1	0
2011-08-30	3140.4	2	1.65643
2011-08-31	3149.45	3	0.287765
2011-09-01	3167.11	4	0.559167
2011-09-02	3130.72	5	-1.15565
2011-09-05	3104.46	1	-0.842322
2011-09-06	3143.47	2	1.24875
2011-09-07	3047.18	3	-3.11107
2011-09-08	3008.14	4	-1.28946
2011-09-09	2979.47	5	-0.957652
2011-09-12	2933.97	1	-1.5389
2011-09-13	2927.42	2	-0.223497
2011-09-14	2878.52	3	-1.68452
2011-09-15	2864.22	4	-0.498021
2011-09-16	2857.53	5	-0.233845
2011-09-19	2777.59	1	-2.8374
2011-09-20	2788.29	2	0.384486
2011-09-21	2788.29	3	0
2011-09-22	2739.07	4	-1.78101
2011-09-23	2692.25	5	-1.72412
2011-09-26	2731.42	1	1.44443
2011-09-27	2771.73	2	1.46501
2011-09-28	2716.49	3	-2.01311
2011-09-29	2749.93	4	1.22349
2011-09-30	2665.51	5	-3.118
2011-10-03	2640.51	1	-0.942333
2011-10-04	2640.51	2	0
2011-10-05	2698.63	3	2.17722
2011-10-06	2698.63	4	0
2011-10-07	2698.63	5	0
2011-10-10	2698.63	1	0
2011-10-11	2646.26	2	-1.95969
2011-10-12	2669.71	3	0.882253
2011-10-13	2667.93	4	-0.0666961
2011-10-14	2667.93	5	0
2011-10-17	2667.93	1	0
2011-10-18	2666.5	2	-0.053614
2011-10-19	2666.5	3	0
2011-10-20	2620.5	4	-1.74016
2011-10-21	2674.31	5	2.03263
2011-10-24	2674.31	1	0
2011-10-25	2725.02	2	1.87844
2011-10-26	2725.02	3	0
2011-10-27	2769.63	4	1.6238
2011-10-28	2769.63	5	0
2011-10-31	2721.25	1	-1.76224
2011-11-01	2622.06	2	-3.71311
2011-11-02	2665.84	3	1.65589
2011-11-03	2728.95	4	2.33977
2011-11-04	2715.88	5	-0.480089
2011-11-07	2738.75	1	0.838559
2011-11-08	2686.35	2	-1.93182
2011-11-09	2594.84	3	-3.46585
2011-11-10	2546.77	4	-1.8699
2011-11-11	2549.5	5	0.107137
2011-11-14	2528.41	1	-0.830661
2011-11-15	2560.2	2	1.24947
2011-11-16	2549.23	3	-0.429403
2011-11-17	2533.7	4	-0.611067
2011-11-18	2479.63	5	-2.15713
2011-11-21	2428.87	1	-2.06832
2011-11-22	2427.42	2	-0.0597164
2011-11-23	2412.8	3	-0.604107
2011-11-24	2409.09	4	-0.153882
2011-11-25	2395.34	5	-0.57239
2011-11-28	2373.63	1	-0.910475
2011-11-29	2334.59	2	-1.65841
2011-11-30	2321.53	3	-0.560984
2011-12-01	2305.9	4	-0.67554
2011-12-02	2252.72	5	-2.33327
2011-12-05	2237.8	1	-0.664513
2011-12-06	2200.56	2	-1.67814
2011-12-07	2180.27	3	-0.926315
2011-12-08	2180.27	4	0
2011-12-09	2098.67	5	-3.81449
2011-12-12	2210.18	1	5.17701
2011-12-13	2288.19	2	3.46872
2011-12-14	2211.02	3	-3.43072
2011-12-15	2176.74	4	-1.56256
2011-12-16	2135.53	5	-1.91135
2011-12-19	2101.68	1	-1.59778
2011-12-20	2209.67	2	5.01062
2011-12-21	2255.76	3	2.06438
2011-12-22	2240.55	4	-0.676557
2011-12-23	2229.79	5	-0.481396
2011-12-26	2229.79	1	0
2011-12-27	2225.99	2	-0.170565
2011-12-28	2155.19	3	-3.23229
2011-12-29	2112.49	4	-2.00115
2011-12-30	2145.22	5	1.53748
2012-01-02	2240.55	1	4.34793
2012-01-03	2143.38	2	-4.43373
2012-01-04	2111.84	3	-1.48244
2012-01-05	2064.6	4	-2.26231
2012-01-06	2066.61	5	0.0973081
2012-01-09	2204.62	1	6.46456
2012-01-10	2378.28	2	7.58224
2012-01-11	2388.18	3	0.415403
2012-01-12	2360.6	4	-1.16157
2012-01-13	2306.16	5	-2.3332
2012-01-16	2286.41	1	-0.86009
2012-01-17	2306.77	2	0.886538
2012-01-18	2312.11	3	0.231225
2012-01-19	2365.5	4	2.28289
2012-01-20	2310.04	5	-2.37246
2012-01-23	2314.66	1	0.199797
2012-01-24	2458.78	2	6.04025
2012-01-25	2466.95	3	0.331728
2012-01-26	2488.66	4	0.876184
2012-01-27	2446.25	5	-1.71882
2012-01-30	2330.95	1	-4.82803
2012-01-31	2348.67	2	0.75733
2012-02-01	2283.01	3	-2.83545
2012-02-02	2282.23	4	-0.0341713
2012-02-03	2364.61	5	3.54601
2012-02-06	2321.6	1	-1.83565
2012-02-07	2322.49	2	0.0383283
2012-02-08	2312.36	3	-0.437124
2012-02-09	2279.11	4	-1.44836
2012-02-10	2202.25	5	-3.43055
2012-02-13	2248.1	1	2.06059
2012-02-14	2305.99	2	2.54247
2012-02-15	2427.02	3	5.11541
2012-02-16	2433.72	4	0.275678
2012-02-17	2375.43	5	-2.42425
2012-02-20	2408.09	1	1.36554
2012-02-21	2461.53	2	2.19492
2012-02-22	2470.08	3	0.346743
2012-02-23	2377.71	4	-3.81127
2012-02-24	2394.92	5	0.721199
2012-02-27	2434.01	1	1.61903
2012-02-28	2401.59	2	-1.34091
2012-02-29	2375.19	3	-1.10536
2012-03-01	2398.25	4	0.966187
2012-03-02	2365.93	5	-1.35681
2012-03-05	2325.22	1	-1.73565
2012-03-06	2319.29	2	-0.255355
2012-03-07	2324.88	3	0.240732
2012-03-08	2420.73	4	4.04007
2012-03-09	2438.22	5	0.719912
2012-03-12	2416.35	1	-0.901013
2012-03-13	2409.58	2	-0.280568
2012-03-14	2357.41	3	-2.18889
2012-03-15	2266.51	4	-3.93224
2012-03-16	2302.56	5	1.57803
2012-03-19	2341.3	1	1.66848
2012-03-20	2410.99	2	2.93311
2012-03-21	2391.45	3	-0.813757
2012-03-22	2329.5	4	-2.62462
2012-03-23	2348.5	5	0.812317
2012-03-26	2389.28	1	1.72152
2012-03-27	2407.85	2	0.774217
2012-03-28	2359.76	3	-2.01743
2012-03-29	2292.03	4	-2.9122
2012-03-30	2287.92	5	-0.179478
2012-04-02	2269.22	1	-0.820695
2012-04-03	2223.98	2	-2.01378
2012-04-04	2171.74	3	-2.37697
2012-04-05	2182.66	4	0.501563
2012-04-06	2171.74	5	-0.501563
2012-04-09	2182.66	1	0.501563
2012-04-10	2133.17	2	-2.29352
2012-04-11	2155.3	3	1.03208
2012-04-12	2205.78	4	2.31513
2012-04-13	2256.98	5	2.29464
2012-04-16	2283.82	1	1.18218
2012-04-17	2333.71	2	2.16098
2012-04-18	2318.45	3	-0.656042
2012-04-19	2291.31	4	-1.17752
2012-04-20	2337.56	5	1.99839
2012-04-23	2272.19	1	-2.83635
2012-04-24	2341.24	2	2.99366
2012-04-25	2322.71	3	-0.79461
2012-04-26	2352.94	4	1.2931
2012-04-27	2389.75	5	1.55231
2012-04-30	2313.24	1	-3.25396
2012-05-01	2395.17	2	3.48051
2012-05-02	2424.44	3	1.21464
2012-05-03	2378.42	4	-1.91642
2012-05-04	2366.47	5	-0.503701
2012-05-07	2411.25	1	1.87459
2012-05-08	2394.16	2	-0.711285
2012-05-09	2403.12	3	0.373545
2012-05-10	2406.17	4	0.126838
2012-05-11	2388.98	5	-0.716978
2012-05-14	2324.47	1	-2.73744
2012-05-15	2341.87	2	0.74577
2012-05-16	2366.13	3	1.0306
2012-05-17	2317.62	4	-2.07149
2012-05-18	2348.33	5	1.31636
2012-05-21	2321.89	1	-1.13229
2012-05-22	2266.86	2	-2.39859
2012-05-23	2210.87	3	-2.50095
2012-05-24	2210.67	4	-0.00904662
2012-05-25	2204.95	5	-0.25908
2012-05-28	2208.22	1	0.148193
2012-05-29	2199.68	2	-0.387487
2012-05-30	2159.72	3	-1.83333
2012-05-31	2171.03	4	0.522313
2012-06-01	2150.95	5	-0.92921
2012-06-04	2214.74	1	2.92254
2012-06-05	2214.74	2	0
2012-06-06	2266.71	3	2.31944
2012-06-07	2281.79	4	0.663078
2012-06-08	2271.55	5	-0.44978
2012-06-11	2263.43	1	-0.358106
2012-06-12	2314.68	2	2.23901
2012-06-13	2333.18	3	0.796069
2012-06-14	2335.15	4	0.0843985
2012-06-15	2317.31	5	-0.76691
2012-06-18	2261.9	1	-2.42019
2012-06-19	2299.04	2	1.62865
2012-06-20	2248.92	3	-2.20415
2012-06-21	2222	4	-1.20424
2012-06-22	2185.55	5	-1.65402
2012-06-25	2188.49	1	0.13443
2012-06-26	2230.87	2	1.91798
2012-06-27	2303.87	3	3.21987
2012-06-28	2307.68	4	0.165237
2012-06-29	2368.34	5	2.59466
2012-07-02	2373.99	1	0.23828
2012-07-03	2405.27	2	1.30901
2012-07-04	2385.68	3	-0.817796
2012-07-05	2390.22	4	0.190121
2012-07-06	2329	5	-2.59464
2012-07-09	2393.62	1	2.73679
2012-07-10	2388.08	2	-0.231717
2012-07-11	2376.6	3	-0.48188
2012-07-12	2265.86	4	-4.77165
2012-07-13	2295.95	5	1.31923
2012-07-16	2277.91	1	-0.788835
2012-07-17	2277.2	2	-0.0311738
2012-07-18	2281.76	3	0.200046
2012-07-19	2315.86	4	1.4834
2012-07-20	2318.89	5	0.130751
2012-07-23	2322.46	1	0.153835
2012-07-24	2301.22	2	-0.918755
2012-07-25	2315.89	3	0.635465
2012-07-26	2386.09	4	2.9862
2012-07-27	2413.5	5	1.14219
2012-07-30	2423.63	1	0.418844
2012-07-31	2457.33	2	1.3809
2012-08-01	2478.87	3	0.872742
2012-08-02	2454.06	4	-1.0059
2012-08-03	2477.04	5	0.93205
2012-08-06	2476.03	1	-0.0407828
2012-08-07	2516.44	2	1.61887
2012-08-08	2532.47	3	0.634991
2012-08-09	2532.66	4	0.00750228
2012-08-10	2513.49	5	-0.759791
2012-08-13	2459.74	1	-2.16166
2012-08-14	2505.76	2	1.85364
2012-08-15	2504.55	3	-0.0483004
2012-08-16	2469.85	4	-1.39517
2012-08-17	2501.72	5	1.28211
2012-08-20	2458.33	1	-1.74962
2012-08-21	2487.86	2	1.19406
2012-08-22	2504.55	3	0.668617
2012-08-23	2437.19	4	-2.72633
2012-08-24	2437.19	5	0
2012-08-27	2528.39	1	3.6737
2012-08-28	2619.63	2	3.54503
2012-08-29	2627.6	3	0.30378
2012-08-30	2652.05	4	0.926204
2012-08-31	2647.38	5	-0.176245
2012-09-03	2610.72	1	-1.39444
2012-09-04	2601.29	2	-0.361857
2012-09-05	2692.73	3	3.45481
2012-09-06	2719.35	4	0.983733
2012-09-07	2710.02	5	-0.343687
2012-09-10	2692.48	1	-0.649331
2012-09-11	2666.66	2	-0.963595
2012-09-12	2676.62	3	0.372805
2012-09-13	2663.69	4	-0.484242
2012-09-14	2689.61	5	0.968382
2012-09-17	2634.15	1	-2.08357
2012-09-18	2588.73	2	-1.73931
2012-09-19	2595.93	3	0.277743
2012-09-20	2579.72	4	-0.626397
2012-09-21	2583.55	5	0.148356
2012-09-24	2510.77	1	-2.85749
2012-09-25	2541.46	2	1.21492
2012-09-26	2529.28	3	-0.480404
2012-09-27	2547.98	4	0.736621
2012-09-28	2570.94	5	0.89707
2012-10-01	2501.72	1	-2.72931
2012-10-02	2538.33	2	1.45279
2012-10-03	2480.66	3	-2.29817
2012-10-04	2446.19	4	-1.39929
2012-10-05	2437.09	5	-0.372701
2012-10-08	2438.35	1	0.0516876
2012-10-09	2466.22	2	1.1365
2012-10-10	2428.01	3	-1.56146
2012-10-11	2407.82	4	-0.835022
2012-10-12	2422.96	5	0.626816
2012-10-15	2407.04	1	-0.659216
2012-10-16	2465.1	2	2.38346
2012-10-17	2438.11	3	-1.10092
2012-10-18	2483.71	4	1.85303
2012-10-19	2530.64	5	1.87188
2012-10-22	2562.94	1	1.26828
2012-10-23	2546.09	2	-0.659619
2012-10-24	2457.65	3	-3.53532
2012-10-25	2459.71	4	0.0837848
2012-10-26	2444.25	5	-0.630513
2012-10-29	2411.99	1	-1.32862
2012-10-30	2441.03	2	1.19679
2012-10-31	2445.71	3	0.191539
2012-11-01	2472.42	4	1.0862
2012-11-02	2494.07	5	0.871849
2012-11-05	2487.26	1	-0.273421
2012-11-06	2503.35	2	0.644813
2012-11-07	2440.61	3	-2.53818
2012-11-08	2386.13	4	-2.25752
2012-11-09	2408.93	5	0.950986
2012-11-12	2417.12	1	0.339408
2012-11-13	2420.73	2	0.14924
2012-11-14	2494.91	3	3.01835
2012-11-15	2515.45	4	0.819906
2012-11-16	2439.9	5	-3.04947
2012-11-19	2456.47	1	0.676831
2012-11-20	2492.06	2	1.43843
2012-11-21	2506.52	3	0.578566
2012-11-22	2504.71	4	-0.0722378
2012-11-23	2541.46	5	1.45658
2012-11-26	2515.59	1	-1.02314
2012-11-27	2480.58	2	-1.4015
2012-11-28	2492.42	3	0.476172
2012-11-29	2520.07	4	1.10326
2012-11-30	2528.86	5	0.348193
2012-12-03	2550.71	1	0.860314
2012-12-04	2471.22	2	-3.16598
2012-12-05	2457.91	3	-0.540056
2012-12-06	2459.76	4	0.0752389
2012-12-07	2451.47	5	-0.337594
2012-12-10	2421.33	1	-1.23709
2012-12-11	2424.5	2	0.130834
2012-12-12	2479.45	3	2.24114
2012-12-13	2453.17	4	-1.06557
2012-12-14	2472.34	5	0.7784
2012-12-17	2457.41	1	-0.605712
2012-12-18	2434.29	2	-0.945282
2012-12-19	2400.43	3	-1.40072
2012-12-20	2385.06	4	-0.642361
2012-12-21	2355.12	5	-1.26326
2012-12-24	2324.99	1	-1.28759
2012-12-25	2324.99	2	0
2012-12-26	2317.42	3	-0.326124
2012-12-27	2300.15	4	-0.748016
2012-12-28	2298.02	5	-0.0926456
2012-12-31	2292.1	1	-0.257945
2013-01-01	2292.1	2	0
2013-01-02	2299.39	3	0.317544
2013-01-03	2295.35	4	-0.175853
2013-01-04	2263.95	5	-1.37743
2013-01-07	2302.65	1	1.69496
2013-01-08	2257.53	2	-1.97893
2013-01-09	2267.02	3	0.41949
2013-01-10	2307.2	4	1.75685
2013-01-11	2298.29	5	-0.38693
2013-01-14	2305.63	1	0.318859
2013-01-15	2311.71	2	0.263355
2013-01-16	2299.05	3	-0.549152
2013-01-17	2339.79	4	1.75652
2013-01-18	2323.3	5	-0.707259
2013-01-21	2302.45	1	-0.901482
2013-01-22	2262.7	2	-1.7415
2013-01-23	2263.53	3	0.0366751
2013-01-24	2241.23	4	-0.990072
2013-01-25	2216.09	5	-1.12804
2013-01-28	2207.77	1	-0.376143
2013-01-29	2236.04	2	1.27235
2013-01-30	2218.86	3	-0.771289
2013-01-31	2240.07	4	0.951356
2013-02-01	2239.24	5	-0.0370593
2013-02-04	2228.67	1	-0.473153
2013-02-05	2273.3	2	1.98275
2013-02-06	2255.05	3	-0.806037
2013-02-07	2268.08	4	0.576151
2013-02-08	2257.42	5	-0.471109
2013-02-11	2202.48	1	-2.46386
2013-02-12	2199.95	2	-0.114937
2013-02-13	2197.5	3	-0.111428
2013-02-14	2178.91	4	-0.84956
2013-02-15	2184.15	5	0.240199
2013-02-18	2167.4	1	-0.769844
2013-02-19	2159.34	2	-0.372567
2013-02-20	2149.08	3	-0.476278
2013-02-21	2167.16	4	0.837771
2013-02-22	2174.52	5	0.33904
2013-02-25	2173.34	1	-0.0542796
2013-02-26	2153.72	2	-0.906858
2013-02-27	2156.77	3	0.141515
2013-02-28	2168	4	0.519335
2013-03-01	2114.23	5	-2.51144
2013-03-04	2092.36	1	-1.03981
2013-03-05	2096.59	2	0.20196
2013-03-06	2081.69	3	-0.713215
2013-03-07	2100.5	4	0.899535
2013-03-08	2149.08	5	2.28644
2013-03-11	2159.63	1	0.489707
2013-03-12	2182.39	2	1.04837
2013-03-13	2177.52	3	-0.223399
2013-03-14	2165.82	4	-0.538757
2013-03-15	2149.06	5	-0.776851
2013-03-18	2128.47	1	-0.962713
2013-03-19	2136.24	2	0.364386
2013-03-20	2184.14	3	2.21749
2013-03-21	2199.78	4	0.71352
2013-03-22	2198.15	5	-0.0741258
2013-03-25	2169.27	1	-1.32254
2013-03-26	2184.69	2	0.708324
2013-03-27	2185.83	3	0.0521677
2013-03-28	2211.74	4	1.17839
2013-03-29	2211.74	5	0
2013-04-01	2221	1	0.417801
2013-04-02	2210.69	2	-0.465286
2013-04-03	2188.04	3	-1.02985
2013-04-04	2180.8	4	-0.331438
2013-04-05	2176.25	5	-0.208857
2013-04-08	2226.29	1	2.27333
2013-04-09	2254.85	2	1.27469
2013-04-10	2247.53	3	-0.325162
2013-04-11	2266.91	4	0.858584
2013-04-12	2290.79	5	1.04791
2013-04-15	2294.39	1	0.157028
2013-04-16	2337.29	2	1.85251
2013-04-17	2337.45	3	0.0068453
2013-04-18	2342.59	4	0.219656
2013-04-19	2358.09	5	0.659481
2013-04-22	2332.57	1	-1.08813
2013-04-23	2347.04	2	0.61843
2013-04-24	2351.88	3	0.206005
2013-04-25	2385.59	4	1.42315
2013-04-26	2386.89	5	0.054479
2013-04-29	2358.11	1	-1.21308
2013-04-30	2383.71	2	1.07976
2013-05-01	2433.28	3	2.0582
2013-05-02	2425.43	4	-0.323131
2013-05-03	2433.57	5	0.335049
2013-05-06	2426.31	1	-0.298773
2013-05-07	2420.68	2	-0.232309
2013-05-08	2417.31	3	-0.139314
2013-05-09	2378.75	4	-1.60802
2013-05-10	2329.29	5	-2.10116
2013-05-13	2358.23	1	1.23478
2013-05-14	2377.84	2	0.828117
2013-05-15	2366.77	3	-0.466636
2013-05-16	2323.33	4	-1.85247
2013-05-17	2330.1	5	0.290968
2013-05-20	2327.89	1	-0.0948907
2013-05-21	2366.46	2	1.64329
2013-05-22	2333.48	3	-1.40345
2013-05-23	2301.45	4	-1.38214
2013-05-24	2279.84	5	-0.943409
2013-05-27	2279.84	1	0
2013-05-28	2240.82	2	-1.72634
2013-05-29	2248.15	3	0.326579
2013-05-30	2253.21	4	0.224821
2013-05-31	2233.85	5	-0.862931
2013-06-03	2283.49	1	2.19784
2013-06-04	2311.06	2	1.20013
2013-06-05	2344.23	3	1.42507
2013-06-06	2402.77	4	2.46652
2013-06-07	2393.86	5	-0.371511
2013-06-10	2394.48	1	0.0258962
2013-06-11	2390.96	2	-0.147113
2013-06-12	2401.98	3	0.459844
2013-06-13	2340.34	4	-2.59972
2013-06-14	2279.81	5	-2.62041
2013-06-17	2256.76	1	-1.01619
2013-06-18	2251.37	2	-0.239124
2013-06-19	2250.35	3	-0.045316
2013-06-20	2197.66	4	-2.36926
2013-06-21	2193.33	5	-0.197222
2013-06-24	2185.34	1	-0.364951
2013-06-25	2200.35	2	0.684502
2013-06-26	2205.74	3	0.244661
2013-06-27	2187.35	4	-0.837229
2013-06-28	2200.44	5	0.596657
2013-07-01	2190.12	1	-0.4701
2013-07-02	2214.32	2	1.0989
2013-07-03	2268.41	3	2.41338
2013-07-04	2268.41	4	0
2013-07-05	2239.09	5	-1.30096
2013-07-08	2212.87	1	-1.17792
2013-07-09	2228.32	2	0.695762
2013-07-10	2224.57	3	-0.16843
2013-07-11	2286.54	4	2.74761
2013-07-12	2282.58	5	-0.173338
2013-07-15	2283.58	1	0.0438005
2013-07-16	2333.65	2	2.16892
2013-07-17	2342.62	3	0.38364
2013-07-18	2384.05	4	1.75308
2013-07-19	2399.26	5	0.635963
2013-07-22	2390.03	1	-0.385444
2013-07-23	2398.4	2	0.349593
2013-07-24	2401.36	3	0.12334
2013-07-25	2389.04	4	-0.514363
2013-07-26	2374.03	5	-0.630268
2013-07-29	2323.18	1	-2.1652
2013-07-30	2327.84	2	0.200386
2013-07-31	2336.93	3	0.38973
2013-08-01	2339.61	4	0.114615
2013-08-02	2334.48	5	-0.219508
2013-08-05	2410.32	1	3.19704
2013-08-06	2417.85	2	0.31192
2013-08-07	2484.8	3	2.73135
2013-08-08	2516.74	4	1.27722
2013-08-09	2506.39	5	-0.412094
2013-08-12	2519.98	1	0.540749
2013-08-13	2482.57	2	-1.49567
2013-08-14	2520.19	3	1.504
2013-08-15	2518.09	4	-0.0833618
2013-08-16	2527.65	5	0.378934
2013-08-19	2546.45	1	0.741022
2013-08-20	2546.61	2	0.00628306
2013-08-21	2484.7	3	-2.46111
2013-08-22	2489.04	4	0.174517
2013-08-23	2498.22	5	0.368138
2013-08-26	2503.46	1	0.20953
2013-08-27	2483.27	2	-0.809753
2013-08-28	2526.21	3	1.71439
2013-08-29	2508.29	4	-0.711891
2013-08-30	2474.44	5	-1.35871
2013-09-02	2464.06	1	-0.420371
2013-09-03	2455.9	2	-0.33171
2013-09-04	2533.7	3	3.11874
2013-09-05	2601.71	4	2.64882
2013-09-06	2602.38	5	0.025749
2013-09-09	2592.1	1	-0.395805
2013-09-10	2602.18	2	0.38812
2013-09-11	2607.48	3	0.203468
2013-09-12	2624.87	4	0.664713
2013-09-13	2636.45	5	0.440194
2013-09-16	2673.03	1	1.37793
2013-09-17	2651.09	2	-0.824178
2013-09-18	2661.39	3	0.387767
2013-09-19	2669.32	4	0.297522
2013-09-20	2650.92	5	-0.691701
2013-09-23	2648.29	1	-0.0992601
2013-09-24	2644.41	2	-0.146617
2013-09-25	2615.7	3	-1.09162
2013-09-26	2640.08	4	0.927747
2013-09-27	2679.67	5	1.48844
2013-09-30	2682.35	1	0.0999623
2013-10-01	2671.62	2	-0.400825
2013-10-02	2669.22	3	-0.0898735
2013-10-03	2623.22	4	-1.73837
2013-10-04	2655.77	5	1.23321
2013-10-07	2736.73	1	3.00291
2013-10-08	2753.41	2	0.607637
2013-10-09	2736.31	3	-0.622985
2013-10-10	2762.75	4	0.961626
2013-10-11	2778.02	5	0.551188
2013-10-14	2747.93	1	-1.08905
2013-10-15	2792.1	2	1.59461
2013-10-16	2774.91	3	-0.617569
2013-10-17	2801.96	4	0.970086
2013-10-18	2751.76	5	-1.80785
2013-10-21	2755.96	1	0.152513
2013-10-22	2797.72	2	1.5039
2013-10-23	2742.96	3	-1.97672
2013-10-24	2719.04	4	-0.875875
2013-10-25	2743.13	5	0.882073
2013-10-28	2714.78	1	-1.03887
2013-10-29	2688.8	2	-0.961592
2013-10-30	2687.19	3	-0.0598959
2013-10-31	2700.74	4	0.502977
2013-11-01	2679.56	5	-0.787321
2013-11-04	2679.39	1	-0.00634453
2013-11-05	2759.52	2	2.94676
2013-11-06	2757.6	3	-0.0696015
2013-11-07	2712.62	4	-1.64458
2013-11-08	2693.06	5	-0.723686
2013-11-11	2623.03	1	-2.6348
2013-11-12	2649.5	2	1.00408
2013-11-13	2703.06	3	2.00135
2013-11-14	2710.08	4	0.259369
2013-11-15	2760.38	5	1.83902
2013-11-18	2804.25	1	1.57678
2013-11-19	2818.52	2	0.50758
2013-11-20	2834.77	3	0.574888
2013-11-21	2821.74	4	-0.460709
2013-11-22	2821.72	5	-0.000708785
2013-11-25	2821.6	1	-0.00425282
2013-11-26	2796.35	2	-0.89891
2013-11-27	2789.56	3	-0.243112
2013-11-28	2807.06	4	0.625379
2013-11-29	2815.27	5	0.29205
2013-12-02	2839.45	1	0.85522
2013-12-03	2835.63	2	-0.134624
2013-12-04	2804.6	3	-1.10032
2013-12-05	2788.69	4	-0.568897
2013-12-06	2837.88	5	1.74853
2013-12-09	2790.74	1	-1.67505
2013-12-10	2806.89	2	0.577032
2013-12-11	2796.6	3	-0.367272
2013-12-12	2830.82	4	1.2162
2013-12-13	2817.85	5	-0.459224
2013-12-16	2835.61	1	0.62829
2013-12-17	2823.02	2	-0.444985
2013-12-18	2829.15	3	0.216908
2013-12-19	2841.29	4	0.428186
2013-12-20	2865.27	5	0.840441
2013-12-23	2859.87	1	-0.188642
2013-12-24	2859.87	2	0
2013-12-25	2859.87	3	0
2013-12-26	2859.87	4	0
2013-12-27	2859.87	5	0
2013-12-30	2773.02	1	-3.08392
2013-12-31	2783.68	2	0.383681
2014-01-01	2783.68	3	0
2014-01-02	2699.79	4	-3.05998
2014-01-03	2760.56	5	2.22596
2014-01-06	2729.87	1	-1.11796
2014-01-07	2742.01	2	0.443724
2014-01-08	2763.8	3	0.791532
2014-01-09	2750.32	4	-0.488928
2014-01-10	2778	5	1.0014
2014-01-13	2775.86	1	-0.0770635
2014-01-14	2815.34	2	1.41224
2014-01-15	2810.6	3	-0.168505
2014-01-16	2814.55	4	0.140441
2014-01-17	2760.91	5	-1.92421
2014-01-20	2760.91	1	0
2014-01-21	2746.96	2	-0.506549
2014-01-22	2768.07	3	0.765548
2014-01-23	2863.47	4	3.38838
2014-01-24	2852.93	5	-0.368764
2014-01-27	2955.52	1	3.53281
2014-01-28	2964.65	2	0.308437
2014-01-29	2977.06	3	0.417725
2014-01-30	2973.08	4	-0.133778
2014-01-31	2960.04	5	-0.439567
2014-02-03	2971.95	1	0.401552
2014-02-04	2941.47	2	-1.03088
2014-02-05	2942.43	3	0.0326314
2014-02-06	2950.32	4	0.267787
2014-02-07	2987.82	5	1.26304
2014-02-10	2980.21	1	-0.255026
2014-02-11	2989.55	2	0.312911
2014-02-12	3022.69	3	1.10243
2014-02-13	3015.5	4	-0.238151
2014-02-14	3029.68	5	0.469135
2014-02-17	3021.39	1	-0.274001
2014-02-18	3013.53	2	-0.260484
2014-02-19	2993.96	3	-0.651522
2014-02-20	3031.04	4	1.23089
2014-02-21	3006.37	5	-0.817242
2014-02-24	3007	1	0.0209533
2014-02-25	2975.33	2	-1.05879
2014-02-26	2983.93	3	0.288627
2014-02-27	3005.5	4	0.720272
2014-02-28	3017.61	5	0.402118
2014-03-03	2983.04	1	-1.15222
2014-03-04	3015	2	1.06569
2014-03-05	3031.72	3	0.553029
2014-03-06	3025.11	4	-0.218266
2014-03-07	3042.58	5	0.575839
2014-03-10	3042.13	1	-0.0147912
2014-03-11	3064	2	0.716332
2014-03-12	3016.55	3	-1.56075
2014-03-13	3064.16	4	1.56597
2014-03-14	3055.77	5	-0.274186
2014-03-17	3089.17	1	1.08708
2014-03-18	3077.89	2	-0.365815
2014-03-19	3090.42	3	0.406271
2014-03-20	3044.64	4	-1.49243
2014-03-21	3029.48	5	-0.499168
2014-03-24	3014.63	1	-0.491388
2014-03-25	3028.46	2	0.457714
2014-03-26	3035.9	3	0.245368
2014-03-27	3027.69	4	-0.270797
2014-03-28	3062.5	5	1.14316
2014-03-31	3034.16	1	-0.929696
2014-04-01	3021.27	2	-0.425734
2014-04-02	3001.09	3	-0.670172
2014-04-03	2999.09	4	-0.0666647
2014-04-04	3044.78	5	1.51197
2014-04-07	3038.9	1	-0.193304
2014-04-08	3070.85	2	1.04588
2014-04-09	3088.63	3	0.577323
2014-04-10	3059.51	4	-0.947285
2014-04-11	3066.66	5	0.233425
2014-04-14	3066.18	1	-0.0156534
2014-04-15	3049.36	2	-0.550075
2014-04-16	3049.15	3	-0.00688693
2014-04-17	3090.48	4	1.34636
2014-04-18	3090.48	5	0
2014-04-21	3075.93	1	-0.471912
2014-04-22	3076.42	2	0.0159289
2014-04-23	3084.52	3	0.262947
2014-04-24	3049.45	4	-1.14348
2014-04-25	3031.51	5	-0.59004
2014-04-28	3022.71	1	-0.290707
2014-04-29	3027.21	2	0.148762
2014-04-30	3049.18	3	0.72313
2014-05-01	3003.7	4	-1.50278
2014-05-02	2999.03	5	-0.155596
2014-05-05	3000.8	1	0.0590017
2014-05-06	3005.85	2	0.168147
2014-05-07	2980.93	3	-0.832506
2014-05-08	2976.61	4	-0.145026
2014-05-09	2946.7	5	-1.00992
2014-05-12	2950.38	1	0.124808
2014-05-13	2980.67	2	1.02141
2014-05-14	2974.68	3	-0.201164
2014-05-15	2986.11	4	0.383507
2014-05-16	3003.28	5	0.573349
2014-05-19	3016.78	1	0.448501
2014-05-20	3048.29	2	1.03907
2014-05-21	3064.29	3	0.523512
2014-05-22	3085.73	4	0.697236
2014-05-23	3107.05	5	0.688546
2014-05-26	3107.05	1	0
2014-05-27	3113.55	2	0.208983
2014-05-28	3110.24	3	-0.106366
2014-05-29	3125.77	4	0.498076
2014-05-30	3149.45	5	0.754718
2014-06-02	3147.17	1	-0.0724198
2014-06-03	3154.17	2	0.222175
2014-06-04	3169.54	3	0.486108
2014-06-05	3175.39	4	0.184399
2014-06-06	3159.01	5	-0.517177
2014-06-09	3169.95	1	0.345713
2014-06-10	3172.66	2	0.0854538
2014-06-11	3201.05	3	0.890853
2014-06-12	3158.46	4	-1.33943
2014-06-13	3202.58	5	1.38722
2014-06-16	3183.92	1	-0.584359
2014-06-17	3186.16	2	0.0703288
2014-06-18	3193.07	3	0.216641
2014-06-19	3189.48	4	-0.112494
2014-06-20	3185.63	5	-0.120782
2014-06-23	3163.29	1	-0.703745
2014-06-24	3131.51	2	-1.00973
2014-06-25	3152.14	3	0.656627
2014-06-26	3137.77	4	-0.456923
2014-06-27	3214.66	5	2.42092
2014-06-30	3213.27	1	-0.0432488
2014-07-01	3201.59	2	-0.364155
2014-07-02	3204.82	3	0.100837
2014-07-03	3186.62	4	-0.569513
2014-07-04	3186.62	5	0
2014-07-07	3174.18	1	-0.391146
2014-07-08	3195.7	2	0.675682
2014-07-09	3164.13	3	-0.992802
2014-07-10	3165.7	4	0.0496064
2014-07-11	3172.65	5	0.2193
2014-07-14	3162.5	1	-0.320435
2014-07-15	3182.08	2	0.617222
2014-07-16	3150.09	3	-1.0104
2014-07-17	3144.91	4	-0.164575
2014-07-18	3166.13	5	0.672475
2014-07-21	3194.34	1	0.887047
2014-07-22	3197.81	2	0.108571
2014-07-23	3234.01	3	1.12567
2014-07-24	3229.91	4	-0.126858
2014-07-25	3234.54	5	0.143245
2014-07-28	3218.15	1	-0.508006
2014-07-29	3229.7	2	0.358259
2014-07-30	3255.65	3	0.800269
2014-07-31	3263.15	4	0.230104
2014-08-01	3254.88	5	-0.253758
2014-08-04	3251.52	1	-0.103283
2014-08-05	3258.58	2	0.216894
2014-08-06	3276.18	3	0.538659
2014-08-07	3287.73	4	0.351925
2014-08-08	3279.08	5	-0.263446
2014-08-11	3285.13	1	0.184333
2014-08-12	3298.57	2	0.408282
2014-08-13	3295.91	3	-0.0806735
2014-08-14	3297.72	4	0.0549015
2014-08-15	3286.77	5	-0.3326
2014-08-18	3299.53	1	0.387471
2014-08-19	3252.74	2	-1.42823
2014-08-20	3271.88	3	0.586703
2014-08-21	3243.05	4	-0.88505
2014-08-22	3242.24	5	-0.0249796
2014-08-25	3264.31	1	0.678396
2014-08-26	3262.76	2	-0.0474945
2014-08-27	3249.29	3	-0.413695
2014-08-28	3265.48	4	0.497025
2014-08-29	3252.3	5	-0.404433
2014-09-01	3235.49	1	-0.518205
2014-09-02	3196.59	2	-1.20958
2014-09-03	3187.81	3	-0.275046
2014-09-04	3172.48	4	-0.482054
2014-09-05	3137.46	5	-1.11001
2014-09-08	3105.44	1	-1.02581
2014-09-09	3118.53	2	0.420632
2014-09-10	3108.64	3	-0.317641
2014-09-11	3087.36	4	-0.686897
2014-09-12	3118.74	5	1.01127
2014-09-15	3118.83	1	0.00288574
2014-09-16	3133.22	2	0.46033
2014-09-17	3199.97	3	2.10802
2014-09-18	3238.56	4	1.19874
2014-09-19	3296.53	5	1.77416
2014-09-22	3356.62	1	1.80641
2014-09-23	3324.63	2	-0.957613
2014-09-24	3393.51	3	2.05064
2014-09-25	3353.48	4	-1.18662
2014-09-26	3329.88	5	-0.706235
2014-09-29	3330.18	1	0.00900893
2014-09-30	3313.46	2	-0.50334
2014-10-01	3196.56	3	-3.59177
2014-10-02	3121.25	4	-2.38417
2014-10-03	3095.64	5	-0.823889
2014-10-06	3115.44	1	0.637572
2014-10-07	3094.43	2	-0.676667
2014-10-08	3079.02	3	-0.499236
2014-10-09	3096.69	4	0.572243
2014-10-10	3178.88	5	2.61951
2014-10-13	3103.36	1	-2.40435
2014-10-14	3140.57	2	1.19189
2014-10-15	3174.83	3	1.08498
2014-10-16	3121.44	4	-1.69597
2014-10-17	3154.98	5	1.06877
2014-10-20	3161.98	1	0.221626
2014-10-21	3150.84	2	-0.352933
2014-10-22	3148.53	3	-0.0733407
2014-10-23	3147.15	4	-0.0438396
2014-10-24	3088.12	5	-1.89348
2014-10-27	3017.01	1	-2.32962
2014-10-28	2982.01	2	-1.16687
2014-10-29	2991.46	3	0.316399
2014-10-30	3000.75	4	0.310069
2014-10-31	2958.08	5	-1.43218
2014-11-03	2924.69	1	-1.13519
2014-11-04	2944.88	2	0.687958
2014-11-05	2933.04	3	-0.402864
2014-11-06	2939.79	4	0.229872
2014-11-07	2945.32	5	0.187932
2014-11-10	2963.23	1	0.606242
2014-11-11	2982.52	2	0.648869
2014-11-12	2917.6	3	-2.20072
2014-11-13	2880.28	4	-1.28738
2014-11-14	2862.71	5	-0.611878
2014-11-17	2871.1	1	0.29265
2014-11-18	2858.59	2	-0.436674
2014-11-19	2877.51	3	0.659684
2014-11-20	2874.64	4	-0.0997888
2014-11-21	2872.88	5	-0.0612438
2014-11-24	2912.76	1	1.37861
2014-11-25	2873.32	2	-1.36329
2014-11-26	2925.23	3	1.7905
2014-11-27	2921.81	4	-0.116982
2014-11-28	2899.92	5	-0.752014
2014-12-01	2944.33	1	1.51981
2014-12-02	2905.19	2	-1.33825
2014-12-03	2902.98	3	-0.0760997
2014-12-04	2917.34	4	0.493445
2014-12-05	2937.8	5	0.698876
2014-12-08	2945.25	1	0.25327
2014-12-09	2982.6	2	1.26017
2014-12-10	2966.52	3	-0.540585
2014-12-11	2894.21	4	-2.46774
2014-12-12	2902.37	5	0.281546
2014-12-15	2914.81	1	0.427699
2014-12-16	2952.21	2	1.27494
2014-12-17	2952.92	3	0.0240469
2014-12-18	2992.68	4	1.33748
2014-12-19	3005.92	5	0.441437
2014-12-22	3010.11	1	0.139295
2014-12-23	3010.11	2	0
2014-12-24	3010.11	3	0
2014-12-25	3010.11	4	0
2014-12-26	3010.11	5	0
2014-12-29	3010.11	1	0
2014-12-30	3010.11	2	0
2014-12-31	2970.86	3	-1.31251
2015-01-01	2970.86	4	0
2015-01-02	2971.75	5	0.0299532
2015-01-05	2973.07	1	0.0444084
2015-01-06	2933.67	2	-1.33409
2015-01-07	2946.87	3	0.448939
2015-01-08	3005.38	4	1.96604
2015-01-09	2989.09	5	-0.543502
2015-01-12	3024.03	1	1.16214
2015-01-13	3018.58	2	-0.180386
2015-01-14	3026.85	3	0.273595
2015-01-15	3009.87	4	-0.562559
2015-01-16	2982.59	5	-0.910484
2015-01-19	2982.59	1	0
2015-01-20	2968.84	2	-0.462075
2015-01-21	2906.19	3	-2.13284
2015-01-22	2860.76	4	-1.57556
2015-01-23	2819.72	5	-1.44497
2015-01-26	2802.32	1	-0.618994
2015-01-27	2813.83	2	0.40989
2015-01-28	2787.03	3	-0.957003
2015-01-29	2759.69	4	-0.985816
2015-01-30	2761.1	5	0.0510796
2015-02-02	2744.64	1	-0.597923
2015-02-03	2778	2	1.20813
2015-02-04	2807.45	3	1.05454
2015-02-05	2836.56	4	1.03155
2015-02-06	2859.43	5	0.803025
2015-02-09	2934.81	1	2.60204
2015-02-10	2929.14	2	-0.193385
2015-02-11	2948.1	3	0.645203
2015-02-12	2993.47	4	1.52724
2015-02-13	2992.4	5	-0.0357509
2015-02-16	2964.29	1	-0.94382
2015-02-17	2976.25	2	0.402658
2015-02-18	3003.93	3	0.925731
2015-02-19	3000.14	4	-0.126248
2015-02-20	3013.09	5	0.430718
2015-02-23	3037.07	1	0.79271
2015-02-24	3049.79	2	0.41795
2015-02-25	3000.56	3	-1.62738
2015-02-26	3016.86	4	0.541762
2015-02-27	3050.52	5	1.10955
2015-03-02	3042.38	1	-0.267196
2015-03-03	3061.7	2	0.633021
2015-03-04	3034.14	3	-0.904229
2015-03-05	3027.89	4	-0.206202
2015-03-06	2974.18	5	-1.78976
2015-03-09	2969.34	1	-0.162866
2015-03-10	2948.93	2	-0.689731
2015-03-11	2887.44	3	-2.10721
2015-03-12	2885.7	4	-0.0602792
2015-03-13	2867.88	5	-0.619442
2015-03-16	2843.96	1	-0.837563
2015-03-17	2837.86	2	-0.21472
2015-03-18	2804.98	3	-1.16538
2015-03-19	2769.67	4	-1.26682
2015-03-20	2838.43	5	2.45229
2015-03-23	2813.3	1	-0.889291
2015-03-24	2832.37	2	0.675565
2015-03-25	2834.61	3	0.0790545
2015-03-26	2817.01	4	-0.622832
2015-03-27	2801.34	5	-0.557816
2015-03-30	2751.23	1	-1.80498
2015-03-31	2764.77	2	0.490936
2015-04-01	2795.9	3	1.11966
2015-04-02	2817.78	4	0.779528
2015-04-03	2817.78	5	0
2015-04-06	2837.15	1	0.685069
2015-04-07	2832.72	2	-0.156265
2015-04-08	2844.03	3	0.398468
2015-04-09	2828.15	4	-0.559927
2015-04-10	2814.17	5	-0.495542
2015-04-13	2835.54	1	0.756503
2015-04-14	2879.73	2	1.54641
2015-04-15	2844.94	3	-1.21546
2015-04-16	2895.12	4	1.74846
2015-04-17	2868.87	5	-0.910834
2015-04-20	2822.19	1	-1.6405
2015-04-21	2820.24	2	-0.0691192
2015-04-22	2826.91	3	0.236225
2015-04-23	2844.97	4	0.636828
2015-04-24	2922.78	5	2.69827
2015-04-27	2960.14	1	1.27013
2015-04-28	2965.26	2	0.172815
2015-04-29	2990.04	3	0.832205
2015-04-30	2987.14	4	-0.0970357
2015-05-01	2929.38	5	-1.95256
2015-05-04	2938.39	1	0.307102
2015-05-05	2982.72	2	1.49738
2015-05-06	2968.14	3	-0.490014
2015-05-07	2979.42	4	0.379316
2015-05-08	2996.94	5	0.586312
2015-05-11	3048.79	1	1.7153
2015-05-12	3090.46	2	1.35752
2015-05-13	3110.31	3	0.640245
2015-05-14	3134.06	4	0.760689
2015-05-15	3172.39	5	1.2156
2015-05-18	3177.88	1	0.172906
2015-05-19	3178.35	2	0.0147886
2015-05-20	3158.02	3	-0.641695
2015-05-21	3206.26	4	1.51599
2015-05-22	3185.32	5	-0.655239
2015-05-25	3185.32	1	0
2015-05-26	3183.7	2	-0.0508712
2015-05-27	3173.68	3	-0.315224
2015-05-28	3165.56	4	-0.256182
2015-05-29	3140.19	5	-0.804667
2015-06-01	3107.38	1	-1.05034
2015-06-02	3163.41	2	1.78706
2015-06-03	3178.53	3	0.476827
2015-06-04	3160.61	4	-0.565378
2015-06-05	3156.78	5	-0.121253
2015-06-08	3159.49	1	0.0858101
2015-06-09	3158.26	2	-0.0389379
2015-06-10	3179.68	3	0.675932
2015-06-11	3158.64	4	-0.663901
2015-06-12	3202.84	5	1.38964
2015-06-15	3233.05	1	0.938805
2015-06-16	3265.78	2	1.00727
2015-06-17	3257.5	3	-0.25386
2015-06-18	3323.03	4	1.9917
2015-06-19	3298.68	5	-0.735463
2015-06-22	3319.14	1	0.618332
2015-06-23	3285.68	2	-1.01321
2015-06-24	3314	3	0.858229
2015-06-25	3305.18	4	-0.266498
2015-06-26	3352.21	5	1.41289
2015-06-29	3362.95	1	0.319874
2015-06-30	3315.65	2	-1.41649
2015-07-01	3316.07	3	0.0126664
2015-07-02	3330.82	4	0.443817
2015-07-03	3330.82	5	0
2015-07-06	3320.36	1	-0.314531
2015-07-07	3291.69	2	-0.86721
2015-07-08	3285.75	3	-0.180617
2015-07-09	3315.92	4	0.914018
2015-07-10	3347.08	5	0.935321
2015-07-13	3347.08	1	0
2015-07-14	3408.55	2	1.81987
2015-07-15	3397.79	3	-0.316176
2015-07-16	3395.18	4	-0.0768442
2015-07-17	3393.44	5	-0.0512623
2015-07-20	3397.62	1	0.123103
2015-07-21	3385.89	2	-0.345839
2015-07-22	3331.12	3	-1.63082
2015-07-23	3295.86	4	-1.06414
2015-07-24	3240.57	5	-1.69179
2015-07-27	3253.88	1	0.409889
2015-07-28	3268.06	2	0.434841
2015-07-29	3281.46	3	0.409191
2015-07-30	3286.49	4	0.153168
2015-07-31	3276.29	5	-0.310844
2015-08-03	3236.69	1	-1.21605
2015-08-04	3231.33	2	-0.165739
2015-08-05	3181.59	3	-1.55127
2015-08-06	3118.87	4	-1.99103
2015-08-07	3171.83	5	1.6838
2015-08-10	3160.37	1	-0.36196
2015-08-11	3147.91	2	-0.395037
2015-08-12	3098.63	3	-1.57787
2015-08-13	3116.78	4	0.584034
2015-08-14	3114	5	-0.0892344
2015-08-17	3112.06	1	-0.0623187
2015-08-18	3134.35	2	0.713693
2015-08-19	3162.85	3	0.90517
2015-08-20	3181.64	4	0.592327
2015-08-21	3133.33	5	-1.53005
2015-08-24	3149.78	1	0.523627
2015-08-25	3154.66	2	0.154812
2015-08-26	3147	3	-0.243111
2015-08-27	3153.2	4	0.196819
2015-08-28	3145.6	5	-0.241316
2015-08-31	3161.57	1	0.506409
2015-09-01	3184.34	2	0.717631
2015-09-02	3148.97	3	-1.11696
2015-09-03	3155.81	4	0.216978
2015-09-04	3205.83	5	1.57258
2015-09-07	3239.8	1	1.05406
2015-09-08	3262.98	2	0.712929
2015-09-09	3307.55	3	1.35668
2015-09-10	3313.59	4	0.182446
2015-09-11	3297.89	5	-0.474932
2015-09-14	3325.18	1	0.824094
2015-09-15	3270.52	2	-1.65748
2015-09-16	3303.69	3	1.0091
2015-09-17	3324.52	4	0.628528
2015-09-18	3356.35	5	0.952877
2015-09-21	3350.48	1	-0.175045
2015-09-22	3349.49	2	-0.0295524
2015-09-23	3354.38	3	0.145886
2015-09-24	3339.51	4	-0.444286
2015-09-25	3320.83	5	-0.560934
2015-09-28	3287.64	1	-1.00448
2015-09-29	3230.37	2	-1.75733
2015-09-30	3196.29	3	-1.06059
2015-10-01	3160.24	4	-1.13428
2015-10-02	3153.9	5	-0.200819
2015-10-05	3150.37	1	-0.111988
2015-10-06	3146.48	2	-0.123554
2015-10-07	3140.67	3	-0.184821
2015-10-08	3128.52	4	-0.38761
2015-10-09	3117.33	5	-0.358318
2015-10-12	3143.86	1	0.847448
2015-10-13	3179.15	2	1.11625
2015-10-14	3173.43	3	-0.180084
2015-10-15	3169.62	4	-0.120131
2015-10-16	3185.04	5	0.485314
2015-10-19	3236.09	1	1.5901
2015-10-20	3263.64	2	0.847733
2015-10-21	3212.02	3	-1.59431
2015-10-22	3206.11	4	-0.184166
2015-10-23	3199.82	5	-0.196381
2015-10-26	3248.38	1	1.50619
2015-10-27	3262.28	2	0.426993
2015-10-28	3281.71	3	0.593829
2015-10-29	3280.99	4	-0.0219422
2015-10-30	3322.99	5	1.27198
2015-11-02	3346.62	1	0.70859
2015-11-03	3347.39	2	0.0230056
2015-11-04	3286.03	3	-1.85008
2015-11-05	3318.56	4	0.98508
2015-11-06	3289.36	5	-0.883794
2015-11-09	3257.49	1	-0.973606
2015-11-10	3323.31	2	2.00043
2015-11-11	3359.98	3	1.09737
2015-11-12	3373.22	4	0.393276
2015-11-13	3415.97	5	1.25937
2015-11-16	3420.17	1	0.122876
2015-11-17	3413.84	2	-0.18525
2015-11-18	3393.38	3	-0.601128
2015-11-19	3430.19	4	1.07892
2015-11-20	3414.63	5	-0.454651
2015-11-23	3354.8	1	-1.7677
2015-11-24	3384.84	2	0.891448
2015-11-25	3354.34	3	-0.905161
2015-11-26	3357.98	4	0.108457
2015-11-27	3357.86	5	-0.00357364
2015-11-30	3377.69	1	0.588818
2015-12-01	3380.98	2	0.0973564
2015-12-02	3374.88	3	-0.180584
2015-12-03	3423.48	4	1.42978
2015-12-04	3431.81	5	0.243024
2015-12-07	3449.18	1	0.50487
2015-12-08	3364.88	2	-2.47442
2015-12-09	3419.34	3	1.60552
2015-12-10	3396.71	4	-0.664023
2015-12-11	3402.86	5	0.180894
2015-12-14	3419.98	1	0.501845
2015-12-15	3389.4	2	-0.898179
2015-12-16	3338.7	3	-1.50714
2015-12-17	3304.74	4	-1.02237
2015-12-18	3305.12	5	0.011498
2015-12-21	3290.51	1	-0.443021
2015-12-22	3245.65	2	-1.37269
2015-12-23	3300.6	3	1.67886
2015-12-24	3294.03	4	-0.199253
2015-12-25	3294.03	5	0
2015-12-28	3270.59	1	-0.714134
2015-12-29	3258.71	2	-0.363899
2015-12-30	3273.51	3	0.453139
2015-12-31	3268.66	4	-0.148269
2016-01-01	3268.66	5	0
2016-01-04	3182.26	1	-2.67885
2016-01-05	3115.17	2	-2.13079
2016-01-06	3035.31	3	-2.59702
2016-01-07	3021.27	4	-0.463629
2016-01-08	3069.2	5	1.57397
2016-01-11	2953.28	1	-3.85005
2016-01-12	2924.45	2	-0.980999
2016-01-13	2948.53	3	0.820031
2016-01-14	2914.5	4	-1.16085
2016-01-15	2969.12	5	1.85673
2016-01-18	2971.91	1	0.0939231
2016-01-19	2984.54	2	0.424079
2016-01-20	2857.29	3	-4.3572
2016-01-21	2914.22	4	1.97286
2016-01-22	2933.38	5	0.655314
2016-01-25	2878.79	1	-1.87853
2016-01-26	2886.57	2	0.269888
2016-01-27	2821.46	3	-2.28145
2016-01-28	2850.78	4	1.03382
2016-01-29	2816.37	5	-1.21438
2016-02-01	2924.48	1	3.76679
2016-02-02	2823.02	2	-3.53095
2016-02-03	2894.94	3	2.51572
2016-02-04	2829.7	4	-2.27937
2016-02-05	2845.59	5	0.559973
2016-02-08	2922.43	1	2.6645
2016-02-09	2912.16	2	-0.352039
2016-02-10	2905.25	3	-0.237563
2016-02-11	2858.67	4	-1.6163
2016-02-12	2919.21	5	2.09566
2016-02-15	2901.45	1	-0.610242
2016-02-16	2892.16	2	-0.320698
2016-02-17	2931.11	3	1.33776
2016-02-18	2968.57	4	1.26992
2016-02-19	2908.08	5	-2.05873
2016-02-22	2937.36	1	1.00181
2016-02-23	2942.62	2	0.178912
2016-02-24	2982.3	3	1.33945
2016-02-25	2998.47	4	0.540734
2016-02-26	2939.99	5	-1.9696
2016-02-29	3006.12	1	2.2244
2016-03-01	2986.65	2	-0.649785
2016-03-02	3003.01	3	0.546276
2016-03-03	3010.75	4	0.25741
2016-03-04	3055.51	5	1.47573
2016-03-07	3063.73	1	0.268661
2016-03-08	3028.04	2	-1.17176
2016-03-09	3078.49	3	1.65237
2016-03-10	3118.55	4	1.29289
2016-03-11	3120.08	5	0.0490492
2016-03-14	3141.83	1	0.694679
2016-03-15	3110.8	2	-0.99255
2016-03-16	3099.83	3	-0.353266
2016-03-17	3181.54	4	2.60181
2016-03-18	3178.27	5	-0.102833
2016-03-21	3129.7	1	-1.53999
2016-03-22	3093.64	2	-1.15888
2016-03-23	3028.4	3	-2.1314
2016-03-24	3035.18	4	0.22363
2016-03-25	3035.18	5	0
2016-03-28	3041.6	1	0.211296
2016-03-29	3042.64	2	0.0341867
2016-03-30	3045.82	3	0.10446
2016-03-31	3023.34	4	-0.740798
2016-04-01	2960.16	5	-2.11189
2016-04-04	2939.05	1	-0.715692
2016-04-05	2954.54	2	0.525657
2016-04-06	2973.6	3	0.643037
2016-04-07	2926.97	4	-1.58056
2016-04-08	2947.52	5	0.699638
2016-04-11	2991.48	1	1.48041
2016-04-12	3013.78	2	0.742686
2016-04-13	3007.89	3	-0.195627
2016-04-14	3042.02	4	1.12829
2016-04-15	3022.51	5	-0.643416
2016-04-18	3077.06	1	1.7887
2016-04-19	3121.04	2	1.41917
2016-04-20	3128.26	3	0.231066
2016-04-21	3139.25	4	0.350698
2016-04-22	3196.14	5	1.79599
2016-04-25	3212.07	1	0.497176
2016-04-26	3254.83	2	1.32245
2016-04-27	3235.72	3	-0.588858
2016-04-28	3223.38	4	-0.382097
2016-04-29	3281.13	5	1.77574
2016-05-02	3280.01	1	-0.0341404
2016-05-03	3253.39	2	-0.814894
2016-05-04	3238.39	3	-0.462124
2016-05-05	3217.39	4	-0.650582
2016-05-06	3137.26	5	-2.52207
2016-05-09	3147.52	1	0.326503
2016-05-10	3168.18	2	0.654245
2016-05-11	3141.18	3	-0.855877
2016-05-12	3084	4	-1.83711
2016-05-13	3040.45	5	-1.42219
2016-05-16	3001.09	1	-1.303
2016-05-17	2977.96	2	-0.773705
2016-05-18	3016.83	3	1.29681
2016-05-19	2980.97	4	-1.19579
2016-05-20	3005.25	5	0.811201
2016-05-23	3056.73	1	1.6985
2016-05-24	3061.05	2	0.141228
2016-05-25	3035.77	3	-0.82929
2016-05-26	3034	4	-0.0583218
2016-05-27	3077.58	5	1.42617
2016-05-30	3077.58	1	0
2016-05-31	3116.83	2	1.26729
2016-06-01	3097.17	3	-0.632767
2016-06-02	3120.49	4	0.750125
2016-06-03	3115.69	5	-0.15394
2016-06-06	3139.27	1	0.753965
2016-06-07	3165.09	2	0.81912
2016-06-08	3168.92	3	0.120934
2016-06-09	3165.82	4	-0.097873
2016-06-10	3168.02	5	0.0694681
2016-06-13	3176.66	1	0.272354
2016-06-14	3166.51	2	-0.32003
2016-06-15	3142.96	3	-0.7465
2016-06-16	3064.84	4	-2.51697
2016-06-17	3108.4	5	1.41128
2016-06-20	3167.47	1	1.8825
2016-06-21	3179.91	2	0.391973
2016-06-22	3192.83	3	0.405478
2016-06-23	3218.07	4	0.787413
2016-06-24	3044.66	5	-5.53926
2016-06-27	3009.96	1	-1.14624
2016-06-28	3025.54	2	0.51628
2016-06-29	3058.2	3	1.07369
2016-06-30	2998.89	4	-1.95843
2016-07-01	3023.37	5	0.812988
2016-07-04	3053.46	1	0.990327
2016-07-05	3078.69	2	0.822881
2016-07-06	3101.59	3	0.74107
2016-07-07	3122.06	4	0.657816
2016-07-08	3114.41	5	-0.245331
2016-07-11	3120.27	1	0.187981
2016-07-12	3142.05	2	0.695592
2016-07-13	3163.88	3	0.692367
2016-07-14	3185.6	4	0.684153
2016-07-15	3105.28	5	-2.55368
2016-07-18	3138.04	1	1.04945
2016-07-19	3056	2	-2.64915
2016-07-20	3037.3	3	-0.613791
2016-07-21	2989.03	4	-1.602
2016-07-22	2968.17	5	-0.700332
2016-07-25	2934.1	1	-1.15448
2016-07-26	2931.42	2	-0.0913815
2016-07-27	2937.89	3	0.220469
2016-07-28	2933.98	4	-0.133177
2016-07-29	2912.89	5	-0.721415
2016-08-01	2984.58	1	2.43133
2016-08-02	2958.07	2	-0.8922
2016-08-03	3039.22	3	2.70639
2016-08-04	3029.4	4	-0.323632
2016-08-05	3047.68	5	0.601607
2016-08-08	3037.73	1	-0.327012
2016-08-09	3006.65	2	-1.0284
2016-08-10	3054.34	3	1.5737
2016-08-11	3037.06	4	-0.567359
2016-08-12	3029.46	5	-0.250556
2016-08-15	3032.47	1	0.0993083
2016-08-16	3078.79	2	1.51592
2016-08-17	3094.28	3	0.501858
2016-08-18	3139.41	4	1.44796
2016-08-19	3114.93	5	-0.78282
2016-08-22	3020.3	1	-3.08505
2016-08-23	3054.01	2	1.10993
2016-08-24	3053.76	3	-0.00818629
2016-08-25	3055.81	4	0.0671078
2016-08-26	3041.12	5	-0.481883
2016-08-29	2968.06	1	-2.43173
2016-08-30	2929.21	2	-1.31758
2016-08-31	2940.74	3	0.392849
2016-09-01	2928.58	4	-0.414359
2016-09-02	2938.54	5	0.33952
2016-09-05	2945.74	1	0.24472
2016-09-06	2959.62	2	0.470082
2016-09-07	2941	3	-0.631122
2016-09-08	2919.69	4	-0.727221
2016-09-09	2807.16	5	-3.93042
2016-09-12	2841.16	1	1.20391
2016-09-13	2830.5	2	-0.375904
2016-09-14	2856.74	3	0.922774
2016-09-15	2878.55	4	0.760558
2016-09-16	2848.2	5	-1.05995
2016-09-19	2898.73	1	1.75855
2016-09-20	2890.52	2	-0.283629
2016-09-21	2898.77	3	0.285009
2016-09-22	2944.81	4	1.57578
2016-09-23	2875.97	5	-2.36543
2016-09-26	2868.78	1	-0.250316
2016-09-27	2890.01	2	0.737311
2016-09-28	2851.96	3	-1.32535
2016-09-29	2773.22	4	-2.79974
2016-09-30	2797.87	5	0.884931
2016-10-03	2808.41	1	0.376007
2016-10-04	2815.89	2	0.265989
2016-10-05	2834.99	3	0.676003
2016-10-06	2792.15	4	-1.52265
2016-10-07	2775.59	5	-0.594857
2016-10-10	2678.57	1	-3.55803
2016-10-11	2677.06	2	-0.0563893
2016-10-12	2651.01	3	-0.977848
2016-10-13	2685	4	1.274
2016-10-14	2695.09	5	0.375087
2016-10-17	2669.95	1	-0.937185
2016-10-18	2672.17	2	0.0831131
2016-10-19	2686.86	3	0.548235
2016-10-20	2680.12	4	-0.251166
2016-10-21	2680.21	5	0.003358
2016-10-24	2670.53	1	-0.36182
2016-10-25	2687.53	2	0.63456
2016-10-26	2708.29	3	0.769488
2016-10-27	2681.5	4	-0.99411
2016-10-28	2695.23	5	0.51072
2016-10-31	2692.19	1	-0.112856
2016-11-01	2665.42	2	-0.999335
2016-11-02	2678.19	3	0.477955
2016-11-03	2673.48	4	-0.17602
2016-11-04	2589.08	5	-3.20784
2016-11-07	2498.65	1	-3.5552
2016-11-08	2510.2	2	0.461185
2016-11-09	2501.46	3	-0.348787
2016-11-10	2498.2	4	-0.130409
2016-11-11	2520.98	5	0.907724
2016-11-14	2460.76	1	-2.41775
2016-11-15	2441.37	2	-0.791089
2016-11-16	2458.56	3	0.701646
2016-11-17	2459.05	4	0.0199284
2016-11-18	2455.82	5	-0.131438
2016-11-21	2463.28	1	0.303308
2016-11-22	2473.05	2	0.395841
2016-11-23	2469.79	3	-0.131908
2016-11-24	2469.79	4	0
2016-11-25	2447.18	5	-0.919679
2016-11-28	2430	1	-0.704508
2016-11-29	2441.28	2	0.463123
2016-11-30	2415.66	3	-1.055
2016-12-01	2434.89	4	0.792904
2016-12-02	2426.34	5	-0.351763
2016-12-05	2398.8	1	-1.14153
2016-12-06	2377.05	2	-0.910839
2016-12-07	2344.77	3	-1.36729
2016-12-08	2290.56	4	-2.3391
2016-12-09	2206.02	5	-3.76063
2016-12-12	2261.32	1	2.47587
2016-12-13	2306.6	2	1.98259
2016-12-14	2333.66	3	1.16633
2016-12-15	2261.36	4	-3.14714
2016-12-16	2278.81	5	0.768697
2016-12-19	2311.22	1	1.41221
2016-12-20	2278.65	2	-1.41924
2016-12-21	2288	3	0.409491
2016-12-22	2213.49	4	-3.31076
2016-12-23	2251.21	5	1.68974
2016-12-26	2251.21	1	0
2016-12-27	2244.11	2	-0.315884
2016-12-28	2214.27	3	-1.33862
2016-12-29	2174.5	4	-1.8124
2016-12-30	2148.21	5	-1.21638
2017-01-02	2148.21	1	0
2017-01-03	2177.18	2	1.33955
2017-01-04	2238.1	3	2.75968
2017-01-05	2245.08	4	0.311386
2017-01-06	2258.91	5	0.614124
2017-01-09	2184.75	1	-3.3381
2017-01-10	2206.34	2	0.983363
2017-01-11	2138.09	3	-3.14221
2017-01-12	2224.57	4	3.96507
2017-01-13	2211.53	5	-0.587905
2017-01-16	2211.53	1	0
2017-01-17	2241.3	2	1.33715
2017-01-18	2235.07	3	-0.278351
2017-01-19	2181.78	4	-2.41315
2017-01-20	2166.75	5	-0.691271
2017-01-23	2195.2	1	1.30448
2017-01-24	2222.89	2	1.2535
2017-01-25	2222.74	3	-0.0067482
2017-01-26	2169.73	4	-2.41379
2017-01-27	2132.27	5	-1.74156
2017-01-30	2112.17	1	-0.947128
2017-01-31	2129.19	2	0.802577
2017-02-01	2141.69	3	0.585361
2017-02-02	2121.72	4	-0.936816
2017-02-03	2109.03	5	-0.599895
2017-02-06	2083.5	1	-1.2179
2017-02-07	2045.98	2	-1.81723
2017-02-08	2035.12	3	-0.532211
2017-02-09	2023.73	4	-0.561244
2017-02-10	1991.1	5	-1.62551
2017-02-13	1948	1	-2.1884
2017-02-14	1935.87	2	-0.624637
2017-02-15	2020.67	3	4.28723
2017-02-16	2074.01	4	2.60548
2017-02-17	2039.06	5	-1.6995
2017-02-20	2031.55	1	-0.368987
2017-02-21	2031.62	2	0.00344559
2017-02-22	2025.22	3	-0.315517
2017-02-23	2059.45	4	1.67606
2017-02-24	2023.13	5	-1.77931
2017-02-27	2006.19	1	-0.840842
2017-02-28	1934.99	2	-3.61352
2017-03-01	1928.4	3	-0.341151
2017-03-02	1953.71	4	1.30395
2017-03-03	1980.06	5	1.3397
2017-03-06	1958.94	1	-1.07236
2017-03-07	1943.56	2	-0.788217
2017-03-08	1937.53	3	-0.310738
2017-03-09	1925.49	4	-0.623349
2017-03-10	1952.12	5	1.37355
2017-03-13	2034.78	1	4.14717
2017-03-14	2071.86	2	1.8059
2017-03-15	2066.98	3	-0.235815
2017-03-16	2051.35	4	-0.759049
2017-03-17	2040.5	5	-0.530324
2017-03-20	2134.51	1	4.50422
2017-03-21	2172.88	2	1.78164
2017-03-22	2183.74	3	0.498553
2017-03-23	2195.7	4	0.54619
2017-03-24	2152.74	5	-1.97595
2017-03-27	2170.99	1	0.844184
2017-03-28	2147.38	2	-1.09348
2017-03-29	2105.21	3	-1.98333
2017-03-30	2113.31	4	0.384021
2017-03-31	2107.67	5	-0.267237
2017-04-03	2117.98	1	0.487973
2017-04-04	2119.16	2	0.0556979
2017-04-05	2123.12	3	0.186692
2017-04-06	2096.16	4	-1.27796
2017-04-07	2020.25	5	-3.68858
2017-04-10	1974.11	1	-2.31036
2017-04-11	1998.02	2	1.2039
2017-04-12	1973.33	3	-1.24342
2017-04-13	1925.06	4	-2.47653
2017-04-14	1925.06	5	0
2017-04-17	1942.31	1	0.892085
2017-04-18	1954.29	2	0.614897
2017-04-19	1901.08	3	-2.76048
2017-04-20	1832.82	4	-3.65664
2017-04-21	1879.8	5	2.53096
2017-04-24	1844.37	1	-1.90276
2017-04-25	1881.41	2	1.98837
2017-04-26	1907.24	3	1.36357
2017-04-27	1902.08	4	-0.270915
2017-04-28	1869.4	5	-1.73305
2017-05-01	1855.35	1	-0.754417
2017-05-02	1844.62	2	-0.580006
2017-05-03	1817.36	3	-1.48884
2017-05-04	1874.72	4	3.10744
2017-05-05	1903.56	5	1.52665
2017-05-08	1987.3	1	4.30511
2017-05-09	1991.96	2	0.234215
2017-05-10	1987.74	3	-0.212076
2017-05-11	1984.63	4	-0.156582
2017-05-12	2033.66	5	2.44046
2017-05-15	2070.43	1	1.79192
2017-05-16	2058.87	2	-0.559903
2017-05-17	2075.9	3	0.823751
2017-05-18	2108.35	4	1.55109
2017-05-19	2054.47	5	-2.58877
2017-05-22	2058.27	1	0.184792
2017-05-23	2039.54	2	-0.914153
2017-05-24	1924.33	3	-5.81464
2017-05-25	1908.49	4	-0.82655
2017-05-26	1936.25	5	1.44408
2017-05-29	1936.25	1	0
2017-05-30	2055.13	2	5.9586
2017-05-31	2065.74	3	0.514941
2017-06-01	2049.93	4	-0.768287
2017-06-02	2027.1	5	-1.11994
2017-06-05	2016.53	1	-0.522799
2017-06-06	2010.81	2	-0.284059
2017-06-07	2000.43	3	-0.517547
2017-06-08	2005.66	4	0.261103
2017-06-09	2056.05	5	2.48135
2017-06-12	2098.53	1	2.04504
2017-06-13	2065.09	2	-1.60633
2017-06-14	2088.59	3	1.13154
2017-06-15	2108.19	4	0.934056
2017-06-16	2075.04	5	-1.58493
2017-06-19	1988.87	1	-4.24138
2017-06-20	1971.89	2	-0.857416
2017-06-21	1908.7	3	-3.25701
2017-06-22	1884.92	4	-1.2537
2017-06-23	1936.34	5	2.69142
2017-06-26	1901.01	1	-1.84143
2017-06-27	1918.98	2	0.940847
2017-06-28	1940.38	3	1.109
2017-06-29	1920.27	4	-1.0418
2017-06-30	1988.14	5	3.47337
2017-07-03	2010.84	1	1.1353
2017-07-04	1997.75	2	-0.6531
2017-07-05	1999.23	3	0.0740559
2017-07-06	1978.63	4	-1.03574
2017-07-07	1931.04	5	-2.4346
2017-07-10	1897.95	1	-1.72844
2017-07-11	1876.47	2	-1.1382
2017-07-12	1883.45	3	0.371285
2017-07-13	1938.43	4	2.87732
2017-07-14	1977.8	5	2.01067
2017-07-17	1975.04	1	-0.139646
2017-07-18	1976.28	2	0.0627638
2017-07-19	2004.46	3	1.41584
2017-07-20	2015.82	4	0.565136
2017-07-21	2027.88	5	0.596485
2017-07-24	2029.47	1	0.0783763
2017-07-25	1990.69	2	-1.92934
2017-07-26	1975.88	3	-0.746744
2017-07-27	2056.65	4	4.00646
2017-07-28	2105.6	5	2.3522
2017-07-31	2110.81	1	0.24713
2017-08-01	2069.22	2	-1.99
2017-08-02	2106.51	3	1.78608
2017-08-03	2106.14	4	-0.0175661
2017-08-04	2048.81	5	-2.75978
2017-08-07	2066.87	1	0.877625
2017-08-08	2056.85	2	-0.48597
2017-08-09	2034.07	3	-1.1137
2017-08-10	1999.16	4	-1.73116
2017-08-11	2009.34	5	0.507922
2017-08-14	1957.46	1	-2.61586
2017-08-15	1914.25	2	-2.23218
2017-08-16	1889.47	3	-1.30295
2017-08-17	1917.12	4	1.45277
2017-08-18	1926.57	5	0.491716
2017-08-21	1941.25	1	0.759088
2017-08-22	1923.78	2	-0.904009
2017-08-23	1912.22	3	-0.602713
2017-08-24	1932.26	4	1.04254
2017-08-25	1969.4	5	1.90386
2017-08-28	2014.59	1	2.26868
2017-08-29	2002.35	2	-0.609421
2017-08-30	1970.16	3	-1.62067
2017-08-31	1968.96	4	-0.0609273
2017-09-01	1992.3	5	1.17843
2017-09-04	1986.12	1	-0.310676
2017-09-05	1987.67	2	0.0780112
2017-09-06	1958.98	3	-1.45392
2017-09-07	1944.22	4	-0.756306
2017-09-08	1966.5	5	1.13944
2017-09-11	1962.8	1	-0.188329
2017-09-12	1979.23	2	0.833585
2017-09-13	2008.88	3	1.48695
2017-09-14	2000.97	4	-0.394529
2017-09-15	2030.19	5	1.44973
2017-09-18	2005.38	1	-1.22958
2017-09-19	1999.54	2	-0.291641
2017-09-20	2024.4	3	1.23562
2017-09-21	2042.83	4	0.906274
2017-09-22	2006.34	5	-1.80239
2017-09-25	1996.55	1	-0.489148
2017-09-26	1991.87	2	-0.23468
2017-09-27	2028.65	3	1.82967
2017-09-28	2000.41	4	-1.40184
2017-09-29	2050.42	5	2.46925
2017-10-02	2050.77	1	0.0170682
2017-10-03	2084.55	2	1.63377
2017-10-04	2087.49	3	0.140938
2017-10-05	2097.04	4	0.456444
2017-10-06	2100.93	5	0.185328
2017-10-09	2039.13	1	-2.98569
2017-10-10	2068.91	2	1.44987
2017-10-11	2124.12	3	2.63357
2017-10-12	2111.05	4	-0.617214
2017-10-13	2108.43	5	-0.124186
2017-10-16	2070.88	1	-1.797
2017-10-17	2083.07	2	0.586913
2017-10-18	2085.42	3	0.112751
2017-10-19	2140.83	4	2.62233
2017-10-20	2134.16	5	-0.312048
2017-10-23	2125.85	1	-0.39014
2017-10-24	2091.28	2	-1.63954
2017-10-25	2089.82	3	-0.0698381
2017-10-26	2122.62	4	1.55732
2017-10-27	2108.5	5	-0.667438
2017-10-30	2114.85	1	0.300709
2017-10-31	2095.5	2	-0.91917
2017-11-01	2122.32	3	1.27176
2017-11-02	2061.38	4	-2.91342
2017-11-03	2064.12	5	0.132832
2017-11-06	2115.9	1	2.47763
2017-11-07	2145.17	2	1.37385
2017-11-08	2183.33	3	1.76324
2017-11-09	2182.37	4	-0.0439792
2017-11-10	2212.71	5	1.38066
2017-11-13	2194.24	1	-0.838226
2017-11-14	2157.21	2	-1.702
2017-11-15	2151.05	3	-0.285963
2017-11-16	2159.12	4	0.374464
2017-11-17	2148.63	5	-0.48703
2017-11-20	2111.08	1	-1.76308
2017-11-21	2124.31	2	0.624738
2017-11-22	2138.13	3	0.648457
2017-11-23	2127.49	4	-0.498873
2017-11-24	2119.73	5	-0.365416
2017-11-27	2080.72	1	-1.85747
2017-11-28	2052.5	2	-1.36554
2017-11-29	2105.65	3	2.55656
2017-11-30	2056.66	4	-2.35409
2017-12-01	2046	5	-0.519664
2017-12-04	2006.23	1	-1.96293
2017-12-05	1946.47	2	-3.02399
2017-12-06	1915.93	3	-1.58143
2017-12-07	1892.23	4	-1.24471
2017-12-08	1910.75	5	0.973981
2017-12-11	1931.35	1	1.07234
2017-12-12	1891.7	2	-2.07433
2017-12-13	1911.95	3	1.06478
2017-12-14	1905.78	4	-0.323229
2017-12-15	1898.1	5	-0.403799
2017-12-18	1934.38	1	1.89335
2017-12-19	1913.93	2	-1.06281
2017-12-20	1932.78	3	0.980066
2017-12-21	1916.34	4	-0.854226
2017-12-22	1855.7	5	-3.21551
2017-12-25	1855.7	1	0
2017-12-26	1867.18	2	0.616729
2017-12-27	1871.25	3	0.217739
2017-12-28	1906.56	4	1.86939
2017-12-29	1899.06	5	-0.394154
2018-01-01	1899.06	1	0
2018-01-02	1930.98	2	1.66686
2018-01-03	1896.36	3	-1.80914
2018-01-04	1897.96	4	0.0843366
2018-01-05	1895.86	5	-0.110706
2018-01-08	1908.56	1	0.667647
2018-01-09	1906.69	2	-0.0980277
2018-01-10	1944.57	3	1.96721
2018-01-11	1933.58	4	-0.566767
2018-01-12	1929.37	5	-0.217968
2018-01-15	1957.84	1	1.46483
2018-01-16	1951.66	2	-0.316153
2018-01-17	2002.1	3	2.55163
2018-01-18	1997.18	4	-0.246044
2018-01-19	1951.37	5	-2.32045
2018-01-22	1960.28	1	0.455563
2018-01-23	1949.88	2	-0.531949
2018-01-24	1976.02	3	1.33169
2018-01-25	1973.94	4	-0.105318
2018-01-26	2005.28	5	1.57522
2018-01-29	1963.85	1	-2.08769
2018-01-30	1993.24	2	1.48546
2018-01-31	2013.7	3	1.02124
2018-02-01	2038.76	4	1.2368
2018-02-02	2081.85	5	2.09151
2018-02-05	2068.59	1	-0.638971
2018-02-06	2067.39	2	-0.0580274
2018-02-07	2042.9	3	-1.19166
2018-02-08	2063.5	4	1.00332
2018-02-09	2063.97	5	0.0227742
2018-02-12	2012.11	1	-2.54474
2018-02-13	2043.18	2	1.53235
2018-02-14	2096.42	3	2.57237
2018-02-15	2149.08	4	2.48087
2018-02-16	2152.74	5	0.170161
2018-02-19	2151.94	1	-0.0371688
2018-02-20	2164.73	2	0.592588
2018-02-21	2187.94	3	1.06648
2018-02-22	2170.87	4	-0.783245
2018-02-23	2209.04	5	1.743
2018-02-26	2225.37	1	0.736516
2018-02-27	2235.88	2	0.471169
2018-02-28	2229.72	3	-0.275887
2018-03-01	2265.31	4	1.58356
2018-03-02	2320.7	5	2.41572
2018-03-05	2429.98	1	4.60142
2018-03-06	2440.65	2	0.438137
2018-03-07	2441.34	3	0.0282672
2018-03-08	2489.36	4	1.94786
2018-03-09	2460.53	5	-1.16489
2018-03-12	2535.37	1	2.99628
2018-03-13	2531.1	2	-0.168559
2018-03-14	2546.98	3	0.625435
2018-03-15	2538.22	4	-0.34453
2018-03-16	2538.05	5	-0.00669783
2018-03-19	2466.72	1	-2.85067
2018-03-20	2501.57	2	1.40292
2018-03-21	2542.99	3	1.6422
2018-03-22	2555.31	4	0.483299
2018-03-23	2634.29	5	3.04401
2018-03-26	2641.33	1	0.266888
2018-03-27	2566.84	2	-2.8607
2018-03-28	2595.92	3	1.12654
2018-03-29	2540.41	4	-2.16155
2018-03-30	2540.41	5	0
2018-04-02	2540.41	1	0
2018-04-03	2508.78	2	-1.25289
2018-04-04	2503.87	3	-0.195904
2018-04-05	2503.56	4	-0.0123816
2018-04-06	2462.02	5	-1.67316
2018-04-09	2516.64	1	2.19425
2018-04-10	2503.06	2	-0.54107
2018-04-11	2555.02	3	2.05461
2018-04-12	2538.9	4	-0.632914
2018-04-13	2549.32	5	0.409574
2018-04-16	2682.65	1	5.09785
2018-04-17	2674.61	2	-0.300154
2018-04-18	2753.51	3	2.90729
2018-04-19	2751.73	4	-0.0646657
2018-04-20	2673.94	5	-2.86768
2018-04-23	2669.03	1	-0.183793
2018-04-24	2735.19	2	2.44858
2018-04-25	2745.07	3	0.360567
2018-04-26	2730.92	4	-0.516803
2018-04-27	2741.37	5	0.381925
2018-04-30	2746.23	1	0.177127
2018-05-01	2799.5	2	1.92118
2018-05-02	2752.98	3	-1.67569
2018-05-03	2767.13	4	0.512672
2018-05-04	2734	5	-1.20449
2018-05-07	2775.24	1	1.49715
2018-05-08	2731.04	2	-1.60547
2018-05-09	2727.93	3	-0.113941
2018-05-10	2719.47	4	-0.310607
2018-05-11	2757.91	5	1.40361
2018-05-14	2735.52	1	-0.81516
2018-05-15	2637.87	2	-3.63498
2018-05-16	2682.58	3	1.68072
2018-05-17	2608.62	4	-2.79577
2018-05-18	2638.7	5	1.1465
2018-05-21	2602	1	-1.4006
2018-05-22	2587.46	2	-0.560368
2018-05-23	2608.5	3	0.809864
2018-05-24	2593.81	4	-0.564751
2018-05-25	2558.55	5	-1.36871
2018-05-28	2558.55	1	0
2018-05-29	2505.87	2	-2.08047
2018-05-30	2530.27	3	0.969004
2018-05-31	2463.66	4	-2.6678
2018-06-01	2463.02	5	-0.025981
2018-06-04	2366.64	1	-3.9917
2018-06-05	2316	2	-2.16297
2018-06-06	2319.97	3	0.171269
2018-06-07	2291.37	4	-1.24044
2018-06-08	2379.6	5	3.77825
2018-06-11	2366.67	1	-0.54485
2018-06-12	2390.29	2	0.993079
2018-06-13	2340.9	3	-2.08792
2018-06-14	2387.75	4	1.9816
2018-06-15	2474.5	5	3.56869
2018-06-18	2432.84	1	-1.69791
2018-06-19	2421.33	2	-0.474232
2018-06-20	2512.88	3	3.71125
2018-06-21	2483.06	4	-1.19378
2018-06-22	2480.28	5	-0.112021
2018-06-25	2469.44	1	-0.438005
2018-06-26	2454.64	2	-0.601129
2018-06-27	2369.74	3	-3.51999
2018-06-28	2428.27	4	2.43988
2018-06-29	2476.76	5	1.97722
2018-07-02	2468.24	1	-0.344591
2018-07-03	2427.61	2	-1.65981
2018-07-04	2438.43	3	0.444716
2018-07-05	2451.11	4	0.518659
2018-07-06	2435.77	5	-0.627805
2018-07-09	2421.59	1	-0.583858
2018-07-10	2468.11	2	1.90283
2018-07-11	2444.57	3	-0.958344
2018-07-12	2443.97	4	-0.0245472
2018-07-13	2473.27	5	1.19174
2018-07-16	2386.23	1	-3.58264
2018-07-17	2369.76	2	-0.692603
2018-07-18	2313.38	3	-2.4079
2018-07-19	2277.92	4	-1.54469
2018-07-20	2306.67	5	1.25422
2018-07-23	2281.14	1	-1.11296
2018-07-24	2248.26	2	-1.45187
2018-07-25	2245.27	3	-0.13308
2018-07-26	2299.1	4	2.3692
2018-07-27	2235.64	5	-2.79902
2018-07-30	2239.25	1	0.161345
2018-07-31	2179.75	2	-2.69308
2018-08-01	2101.51	3	-3.65541
2018-08-02	2105.06	4	0.168784
2018-08-03	2081.92	5	-1.10534
2018-08-06	2135.31	1	2.53213
2018-08-07	2104.8	2	-1.43914
2018-08-08	2110.45	3	0.268074
2018-08-09	2088.82	4	-1.03019
2018-08-10	2082.42	5	-0.306863
2018-08-13	2086.18	1	0.180396
2018-08-14	2080.84	2	-0.256298
2018-08-15	2109.66	3	1.37551
2018-08-16	2123.46	4	0.652004
2018-08-17	2118.42	5	-0.237631
2018-08-20	2156.93	1	1.80154
2018-08-21	2211.54	2	2.50032
2018-08-22	2262.7	3	2.28697
2018-08-23	2285.43	4	0.99954
2018-08-24	2308.5	5	1.00438
2018-08-27	2294.7	1	-0.599585
2018-08-28	2278.75	2	-0.697507
2018-08-29	2299.07	3	0.887765
2018-08-30	2239.26	4	-2.63592
[truncated: 931 more rows]

## Sheet: Coffee
2010-12-31	197.47
2011-01-03	197.97	1	0.252883
2011-01-04	194.25	2	-1.89695
2011-01-05	192.57	3	-0.868627
2011-01-06	193.14	4	0.295559
2011-01-07	192.01	5	-0.586786
2011-01-10	192.91	1	0.46763
2011-01-11	195.73	2	1.45124
2011-01-12	200.62	3	2.46764
2011-01-13	198.43	4	-1.09762
2011-01-14	196.49	5	-0.982485
2011-01-17	196.74	1	0.127152
2011-01-18	197.47	2	0.370361
2011-01-19	195.39	3	-1.05891
2011-01-20	194.85	4	-0.276753
2011-01-21	200.54	5	2.87837
2011-01-24	199.53	1	-0.504913
2011-01-25	195.45	2	-2.066
2011-01-26	199.79	3	2.19622
2011-01-27	199.53	4	-0.130221
2011-01-28	205	5	2.70454
2011-01-31	205.97	1	0.472055
2011-02-01	209.38	2	1.64203
2011-02-02	210.15	3	0.367078
2011-02-03	211.02	4	0.413135
2011-02-04	208.77	5	-1.07197
2011-02-07	209.17	1	0.191415
2011-02-08	207.85	2	-0.633065
2011-02-09	211.89	3	1.92506
2011-02-10	213.47	4	0.742904
2011-02-11	211.71	5	-0.827889
2011-02-14	216.67	1	2.3158
2011-02-15	216.77	2	0.0461425
2011-02-16	216.93	3	0.0737837
2011-02-17	220.29	4	1.53701
2011-02-18	223.07	5	1.25408
2011-02-21	223.85	1	0.349056
2011-02-22	225.55	2	0.756568
2011-02-23	221.36	3	-1.87515
2011-02-24	217.8	4	-1.62131
2011-02-25	220.93	5	1.42687
2011-02-28	223.99	1	1.37555
2011-03-01	220.58	2	-1.5341
2011-03-02	220.39	3	-0.0861737
2011-03-03	222.89	4	1.12797
2011-03-04	222.96	5	0.0314007
2011-03-07	228.33	1	2.37996
2011-03-08	232.37	2	1.7539
2011-03-09	239.13	3	2.86764
2011-03-10	230.05	4	-3.87107
2011-03-11	224.23	5	-2.56244
2011-03-14	223.38	1	-0.379795
2011-03-15	216.63	2	-3.06835
2011-03-16	220.41	3	1.72986
2011-03-17	226.13	4	2.56206
2011-03-18	228.33	5	0.96819
2011-03-21	229.42	1	0.476243
2011-03-22	226.33	2	-1.35603
2011-03-23	223.25	3	-1.37019
2011-03-24	221.18	4	-0.931537
2011-03-25	224.55	5	1.51215
2011-03-28	221.15	1	-1.52572
2011-03-29	217.94	2	-1.46214
2011-03-30	220.08	3	0.977132
2011-03-31	219.81	4	-0.122758
2011-04-01	215.31	5	-2.06847
2011-04-04	212.51	1	-1.30898
2011-04-05	221.3	2	4.05302
2011-04-06	219.82	3	-0.671022
2011-04-07	224.94	4	2.30247
2011-04-08	225.41	5	0.208727
2011-04-11	225.43	1	0.00887233
2011-04-12	224.48	2	-0.422307
2011-04-13	230.21	3	2.52053
2011-04-14	231.23	4	0.442095
2011-04-15	234.46	5	1.38721
2011-04-18	232.52	1	-0.830875
2011-04-19	237.32	2	2.04332
2011-04-20	241.62	3	1.79568
2011-04-21	240.5	4	-0.464615
2011-04-22	240.5	5	0
2011-04-25	237.15	1	-1.40272
2011-04-26	241.28	2	1.72652
2011-04-27	241.08	3	-0.0829256
2011-04-28	241.08	4	0
2011-04-29	241.08	5	0
2011-05-02	247.39	1	2.58372
2011-05-03	247.63	2	0.0969658
2011-05-04	239.88	3	-3.17969
2011-05-05	236.42	4	-1.45289
2011-05-06	237.04	5	0.261902
2011-05-09	236.44	1	-0.253443
2011-05-10	233.45	2	-1.27266
2011-05-11	227.09	3	-2.76215
2011-05-12	226.69	4	-0.176297
2011-05-13	225.17	5	-0.672777
2011-05-16	220.18	1	-2.24103
2011-05-17	221.44	2	0.570628
2011-05-18	226.21	3	2.13121
2011-05-19	223.18	4	-1.34852
2011-05-20	218.04	5	-2.33001
2011-05-23	219.93	1	0.863078
2011-05-24	219.62	2	-0.141053
2011-05-25	222.62	3	1.35675
2011-05-26	222.17	4	-0.202343
2011-05-27	221.31	5	-0.387842
2011-05-30	221.43	1	0.0542079
2011-05-31	221.98	2	0.248078
2011-06-01	216.73	3	-2.39349
2011-06-02	219.1	4	1.08759
2011-06-03	224.31	5	2.35008
2011-06-06	217.01	1	-3.30856
2011-06-07	219.99	2	1.36387
2011-06-08	219.99	3	0
2011-06-09	222.35	4	1.06706
2011-06-10	220.95	5	-0.631629
2011-06-13	222.16	1	0.546141
2011-06-14	221.02	2	-0.514465
2011-06-15	218.66	3	-1.07352
2011-06-16	216.03	4	-1.21007
2011-06-17	210.4	5	-2.64068
2011-06-20	205.35	1	-2.42946
2011-06-21	204.85	2	-0.243784
2011-06-22	204.92	3	0.0341655
2011-06-23	205.22	4	0.146292
2011-06-24	207.86	5	1.27822
2011-06-27	210.14	1	1.09092
2011-06-28	216.63	2	3.04169
2011-06-29	216.87	3	0.110727
2011-06-30	222.32	4	2.48197
2011-07-01	220.95	5	-0.618135
2011-07-04	221.1	1	0.0678656
2011-07-05	222.82	2	0.774918
2011-07-06	222.57	3	-0.112261
2011-07-07	223.64	4	0.479596
2011-07-08	219.82	5	-1.72286
2011-07-11	215.04	1	-2.1985
2011-07-12	213.73	2	-0.611052
2011-07-13	218.3	3	2.11567
2011-07-14	214.29	4	-1.854
2011-07-15	210.81	5	-1.6373
2011-07-18	206.94	1	-1.85284
2011-07-19	203.67	2	-1.59279
2011-07-20	202.25	3	-0.699648
2011-07-21	198.56	4	-1.84132
2011-07-22	199.22	5	0.331842
2011-07-25	202.06	1	1.41549
2011-07-26	203.65	2	0.783815
2011-07-27	200.64	3	-1.48906
2011-07-28	198.52	4	-1.06224
2011-07-29	199	5	0.241497
2011-08-01	200.06	1	0.53125
2011-08-02	201.76	2	0.846155
2011-08-03	200.44	3	-0.656392
2011-08-04	195.85	4	-2.31659
2011-08-05	196.98	5	0.575314
2011-08-08	195.96	1	-0.519164
2011-08-09	197.03	2	0.544544
2011-08-10	197.78	3	0.37993
2011-08-11	202.41	4	2.314
2011-08-12	203.01	5	0.29599
2011-08-15	206.85	1	1.87387
2011-08-16	210.91	2	1.94376
2011-08-17	218.74	3	3.64523
2011-08-18	218.39	4	-0.160135
2011-08-19	219.81	5	0.648108
2011-08-22	220.19	1	0.172727
2011-08-23	223.05	2	1.29052
2011-08-24	224.34	3	0.57668
2011-08-25	224.81	4	0.209284
2011-08-26	226.88	5	0.916564
2011-08-29	230.5	1	1.58296
2011-08-30	231.8	2	0.562407
2011-08-31	232.79	3	0.426183
2011-09-01	234.26	4	0.629485
2011-09-02	233.24	5	-0.436364
2011-09-05	230.74	1	-1.07764
2011-09-06	226.76	2	-1.73993
2011-09-07	228.59	3	0.803782
2011-09-08	229.07	4	0.209763
2011-09-09	219.46	5	-4.28577
2011-09-12	220.96	1	0.681171
2011-09-13	220.02	2	-0.426324
2011-09-14	216.53	3	-1.59893
2011-09-15	213.38	4	-1.46545
2011-09-16	214.04	5	0.30883
2011-09-19	214.71	1	0.312537
2011-09-20	213.5	2	-0.565145
2011-09-21	207.67	3	-2.76866
2011-09-22	199.63	4	-3.94846
2011-09-23	193.12	5	-3.31539
2011-09-26	195.69	1	1.322
2011-09-27	198.2	2	1.27448
2011-09-28	193.7	3	-2.29661
2011-09-29	192.58	4	-0.579892
2011-09-30	190.95	5	-0.850004
2011-10-03	190.25	1	-0.367262
2011-10-04	190.77	2	0.272952
2011-10-05	191.23	3	0.240838
2011-10-06	195.99	4	2.45867
2011-10-07	190.28	5	-2.9567
2011-10-10	190.03	1	-0.131472
2011-10-11	187.5	2	-1.34031
2011-10-12	190.35	3	1.50856
2011-10-13	196.33	4	3.09324
2011-10-14	199.3	5	1.50143
2011-10-17	194.07	1	-2.65923
2011-10-18	192.67	2	-0.724004
2011-10-19	195.22	3	1.31482
2011-10-20	191.93	4	-1.69964
2011-10-21	200.69	5	4.46307
2011-10-24	204.78	1	2.01748
2011-10-25	195.24	2	-4.77067
2011-10-26	194.93	3	-0.158905
2011-10-27	195.34	4	0.210111
2011-10-28	195.67	5	0.168794
2011-10-31	189.32	1	-3.29909
2011-11-01	187.67	2	-0.87536
2011-11-02	188.69	3	0.542036
2011-11-03	189.68	4	0.523298
2011-11-04	191.52	5	0.96538
2011-11-07	193.92	1	1.24535
2011-11-08	192.87	2	-0.542932
2011-11-09	192.43	3	-0.228394
2011-11-10	193.69	4	0.652649
2011-11-11	196.19	5	1.28246
2011-11-14	194.33	1	-0.952583
2011-11-15	197.75	2	1.74459
2011-11-16	195.99	3	-0.893997
2011-11-17	193.79	4	-1.12885
2011-11-18	195.43	5	0.842716
2011-11-21	195.19	1	-0.122882
2011-11-22	195.56	2	0.189379
2011-11-23	194.98	3	-0.297025
2011-11-24	195.26	4	0.143501
2011-11-25	194.2	5	-0.544345
2011-11-28	191.72	1	-1.28526
2011-11-29	192.26	2	0.281265
2011-11-30	197.45	3	2.66368
2011-12-01	197.8	4	0.177103
2011-12-02	194.77	5	-1.5437
2011-12-05	198.77	1	2.0329
2011-12-06	198.14	2	-0.317453
2011-12-07	193.37	3	-2.43684
2011-12-08	191.77	4	-0.830871
2011-12-09	192.09	5	0.166727
2011-12-12	187.52	1	-2.40785
2011-12-13	188.88	2	0.722639
2011-12-14	184.97	3	-2.09182
2011-12-15	184.64	4	-0.178567
2011-12-16	183.28	5	-0.739295
2011-12-19	185.05	1	0.961102
2011-12-20	188.62	2	1.91084
2011-12-21	186.18	3	-1.30205
2011-12-22	185.55	4	-0.338956
2011-12-23	185.55	5	0
2011-12-26	185.55	1	0
2011-12-27	185.55	2	0
2011-12-28	185.55	3	0
2011-12-29	185.55	4	0
2011-12-30	185.55	5	0
2012-01-02	187.76	1	1.18402
2012-01-03	191.24	2	1.83646
2012-01-04	190.48	3	-0.398198
2012-01-05	185.7	4	-2.54147
2012-01-06	185.24	5	-0.248019
2012-01-09	186.02	1	0.420191
2012-01-10	188.74	2	1.45162
2012-01-11	194.69	3	3.10381
2012-01-12	195.77	4	0.553195
2012-01-13	190.44	5	-2.76033
2012-01-16	189.86	1	-0.305023
2012-01-17	190.31	2	0.236736
2012-01-18	190.21	3	-0.0525597
2012-01-19	191.63	4	0.74377
2012-01-20	192.07	5	0.229346
2012-01-23	187.73	1	-2.28551
2012-01-24	188.07	2	0.180947
2012-01-25	186.31	3	-0.940228
2012-01-26	187.41	4	0.588678
2012-01-27	186.14	5	-0.679965
2012-01-30	185.47	1	-0.360593
2012-01-31	184.41	2	-0.57316
2012-02-01	183.68	3	-0.396643
2012-02-02	184.13	4	0.244692
2012-02-03	185.17	5	0.563229
2012-02-06	186.14	1	0.522476
2012-02-07	188.48	2	1.24928
2012-02-08	188.23	3	-0.132728
2012-02-09	187.35	4	-0.468609
2012-02-10	186.82	5	-0.283294
2012-02-13	185.18	1	-0.881726
2012-02-14	180.44	2	-2.593
2012-02-15	179.51	3	-0.51674
2012-02-16	178.99	4	-0.290098
2012-02-17	179.29	5	0.167467
2012-02-20	177.61	1	-0.941447
2012-02-21	180.5	2	1.61406
2012-02-22	177.8	3	-1.50715
2012-02-23	179.02	4	0.683821
2012-02-24	180.05	5	0.573706
2012-02-27	180.18	1	0.0721761
2012-02-28	180.57	2	0.216216
2012-02-29	178.88	3	-0.940332
2012-03-01	179.38	4	0.279127
2012-03-02	178.35	5	-0.575855
2012-03-05	178.04	1	-0.173967
2012-03-06	172.33	2	-3.2597
2012-03-07	169.71	3	-1.53201
2012-03-08	171.32	4	0.944205
2012-03-09	169.38	5	-1.13884
2012-03-12	166.97	1	-1.43306
2012-03-13	167.56	2	0.352734
2012-03-14	166.51	3	-0.628613
2012-03-15	167.73	4	0.730018
2012-03-16	166.1	5	-0.976553
2012-03-19	166.5	1	0.240529
2012-03-20	166.6	2	0.060042
2012-03-21	165.88	3	-0.433109
2012-03-22	158.98	4	-4.24862
2012-03-23	160.09	5	0.695775
2012-03-26	160.14	1	0.0312276
2012-03-27	167.33	2	4.39195
2012-03-28	165.95	3	-0.828137
2012-03-29	161.82	4	-2.52019
2012-03-30	164.35	5	1.55137
2012-04-02	166.5	1	1.2997
2012-04-03	164.61	2	-1.14163
2012-04-04	164.43	3	-0.109409
2012-04-05	162.84	4	-0.971682
2012-04-06	162.34	5	-0.307522
2012-04-09	159.73	1	-1.6208
2012-04-10	160.21	2	0.300056
2012-04-11	161.64	3	0.888619
2012-04-12	162.34	4	0.432126
2012-04-13	160.5	5	-1.1399
2012-04-16	157.4	1	-1.95036
2012-04-17	157.06	2	-0.216244
2012-04-18	156.9	3	-0.101924
2012-04-19	157.4	4	0.318168
2012-04-20	159.94	5	1.60084
2012-04-23	160.09	1	0.0937412
2012-04-24	163.02	2	1.81367
2012-04-25	159.24	3	-2.34604
2012-04-26	157.43	4	-1.14316
2012-04-27	157.35	5	-0.0508292
2012-04-30	158.64	1	0.816486
2012-05-01	161.59	2	1.84248
2012-05-02	161.2	3	-0.241643
2012-05-03	155.71	4	-3.46505
2012-05-04	156.67	5	0.614638
2012-05-07	156.9	1	0.146698
2012-05-08	157.3	2	0.254615
2012-05-09	156.73	3	-0.363023
2012-05-10	160.21	4	2.19609
2012-05-11	159.8	5	-0.256242
2012-05-14	159.96	1	0.100075
2012-05-15	161.22	2	0.784611
2012-05-16	161.19	3	-0.0186098
2012-05-17	162.2	4	0.624635
2012-05-18	161.98	5	-0.135727
2012-05-21	158.88	1	-1.93237
2012-05-22	158.92	2	0.0251731
2012-05-23	154.09	3	-3.08641
2012-05-24	154.72	4	0.408018
2012-05-25	154.5	5	-0.142294
2012-05-28	154.5	1	0
2012-05-29	153.72	2	-0.506133
2012-05-30	151.81	3	-1.2503
2012-05-31	149.65	4	-1.43305
2012-06-01	147.15	5	-1.68468
2012-06-04	147.2	1	0.0339732
2012-06-05	146.36	2	-0.572287
2012-06-06	146.02	3	-0.232574
2012-06-07	145.32	4	-0.480539
2012-06-08	144.78	5	-0.372286
2012-06-11	143.59	1	-0.825333
2012-06-12	142.92	2	-0.467698
2012-06-13	142.62	3	-0.210128
2012-06-14	140.89	4	-1.22043
2012-06-15	141.21	5	0.22687
2012-06-18	141.23	1	0.0141623
2012-06-19	145.76	2	3.15717
2012-06-20	142.21	3	-2.46566
2012-06-21	145.53	4	2.30774
2012-06-22	142.5	5	-2.10403
2012-06-25	144.61	1	1.46985
2012-06-26	150.49	2	3.98562
2012-06-27	149.25	3	-0.827388
2012-06-28	148.57	4	-0.456652
2012-06-29	153.22	5	3.08186
2012-07-02	155.65	1	1.57351
2012-07-03	159.54	2	2.46848
2012-07-04	158.79	3	-0.47121
2012-07-05	159.48	4	0.433595
2012-07-06	156.24	5	-2.05252
2012-07-09	158.09	1	1.17712
2012-07-10	159.45	2	0.85659
2012-07-11	160.63	3	0.737319
2012-07-12	158.25	4	-1.49275
2012-07-13	161.21	5	1.85318
2012-07-16	160.59	1	-0.385333
2012-07-17	158.94	2	-1.03278
2012-07-18	159.5	3	0.351715
2012-07-19	164.77	4	3.25066
2012-07-20	164.38	5	-0.236974
2012-07-23	162.54	1	-1.12567
2012-07-24	157.91	2	-2.88989
2012-07-25	156.43	3	-0.941662
2012-07-26	156.17	4	-0.166347
2012-07-27	156.93	5	0.485469
2012-07-30	157.98	1	0.66686
2012-07-31	155.98	2	-1.27406
2012-08-01	154.98	3	-0.643172
2012-08-02	154.08	4	-0.582413
2012-08-03	154.62	5	0.349855
2012-08-06	156.43	1	1.16381
2012-08-07	154.14	2	-1.47473
2012-08-08	152.37	3	-1.15495
2012-08-09	149.71	4	-1.76117
2012-08-10	149.22	5	-0.327836
2012-08-13	147.28	1	-1.30862
2012-08-14	145.92	2	-0.927701
2012-08-15	144.91	3	-0.694567
2012-08-16	143.37	4	-1.06842
2012-08-17	144.08	5	0.494
2012-08-20	145.6	1	1.04944
2012-08-21	145.59	2	-0.00686837
2012-08-22	143.77	3	-1.25797
2012-08-23	144.35	4	0.402611
2012-08-24	145.63	5	0.882825
2012-08-27	148.54	1	1.97851
2012-08-28	149.05	2	0.342754
2012-08-29	148.59	3	-0.309098
2012-08-30	146.56	4	-1.37559
2012-08-31	146.7	5	0.0954784
2012-09-03	147.16	1	0.313075
2012-09-04	147.36	2	0.135814
2012-09-05	144.24	3	-2.14
2012-09-06	142.63	4	-1.12247
2012-09-07	145.2	5	1.78582
2012-09-10	151.19	1	4.04252
2012-09-11	154.24	2	1.99725
2012-09-12	154.67	3	0.278398
2012-09-13	155.19	4	0.335636
2012-09-14	156.88	5	1.0831
2012-09-17	154.1	1	-1.78794
2012-09-18	154.17	2	0.0454147
2012-09-19	152.19	3	-1.29261
2012-09-20	149.36	4	-1.87702
2012-09-21	152.47	5	2.06084
2012-09-24	151.76	1	-0.466753
2012-09-25	153.72	2	1.28324
2012-09-26	150.91	3	-1.84491
2012-09-27	154.44	4	2.3122
2012-09-28	153.8	5	-0.415261
2012-10-01	156.04	1	1.44593
2012-10-02	160.22	2	2.64355
2012-10-03	159.8	3	-0.262484
2012-10-04	154.69	4	-3.24999
2012-10-05	149.86	5	-3.17216
2012-10-08	149.79	1	-0.0467212
2012-10-09	147.68	2	-1.41865
2012-10-10	146.98	3	-0.475125
2012-10-11	144.96	4	-1.38387
2012-10-12	145.29	5	0.22739
2012-10-15	144.38	1	-0.628303
2012-10-16	145.29	2	0.628303
2012-10-17	144.46	3	-0.572909
2012-10-18	142.43	4	-1.4152
2012-10-19	144.7	5	1.5812
2012-10-22	146.67	1	1.35225
2012-10-23	144.24	2	-1.67066
2012-10-24	143.89	3	-0.242946
2012-10-25	144.32	4	0.298394
2012-10-26	142.07	5	-1.57132
2012-10-29	144.15	1	1.45345
2012-10-30	141.95	2	-1.53795
2012-10-31	139.95	3	-1.41897
2012-11-01	139.6	4	-0.250403
2012-11-02	140.39	5	0.564307
2012-11-05	137.51	1	-2.07276
2012-11-06	136.79	2	-0.524974
2012-11-07	138.44	3	1.19901
2012-11-08	138.79	4	0.252498
2012-11-09	138.24	5	-0.397069
2012-11-12	140.16	1	1.37933
2012-11-13	135.21	2	-3.59555
2012-11-14	135.46	3	0.184727
2012-11-15	135.64	4	0.132792
2012-11-16	135.36	5	-0.206642
2012-11-19	138.1	1	2.00402
2012-11-20	134.33	2	-2.76786
2012-11-21	134.7	3	0.275062
2012-11-22	135.01	4	0.229877
2012-11-23	133.08	5	-1.43984
2012-11-26	132.02	1	-0.799702
2012-11-27	132.93	2	0.686925
2012-11-28	136.17	3	2.40814
2012-11-29	137.43	4	0.921059
2012-11-30	134.44	5	-2.19967
2012-12-03	133.46	1	-0.73162
2012-12-04	131.39	2	-1.56318
2012-12-05	131.69	3	0.228068
2012-12-06	133.61	4	1.44744
2012-12-07	134.57	5	0.71594
2012-12-10	130.89	1	-2.77272
2012-12-11	132.61	2	1.30552
2012-12-12	131.25	3	-1.03086
2012-12-13	129.44	4	-1.38864
2012-12-14	128.67	5	-0.596647
2012-12-17	129.73	1	0.820438
2012-12-18	128.73	2	-0.773818
2012-12-19	130.27	3	1.1892
2012-12-20	129.41	4	-0.662356
2012-12-21	130.03	5	0.477953
2012-12-24	131.07	1	0.796634
2012-12-25	131.07	2	0
2012-12-26	132.47	3	1.06247
2012-12-27	133.57	4	0.826948
2012-12-28	132.79	5	-0.585675
2012-12-31	130.6	1	-1.66297
2013-01-01	130.6	2	0
2013-01-02	134.79	3	3.15788
2013-01-03	132.89	4	-1.41963
2013-01-04	133.18	5	0.217988
2013-01-07	134.71	1	1.14227
2013-01-08	133.86	2	-0.632984
2013-01-09	134.06	3	0.149298
2013-01-10	134.27	4	0.156524
2013-01-11	136.9	5	1.9398
2013-01-14	138.1	1	0.872733
2013-01-15	137.58	2	-0.377249
2013-01-16	137.57	3	-0.00726876
2013-01-17	138.9	4	0.962137
2013-01-18	139.44	5	0.388015
2013-01-21	138.87	1	-0.409616
2013-01-22	134.09	2	-3.5027
2013-01-23	135.61	3	1.12719
2013-01-24	132.98	4	-1.95844
2013-01-25	133.67	5	0.517534
2013-01-28	133.68	1	0.00748083
2013-01-29	134.71	2	0.767544
2013-01-30	134.05	3	-0.491146
2013-01-31	134.41	4	0.268197
2013-02-01	135.21	5	0.59343
2013-02-04	133.29	1	-1.43019
2013-02-05	133.42	2	0.0974842
2013-02-06	132.37	3	-0.790102
2013-02-07	131.24	4	-0.857332
2013-02-08	132.03	5	0.600146
2013-02-11	131.22	1	-0.615387
2013-02-12	131.54	2	0.243568
2013-02-13	130.89	3	-0.495371
2013-02-14	129.66	4	-0.944164
2013-02-15	129.36	5	-0.231642
2013-02-18	129.29	1	-0.0541272
2013-02-19	127.92	2	-1.06529
2013-02-20	130.62	3	2.08873
2013-02-21	130.71	4	0.0688784
2013-02-22	132.23	5	1.15617
2013-02-25	131.77	1	-0.348485
2013-02-26	132.31	2	0.408968
2013-02-27	132.55	3	0.181228
2013-02-28	132.52	4	-0.0226355
2013-03-01	132.49	5	-0.0226407
2013-03-04	135.3	1	2.09874
2013-03-05	130.89	2	-3.31373
2013-03-06	131.69	3	0.60934
2013-03-07	133.21	4	1.14762
2013-03-08	134.33	5	0.837263
2013-03-11	134.78	1	0.334436
2013-03-12	134.49	2	-0.215397
2013-03-13	133.1	3	-1.03891
2013-03-14	131.97	4	-0.85261
2013-03-15	131.25	5	-0.547072
2013-03-18	129	1	-1.72915
2013-03-19	128.52	2	-0.372787
2013-03-20	128.55	3	0.0233399
2013-03-21	128.93	4	0.295169
2013-03-22	129.3	5	0.286566
2013-03-25	129.71	1	0.31659
2013-03-26	130.5	2	0.607204
2013-03-27	129.43	3	-0.823303
2013-03-28	130.19	4	0.585473
2013-03-29	130.19	5	0
2013-04-01	131.04	1	0.65077
2013-04-02	129.4	2	-1.25942
2013-04-03	131.66	3	1.73145
2013-04-04	131.58	4	-0.060781
2013-04-05	131.83	5	0.189818
2013-04-08	129.61	1	-1.69833
2013-04-09	128.85	2	-0.5881
2013-04-10	128.95	3	0.0775795
2013-04-11	129.61	4	0.510521
2013-04-12	128.82	5	-0.611386
2013-04-15	128.01	1	-0.63077
2013-04-16	128.67	2	0.51426
2013-04-17	128.97	3	0.232883
2013-04-18	131.47	4	1.91989
2013-04-19	133	5	1.15704
2013-04-22	132.84	1	-0.120373
2013-04-23	128.57	2	-3.26719
2013-04-24	128.85	3	0.217543
2013-04-25	128.19	4	-0.51354
2013-04-26	126.76	5	-1.1218
2013-04-29	126.42	1	-0.268584
2013-04-30	126.68	2	0.205452
2013-05-01	126.43	3	-0.197543
2013-05-02	129.44	4	2.35287
2013-05-03	130.18	5	0.570065
2013-05-06	130.56	1	0.291478
2013-05-07	131.1	2	0.41275
2013-05-08	131.5	3	0.304646
2013-05-09	134.21	4	2.03989
2013-05-10	131.45	5	-2.07792
2013-05-13	132.93	1	1.11961
2013-05-14	131.98	2	-0.717228
2013-05-15	129.82	3	-1.65015
2013-05-16	128.95	4	-0.672414
2013-05-17	128.01	5	-0.731635
2013-05-20	126.75	1	-0.989174
2013-05-21	125.52	2	-0.975153
2013-05-22	123.33	3	-1.76014
2013-05-23	123.42	4	0.0729483
2013-05-24	121.38	5	-1.66671
2013-05-27	121.47	1	0.0741198
2013-05-28	120.37	2	-0.909699
2013-05-29	120.64	3	0.224057
2013-05-30	119.46	4	-0.982932
2013-05-31	121.26	5	1.49554
2013-06-03	122.58	1	1.08269
2013-06-04	121.85	2	-0.59731
2013-06-05	121.22	3	-0.51837
2013-06-06	122.28	4	0.870642
2013-06-07	120.87	5	-1.15979
2013-06-10	121.68	1	0.667906
2013-06-11	120.48	2	-0.991088
2013-06-12	117.17	3	-2.78579
2013-06-13	116.78	4	-0.333405
2013-06-14	116.22	5	-0.480688
2013-06-17	116.04	1	-0.154999
2013-06-18	115.71	2	-0.28479
2013-06-19	117.32	3	1.38182
2013-06-20	113.37	4	-3.42484
2013-06-21	114.34	5	0.851966
2013-06-24	114.84	1	0.436339
2013-06-25	114.46	2	-0.331444
2013-06-26	113.56	3	-0.789409
2013-06-27	115.74	4	1.9015
2013-06-28	114.99	5	-0.650113
2013-07-01	116.15	1	1.00373
2013-07-02	118.77	2	2.23064
2013-07-03	116.57	3	-1.86969
2013-07-04	116.67	4	0.0857486
2013-07-05	116.5	5	-0.145816
2013-07-08	118.15	1	1.40637
2013-07-09	117.79	2	-0.305163
2013-07-10	117.86	3	0.0594101
2013-07-11	119	4	0.962601
2013-07-12	116.49	5	-2.13181
2013-07-15	119.41	1	2.47575
2013-07-16	121.1	2	1.40537
2013-07-17	123	3	1.55677
2013-07-18	123.95	4	0.76939
2013-07-19	120.77	5	-2.59903
2013-07-22	121.37	1	0.495582
2013-07-23	121.54	2	0.13997
2013-07-24	118.42	3	-2.60058
2013-07-25	120.2	4	1.49194
2013-07-26	119.22	5	-0.81865
2013-07-29	118.32	1	-0.757771
2013-07-30	117.83	2	-0.414991
2013-07-31	116.36	3	-1.25541
2013-08-01	114.59	4	-1.53283
2013-08-02	116.58	5	1.72172
2013-08-05	118.06	1	1.26152
2013-08-06	116.67	2	-1.18435
2013-08-07	118.86	3	1.85969
2013-08-08	119.59	4	0.61229
2013-08-09	121.36	5	1.46921
2013-08-12	121.63	1	0.222231
2013-08-13	118.71	2	-2.43001
2013-08-14	120.65	3	1.62102
2013-08-15	120.19	4	-0.381997
2013-08-16	119.29	5	-0.751632
2013-08-19	117.82	1	-1.23995
2013-08-20	115.16	2	-2.28356
2013-08-21	113.95	3	-1.05627
2013-08-22	112.85	4	-0.970025
2013-08-23	112.62	5	-0.204018
2013-08-26	113.26	1	0.566674
2013-08-27	112.35	2	-0.806706
2013-08-28	113.34	3	0.877315
2013-08-29	112.51	4	-0.735004
2013-08-30	111.91	5	-0.534713
2013-09-02	111.65	1	-0.2326
2013-09-03	112.71	2	0.944917
2013-09-04	112.35	3	-0.319915
2013-09-05	111.93	4	-0.374532
2013-09-06	112.79	5	0.765401
2013-09-09	112.89	1	0.0886211
2013-09-10	112.21	2	-0.604178
2013-09-11	114.69	3	2.18607
2013-09-12	114.15	4	-0.471946
2013-09-13	113.86	5	-0.254375
2013-09-16	113.34	1	-0.457747
2013-09-17	110.03	2	-2.96391
2013-09-18	110.01	3	-0.0181785
2013-09-19	110.57	4	0.507753
2013-09-20	110.08	5	-0.444143
2013-09-23	111.72	1	1.47884
2013-09-24	112.41	2	0.615716
2013-09-25	112.49	3	0.0711427
2013-09-26	110.73	4	-1.57695
2013-09-27	108.75	5	-1.80431
2013-09-30	108.95	1	0.183739
2013-10-01	107.99	2	-0.885043
2013-10-02	108.65	3	0.609308
2013-10-03	109.52	4	0.797547
2013-10-04	109.52	5	0
2013-10-07	109.09	1	-0.393395
2013-10-08	109.25	2	0.14656
2013-10-09	109.61	3	0.328978
2013-10-10	109.72	4	0.100305
2013-10-11	110.87	5	1.04267
2013-10-14	111.03	1	0.144209
2013-10-15	109.95	2	-0.977472
2013-10-16	109.18	3	-0.702782
2013-10-17	108.16	4	-0.938628
2013-10-18	108.09	5	-0.0647399
2013-10-21	106.31	1	-1.66049
2013-10-22	106.34	2	0.0282154
2013-10-23	105	3	-1.26812
2013-10-24	104.78	4	-0.209744
2013-10-25	103.53	5	-1.20015
2013-10-28	101.78	1	-1.70478
2013-10-29	101.42	2	-0.354331
2013-10-30	101.47	3	0.0492878
2013-10-31	100.38	4	-1.08002
2013-11-01	100.54	5	0.159267
2013-11-04	99.46	1	-1.08001
2013-11-05	99.22	2	-0.241595
2013-11-06	97.77	3	-1.47218
2013-11-07	99.14	4	1.39152
2013-11-08	99.61	5	0.472957
2013-11-11	99.7	1	0.0903116
2013-11-12	100.95	2	1.24597
2013-11-13	98.57	3	-2.38584
2013-11-14	98.11	4	-0.467766
2013-11-15	101.09	5	2.99219
2013-11-18	102.5	1	1.38516
2013-11-19	101.89	2	-0.5969
2013-11-20	103.18	3	1.25812
2013-11-21	103.96	4	0.753117
2013-11-22	101.55	5	-2.34549
2013-11-25	101.78	1	0.226233
2013-11-26	102.69	2	0.890112
2013-11-27	102.29	3	-0.390282
2013-11-28	102.58	4	0.283107
2013-11-29	104.3	5	1.66284
2013-12-02	103.62	1	-0.6541
2013-12-03	104.41	2	0.759509
2013-12-04	103.72	3	-0.66305
2013-12-05	101.75	4	-1.91761
2013-12-06	102.52	5	0.753908
2013-12-09	102.61	1	0.0877492
2013-12-10	106.7	2	3.90858
2013-12-11	105.69	3	-0.951088
2013-12-12	107	4	1.23186
2013-12-13	109.44	5	2.25476
2013-12-16	109.24	1	-0.182916
2013-12-17	107.53	2	-1.57774
2013-12-18	108.29	3	0.704294
2013-12-19	107.44	4	-0.788026
2013-12-20	107.44	5	0
2013-12-23	107.44	1	0
2013-12-24	107.44	2	0
2013-12-25	107.44	3	0
2013-12-26	107.44	4	0
2013-12-27	107.44	5	0
2013-12-30	107.44	1	0
2013-12-31	107.44	2	0
2014-01-01	107.44	3	0
2014-01-02	104.52	4	-2.75541
2014-01-03	108.08	5	3.34933
2014-01-06	111.89	1	3.46446
2014-01-07	110.03	2	-1.67632
2014-01-08	112.29	3	2.03318
2014-01-09	111.59	4	-0.625337
2014-01-10	112.14	5	0.491665
2014-01-13	111.74	1	-0.357335
2014-01-14	111.53	2	-0.188113
2014-01-15	109.71	3	-1.64531
2014-01-16	110.81	4	0.99765
2014-01-17	110.69	5	-0.108352
2014-01-20	110.72	1	0.027099
2014-01-21	109.74	2	-0.889056
2014-01-22	109.02	3	-0.658258
2014-01-23	109.85	4	0.758445
2014-01-24	109.46	5	-0.355661
2014-01-27	109.81	1	0.319241
2014-01-28	109.82	2	0.00910622
2014-01-29	111.51	3	1.52716
2014-01-30	113.9	4	2.12066
2014-01-31	117.56	5	3.1628
2014-02-03	124.75	1	5.93629
2014-02-04	124.19	2	-0.449908
2014-02-05	129.24	3	3.98585
2014-02-06	126.4	4	-2.22197
2014-02-07	125	5	-1.11377
2014-02-10	125.5	1	0.399202
2014-02-11	126.53	2	0.817368
2014-02-12	128.67	3	1.67716
2014-02-13	128.44	4	-0.178912
2014-02-14	128.59	5	0.116718
2014-02-17	128.89	1	0.233028
2014-02-18	137.33	2	6.34275
2014-02-19	149.13	3	8.24316
2014-02-20	148	4	-0.760614
2014-02-21	149.33	5	0.894635
2014-02-24	154.3	1	3.27401
2014-02-25	154.17	2	-0.084287
2014-02-26	154.18	3	0.00648614
2014-02-27	155.98	4	1.1607
2014-02-28	157.53	5	0.988812
2014-03-03	165.5	1	4.93553
2014-03-04	161.53	2	-2.42803
2014-03-05	170.13	3	5.1872
2014-03-06	167.09	4	-1.80303
2014-03-07	169.52	5	1.44383
2014-03-10	174.23	1	2.74054
2014-03-11	176.37	2	1.22078
2014-03-12	176.5	3	0.0736815
2014-03-13	177.29	4	0.446593
2014-03-14	172.24	5	-2.8898
2014-03-17	167.66	1	-2.69507
2014-03-18	167.25	2	-0.244842
2014-03-19	163.34	3	-2.36558
2014-03-20	155.47	4	-4.93811
2014-03-21	153.33	5	-1.38603
2014-03-24	157.28	1	2.54352
2014-03-25	156.61	2	-0.426902
2014-03-26	157.15	3	0.344212
2014-03-27	157.71	4	0.355714
2014-03-28	160.55	5	1.78475
2014-03-31	158.9	1	-1.03303
2014-04-01	156.19	2	-1.72019
2014-04-02	154.56	3	-1.04908
2014-04-03	155.49	4	0.599905
2014-04-04	162.35	5	4.31731
2014-04-07	168.49	1	3.71219
2014-04-08	171.55	2	1.79984
2014-04-09	172.53	3	0.569637
2014-04-10	177.16	4	2.64821
2014-04-11	174.7	5	-1.39831
2014-04-14	176.59	1	1.07604
2014-04-15	170.3	2	-3.62691
2014-04-16	164.65	3	-3.37396
2014-04-17	171.02	4	3.79585
2014-04-18	171.02	5	0
2014-04-21	168.29	1	-1.60918
2014-04-22	175.59	2	4.24631
2014-04-23	178.96	3	1.90106
2014-04-24	178.8	4	-0.0894454
2014-04-25	177.36	5	-0.80863
2014-04-28	173.48	1	-2.21192
2014-04-29	177.68	2	2.39219
2014-04-30	176.41	3	-0.717335
2014-05-01	175.18	4	-0.699681
2014-05-02	175.42	5	0.136908
2014-05-05	176.3	1	0.500399
2014-05-06	174.59	2	-0.974672
2014-05-07	174.01	3	-0.33276
2014-05-08	170.59	4	-1.98498
2014-05-09	160.95	5	-5.81693
2014-05-12	163.67	1	1.67584
2014-05-13	162.75	2	-0.563692
2014-05-14	160.47	3	-1.41083
2014-05-15	169.06	4	5.21467
2014-05-16	161.75	5	-4.42017
2014-05-19	160.64	1	-0.68861
2014-05-20	161.53	2	0.552505
2014-05-21	159.29	3	-1.39644
2014-05-22	159.26	4	-0.0188353
2014-05-23	159.18	5	-0.0502449
2014-05-26	158.93	1	-0.157178
2014-05-27	157.27	2	-1.04998
2014-05-28	153.33	3	-2.53716
2014-05-29	157.33	4	2.5753
2014-05-30	155.2	5	-1.36309
2014-06-02	152.2	1	-1.95192
2014-06-03	150.63	2	-1.03689
2014-06-04	150.29	3	-0.225974
2014-06-05	149.59	4	-0.466854
2014-06-06	150.75	5	0.772462
2014-06-09	145.87	1	-3.2907
2014-06-10	148.57	2	1.83404
2014-06-11	152.45	3	2.57804
2014-06-12	153.02	4	0.373196
2014-06-13	153.95	5	0.605924
2014-06-16	153.44	1	-0.331826
2014-06-17	150.35	2	-2.03437
2014-06-18	150.31	3	-0.0266081
2014-06-19	149.48	4	-0.553722
2014-06-20	153.43	5	2.60818
2014-06-23	153.97	1	0.351334
2014-06-24	152.76	2	-0.788972
2014-06-25	157.22	3	2.8778
2014-06-26	156.7	4	-0.331295
2014-06-27	152.84	5	-2.49415
2014-06-30	152.56	1	-0.183366
2014-07-01	150.84	2	-1.13383
2014-07-02	151.67	3	0.548744
2014-07-03	152.07	4	0.263383
2014-07-04	151.91	5	-0.10527
2014-07-07	151.11	1	-0.528019
2014-07-08	152.55	2	0.948436
2014-07-09	152.45	3	-0.0655738
2014-07-10	145.75	4	-4.49438
2014-07-11	145.14	5	-0.419403
2014-07-14	147.26	1	1.45009
2014-07-15	145.64	2	-1.10619
2014-07-16	146	3	0.24688
2014-07-17	147.02	4	0.696201
2014-07-18	151.26	5	2.84316
2014-07-21	152.35	1	0.71803
2014-07-22	149.98	2	-1.56786
2014-07-23	154.48	3	2.95627
2014-07-24	157.01	4	1.62449
2014-07-25	157.69	5	0.432158
2014-07-28	158.43	1	0.468177
2014-07-29	158.61	2	0.11355
2014-07-30	159.8	3	0.747467
2014-07-31	168.55	4	5.33094
2014-08-01	167.84	5	-0.42213
2014-08-04	163.88	1	-2.38767
2014-08-05	163.87	2	-0.00610221
2014-08-06	164.1	3	0.140257
2014-08-07	159.79	4	-2.66155
2014-08-08	157.82	5	-1.24053
2014-08-11	163.34	1	3.43788
2014-08-12	160.23	2	-1.92236
2014-08-13	161.17	3	0.584943
2014-08-14	159.48	4	-1.05412
2014-08-15	163.59	5	2.54448
2014-08-18	163.49	1	-0.0611471
2014-08-19	159.33	2	-2.57743
2014-08-20	160.81	3	0.924602
2014-08-21	161.69	4	0.545738
2014-08-22	160.68	5	-0.626611
2014-08-25	160.66	1	-0.0124479
2014-08-26	166.62	2	3.64254
2014-08-27	167.92	3	0.77719
2014-08-28	168.34	4	0.249807
2014-08-29	169.95	5	0.951853
2014-09-01	171.53	1	0.92539
2014-09-02	176.44	2	2.82227
2014-09-03	171.41	3	-2.89225
2014-09-04	172.31	4	0.523683
2014-09-05	168.21	5	-2.4082
2014-09-08	165.88	1	-1.39486
2014-09-09	165.06	2	-0.495559
2014-09-10	158.28	3	-4.19434
2014-09-11	158.85	4	0.359474
2014-09-12	158.17	5	-0.428996
2014-09-15	156.3	1	-1.18932
2014-09-16	158.16	2	1.18299
2014-09-17	157.65	3	-0.322979
2014-09-18	155.63	4	-1.2896
2014-09-19	153.64	5	-1.28692
2014-09-22	154.14	1	0.324908
2014-09-23	155.47	2	0.859151
2014-09-24	160.68	3	3.2962
2014-09-25	156.1	4	-2.8918
2014-09-26	159.07	5	1.88475
2014-09-29	162.1	1	1.88691
2014-09-30	164.37	2	1.39066
2014-10-01	169.63	3	3.14996
2014-10-02	174.6	4	2.8878
2014-10-03	174.57	5	-0.0171836
2014-10-06	183.6	1	5.04337
2014-10-07	181.32	2	-1.24961
2014-10-08	180.13	3	-0.658461
2014-10-09	185.09	4	2.71634
2014-10-10	183.28	5	-0.982716
2014-10-13	182.8	1	-0.262238
2014-10-14	183.84	2	0.567316
2014-10-15	181.26	3	-1.41333
2014-10-16	181.16	4	-0.0551846
2014-10-17	176.8	5	-2.43615
2014-10-20	168.74	1	-4.66601
2014-10-21	167.86	2	-0.522877
2014-10-22	163.99	3	-2.33248
2014-10-23	163.98	4	-0.00609812
2014-10-24	162.38	5	-0.98052
2014-10-27	162.31	1	-0.0431181
2014-10-28	163.31	2	0.614215
2014-10-29	162.5	3	-0.497223
2014-10-30	160.95	4	-0.958424
2014-10-31	162.08	5	0.699628
2014-11-03	161.17	1	-0.563033
2014-11-04	161.84	2	0.414848
2014-11-05	160.3	3	-0.956113
2014-11-06	158.79	4	-0.946449
2014-11-07	158.06	5	-0.460787
2014-11-10	158.08	1	0.0126526
2014-11-11	160.57	2	1.56288
2014-11-12	159.82	3	-0.46818
2014-11-13	163.14	4	2.05605
2014-11-14	164.68	5	0.939547
2014-11-17	162.83	1	-1.12975
2014-11-18	163.42	2	0.361686
2014-11-19	167.83	3	2.6628
2014-11-20	162.2	4	-3.41214
2014-11-21	162.44	5	0.147856
2014-11-24	163.51	1	0.656545
2014-11-25	165.12	2	0.979833
2014-11-26	164.72	3	-0.242542
2014-11-27	164.73	4	0.00607072
2014-11-28	160.17	5	-2.8072
2014-12-01	160.43	1	0.162196
2014-12-02	157.34	2	-1.94486
2014-12-03	157.45	3	0.0698879
2014-12-04	156.54	4	-0.579638
2014-12-05	154.84	5	-1.09192
2014-12-08	153.24	1	-1.0387
2014-12-09	154.39	2	0.747655
2014-12-10	152.87	3	-0.989398
2014-12-11	151.29	4	-1.03894
2014-12-12	149.74	5	-1.02981
2014-12-15	151.69	1	1.29385
2014-12-16	151.46	2	-0.15174
2014-12-17	148.35	3	-2.07472
2014-12-18	149.25	4	0.604841
2014-12-19	150.21	5	0.641156
2014-12-22	147.99	1	-1.48896
2014-12-23	146.77	2	-0.827797
2014-12-24	146.89	3	0.0817272
2014-12-25	146.89	4	0
2014-12-26	145	5	-1.29503
2014-12-29	142.29	1	-1.88665
2014-12-30	143.74	2	1.01389
2014-12-31	142.64	3	-0.768214
2015-01-01	142.64	4	0
2015-01-02	140.57	5	-1.46184
2015-01-05	145.97	1	3.76955
2015-01-06	150.58	2	3.10934
2015-01-07	151.28	3	0.463792
2015-01-08	153.36	4	1.36557
2015-01-09	155.09	5	1.12175
2015-01-12	153.71	1	-0.893788
2015-01-13	152.87	2	-0.547982
2015-01-14	155.4	3	1.64146
2015-01-15	153.76	4	-1.06095
2015-01-16	149.18	5	-3.02393
2015-01-19	149.63	1	0.301195
2015-01-20	145.34	2	-2.90898
2015-01-21	143.83	3	-1.04438
2015-01-22	142.77	4	-0.73971
2015-01-23	143.95	5	0.823107
2015-01-26	143.73	1	-0.152948
2015-01-27	147.57	2	2.63661
2015-01-28	147.95	3	0.257174
2015-01-29	143.09	4	-3.34006
2015-01-30	143.43	5	0.237331
2015-02-02	144.21	1	0.542346
2015-02-03	143.58	2	-0.43782
2015-02-04	146.7	3	2.14973
2015-02-05	146.15	4	-0.375619
2015-02-06	147.58	5	0.973691
2015-02-09	148.25	1	0.452964
2015-02-10	143.8	2	-3.04766
2015-02-11	143.29	3	-0.35529
2015-02-12	146.99	4	2.5494
2015-02-13	146.76	5	-0.156596
2015-02-16	147.85	1	0.739965
2015-02-17	142.15	2	-3.93154
2015-02-18	140.82	3	-0.940036
2015-02-19	137.84	4	-2.13889
2015-02-20	137.58	5	-0.188803
2015-02-23	134.84	1	-2.01167
2015-02-24	134.49	2	-0.259904
2015-02-25	130.85	3	-2.74382
2015-02-26	128.75	4	-1.61791
2015-02-27	129.6	5	0.658024
2015-03-02	127.73	1	-1.45341
2015-03-03	123.35	2	-3.48928
2015-03-04	126.35	3	2.403
2015-03-05	125.39	4	-0.762695
2015-03-06	128.6	5	2.52779
2015-03-09	127.46	1	-0.890422
2015-03-10	126.1	2	-1.07273
2015-03-11	123.82	3	-1.82463
2015-03-12	122.97	4	-0.688847
2015-03-13	120.5	5	-2.02907
2015-03-16	126.88	1	5.1592
2015-03-17	127.53	2	0.510987
2015-03-18	127.99	3	0.36005
2015-03-19	131.78	4	2.91817
2015-03-20	131.59	5	-0.144284
2015-03-23	131.15	1	-0.334932
2015-03-24	128.33	2	-2.17366
2015-03-25	130.02	3	1.30832
2015-03-26	130.16	4	0.107618
2015-03-27	128.39	5	-1.3692
2015-03-30	124.66	1	-2.94825
2015-03-31	124.13	2	-0.426063
2015-04-01	126.07	3	1.55079
2015-04-02	129.28	4	2.51433
2015-04-03	129.28	5	0
2015-04-06	132.46	1	2.43001
2015-04-07	131.76	2	-0.529863
2015-04-08	127.39	3	-3.37288
2015-04-09	128.37	4	0.766347
2015-04-10	127.82	5	-0.429369
2015-04-13	126.99	1	-0.651468
2015-04-14	126.71	2	-0.220733
2015-04-15	127.5	3	0.621535
2015-04-16	129.77	4	1.76473
2015-04-17	129.81	5	0.030819
2015-04-20	129.73	1	-0.0616475
2015-04-21	131.09	2	1.04287
2015-04-22	132.18	3	0.828052
2015-04-23	130.61	4	-1.19488
2015-04-24	130.74	5	0.0994835
2015-04-27	126.05	1	-3.6532
2015-04-28	127.82	2	1.39444
2015-04-29	127.88	3	0.04693
2015-04-30	129.31	4	1.11203
2015-05-01	126.92	5	-1.86557
2015-05-04	126.25	1	-0.52929
2015-05-05	125.53	2	-0.571929
2015-05-06	122.29	3	-2.61495
2015-05-07	122.83	4	0.440601
2015-05-08	124.98	5	1.73524
2015-05-11	124.85	1	-0.104071
2015-05-12	125.39	2	0.431586
2015-05-13	124.93	3	-0.36753
2015-05-14	126.17	4	0.987662
2015-05-15	127.55	5	1.08782
2015-05-18	130.59	1	2.35542
2015-05-19	129.14	2	-1.11656
2015-05-20	125.5	3	-2.85913
2015-05-21	121.35	4	-3.36268
2015-05-22	119.83	5	-1.26049
2015-05-25	118.03	1	-1.51352
2015-05-26	116.99	2	-0.885037
2015-05-27	117.35	3	0.307246
2015-05-28	117.9	4	0.467589
2015-05-29	118.94	5	0.878236
2015-06-01	122.58	1	3.01447
2015-06-02	124.39	2	1.46579
2015-06-03	125.35	3	0.768803
2015-06-04	126.39	4	0.826254
2015-06-05	125.98	5	-0.32492
2015-06-08	126.95	1	0.767014
2015-06-09	127.83	2	0.690795
2015-06-10	127.49	3	-0.266333
2015-06-11	124.16	4	-2.64669
2015-06-12	125.21	5	0.842127
2015-06-15	122.58	1	-2.12284
2015-06-16	123.75	2	0.949952
2015-06-17	122.05	3	-1.38326
2015-06-18	123.83	4	1.44789
2015-06-19	122.74	5	-0.884136
2015-06-22	125.15	1	1.94447
2015-06-23	122.65	2	-2.01782
2015-06-24	127.23	3	3.66617
2015-06-25	126.64	4	-0.464806
2015-06-26	126.56	5	-0.0631912
2015-06-29	125.15	1	-1.12035
2015-06-30	124.66	2	-0.392299
2015-07-01	121.33	3	-2.70759
2015-07-02	121.32	4	-0.00824232
2015-07-03	121.5	5	0.148258
2015-07-06	118.95	1	-2.1211
2015-07-07	118.52	2	-0.362151
2015-07-08	118.72	3	0.168606
2015-07-09	119.04	4	0.269179
2015-07-10	119.78	5	0.619716
2015-07-13	122.05	1	1.87741
2015-07-14	124.1	2	1.66569
2015-07-15	122.62	3	-1.19975
2015-07-16	121.96	4	-0.539702
2015-07-17	121.06	5	-0.740683
2015-07-20	120.72	1	-0.281248
2015-07-21	119.52	2	-0.999009
2015-07-22	120.04	3	0.43413
2015-07-23	117.4	4	-2.22381
2015-07-24	117.86	5	0.391057
2015-07-27	116.03	1	-1.56487
2015-07-28	116.02	2	-0.00861883
2015-07-29	117.23	3	1.03752
2015-07-30	119.27	4	1.7252
2015-07-31	119.62	5	0.293022
2015-08-03	118.65	1	-0.814207
2015-08-04	119.4	2	0.630122
2015-08-05	120.35	3	0.792496
2015-08-06	119.67	4	-0.566621
2015-08-07	122.2	5	2.09211
2015-08-10	125.44	1	2.61685
2015-08-11	128.07	2	2.07494
2015-08-12	124.61	3	-2.73881
2015-08-13	127.98	4	2.66851
2015-08-14	128.16	5	0.140548
2015-08-17	126.93	1	-0.964373
2015-08-18	126.86	2	-0.0551637
2015-08-19	123.77	3	-2.46591
2015-08-20	122.1	4	-1.35846
2015-08-21	117.6	5	-3.75513
2015-08-24	115.01	1	-2.227
2015-08-25	114.21	2	-0.698022
2015-08-26	115.33	3	0.975873
2015-08-27	116.98	4	1.42054
2015-08-28	116.09	5	-0.763723
2015-08-31	116.05	1	-0.034462
2015-09-01	114.34	2	-1.48447
2015-09-02	112.24	3	-1.8537
2015-09-03	112.86	4	0.550868
2015-09-04	113.16	5	0.265463
2015-09-07	112.66	1	-0.442831
2015-09-08	114.18	2	1.34017
2015-09-09	115.03	3	0.741681
2015-09-10	110.87	4	-3.68346
2015-09-11	110.73	5	-0.126354
2015-09-14	113.95	1	2.86649
2015-09-15	112.72	2	-1.08529
2015-09-16	112.5	3	-0.195365
2015-09-17	112.16	4	-0.30268
2015-09-18	111.92	5	-0.214209
2015-09-21	112.23	1	0.276601
2015-09-22	111.29	2	-0.841093
2015-09-23	111.72	3	0.385633
2015-09-24	113.08	4	1.20998
2015-09-25	116.7	5	3.1511
2015-09-28	113.94	1	-2.39345
2015-09-29	115.29	2	1.17787
2015-09-30	115.54	3	0.21661
2015-10-01	114.8	4	-0.642531
2015-10-02	117.27	5	2.12875
2015-10-05	119.92	1	2.23459
2015-10-06	119.95	2	0.0250135
2015-10-07	117.62	3	-1.96159
2015-10-08	119.72	4	1.76966
2015-10-09	122.45	5	2.25471
2015-10-12	124.19	1	1.41099
2015-10-13	124.25	2	0.0483014
2015-10-14	125.08	3	0.665787
2015-10-15	124.57	4	-0.408573
2015-10-16	119.26	5	-4.35618
2015-10-19	117.72	1	-1.29971
2015-10-20	117.51	2	-0.178549
2015-10-21	115.47	3	-1.75127
2015-10-22	114.71	4	-0.660355
2015-10-23	113.48	5	-1.07806
2015-10-26	113.95	1	0.413315
2015-10-27	114.03	2	0.0701816
2015-10-28	115.38	3	1.17695
2015-10-29	116.36	4	0.84578
2015-10-30	117.67	5	1.11953
2015-11-02	116.26	1	-1.2055
2015-11-03	117.69	2	1.2225
2015-11-04	118.11	3	0.356234
2015-11-05	118.3	4	0.160738
2015-11-06	115.45	5	-2.43862
2015-11-09	115.44	1	-0.00866213
2015-11-10	114.69	2	-0.651808
2015-11-11	115.17	3	0.417646
2015-11-12	113.2	4	-1.72531
2015-11-13	110.75	5	-2.18808
2015-11-16	112.94	1	1.95813
2015-11-17	112.53	2	-0.363685
2015-11-18	110.45	3	-1.86569
2015-11-19	115.12	4	4.14121
2015-11-20	117.19	5	1.78215
2015-11-23	114.9	1	-1.97344
2015-11-24	116.41	2	1.30563
2015-11-25	116.61	3	0.171659
2015-11-26	116.66	4	0.0428688
2015-11-27	115.52	5	-0.982005
2015-11-30	112.18	1	-2.9339
2015-12-01	113.02	2	0.746007
2015-12-02	113.63	3	0.538276
2015-12-03	115.53	4	1.65827
2015-12-04	117.12	5	1.36688
2015-12-07	116.87	1	-0.213684
2015-12-08	116.5	2	-0.317093
2015-12-09	117.14	3	0.547853
2015-12-10	116.9	4	-0.205093
2015-12-11	113.58	5	-2.88114
2015-12-14	112.83	1	-0.662517
2015-12-15	113.05	2	0.194794
2015-12-16	113	3	-0.044238
2015-12-17	112.27	4	-0.648113
2015-12-18	112.89	5	0.550721
2015-12-21	112.47	1	-0.372737
2015-12-22	113.45	2	0.867569
2015-12-23	115.96	3	2.18831
2015-12-24	114.11	4	-1.60824
2015-12-25	114.11	5	0
2015-12-28	113.56	1	-0.483156
2015-12-29	114.66	2	0.96399
2015-12-30	116.03	3	1.18776
2015-12-31	117.35	4	1.13121
2016-01-01	117.35	5	0
2016-01-04	116.3	1	-0.898786
2016-01-05	115.43	2	-0.750877
2016-01-06	113.28	3	-1.88017
2016-01-07	112.09	4	-1.05605
2016-01-08	112.64	5	0.489477
2016-01-11	109.33	1	-2.98261
2016-01-12	109.4	2	0.0640059
2016-01-13	109.96	3	0.510577
2016-01-14	110.01	4	0.0454607
2016-01-15	109.79	5	-0.200182
2016-01-18	109.62	1	-0.154961
2016-01-19	109.75	2	0.118521
2016-01-20	106.74	3	-2.78091
2016-01-21	108.22	4	1.37702
2016-01-22	109.97	5	1.60414
2016-01-25	110.34	1	0.335891
2016-01-26	110.38	2	0.036245
2016-01-27	112.15	3	1.59083
2016-01-28	112.27	4	0.106942
2016-01-29	110.09	5	-1.96085
2016-02-01	111.43	1	1.20984
2016-02-02	113.61	2	1.93749
2016-02-03	114.84	3	1.07683
2016-02-04	117.65	4	2.41743
2016-02-05	114.77	5	-2.4784
2016-02-08	111.26	1	-3.10603
2016-02-09	110.75	2	-0.45944
2016-02-10	110.6	3	-0.135532
2016-02-11	109.35	4	-1.13663
2016-02-12	111.36	5	1.82144
2016-02-15	111.79	1	0.385391
2016-02-16	111.59	2	-0.179067
2016-02-17	110.98	3	-0.548144
2016-02-18	110.44	4	-0.487762
2016-02-19	110.85	5	0.370555
2016-02-22	113.11	1	2.01829
2016-02-23	112.41	2	-0.62079
2016-02-24	110.49	3	-1.72279
2016-02-25	109.99	4	-0.453557
2016-02-26	109.51	5	-0.437358
2016-02-29	110.07	1	0.510066
2016-03-01	109.37	2	-0.63799
2016-03-02	110.06	3	0.628904
2016-03-03	111.64	4	1.42537
2016-03-04	113.55	5	1.69639
2016-03-07	113.52	1	-0.0264236
2016-03-08	114.38	2	0.754721
2016-03-09	114.8	3	0.366525
2016-03-10	114.4	4	-0.34904
2016-03-11	116.78	5	2.05907
2016-03-14	118.65	1	1.58862
2016-03-15	117.58	2	-0.905903
2016-03-16	119.5	3	1.61974
2016-03-17	122.77	4	2.69963
2016-03-18	123.57	5	0.649511
2016-03-21	122.61	1	-0.779921
2016-03-22	124.95	2	1.89051
2016-03-23	122.95	3	-1.61359
2016-03-24	120.42	4	-2.07921
2016-03-25	120.42	5	0
2016-03-28	120.93	1	0.422623
2016-03-29	119.75	2	-0.980563
2016-03-30	120.18	3	0.358438
2016-03-31	119.93	4	-0.208238
2016-04-01	119.76	5	-0.14185
2016-04-04	116.95	1	-2.37432
2016-04-05	115.23	2	-1.48164
2016-04-06	116.04	3	0.700483
2016-04-07	117.01	4	0.832444
2016-04-08	116	5	-0.866921
2016-04-11	117.77	1	1.51434
2016-04-12	119.16	2	1.17336
2016-04-13	117.14	3	-1.70973
2016-04-14	118	4	0.731482
2016-04-15	117.82	5	-0.152659
2016-04-18	119.5	1	1.41583
2016-04-19	120.53	2	0.858231
2016-04-20	120.99	3	0.380921
2016-04-21	118.72	4	-1.89401
2016-04-22	117.74	5	-0.828898
2016-04-25	117.94	1	0.169722
2016-04-26	119.6	2	1.39768
2016-04-27	116.89	3	-2.29195
2016-04-28	116.56	4	-0.282716
2016-04-29	117.21	5	0.556104
2016-05-02	116.17	1	-0.891256
2016-05-03	115.68	2	-0.422688
2016-05-04	115.86	3	0.155481
2016-05-05	117.23	4	1.17553
2016-05-06	119.69	5	2.07672
2016-05-09	120.78	1	0.906564
2016-05-10	122.73	2	1.60161
2016-05-11	123.33	3	0.487687
2016-05-12	123.65	4	0.25913
2016-05-13	123.69	5	0.0323441
2016-05-16	126.47	1	2.22267
2016-05-17	124.8	2	-1.32927
2016-05-18	123.28	3	-1.22543
2016-05-19	119.11	4	-3.44108
2016-05-20	119.74	5	0.527529
2016-05-23	118.49	1	-1.04942
2016-05-24	118.18	2	-0.261968
2016-05-25	117.74	3	-0.373008
2016-05-26	117.97	4	0.195155
2016-05-27	117.66	5	-0.263125
2016-05-30	117.72	1	0.0509814
2016-05-31	118.14	2	0.356144
2016-06-01	118.53	3	0.329573
2016-06-02	118.98	4	0.378932
2016-06-03	121.74	5	2.29322
2016-06-06	124.86	1	2.53055
2016-06-07	125.55	2	0.551098
2016-06-08	130.2	3	3.63676
2016-06-09	127.17	4	-2.3547
2016-06-10	127.65	5	0.376737
2016-06-13	127.68	1	0.023499
2016-06-14	125.98	2	-1.3404
2016-06-15	127.56	3	1.24637
2016-06-16	128.23	4	0.523868
2016-06-17	129.64	5	1.09359
2016-06-20	129.47	1	-0.131218
2016-06-21	129.21	2	-0.201021
2016-06-22	128.39	3	-0.636648
2016-06-23	130.16	4	1.3692
2016-06-24	126.3	5	-3.01044
2016-06-27	125.36	1	-0.747043
2016-06-28	128.98	2	2.84678
2016-06-29	131.49	3	1.92734
2016-06-30	132.04	4	0.41741
2016-07-01	132.99	5	0.716903
2016-07-04	133.6	1	0.457632
2016-07-05	132.58	2	-0.766402
2016-07-06	131.04	3	-1.16836
2016-07-07	130.5	4	-0.412939
2016-07-08	132.18	5	1.27914
2016-07-11	135.83	1	2.72395
2016-07-12	134.24	2	-1.17749
2016-07-13	134.36	3	0.0893522
2016-07-14	137.36	4	2.20825
2016-07-15	135.12	5	-1.64419
2016-07-18	134.8	1	-0.237107
2016-07-19	134.14	2	-0.490817
2016-07-20	134.78	3	0.475979
2016-07-21	134.24	4	-0.401458
2016-07-22	130.97	5	-2.4661
2016-07-25	129.4	1	-1.20599
2016-07-26	130.4	2	0.769827
2016-07-27	129.97	3	-0.330299
2016-07-28	130.57	4	0.460583
2016-07-29	133.52	5	2.23418
2016-08-01	132.22	1	-0.978408
2016-08-02	131.83	2	-0.295399
2016-08-03	131.56	3	-0.205019
2016-08-04	131.92	4	0.273266
2016-08-05	132.62	5	0.529222
2016-08-08	131.77	1	-0.642992
2016-08-09	131.71	2	-0.0455443
2016-08-10	130.43	3	-0.976585
2016-08-11	129.69	4	-0.56897
2016-08-12	129.03	5	-0.510205
2016-08-15	129.24	1	0.162621
2016-08-16	128.82	2	-0.325506
2016-08-17	127.06	3	-1.37567
2016-08-18	129.42	4	1.84035
2016-08-19	129.49	5	0.0540728
2016-08-22	132.66	1	2.41858
2016-08-23	133.18	2	0.391213
2016-08-24	130.98	3	-1.6657
2016-08-25	130.64	4	-0.259919
2016-08-26	131.57	5	0.709358
2016-08-29	132.03	1	0.349014
2016-08-30	131.99	2	-0.0303007
2016-08-31	133.03	3	0.78485
2016-09-01	135.56	4	1.88397
2016-09-02	136.58	5	0.749618
2016-09-05	136.64	1	0.0439207
2016-09-06	138.08	2	1.04835
2016-09-07	139.29	3	0.872486
2016-09-08	139.51	4	0.157819
2016-09-09	137.08	5	-1.75716
2016-09-12	137.11	1	0.0218826
2016-09-13	136.25	2	-0.629209
2016-09-14	136.04	3	-0.154247
2016-09-15	135.89	4	-0.110323
2016-09-16	135.6	5	-0.213636
2016-09-19	138.4	1	2.04387
2016-09-20	140.43	2	1.45611
2016-09-21	141.69	3	0.893243
2016-09-22	141.67	4	-0.0141163
2016-09-23	138.49	5	-2.27023
2016-09-26	139.06	1	0.410737
2016-09-27	139.72	2	0.473493
2016-09-28	139.44	3	-0.200602
2016-09-29	138.6	4	-0.604231
2016-09-30	138.69	5	0.064914
2016-10-03	136.17	1	-1.83371
2016-10-04	136.05	2	-0.088164
2016-10-05	137.28	3	0.900017
2016-10-06	136.05	4	-0.900017
2016-10-07	137.24	5	0.870875
2016-10-10	140.31	1	2.2123
2016-10-11	139.23	2	-0.772702
2016-10-12	139.9	3	0.480064
2016-10-13	140.59	4	0.491997
2016-10-14	142.07	5	1.0472
2016-10-17	143.43	1	0.952722
2016-10-18	145.27	2	1.2747
2016-10-19	144.5	3	-0.531457
2016-10-20	143.26	4	-0.861835
2016-10-21	143.99	5	0.508269
2016-10-24	144.9	1	0.63
2016-10-25	148.73	2	2.60887
2016-10-26	148.77	3	0.0268908
2016-10-27	149.33	4	0.375713
2016-10-28	150	5	0.447667
2016-10-31	149.27	1	-0.487855
2016-11-01	147.29	2	-1.33533
2016-11-02	148.14	3	0.575434
2016-11-03	149.61	4	0.987414
2016-11-04	153.41	5	2.50822
2016-11-07	155.52	1	1.36603
2016-11-08	149.89	2	-3.68726
2016-11-09	151.56	3	1.10799
2016-11-10	146.46	4	-3.42292
2016-11-11	145.08	5	-0.946704
2016-11-14	146.3	1	0.837399
2016-11-15	147.42	2	0.762635
2016-11-16	147.14	3	-0.190114
2016-11-17	146.79	4	-0.238152
2016-11-18	145.8	5	-0.676717
2016-11-21	144.93	1	-0.598495
2016-11-22	144.55	2	-0.26254
2016-11-23	141.28	3	-2.28817
2016-11-24	140.86	4	-0.297725
2016-11-25	139.41	5	-1.03473
2016-11-28	141.11	1	1.21205
2016-11-29	138.55	2	-1.83085
2016-11-30	137.01	3	-1.11774
2016-12-01	132.88	4	-3.06075
2016-12-02	133.76	5	0.660068
2016-12-05	133.54	1	-0.164609
2016-12-06	132.18	2	-1.02364
2016-12-07	131.55	3	-0.477762
2016-12-08	130.99	4	-0.426602
2016-12-09	129.64	5	-1.03596
2016-12-12	130.94	1	0.997782
2016-12-13	132.33	2	1.05596
2016-12-14	133.31	3	0.737844
2016-12-15	132.52	4	-0.594367
2016-12-16	132.61	5	0.0678912
2016-12-19	134.8	1	1.63797
2016-12-20	134.67	2	-0.0964857
2016-12-21	135.04	3	0.274369
2016-12-22	131.17	4	-2.90768
2016-12-23	129.87	5	-0.996024
2016-12-26	129.32	1	-0.4244
2016-12-27	128.15	2	-0.90885
2016-12-28	127.62	3	-0.414435
2016-12-29	129.6	4	1.53957
2016-12-30	130.92	5	1.01337
2017-01-02	131.36	1	0.33552
2017-01-03	130.72	2	-0.488401
2017-01-04	134.32	3	2.71674
2017-01-05	135.43	4	0.822989
2017-01-06	134.8	5	-0.46627
2017-01-09	135.43	1	0.46627
2017-01-10	137.87	2	1.78563
2017-01-11	139.41	3	1.1108
2017-01-12	139.62	4	0.150521
2017-01-13	139.45	5	-0.121833
2017-01-16	139.81	1	0.257824
2017-01-17	140.71	2	0.641668
2017-01-18	140.44	3	-0.192068
2017-01-19	141.28	4	0.596339
2017-01-20	142.88	5	1.12614
2017-01-23	144.54	1	1.15512
2017-01-24	142.36	2	-1.51972
2017-01-25	143	3	0.448557
2017-01-26	141.49	4	-1.06156
2017-01-27	142.66	5	0.823513
2017-01-30	141.79	1	-0.611709
2017-01-31	140.07	2	-1.22048
2017-02-01	142.09	3	1.43184
2017-02-02	138.82	4	-2.32825
2017-02-03	138.84	5	0.0144061
2017-02-06	137.4	1	-1.04258
2017-02-07	136.28	2	-0.818479
2017-02-08	135.74	3	-0.39703
2017-02-09	137.41	4	1.22279
2017-02-10	137.75	5	0.247129
2017-02-13	136.87	1	-0.640888
2017-02-14	136.02	2	-0.622964
2017-02-15	136.98	3	0.7033
2017-02-16	138.34	4	0.987949
2017-02-17	138.99	5	0.468756
2017-02-20	139.17	1	0.129422
2017-02-21	140.49	2	0.94401
2017-02-22	139.6	3	-0.635512
2017-02-23	139.29	4	-0.22231
2017-02-24	136.1	5	-2.31682
2017-02-27	133.02	1	-2.28904
2017-02-28	134.33	2	0.979997
2017-03-01	135.24	3	0.675152
2017-03-02	136.68	4	1.05914
2017-03-03	135.61	5	-0.785931
2017-03-06	134.03	1	-1.17195
2017-03-07	133.43	2	-0.448666
2017-03-08	134.3	3	0.649911
2017-03-09	133.38	4	-0.687391
2017-03-10	133.75	5	0.277019
2017-03-13	133.98	1	0.171815
2017-03-14	133.78	2	-0.149388
2017-03-15	133.69	3	-0.0672973
2017-03-16	134.17	4	0.358397
2017-03-17	134.29	5	0.0893988
2017-03-20	136.39	1	1.55168
2017-03-21	135.55	2	-0.617785
2017-03-22	134.57	3	-0.725607
2017-03-23	133.75	4	-0.611212
2017-03-24	131.22	5	-1.90971
2017-03-27	132.93	1	1.29474
2017-03-28	132.67	2	-0.195783
2017-03-29	133.07	3	0.301046
2017-03-30	133.5	4	0.322617
2017-03-31	133.58	5	0.0599071
2017-04-03	132.92	1	-0.495311
2017-04-04	132.75	2	-0.127978
2017-04-05	132.63	3	-0.0904364
2017-04-06	132.92	4	0.218415
2017-04-07	134.44	5	1.13706
2017-04-10	134.65	1	0.156082
2017-04-11	134.72	2	0.0519731
2017-04-12	133.98	3	-0.550802
2017-04-13	133.92	4	-0.0447928
2017-04-14	133.92	5	0
2017-04-17	134.76	1	0.625281
2017-04-18	135.74	2	0.724587
2017-04-19	132.76	3	-2.21983
2017-04-20	128.75	4	-3.06704
2017-04-21	125	5	-2.95588
2017-04-24	124.09	1	-0.730663
2017-04-25	124.01	2	-0.0644901
2017-04-26	123.39	3	-0.501214
2017-04-27	122.25	4	-0.928194
2017-04-28	123.71	5	1.1872
2017-05-01	125.05	1	1.07735
2017-05-02	126.52	2	1.16867
2017-05-03	127.74	3	0.959655
2017-05-04	125.8	4	-1.53036
2017-05-05	126.51	5	0.562801
2017-05-08	128.66	1	1.68519
2017-05-09	127.05	2	-1.25926
2017-05-10	127.6	3	0.431966
2017-05-11	125.83	4	-1.39686
2017-05-12	126.35	5	0.412404
2017-05-15	125.39	1	-0.762695
2017-05-16	124.03	2	-1.09054
2017-05-17	126.46	3	1.94026
2017-05-18	123.48	4	-2.38469
2017-05-19	125.38	5	1.52699
2017-05-22	123.16	1	-1.78648
2017-05-23	123.47	2	0.251389
2017-05-24	122.23	3	-1.00937
2017-05-25	123.02	4	0.644243
2017-05-26	125.27	5	1.81245
2017-05-29	125.03	1	-0.19177
2017-05-30	126.11	2	0.860083
2017-05-31	124.02	3	-1.67117
2017-06-01	123.27	4	-0.606577
2017-06-02	122.63	5	-0.520538
2017-06-05	124.55	1	1.55355
2017-06-06	122.29	2	-1.8312
2017-06-07	122.11	3	-0.1473
2017-06-08	122.26	4	0.122765
2017-06-09	122.82	5	0.456994
2017-06-12	124.02	1	0.972297
2017-06-13	123.27	2	-0.606577
2017-06-14	123.25	3	-0.0162259
2017-06-15	124.1	4	0.687288
2017-06-16	123.14	5	-0.776577
2017-06-19	123.05	1	-0.0731143
2017-06-20	121.3	2	-1.4324
2017-06-21	120.07	3	-1.01919
2017-06-22	116.51	4	-3.00978
2017-06-23	120.86	5	3.66557
2017-06-26	121.72	1	0.709047
2017-06-27	122.15	2	0.352647
2017-06-28	121.63	3	-0.426615
2017-06-29	123.66	4	1.65522
2017-06-30	123.83	5	0.137379
2017-07-03	124.86	1	0.828345
2017-07-04	124.46	2	-0.320873
2017-07-05	126.13	3	1.33287
2017-07-06	125.51	4	-0.492768
2017-07-07	124.82	5	-0.551274
2017-07-10	124.23	1	-0.473801
2017-07-11	122.71	2	-1.23108
2017-07-12	123.66	3	0.771202
2017-07-13	126.46	4	2.23902
2017-07-14	127.84	5	1.08534
2017-07-17	127.83	1	-0.00782258
2017-07-18	128.68	2	0.662745
2017-07-19	128.95	3	0.209603
2017-07-20	129.17	4	0.170463
2017-07-21	130.58	5	1.08567
2017-07-24	128.57	1	-1.55126
2017-07-25	127.26	2	-1.02413
2017-07-26	129.5	3	1.74486
2017-07-27	130.2	4	0.539085
2017-07-28	131.13	5	0.711747
2017-07-31	131.52	1	0.296973
2017-08-01	130.82	2	-0.53366
2017-08-02	133.23	3	1.82546
2017-08-03	133.11	4	-0.0901104
2017-08-04	133.05	5	-0.0450857
2017-08-07	134.72	1	1.24736
2017-08-08	135.23	2	0.377848
2017-08-09	134.65	3	-0.429821
2017-08-10	131.77	4	-2.16208
2017-08-11	132.88	5	0.838849
2017-08-14	130.49	1	-1.81499
2017-08-15	126.8	2	-2.86856
2017-08-16	126.35	3	-0.355521
2017-08-17	124.54	4	-1.44289
2017-08-18	125.26	5	0.576463
2017-08-21	124.82	1	-0.351888
2017-08-22	124.35	2	-0.377253
2017-08-23	123.63	3	-0.580694
2017-08-24	122.59	4	-0.844778
2017-08-25	125.34	5	2.21846
2017-08-28	125.34	1	0
2017-08-29	124.13	2	-0.970064
2017-08-30	122.9	3	-0.995839
2017-08-31	123.45	4	0.44652
2017-09-01	123.36	5	-0.0729306
2017-09-04	122.2	1	-0.944786
2017-09-05	121.02	2	-0.970323
2017-09-06	120.71	3	-0.256485
2017-09-07	121.36	4	0.537036
2017-09-08	122.42	5	0.869642
2017-09-11	122.96	1	0.440134
2017-09-12	124.98	2	1.62946
2017-09-13	127.34	3	1.8707
2017-09-14	127.26	4	-0.0628437
2017-09-15	128.93	5	1.30374
2017-09-18	128.95	1	0.0155111
2017-09-19	126.12	2	-2.21909
2017-09-20	128.01	3	1.48746
2017-09-21	126.89	4	-0.878782
2017-09-22	126.35	5	-0.426474
2017-09-25	124.9	1	-1.15424
2017-09-26	124.68	2	-0.176296
2017-09-27	122.17	3	-2.03369
2017-09-28	121.4	4	-0.632264
2017-09-29	121.57	5	0.139935
2017-10-02	120.48	1	-0.900646
2017-10-03	119.8	2	-0.566008
2017-10-04	119.58	3	-0.183808
2017-10-05	120.36	4	0.650165
2017-10-06	122.33	5	1.62351
2017-10-09	122.79	1	0.375327
2017-10-10	122.49	2	-0.244619
2017-10-11	119.85	3	-2.17884
2017-10-12	120.01	4	0.133411
2017-10-13	120.32	5	0.257979
2017-10-16	118.75	1	-1.31344
2017-10-17	118.79	2	0.0336785
2017-10-18	118.86	3	0.0589102
2017-10-19	120.82	4	1.63555
2017-10-20	119.79	5	-0.856162
2017-10-23	119.76	1	-0.025047
2017-10-24	118.78	2	-0.82167
2017-10-25	119.13	3	0.294229
2017-10-26	119.23	4	0.0839067
2017-10-27	120.44	5	1.00973
2017-10-30	119.5	1	-0.783533
2017-10-31	118.36	2	-0.958554
2017-11-01	116.42	3	-1.65265
2017-11-02	119.27	4	2.41855
2017-11-03	117.59	5	-1.41858
2017-11-06	118.41	1	0.694918
2017-11-07	117.36	2	-0.890704
2017-11-08	117.68	3	0.272294
2017-11-09	118.23	4	0.46628
2017-11-10	118.78	5	0.464116
2017-11-13	118.92	1	0.117796
2017-11-14	118.01	2	-0.768163
2017-11-15	118.38	3	0.313042
2017-11-16	118.37	4	-0.00844773
2017-11-17	116.42	5	-1.6611
2017-11-20	115.55	1	-0.750101
2017-11-21	116.02	2	0.405925
2017-11-22	115.42	3	-0.518494
2017-11-23	115.3	4	-0.104022
2017-11-24	115.92	5	0.536287
2017-11-27	115.55	1	-0.319696
2017-11-28	116.88	2	1.14444
2017-11-29	118.56	3	1.42714
2017-11-30	116.73	4	-1.55556
2017-12-01	117.3	5	0.487118
2017-12-04	116.92	1	-0.324482
2017-12-05	116.59	2	-0.282643
2017-12-06	115.65	3	-0.809512
2017-12-07	113.52	4	-1.85894
2017-12-08	113.63	5	0.0968523
2017-12-11	111.64	1	-1.76681
2017-12-12	110.48	2	-1.04449
2017-12-13	112.08	3	1.43784
2017-12-14	112.44	4	0.320684
2017-12-15	112.6	5	0.142197
2017-12-18	113.48	1	0.778489
2017-12-19	113.37	2	-0.0969804
2017-12-20	114.33	3	0.84322
2017-12-21	113.73	4	-0.526179
2017-12-22	112.67	5	-0.936403
2017-12-25	112.67	1	0
2017-12-26	113.67	2	0.883632
2017-12-27	114.96	3	1.12847
2017-12-28	115.03	4	0.0608722
2017-12-29	115.88	5	0.736221
2018-01-01	115.88	1	0
2018-01-02	118.83	2	2.51387
2018-01-03	117.93	3	-0.760267
2018-01-04	118.53	4	0.507486
2018-01-05	117.81	5	-0.609294
2018-01-08	115.25	1	-2.19695
2018-01-09	115.83	2	0.501992
2018-01-10	115.18	3	-0.562748
2018-01-11	114.31	4	-0.758207
2018-01-12	114.1	5	-0.18388
2018-01-15	114.14	1	0.0350508
2018-01-16	113.03	2	-0.977249
2018-01-17	115.41	3	2.08377
2018-01-18	114.67	4	-0.643257
2018-01-19	114.06	5	-0.533381
2018-01-22	115.09	1	0.898981
2018-01-23	113.86	2	-1.07448
2018-01-24	115.57	3	1.49068
2018-01-25	116.03	4	0.397237
2018-01-26	117.01	5	0.841062
2018-01-29	116.75	1	-0.22245
2018-01-30	114.78	2	-1.70176
2018-01-31	115.04	3	0.226264
2018-02-01	114.5	4	-0.470507
2018-02-02	113.94	5	-0.490283
2018-02-05	113.73	1	-0.184478
2018-02-06	115.29	2	1.36235
2018-02-07	115.8	3	0.441387
2018-02-08	115.69	4	-0.0950365
2018-02-09	115.35	5	-0.294322
2018-02-12	115	1	-0.303886
2018-02-13	115.78	2	0.675971
2018-02-14	116.07	3	0.250162
2018-02-15	115.47	4	-0.51827
2018-02-16	112.96	5	-2.1977
2018-02-19	112.45	1	-0.45251
2018-02-20	112.7	2	0.222074
2018-02-21	112.16	3	-0.4803
2018-02-22	113.06	4	0.799223
2018-02-23	113.21	5	0.132585
2018-02-26	113.94	1	0.642749
2018-02-27	113.3	2	-0.563283
2018-02-28	113.4	3	0.0882223
2018-03-01	115.23	4	1.60087
2018-03-02	114.2	5	-0.897883
2018-03-05	113.54	1	-0.57961
2018-03-06	114.01	2	0.413097
2018-03-07	114.08	3	0.0613793
2018-03-08	113.47	4	-0.536147
2018-03-09	113.71	5	0.211286
2018-03-12	113.22	1	-0.431852
2018-03-13	114.17	2	0.835574
2018-03-14	113.68	3	-0.430108
2018-03-15	112.01	4	-1.47993
2018-03-16	111.79	5	-0.196604
2018-03-19	112.68	1	0.792983
2018-03-20	112.95	2	0.23933
2018-03-21	112.75	3	-0.177226
2018-03-22	112.47	4	-0.248646
2018-03-23	110.73	5	-1.55917
2018-03-26	111.07	1	0.306583
2018-03-27	112.62	2	1.38587
2018-03-28	112.03	3	-0.525263
2018-03-29	112.03	4	0
2018-03-30	112.03	5	0
2018-04-02	111.62	1	-0.366645
2018-04-03	112.62	2	0.891907
2018-04-04	113.03	3	0.363395
2018-04-05	113.2	4	0.15029
2018-04-06	113.08	5	-0.106063
2018-04-09	113.28	1	0.17671
2018-04-10	112.34	2	-0.833264
2018-04-11	112.75	3	0.364299
2018-04-12	112.49	4	-0.230865
2018-04-13	112.43	5	-0.0533523
2018-04-16	110.49	1	-1.74058
2018-04-17	110.57	2	0.0723785
2018-04-18	111.64	3	0.96306
2018-04-19	110.99	4	-0.58393
2018-04-20	111.77	5	0.700308
2018-04-23	112.67	1	0.802
2018-04-24	113.71	2	0.918816
2018-04-25	112.54	3	-1.03426
2018-04-26	113.22	4	0.602411
2018-04-27	114.66	5	1.26384
2018-04-30	114.73	1	0.0610314
2018-05-01	116.88	2	1.85662
2018-05-02	116.17	3	-0.609313
2018-05-03	116.87	4	0.600757
2018-05-04	115.45	5	-1.22247
2018-05-07	114.24	1	-1.0536
2018-05-08	113.26	2	-0.861544
2018-05-09	112.36	3	-0.797806
2018-05-10	112.65	4	0.257766
2018-05-11	111.34	5	-1.16971
2018-05-14	111.31	1	-0.0269481
2018-05-15	110.61	2	-0.63086
2018-05-16	110.98	3	0.33395
2018-05-17	111.53	4	0.494361
2018-05-18	111.69	5	0.143356
2018-05-21	113.83	1	1.89789
2018-05-22	114.22	2	0.342031
2018-05-23	112.7	3	-1.3397
2018-05-24	113.38	4	0.601559
2018-05-25	113.14	5	-0.211902
2018-05-28	113.42	1	0.247175
2018-05-29	112.9	2	-0.459527
2018-05-30	112.94	3	0.0354233
2018-05-31	114.9	4	1.72055
2018-06-01	114.4	5	-0.436111
2018-06-04	114.09	1	-0.271347
2018-06-05	112.7	2	-1.22582
2018-06-06	112.08	3	-0.551652
2018-06-07	110.41	4	-1.50122
2018-06-08	110.61	5	0.180979
2018-06-11	110.64	1	0.0271186
2018-06-12	110.72	2	0.0722805
2018-06-13	109.74	3	-0.889056
2018-06-14	109.53	4	-0.191545
2018-06-15	109.36	5	-0.155329
2018-06-18	109.46	1	0.0913993
2018-06-19	108.98	2	-0.439481
2018-06-20	109.4	3	0.384651
2018-06-21	109.18	4	-0.201299
2018-06-22	109.72	5	0.493377
2018-06-25	109.65	1	-0.0638191
2018-06-26	110.17	2	0.473115
2018-06-27	110.33	3	0.145125
2018-06-28	109.3	4	-0.937948
2018-06-29	108.68	5	-0.568861
2018-07-02	106.78	1	-1.76371
2018-07-03	107.23	2	0.420542
2018-07-04	107.12	3	-0.102636
2018-07-05	105.44	4	-1.58076
2018-07-06	107.94	5	2.34334
2018-07-09	109.26	1	1.21548
2018-07-10	109.46	2	0.182882
2018-07-11	107.41	3	-1.89059
2018-07-12	107.26	4	-0.139749
2018-07-13	106.31	5	-0.889644
2018-07-16	106.55	1	0.2255
2018-07-17	105.72	2	-0.782027
2018-07-18	104.98	3	-0.702423
2018-07-19	105.99	4	0.957489
2018-07-20	107.61	5	1.51688
2018-07-23	108.5	1	0.823659
2018-07-24	108.22	2	-0.258398
2018-07-25	108	3	-0.203497
2018-07-26	106.92	4	-1.00503
2018-07-27	107.06	5	0.130853
2018-07-30	107.9	1	0.781545
2018-07-31	106.66	2	-1.15587
2018-08-01	105.59	3	-1.00825
2018-08-02	104.8	4	-0.75099
2018-08-03	105.71	5	0.864572
2018-08-06	106.65	1	0.885295
2018-08-07	106.65	2	0
2018-08-08	105.67	3	-0.923141
2018-08-09	105.61	4	-0.0567967
2018-08-10	105.22	5	-0.369967
2018-08-13	104.65	1	-0.543195
2018-08-14	104.28	2	-0.354186
2018-08-15	102.36	3	-1.85836
2018-08-16	101.99	4	-0.362124
2018-08-17	100.89	5	-1.0844
2018-08-20	99.04	1	-1.8507
2018-08-21	99.26	2	0.221886
2018-08-22	98.73	3	-0.535382
2018-08-23	98.88	4	0.151814
2018-08-24	100.78	5	1.90329
2018-08-27	101.31	1	0.52452
2018-08-28	99.66	2	-1.64207
2018-08-29	99.95	3	0.290567
2018-08-30	99.04	4	-0.914625
[truncated: 931 more rows]

## Sheet: Corn
2010-12-31	5.9
2011-01-03	5.97	1	1.17946
2011-01-04	5.85	2	-2.03053
2011-01-05	5.95	3	1.69496
2011-01-06	5.77	4	-3.07191
2011-01-07	5.71	5	-1.04531
2011-01-10	5.83	1	2.0798
2011-01-11	5.83	2	0
2011-01-12	6.06	3	3.86928
2011-01-13	6.18	4	1.96085
2011-01-14	6.24	5	0.966191
2011-01-17	6.24	1	0
2011-01-18	6.33	2	1.43201
2011-01-19	6.13	3	-3.21055
2011-01-20	6.25	4	1.93867
2011-01-21	6.29	5	0.637961
2011-01-24	6.27	1	-0.318472
2011-01-25	6.16	2	-1.76996
2011-01-26	6.31	3	2.40589
2011-01-27	6.25	4	-0.955421
2011-01-28	6.18	5	-1.12632
2011-01-31	6.34	1	2.55605
2011-02-01	6.34	2	0
2011-02-02	6.34	3	0
2011-02-03	6.36	4	0.314961
2011-02-04	6.54	5	2.79088
2011-02-07	6.5	1	-0.613499
2011-02-08	6.52	2	0.30722
2011-02-09	6.73	3	3.17008
2011-02-10	6.74	4	0.148478
2011-02-11	6.82	5	1.17995
2011-02-14	6.73	1	-1.32843
2011-02-15	6.65	2	-1.19583
2011-02-16	6.68	3	0.450113
2011-02-17	6.89	4	3.09531
2011-02-18	6.86	5	-0.436364
2011-02-21	6.86	1	0
2011-02-22	6.52	2	-5.08331
2011-02-23	6.66	3	2.12451
2011-02-24	6.63	4	-0.451468
2011-02-25	6.63	5	0
2011-02-28	7.05	1	6.14228
2011-03-01	7.04	2	-0.141945
2011-03-02	6.94	3	-1.43064
2011-03-03	6.94	4	0
2011-03-04	6.97	5	0.431345
2011-03-07	6.88	1	-1.29966
2011-03-08	6.75	2	-1.90761
2011-03-09	6.71	3	-0.594355
2011-03-10	6.53	4	-2.7192
2011-03-11	6.34	5	-2.95282
2011-03-14	6.36	1	0.314961
2011-03-15	6	2	-5.82689
2011-03-16	5.86	3	-2.36099
2011-03-17	6.18	4	5.31687
2011-03-18	6.54	5	5.66189
2011-03-21	6.57	1	0.457667
2011-03-22	6.6	2	0.455582
2011-03-23	6.55	3	-0.76046
2011-03-24	6.77	4	3.3036
2011-03-25	6.65	5	-1.78842
2011-03-28	6.48	1	-2.58963
2011-03-29	6.5	2	0.308167
2011-03-30	6.41	3	-1.39429
2011-03-31	6.73	4	4.87159
2011-04-01	7.14	5	5.91376
2011-04-04	7.38	1	3.30609
2011-04-05	7.46	2	1.07818
2011-04-06	7.42	3	-0.537636
2011-04-07	7.38	4	-0.540542
2011-04-08	7.47	5	1.21214
2011-04-11	7.56	1	1.19762
2011-04-12	7.36	2	-2.68113
2011-04-13	7.35	3	-0.135962
2011-04-14	7.32	4	-0.408999
2011-04-15	7.21	5	-1.51414
2011-04-18	7.33	1	1.65066
2011-04-19	7.29	2	-0.547197
2011-04-20	7.15	3	-1.93912
2011-04-21	7.17	4	0.27933
2011-04-22	7.17	5	0
2011-04-25	7.44	1	3.69652
2011-04-26	7.47	2	0.402415
2011-04-27	7.33	3	-1.89195
2011-04-28	7.05	4	-3.89479
2011-04-29	7.35	5	4.16727
2011-05-02	7.11	1	-3.31981
2011-05-03	7.01	2	-1.41645
2011-05-04	7.07	3	0.852278
2011-05-05	6.86	4	-3.0153
2011-05-06	6.63	5	-3.41026
2011-05-09	6.86	1	3.41026
2011-05-10	6.86	2	0
2011-05-11	6.6	3	-3.86378
2011-05-12	6.64	4	0.604231
2011-05-13	6.66	5	0.300752
2011-05-16	6.81	1	2.22726
2011-05-17	7.05	2	3.46355
2011-05-18	7.35	3	4.16727
2011-05-19	7.37	4	0.271739
2011-05-20	7.48	5	1.48151
2011-05-23	7.43	1	-0.670693
2011-05-24	7.22	2	-2.86709
2011-05-25	7.34	3	1.64839
2011-05-26	7.38	4	0.54348
2011-05-27	7.51	5	1.74618
2011-05-30	7.51	1	0
2011-05-31	7.41	2	-1.3405
2011-06-01	7.53	3	1.60646
2011-06-02	7.6	4	0.925321
2011-06-03	7.48	5	-1.59155
2011-06-06	7.25	1	-3.12313
2011-06-07	7.3	2	0.687288
2011-06-08	7.58	3	3.76389
2011-06-09	7.78	4	2.60431
2011-06-10	7.81	5	0.384863
2011-06-13	7.77	1	-0.51348
2011-06-14	7.49	2	-3.67014
2011-06-15	7.2	3	-3.94878
2011-06-16	6.97	4	-3.24658
2011-06-17	6.97	5	0
2011-06-20	6.98	1	0.143369
2011-06-21	7.06	2	1.13961
2011-06-22	6.75	3	-4.49025
2011-06-23	6.78	4	0.44346
2011-06-24	6.68	5	-1.48591
2011-06-27	6.89	1	3.09531
2011-06-28	6.81	2	-1.1679
2011-06-29	6.69	3	-1.77782
2011-06-30	6.61	4	-1.20302
2011-07-01	6.25	5	-5.60022
2011-07-04	6.25	1	0
2011-07-05	6.44	2	2.99471
2011-07-06	6.42	3	-0.311042
2011-07-07	6.48	4	0.930239
2011-07-08	6.66	5	2.7399
2011-07-11	6.67	1	0.150038
2011-07-12	6.69	2	0.299401
2011-07-13	7.13	3	6.36974
2011-07-14	7.17	4	0.559442
2011-07-15	7.29	5	1.65979
2011-07-18	7.25	1	-0.550208
2011-07-19	7.31	2	0.82418
2011-07-20	7.16	3	-2.07333
2011-07-21	7.17	4	0.139567
2011-07-22	7.24	5	0.971555
2011-07-25	7.13	1	-1.531
2011-07-26	7.24	2	1.531
2011-07-27	7.22	3	-0.276625
2011-07-28	7.11	4	-1.53527
2011-07-29	6.95	5	-2.27606
2011-08-01	7.06	1	1.57034
2011-08-02	7.33	2	3.75305
2011-08-03	7.28	3	-0.684465
2011-08-04	7.2	4	-1.10498
2011-08-05	7.17	5	-0.417537
2011-08-08	6.94	1	-3.26039
2011-08-09	7.01	2	1.00359
2011-08-10	7.02	3	0.142552
2011-08-11	7.21	4	2.67057
2011-08-12	7.2	5	-0.138793
2011-08-15	7.24	1	0.554018
2011-08-16	7.29	2	0.688234
2011-08-17	7.3	3	0.13708
2011-08-18	7.22	4	-1.10194
2011-08-19	7.24	5	0.276625
2011-08-22	7.35	1	1.50791
2011-08-23	7.45	2	1.35137
2011-08-24	7.42	3	-0.403498
2011-08-25	7.42	4	0
2011-08-26	7.63	5	2.79088
2011-08-29	7.63	1	0
2011-08-30	7.65	2	0.26178
2011-08-31	7.58	3	-0.919245
2011-09-01	7.26	4	-4.31334
2011-09-02	7.45	5	2.58342
2011-09-05	7.45	1	0
2011-09-06	7.4	2	-0.673403
2011-09-07	7.34	3	-0.814116
2011-09-08	7.19	4	-2.06477
2011-09-09	7.2	5	0.138985
2011-09-12	7.3	1	1.37933
2011-09-13	7.07	2	-3.20139
2011-09-14	7.08	3	0.141343
2011-09-15	6.84	4	-3.44862
2011-09-16	6.74	5	-1.47278
2011-09-19	6.67	1	-1.04401
2011-09-20	6.67	2	0
2011-09-21	6.66	3	-0.150038
2011-09-22	6.32	4	-5.24003
2011-09-23	6.2	5	-1.91699
2011-09-26	6.28	1	1.28207
2011-09-27	6.34	2	0.950879
2011-09-28	6.13	3	-3.3684
2011-09-29	6.17	4	0.650409
2011-09-30	5.75	5	-7.0499
2011-10-03	5.75	1	0
2011-10-04	5.74	2	-0.174064
2011-10-05	5.91	3	2.91866
2011-10-06	5.94	4	0.50633
2011-10-07	5.9	5	-0.675678
2011-10-10	5.95	1	0.843887
2011-10-11	6.34	2	6.34875
2011-10-12	6.3	3	-0.632914
2011-10-13	6.28	4	-0.317965
2011-10-14	6.31	5	0.47657
2011-10-17	6.32	1	0.158353
2011-10-18	6.36	2	0.630917
2011-10-19	6.61	3	3.85553
2011-10-20	6.42	4	-2.91655
2011-10-21	6.49	5	1.08444
2011-10-24	6.45	1	-0.61824
2011-10-25	6.44	2	-0.155159
2011-10-26	6.3	3	-2.19789
2011-10-27	6.45	4	2.35305
2011-10-28	6.49	5	0.61824
2011-10-31	6.41	1	-1.24033
2011-11-01	6.45	2	0.622086
2011-11-02	6.39	3	-0.934586
2011-11-03	6.48	4	1.39862
2011-11-04	6.5	5	0.308167
2011-11-07	6.48	1	-0.308167
2011-11-08	6.58	2	1.53142
2011-11-09	6.54	3	-0.609758
2011-11-10	6.54	4	0
2011-11-11	6.37	5	-2.63377
2011-11-14	6.33	1	-0.629923
2011-11-15	6.45	2	1.87799
2011-11-16	6.42	3	-0.466201
2011-11-17	6.14	4	-4.45934
2011-11-18	6.09	5	-0.817666
2011-11-21	5.95	1	-2.32569
2011-11-22	5.96	2	0.167926
2011-11-23	5.85	3	-1.86288
2011-11-24	5.85	4	0
2011-11-25	5.85	5	0
2011-11-28	5.86	1	0.170794
2011-11-29	5.93	2	1.18746
2011-11-30	5.96	3	0.504627
2011-12-01	5.91	4	-0.842465
2011-12-02	5.84	5	-1.1915
2011-12-05	5.79	1	-0.859851
2011-12-06	5.84	2	0.859851
2011-12-07	5.8	3	-0.687288
2011-12-08	5.9	4	1.70944
2011-12-09	5.84	5	-1.02216
2011-12-12	5.85	1	0.171086
2011-12-13	5.86	2	0.170794
2011-12-14	5.72	3	-2.41808
2011-12-15	5.79	4	1.21635
2011-12-16	5.75	5	-0.693244
2011-12-19	5.92	1	2.91366
2011-12-20	5.97	2	0.841048
2011-12-21	6.06	3	1.49629
2011-12-22	6.07	4	0.16488
2011-12-23	6.08	5	0.164609
2011-12-26	6.08	1	0
2011-12-27	6.23	2	2.43716
2011-12-28	6.36	3	2.0652
2011-12-29	6.28	4	-1.26584
2011-12-30	6.46	5	2.82593
2012-01-02	6.46	1	0
2012-01-03	6.48	2	0.309119
2012-01-04	6.48	3	0
2012-01-05	6.33	4	-2.34203
2012-01-06	6.33	5	0
2012-01-09	6.42	1	1.41179
2012-01-10	6.42	2	0
2012-01-11	6.42	3	0
2012-01-12	6.02	4	-6.43309
2012-01-13	5.9	5	-2.01349
2012-01-16	5.9	1	0
2012-01-17	5.94	2	0.675678
2012-01-18	5.86	3	-1.35595
2012-01-19	6.03	4	2.85974
2012-01-20	6.09	5	0.990107
2012-01-23	6.18	1	1.46702
2012-01-24	6.29	2	1.76428
2012-01-25	6.33	3	0.633917
2012-01-26	6.34	4	0.157853
2012-01-27	6.49	5	2.33838
2012-01-30	6.32	1	-2.65433
2012-01-31	6.4	2	1.25788
2012-02-01	6.41	3	0.156128
2012-02-02	6.42	4	0.155885
2012-02-03	6.43	5	0.155642
2012-02-06	6.44	1	0.1554
2012-02-07	6.42	2	-0.311042
2012-02-08	6.42	3	0
2012-02-09	6.67	4	3.82017
2012-02-10	6.32	5	-5.39007
2012-02-13	6.4	1	1.25788
2012-02-14	6.36	2	-0.626961
2012-02-15	6.27	3	-1.4252
2012-02-16	6.33	4	0.952388
2012-02-17	6.42	5	1.41179
2012-02-20	6.42	1	0
2012-02-21	6.31	2	-1.72824
2012-02-22	6.38	3	1.10324
2012-02-23	6.39	4	0.156617
2012-02-24	6.39	5	0
2012-02-27	6.48	1	1.39862
2012-02-28	6.57	2	1.37933
2012-02-29	6.58	3	0.152091
2012-03-01	6.53	4	-0.76278
2012-03-02	6.54	5	0.153022
2012-03-05	6.69	1	2.26767
2012-03-06	6.54	2	-2.26767
2012-03-07	6.39	3	-2.32029
2012-03-08	6.36	4	-0.470589
2012-03-09	6.45	5	1.40518
2012-03-12	6.59	1	2.14732
2012-03-13	6.61	2	0.303031
2012-03-14	6.59	3	-0.303031
2012-03-15	6.65	4	0.906351
2012-03-16	6.69	5	0.599702
2012-03-19	6.6	1	-1.35442
2012-03-20	6.44	2	-2.45411
2012-03-21	6.39	3	-0.779427
2012-03-22	6.42	4	0.468385
2012-03-23	6.44	5	0.311042
2012-03-26	6.35	1	-1.40737
2012-03-27	6.28	2	-1.10848
2012-03-28	6.17	3	-1.76711
2012-03-29	6.01	4	-2.62741
2012-03-30	6.43	5	6.75498
2012-04-02	6.55	1	1.84905
2012-04-03	6.57	2	0.304878
2012-04-04	6.56	3	-0.152323
2012-04-05	6.58	4	0.304414
2012-04-06	6.58	5	0
2012-04-09	6.5	1	-1.22326
2012-04-10	6.36	2	-2.17738
2012-04-11	6.38	3	0.313972
2012-04-12	6.38	4	0
2012-04-13	6.29	5	-1.4207
2012-04-16	6.25	1	-0.637961
2012-04-17	6.17	2	-1.28826
2012-04-18	6.03	3	-2.29518
2012-04-19	6.21	4	2.94139
2012-04-20	6.13	5	-1.29661
2012-04-23	6.24	1	1.77854
2012-04-24	6.19	2	-0.80451
2012-04-25	6.13	3	-0.974034
2012-04-26	6.22	4	1.45752
2012-04-27	6.43	5	3.32046
2012-04-30	6.52	1	1.38998
2012-05-01	6.47	2	-0.769827
2012-05-02	6.29	3	-2.8215
2012-05-03	6.36	4	1.10673
2012-05-04	6.46	5	1.56009
2012-05-07	6.46	1	0
2012-05-08	6.55	2	1.38357
2012-05-09	6.36	3	-2.94367
2012-05-10	6.16	4	-3.19516
2012-05-11	6.08	5	-1.30721
2012-05-14	6.1	1	0.328408
2012-05-15	6.23	2	2.10876
2012-05-16	6.48	3	3.93442
2012-05-17	6.54	4	0.921666
2012-05-18	6.64	5	1.51748
2012-05-21	6.61	1	-0.452831
2012-05-22	6.26	2	-5.44035
2012-05-23	6.29	3	0.478089
2012-05-24	6.05	4	-3.89028
2012-05-25	6.04	5	-0.165426
2012-05-28	6.04	1	0
2012-05-29	5.88	2	-2.68473
2012-05-30	5.85	3	-0.51151
2012-05-31	5.82	4	-0.51414
2012-06-01	5.79	5	-0.516797
2012-06-04	5.92	1	2.22042
2012-06-05	5.93	2	0.168776
2012-06-06	6.13	3	3.31705
2012-06-07	6.21	4	1.29661
2012-06-08	6.27	5	0.961546
2012-06-11	6.21	1	-0.961546
2012-06-12	6.14	2	-1.13362
2012-06-13	6.22	3	1.29452
2012-06-14	6.14	4	-1.29452
2012-06-15	6.17	5	0.48741
2012-06-18	6.39	1	3.50354
2012-06-19	6.52	2	2.01401
2012-06-20	6.46	3	-0.924506
2012-06-21	6.09	4	-5.89812
2012-06-22	6.15	5	0.9804
2012-06-25	6.54	1	6.14851
2012-06-26	6.66	2	1.81823
2012-06-27	6.69	3	0.449439
2012-06-28	6.67	4	-0.299401
2012-06-29	6.67	5	0
2012-07-02	6.92	1	3.67959
2012-07-03	7.13	2	2.98955
2012-07-04	7.13	3	0
2012-07-05	7.48	4	4.79216
2012-07-06	7.34	5	-1.88939
2012-07-09	7.7	1	4.78815
2012-07-10	7.52	2	-2.36542
2012-07-11	7.36	3	-2.15062
2012-07-12	7.62	4	3.47164
2012-07-13	7.68	5	0.784318
2012-07-16	8.03	1	4.4565
2012-07-17	8.04	2	0.124456
2012-07-18	8.18	3	1.72631
2012-07-19	8.29	4	1.33578
2012-07-20	8.39	5	1.19906
2012-07-23	8.31	1	-0.958091
2012-07-24	8.07	2	-2.93061
2012-07-25	8.11	3	0.494439
2012-07-26	7.95	4	-1.99259
2012-07-27	8.12	5	2.11582
2012-07-30	8.35	1	2.79314
2012-07-31	8.18	2	-2.05694
2012-08-01	8.13	3	-0.613123
2012-08-02	8.03	4	-1.23764
2012-08-03	8.15	5	1.48334
2012-08-06	8.08	1	-0.862605
2012-08-07	8.02	2	-0.745345
2012-08-08	8.17	3	1.85305
2012-08-09	8.24	4	0.853144
2012-08-10	8.06	5	-2.20868
2012-08-13	7.91	1	-1.87858
2012-08-14	7.91	2	0
2012-08-15	8.06	3	1.87858
2012-08-16	8.11	4	0.618431
2012-08-17	8.13	5	0.246306
2012-08-20	8.29	1	1.9489
2012-08-21	8.49	2	2.3839
2012-08-22	8.48	3	-0.117855
2012-08-23	8.27	4	-2.50759
2012-08-24	8.21	5	-0.728159
2012-08-27	8.12	1	-1.10228
2012-08-28	8.09	2	-0.370142
2012-08-29	8.27	3	2.20058
2012-08-30	8.18	4	-1.09424
2012-08-31	8.08	5	-1.23003
2012-09-03	8.08	1	0
2012-09-04	8.15	2	0.862605
2012-09-05	7.99	3	-1.98272
2012-09-06	8.03	4	0.499377
2012-09-07	8.07	5	0.496895
2012-09-10	7.9	1	-2.12907
2012-09-11	7.87	2	-0.38047
2012-09-12	7.78	3	-1.15017
2012-09-13	7.81	4	0.384863
2012-09-14	7.89	5	1.01912
2012-09-17	7.54	1	-4.5374
2012-09-18	7.46	2	-1.06668
2012-09-19	7.63	3	2.25324
2012-09-20	7.52	4	-1.45217
2012-09-21	7.52	5	0
2012-09-24	7.48	1	-0.533335
2012-09-25	7.47	2	-0.133779
2012-09-26	7.27	3	-2.71387
2012-09-27	7.18	4	-1.24569
2012-09-28	7.58	5	5.42138
2012-10-01	7.58	1	0
2012-10-02	7.58	2	0
2012-10-03	7.55	3	-0.396564
2012-10-04	7.55	4	0
2012-10-05	7.46	5	-1.19921
2012-10-08	7.36	1	-1.34955
2012-10-09	7.36	2	0
2012-10-10	7.31	3	-0.681666
2012-10-11	7.69	4	5.06775
2012-10-12	7.48	5	-2.7688
2012-10-15	7.33	1	-2.02573
2012-10-16	7.36	2	0.408442
2012-10-17	7.43	3	0.946593
2012-10-18	7.58	4	1.99873
2012-10-19	7.61	5	0.394997
2012-10-22	7.59	1	-0.263158
2012-10-23	7.55	2	-0.528403
2012-10-24	7.53	3	-0.265252
2012-10-25	7.4	4	-1.7415
2012-10-26	7.35	5	-0.677969
2012-10-29	7.35	1	0
2012-10-30	7.35	2	0
2012-10-31	7.54	3	2.55219
2012-11-01	7.51	4	-0.398672
2012-11-02	7.38	5	-1.74618
2012-11-05	7.35	1	-0.407333
2012-11-06	7.39	2	0.542742
2012-11-07	7.42	3	0.405132
2012-11-08	7.39	4	-0.405132
2012-11-09	7.38	5	-0.13541
2012-11-12	7.17	1	-2.8868
2012-11-13	7.22	2	0.69493
2012-11-14	7.24	3	0.276625
2012-11-15	7.2	4	-0.554018
2012-11-16	7.26	5	0.82988
2012-11-19	7.38	1	1.63938
2012-11-20	7.42	2	0.540542
2012-11-21	7.39	3	-0.405132
2012-11-22	7.39	4	0
2012-11-23	7.39	5	0
2012-11-26	7.45	1	0.80863
2012-11-27	7.61	2	2.12491
2012-11-28	7.61	3	0
2012-11-29	7.55	4	-0.791561
2012-11-30	7.49	5	-0.797877
2012-12-03	7.52	1	0.399734
2012-12-04	7.5	2	-0.266312
2012-12-05	7.57	3	0.929005
2012-12-06	7.52	4	-0.662693
2012-12-07	7.35	5	-2.28658
2012-12-10	7.3	1	-0.682597
2012-12-11	7.28	2	-0.274349
2012-12-12	7.24	3	-0.550966
2012-12-13	7.21	4	-0.415226
2012-12-14	7.31	5	1.37743
2012-12-17	7.25	1	-0.82418
2012-12-18	7.2	2	-0.692044
2012-12-19	7.03	3	-2.38943
2012-12-20	6.96	4	-1.00072
2012-12-21	7.02	5	0.858374
2012-12-24	7.02	1	0
2012-12-25	7.02	2	0
2012-12-26	6.93	3	-1.29034
2012-12-27	6.92	4	-0.144404
2012-12-28	6.94	5	0.2886
2012-12-31	6.94	1	0
2013-01-01	6.94	2	0
2013-01-02	6.92	3	-0.2886
2013-01-03	6.87	4	-0.725166
2013-01-04	6.82	5	-0.730463
2013-01-07	6.85	1	0.438918
2013-01-08	6.89	2	0.582243
2013-01-09	6.96	3	1.01084
2013-01-10	6.99	4	0.430108
2013-01-11	7.09	5	1.42048
2013-01-14	7.24	1	2.09359
2013-01-15	7.31	2	0.962207
2013-01-16	7.33	3	0.273224
2013-01-17	7.27	4	-0.821922
2013-01-18	7.3	5	0.411806
2013-01-21	7.3	1	0
2013-01-22	7.33	2	0.410117
2013-01-23	7.23	3	-1.37365
2013-01-24	7.28	4	0.689183
2013-01-25	7.25	5	-0.412939
2013-01-28	7.33	1	1.0974
2013-01-29	7.35	2	0.27248
2013-01-30	7.46	3	1.48551
2013-01-31	7.48	4	0.267738
2013-02-01	7.43	5	-0.670693
2013-02-04	7.42	1	-0.13468
2013-02-05	7.38	2	-0.540542
2013-02-06	7.32	3	-0.816331
2013-02-07	7.2	4	-1.65293
2013-02-08	7.19	5	-0.138985
2013-02-11	7.28	1	1.24397
2013-02-12	7.22	2	-0.827591
2013-02-13	7.2	3	-0.277393
2013-02-14	7.03	4	-2.38943
2013-02-15	7.06	5	0.425835
2013-02-18	7.06	1	0
2013-02-19	7.03	2	-0.425835
2013-02-20	7.1	3	0.990808
2013-02-21	7	4	-1.41846
2013-02-22	7	5	0
2013-02-25	7.04	1	0.569802
2013-02-26	7.13	2	1.27031
2013-02-27	7.13	3	0
2013-02-28	7.21	4	1.11577
2013-03-01	7.27	5	0.828734
2013-03-04	7.22	1	-0.690134
2013-03-05	7.26	2	0.552488
2013-03-06	7.06	3	-2.79348
2013-03-07	7.1	4	0.564973
2013-03-08	7.22	5	1.67602
2013-03-11	7.28	1	0.827591
2013-03-12	7.33	2	0.684465
2013-03-13	7.28	3	-0.684465
2013-03-14	7.34	4	0.820798
2013-03-15	7.33	5	-0.136333
2013-03-18	7.36	1	0.408442
2013-03-19	7.47	2	1.48351
2013-03-20	7.51	3	0.534047
2013-03-21	7.5	4	-0.133245
2013-03-22	7.4	5	-1.3423
2013-03-25	7.47	1	0.9415
2013-03-26	7.45	2	-0.268097
2013-03-27	7.49	3	0.535477
2013-03-28	7.09	4	-5.48835
2013-03-29	7.09	5	0
2013-04-01	6.57	1	-7.61715
2013-04-02	6.56	2	-0.152323
2013-04-03	6.56	3	0
2013-04-04	6.45	4	-1.69105
2013-04-05	6.44	5	-0.155159
2013-04-08	6.47	1	0.464757
2013-04-09	6.58	2	1.68586
2013-04-10	6.62	3	0.606062
2013-04-11	6.61	4	-0.151172
2013-04-12	6.67	5	0.903621
2013-04-15	6.56	1	-1.66293
2013-04-16	6.71	2	2.26083
2013-04-17	6.68	3	-0.448096
2013-04-18	6.5	4	-2.73158
2013-04-19	6.55	5	0.766287
2013-04-22	6.49	1	-0.920252
2013-04-23	6.41	2	-1.24033
2013-04-24	6.43	3	0.311527
2013-04-25	6.49	4	0.928799
2013-04-26	6.47	5	-0.308642
2013-04-29	6.85	1	5.70725
2013-04-30	6.75	2	-1.47061
2013-05-01	6.73	3	-0.296736
2013-05-02	6.88	4	2.20435
2013-05-03	6.88	5	0
2013-05-06	6.64	1	-3.55067
2013-05-07	6.69	2	0.750191
2013-05-08	6.62	3	-1.05185
2013-05-09	6.79	4	2.53556
2013-05-10	6.65	5	-2.08341
2013-05-13	6.84	1	2.81709
2013-05-14	6.84	2	0
2013-05-15	6.83	3	-0.146306
2013-05-16	6.73	4	-1.47495
2013-05-17	6.85	5	1.76735
2013-05-20	6.83	1	-0.292398
2013-05-21	6.72	2	-1.62365
2013-05-22	6.91	3	2.78815
2013-05-23	6.95	4	0.577202
2013-05-24	6.89	5	-0.867057
2013-05-27	6.89	1	0
2013-05-28	7.02	2	1.86921
2013-05-29	6.99	3	-0.428266
2013-05-30	6.89	4	-1.44095
2013-05-31	6.95	5	0.867057
2013-06-03	6.88	1	-1.0123
2013-06-04	6.93	2	0.724116
2013-06-05	6.93	3	0
2013-06-06	6.94	4	0.144196
2013-06-07	6.96	5	0.28777
2013-06-10	6.81	1	-2.17874
2013-06-11	6.9	2	1.31293
2013-06-12	6.83	3	-1.01967
2013-06-13	6.74	4	-1.32647
2013-06-14	6.86	5	1.76475
2013-06-17	6.99	1	1.87731
2013-06-18	7.06	2	0.99645
2013-06-19	7.17	3	1.54606
2013-06-20	7.09	4	-1.12203
2013-06-21	6.96	5	-1.85059
2013-06-24	6.88	1	-1.15608
2013-06-25	6.91	2	0.435099
2013-06-26	7	3	1.29405
2013-06-27	7	4	0
2013-06-28	6.97	5	-0.429492
2013-07-01	6.57	1	-5.91014
2013-07-02	6.75	2	2.70287
2013-07-03	6.76	3	0.148039
2013-07-04	6.76	4	0
2013-07-05	6.7	5	-0.891536
2013-07-08	6.83	1	1.92171
2013-07-09	6.93	2	1.45351
2013-07-10	7.02	3	1.29034
2013-07-11	7.06	4	0.568183
2013-07-12	6.83	5	-3.31204
2013-07-15	6.73	1	-1.47495
2013-07-16	6.76	2	0.444775
2013-07-17	6.76	3	0
2013-07-18	6.76	4	0
2013-07-19	6.82	5	0.883658
2013-07-22	6.83	1	0.14652
2013-07-23	6.64	2	-2.82127
2013-07-24	6.47	3	-2.59359
2013-07-25	6.12	4	-5.5614
2013-07-26	5.95	5	-2.81709
2013-07-29	5.91	1	-0.674539
2013-07-30	5.96	2	0.842465
2013-07-31	6.04	3	1.33335
2013-08-01	5.97	4	-1.16571
2013-08-02	5.81	5	-2.71664
2013-08-05	5.74	1	-1.21214
2013-08-06	5.77	2	0.521287
2013-08-07	5.78	3	0.17316
2013-08-08	5.85	4	1.2038
2013-08-09	5.81	5	-0.686109
2013-08-12	5.88	1	1.19762
2013-08-13	5.74	2	-2.40976
2013-08-14	5.83	3	1.55578
2013-08-15	6.03	4	3.373
2013-08-16	5.94	5	-1.50379
2013-08-19	6.2	1	4.28402
2013-08-20	6.1	2	-1.62605
2013-08-21	6.26	3	2.58914
2013-08-22	6.22	4	-0.641028
2013-08-23	6.3	5	1.27797
2013-08-26	6.3	1	0
2013-08-27	6.1	2	-3.22609
2013-08-28	6.09	3	-0.164069
2013-08-29	5.98	4	-1.82275
2013-08-30	5.88	5	-1.68638
2013-09-02	5.88	1	0
2013-09-03	5.74	2	-2.40976
2013-09-04	5.67	3	-1.22701
2013-09-05	5.46	4	-3.77403
2013-09-06	5.46	5	0
2013-09-09	5.01	1	-8.60129
2013-09-10	5.04	2	0.597017
2013-09-11	5.04	3	0
2013-09-12	4.94	4	-2.00408
2013-09-13	4.69	5	-5.19327
2013-09-16	4.6	1	-1.93763
2013-09-17	4.52	2	-1.75443
2013-09-18	4.44	3	-1.78576
2013-09-19	4.5	4	1.3423
2013-09-20	4.44	5	-1.3423
2013-09-23	4.4	1	-0.904984
2013-09-24	4.35	2	-1.14287
2013-09-25	4.38	3	0.687288
2013-09-26	4.37	4	-0.228572
2013-09-27	4.34	5	-0.688866
2013-09-30	4.19	1	-3.51736
2013-10-01	4.19	2	0
2013-10-02	4.19	3	0
2013-10-03	4.19	4	0
2013-10-04	4.19	5	0
2013-10-07	4.19	1	0
2013-10-08	4.19	2	0
2013-10-09	4.19	3	0
2013-10-10	4.19	4	0
2013-10-11	4.19	5	0
2013-10-14	4.19	1	0
2013-10-15	4.19	2	0
2013-10-16	4.19	3	0
2013-10-17	4.23	4	0.950126
2013-10-18	4.21	5	-0.473935
2013-10-21	4.23	1	0.473935
2013-10-22	4.17	2	-1.4286
2013-10-23	4.28	3	2.6037
2013-10-24	4.24	4	-0.938974
2013-10-25	4.2	5	-0.947874
2013-10-28	4.18	1	-0.477328
2013-10-29	4.19	2	0.238949
2013-10-30	4.17	3	-0.47847
2013-10-31	4.15	4	-0.48077
2013-11-01	4.13	5	-0.483093
2013-11-04	4.12	1	-0.242424
2013-11-05	4.1	2	-0.486619
2013-11-06	4.06	3	-0.9804
2013-11-07	4.05	4	-0.246609
2013-11-08	4.14	5	2.19789
2013-11-11	4.2	1	1.43887
2013-11-12	4.18	2	-0.477328
2013-11-13	4.16	3	-0.479617
2013-11-14	4.13	4	-0.723767
2013-11-15	4.08	5	-1.21804
2013-11-18	3.98	1	-2.48152
2013-11-19	4.04	2	1.49629
2013-11-20	4.03	3	-0.247832
2013-11-21	4.11	4	1.96567
2013-11-22	4.1	5	-0.243605
2013-11-25	4.13	1	0.729043
2013-11-26	4.09	2	-0.973244
2013-11-27	4.09	3	0
2013-11-28	4.09	4	0
2013-11-29	4.09	5	0
2013-12-02	4.06	1	-0.7362
2013-12-03	4.11	2	1.22401
2013-12-04	4.16	3	1.2092
2013-12-05	4.16	4	0
2013-12-06	4.15	5	-0.240674
2013-12-09	4.19	1	0.95924
2013-12-10	4.17	2	-0.47847
2013-12-11	4.17	3	0
2013-12-12	4.16	4	-0.240096
2013-12-13	4.05	5	-2.67982
2013-12-16	4.03	1	-0.495051
2013-12-17	4.07	2	0.987662
2013-12-18	4.09	3	0.490197
2013-12-19	4.13	4	0.973244
2013-12-20	4.13	5	0
2013-12-23	4.19	1	1.44233
2013-12-24	4.2	2	0.238379
2013-12-25	4.2	3	0
2013-12-26	4.09	4	-2.65396
2013-12-27	4.1	5	0.2442
2013-12-30	4.06	1	-0.9804
2013-12-31	4.05	2	-0.246609
2014-01-01	4.05	3	0
2014-01-02	4.05	4	0
2014-01-03	4.1	5	1.22701
2014-01-06	4.1	1	0
2014-01-07	4.1	2	0
2014-01-08	3.98	3	-2.97052
2014-01-09	3.98	4	0
2014-01-10	4.17	5	4.66342
2014-01-13	4.19	1	0.47847
2014-01-14	4.16	2	-0.718566
2014-01-15	4.1	3	-1.45281
2014-01-16	4.13	4	0.729043
2014-01-17	4.08	5	-1.21804
2014-01-20	4.08	1	0
2014-01-21	4.09	2	0.244798
2014-01-22	4.1	3	0.2442
2014-01-23	4.1	4	0
2014-01-24	4.17	5	1.69291
2014-01-27	4.16	1	-0.240096
2014-01-28	4.16	2	0
2014-01-29	4.13	3	-0.723767
2014-01-30	4.19	4	1.44233
2014-01-31	4.19	5	0
2014-02-03	4.21	1	0.476191
2014-02-04	4.31	2	2.34753
2014-02-05	4.31	3	0
2014-02-06	4.29	4	-0.465117
2014-02-07	4.29	5	0
2014-02-10	4.28	1	-0.233372
2014-02-11	4.27	2	-0.233918
2014-02-12	4.26	3	-0.234467
2014-02-13	4.26	4	0
2014-02-14	4.23	5	-0.706717
2014-02-17	4.23	1	0
2014-02-18	4.35	2	2.79739
2014-02-19	4.39	3	0.915338
2014-02-20	4.41	4	0.454546
2014-02-21	4.38	5	-0.682597
2014-02-24	4.36	1	-0.457667
2014-02-25	4.36	2	0
2014-02-26	4.4	3	0.913248
2014-02-27	4.33	4	-1.6037
2014-02-28	4.44	5	2.50868
2014-03-03	4.5	1	1.3423
2014-03-04	4.61	2	2.41505
2014-03-05	4.59	3	-0.434783
2014-03-06	4.68	4	1.94181
2014-03-07	4.64	5	-0.858374
2014-03-10	4.57	1	-1.52012
2014-03-11	4.6	2	0.65431
2014-03-12	4.66	3	1.29591
2014-03-13	4.63	4	-0.645858
2014-03-14	4.64	5	0.21575
2014-03-17	4.57	1	-1.52012
2014-03-18	4.64	2	1.52012
2014-03-19	4.65	3	0.215285
2014-03-20	4.57	4	-1.7354
2014-03-21	4.57	5	0
2014-03-24	4.68	1	2.37849
2014-03-25	4.67	2	-0.213904
2014-03-26	4.65	3	-0.429185
2014-03-27	4.72	4	1.49416
2014-03-28	4.72	5	0
2014-03-31	4.82	1	2.09651
2014-04-01	4.89	2	1.44184
2014-04-02	4.76	3	-2.69446
2014-04-03	4.81	4	1.04494
2014-04-04	4.82	5	0.207684
2014-04-07	4.8	1	-0.415801
2014-04-08	4.88	2	1.65293
2014-04-09	4.83	3	-1.02988
2014-04-10	4.82	4	-0.207254
2014-04-11	4.79	5	-0.624352
2014-04-14	4.83	1	0.831606
2014-04-15	4.84	2	0.206825
2014-04-16	4.78	3	-1.24742
2014-04-17	4.76	4	-0.419288
2014-04-18	4.76	5	0
2014-04-21	4.76	1	0
2014-04-22	4.77	2	0.209864
2014-04-23	4.86	3	1.86921
2014-04-24	4.84	4	-0.412372
2014-04-25	4.88	5	0.82305
2014-04-28	4.91	1	0.612872
2014-04-29	4.98	2	1.41559
2014-04-30	4.96	3	-0.402415
2014-05-01	4.85	4	-2.2427
2014-05-02	4.78	5	-1.45382
2014-05-05	4.86	1	1.65979
2014-05-06	4.96	2	2.03673
2014-05-07	4.95	3	-0.201816
2014-05-08	4.97	4	0.403226
2014-05-09	4.88	5	-1.82746
2014-05-12	4.8	1	-1.65293
2014-05-13	4.84	2	0.82988
2014-05-14	4.77	3	-1.45684
2014-05-15	4.66	4	-2.33309
2014-05-16	4.65	5	-0.214823
2014-05-19	4.59	1	-1.29872
2014-05-20	4.57	2	-0.436682
2014-05-21	4.56	3	-0.219058
2014-05-22	4.59	4	0.65574
2014-05-23	4.6	5	0.217628
2014-05-26	4.6	1	0
2014-05-27	4.53	2	-1.53344
2014-05-28	4.57	3	0.879127
2014-05-29	4.55	4	-0.438597
2014-05-30	4.52	5	-0.661524
2014-06-02	4.52	1	0
2014-06-03	4.46	2	-1.33632
2014-06-04	4.44	3	-0.449439
2014-06-05	4.38	4	-1.36057
2014-06-06	4.47	5	2.03397
2014-06-09	4.41	1	-1.35137
2014-06-10	4.36	2	-1.14026
2014-06-11	4.32	3	-0.921666
2014-06-12	4.35	4	0.692044
2014-06-13	4.38	5	0.687288
2014-06-16	4.33	1	-1.14812
2014-06-17	4.31	2	-0.462964
2014-06-18	4.33	3	0.462964
2014-06-19	4.42	4	2.05722
2014-06-20	4.45	5	0.67644
2014-06-23	4.37	1	-1.81411
2014-06-24	4.35	2	-0.458716
2014-06-25	4.33	3	-0.46083
2014-06-26	4.35	4	0.46083
2014-06-27	4.36	5	0.229621
2014-06-30	4.13	1	-5.41947
2014-07-01	4.08	2	-1.21804
2014-07-02	4.06	3	-0.491401
2014-07-03	4.02	4	-0.990107
2014-07-04	4.02	5	0
2014-07-07	3.92	1	-2.51902
2014-07-08	3.91	2	-0.255428
2014-07-09	3.84	3	-1.8065
2014-07-10	3.79	4	-1.31063
2014-07-11	3.73	5	-1.59578
2014-07-14	3.77	1	1.06668
2014-07-15	3.69	2	-2.14485
2014-07-16	3.72	3	0.809721
2014-07-17	3.73	4	0.268457
2014-07-18	3.65	5	-2.16811
2014-07-21	3.63	1	-0.549452
2014-07-22	3.57	2	-1.66671
2014-07-23	3.63	3	1.66671
2014-07-24	3.58	4	-1.38698
2014-07-25	3.58	5	0
2014-07-28	3.63	1	1.38698
2014-07-29	3.58	2	-1.38698
2014-07-30	3.52	3	-1.69018
2014-07-31	3.53	4	0.283688
2014-08-01	3.46	5	-2.00293
2014-08-04	3.52	1	1.71924
2014-08-05	3.52	2	0
2014-08-06	3.59	3	1.96912
2014-08-07	3.57	4	-0.558661
2014-08-08	3.49	5	-2.26639
2014-08-11	3.54	1	1.4225
2014-08-12	3.56	2	0.563382
2014-08-13	3.55	3	-0.281294
2014-08-14	3.59	4	1.12046
2014-08-15	3.63	5	1.10804
2014-08-18	3.58	1	-1.38698
2014-08-19	3.65	2	1.93644
2014-08-20	3.63	3	-0.549452
2014-08-21	3.65	4	0.549452
2014-08-22	3.69	5	1.08993
2014-08-25	3.63	1	-1.63938
2014-08-26	3.59	2	-1.10804
2014-08-27	3.59	3	0
2014-08-28	3.68	4	2.47605
2014-08-29	3.62	5	-1.64387
2014-09-01	3.62	1	0
2014-09-02	3.56	2	-1.67135
2014-09-03	3.49	3	-1.98588
2014-09-04	3.41	4	-2.31894
2014-09-05	3.43	5	0.584797
2014-09-08	3.34	1	-2.65895
2014-09-09	3.32	2	-0.600602
2014-09-10	3.3	3	-0.604231
2014-09-11	3.26	4	-1.21953
2014-09-12	3.23	5	-0.924506
2014-09-15	3.2	1	-0.933133
2014-09-16	3.19	2	-0.312989
2014-09-17	3.17	3	-0.628933
2014-09-18	3.07	4	-3.2054
2014-09-19	3.03	5	-1.31149
2014-09-22	2.99	1	-1.32892
2014-09-23	2.9	2	-3.05627
2014-09-24	2.93	3	1.02917
2014-09-25	2.91	4	-0.684934
2014-09-26	2.85	5	-2.08341
2014-09-29	2.86	1	0.350263
2014-09-30	2.82	2	-1.40847
2014-10-01	2.79	3	-1.06953
2014-10-02	2.81	4	0.714289
2014-10-03	2.8	5	-0.356507
2014-10-06	2.88	1	2.81709
2014-10-07	2.98	2	3.4133
2014-10-08	3	3	0.668899
2014-10-09	3.03	4	0.995033
2014-10-10	2.94	5	-3.0153
2014-10-13	2.94	1	0
2014-10-14	3.14	2	6.58132
2014-10-15	3.08	3	-1.92932
2014-10-16	3.13	4	1.61034
2014-10-17	3.09	5	-1.28619
2014-10-20	3.09	1	0
2014-10-21	3.16	2	2.24009
2014-10-22	3.14	3	-0.634923
2014-10-23	3.2	4	1.8928
2014-10-24	3.14	5	-1.8928
2014-10-27	3.23	1	2.82593
2014-10-28	3.26	2	0.924506
2014-10-29	3.33	3	2.12451
2014-10-30	3.32	4	-0.300752
2014-10-31	3.39	5	2.08651
2014-11-03	3.38	1	-0.295421
2014-11-04	3.28	2	-3.00323
2014-11-05	3.37	3	2.70693
2014-11-06	3.38	4	0.296297
2014-11-07	3.38	5	0
2014-11-10	3.4	1	0.589972
2014-11-11	3.4	2	0
2014-11-12	3.48	3	2.32569
2014-11-13	3.56	4	2.27283
2014-11-14	3.53	5	-0.846267
2014-11-17	3.51	1	-0.568183
2014-11-18	3.46	2	-1.43474
2014-11-19	3.38	3	-2.33929
2014-11-20	3.46	4	2.33929
2014-11-21	3.49	5	0.863315
2014-11-24	3.44	1	-1.44303
2014-11-25	3.5	2	1.72915
2014-11-26	3.55	3	1.41846
2014-11-27	3.55	4	0
2014-11-28	3.55	5	0
2014-12-01	3.55	1	0
2014-12-02	3.52	2	-0.848661
2014-12-03	3.54	3	0.566574
2014-12-04	3.63	4	2.51059
2014-12-05	3.67	5	1.0959
2014-12-08	3.63	1	-1.0959
2014-12-09	3.67	2	1.0959
2014-12-10	3.68	3	0.272109
2014-12-11	3.73	4	1.34955
2014-12-12	3.77	5	1.06668
2014-12-15	3.82	1	1.31754
2014-12-16	3.79	2	-0.78844
2014-12-17	3.81	3	0.526317
2014-12-18	3.84	4	0.784318
2014-12-19	3.84	5	0
2014-12-22	3.85	1	0.260078
2014-12-23	3.88	2	0.776201
2014-12-24	3.82	3	-1.55847
2014-12-25	3.82	4	0
2014-12-26	3.9	5	2.07261
2014-12-29	3.88	1	-0.51414
2014-12-30	3.82	2	-1.55847
2014-12-31	3.72	3	-2.65268
2015-01-01	3.72	4	0
2015-01-02	3.7	5	-0.539085
2015-01-05	3.81	1	2.92964
2015-01-06	3.8	2	-0.262812
2015-01-07	3.71	3	-2.39692
2015-01-08	3.68	4	-0.811912
2015-01-09	3.74	5	1.61729
2015-01-12	3.8	1	1.59155
2015-01-13	3.64	2	-4.30174
2015-01-14	3.59	3	-1.38315
2015-01-15	3.61	4	0.555557
2015-01-16	3.66	5	1.37554
2015-01-19	3.66	1	0
2015-01-20	3.71	2	1.35687
2015-01-21	3.7	3	-0.269906
2015-01-22	3.65	4	-1.36057
2015-01-23	3.68	5	0.818558
2015-01-26	3.65	1	-0.818558
2015-01-27	3.63	2	-0.549452
2015-01-28	3.54	3	-2.51059
2015-01-29	3.53	4	-0.282886
2015-01-30	3.5	5	-0.85349
2015-02-02	3.51	1	0.285307
2015-02-03	3.66	2	4.18471
2015-02-04	3.64	3	-0.547947
2015-02-05	3.65	4	0.274349
2015-02-06	3.66	5	0.273598
2015-02-09	3.71	1	1.35687
2015-02-10	3.68	2	-0.811912
2015-02-11	3.67	3	-0.272109
2015-02-12	3.64	4	-0.820798
2015-02-13	3.64	5	0
2015-02-16	3.64	1	0
2015-02-17	3.71	2	1.90482
2015-02-18	3.65	3	-1.63047
2015-02-19	3.72	4	1.89965
2015-02-20	3.67	5	-1.3532
2015-02-23	3.61	1	-1.64839
2015-02-24	3.6	2	-0.277393
2015-02-25	3.58	3	-0.557105
2015-02-26	3.63	4	1.38698
2015-02-27	3.67	5	1.0959
2015-03-02	3.64	1	-0.820798
2015-03-03	3.67	2	0.820798
2015-03-04	3.66	3	-0.272851
2015-03-05	3.67	4	0.272851
2015-03-06	3.65	5	-0.546449
2015-03-09	3.65	1	0
2015-03-10	3.64	2	-0.274349
2015-03-11	3.67	3	0.820798
2015-03-12	3.66	4	-0.272851
2015-03-13	3.58	5	-2.21003
2015-03-16	3.59	1	0.27894
2015-03-17	3.51	2	-2.25362
2015-03-18	3.55	3	1.13316
2015-03-19	3.54	4	-0.282088
2015-03-20	3.68	5	3.8786
2015-03-23	3.74	1	1.61729
2015-03-24	3.77	2	0.798939
2015-03-25	3.79	3	0.529102
2015-03-26	3.75	4	-1.06102
2015-03-27	3.75	5	0
2015-03-30	3.79	1	1.06102
2015-03-31	3.57	2	-5.98004
2015-04-01	3.57	3	0
2015-04-02	3.7	4	3.57672
2015-04-03	3.7	5	0
2015-04-06	3.68	1	-0.542007
2015-04-07	3.66	2	-0.54496
2015-04-08	3.62	3	-1.09891
2015-04-09	3.61	4	-0.276625
2015-04-10	3.6	5	-0.277393
2015-04-13	3.55	1	-1.39862
2015-04-14	3.58	2	0.84152
2015-04-15	3.6	3	0.557105
2015-04-16	3.6	4	0
2015-04-17	3.64	5	1.10498
2015-04-20	3.65	1	0.274349
2015-04-21	3.6	2	-1.37933
2015-04-22	3.6	3	0
2015-04-23	3.58	4	-0.557105
2015-04-24	3.52	5	-1.69018
2015-04-27	3.48	1	-1.14287
2015-04-28	3.48	2	0
2015-04-29	3.55	3	1.99153
2015-04-30	3.5	4	-1.41846
2015-05-01	3.47	5	-0.860837
2015-05-04	3.48	1	0.28777
2015-05-05	3.5	2	0.573067
2015-05-06	3.55	3	1.41846
2015-05-07	3.5	4	-1.41846
2015-05-08	3.52	5	0.569802
2015-05-11	3.5	1	-0.569802
2015-05-12	3.5	2	0
2015-05-13	3.52	3	0.569802
2015-05-14	3.56	4	1.12996
2015-05-15	3.55	5	-0.281294
2015-05-18	3.57	1	0.561799
2015-05-19	3.49	2	-2.26639
2015-05-20	3.47	3	-0.574714
2015-05-21	3.52	4	1.43064
2015-05-22	3.47	5	-1.43064
2015-05-25	3.47	1	0
2015-05-26	3.42	2	-1.4514
2015-05-27	3.38	3	-1.17648
2015-05-28	3.41	4	0.883658
2015-05-29	3.39	5	-0.588237
2015-06-01	3.44	1	1.46415
2015-06-02	3.47	2	0.868312
2015-06-03	3.46	3	-0.2886
2015-06-04	3.51	4	1.43474
2015-06-05	3.47	5	-1.14614
2015-06-08	3.51	1	1.14614
2015-06-09	3.51	2	0
2015-06-10	3.45	3	-1.72418
2015-06-11	3.44	4	-0.290276
2015-06-12	3.4	5	-1.1696
2015-06-15	3.36	1	-1.18345
2015-06-16	3.42	2	1.76996
2015-06-17	3.47	3	1.4514
2015-06-18	3.46	4	-0.2886
2015-06-19	3.41	5	-1.45563
2015-06-22	3.48	1	2.032
2015-06-23	3.55	2	1.99153
2015-06-24	3.54	3	-0.282088
2015-06-25	3.63	4	2.51059
2015-06-26	3.7	5	1.91002
2015-06-29	3.67	1	-0.814116
2015-06-30	3.97	2	7.85744
2015-07-01	3.97	3	0
2015-07-02	4.03	4	1.50003
2015-07-03	4.03	5	0
2015-07-06	4.01	1	-0.497513
2015-07-07	3.96	2	-1.25472
2015-07-08	3.99	3	0.754721
2015-07-09	4.03	4	0.997515
2015-07-10	4.09	5	1.47786
2015-07-13	4.15	1	1.45634
2015-07-14	4.02	2	-3.18264
2015-07-15	4.04	3	0.496279
2015-07-16	4.04	4	0
2015-07-17	3.94	5	-2.5064
2015-07-20	3.79	1	-3.88147
2015-07-21	3.81	2	0.526317
2015-07-22	3.77	3	-1.05542
2015-07-23	3.77	4	0
2015-07-24	3.7	5	-1.87422
2015-07-27	3.51	1	-5.27168
2015-07-28	3.53	2	0.568183
2015-07-29	3.44	3	-2.58264
2015-07-30	3.54	4	2.86553
2015-07-31	3.54	5	0
2015-08-03	3.49	1	-1.4225
2015-08-04	3.51	2	0.57143
2015-08-05	3.55	3	1.13316
2015-08-06	3.52	4	-0.848661
2015-08-07	3.55	5	0.848661
2015-08-10	3.72	1	4.67761
2015-08-11	3.62	2	-2.72496
2015-08-12	3.36	3	-7.45331
2015-08-13	3.48	4	3.50913
2015-08-14	3.48	5	0
2015-08-17	3.46	1	-0.57637
2015-08-18	3.5	2	1.14944
2015-08-19	3.5	3	0
2015-08-20	3.54	4	1.13638
2015-08-21	3.48	5	-1.70944
2015-08-24	3.52	1	1.14287
2015-08-25	3.49	2	-0.855925
2015-08-26	3.45	3	-1.15275
2015-08-27	3.47	4	0.578036
2015-08-28	3.46	5	-0.2886
2015-08-31	3.47	1	0.2886
2015-09-01	3.42	2	-1.4514
2015-09-02	3.43	3	0.291971
2015-09-03	3.36	4	-2.06193
2015-09-04	3.39	5	0.888895
2015-09-07	3.39	1	0
2015-09-08	3.44	2	1.46415
2015-09-09	3.45	3	0.290276
2015-09-10	3.5	4	1.43887
2015-09-11	3.59	5	2.53892
2015-09-14	3.65	1	1.6575
2015-09-15	3.61	2	-1.10194
2015-09-16	3.56	3	-1.39472
2015-09-17	3.5	4	-1.69976
2015-09-18	3.51	5	0.285307
2015-09-21	3.59	1	2.25362
2015-09-22	3.57	2	-0.558661
2015-09-23	3.6	3	0.836825
2015-09-24	3.59	4	-0.278164
2015-09-25	3.66	5	1.93109
2015-09-28	3.65	1	-0.273598
2015-09-29	3.69	2	1.08993
2015-09-30	3.68	3	-0.271371
2015-10-01	3.69	4	0.271371
2015-10-02	3.68	5	-0.271371
2015-10-05	3.73	1	1.34955
2015-10-06	3.76	2	0.801072
2015-10-07	3.77	3	0.265604
2015-10-08	3.72	4	-1.33513
2015-10-09	3.66	5	-1.62605
2015-10-12	3.66	1	0
2015-10-13	3.68	2	0.54496
2015-10-14	3.61	3	-1.9205
2015-10-15	3.58	4	-0.834497
2015-10-16	3.59	5	0.27894
2015-10-19	3.55	1	-1.12046
2015-10-20	3.6	2	1.39862
2015-10-21	3.64	3	1.10498
2015-10-22	3.64	4	0
2015-10-23	3.66	5	0.547947
2015-10-26	3.7	1	1.08697
2015-10-27	3.66	2	-1.08697
2015-10-28	3.63	3	-0.82305
2015-10-29	3.67	4	1.0959
2015-10-30	3.69	5	0.54348
2015-11-02	3.66	1	-0.816331
2015-11-03	3.7	2	1.08697
2015-11-04	3.74	3	1.07528
2015-11-05	3.67	4	-1.88939
2015-11-06	3.66	5	-0.272851
2015-11-09	3.61	1	-1.37554
2015-11-10	3.54	2	-1.9581
2015-11-11	3.54	3	0
2015-11-12	3.58	4	1.12361
2015-11-13	3.54	5	-1.12361
2015-11-16	3.56	1	0.563382
2015-11-17	3.58	2	0.560226
2015-11-18	3.58	3	0
2015-11-19	3.61	4	0.834497
2015-11-20	3.6	5	-0.277393
2015-11-23	3.6	1	0
2015-11-24	3.61	2	0.277393
2015-11-25	3.63	3	0.552488
2015-11-26	3.63	4	0
2015-11-27	3.63	5	0
2015-11-30	3.61	1	-0.552488
2015-12-01	3.64	2	0.827591
2015-12-02	3.6	3	-1.10498
2015-12-03	3.67	4	1.92578
2015-12-04	3.73	5	1.62166
2015-12-07	3.66	1	-1.89451
2015-12-08	3.65	2	-0.273598
2015-12-09	3.65	3	0
2015-12-10	3.68	4	0.818558
2015-12-11	3.65	5	-0.818558
2015-12-14	3.7	1	1.36057
2015-12-15	3.68	2	-0.542007
2015-12-16	3.61	3	-1.9205
2015-12-17	3.65	4	1.10194
2015-12-18	3.65	5	0
2015-12-21	3.61	1	-1.10194
2015-12-22	3.55	2	-1.67602
2015-12-23	3.55	3	0
2015-12-24	3.54	4	-0.282088
2015-12-25	3.54	5	0
2015-12-28	3.5	1	-1.13638
2015-12-29	3.51	2	0.285307
2015-12-30	3.49	3	-0.57143
2015-12-31	3.5	4	0.286123
2016-01-01	3.5	5	0
2016-01-04	3.43	1	-2.02027
2016-01-05	3.44	2	0.291121
2016-01-06	3.44	3	0
2016-01-07	3.43	4	-0.291121
2016-01-08	3.47	5	1.15943
2016-01-11	3.42	1	-1.4514
2016-01-12	3.5	2	2.31224
2016-01-13	3.49	3	-0.286123
2016-01-14	3.5	4	0.286123
2016-01-15	3.55	5	1.41846
2016-01-18	3.55	1	0
2016-01-19	3.61	2	1.67602
2016-01-20	3.62	3	0.276625
2016-01-21	3.6	4	-0.554018
2016-01-22	3.63	5	0.82988
2016-01-25	3.63	1	0
2016-01-26	3.64	2	0.275103
2016-01-27	3.64	3	0
2016-01-28	3.61	4	-0.827591
2016-01-29	3.67	5	1.64839
2016-02-01	3.66	1	-0.272851
2016-02-02	3.66	2	0
2016-02-03	3.64	3	-0.547947
2016-02-04	3.62	4	-0.550966
2016-02-05	3.59	5	-0.832182
2016-02-08	3.55	1	-1.12046
2016-02-09	3.54	2	-0.282088
2016-02-10	3.54	3	0
2016-02-11	3.54	4	0
2016-02-12	3.52	5	-0.566574
2016-02-15	3.52	1	0
2016-02-16	3.57	2	1.41046
2016-02-17	3.6	3	0.836825
2016-02-18	3.58	4	-0.557105
2016-02-19	3.58	5	0
2016-02-22	3.59	1	0.27894
2016-02-23	3.55	2	-1.12046
2016-02-24	3.53	3	-0.564973
2016-02-25	3.48	4	-1.42656
2016-02-26	3.47	5	-0.28777
2016-02-29	3.46	1	-0.2886
2016-03-01	3.45	2	-0.289436
2016-03-02	3.46	3	0.289436
2016-03-03	3.46	4	0
2016-03-04	3.47	5	0.2886
2016-03-07	3.48	1	0.28777
2016-03-08	3.5	2	0.573067
2016-03-09	3.5	3	0
2016-03-10	3.54	4	1.13638
2016-03-11	3.55	5	0.282088
2016-03-14	3.58	1	0.84152
2016-03-15	3.58	2	0
2016-03-16	3.58	3	0
2016-03-17	3.59	4	0.27894
2016-03-18	3.57	5	-0.558661
2016-03-21	3.59	1	0.558661
2016-03-22	3.6	2	0.278164
2016-03-23	3.59	3	-0.278164
2016-03-24	3.6	4	0.278164
2016-03-25	3.6	5	0
2016-03-28	3.6	1	0
2016-03-29	3.63	2	0.82988
2016-03-30	3.57	3	-1.66671
2016-03-31	3.41	4	-4.58533
2016-04-01	3.44	5	0.875918
2016-04-04	3.44	1	0
2016-04-05	3.46	2	0.579712
2016-04-06	3.47	3	0.2886
2016-04-07	3.51	4	1.14614
2016-04-08	3.52	5	0.284495
2016-04-11	3.47	1	-1.43064
2016-04-12	3.53	2	1.71433
2016-04-13	3.64	3	3.06858
2016-04-14	3.63	4	-0.275103
2016-04-15	3.68	5	1.36801
2016-04-18	3.69	1	0.271371
2016-04-19	3.73	2	1.07818
2016-04-20	3.82	3	2.38422
2016-04-21	3.7	4	-3.19176
2016-04-22	3.57	5	-3.57672
2016-04-25	3.62	1	1.39084
2016-04-26	3.67	2	1.37176
2016-04-27	3.66	3	-0.272851
2016-04-28	3.72	4	1.62605
2016-04-29	3.75	5	0.803217
2016-05-02	3.75	1	0
2016-05-03	3.63	2	-3.25232
2016-05-04	3.6	3	-0.82988
2016-05-05	3.57	4	-0.836825
2016-05-06	3.6	5	0.836825
2016-05-09	3.53	1	-1.9636
2016-05-10	3.63	2	2.79348
2016-05-11	3.6	3	-0.82988
2016-05-12	3.71	4	3.0098
2016-05-13	3.75	5	1.0724
2016-05-16	3.78	1	0.796817
2016-05-17	3.8	2	0.527706
2016-05-18	3.82	3	0.524936
2016-05-19	3.73	4	-2.38422
2016-05-20	3.78	5	1.33158
2016-05-23	3.8	1	0.527706
2016-05-24	3.81	2	0.262812
2016-05-25	3.88	3	1.8206
2016-05-26	3.9	4	0.51414
2016-05-27	3.95	5	1.2739
2016-05-30	3.95	1	0
2016-05-31	3.87	2	-2.04611
2016-06-01	3.95	3	2.04611
2016-06-02	3.98	4	0.756624
2016-06-03	4	5	0.501254
2016-06-06	4.09	1	2.22506
2016-06-07	4.09	2	0
2016-06-08	4.12	3	0.730819
2016-06-09	4.07	4	-1.22102
2016-06-10	4.04	5	-0.739831
2016-06-13	4.11	1	1.71783
2016-06-14	4.17	2	1.4493
2016-06-15	4.09	3	-1.93711
2016-06-16	4.05	4	-0.982809
2016-06-17	4.18	5	3.15944
2016-06-20	4	1	-4.40169
2016-06-21	3.74	2	-6.72087
2016-06-22	3.73	3	-0.267738
2016-06-23	3.69	4	-1.07818
2016-06-24	3.67	5	-0.54348
2016-06-27	3.67	1	0
2016-06-28	3.67	2	0
2016-06-29	3.52	3	-4.17307
2016-06-30	3.44	4	-2.29895
2016-07-01	3.38	5	-1.75958
2016-07-04	3.38	1	0
2016-07-05	3.28	2	-3.00323
2016-07-06	3.2	3	-2.46926
2016-07-07	3.2	4	0
2016-07-08	3.35	5	4.58095
2016-07-11	3.31	1	-1.20122
2016-07-12	3.34	2	0.902262
2016-07-13	3.43	3	2.65895
2016-07-14	3.39	4	-1.17303
2016-07-15	3.36	5	-0.888895
2016-07-18	3.4	1	1.18345
2016-07-19	3.27	2	-3.89854
2016-07-20	3.24	3	-0.921666
2016-07-21	3.2	4	-1.24225
2016-07-22	3.21	5	0.312013
2016-07-25	3.21	1	0
2016-07-26	3.19	2	-0.625002
2016-07-27	3.23	3	1.24612
2016-07-28	3.21	4	-0.62112
2016-07-29	3.22	5	0.311042
2016-08-01	3.13	1	-2.83484
2016-08-02	3.11	2	-0.641028
2016-08-03	3.13	3	0.641028
2016-08-04	3.09	4	-1.28619
2016-08-05	3.13	5	1.28619
2016-08-08	3.13	1	0
2016-08-09	3.1	2	-0.963089
2016-08-10	3.11	3	0.322061
2016-08-11	3.09	4	-0.645164
2016-08-12	3.08	5	-0.324149
2016-08-15	3.12	1	1.29034
2016-08-16	3.12	2	0
2016-08-17	3.16	3	1.2739
2016-08-18	3.16	4	0
2016-08-19	3.17	5	0.315956
2016-08-22	3.19	1	0.628933
2016-08-23	3.15	2	-1.26185
2016-08-24	3.14	3	-0.317965
2016-08-25	3.08	4	-1.92932
2016-08-26	3.01	5	-2.29895
2016-08-29	2.96	1	-1.67508
2016-08-30	2.89	2	-2.39328
2016-08-31	2.88	3	-0.346621
2016-09-01	3.02	4	4.74665
2016-09-02	3.02	5	0
2016-09-05	3.02	1	0
2016-09-06	3.05	2	0.988476
2016-09-07	3.1	3	1.62605
2016-09-08	3.16	4	1.91699
2016-09-09	3.16	5	0
2016-09-12	3.15	1	-0.316957
2016-09-13	3.1	2	-1.60003
2016-09-14	3.11	3	0.322061
2016-09-15	3.08	4	-0.969313
2016-09-16	3.13	5	1.61034
2016-09-19	3.11	1	-0.641028
2016-09-20	3.15	2	1.27797
2016-09-21	3.14	3	-0.317965
2016-09-22	3.11	4	-0.960007
2016-09-23	3.1	5	-0.322061
2016-09-26	3.03	1	-2.28395
2016-09-27	3.05	2	0.657897
2016-09-28	3.01	3	-1.32015
2016-09-29	3.01	4	0
2016-09-30	3.09	5	2.6231
2016-10-03	3.18	1	2.87101
2016-10-04	3.2	2	0.626961
2016-10-05	3.2	3	0
2016-10-06	3.13	4	-2.21178
2016-10-07	3.12	5	-0.32
2016-10-10	3.12	1	0
2016-10-11	3.21	2	2.84379
2016-10-12	3.13	3	-2.52379
2016-10-13	3.24	4	3.45403
2016-10-14	3.32	5	2.43915
2016-10-17	3.33	1	0.300752
2016-10-18	3.33	2	0
2016-10-19	3.38	3	1.49034
2016-10-20	3.31	4	-2.09275
2016-10-21	3.32	5	0.301659
2016-10-24	3.26	1	-1.82376
2016-10-25	3.29	2	0.916037
2016-10-26	3.34	3	1.50832
2016-10-27	3.38	4	1.19049
2016-10-28	3.35	5	-0.891536
2016-10-31	3.35	1	0
2016-11-01	3.29	2	-1.80728
2016-11-02	3.27	3	-0.609758
2016-11-03	3.31	4	1.21582
2016-11-04	3.31	5	0
2016-11-07	3.28	1	-0.910477
2016-11-08	3.38	2	3.00323
2016-11-09	3.24	3	-4.23024
2016-11-10	3.26	4	0.615387
2016-11-11	3.26	5	0
2016-11-14	3.2	1	-1.85764
2016-11-15	3.24	2	1.24225
2016-11-16	3.2	3	-1.24225
2016-11-17	3.25	4	1.55042
2016-11-18	3.29	5	1.22326
2016-11-21	3.29	1	0
2016-11-22	3.35	2	1.80728
2016-11-23	3.35	3	0
2016-11-24	3.35	4	0
2016-11-25	3.35	5	0
2016-11-28	3.33	1	-0.598804
2016-11-29	3.22	2	-3.35909
2016-11-30	3.22	3	0
2016-12-01	3.17	4	-1.56498
2016-12-02	3.22	5	1.56498
2016-12-05	3.39	1	5.14486
2016-12-06	3.4	2	0.294551
2016-12-07	3.38	3	-0.589972
2016-12-08	3.34	4	-1.19049
2016-12-09	3.4	5	1.78046
2016-12-12	3.4	1	0
2016-12-13	3.4	2	0
2016-12-14	3.43	3	0.878483
2016-12-15	3.38	4	-1.46846
2016-12-16	3.37	5	-0.296297
2016-12-19	3.37	1	0
2016-12-20	3.31	2	-1.79646
2016-12-21	3.28	3	-0.910477
2016-12-22	3.28	4	0
2016-12-23	3.28	5	0
2016-12-26	3.28	1	0
2016-12-27	3.38	2	3.00323
2016-12-28	3.32	3	-1.79109
2016-12-29	3.34	4	0.600602
2016-12-30	3.37	5	0.894194
2017-01-02	3.37	1	0
2017-01-03	3.41	2	1.17995
2017-01-04	3.45	3	1.16619
2017-01-05	3.46	4	0.289436
2017-01-06	3.43	5	-0.870833
2017-01-09	3.44	1	0.291121
2017-01-10	3.41	2	-0.875918
2017-01-11	3.4	3	-0.293686
2017-01-12	3.41	4	0.293686
2017-01-13	3.42	5	0.292826
2017-01-16	3.42	1	0
2017-01-17	3.49	2	2.02612
2017-01-18	3.48	3	-0.286944
2017-01-19	3.49	4	0.286944
2017-01-20	3.51	5	0.57143
2017-01-23	3.51	1	0
2017-01-24	3.45	2	-1.72418
2017-01-25	3.48	3	0.865806
2017-01-26	3.46	4	-0.57637
2017-01-27	3.45	5	-0.289436
2017-01-30	3.45	1	0
2017-01-31	3.43	2	-0.581397
2017-02-01	3.51	3	2.30558
2017-02-02	3.5	4	-0.285307
2017-02-03	3.48	5	-0.573067
2017-02-06	3.47	1	-0.28777
2017-02-07	3.52	2	1.43064
2017-02-08	3.54	3	0.566574
2017-02-09	3.51	4	-0.851069
2017-02-10	3.56	5	1.41445
2017-02-13	3.57	1	0.280505
2017-02-14	3.55	2	-0.561799
2017-02-15	3.6	3	1.39862
2017-02-16	3.54	4	-1.68071
2017-02-17	3.49	5	-1.4225
2017-02-20	3.49	1	0
2017-02-21	3.5	2	0.286123
2017-02-22	3.52	3	0.569802
2017-02-23	3.47	4	-1.43064
2017-02-24	3.45	5	-0.578036
2017-02-27	3.42	1	-0.873368
2017-02-28	3.5	2	2.31224
2017-03-01	3.57	3	1.98026
2017-03-02	3.55	4	-0.561799
2017-03-03	3.56	5	0.281294
2017-03-06	3.54	1	-0.563382
2017-03-07	3.53	2	-0.282886
2017-03-08	3.49	3	-1.13961
2017-03-09	3.43	4	-1.73415
2017-03-10	3.44	5	0.291121
2017-03-13	3.34	1	-2.95007
2017-03-14	3.34	2	0
2017-03-15	3.34	3	0
2017-03-16	3.36	4	0.597017
2017-03-17	3.38	5	0.593474
2017-03-20	3.35	1	-0.891536
2017-03-21	3.34	2	-0.298954
2017-03-22	3.32	3	-0.600602
2017-03-23	3.31	4	-0.301659
2017-03-24	3.31	5	0
2017-03-27	3.31	1	0
2017-03-28	3.32	2	0.301659
2017-03-29	3.32	3	0
2017-03-30	3.32	4	0
2017-03-31	3.39	5	2.08651
2017-04-03	3.44	1	1.46415
2017-04-04	3.39	2	-1.46415
2017-04-05	3.41	3	0.588237
2017-04-06	3.38	4	-0.883658
2017-04-07	3.36	5	-0.593474
2017-04-10	3.43	1	2.06193
2017-04-11	3.43	2	0
2017-04-12	3.46	3	0.870833
2017-04-13	3.48	4	0.57637
2017-04-14	3.48	5	0
2017-04-17	3.44	1	-1.15608
2017-04-18	3.4	2	-1.1696
2017-04-19	3.4	3	0
2017-04-20	3.36	4	-1.18345
2017-04-21	3.36	5	0
2017-04-24	3.38	1	0.593474
2017-04-25	3.44	2	1.75958
2017-04-26	3.38	3	-1.75958
2017-04-27	3.42	4	1.17648
2017-04-28	3.38	5	-1.17648
2017-05-01	3.51	1	3.77403
2017-05-02	3.46	2	-1.43474
2017-05-03	3.49	3	0.863315
2017-05-04	3.4	4	-2.61263
2017-05-05	3.45	5	1.45988
2017-05-08	3.4	1	-1.45988
2017-05-09	3.4	2	0
2017-05-10	3.48	3	2.32569
2017-05-11	3.44	4	-1.15608
2017-05-12	3.45	5	0.290276
2017-05-15	3.45	1	0
2017-05-16	3.45	2	0
2017-05-17	3.48	3	0.865806
2017-05-18	3.43	4	-1.4472
2017-05-19	3.49	5	1.73415
2017-05-22	3.52	1	0.855925
2017-05-23	3.47	2	-1.43064
2017-05-24	3.49	3	0.574714
2017-05-25	3.47	4	-0.574714
2017-05-26	3.52	5	1.43064
2017-05-29	3.52	1	0
2017-05-30	3.44	2	-2.29895
2017-05-31	3.49	3	1.44303
2017-06-01	3.47	4	-0.574714
2017-06-02	3.5	5	0.860837
2017-06-05	3.5	1	0
2017-06-06	3.51	2	0.285307
2017-06-07	3.59	3	2.25362
2017-06-08	3.61	4	0.555557
2017-06-09	3.64	5	0.827591
2017-06-12	3.53	1	-3.06858
2017-06-13	3.57	2	1.12677
2017-06-14	3.53	3	-1.12677
2017-06-15	3.56	4	0.846267
2017-06-16	3.61	5	1.39472
2017-06-19	3.51	1	-2.80917
2017-06-20	3.47	2	-1.14614
2017-06-21	3.46	3	-0.2886
2017-06-22	3.41	4	-1.45563
2017-06-23	3.33	5	-2.374
2017-06-26	3.35	1	0.598804
2017-06-27	3.36	2	0.298063
2017-06-28	3.35	3	-0.298063
2017-06-29	3.38	4	0.891536
2017-06-30	3.51	5	3.77403
2017-07-03	3.56	1	1.41445
2017-07-04	3.56	2	0
2017-07-05	3.59	3	0.839166
2017-07-06	3.57	4	-0.558661
2017-07-07	3.6	5	0.836825
2017-07-10	3.69	1	2.46926
2017-07-11	3.67	2	-0.54348
2017-07-12	3.67	3	0
2017-07-13	3.37	4	-8.52789
2017-07-14	3.43	5	1.76475
2017-07-17	3.43	1	0
2017-07-18	3.45	2	0.581397
2017-07-19	3.45	3	0
2017-07-20	3.59	4	3.9778
2017-07-21	3.5	5	-2.53892
2017-07-24	3.47	1	-0.860837
2017-07-25	3.39	2	-2.33247
2017-07-26	3.39	3	0
2017-07-27	3.44	4	1.46415
2017-07-28	3.44	5	0
2017-07-31	3.41	1	-0.875918
2017-08-01	3.33	2	-2.374
2017-08-02	3.35	3	0.598804
2017-08-03	3.34	4	-0.298954
2017-08-04	3.38	5	1.19049
2017-08-07	3.44	1	1.75958
2017-08-08	3.42	2	-0.583092
2017-08-09	3.44	3	0.583092
2017-08-10	3.3	4	-4.1549
2017-08-11	3.34	5	1.20483
2017-08-14	3.36	1	0.597017
2017-08-15	3.28	2	-2.40976
2017-08-16	3.27	3	-0.305344
2017-08-17	3.26	4	-0.306279
2017-08-18	3.27	5	0.306279
2017-08-21	3.24	1	-0.921666
2017-08-22	3.21	2	-0.930239
2017-08-23	3.18	3	-0.938974
2017-08-24	3.2	4	0.626961
2017-08-25	3.16	5	-1.25788
2017-08-28	3.1	1	-1.91699
2017-08-29	3.11	2	0.322061
2017-08-30	3.08	3	-0.969313
2017-08-31	3.2	4	3.82212
2017-09-01	3.17	5	-0.941922
2017-09-04	3.17	1	0
2017-09-05	3.23	2	1.87505
2017-09-06	3.24	3	0.309119
2017-09-07	3.16	4	-2.50013
2017-09-08	3.18	5	0.630917
2017-09-11	3.19	1	0.313972
2017-09-12	3.14	2	-1.57981
2017-09-13	3.14	3	0
2017-09-14	3.13	4	-0.31898
2017-09-15	3.11	5	-0.641028
2017-09-18	3.06	1	-1.62078
2017-09-19	3.11	2	1.62078
2017-09-20	3.12	3	0.321028
2017-09-21	3.12	4	0
2017-09-22	3.17	5	1.58986
2017-09-25	3.17	1	0
2017-09-26	3.15	2	-0.632914
2017-09-27	3.18	3	0.947874
2017-09-28	3.17	4	-0.314961
2017-09-29	3.19	5	0.628933
2017-10-02	3.17	1	-0.628933
2017-10-03	3.15	2	-0.632914
2017-10-04	3.13	3	-0.636945
2017-10-05	3.14	4	0.31898
2017-10-06	3.14	5	0
2017-10-09	3.14	1	0
2017-10-10	3.14	2	0
2017-10-11	3.11	3	-0.960007
2017-10-12	3.13	4	0.641028
2017-10-13	3.16	5	0.953902
2017-10-16	3.16	1	0
2017-10-17	3.15	2	-0.316957
2017-10-18	3.14	3	-0.317965
2017-10-19	3.14	4	0
2017-10-20	3.11	5	-0.960007
2017-10-23	3.18	1	2.22585
2017-10-24	3.19	2	0.313972
2017-10-25	3.19	3	0
2017-10-26	3.17	4	-0.628933
2017-10-27	3.15	5	-0.632914
2017-10-30	3.16	1	0.316957
2017-10-31	3.13	2	-0.953902
2017-11-01	3.15	3	0.636945
2017-11-02	3.18	4	0.947874
2017-11-03	3.15	5	-0.947874
2017-11-06	3.15	1	0
2017-11-07	3.17	2	0.632914
2017-11-08	3.17	3	0
2017-11-09	3.12	4	-1.58986
2017-11-10	3.1	5	-0.643089
2017-11-13	3.1	1	0
2017-11-14	3.1	2	0
2017-11-15	3.1	3	0
2017-11-16	3.1	4	0
2017-11-17	3.17	5	2.23295
2017-11-20	3.19	1	0.628933
2017-11-21	3.19	2	0
2017-11-22	3.19	3	0
2017-11-23	3.19	4	0
2017-11-24	3.19	5	0
2017-11-27	3.13	1	-1.89879
2017-11-28	3.1	2	-0.963089
2017-11-29	3.12	3	0.643089
2017-11-30	3.14	4	0.63898
2017-12-01	3.27	5	4.05672
2017-12-04	3.2	1	-2.16392
2017-12-05	3.21	2	0.312013
2017-12-06	3.21	3	0
2017-12-07	3.2	4	-0.312013
2017-12-08	3.21	5	0.312013
2017-12-11	3.17	1	-1.25393
2017-12-12	3.16	2	-0.315956
2017-12-13	3.18	3	0.630917
2017-12-14	3.17	4	-0.314961
2017-12-15	3.16	5	-0.315956
2017-12-18	3.19	1	0.944889
2017-12-19	3.19	2	0
2017-12-20	3.2	3	0.312989
2017-12-21	3.22	4	0.623055
2017-12-22	3.22	5	0
2017-12-25	3.22	1	0
2017-12-26	3.24	2	0.619197
2017-12-27	3.25	3	0.308167
2017-12-28	3.23	4	-0.617286
2017-12-29	3.23	5	0
2018-01-01	3.23	1	0
2018-01-02	3.27	2	1.23078
2018-01-03	3.27	3	0
2018-01-04	3.25	4	-0.613499
2018-01-05	3.25	5	0
2018-01-08	3.21	1	-1.23841
2018-01-09	3.23	2	0.62112
2018-01-10	3.25	3	0.617286
2018-01-11	3.25	4	0
2018-01-12	3.21	5	-1.23841
2018-01-15	3.21	1	0
2018-01-16	3.23	2	0.62112
2018-01-17	3.28	3	1.53613
2018-01-18	3.27	4	-0.305344
2018-01-19	3.3	5	0.913248
2018-01-22	3.3	1	0
2018-01-23	3.29	2	-0.30349
2018-01-24	3.35	3	1.80728
2018-01-25	3.33	4	-0.598804
2018-01-26	3.34	5	0.29985
2018-01-29	3.37	1	0.894194
2018-01-30	3.42	2	1.47278
2018-01-31	3.42	3	0
2018-02-01	3.41	4	-0.292826
2018-02-02	3.4	5	-0.293686
2018-02-05	3.37	1	-0.886269
2018-02-06	3.41	2	1.17995
2018-02-07	3.43	3	0.584797
2018-02-08	3.44	4	0.291121
2018-02-09	3.38	5	-1.75958
2018-02-12	3.45	1	2.04985
2018-02-13	3.46	2	0.289436
2018-02-14	3.52	3	1.71924
2018-02-15	3.46	4	-1.71924
2018-02-16	3.46	5	0
2018-02-19	3.46	1	0
2018-02-20	3.44	2	-0.579712
2018-02-21	3.44	3	0
2018-02-22	3.45	4	0.290276
2018-02-23	3.45	5	0
2018-02-26	3.47	1	0.578036
2018-02-27	3.55	2	2.2793
2018-02-28	3.55	3	0
2018-03-01	3.59	4	1.12046
2018-03-02	3.58	5	-0.27894
2018-03-05	3.6	1	0.557105
2018-03-06	3.61	2	0.277393
2018-03-07	3.59	3	-0.555557
2018-03-08	3.66	4	1.93109
2018-03-09	3.63	5	-0.82305
2018-03-12	3.61	1	-0.552488
2018-03-13	3.58	2	-0.834497
2018-03-14	3.55	3	-0.84152
2018-03-15	3.52	4	-0.848661
2018-03-16	3.52	5	0
2018-03-19	3.44	1	-2.29895
2018-03-20	3.41	2	-0.875918
2018-03-21	3.41	3	0
2018-03-22	3.41	4	0
2018-03-23	3.42	5	0.292826
2018-03-26	3.42	1	0
2018-03-27	3.39	2	-0.881063
2018-03-28	3.4	3	0.294551
2018-03-29	3.52	4	3.46856
2018-03-30	3.52	5	0
2018-04-02	3.49	1	-0.855925
2018-04-03	3.5	2	0.286123
2018-04-04	3.45	3	-1.43887
2018-04-05	3.58	4	3.69886
2018-04-06	3.56	5	-0.560226
2018-04-09	3.58	1	0.560226
2018-04-10	3.57	2	-0.27972
2018-04-11	3.54	3	-0.843887
2018-04-12	3.54	4	0
2018-04-13	3.5	5	-1.13638
2018-04-16	3.47	1	-0.860837
2018-04-17	3.46	2	-0.2886
2018-04-18	3.54	3	2.28581
2018-04-19	3.53	4	-0.282886
2018-04-20	3.47	5	-1.71433
2018-04-23	3.49	1	0.574714
2018-04-24	3.54	2	1.4225
2018-04-25	3.59	3	1.40255
2018-04-26	3.59	4	0
2018-04-27	3.63	5	1.10804
2018-04-30	3.65	1	0.549452
2018-05-01	3.75	2	2.70287
2018-05-02	3.75	3	0
2018-05-03	3.78	4	0.796817
2018-05-04	3.77	5	-0.264901
2018-05-07	3.72	1	-1.33513
2018-05-08	3.75	2	0.803217
2018-05-09	3.75	3	0
2018-05-10	3.73	4	-0.534761
2018-05-11	3.68	5	-1.34955
2018-05-14	3.68	1	0
2018-05-15	3.74	2	1.61729
2018-05-16	3.71	3	-0.805373
2018-05-17	3.66	4	-1.35687
2018-05-18	3.74	5	2.16225
2018-05-21	3.73	1	-0.267738
2018-05-22	3.74	2	0.267738
2018-05-23	3.77	3	0.798939
2018-05-24	3.73	4	-1.06668
2018-05-25	3.76	5	0.801072
2018-05-28	3.76	1	0
2018-05-29	3.72	2	-1.06953
2018-05-30	3.66	3	-1.62605
2018-05-31	3.66	4	0
2018-06-01	3.63	5	-0.82305
2018-06-04	3.5	1	-3.64697
2018-06-05	3.53	2	0.85349
2018-06-06	3.47	3	-1.71433
2018-06-07	3.43	4	-1.15943
2018-06-08	3.45	5	0.581397
2018-06-11	3.34	1	-3.24034
2018-06-12	3.45	2	3.24034
2018-06-13	3.45	3	0
2018-06-14	3.33	4	-3.54019
2018-06-15	3.32	5	-0.300752
2018-06-18	3.28	1	-1.21214
2018-06-19	3.26	2	-0.611623
2018-06-20	3.29	3	0.916037
2018-06-21	3.32	4	0.907722
2018-06-22	3.32	5	0
2018-06-25	3.27	1	-1.51748
2018-06-26	3.3	2	0.913248
2018-06-27	3.28	3	-0.607905
2018-06-28	3.21	4	-2.15725
2018-06-29	3.26	5	1.54563
2018-07-02	3.14	1	-3.75044
2018-07-03	3.18	2	1.26584
2018-07-04	3.18	3	0
2018-07-05	3.19	4	0.313972
2018-07-06	3.27	5	2.47691
2018-07-09	3.21	1	-1.8519
2018-07-10	3.14	2	-2.20481
2018-07-11	3.09	3	-1.60517
2018-07-12	3.15	4	1.92314
2018-07-13	3.1	5	-1.60003
2018-07-16	3.1	1	0
2018-07-17	3.16	2	1.91699
2018-07-18	3.17	3	0.315956
2018-07-19	3.2	4	0.941922
2018-07-20	3.24	5	1.24225
2018-07-23	3.28	1	1.22701
2018-07-24	3.24	2	-1.22701
2018-07-25	3.3	3	1.83491
2018-07-26	3.32	4	0.604231
2018-07-27	3.31	5	-0.301659
2018-07-30	3.35	1	1.20122
2018-07-31	3.39	2	1.18696
2018-08-01	3.32	3	-2.08651
2018-08-02	3.33	4	0.300752
2018-08-03	3.33	5	0
2018-08-06	3.34	1	0.29985
2018-08-07	3.33	2	-0.29985
2018-08-08	3.35	3	0.598804
2018-08-09	3.33	4	-0.598804
2018-08-10	3.22	5	-3.35909
2018-08-13	3.21	1	-0.311042
2018-08-14	3.29	2	2.46166
2018-08-15	3.3	3	0.30349
2018-08-16	3.34	4	1.20483
2018-08-17	3.33	5	-0.29985
2018-08-20	3.31	1	-0.602411
2018-08-21	3.3	2	-0.302572
2018-08-22	3.21	3	-2.76515
2018-08-23	3.11	4	-3.16482
2018-08-24	3.11	5	0
2018-08-27	3.1	1	-0.322061
2018-08-28	3.03	2	-2.28395
2018-08-29	3.02	3	-0.330579
2018-08-30	3.03	4	0.330579
[truncated: 931 more rows]

## Sheet: Cotton
2010-12-31	134.42
2011-01-03	134.82	1	0.297133
2011-01-04	134.82	2	0
2011-01-05	136.13	3	0.966976
2011-01-06	137.68	4	1.13218
2011-01-07	134.41	5	-2.40373
2011-01-10	133.96	1	-0.335358
2011-01-11	136.57	2	1.92961
2011-01-12	140.57	3	2.88683
2011-01-13	141.05	4	0.340885
2011-01-14	137.11	5	-2.83309
2011-01-17	134.53	1	-1.89963
2011-01-18	134.53	2	0
2011-01-19	138.56	3	2.95162
2011-01-20	142.06	4	2.49461
2011-01-21	145.49	5	2.38579
2011-01-24	149.49	1	2.71221
2011-01-25	154.49	2	3.28999
2011-01-26	153.81	3	-0.441129
2011-01-27	158.09	4	2.74464
2011-01-28	160.64	5	1.60013
2011-01-31	156.32	1	-2.72606
2011-02-01	160.1	2	2.38934
2011-02-02	163.87	3	2.32748
2011-02-03	167.87	4	2.41164
2011-02-04	164.19	5	-2.21656
2011-02-07	160.19	1	-2.46637
2011-02-08	166.79	2	4.03749
2011-02-09	167.67	3	0.526223
2011-02-10	172.91	4	3.07735
2011-02-11	179.91	5	3.96855
2011-02-14	182.34	1	1.34164
2011-02-15	179.61	2	-1.50852
2011-02-16	184.38	3	2.6211
2011-02-17	191.38	4	3.72621
2011-02-18	198.38	5	3.59234
2011-02-21	191.38	1	-3.59234
2011-02-22	191.38	2	0
2011-02-23	184.38	3	-3.72621
2011-02-24	184.38	4	0
2011-02-25	172.66	5	-6.56745
2011-02-28	179.81	1	4.05764
2011-03-01	186.81	2	3.81913
2011-03-02	189.21	3	1.27655
2011-03-03	196.21	4	3.6328
2011-03-04	201.36	5	2.59088
2011-03-07	208.36	1	3.4173
2011-03-08	209.6	2	0.59336
2011-03-09	202.6	3	-3.39674
2011-03-10	199.44	4	-1.57202
2011-03-11	195.77	5	-1.85729
2011-03-14	199.74	1	2.0076
2011-03-15	192.74	2	-3.56744
2011-03-16	185.74	3	-3.69943
2011-03-17	179.94	4	-3.17244
2011-03-18	186.94	5	3.81642
2011-03-21	193.94	1	3.67611
2011-03-22	193.83	2	-0.0567347
2011-03-23	200.83	3	3.54773
2011-03-24	196.84	4	-2.00676
2011-03-25	203.87	5	3.50913
2011-03-28	199.56	1	-2.13676
2011-03-29	192.56	2	-3.57071
2011-03-30	189.91	3	-1.38575
2011-03-31	188.84	4	-0.565018
2011-04-01	195.38	5	3.40463
2011-04-04	190.75	1	-2.39827
2011-04-05	190.75	2	0
2011-04-06	196.26	3	2.84766
2011-04-07	203.26	4	3.50456
2011-04-08	203.37	5	0.0541032
2011-04-11	198.12	1	-2.61541
2011-04-12	198.12	2	0
2011-04-13	194.88	3	-1.64889
2011-04-14	192.46	4	-1.24956
2011-04-15	190.39	5	-1.08137
2011-04-18	180.29	1	-5.45079
2011-04-19	181.04	2	0.415134
2011-04-20	174.04	3	-3.94328
2011-04-21	169.97	4	-2.36632
2011-04-22	170.44	5	0.276138
2011-04-25	170.44	1	0
2011-04-26	169.28	2	-0.682918
2011-04-27	163.28	3	-3.60876
2011-04-28	156.28	4	-4.38172
2011-04-29	154.94	5	-0.861132
2011-05-02	160.09	1	3.26982
2011-05-03	156.54	2	-2.24246
2011-05-04	159.58	3	1.92338
2011-05-05	153.58	4	-3.83238
2011-05-06	146.76	5	-4.5423
2011-05-09	145.47	1	-0.882872
2011-05-10	145.36	2	-0.0756456
2011-05-11	150.29	3	3.33533
2011-05-12	149.21	4	-0.721205
2011-05-13	143.21	5	-4.10426
2011-05-16	144.04	1	0.577895
2011-05-17	150.04	2	4.08109
2011-05-18	154.31	3	2.80616
2011-05-19	159.11	4	3.06322
2011-05-20	154.89	5	-2.68806
2011-05-23	154.86	1	-0.0193705
2011-05-24	153.42	2	-0.934222
2011-05-25	153.41	3	-0.00651827
2011-05-26	155.52	4	1.36603
2011-05-27	150.52	5	-3.26784
2011-05-30	152.19	1	1.10338
2011-05-31	152.19	2	0
2011-06-01	158.19	3	3.86671
2011-06-02	160.48	4	1.43725
2011-06-03	163.74	5	2.01105
2011-06-06	161.16	1	-1.58821
2011-06-07	155.16	2	-3.79408
2011-06-08	148.16	3	-4.61641
2011-06-09	144.61	4	-2.42523
2011-06-10	150.61	5	4.06533
2011-06-13	149.59	1	-0.67955
2011-06-14	150.54	2	0.633061
2011-06-15	155.1	3	2.98412
2011-06-16	151.47	4	-2.36825
2011-06-17	145.47	5	-4.04177
2011-06-20	136.22	1	-6.56987
2011-06-21	135.99	2	-0.168987
2011-06-22	135.99	3	0
2011-06-23	134.94	4	-0.775112
2011-06-24	132.21	5	-2.04387
2011-06-27	134.66	1	1.83615
2011-06-28	135.67	2	0.747238
2011-06-29	135.72	3	0.0368473
2011-06-30	134.96	4	-0.56155
2011-07-01	131.42	5	-2.65801
2011-07-04	131.42	1	0
2011-07-05	129.58	2	-1.40999
2011-07-06	126.75	3	-2.20818
2011-07-07	124.77	4	-1.57446
2011-07-08	124	5	-0.619048
2011-07-11	124.34	1	0.273818
2011-07-12	119.2	2	-4.2217
2011-07-13	114.06	3	-4.40781
2011-07-14	117.82	4	3.24334
2011-07-15	113.82	5	-3.45398
2011-07-18	108.9	1	-4.41882
2011-07-19	104.25	2	-4.36382
2011-07-20	108.25	3	3.76515
2011-07-21	107.21	4	-0.965384
2011-07-22	107.21	5	0
2011-07-25	105.03	1	-2.05435
2011-07-26	102.99	2	-1.96141
2011-07-27	106.99	3	3.81035
2011-07-28	106.75	4	-0.224572
2011-07-29	105.72	5	-0.969556
2011-08-01	104.99	1	-0.692898
2011-08-02	108.49	2	3.27929
2011-08-03	110.05	3	1.42768
2011-08-04	105.16	4	-4.54518
2011-08-05	105.58	5	0.398596
2011-08-08	102.06	1	-3.39081
2011-08-09	99.58	2	-2.45995
2011-08-10	97.83	3	-1.77301
2011-08-11	99.76	4	1.9536
2011-08-12	96.42	5	-3.40537
2011-08-15	99.37	1	3.01366
2011-08-16	103.45	2	4.02381
2011-08-17	103.01	3	-0.426233
2011-08-18	106.66	4	3.48201
2011-08-19	105.18	5	-1.3973
2011-08-22	104.4	1	-0.744349
2011-08-23	104.29	2	-0.10542
2011-08-24	104.29	3	0
2011-08-25	102.23	4	-1.99503
2011-08-26	100.21	5	-1.99572
2011-08-29	101.51	1	1.28893
2011-08-30	102.34	2	0.814329
2011-08-31	102.51	3	0.165975
2011-09-01	103.49	4	0.951463
2011-09-02	103.7	5	0.202713
2011-09-05	104.06	1	0.346554
2011-09-06	104.06	2	0
2011-09-07	103.67	3	-0.375488
2011-09-08	107.67	4	3.78582
2011-09-09	109.46	5	1.64882
2011-09-12	107.36	1	-1.93715
2011-09-13	107.66	2	0.279044
2011-09-14	108.4	3	0.684998
2011-09-15	110.14	4	1.59242
2011-09-16	107.34	5	-2.57509
2011-09-19	105.84	1	-1.40728
2011-09-20	100.59	2	-5.08757
2011-09-21	100.51	3	-0.0795624
2011-09-22	97.95	4	-2.58001
2011-09-23	94.42	5	-3.67042
2011-09-26	96.39	1	2.06495
2011-09-27	94.81	2	-1.65276
2011-09-28	95.32	3	0.536476
2011-09-29	94.88	4	-0.462672
2011-09-30	97.66	5	2.88791
2011-10-03	95.64	1	-2.09009
2011-10-04	94.65	2	-1.04053
2011-10-05	97.34	3	2.80241
2011-10-06	97.82	4	0.491905
2011-10-07	98.63	5	0.824642
2011-10-10	98.09	1	-0.549005
2011-10-11	98.09	2	0
2011-10-12	99.51	3	1.43727
2011-10-13	96.26	4	-3.32053
2011-10-14	97.22	5	0.992359
2011-10-17	97.71	1	0.502746
2011-10-18	96.9	2	-0.832439
2011-10-19	97.02	3	0.123762
2011-10-20	96.8	4	-0.227015
2011-10-21	94.19	5	-2.7333
2011-10-24	94.54	1	0.370901
2011-10-25	95.46	2	0.968429
2011-10-26	97.2	3	1.80634
2011-10-27	97.84	4	0.656278
2011-10-28	101.84	5	4.00695
2011-10-31	101.87	1	0.0294536
2011-11-01	99.99	2	-1.86273
2011-11-02	97.24	3	-2.7888
2011-11-03	95.96	4	-1.32507
2011-11-04	95.73	5	-0.239971
2011-11-07	96.31	1	0.604043
2011-11-08	94.33	2	-2.07729
2011-11-09	94.8	3	0.497014
2011-11-10	94.8	4	0
2011-11-11	96.89	5	2.18069
2011-11-14	96.89	1	0
2011-11-15	98.14	2	1.28187
2011-11-16	99.26	3	1.13476
2011-11-17	98.2	4	-1.07365
2011-11-18	94.2	5	-4.1586
2011-11-21	90.98	1	-3.47805
2011-11-22	88.15	2	-3.15998
2011-11-23	88.73	3	0.655814
2011-11-24	88.58	4	-0.169195
2011-11-25	88.58	5	0
2011-11-28	88.62	1	0.0451467
2011-11-29	89.11	2	0.5514
2011-11-30	90.32	3	1.34874
2011-12-01	88.79	4	-1.70849
2011-12-02	89.21	5	0.471911
2011-12-05	89.31	1	0.112032
2011-12-06	89.66	2	0.391128
2011-12-07	89.66	3	0
2011-12-08	89.72	4	0.0668971
2011-12-09	89.25	5	-0.525229
2011-12-12	87.66	1	-1.79757
2011-12-13	84.4	2	-3.78983
2011-12-14	84.29	3	-0.130417
2011-12-15	81.94	4	-2.8276
2011-12-16	83.06	5	1.3576
2011-12-19	83.06	1	0
2011-12-20	83.64	2	0.695864
2011-12-21	83.29	3	-0.419338
2011-12-22	83.35	4	0.0720115
2011-12-23	83.42	5	0.083948
2011-12-26	83.42	1	0
2011-12-27	83.42	2	0
2011-12-28	83.42	3	0
2011-12-29	86.81	4	3.98337
2011-12-30	87.34	5	0.608673
2012-01-02	87.57	1	0.262993
2012-01-03	87.57	2	0
2012-01-04	91.21	3	4.07261
2012-01-05	91.26	4	0.0548035
2012-01-06	90.06	5	-1.32365
2012-01-09	89.94	1	-0.133333
2012-01-10	90.28	2	0.377317
2012-01-11	90.72	3	0.486189
2012-01-12	90.26	4	-0.508345
2012-01-13	89.06	5	-1.33841
2012-01-16	89.06	1	0
2012-01-17	89.06	2	0
2012-01-18	91.35	3	2.5388
2012-01-19	90.66	4	-0.758204
2012-01-20	90.91	5	0.275376
2012-01-23	91.21	1	0.329453
2012-01-24	91.94	2	0.797165
2012-01-25	90.81	3	-1.23668
2012-01-26	89.34	4	-1.63201
2012-01-27	88.03	5	-1.47717
2012-01-30	88.26	1	0.260934
2012-01-31	86.79	2	-1.67956
2012-02-01	85.86	3	-1.07733
2012-02-02	87.39	4	1.76628
2012-02-03	86.72	5	-0.769632
2012-02-06	88.92	1	2.50526
2012-02-07	89.08	2	0.179775
2012-02-08	87.37	3	-1.93829
2012-02-09	86.41	4	-1.10486
2012-02-10	83.09	5	-3.91791
2012-02-13	83.33	1	0.288427
2012-02-14	84.26	2	1.10986
2012-02-15	84.86	3	0.709558
2012-02-16	85.54	4	0.798126
2012-02-17	86.19	5	0.757006
2012-02-20	85.29	1	-1.04969
2012-02-21	85.29	2	0
2012-02-22	85.73	3	0.514561
2012-02-23	83.41	4	-2.74346
2012-02-24	82.06	5	-1.63175
2012-02-27	83	1	1.13899
2012-02-28	83.51	2	0.612578
2012-02-29	85.03	3	1.80378
2012-03-01	83.74	4	-1.52874
2012-03-02	82.98	5	-0.911715
2012-03-05	81.52	1	-1.77512
2012-03-06	85.52	2	4.79019
2012-03-07	84.66	3	-1.0107
2012-03-08	83.37	4	-1.53547
2012-03-09	83.37	5	0
2012-03-12	82.21	1	-1.40116
2012-03-13	81.43	2	-0.953319
2012-03-14	81.46	3	0.0368347
2012-03-15	80.53	4	-1.14823
2012-03-16	80.67	5	0.173697
2012-03-19	80.77	1	0.123885
2012-03-20	82.13	2	1.66977
2012-03-21	81.07	3	-1.29904
2012-03-22	81.54	4	0.578072
2012-03-23	82.91	5	1.6662
2012-03-26	82.95	1	0.0482335
2012-03-27	84.22	2	1.51944
2012-03-28	85.85	3	1.91692
2012-03-29	87.16	4	1.51439
2012-03-30	86.67	5	-0.563771
2012-04-02	86.51	1	-0.184779
2012-04-03	86.09	2	-0.486675
2012-04-04	85.6	3	-0.570798
2012-04-05	82.3	4	-3.93142
2012-04-06	81.53	5	-0.940006
2012-04-09	81.53	1	0
2012-04-10	82.49	2	1.1706
2012-04-11	82.7	3	0.254253
2012-04-12	84.38	4	2.01108
2012-04-13	85.96	5	1.85517
2012-04-16	85.02	1	-1.09955
2012-04-17	81.02	2	-4.81905
2012-04-18	82.34	3	1.6161
2012-04-19	84.84	4	2.99101
2012-04-20	84.41	5	-0.508125
2012-04-23	82.92	1	-1.78096
2012-04-24	84.02	2	1.31786
2012-04-25	84.02	3	0
2012-04-26	82.11	4	-2.29951
2012-04-27	83.4	5	1.55885
2012-04-30	82.56	1	-1.0123
2012-05-01	80.68	2	-2.30346
2012-05-02	80.95	3	0.334097
2012-05-03	80.83	4	-0.14835
2012-05-04	81.19	5	0.44439
2012-05-07	80.17	1	-1.26427
2012-05-08	79.01	2	-1.4575
2012-05-09	78.66	3	-0.443966
2012-05-10	78.41	4	-0.31833
2012-05-11	74.41	5	-5.23611
2012-05-14	71.59	1	-3.86349
2012-05-15	71.48	2	-0.153771
2012-05-16	71.83	3	0.488453
2012-05-17	69.69	4	-3.02454
2012-05-18	69.39	5	-0.431407
2012-05-21	70.78	1	1.98337
2012-05-22	70.73	2	-0.0706664
2012-05-23	68.16	3	-3.70119
2012-05-24	65.44	4	-4.07242
2012-05-25	67.89	5	3.67551
2012-05-28	67.59	1	-0.442871
2012-05-29	67.59	2	0
2012-05-30	66.79	3	-1.19067
2012-05-31	64.86	4	-2.93223
2012-06-01	65.32	5	0.706717
2012-06-04	62.35	1	-4.65346
2012-06-05	62.35	2	0
2012-06-06	60.71	3	-2.66552
2012-06-07	63.71	4	4.82331
2012-06-08	67.64	5	5.9858
2012-06-11	66.64	1	-1.48945
2012-06-12	68.85	2	3.26252
2012-06-13	69.34	3	0.709172
2012-06-14	68.85	4	-0.709172
2012-06-15	71.85	5	4.26504
2012-06-18	73.63	1	2.44719
2012-06-19	70.12	2	-4.88445
2012-06-20	72.25	3	2.99243
2012-06-21	69.96	4	-3.22087
2012-06-22	65.46	5	-6.64844
2012-06-25	67.5	1	3.06883
2012-06-26	68.72	2	1.79127
2012-06-27	65.75	3	-4.41806
2012-06-28	65.22	4	-0.80935
2012-06-29	65.94	5	1.09791
2012-07-02	67.55	1	2.41228
2012-07-03	68.07	2	0.766852
2012-07-04	68.5	3	0.629716
2012-07-05	68.5	4	0
2012-07-06	68.5	5	0
2012-07-09	65.31	1	-4.76886
2012-07-10	65.19	2	-0.183908
2012-07-11	64.94	3	-0.384232
2012-07-12	65.49	4	0.843369
2012-07-13	64.36	5	-1.74051
2012-07-16	66.79	1	3.7061
2012-07-17	67.39	2	0.894327
2012-07-18	65.19	3	-3.31906
2012-07-19	66.14	4	1.44676
2012-07-20	66.89	5	1.12758
2012-07-23	67.08	1	0.283646
2012-07-24	66.57	2	-0.763191
2012-07-25	65.81	3	-1.14822
2012-07-26	64.61	4	-1.84026
2012-07-27	66.16	5	2.37069
2012-07-30	66.2	1	0.0604412
2012-07-31	66.19	2	-0.0151069
2012-08-01	66.31	3	0.181132
2012-08-02	65.79	4	-0.787286
2012-08-03	66.14	5	0.530586
2012-08-06	68.91	1	4.10276
2012-08-07	70.87	2	2.80459
2012-08-08	70.76	3	-0.155334
2012-08-09	71.36	4	0.844362
2012-08-10	71.42	5	0.0840454
2012-08-13	68.71	1	-3.86832
2012-08-14	67.14	2	-2.31148
2012-08-15	67.42	3	0.416172
2012-08-16	68.51	4	1.6038
2012-08-17	68.12	5	-0.570886
2012-08-20	68.4	1	0.410197
2012-08-21	69.91	2	2.18359
2012-08-22	72.29	3	3.34771
2012-08-23	72.01	4	-0.388081
2012-08-24	71.89	5	-0.166783
2012-08-27	70.43	1	-2.05179
2012-08-28	71.34	2	1.28379
2012-08-29	70.96	3	-0.534084
2012-08-30	71.99	4	1.44109
2012-08-31	72.29	5	0.415859
2012-09-03	72.59	1	0.414136
2012-09-04	72.59	2	0
2012-09-05	71.13	3	-2.0318
2012-09-06	70.96	4	-0.239285
2012-09-07	71.67	5	0.995591
2012-09-10	71.76	1	0.125497
2012-09-11	71.06	2	-0.980263
2012-09-12	70.34	3	-1.0184
2012-09-13	68.84	4	-2.15557
2012-09-14	68.93	5	0.130653
2012-09-17	71.39	1	3.50663
2012-09-18	70.13	2	-1.78071
2012-09-19	70.84	3	1.00732
2012-09-20	71.19	4	0.492855
2012-09-21	69.98	5	-1.71429
2012-09-24	68	1	-2.87018
2012-09-25	67.25	2	-1.10907
2012-09-26	67.13	3	-0.178598
2012-09-27	65.84	4	-1.94035
2012-09-28	66.34	5	0.756548
2012-10-01	65.43	1	-1.38122
2012-10-02	65.96	2	0.806763
2012-10-03	66.57	3	0.920553
2012-10-04	66.86	4	0.434686
2012-10-05	66.92	5	0.0896995
2012-10-08	66.35	1	-0.855412
2012-10-09	66.35	2	0
2012-10-10	66.74	3	0.586071
2012-10-11	66.93	4	0.284282
2012-10-12	66.93	5	0
2012-10-15	66.22	1	-1.06648
2012-10-16	67.35	2	1.69204
2012-10-17	69.97	3	3.81637
2012-10-18	72.97	4	4.19818
2012-10-19	72.73	5	-0.329444
2012-10-22	71.91	1	-1.13386
2012-10-23	71.95	2	0.0556096
2012-10-24	69.48	3	-3.49325
2012-10-25	67.91	4	-2.28556
2012-10-26	67.95	5	0.0588841
2012-10-29	67.73	1	-0.324293
2012-10-30	67.94	2	0.309575
2012-10-31	66.51	3	-2.12727
2012-11-01	65.66	4	-1.28624
2012-11-02	65.83	5	0.258575
2012-11-05	66	1	0.257908
2012-11-06	66.04	2	0.0605877
2012-11-07	66.14	3	0.151309
2012-11-08	65.66	4	-0.72838
2012-11-09	65.11	5	-0.841176
2012-11-12	65.41	1	0.4597
2012-11-13	65.41	2	0
2012-11-14	66.97	3	2.35696
2012-11-15	67.63	4	0.980691
2012-11-16	69.54	5	2.78505
2012-11-19	68.31	1	-1.7846
2012-11-20	67.69	2	-0.911771
2012-11-21	68.1	3	0.603875
2012-11-22	68.22	4	0.176056
2012-11-23	68.22	5	0
2012-11-26	67.13	1	-1.61067
2012-11-27	68.34	2	1.78642
2012-11-28	68.26	3	-0.11713
2012-11-29	68.34	4	0.11713
2012-11-30	69.11	5	1.12042
2012-12-03	69.65	1	0.778326
2012-12-04	69.7	2	0.0717618
2012-12-05	68.65	3	-1.51792
2012-12-06	68.65	4	0
2012-12-07	68.74	5	0.131014
2012-12-10	69.39	1	0.941149
2012-12-11	69.11	2	-0.404333
2012-12-12	70.46	3	1.93457
2012-12-13	70.69	4	0.325895
2012-12-14	70.29	5	-0.567458
2012-12-17	70.67	1	0.539161
2012-12-18	71.43	2	1.06968
2012-12-19	71.5	3	0.0979501
2012-12-20	71.42	4	-0.111951
2012-12-21	71.38	5	-0.0560224
2012-12-24	71.7	1	0.447303
2012-12-25	71.7	2	0
2012-12-26	71.7	3	0
2012-12-27	72.54	4	1.16474
2012-12-28	71.76	5	-1.08109
2012-12-31	70.65	1	-1.55891
2013-01-01	70.65	2	0
2013-01-02	70.65	3	0
2013-01-03	71.08	4	0.606789
2013-01-04	71.1	5	0.0281334
2013-01-07	70.79	1	-0.436959
2013-01-08	71.4	2	0.858012
2013-01-09	70.8	3	-0.843887
2013-01-10	70.49	4	-0.438814
2013-01-11	70.86	5	0.523524
2013-01-14	70.86	1	0
2013-01-15	70.94	2	0.112835
2013-01-16	70.94	3	0
2013-01-17	72.81	4	2.60189
2013-01-18	73.13	5	0.438537
2013-01-21	73.13	1	0
2013-01-22	73.13	2	0
2013-01-23	74.77	3	2.21781
2013-01-24	75.13	4	0.480321
2013-01-25	77.42	5	3.00252
2013-01-28	75.16	1	-2.9626
2013-01-29	75.68	2	0.689475
2013-01-30	76.99	3	1.71616
2013-01-31	77.54	4	0.711839
2013-02-01	77.43	5	-0.141963
2013-02-04	77.45	1	0.0258264
2013-02-05	76.21	2	-1.61399
2013-02-06	76.04	3	-0.223317
2013-02-07	76.19	4	0.19707
2013-02-08	75.93	5	-0.341836
2013-02-11	77.19	1	1.64581
2013-02-12	77.44	2	0.323353
2013-02-13	76.36	3	-1.40444
2013-02-14	75.37	4	-1.30497
2013-02-15	76.24	5	1.14769
2013-02-18	76.67	1	0.562424
2013-02-19	76.67	2	0
2013-02-20	77.63	3	1.24435
2013-02-21	78.01	4	0.488307
2013-02-22	76.91	5	-1.42011
2013-02-25	77.21	1	0.389308
2013-02-26	75.76	2	-1.89585
2013-02-27	75.84	3	0.105541
2013-02-28	78.52	4	3.47275
2013-03-01	79.53	5	1.27809
2013-03-04	79.61	1	0.10054
2013-03-05	80.36	2	0.937683
2013-03-06	81.09	3	0.904311
2013-03-07	81.46	4	0.455245
2013-03-08	80.89	5	-0.70219
2013-03-11	81.45	1	0.689913
2013-03-12	81.26	2	-0.233544
2013-03-13	81.91	3	0.796719
2013-03-14	83.26	4	1.63472
2013-03-15	85.58	5	2.74834
2013-03-18	87.25	1	1.9326
2013-03-19	87.25	2	0
2013-03-20	85.84	3	-1.62925
2013-03-21	83.82	4	-2.38135
2013-03-22	83.18	5	-0.766471
2013-03-25	82.24	1	-1.13651
2013-03-26	81.53	2	-0.867075
2013-03-27	82.99	3	1.77491
2013-03-28	83.34	4	0.420851
2013-03-29	83.29	5	-0.0600132
2013-04-01	83.29	1	0
2013-04-02	82.39	2	-1.08644
2013-04-03	83.94	3	1.86382
2013-04-04	84.34	4	0.475399
2013-04-05	83.63	5	-0.845394
2013-04-08	83.63	1	0
2013-04-09	80.81	2	-3.43016
2013-04-10	85.26	3	5.36047
2013-04-11	80.91	4	-5.2368
2013-04-12	80.26	5	-0.806606
2013-04-15	81.2	1	1.16439
2013-04-16	79.95	2	-1.55138
2013-04-17	79.14	3	-1.0183
2013-04-18	81.4	4	2.81568
2013-04-19	80.24	5	-1.43531
2013-04-22	80.15	1	-0.112226
2013-04-23	80.15	2	0
2013-04-24	80.11	3	-0.0499189
2013-04-25	78	4	-2.66919
2013-04-26	78.27	5	0.345556
2013-04-29	79.29	1	1.29476
2013-04-30	80.78	2	1.86174
2013-05-01	82.51	3	2.11901
2013-05-02	78.91	4	-4.46115
2013-05-03	80.7	5	2.24306
2013-05-06	81.52	1	1.01098
2013-05-07	82.35	2	1.01301
2013-05-08	82.35	3	0
2013-05-09	82.77	4	0.508722
2013-05-10	82.94	5	0.205178
2013-05-13	81.49	1	-1.76371
2013-05-14	81.03	2	-0.566086
2013-05-15	81.87	3	1.03132
2013-05-16	81.43	4	-0.538887
2013-05-17	81.06	5	-0.455413
2013-05-20	81.33	1	0.332533
2013-05-21	80.95	2	-0.468327
2013-05-22	79.01	3	-2.42573
2013-05-23	78.62	4	-0.494831
2013-05-24	77.24	5	-1.77087
2013-05-27	77.03	1	-0.27225
2013-05-28	77.03	2	0
2013-05-29	76.98	3	-0.0649309
2013-05-30	76.32	4	-0.861062
2013-05-31	75.77	5	-0.723259
2013-06-03	75.77	1	0
2013-06-04	78.08	2	3.00315
2013-06-05	80.22	3	2.70389
2013-06-06	79.34	4	-1.10304
2013-06-07	80.87	5	1.91005
2013-06-10	80.86	1	-0.0123663
2013-06-11	82.64	2	2.17746
2013-06-12	84.08	3	1.72749
2013-06-13	85.86	4	2.09493
2013-06-14	87.55	5	1.9492
2013-06-17	87.1	1	-0.515317
2013-06-18	87.1	2	0
2013-06-19	82.74	3	-5.13537
2013-06-20	82.49	4	-0.302609
2013-06-21	81.34	5	-1.40392
2013-06-24	81.09	1	-0.307825
2013-06-25	79.48	2	-2.00542
2013-06-26	81.43	3	2.42383
2013-06-27	80.96	4	-0.578855
2013-06-28	81.77	5	0.995522
2013-07-01	81.26	1	-0.625654
2013-07-02	81.26	2	0
2013-07-03	81.84	3	0.711223
2013-07-04	82.78	4	1.14204
2013-07-05	82.78	5	0
2013-07-08	82.06	1	-0.87358
2013-07-09	82.01	2	-0.0609496
2013-07-10	82.23	3	0.267901
2013-07-11	82.89	4	0.799423
2013-07-12	80.81	5	-2.54137
2013-07-15	80.77	1	-0.0495111
2013-07-16	81	2	0.284355
2013-07-17	80.37	3	-0.780818
2013-07-18	79.8	4	-0.711747
2013-07-19	80.81	5	1.25772
2013-07-22	80.81	1	0
2013-07-23	82.31	2	1.83919
2013-07-24	81.97	3	-0.413928
2013-07-25	82.08	4	0.134105
2013-07-26	82.1	5	0.0243635
2013-07-29	81.23	1	-1.06534
2013-07-30	80.71	2	-0.642215
2013-07-31	81.38	3	0.826706
2013-08-01	81.56	4	0.22094
2013-08-02	81.84	5	0.342718
2013-08-05	81.23	1	-0.748148
2013-08-06	81.29	2	0.0738371
2013-08-07	81.73	3	0.539812
2013-08-08	84.45	4	3.27385
2013-08-09	85.27	5	0.966305
2013-08-12	84.96	1	-0.364214
2013-08-13	85.97	2	1.18178
2013-08-14	87.49	3	1.75261
2013-08-15	87.39	4	-0.114364
2013-08-16	87.39	5	0
2013-08-19	89.14	1	1.98273
2013-08-20	88.47	2	-0.754466
2013-08-21	84.47	3	-4.62671
2013-08-22	79.86	4	-5.61213
2013-08-23	79.96	5	0.125141
2013-08-26	80.31	1	0.436764
2013-08-27	81.57	2	1.55674
2013-08-28	80.82	3	-0.923709
2013-08-29	80.33	4	-0.608131
2013-08-30	79.89	5	-0.549246
2013-09-02	80.04	1	0.187582
2013-09-03	80.04	2	0
2013-09-04	79.37	3	-0.840605
2013-09-05	79.38	4	0.0125984
2013-09-06	79	5	-0.479859
2013-09-09	79.89	1	1.12028
2013-09-10	80.29	2	0.499439
2013-09-11	81.32	3	1.27469
2013-09-12	81.36	4	0.0491763
2013-09-13	82.41	5	1.2823
2013-09-16	81.72	1	-0.840802
2013-09-17	81.5	2	-0.269575
2013-09-18	80.99	3	-0.627733
2013-09-19	82.06	4	1.3125
2013-09-20	81.55	5	-0.623436
2013-09-23	81.19	1	-0.442424
2013-09-24	80.94	2	-0.308395
2013-09-25	81.09	3	0.185151
2013-09-26	81.43	4	0.418411
2013-09-27	81.43	5	0
2013-09-30	83.41	1	2.40245
2013-10-01	83.83	2	0.502273
2013-10-02	83.83	3	0
2013-10-03	83.83	4	0
2013-10-04	83.83	5	0
2013-10-07	83.83	1	0
2013-10-08	83.83	2	0
2013-10-09	83.83	3	0
2013-10-10	83.83	4	0
2013-10-11	83.83	5	0
2013-10-14	83.83	1	0
2013-10-15	83.83	2	0
2013-10-16	83.83	3	0
2013-10-17	83.83	4	0
2013-10-18	80.01	5	-4.66393
2013-10-21	79.44	1	-0.714961
2013-10-22	79.69	2	0.314209
2013-10-23	79.54	3	-0.188407
2013-10-24	77.78	4	-2.23757
2013-10-25	76.51	5	-1.64629
2013-10-28	76.45	1	-0.0784519
2013-10-29	76	2	-0.590359
2013-10-30	75.71	3	-0.382309
2013-10-31	75.71	4	0
2013-11-01	75.71	5	0
2013-11-04	74.16	1	-2.06853
2013-11-05	74.16	2	0
2013-11-06	73.49	3	-0.907558
2013-11-07	74.51	4	1.3784
2013-11-08	74.33	5	-0.241871
2013-11-11	74.33	1	0
2013-11-12	74.41	2	0.10757
2013-11-13	74.41	3	0
2013-11-14	75.34	4	1.24209
2013-11-15	73.87	5	-1.97044
2013-11-18	74.46	1	0.795528
2013-11-19	73.97	2	-0.660246
2013-11-20	73.83	3	-0.189445
2013-11-21	74.39	4	0.755637
2013-11-22	74.64	5	0.335503
2013-11-25	73.49	1	-1.55272
2013-11-26	74.65	2	1.56612
2013-11-27	75.28	3	0.840397
2013-11-28	74.74	4	-0.719907
2013-11-29	74.74	5	0
2013-12-02	75.68	1	1.24985
2013-12-03	74.94	2	-0.982613
2013-12-04	74.94	3	0
2013-12-05	75.5	4	0.744486
2013-12-06	75.54	5	0.0529661
2013-12-09	77.19	1	2.16076
2013-12-10	77.15	2	-0.0518336
2013-12-11	77.53	3	0.491338
2013-12-12	79.31	4	2.26993
2013-12-13	79.86	5	0.691088
2013-12-16	79.91	1	0.06259
2013-12-17	80.09	2	0.225
2013-12-18	79.61	3	-0.601129
2013-12-19	79.71	4	0.125534
2013-12-20	80.02	5	0.388155
2013-12-23	79.96	1	-0.0750094
2013-12-24	79.03	2	-1.1699
2013-12-25	79.03	3	0
2013-12-26	79.99	4	1.20741
2013-12-27	79.78	5	-0.262878
2013-12-30	81.01	1	1.52998
2013-12-31	81.4	2	0.480267
2014-01-01	81.4	3	0
2014-01-02	81.28	4	-0.147529
2014-01-03	80.42	5	-1.06371
2014-01-06	79.56	1	-1.07514
2014-01-07	80.27	2	0.88845
2014-01-08	81.16	3	1.10266
2014-01-09	79.64	4	-1.8906
2014-01-10	79.4	5	-0.301811
2014-01-13	79.17	1	-0.290093
2014-01-14	79.17	2	0
2014-01-15	80.24	3	1.34247
2014-01-16	81.1	4	1.06608
2014-01-17	82.46	5	1.66304
2014-01-20	83.18	1	0.869361
2014-01-21	83.18	2	0
2014-01-22	84.34	3	1.38493
2014-01-23	84.06	4	-0.332542
2014-01-24	83.56	5	-0.596589
2014-01-27	83.19	1	-0.443779
2014-01-28	80.64	2	-3.11323
2014-01-29	80.71	3	0.0867679
2014-01-30	82	4	1.58568
2014-01-31	82.49	5	0.595783
2014-02-03	82.34	1	-0.182006
2014-02-04	81.54	2	-0.976332
2014-02-05	81.89	3	0.428319
2014-02-06	82.05	4	0.195193
2014-02-07	82.83	5	0.94615
2014-02-10	83.87	1	1.24777
2014-02-11	83.8	2	-0.0834974
2014-02-12	85.09	3	1.52765
2014-02-13	84.87	4	-0.258885
2014-02-14	84.11	5	-0.899521
2014-02-17	83.92	1	-0.22615
2014-02-18	83.92	2	0
2014-02-19	84.45	3	0.629568
2014-02-20	82.97	4	-1.76805
2014-02-21	82.71	5	-0.313858
2014-02-24	83.43	1	0.866744
2014-02-25	84.39	2	1.1441
2014-02-26	82.43	3	-2.34995
2014-02-27	81.44	4	-1.20829
2014-02-28	82.94	5	1.82509
2014-03-03	82.31	1	-0.762485
2014-03-04	83.52	2	1.45935
2014-03-05	84.16	3	0.763362
2014-03-06	83.61	4	-0.655662
2014-03-07	86.61	5	3.52522
2014-03-10	86.37	1	-0.277489
2014-03-11	86.65	2	0.323662
2014-03-12	86.68	3	0.0346161
2014-03-13	87.29	4	0.701273
2014-03-14	86.77	5	-0.597497
2014-03-17	87.28	1	0.58604
2014-03-18	87.09	2	-0.217927
2014-03-19	88.02	3	1.0622
2014-03-20	87.66	4	-0.409837
2014-03-21	87.2	5	-0.526136
2014-03-24	88.19	1	1.12892
2014-03-25	85.49	2	-3.10942
2014-03-26	88.97	3	3.98998
2014-03-27	86.51	4	-2.80392
2014-03-28	87.15	5	0.737076
2014-03-31	87.85	1	0.800004
2014-04-01	87.69	2	-0.182295
2014-04-02	86.23	3	-1.67897
2014-04-03	85.69	4	-0.628201
2014-04-04	85.16	5	-0.620429
2014-04-07	86.61	1	1.68834
2014-04-08	84.84	2	-2.06482
2014-04-09	85.96	3	1.31149
2014-04-10	85.96	4	0
2014-04-11	83.41	5	-3.01139
2014-04-14	83.41	1	0
2014-04-15	85.26	2	2.19372
2014-04-16	84.26	3	-1.17982
2014-04-17	85.24	4	1.15636
2014-04-18	85.42	5	0.210946
2014-04-21	85.42	1	0
2014-04-22	85.33	2	-0.105417
2014-04-23	86.36	3	1.19985
2014-04-24	85.78	4	-0.673873
2014-04-25	86.11	5	0.383967
2014-04-28	86.14	1	0.0348331
2014-04-29	85.13	2	-1.17944
2014-04-30	86.94	3	2.10387
2014-05-01	86.94	4	0
2014-05-02	87.11	5	0.195346
2014-05-05	87.19	1	0.0917958
2014-05-06	87.5	2	0.354915
2014-05-07	86.74	3	-0.872365
2014-05-08	82.31	4	-5.24225
2014-05-09	85.93	5	4.30404
2014-05-12	85.22	1	-0.829686
2014-05-13	84.18	2	-1.22788
2014-05-14	83.84	3	-0.404714
2014-05-15	83.61	4	-0.274709
2014-05-16	83.29	5	-0.383464
2014-05-19	82.76	1	-0.638364
2014-05-20	82.07	2	-0.837231
2014-05-21	82.04	3	-0.0365608
2014-05-22	82.39	4	0.425714
2014-05-23	81.31	5	-1.31951
2014-05-26	79.83	1	-1.83696
2014-05-27	79.83	2	0
2014-05-28	78.62	3	-1.52733
2014-05-29	78.62	4	0
2014-05-30	79.82	5	1.5148
2014-06-02	79.91	1	0.11269
2014-06-03	80.13	2	0.274931
2014-06-04	80.76	3	0.783148
2014-06-05	79.49	4	-1.58506
2014-06-06	79.07	5	-0.529769
2014-06-09	79.07	1	0
2014-06-10	78.11	2	-1.22154
2014-06-11	79.86	3	2.2157
2014-06-12	79.08	4	-0.98151
2014-06-13	79.16	5	0.101112
2014-06-16	80.49	1	1.66618
2014-06-17	81.18	2	0.853596
2014-06-18	77.49	3	-4.652
2014-06-19	78.75	4	1.61294
2014-06-20	78.4	5	-0.445435
2014-06-23	79.03	1	0.80036
2014-06-24	79.68	2	0.819109
2014-06-25	78	3	-2.13098
2014-06-26	76.32	4	-2.17738
2014-06-27	75.55	5	-1.01403
2014-06-30	75.68	1	0.171924
2014-07-01	74.74	2	-1.24985
2014-07-02	73.96	3	-1.0491
2014-07-03	73.65	4	-0.420026
2014-07-04	73.17	5	-0.653864
2014-07-07	73.17	1	0
2014-07-08	71.63	2	-2.12715
2014-07-09	71.53	3	-0.139704
2014-07-10	72	4	0.654918
2014-07-11	70.32	5	-2.36099
2014-07-14	70.04	1	-0.398975
2014-07-15	70.14	2	0.142674
2014-07-16	69.79	3	-0.500251
2014-07-17	69.96	4	0.243292
2014-07-18	70	5	0.0571592
2014-07-21	70.13	1	0.185542
2014-07-22	69.98	2	-0.214118
2014-07-23	70.18	3	0.285388
2014-07-24	70.09	4	-0.128324
2014-07-25	67.68	5	-3.49894
2014-07-28	66.44	1	-1.84914
2014-07-29	66.79	2	0.525408
2014-07-30	65.85	3	-1.41739
2014-07-31	65.06	4	-1.20695
2014-08-01	63.53	5	-2.37977
2014-08-04	63.81	1	0.439768
2014-08-05	65.26	2	2.24694
2014-08-06	64.79	3	-0.722802
2014-08-07	65.01	4	0.338983
2014-08-08	64.16	5	-1.31611
2014-08-11	64.33	1	0.264612
2014-08-12	64.63	2	0.465261
2014-08-13	63.06	3	-2.4592
2014-08-14	63.76	4	1.10394
2014-08-15	63.76	5	0
2014-08-18	63.39	1	-0.581991
2014-08-19	63.14	2	-0.395164
2014-08-20	63.3	3	0.253085
2014-08-21	64.69	4	2.17213
2014-08-22	65.89	5	1.83801
2014-08-25	66.72	1	1.25181
2014-08-26	66.94	2	0.329194
2014-08-27	67.51	3	0.847904
2014-08-28	67.51	4	0
2014-08-29	66.53	5	-1.46228
2014-09-01	66.86	1	0.494791
2014-09-02	66.86	2	0
2014-09-03	65.6	3	-1.90252
2014-09-04	66	4	0.607905
2014-09-05	65.27	5	-1.11222
2014-09-08	65.27	1	0
2014-09-09	65.83	2	0.854315
2014-09-10	66.7	3	1.31293
2014-09-11	69.1	4	3.53498
2014-09-12	69.64	5	0.778438
2014-09-15	69.29	1	-0.503852
2014-09-16	66.84	2	-3.59989
2014-09-17	66.91	3	0.104673
2014-09-18	64.91	4	-3.03467
2014-09-19	64.39	5	-0.804335
2014-09-22	63.85	1	-0.842176
2014-09-23	62.06	2	-2.84349
2014-09-24	62.31	3	0.402027
2014-09-25	61.19	4	-1.81381
2014-09-26	61.07	5	-0.196303
2014-09-29	61.71	1	1.04252
2014-09-30	61.44	2	-0.43849
2014-10-01	61.37	3	-0.113997
2014-10-02	62.22	4	1.37554
2014-10-03	62	5	-0.354211
2014-10-06	62.59	1	0.947114
2014-10-07	64.24	2	2.60205
2014-10-08	65.04	3	1.23764
2014-10-09	64.81	4	-0.354255
2014-10-10	63.85	5	-1.49233
2014-10-13	63.96	1	0.172131
2014-10-14	63.96	2	0
2014-10-15	63.94	3	-0.0312744
2014-10-16	63.64	4	-0.470294
2014-10-17	63.26	5	-0.598899
2014-10-20	62.86	1	-0.634319
2014-10-21	62.39	2	-0.750503
2014-10-22	62.74	3	0.55942
2014-10-23	62.66	4	-0.127592
2014-10-24	62.92	5	0.414079
2014-10-27	63.47	1	0.870328
2014-10-28	63.37	2	-0.157679
2014-10-29	64.09	3	1.12978
2014-10-30	64.75	4	1.02454
2014-10-31	63.79	5	-1.49373
2014-11-03	63.46	1	-0.518665
2014-11-04	63.32	2	-0.220855
2014-11-05	61.75	3	-2.51073
2014-11-06	61.76	4	0.016193
2014-11-07	62.06	5	0.484575
2014-11-10	62.76	1	1.12163
2014-11-11	61.24	2	-2.45174
2014-11-12	61.24	3	0
2014-11-13	60.46	4	-1.28186
2014-11-14	58.24	5	-3.74096
2014-11-17	57.95	1	-0.499183
2014-11-18	57.46	2	-0.849152
2014-11-19	57.46	3	0
2014-11-20	57.57	4	0.191255
2014-11-21	57.4	5	-0.29573
2014-11-24	57.4	1	0
2014-11-25	57.44	2	0.0696621
2014-11-26	57.94	3	0.866707
2014-11-27	58.66	4	1.23501
2014-11-28	58.66	5	0
2014-12-01	58.7	1	0.0681663
2014-12-02	57.91	2	-1.35496
2014-12-03	58.06	3	0.258688
2014-12-04	58.31	4	0.429665
2014-12-05	59.09	5	1.32881
2014-12-08	58.31	1	-1.32881
2014-12-09	58.01	2	-0.51582
2014-12-10	58.56	3	0.943646
2014-12-11	58.34	4	-0.376391
2014-12-12	59.38	5	1.76695
2014-12-15	59.49	1	0.185076
2014-12-16	59.68	2	0.318872
2014-12-17	58.77	3	-1.53654
2014-12-18	59.64	4	1.4695
2014-12-19	59.62	5	-0.0335402
2014-12-22	59.89	1	0.451846
2014-12-23	60.85	2	1.59023
2014-12-24	60.69	3	-0.263288
2014-12-25	60.69	4	0
2014-12-26	60.69	5	0
2014-12-29	60.69	1	0
2014-12-30	60.83	2	0.230415
2014-12-31	60.81	3	-0.0328839
2015-01-01	60.81	4	0
2015-01-02	59.09	5	-2.86925
2015-01-05	58.38	1	-1.20883
2015-01-06	59.33	2	1.61417
2015-01-07	58.82	3	-0.863315
2015-01-08	58.99	4	0.2886
2015-01-09	59.15	5	0.270865
2015-01-12	59.36	1	0.354401
2015-01-13	58.41	2	-1.61335
2015-01-14	59	3	1.00503
2015-01-15	57.95	4	-1.79569
2015-01-16	58.46	5	0.876219
2015-01-19	58.13	1	-0.566088
2015-01-20	58.13	2	0
2015-01-21	56.89	3	-2.15623
2015-01-22	57.11	4	0.385965
2015-01-23	56.83	5	-0.491488
2015-01-26	56.36	1	-0.830467
2015-01-27	57.66	2	2.2804
2015-01-28	57.81	3	0.259808
2015-01-29	58.42	4	1.04965
2015-01-30	58.48	5	0.102652
2015-02-02	58.33	1	-0.256827
2015-02-03	58.85	2	0.887529
2015-02-04	60.18	3	2.23482
2015-02-05	59.95	4	-0.382919
2015-02-06	60.49	5	0.896718
2015-02-09	60.24	1	-0.414148
2015-02-10	60.96	2	1.18813
2015-02-11	61.19	3	0.376587
2015-02-12	60.69	4	-0.820484
2015-02-13	61.16	5	0.771444
2015-02-16	61.66	1	0.814204
2015-02-17	61.66	2	0
2015-02-18	62.88	3	1.95927
2015-02-19	63.66	4	1.23283
2015-02-20	62.99	5	-1.05804
2015-02-23	62.97	1	-0.0317561
2015-02-24	62.5	2	-0.749187
2015-02-25	63.01	3	0.812689
2015-02-26	63.54	4	0.837618
2015-02-27	63.22	5	-0.504892
2015-03-02	62.91	1	-0.491557
2015-03-03	62.86	2	-0.0795102
2015-03-04	61.63	3	-1.97613
2015-03-05	61.61	4	-0.032457
2015-03-06	61.2	5	-0.667701
2015-03-09	60.94	1	-0.425742
2015-03-10	60.29	2	-1.07235
2015-03-11	58.87	3	-2.38346
2015-03-12	58.49	4	-0.647582
2015-03-13	59.34	5	1.44278
2015-03-16	58.75	1	-0.999246
2015-03-17	58.67	2	-0.136263
2015-03-18	58.4	3	-0.461263
2015-03-19	60.66	4	3.79686
2015-03-20	61.14	5	0.788181
2015-03-23	61.05	1	-0.147312
2015-03-24	62.29	2	2.01077
2015-03-25	62.04	3	-0.402156
2015-03-26	61.4	4	-1.03695
2015-03-27	61.34	5	-0.0977676
2015-03-30	61.68	1	0.552757
2015-03-31	60.59	2	-1.78299
2015-04-01	61.14	3	0.903645
2015-04-02	60.63	4	-0.83765
2015-04-03	61.71	5	1.76562
2015-04-06	61.71	1	0
2015-04-07	63.31	2	2.55973
2015-04-08	64.37	3	1.66044
2015-04-09	64.66	4	0.449509
2015-04-10	64.16	5	-0.776281
2015-04-13	63.04	1	-1.76105
2015-04-14	63.09	2	0.0792833
2015-04-15	62.64	3	-0.715823
2015-04-16	62.56	4	-0.127796
2015-04-17	62.01	5	-0.883043
2015-04-20	61.42	1	-0.956015
2015-04-21	61.49	2	0.113904
2015-04-22	61.06	3	-0.701757
2015-04-23	61.01	4	-0.0819202
2015-04-24	63.54	5	4.06318
2015-04-27	64.46	1	1.43752
2015-04-28	64.38	2	-0.124185
2015-04-29	64.49	3	0.170715
2015-04-30	64.92	4	0.664557
2015-05-01	65.63	5	1.08772
2015-05-04	64.36	1	-1.95406
2015-05-05	64.34	2	-0.03108
2015-05-06	64.39	3	0.077682
2015-05-07	63.61	4	-1.21877
2015-05-08	63.31	5	-0.47274
2015-05-11	63.97	1	1.03709
2015-05-12	63.21	2	-1.19517
2015-05-13	62.87	3	-0.539341
2015-05-14	63.62	4	1.18588
2015-05-15	64.34	5	1.12536
2015-05-18	64.71	1	0.573423
2015-05-19	63.05	2	-2.59877
2015-05-20	62.5	3	-0.876151
2015-05-21	62.29	4	-0.336566
2015-05-22	61.84	5	-0.725049
2015-05-25	61.39	1	-0.730345
2015-05-26	61.39	2	0
2015-05-27	61.4	3	0.016288
2015-05-28	61.14	4	-0.424352
2015-05-29	62.41	5	2.05592
2015-06-01	62.43	1	0.032041
2015-06-02	61.86	2	-0.917216
2015-06-03	61.68	3	-0.291404
2015-06-04	63.35	4	2.67152
2015-06-05	63.26	5	-0.142169
2015-06-08	62.19	1	-1.7059
2015-06-09	62.96	2	1.23054
2015-06-10	62.79	3	-0.270378
2015-06-11	63.1	4	0.492494
2015-06-12	61.7	5	-2.24368
2015-06-15	62.23	1	0.855327
2015-06-16	61.4	2	-1.34274
2015-06-17	62.63	3	1.98346
2015-06-18	62.62	4	-0.0159681
2015-06-19	63.06	5	0.700194
2015-06-22	62.26	1	-1.27675
2015-06-23	63.07	2	1.29261
2015-06-24	62.63	3	-0.700082
2015-06-25	62.03	4	-0.962626
2015-06-26	62.36	5	0.530591
2015-06-29	65.14	1	4.36148
2015-06-30	65.14	2	0
2015-07-01	65.65	3	0.77988
2015-07-02	64.07	4	-2.43614
2015-07-03	64.34	5	0.420529
2015-07-06	64.34	1	0
2015-07-07	64.13	2	-0.326925
2015-07-08	63.22	3	-1.42916
2015-07-09	62.26	4	-1.53015
2015-07-10	62.51	5	0.400738
2015-07-13	62.45	1	-0.0960307
2015-07-14	62.45	2	0
2015-07-15	62.91	3	0.73389
2015-07-16	62.07	4	-1.34424
2015-07-17	62.62	5	0.882194
2015-07-20	62.62	1	0
2015-07-21	62.61	2	-0.0159706
2015-07-22	62.21	3	-0.640925
2015-07-23	62.46	4	0.401059
2015-07-24	62.73	5	0.431345
2015-07-27	62.67	1	-0.0956938
2015-07-28	61.15	2	-2.4553
2015-07-29	61.2	3	0.0817327
2015-07-30	60.71	4	-0.803876
2015-07-31	60.47	5	-0.396105
2015-08-03	60.79	1	0.527793
2015-08-04	60.79	2	0
2015-08-05	61.65	3	1.40479
2015-08-06	61.46	4	-0.308667
2015-08-07	61.46	5	0
2015-08-10	59.48	1	-3.27464
2015-08-11	59.8	2	0.536554
2015-08-12	59.36	3	-0.738506
2015-08-13	62.46	4	5.09058
2015-08-14	63.61	5	1.82443
2015-08-17	63.61	1	0
2015-08-18	64.41	2	1.24982
2015-08-19	64.45	3	0.0620829
2015-08-20	63.9	4	-0.857037
2015-08-21	64.19	5	0.452807
2015-08-24	64.17	1	-0.0311624
2015-08-25	61.17	2	-4.78789
2015-08-26	61.17	3	0
2015-08-27	59.61	4	-2.58335
2015-08-28	60.95	5	2.22305
2015-08-31	60.89	1	-0.0984898
2015-09-01	60.89	2	0
2015-09-02	60.77	3	-0.197271
2015-09-03	60.34	4	-0.710101
2015-09-04	60.3	5	-0.066313
2015-09-07	60.26	1	-0.066357
2015-09-08	60.26	2	0
2015-09-09	60.49	3	0.380953
2015-09-10	60.66	4	0.280644
2015-09-11	60.84	5	0.296297
2015-09-14	61.42	1	0.948805
2015-09-15	60.86	2	-0.915937
2015-09-16	60.23	3	-1.04056
2015-09-17	59.77	4	-0.76667
2015-09-18	60.21	5	0.733459
2015-09-21	58.61	1	-2.69331
2015-09-22	58.85	2	0.40865
2015-09-23	58.14	3	-1.21379
2015-09-24	58.12	4	-0.0344056
2015-09-25	58.44	5	0.549075
2015-09-28	58.74	1	0.512034
2015-09-29	58.82	2	0.136101
2015-09-30	59.07	3	0.424125
2015-10-01	58.67	4	-0.679466
2015-10-02	58.79	5	0.204325
2015-10-05	58.46	1	-0.562901
2015-10-06	59.91	2	2.45007
2015-10-07	60.06	3	0.250063
2015-10-08	60.11	4	0.0832154
2015-10-09	60.09	5	-0.0332779
2015-10-12	59.94	1	-0.249938
2015-10-13	59.94	2	0
2015-10-14	62.19	3	3.68502
2015-10-15	62.04	4	-0.241488
2015-10-16	61.67	5	-0.598175
2015-10-19	62.14	1	0.759231
2015-10-20	61.56	2	-0.937759
2015-10-21	62.09	3	0.857264
2015-10-22	62.09	4	0
2015-10-23	61.01	5	-1.75472
2015-10-26	61.01	1	0
2015-10-27	61.01	2	0
2015-10-28	61.01	3	0
2015-10-29	61.01	4	0
2015-10-30	61.01	5	0
2015-11-02	61.8	1	1.28656
2015-11-03	61.78	2	-0.0323677
2015-11-04	60.91	3	-1.41823
2015-11-05	60.39	4	-0.857384
2015-11-06	60.39	5	0
2015-11-09	60.26	1	-0.215499
2015-11-10	60.43	2	0.281714
2015-11-11	60.45	3	0.0330907
2015-11-12	60.39	4	-0.0993049
2015-11-13	60.39	5	0
2015-11-16	60.38	1	-0.0165604
2015-11-17	61.04	2	1.08715
2015-11-18	61.09	3	0.08188
2015-11-19	61.39	4	0.489877
2015-11-20	61.39	5	0
2015-11-23	61.56	1	0.276535
2015-11-24	60.54	2	-1.6708
2015-11-25	60.78	3	0.395648
2015-11-26	61.81	4	1.68044
2015-11-27	61.81	5	0
2015-11-30	62.49	1	1.09414
2015-12-01	61.21	2	-2.0696
2015-12-02	62.03	3	1.33076
2015-12-03	61.89	4	-0.225952
2015-12-04	62.21	5	0.515714
2015-12-07	63.11	1	1.43635
2015-12-08	63.16	2	0.0791954
2015-12-09	63.06	3	-0.158454
2015-12-10	63.4	4	0.537721
2015-12-11	62.37	5	-1.63795
2015-12-14	62.29	1	-0.128349
2015-12-15	62.02	2	-0.434399
2015-12-16	61.97	3	-0.0806517
2015-12-17	61.96	4	-0.0161381
2015-12-18	61.78	5	-0.290933
2015-12-21	62.42	1	1.0306
2015-12-22	62.09	2	-0.530079
2015-12-23	61.94	3	-0.241877
2015-12-24	61.48	4	-0.745426
2015-12-25	61.48	5	0
2015-12-28	61.48	1	0
2015-12-29	62.55	2	1.72543
2015-12-30	62.48	3	-0.111973
2015-12-31	62.62	4	0.223821
2016-01-01	62.62	5	0
2016-01-04	62.62	1	0
2016-01-05	61.51	2	-1.7885
2016-01-06	61.52	3	0.0162562
2016-01-07	60.89	4	-1.02934
2016-01-08	60.34	5	-0.907372
2016-01-11	60.29	1	-0.0828981
2016-01-12	60.43	2	0.231942
2016-01-13	60.49	3	0.0992392
2016-01-14	60.89	4	0.65909
2016-01-15	60.71	5	-0.296053
2016-01-18	60.29	1	-0.694218
2016-01-19	61.34	2	1.72659
2016-01-20	61.34	3	0
2016-01-21	60.94	4	-0.654239
2016-01-22	61.03	5	0.147577
2016-01-25	61.32	1	0.474051
2016-01-26	61.32	2	0
2016-01-27	60.33	3	-1.62766
2016-01-28	59.83	4	-0.832229
2016-01-29	60.33	5	0.832229
2016-02-01	60.13	1	-0.332061
2016-02-02	60.85	2	1.19029
2016-02-03	61.21	3	0.589876
2016-02-04	60.81	4	-0.655633
2016-02-05	59.09	5	-2.86925
2016-02-08	58.94	1	-0.254173
2016-02-09	58.61	2	-0.561465
2016-02-10	57.64	3	-1.66886
2016-02-11	57.88	4	0.415513
2016-02-12	57.55	5	-0.571777
2016-02-15	57.89	1	0.589052
2016-02-16	57.89	2	0
2016-02-17	58.6	3	1.219
2016-02-18	58.32	4	-0.478961
2016-02-19	58.29	5	-0.0514536
2016-02-22	58.14	1	-0.257666
2016-02-23	57.28	2	-1.49024
2016-02-24	56.61	3	-1.17659
2016-02-25	56.04	4	-1.01199
2016-02-26	56.29	5	0.445118
2016-02-29	56.13	1	-0.284647
2016-03-01	55.11	2	-1.83392
2016-03-02	54.83	3	-0.50937
2016-03-03	54.56	4	-0.493648
2016-03-04	55.04	5	0.875918
2016-03-07	55.69	1	1.17404
2016-03-08	55.91	2	0.394266
2016-03-09	55.4	3	-0.916366
2016-03-10	55.21	4	-0.34355
2016-03-11	55.38	5	0.307442
2016-03-14	55.61	1	0.414452
2016-03-15	56.74	2	2.01164
2016-03-16	56.74	3	0
2016-03-17	56.76	4	0.0352423
2016-03-18	56.79	5	0.0528402
2016-03-21	55.83	1	-1.70489
2016-03-22	56.55	2	1.28138
2016-03-23	56.76	3	0.370665
2016-03-24	56.78	4	0.0352299
2016-03-25	56.09	5	-1.22266
2016-03-28	56.14	1	0.0891027
2016-03-29	56.14	2	0
2016-03-30	55.7	3	-0.786842
2016-03-31	55.98	4	0.501434
2016-04-01	56.64	5	1.1721
2016-04-04	57.25	1	1.07122
2016-04-05	57.08	2	-0.297385
2016-04-06	57.04	3	-0.0701017
2016-04-07	56.86	4	-0.316067
2016-04-08	57.06	5	0.351124
2016-04-11	58.09	1	1.78902
2016-04-12	58.76	2	1.14678
2016-04-13	59.47	3	1.20106
2016-04-14	59.56	4	0.151222
2016-04-15	58.56	5	-1.69323
2016-04-18	58.13	1	-0.736999
2016-04-19	60.13	2	3.3827
2016-04-20	60.73	3	0.992892
2016-04-21	61.46	4	1.19487
2016-04-22	61.44	5	-0.0325468
2016-04-25	61.35	1	-0.146592
2016-04-26	61.74	2	0.633685
2016-04-27	61.7	3	-0.0648088
2016-04-28	61.7	4	0
2016-04-29	61.7	5	0
2016-05-02	61.37	1	-0.536281
2016-05-03	61.94	2	0.924506
2016-05-04	60.79	3	-1.87409
2016-05-05	60.79	4	0
2016-05-06	60.79	5	0
2016-05-09	59.77	1	-1.69214
2016-05-10	59.41	2	-0.60413
2016-05-11	59.11	3	-0.506245
2016-05-12	58.89	4	-0.372882
2016-05-13	59.13	5	0.406711
2016-05-16	59.12	1	-0.0169133
2016-05-17	59.53	2	0.691111
2016-05-18	60.54	3	1.68239
2016-05-19	60.43	4	-0.181863
2016-05-20	59.44	5	-1.65183
2016-05-23	59.87	1	0.720814
2016-05-24	59.71	2	-0.267603
2016-05-25	61.11	3	2.3176
2016-05-26	61.18	4	0.114482
2016-05-27	62.63	5	2.34241
2016-05-30	62.59	1	-0.0638876
2016-05-31	62.59	2	0
2016-06-01	62.21	3	-0.608976
2016-06-02	61.3	4	-1.47359
2016-06-03	61.09	5	-0.343166
2016-06-06	62.12	1	1.67198
2016-06-07	63.79	2	2.65284
2016-06-08	64.07	3	0.43798
2016-06-09	64.02	4	-0.0780701
2016-06-10	63.44	5	-0.910096
2016-06-13	63.21	1	-0.363206
2016-06-14	62.24	2	-1.54646
2016-06-15	61.49	3	-1.21233
2016-06-16	61.04	4	-0.734517
2016-06-17	61.82	5	1.26975
2016-06-20	64.07	1	3.57493
2016-06-21	63.16	2	-1.4305
2016-06-22	61.84	3	-2.11208
2016-06-23	61.88	4	0.0646621
2016-06-24	63.41	5	2.44246
2016-06-27	62.7	1	-1.12601
2016-06-28	62.81	2	0.175285
2016-06-29	64.28	3	2.31342
2016-06-30	64.48	4	0.310656
2016-07-01	62.91	5	-2.465
2016-07-04	63.39	1	0.760099
2016-07-05	63.39	2	0
2016-07-06	63.63	3	0.377894
2016-07-07	63.65	4	0.0314268
2016-07-08	63.57	5	-0.125766
2016-07-11	64.26	1	1.07957
2016-07-12	66.49	2	3.41142
2016-07-13	68.64	3	3.18239
2016-07-14	71.81	4	4.51483
2016-07-15	71.81	5	0
2016-07-18	72.22	1	0.569327
2016-07-19	72.06	2	-0.221791
2016-07-20	71.36	3	-0.976162
2016-07-21	70.36	4	-1.41126
2016-07-22	71.08	5	1.01811
2016-07-25	70.91	1	-0.239454
2016-07-26	70.48	2	-0.608249
2016-07-27	71.99	3	2.11982
2016-07-28	72.13	4	0.194283
2016-07-29	71.34	5	-1.10129
2016-08-01	71.34	1	0
2016-08-02	71.34	2	0
2016-08-03	72.28	3	1.30903
2016-08-04	72.28	4	0
2016-08-05	74.29	5	2.74289
2016-08-08	74.29	1	0
2016-08-09	74.29	2	0
2016-08-10	71.51	3	-3.81391
2016-08-11	69.58	4	-2.73601
2016-08-12	69.66	5	0.11491
2016-08-15	68.24	1	-2.05954
2016-08-16	66.46	2	-2.64306
2016-08-17	66.4	3	-0.0903206
2016-08-18	66.72	4	0.48077
2016-08-19	66.89	5	0.254472
2016-08-22	65.94	1	-1.43042
2016-08-23	66.26	2	0.484116
2016-08-24	66.55	3	0.436715
2016-08-25	65.94	4	-0.920831
2016-08-26	66.25	5	0.469023
2016-08-29	66.22	1	-0.0452933
2016-08-30	65.24	2	-1.49098
2016-08-31	64.51	3	-1.12525
2016-09-01	63.91	4	-0.934441
2016-09-02	66.61	5	4.13789
2016-09-05	66.26	1	-0.526832
2016-09-06	66.26	2	0
2016-09-07	67.79	3	2.28283
2016-09-08	68.27	4	0.705574
2016-09-09	68.07	5	-0.293384
2016-09-12	67.66	1	-0.604142
2016-09-13	65.8	2	-2.78753
2016-09-14	66.04	3	0.364078
2016-09-15	66.88	4	1.26393
2016-09-16	67.16	5	0.417786
2016-09-19	66.49	1	-1.00263
2016-09-20	67.04	2	0.82379
2016-09-21	69.18	3	3.14223
2016-09-22	70.09	4	1.30683
2016-09-23	70.22	5	0.185304
2016-09-26	68.76	1	-2.1011
2016-09-27	68.77	2	0.0145423
2016-09-28	68.77	3	0
2016-09-29	67.41	4	-1.99742
2016-09-30	66.66	5	-1.11883
2016-10-03	66.99	1	0.493828
2016-10-04	67.3	2	0.461688
2016-10-05	68.26	3	1.41637
2016-10-06	66.73	4	-2.26693
2016-10-07	66.5	5	-0.345268
2016-10-10	65.99	1	-0.769873
2016-10-11	65.99	2	0
2016-10-12	65.99	3	0
2016-10-13	67.91	4	2.86801
2016-10-14	68.08	5	0.250019
2016-10-17	69.34	1	1.83385
2016-10-18	69.85	2	0.732815
2016-10-19	69.82	3	-0.0429584
2016-10-20	69.79	4	-0.0429769
2016-10-21	68.54	5	-1.80732
2016-10-24	68.01	1	-0.776276
2016-10-25	67.73	2	-0.412554
2016-10-26	67.49	3	-0.354977
2016-10-27	67.49	4	0
2016-10-28	68.26	5	1.13445
2016-10-31	68.26	1	0
2016-11-01	69.94	2	2.43138
2016-11-02	67.61	3	-3.38818
2016-11-03	67.75	4	0.206856
2016-11-04	67.34	5	-0.607005
2016-11-07	67.88	1	0.798703
2016-11-08	67.82	2	-0.0884304
2016-11-09	68.07	3	0.367945
2016-11-10	67.74	4	-0.485974
2016-11-11	67.74	5	0
2016-11-14	68.61	1	1.27614
2016-11-15	68.11	2	-0.731425
2016-11-16	69.89	3	2.57985
2016-11-17	70.81	4	1.30777
2016-11-18	71.64	5	1.16533
2016-11-21	71.48	1	-0.223589
2016-11-22	71.39	2	-0.125989
2016-11-23	71.21	3	-0.252455
2016-11-24	70.64	4	-0.80367
2016-11-25	70.64	5	0
2016-11-28	70.29	1	-0.496702
2016-11-29	70.98	2	0.976861
2016-11-30	70.25	3	-1.03378
2016-12-01	70.52	4	0.383605
2016-12-02	69.96	5	-0.797271
2016-12-05	70.06	1	0.142837
2016-12-06	70.04	2	-0.028551
2016-12-07	70.41	3	0.526879
2016-12-08	70.21	4	-0.284455
2016-12-09	70.48	5	0.383823
2016-12-12	69.75	1	-1.04116
2016-12-13	70.6	2	1.21127
2016-12-14	70.99	3	0.550888
2016-12-15	70.59	4	-0.565053
2016-12-16	70.8	5	0.297051
2016-12-19	69.99	1	-1.15066
2016-12-20	68.51	2	-2.13727
2016-12-21	68.35	3	-0.233816
2016-12-22	69.13	4	1.13472
2016-12-23	68.96	5	-0.246216
2016-12-26	68.73	1	-0.334084
2016-12-27	68.73	2	0
2016-12-28	68.64	3	-0.131033
2016-12-29	68.64	4	0
2016-12-30	69.25	5	0.884769
2017-01-02	69.36	1	0.158719
2017-01-03	69.36	2	0
2017-01-04	70.59	3	1.75782
2017-01-05	72.88	4	3.19258
2017-01-06	72.88	5	0
2017-01-09	72.21	1	-0.923571
2017-01-10	71.21	2	-1.39453
2017-01-11	71.49	3	0.392432
2017-01-12	71.49	4	0
2017-01-13	70.92	5	-0.80051
2017-01-16	70.87	1	-0.0705268
2017-01-17	70.87	2	0
2017-01-18	70.69	3	-0.254309
2017-01-19	70.9	4	0.296631
2017-01-20	71.21	5	0.436282
2017-01-23	71.46	1	0.350459
2017-01-24	73.02	2	2.15955
2017-01-25	71.98	3	-1.43451
2017-01-26	72.27	4	0.40208
2017-01-27	72.56	5	0.40047
2017-01-30	73.04	1	0.659343
2017-01-31	72.17	2	-1.19828
2017-02-01	72.81	3	0.882886
2017-02-02	73.81	4	1.36409
2017-02-03	74.08	5	0.365137
2017-02-06	73.72	1	-0.487146
2017-02-07	73.16	2	-0.762531
2017-02-08	72.78	3	-0.520763
2017-02-09	72.89	4	0.151026
2017-02-10	73.2	5	0.424397
2017-02-13	73.37	1	0.231971
2017-02-14	73.94	2	0.773882
2017-02-15	73.73	3	-0.284418
2017-02-16	73.31	4	-0.571275
2017-02-17	72.94	5	-0.505984
2017-02-20	71.84	1	-1.51958
2017-02-21	71.84	2	0
2017-02-22	71.94	3	0.139101
2017-02-23	71.81	4	-0.18087
2017-02-24	72.39	5	0.804443
2017-02-27	72.87	1	0.660886
2017-02-28	72.69	2	-0.247321
2017-03-01	72.85	3	0.219871
2017-03-02	74.08	4	1.67431
2017-03-03	73.52	5	-0.758811
2017-03-06	74.39	1	1.1764
2017-03-07	75.47	2	1.44137
2017-03-08	74.77	3	-0.931849
2017-03-09	74.89	4	0.160364
2017-03-10	74.69	5	-0.267416
2017-03-13	74.24	1	-0.604313
2017-03-14	73.94	2	-0.404913
2017-03-15	74.21	3	0.364496
2017-03-16	75.02	4	1.08558
2017-03-17	75.09	5	0.0932649
2017-03-20	75.29	1	0.265993
2017-03-21	74.41	2	-1.1757
2017-03-22	73.85	3	-0.755433
2017-03-23	74.23	4	0.513237
2017-03-24	74.23	5	0
2017-03-27	74.44	1	0.282505
2017-03-28	74.06	2	-0.511786
2017-03-29	74.02	3	-0.0540249
2017-03-30	73.21	4	-1.10033
2017-03-31	73.27	5	0.0819225
2017-04-03	74.2	1	1.26129
2017-04-04	72.37	2	-2.49723
2017-04-05	72	3	-0.512573
2017-04-06	72.12	4	0.166528
2017-04-07	71.86	5	-0.361162
2017-04-10	70.97	1	-1.24625
2017-04-11	72.68	2	2.3809
2017-04-12	72.65	3	-0.0412854
2017-04-13	72.38	4	-0.372337
2017-04-14	73.26	5	1.20847
2017-04-17	73.26	1	0
2017-04-18	75.09	2	2.46726
2017-04-19	75.15	3	0.0798722
2017-04-20	75.34	4	0.252509
2017-04-21	76.4	5	1.39715
2017-04-24	76.56	1	0.209205
2017-04-25	76.03	2	-0.694675
2017-04-26	76.44	3	0.537812
2017-04-27	76.46	4	0.0261609
2017-04-28	75.01	5	-1.91463
2017-05-01	75.66	1	0.862818
2017-05-02	75.71	2	0.0660633
2017-05-03	76.01	3	0.395466
2017-05-04	75.44	4	-0.752727
2017-05-05	75.61	5	0.225091
2017-05-08	75.61	1	0
2017-05-09	73.89	2	-2.3011
2017-05-10	74.06	3	0.229807
2017-05-11	73.24	4	-1.11339
2017-05-12	76.02	5	3.72547
2017-05-15	78.59	1	3.3248
2017-05-16	81.76	2	3.95437
2017-05-17	78.34	3	-4.27298
2017-05-18	77.37	4	-1.24592
2017-05-19	76.56	5	-1.05244
2017-05-22	76.71	1	0.195733
2017-05-23	75.67	2	-1.36503
2017-05-24	74.48	3	-1.58511
2017-05-25	74.78	4	0.401984
2017-05-26	74.44	5	-0.455704
2017-05-29	74.39	1	-0.0671908
2017-05-30	74.39	2	0
2017-05-31	74.58	3	0.255085
2017-06-01	74.31	4	-0.362684
2017-06-02	74.99	5	0.910924
2017-06-05	74.03	1	-1.28844
2017-06-06	73.61	2	-0.568953
2017-06-07	73.26	3	-0.476613
2017-06-08	73.03	4	-0.314444
2017-06-09	73.79	5	1.03529
2017-06-12	72.96	1	-1.13119
2017-06-13	72.41	2	-0.756693
2017-06-14	71.74	3	-0.929594
2017-06-15	70.68	4	-1.48858
2017-06-16	69.11	5	-2.24632
2017-06-19	69.09	1	-0.0289436
2017-06-20	67.72	2	-2.00284
2017-06-21	67.21	3	-0.755951
2017-06-22	65.87	4	-2.01389
2017-06-23	65.63	5	-0.365019
2017-06-26	66.59	1	1.45215
2017-06-27	66.59	2	0
2017-06-28	67.36	3	1.1497
2017-06-29	67.09	4	-0.401637
2017-06-30	66.64	5	-0.673
2017-07-03	67.94	1	1.932
2017-07-04	66.42	2	-2.26267
2017-07-05	66.42	3	0
2017-07-06	66.54	4	0.180505
2017-07-07	67.01	5	0.703859
2017-07-10	67.29	1	0.416978
2017-07-11	65.26	2	-3.06323
2017-07-12	65.64	3	0.580598
2017-07-13	65.49	4	-0.228781
2017-07-14	65.49	5	0
2017-07-17	64.59	1	-1.38379
2017-07-18	64.59	2	0
2017-07-19	66.22	3	2.49229
2017-07-20	66.15	4	-0.105764
2017-07-21	66.71	5	0.842998
2017-07-24	66.35	1	-0.541111
2017-07-25	66.18	2	-0.256546
2017-07-26	66.71	3	0.797656
2017-07-27	66.19	4	-0.782547
2017-07-28	67.46	5	1.90054
2017-07-31	67.19	1	-0.40104
2017-08-01	67.49	2	0.445501
2017-08-02	68.16	3	0.987844
2017-08-03	68.86	4	1.02176
2017-08-04	68.71	5	-0.218071
2017-08-07	68.17	1	-0.789016
2017-08-08	68.41	2	0.351443
2017-08-09	69.19	3	1.13373
2017-08-10	69.12	4	-0.101222
2017-08-11	66.94	5	-3.20474
2017-08-14	66.92	1	-0.029882
2017-08-15	66.92	2	0
2017-08-16	65.52	3	-2.11424
2017-08-17	65.43	4	-0.137457
2017-08-18	65.36	5	-0.107042
2017-08-21	65.67	1	0.473175
2017-08-22	66.61	2	1.42125
2017-08-23	66.81	3	0.299805
2017-08-24	67.71	4	1.33811
2017-08-25	68.26	5	0.809006
2017-08-28	68.15	1	-0.161279
2017-08-29	68.88	2	1.06547
2017-08-30	69.11	3	0.333358
2017-08-31	70.05	4	1.35098
2017-09-01	70.06	5	0.0142745
2017-09-04	70.96	1	1.27643
2017-09-05	70.96	2	0
2017-09-06	73.47	3	3.47608
2017-09-07	73.91	4	0.597098
2017-09-08	72.88	5	-1.40339
2017-09-11	73.35	1	0.642825
2017-09-12	71.79	2	-2.14973
2017-09-13	68.79	3	-4.26868
2017-09-14	67.99	4	-1.16977
2017-09-15	67.84	5	-0.220864
2017-09-18	68.16	1	0.470589
2017-09-19	67.96	2	-0.293859
2017-09-20	67.8	3	-0.23571
2017-09-21	67.75	4	-0.0737735
2017-09-22	66.89	5	-1.2775
2017-09-25	67.04	1	0.223998
2017-09-26	67.86	2	1.21573
2017-09-27	67.21	3	-0.962471
2017-09-28	67.14	4	-0.104205
2017-09-29	67.44	5	0.445832
2017-10-02	66.93	1	-0.759102
2017-10-03	66.23	2	-1.05138
2017-10-04	66.19	3	-0.0604138
2017-10-05	67.25	4	1.58876
2017-10-06	66.87	5	-0.566658
2017-10-09	67.35	1	0.715247
2017-10-10	67.35	2	0
2017-10-11	67.21	3	-0.208086
2017-10-12	67.06	4	-0.22343
2017-10-13	66.14	5	-1.3814
2017-10-16	65.7	1	-0.667478
2017-10-17	65.94	2	0.364631
2017-10-18	65.94	3	0
2017-10-19	65.61	4	-0.501711
2017-10-20	65.24	5	-0.565535
2017-10-23	67.84	1	3.90792
2017-10-24	67.56	2	-0.41359
2017-10-25	67.4	3	-0.237107
2017-10-26	66.53	4	-1.2992
2017-10-27	66.61	5	0.120174
2017-10-30	67.1	1	0.732933
2017-10-31	66.91	2	-0.283561
2017-11-01	66.62	3	-0.43436
2017-11-02	67.34	4	1.07496
2017-11-03	67.09	5	-0.371941
2017-11-06	67.21	1	0.178704
2017-11-07	66.51	2	-1.04697
2017-11-08	67.13	3	0.927873
2017-11-09	66.78	4	-0.52274
2017-11-10	67.5	5	1.0724
2017-11-13	67.5	1	0
2017-11-14	67.5	2	0
2017-11-15	67.18	3	-0.475201
2017-11-16	67.33	4	0.223032
2017-11-17	67.61	5	0.415
2017-11-20	67.57	1	-0.0591804
2017-11-21	68.79	2	1.78943
2017-11-22	68.17	3	-0.90538
2017-11-23	68.96	4	1.1522
2017-11-24	68.96	5	0
2017-11-27	69.74	1	1.12474
2017-11-28	69.3	2	-0.632914
2017-11-29	69.89	3	0.847767
2017-11-30	71.16	4	1.80083
2017-12-01	70.65	5	-0.719275
2017-12-04	70.65	1	0
2017-12-05	70.65	2	0
2017-12-06	70.54	3	-0.155818
2017-12-07	70.76	4	0.311394
2017-12-08	72.2	5	2.01462
2017-12-11	71.62	1	-0.806568
2017-12-12	70.96	2	-0.925803
2017-12-13	70.9	3	-0.0845904
2017-12-14	71.99	4	1.52568
2017-12-15	73.13	5	1.57115
2017-12-18	73.69	1	0.762843
2017-12-19	73.07	2	-0.844922
2017-12-20	72.95	3	-0.164361
2017-12-21	73.65	4	0.954987
2017-12-22	75.67	5	2.70576
2017-12-25	75.48	1	-0.251406
2017-12-26	75.48	2	0
2017-12-27	75.13	3	-0.464777
2017-12-28	76.61	4	1.95077
2017-12-29	76.36	5	-0.326862
2018-01-01	76.24	1	-0.157274
2018-01-02	76.24	2	0
2018-01-03	75.21	3	-1.36021
2018-01-04	75.69	4	0.636185
2018-01-05	76.71	5	1.3386
2018-01-08	75.61	1	-1.44435
2018-01-09	75.71	2	0.13217
2018-01-10	75.79	3	0.105611
2018-01-11	77.11	4	1.72666
2018-01-12	79.96	5	3.62935
2018-01-15	78.91	1	-1.32185
2018-01-16	78.66	2	-0.31732
2018-01-17	79.03	3	0.469276
2018-01-18	79.56	4	0.668393
2018-01-19	80.3	5	0.925817
2018-01-22	80.29	1	-0.0124541
2018-01-23	79.19	2	-1.37951
2018-01-24	79.37	3	0.227043
2018-01-25	79.13	4	-0.302839
2018-01-26	77.91	5	-1.55378
2018-01-29	75.83	1	-2.70603
2018-01-30	74.52	2	-1.74264
2018-01-31	74.7	3	0.241255
2018-02-01	75.61	4	1.21085
2018-02-02	74.64	5	-1.2912
2018-02-05	73.98	1	-0.888177
2018-02-06	73.71	2	-0.365631
2018-02-07	73.58	3	-0.176523
2018-02-08	74.19	4	0.825612
2018-02-09	74.24	5	0.0673718
2018-02-12	74.24	1	0
2018-02-13	74.11	2	-0.175261
2018-02-14	73.99	3	-0.162053
2018-02-15	73.21	4	-1.05979
2018-02-16	72.91	5	-0.410622
2018-02-19	73.47	1	0.765136
2018-02-20	73.47	2	0
2018-02-21	75.26	3	2.40716
2018-02-22	76.53	4	1.6734
2018-02-23	75.73	5	-1.05084
2018-02-26	77.81	1	2.70956
2018-02-27	78.54	2	0.933809
2018-02-28	78.68	3	0.178094
2018-03-01	79.38	4	0.885745
2018-03-02	78.58	5	-1.01292
2018-03-05	78.92	1	0.431747
2018-03-06	82.16	2	4.02339
2018-03-07	79.38	3	-3.44221
2018-03-08	79.83	4	0.565293
2018-03-09	82.09	5	2.79168
2018-03-12	81.44	1	-0.794965
2018-03-13	80.2	2	-1.5343
2018-03-14	79.91	3	-0.362251
2018-03-15	80.39	4	0.598879
2018-03-16	80.45	5	0.0746083
2018-03-19	80.45	1	0
2018-03-20	78.06	2	-3.01581
2018-03-21	79.88	3	2.30477
2018-03-22	79.39	4	-0.615309
2018-03-23	78.86	5	-0.669829
2018-03-26	78.63	1	-0.292082
2018-03-27	78.59	2	-0.0508841
2018-03-28	78.76	3	0.216079
2018-03-29	77.49	4	-1.62564
2018-03-30	78.22	5	0.937647
2018-04-02	78.22	1	0
2018-04-03	77.73	2	-0.628409
2018-04-04	78.76	3	1.3164
2018-04-05	76.35	4	-3.10772
2018-04-06	78.87	5	3.24729
2018-04-09	78.92	1	0.0633754
2018-04-10	79.19	2	0.341535
2018-04-11	79.77	3	0.729747
2018-04-12	80.06	4	0.362886
2018-04-13	79.81	5	-0.312754
2018-04-16	79.46	1	-0.439506
2018-04-17	79.46	2	0
2018-04-18	79.46	3	0
2018-04-19	79.86	4	0.502135
2018-04-20	79.01	5	-1.07007
2018-04-23	80.95	1	2.42573
2018-04-24	80.51	2	-0.545028
2018-04-25	77.94	3	-3.24421
2018-04-26	80.39	4	3.09505
2018-04-27	80.55	5	0.198832
2018-04-30	79.74	1	-1.01068
2018-05-01	80.27	2	0.662461
2018-05-02	80.41	3	0.174259
2018-05-03	80.14	4	-0.336344
2018-05-04	80.14	5	0
2018-05-07	80.14	1	0
2018-05-08	81.2	2	1.31401
2018-05-09	81.61	3	0.503656
2018-05-10	80.33	4	-1.58087
2018-05-11	80.3	5	-0.0373529
2018-05-14	80.3	1	0
2018-05-15	80.3	2	0
2018-05-16	79.69	3	-0.762551
2018-05-17	80.32	4	0.787455
2018-05-18	81.02	5	0.867738
2018-05-21	82.32	1	1.59181
2018-05-22	83.87	2	1.86539
2018-05-23	82.96	3	-1.09094
2018-05-24	82.61	4	-0.422783
2018-05-25	82.94	5	0.398672
2018-05-28	84.29	1	1.61458
2018-05-29	84.29	2	0
2018-05-30	88.29	3	4.63636
2018-05-31	87.71	4	-0.659093
2018-06-01	88.39	5	0.772292
2018-06-04	88.5	1	0.124371
2018-06-05	87.29	2	-1.37666
2018-06-06	85.31	3	-2.29442
2018-06-07	86.54	4	1.43151
2018-06-08	89.3	5	3.13948
2018-06-11	89.3	1	0
2018-06-12	90.39	2	1.21322
2018-06-13	90.94	3	0.606631
2018-06-14	90.94	4	0
2018-06-15	89.58	5	-1.50679
2018-06-18	86.94	1	-2.99139
2018-06-19	85.04	2	-2.20965
2018-06-20	81.76	3	-3.93336
2018-06-21	81.76	4	0
2018-06-22	81.64	5	-0.146879
2018-06-25	82.41	1	0.938745
2018-06-26	82.41	2	0
2018-06-27	81.85	3	-0.681848
2018-06-28	82.19	4	0.414534
2018-06-29	80.91	5	-1.56962
2018-07-02	81.41	1	0.616069
2018-07-03	80.41	2	-1.23596
2018-07-04	80.43	3	0.0248694
2018-07-05	80.43	4	0
2018-07-06	79.44	5	-1.23852
2018-07-09	82.99	1	4.37181
2018-07-10	83.93	2	1.1263
2018-07-11	81.74	3	-2.64396
2018-07-12	85.67	4	4.69592
2018-07-13	85.21	5	-0.538391
2018-07-16	85.2	1	-0.0117364
2018-07-17	85.5	2	0.351494
2018-07-18	85.16	3	-0.398454
2018-07-19	84.64	4	-0.612487
2018-07-20	84.1	5	-0.64004
2018-07-23	83.91	1	-0.226177
2018-07-24	83.8	2	-0.131179
2018-07-25	85.07	3	1.50414
2018-07-26	85.31	4	0.281723
2018-07-27	85.33	5	0.0234412
2018-07-30	86.18	1	0.991204
2018-07-31	86.49	2	0.359067
2018-08-01	85.27	3	-1.42061
2018-08-02	85.65	4	0.444653
2018-08-03	84.88	5	-0.903073
2018-08-06	84.88	1	0
2018-08-07	84.9	2	0.0235599
2018-08-08	84.43	3	-0.55513
2018-08-09	83.6	4	-0.987927
2018-08-10	83.47	5	-0.155623
2018-08-13	82.07	1	-1.69147
2018-08-14	79.35	2	-3.37041
2018-08-15	79.62	3	0.339687
2018-08-16	77.29	4	-2.97007
2018-08-17	78.34	5	1.34937
2018-08-20	78.34	1	0
2018-08-21	79.31	2	1.23059
2018-08-22	79.71	3	0.503082
2018-08-23	78.73	4	-1.23708
2018-08-24	77.94	5	-1.0085
2018-08-27	78.1	1	0.205076
2018-08-28	78.91	2	1.03179
2018-08-29	80.1	3	1.49679
2018-08-30	79.26	4	-1.05423
[truncated: 931 more rows]

## Sheet: Oats
2010-12-31	3.9
2011-01-03	3.91	1	0.256082
2011-01-04	4.08	2	4.25596
2011-01-05	4.04	3	-0.98523
2011-01-06	3.99	4	-1.24535
2011-01-07	3.88	5	-2.79561
2011-01-10	3.81	1	-1.8206
2011-01-11	3.88	2	1.8206
2011-01-12	3.92	3	1.02565
2011-01-13	4.05	4	3.26252
2011-01-14	4.07	5	0.492612
2011-01-17	4.07	1	0
2011-01-18	4.02	2	-1.23611
2011-01-19	4.08	3	1.48151
2011-01-20	3.97	4	-2.73309
2011-01-21	3.92	5	-1.26744
2011-01-24	3.96	1	1.01524
2011-01-25	3.96	2	0
2011-01-26	3.91	3	-1.27067
2011-01-27	3.98	4	1.77444
2011-01-28	4	5	0.501254
2011-01-31	3.96	1	-1.00503
2011-02-01	4.06	2	2.49389
2011-02-02	4.06	3	0
2011-02-03	4.24	4	4.33803
2011-02-04	4.26	5	0.470589
2011-02-07	4.26	1	0
2011-02-08	4.31	2	1.16687
2011-02-09	4.2	3	-2.58534
2011-02-10	4.26	4	1.41846
2011-02-11	4.21	5	-1.18065
2011-02-14	4.21	1	0
2011-02-15	4.14	2	-1.67669
2011-02-16	4.08	3	-1.45988
2011-02-17	4.07	4	-0.245399
2011-02-18	4.18	5	2.66682
2011-02-21	4.18	1	0
2011-02-22	4.13	2	-1.20338
2011-02-23	3.93	3	-4.9638
2011-02-24	3.8	4	-3.36384
2011-02-25	3.65	5	-4.02739
2011-02-28	3.74	1	2.43584
2011-03-01	3.76	2	0.533335
2011-03-02	3.85	3	2.36542
2011-03-03	3.85	4	0
2011-03-04	3.89	5	1.0336
2011-03-07	3.85	1	-1.0336
2011-03-08	3.81	2	-1.0444
2011-03-09	3.7	3	-2.92964
2011-03-10	3.62	4	-2.18588
2011-03-11	3.51	5	-3.0858
2011-03-14	3.46	1	-1.43474
2011-03-15	3.39	2	-2.04387
2011-03-16	3.19	3	-6.0809
2011-03-17	3.1	4	-2.86188
2011-03-18	3.3	5	6.25204
2011-03-21	3.47	1	5.02321
2011-03-22	3.45	2	-0.578036
2011-03-23	3.37	3	-2.34615
2011-03-24	3.35	4	-0.59524
2011-03-25	3.44	5	2.65111
2011-03-28	3.44	1	0
2011-03-29	3.44	2	0
2011-03-30	3.46	3	0.579712
2011-03-31	3.45	4	-0.289436
2011-04-01	3.62	5	4.80998
2011-04-04	3.7	1	2.18588
2011-04-05	3.81	2	2.92964
2011-04-06	3.87	3	1.56253
2011-04-07	3.87	4	0
2011-04-08	3.69	5	-4.7628
2011-04-11	3.89	1	5.27827
2011-04-12	3.97	2	2.03569
2011-04-13	3.86	3	-2.80989
2011-04-14	3.82	4	-1.04168
2011-04-15	3.77	5	-1.31754
2011-04-18	3.78	1	0.264901
2011-04-19	3.83	2	1.31408
2011-04-20	3.89	3	1.55444
2011-04-21	3.83	4	-1.55444
2011-04-22	3.83	5	0
2011-04-25	3.85	1	0.520835
2011-04-26	3.93	2	2.05663
2011-04-27	3.85	3	-2.05663
2011-04-28	3.65	4	-5.3346
2011-04-29	3.34	5	-8.87564
2011-05-02	3.38	1	1.19049
2011-05-03	3.29	2	-2.69881
2011-05-04	3.3	3	0.30349
2011-05-05	3.32	4	0.604231
2011-05-06	3.2	5	-3.6814
2011-05-09	3.29	1	2.77368
2011-05-10	3.45	2	4.74867
2011-05-11	3.47	3	0.578036
2011-05-12	3.37	4	-2.92418
2011-05-13	3.42	5	1.47278
2011-05-16	3.4	1	-0.586512
2011-05-17	3.43	2	0.878483
2011-05-18	3.52	3	2.59007
2011-05-19	3.62	4	2.8013
2011-05-20	3.59	5	-0.832182
2011-05-23	3.59	1	0
2011-05-24	3.56	2	-0.839166
2011-05-25	3.55	3	-0.281294
2011-05-26	3.64	4	2.50361
2011-05-27	3.73	5	2.44246
2011-05-30	3.73	1	0
2011-05-31	3.78	2	1.33158
2011-06-01	3.81	3	0.790518
2011-06-02	3.78	4	-0.790518
2011-06-03	3.75	5	-0.796817
2011-06-06	3.73	1	-0.534761
2011-06-07	3.67	2	-1.62166
2011-06-08	3.66	3	-0.272851
2011-06-09	3.78	4	3.22609
2011-06-10	3.95	5	4.39916
2011-06-13	3.96	1	0.252845
2011-06-14	4.06	2	2.49389
2011-06-15	3.93	3	-3.25435
2011-06-16	3.73	4	-5.22312
2011-06-17	3.61	5	-3.27005
2011-06-20	3.57	1	-1.11422
2011-06-21	3.55	2	-0.561799
2011-06-22	3.59	3	1.12046
2011-06-23	3.62	4	0.832182
2011-06-24	3.59	5	-0.832182
2011-06-27	3.46	1	-3.68836
2011-06-28	3.43	2	-0.870833
2011-06-29	3.5	3	2.02027
2011-06-30	3.55	4	1.41846
2011-07-01	3.44	5	-3.14761
2011-07-04	3.44	1	0
2011-07-05	3.4	2	-1.1696
2011-07-06	3.4	3	0
2011-07-07	3.35	4	-1.48151
2011-07-08	3.41	5	1.77519
2011-07-11	3.46	1	1.45563
2011-07-12	3.58	2	3.40942
2011-07-13	3.66	3	2.21003
2011-07-14	3.73	4	1.89451
2011-07-15	3.7	5	-0.807541
2011-07-18	3.65	1	-1.36057
2011-07-19	3.63	2	-0.549452
2011-07-20	3.64	3	0.275103
2011-07-21	3.64	4	0
2011-07-22	3.62	5	-0.550966
2011-07-25	3.63	1	0.275862
2011-07-26	3.62	2	-0.275862
2011-07-27	3.62	3	0
2011-07-28	3.66	4	1.09891
2011-07-29	3.61	5	-1.37554
2011-08-01	3.56	1	-1.39472
2011-08-02	3.57	2	0.280505
2011-08-03	3.65	3	2.21616
2011-08-04	3.57	4	-2.21616
2011-08-05	3.48	5	-2.55333
2011-08-08	3.51	1	0.858374
2011-08-09	3.47	2	-1.14614
2011-08-10	3.5	3	0.860837
2011-08-11	3.56	4	1.69976
2011-08-12	3.6	5	1.11733
2011-08-15	3.6	1	0
2011-08-16	3.63	2	0.82988
2011-08-17	3.65	3	0.549452
2011-08-18	3.64	4	-0.274349
2011-08-19	3.58	5	-1.66209
2011-08-22	3.63	1	1.38698
2011-08-23	3.68	2	1.36801
2011-08-24	3.78	3	2.68113
2011-08-25	3.73	4	-1.33158
2011-08-26	3.83	5	2.64566
2011-08-29	3.93	1	2.57746
2011-08-30	3.89	2	-1.02303
2011-08-31	3.79	3	-2.60431
2011-09-01	3.77	4	-0.529102
2011-09-02	3.67	5	-2.68833
2011-09-05	3.67	1	0
2011-09-06	3.74	2	1.88939
2011-09-07	3.72	3	-0.536194
2011-09-08	3.66	4	-1.62605
2011-09-09	3.58	5	-2.21003
2011-09-12	3.53	1	-1.40649
2011-09-13	3.5	2	-0.85349
2011-09-14	3.49	3	-0.286123
2011-09-15	3.52	4	0.855925
2011-09-16	3.49	5	-0.855925
2011-09-19	3.51	1	0.57143
2011-09-20	3.51	2	0
2011-09-21	3.54	3	0.851069
2011-09-22	3.55	4	0.282088
2011-09-23	3.42	5	-3.73071
2011-09-26	3.37	1	-1.47278
2011-09-27	3.35	2	-0.59524
2011-09-28	3.4	3	1.48151
2011-09-29	3.35	4	-1.48151
2011-09-30	3.38	5	0.891536
2011-10-03	3.33	1	-1.49034
2011-10-04	3.33	2	0
2011-10-05	3.3	3	-0.904984
2011-10-06	3.3	4	0
2011-10-07	3.3	5	0
2011-10-10	3.3	1	0
2011-10-11	3.26	2	-1.21953
2011-10-12	3.44	3	5.37443
2011-10-13	3.5	4	1.72915
2011-10-14	3.47	5	-0.860837
2011-10-17	3.45	1	-0.578036
2011-10-18	3.45	2	0
2011-10-19	3.44	3	-0.290276
2011-10-20	3.42	4	-0.583092
2011-10-21	3.42	5	0
2011-10-24	3.42	1	0
2011-10-25	3.46	2	1.1628
2011-10-26	3.42	3	-1.1628
2011-10-27	3.35	4	-2.06802
2011-10-28	3.39	5	1.18696
2011-10-31	3.41	1	0.588237
2011-11-01	3.4	2	-0.293686
2011-11-02	3.4	3	0
2011-11-03	3.4	4	0
2011-11-04	3.37	5	-0.886269
2011-11-07	3.34	1	-0.894194
2011-11-08	3.3	2	-1.20483
2011-11-09	3.33	3	0.904984
2011-11-10	3.29	4	-1.20847
2011-11-11	3.29	5	0
2011-11-14	3.27	1	-0.609758
2011-11-15	3.24	2	-0.921666
2011-11-16	3.27	3	0.921666
2011-11-17	3.23	4	-1.23078
2011-11-18	3.05	5	-5.73405
2011-11-21	3.09	1	1.30295
2011-11-22	3.05	2	-1.30295
2011-11-23	3.09	3	1.30295
2011-11-24	3.09	4	0
2011-11-25	3	5	-2.95588
2011-11-28	3.02	1	0.664454
2011-11-29	3.02	2	0
2011-11-30	3.02	3	0
2011-12-01	3.42	4	12.4384
2011-12-02	3.35	5	-2.06802
2011-12-05	3.3	1	-1.50379
2011-12-06	3.22	2	-2.45411
2011-12-07	3.19	3	-0.936044
2011-12-08	3.13	4	-1.89879
2011-12-09	3.17	5	1.26986
2011-12-12	3.17	1	0
2011-12-13	3.22	2	1.56498
2011-12-14	3.25	3	0.927364
2011-12-15	3.17	4	-2.49234
2011-12-16	3.14	5	-0.950879
2011-12-19	3.16	1	0.634923
2011-12-20	3.22	2	1.88093
2011-12-21	3.24	3	0.619197
2011-12-22	3.26	4	0.615387
2011-12-23	3.26	5	0
2011-12-26	3.27	1	0.306279
2011-12-27	3.27	2	0
2011-12-28	3.33	3	1.81823
2011-12-29	3.32	4	-0.300752
2011-12-30	3.21	5	-3.36938
2012-01-02	3.21	1	0
2012-01-03	3.28	2	2.15725
2012-01-04	3.14	3	-4.36206
2012-01-05	3.08	4	-1.92932
2012-01-06	3.05	5	-0.978801
2012-01-09	3.02	1	-0.988476
2012-01-10	3.11	2	2.93659
2012-01-11	3.14	3	0.960007
2012-01-12	3.14	4	0
2012-01-13	2.99	5	-4.89494
2012-01-16	2.98	1	-0.335009
2012-01-17	2.98	2	0
2012-01-18	3.02	3	1.33335
2012-01-19	2.99	4	-0.998344
2012-01-20	3.08	5	2.96562
2012-01-23	3.1	1	0.647251
2012-01-24	3.11	2	0.322061
2012-01-25	3.1	3	-0.322061
2012-01-26	3.13	4	0.963089
2012-01-27	3.16	5	0.953902
2012-01-30	3.14	1	-0.634923
2012-01-31	3.07	2	-2.25452
2012-02-01	3.13	3	1.93554
2012-02-02	3.2	4	2.21178
2012-02-03	3.23	5	0.933133
2012-02-06	3.29	1	1.84054
2012-02-07	3.42	2	3.8753
2012-02-08	3.43	3	0.291971
2012-02-09	3.43	4	0
2012-02-10	3.33	5	-2.9588
2012-02-13	3.33	1	0
2012-02-14	3.4	2	2.08031
2012-02-15	3.38	3	-0.589972
2012-02-16	3.4	4	0.589972
2012-02-17	3.39	5	-0.294551
2012-02-20	3.39	1	0
2012-02-21	3.39	2	0
2012-02-22	3.36	3	-0.888895
2012-02-23	3.34	4	-0.597017
2012-02-24	3.36	5	0.597017
2012-02-27	3.4	1	1.18345
2012-02-28	3.4	2	0
2012-02-29	3.41	3	0.293686
2012-03-01	3.35	4	-1.77519
2012-03-02	3.29	5	-1.80728
2012-03-05	3.26	1	-0.916037
2012-03-06	3.28	2	0.611623
2012-03-07	3.24	3	-1.22701
2012-03-08	3.19	4	-1.55524
2012-03-09	3.08	5	-3.50913
2012-03-12	3.08	1	0
2012-03-13	3.23	2	4.75525
2012-03-14	3.28	3	1.53613
2012-03-15	3.31	4	0.910477
2012-03-16	3.49	5	5.29535
2012-03-19	3.54	1	1.4225
2012-03-20	3.54	2	0
2012-03-21	3.51	3	-0.851069
2012-03-22	3.46	4	-1.43474
2012-03-23	3.48	5	0.57637
2012-03-26	3.53	1	1.42656
2012-03-27	3.53	2	0
2012-03-28	3.6	3	1.9636
2012-03-29	3.62	4	0.554018
2012-03-30	3.61	5	-0.276625
2012-04-02	3.6	1	-0.277393
2012-04-03	3.6	2	0
2012-04-04	3.61	3	0.277393
2012-04-05	3.65	4	1.10194
2012-04-06	3.65	5	0
2012-04-09	3.67	1	0.546449
2012-04-10	3.68	2	0.272109
2012-04-11	3.63	3	-1.36801
2012-04-12	3.59	4	-1.10804
2012-04-13	3.64	5	1.38315
2012-04-16	3.58	1	-1.66209
2012-04-17	3.53	2	-1.40649
2012-04-18	3.51	3	-0.568183
2012-04-19	3.51	4	0
2012-04-20	3.53	5	0.568183
2012-04-23	3.52	1	-0.283688
2012-04-24	3.56	2	1.12996
2012-04-25	3.7	3	3.85723
2012-04-26	3.69	4	-0.270636
2012-04-27	3.63	5	-1.63938
2012-04-30	3.61	1	-0.552488
2012-05-01	3.66	2	1.37554
2012-05-02	3.65	3	-0.273598
2012-05-03	3.65	4	0
2012-05-04	3.65	5	0
2012-05-07	3.6	1	-1.37933
2012-05-08	3.58	2	-0.557105
2012-05-09	3.58	3	0
2012-05-10	3.56	4	-0.560226
2012-05-11	3.56	5	0
2012-05-14	3.52	1	-1.12996
2012-05-15	3.49	2	-0.855925
2012-05-16	3.5	3	0.286123
2012-05-17	3.58	4	2.25998
2012-05-18	3.59	5	0.27894
2012-05-21	3.6	1	0.278164
2012-05-22	3.62	2	0.554018
2012-05-23	3.54	3	-2.23473
2012-05-24	3.45	4	-2.57525
2012-05-25	3.25	5	-5.97192
2012-05-28	3.25	1	0
2012-05-29	3.3	2	1.52675
2012-05-30	3.3	3	0
2012-05-31	2.91	4	-12.5769
2012-06-01	3.01	5	3.3787
2012-06-04	3.05	1	1.32015
2012-06-05	3.08	2	0.978801
2012-06-06	3.09	3	0.324149
2012-06-07	3.14	4	1.60517
2012-06-08	3.2	5	1.8928
2012-06-11	3.23	1	0.933133
2012-06-12	3.15	2	-2.50797
2012-06-13	3.11	3	-1.27797
2012-06-14	3.21	4	3.16482
2012-06-15	3.21	5	0
2012-06-18	3.23	1	0.62112
2012-06-19	3.31	2	2.44661
2012-06-20	3.4	3	2.68272
2012-06-21	3.4	4	0
2012-06-22	3.29	5	-3.28879
2012-06-25	3.44	1	4.45839
2012-06-26	3.64	2	5.65122
2012-06-27	3.74	3	2.71019
2012-06-28	3.63	4	-2.9853
2012-06-29	3.49	5	-3.93309
2012-07-02	3.51	1	0.57143
2012-07-03	3.72	2	5.81076
2012-07-04	3.72	3	0
2012-07-05	3.8	4	2.12774
2012-07-06	3.9	5	2.59755
2012-07-09	3.82	1	-2.07261
2012-07-10	3.98	2	4.10314
2012-07-11	3.92	3	-1.51902
2012-07-12	3.79	4	-3.37256
2012-07-13	3.86	5	1.83012
2012-07-16	3.88	1	0.516797
2012-07-17	4	2	3.04592
2012-07-18	3.98	3	-0.501254
2012-07-19	4	4	0.501254
2012-07-20	4.04	5	0.995033
2012-07-23	4.07	1	0.739831
2012-07-24	3.92	2	-3.75513
2012-07-25	3.76	3	-4.16727
2012-07-26	3.86	4	2.62482
2012-07-27	3.83	5	-0.780238
2012-07-30	3.9	1	1.81117
2012-07-31	3.98	2	2.03053
2012-08-01	3.93	3	-1.26424
2012-08-02	3.82	4	-2.8389
2012-08-03	3.83	5	0.261438
2012-08-06	3.88	1	1.29704
2012-08-07	3.85	2	-0.776201
2012-08-08	3.82	3	-0.782273
2012-08-09	3.87	4	1.30041
2012-08-10	3.96	5	2.29895
2012-08-13	3.95	1	-0.252845
2012-08-14	3.81	2	-3.60864
2012-08-15	3.79	3	-0.526317
2012-08-16	3.86	4	1.83012
2012-08-17	3.93	5	1.79722
2012-08-20	3.94	1	0.25413
2012-08-21	3.94	2	0
2012-08-22	4.07	3	3.24623
2012-08-23	4.06	4	-0.246003
2012-08-24	4.01	5	-1.23917
2012-08-27	4.02	1	0.249066
2012-08-28	3.97	2	-1.25158
2012-08-29	3.93	3	-1.01267
2012-08-30	4.06	4	3.25435
2012-08-31	4	5	-1.48886
2012-09-03	4	1	0
2012-09-04	4	2	0
2012-09-05	4	3	0
2012-09-06	3.92	4	-2.02027
2012-09-07	3.96	5	1.01524
2012-09-10	3.96	1	0
2012-09-11	3.92	2	-1.01524
2012-09-12	3.93	3	0.254777
2012-09-13	3.92	4	-0.254777
2012-09-14	3.96	5	1.01524
2012-09-17	4.01	1	1.25472
2012-09-18	3.9	2	-2.78147
2012-09-19	3.79	3	-2.86105
2012-09-20	3.81	4	0.526317
2012-09-21	3.78	5	-0.790518
2012-09-24	3.81	1	0.790518
2012-09-25	3.87	2	1.56253
2012-09-26	3.88	3	0.258065
2012-09-27	3.85	4	-0.776201
2012-09-28	3.78	5	-1.83491
2012-10-01	3.81	1	0.790518
2012-10-02	3.77	2	-1.05542
2012-10-03	3.7	3	-1.87422
2012-10-04	3.73	4	0.807541
2012-10-05	3.81	5	2.1221
2012-10-08	3.81	1	0
2012-10-09	3.77	2	-1.05542
2012-10-10	3.88	3	2.87602
2012-10-11	3.94	4	1.53456
2012-10-12	3.99	5	1.26105
2012-10-15	4.02	1	0.749067
2012-10-16	3.98	2	-1.00001
2012-10-17	4.03	3	1.24846
2012-10-18	4.06	4	0.74166
2012-10-19	4.04	5	-0.493828
2012-10-22	4.04	1	0
2012-10-23	4.06	2	0.493828
2012-10-24	3.96	3	-2.49389
2012-10-25	3.97	4	0.252207
2012-10-26	3.98	5	0.251572
2012-10-29	4	1	0.501254
2012-10-30	3.98	2	-0.501254
2012-10-31	3.99	3	0.250941
2012-11-01	3.99	4	0
2012-11-02	3.9	5	-2.28147
2012-11-05	3.77	1	-3.39016
2012-11-06	3.68	2	-2.41622
2012-11-07	3.7	3	0.542007
2012-11-08	3.75	4	1.3423
2012-11-09	3.74	5	-0.267023
2012-11-12	3.74	1	0
2012-11-13	3.83	2	2.37792
2012-11-14	3.74	3	-2.37792
2012-11-15	3.78	4	1.06384
2012-11-16	3.75	5	-0.796817
2012-11-19	3.75	1	0
2012-11-20	3.86	2	2.89113
2012-11-21	3.87	3	0.258732
2012-11-22	3.87	4	0
2012-11-23	3.87	5	0
2012-11-26	3.8	1	-1.82534
2012-11-27	3.79	2	-0.263505
2012-11-28	3.83	3	1.04988
2012-11-29	3.87	4	1.03897
2012-11-30	3.89	5	0.515465
2012-12-03	3.89	1	0
2012-12-04	3.95	2	1.53064
2012-12-05	4	3	1.25788
2012-12-06	4.12	4	2.95588
2012-12-07	4.13	5	0.242424
2012-12-10	4.06	1	-1.70944
2012-12-11	4.04	2	-0.493828
2012-12-12	4.03	3	-0.247832
2012-12-13	4	4	-0.747201
2012-12-14	4	5	0
2012-12-17	4.05	1	1.24225
2012-12-18	4.04	2	-0.247219
2012-12-19	3.96	3	-2.00007
2012-12-20	3.9	4	-1.52675
2012-12-21	3.75	5	-3.92207
2012-12-24	3.75	1	0
2012-12-25	3.75	2	0
2012-12-26	3.8	3	1.32452
2012-12-27	3.75	4	-1.32452
2012-12-28	3.68	5	-1.88431
2012-12-31	3.64	1	-1.09291
2013-01-01	3.64	2	0
2013-01-02	3.64	3	0
2013-01-03	3.51	4	-3.63676
2013-01-04	3.53	5	0.568183
2013-01-07	3.48	1	-1.42656
2013-01-08	3.47	2	-0.28777
2013-01-09	3.47	3	0
2013-01-10	3.52	4	1.43064
2013-01-11	3.6	5	2.24729
2013-01-14	3.67	1	1.92578
2013-01-15	3.74	2	1.88939
2013-01-16	3.77	3	0.798939
2013-01-17	3.77	4	0
2013-01-18	3.75	5	-0.531916
2013-01-21	3.75	1	0
2013-01-22	3.76	2	0.266312
2013-01-23	3.79	3	0.794706
2013-01-24	3.8	4	0.263505
2013-01-25	3.86	5	1.56661
2013-01-28	3.88	1	0.516797
2013-01-29	3.86	2	-0.516797
2013-01-30	3.85	3	-0.259404
2013-01-31	3.87	4	0.518136
2013-02-01	3.85	5	-0.518136
2013-02-04	3.84	1	-0.260078
2013-02-05	3.85	2	0.260078
2013-02-06	3.91	3	1.54642
2013-02-07	4.03	4	3.0229
2013-02-08	4.07	5	0.987662
2013-02-11	4.11	1	0.978003
2013-02-12	4.06	2	-1.22401
2013-02-13	4.03	3	-0.74166
2013-02-14	4.05	4	0.495051
2013-02-15	4.05	5	0
2013-02-18	4.05	1	0
2013-02-19	4.04	2	-0.247219
2013-02-20	4.03	3	-0.247832
2013-02-21	4.13	4	2.4511
2013-02-22	4.14	5	0.241838
2013-02-25	4.13	1	-0.241838
2013-02-26	4.03	2	-2.4511
2013-02-27	4.05	3	0.495051
2013-02-28	4.02	4	-0.743498
2013-03-01	4.07	5	1.23611
2013-03-04	4.1	1	0.734397
2013-03-05	4.14	2	0.970881
2013-03-06	4.19	3	1.20049
2013-03-07	4.14	4	-1.20049
2013-03-08	4.15	5	0.241255
2013-03-11	4.18	1	0.720291
2013-03-12	4.23	2	1.18907
2013-03-13	4.24	3	0.236128
2013-03-14	4.22	4	-0.472814
2013-03-15	4.27	5	1.17787
2013-03-18	4.32	1	1.16416
2013-03-19	4.26	2	-1.39862
2013-03-20	4.26	3	0
2013-03-21	4.29	4	0.701757
2013-03-22	4.29	5	0
2013-03-25	4.29	1	0
2013-03-26	4.29	2	0
2013-03-27	4.29	3	0
2013-03-28	4.29	4	0
2013-03-29	4.29	5	0
2013-04-01	4.29	1	0
2013-04-02	4.06	2	-5.51038
2013-04-03	3.98	3	-1.99012
2013-04-04	3.98	4	0
2013-04-05	3.89	5	-2.28727
2013-04-08	3.9	1	0.25674
2013-04-09	3.94	2	1.02042
2013-04-10	3.98	3	1.01011
2013-04-11	3.99	4	0.250941
2013-04-12	4.04	5	1.24535
2013-04-15	4.04	1	0
2013-04-16	4.04	2	0
2013-04-17	4.04	3	0
2013-04-18	4.04	4	0
2013-04-19	4.04	5	0
2013-04-22	4.22	1	4.35904
2013-04-23	4.31	2	2.11028
2013-04-24	4.27	3	-0.932408
2013-04-25	4.2	4	-1.65293
2013-04-26	4.25	5	1.18345
2013-04-29	4.21	1	-0.945634
2013-04-30	4.41	2	4.6412
2013-05-01	4.37	3	-0.911168
2013-05-02	4.18	4	-4.44518
2013-05-03	4.21	5	0.71514
2013-05-06	4.18	1	-0.71514
2013-05-07	4.09	2	-2.17663
2013-05-08	4.07	3	-0.490197
2013-05-09	4.08	4	0.245399
2013-05-10	4.08	5	0
2013-05-13	4.04	1	-0.98523
2013-05-14	4.07	2	0.739831
2013-05-15	4.09	3	0.490197
2013-05-16	4.05	4	-0.982809
2013-05-17	4.03	5	-0.495051
2013-05-20	4.01	1	-0.497513
2013-05-21	3.83	2	-4.59264
2013-05-22	3.75	3	-2.1109
2013-05-23	3.87	4	3.14987
2013-05-24	3.9	5	0.772205
2013-05-27	3.9	1	0
2013-05-28	3.92	2	0.51151
2013-05-29	3.86	3	-1.54245
2013-05-30	3.83	4	-0.780238
2013-05-31	3.83	5	0
2013-06-03	3.94	1	2.83159
2013-06-04	4	2	1.51136
2013-06-05	4.02	3	0.498754
2013-06-06	4.05	4	0.743498
2013-06-07	4.19	5	3.39839
2013-06-10	4.28	1	2.12523
2013-06-11	4.3	2	0.466201
2013-06-12	4.23	3	-1.6413
2013-06-13	4.23	4	0
2013-06-14	4.28	5	1.1751
2013-06-17	4.2	1	-1.88685
2013-06-18	4.17	2	-0.716849
2013-06-19	4.18	3	0.239521
2013-06-20	4.23	4	1.18907
2013-06-21	4.15	5	-1.90937
2013-06-24	4.14	1	-0.241255
2013-06-25	4.12	2	-0.484262
2013-06-26	4.07	3	-1.22102
2013-06-27	4.04	4	-0.739831
2013-06-28	4.06	5	0.493828
2013-07-01	4.21	1	3.62797
2013-07-02	3.92	2	-7.1371
2013-07-03	3.86	3	-1.54245
2013-07-04	3.86	4	0
2013-07-05	3.91	5	1.28702
2013-07-08	3.95	1	1.01782
2013-07-09	3.92	2	-0.762393
2013-07-10	3.96	3	1.01524
2013-07-11	3.92	4	-1.01524
2013-07-12	3.91	5	-0.255428
2013-07-15	3.87	1	-1.02829
2013-07-16	3.88	2	0.258065
2013-07-17	3.89	3	0.2574
2013-07-18	3.88	4	-0.2574
2013-07-19	3.88	5	0
2013-07-22	3.9	1	0.51414
2013-07-23	3.92	2	0.51151
2013-07-24	3.88	3	-1.02565
2013-07-25	3.81	4	-1.8206
2013-07-26	3.73	5	-2.1221
2013-07-29	3.66	1	-1.89451
2013-07-30	3.71	2	1.35687
2013-07-31	3.73	3	0.537636
2013-08-01	3.75	4	0.534761
2013-08-02	3.75	5	0
2013-08-05	3.74	1	-0.267023
2013-08-06	3.71	2	-0.805373
2013-08-07	3.75	3	1.0724
2013-08-08	3.87	4	3.14987
2013-08-09	3.97	5	2.55116
2013-08-12	3.94	1	-0.758537
2013-08-13	3.97	2	0.758537
2013-08-14	3.96	3	-0.252207
2013-08-15	4.01	4	1.25472
2013-08-16	4.08	5	1.73057
2013-08-19	4.03	1	-1.23306
2013-08-20	4.1	2	1.72206
2013-08-21	4.02	3	-1.97051
2013-08-22	3.91	4	-2.77445
2013-08-23	3.83	5	-2.06726
2013-08-26	3.83	1	0
2013-08-27	3.7	2	-3.4532
2013-08-28	3.75	3	1.3423
2013-08-29	3.74	4	-0.267023
2013-08-30	3.73	5	-0.267738
2013-09-02	3.73	1	0
2013-09-03	3.66	2	-1.89451
2013-09-04	3.55	3	-3.05155
2013-09-05	3.53	4	-0.564973
2013-09-06	3.51	5	-0.568183
2013-09-09	3.45	1	-1.72418
2013-09-10	3.39	2	-1.75443
2013-09-11	3.44	3	1.46415
2013-09-12	3.47	4	0.868312
2013-09-13	3.43	5	-1.15943
2013-09-16	3.37	1	-1.76475
2013-09-17	3.37	2	0
2013-09-18	3.32	3	-1.4948
2013-09-19	3.29	4	-0.907722
2013-09-20	3.37	5	2.40252
2013-09-23	3.34	1	-0.894194
2013-09-24	3.35	2	0.298954
2013-09-25	3.36	3	0.298063
2013-09-26	3.39	4	0.888895
2013-09-27	3.54	5	4.32968
2013-09-30	3.52	1	-0.566574
2013-10-01	3.54	2	0.566574
2013-10-02	3.54	3	0
2013-10-03	3.54	4	0
2013-10-04	3.54	5	0
2013-10-07	3.54	1	0
2013-10-08	3.54	2	0
2013-10-09	3.54	3	0
2013-10-10	3.54	4	0
2013-10-11	3.54	5	0
2013-10-14	3.54	1	0
2013-10-15	3.54	2	0
2013-10-16	3.54	3	0
2013-10-17	3.54	4	0
2013-10-18	3.67	5	3.60649
2013-10-21	3.71	1	1.08402
2013-10-22	3.72	2	0.269179
2013-10-23	3.76	3	1.06953
2013-10-24	3.8	4	1.05821
2013-10-25	3.79	5	-0.263505
2013-10-28	3.68	1	-2.94533
2013-10-29	3.63	2	-1.36801
2013-10-30	3.61	3	-0.552488
2013-10-31	3.68	4	1.9205
2013-11-01	3.65	5	-0.818558
2013-11-04	3.65	1	0
2013-11-05	3.67	2	0.546449
2013-11-06	3.75	3	2.15642
2013-11-07	3.79	4	1.06102
2013-11-08	3.74	5	-1.32804
2013-11-11	3.74	1	0
2013-11-12	3.7	2	-1.07528
2013-11-13	3.72	3	0.539085
2013-11-14	3.7	4	-0.539085
2013-11-15	3.75	5	1.3423
2013-11-18	3.78	1	0.796817
2013-11-19	3.79	2	0.264201
2013-11-20	3.9	3	2.86105
2013-11-21	3.95	4	1.2739
2013-11-22	3.94	5	-0.253486
2013-11-25	4.04	1	2.5064
2013-11-26	4.16	2	2.92704
2013-11-27	4.19	3	0.718566
2013-11-28	4.19	4	0
2013-11-29	4.21	5	0.476191
2013-12-02	4	1	-5.11683
2013-12-03	3.95	2	-1.25788
2013-12-04	4.03	3	2.00508
2013-12-05	3.97	4	-1.50003
2013-12-06	3.9	5	-1.77895
2013-12-09	3.83	1	-1.81117
2013-12-10	3.87	2	1.03897
2013-12-11	3.91	3	1.02829
2013-12-12	3.95	4	1.01782
2013-12-13	3.95	5	0
2013-12-16	3.75	1	-5.19597
2013-12-17	3.81	2	1.58733
2013-12-18	3.81	3	0
2013-12-19	3.9	4	2.33474
2013-12-20	3.8	5	-2.59755
2013-12-23	3.84	1	1.04713
2013-12-24	3.87	2	0.778214
2013-12-25	3.87	3	0
2013-12-26	3.87	4	0
2013-12-27	3.88	5	0.258065
2013-12-30	3.91	1	0.770222
2013-12-31	3.89	2	-0.512822
2014-01-01	3.89	3	0
2014-01-02	3.89	4	0
2014-01-03	3.86	5	-0.774197
2014-01-06	3.79	1	-1.83012
2014-01-07	3.86	2	1.83012
2014-01-08	3.99	3	3.3124
2014-01-09	4.12	4	3.20619
2014-01-10	4.3	5	4.27619
2014-01-13	4.22	1	-1.87799
2014-01-14	4.28	2	1.41179
2014-01-15	4.25	3	-0.703403
2014-01-16	4.28	4	0.703403
2014-01-17	4.35	5	1.62228
2014-01-20	4.35	1	0
2014-01-21	4.35	2	0
2014-01-22	4.34	3	-0.23015
2014-01-23	4.35	4	0.23015
2014-01-24	4.24	5	-2.56126
2014-01-27	4.36	1	2.79088
2014-01-28	4.46	2	2.26767
2014-01-29	4.67	3	4.60103
2014-01-30	4.76	4	1.90886
2014-01-31	4.67	5	-1.90886
2014-02-03	4.61	1	-1.29312
2014-02-04	4.7	2	1.93347
2014-02-05	4.8	3	2.10534
2014-02-06	4.98	4	3.6814
2014-02-07	5.12	5	2.77245
2014-02-10	4.87	1	-5.00605
2014-02-11	4.74	2	-2.70568
2014-02-12	4.79	3	1.04933
2014-02-13	4.68	4	-2.32323
2014-02-14	4.68	5	0
2014-02-17	4.68	1	0
2014-02-18	4.74	2	1.2739
2014-02-19	4.74	3	0
2014-02-20	4.84	4	2.08776
2014-02-21	4.94	5	2.04506
2014-02-24	4.82	1	-2.45914
2014-02-25	4.88	2	1.23713
2014-02-26	4.98	3	2.02847
2014-02-27	4.98	4	0
2014-02-28	4.94	5	-0.806456
2014-03-03	4.93	1	-0.202634
2014-03-04	4.93	2	0
2014-03-05	5.24	3	6.09825
2014-03-06	5.04	4	-3.89154
2014-03-07	4.91	5	-2.61321
2014-03-10	4.66	1	-5.22585
2014-03-11	4.43	2	-5.06159
2014-03-12	4.45	3	0.450451
2014-03-13	4.65	4	4.39631
2014-03-14	4.65	5	0
2014-03-17	4.74	1	1.91699
2014-03-18	4.88	2	2.91081
2014-03-19	4.66	3	-4.61298
2014-03-20	4.55	4	-2.38882
2014-03-21	4.35	5	-4.49514
2014-03-24	4.4	1	1.14287
2014-03-25	4.48	2	1.80185
2014-03-26	4.32	3	-3.63676
2014-03-27	4.4	4	1.83491
2014-03-28	4.52	5	2.69075
2014-03-31	4.47	1	-1.11236
2014-04-01	4.44	2	-0.673403
2014-04-02	4.56	3	2.66682
2014-04-03	4.54	4	-0.439561
2014-04-04	4.6	5	1.31293
2014-04-07	4.56	1	-0.873368
2014-04-08	4.64	2	1.73917
2014-04-09	4.8	3	3.39016
2014-04-10	4.69	4	-2.31833
2014-04-11	4.5	5	-4.13552
2014-04-14	4.49	1	-0.22247
2014-04-15	4.49	2	0
2014-04-16	4.44	3	-1.11983
2014-04-17	4.5	4	1.3423
2014-04-18	4.49	5	-0.22247
2014-04-21	4.49	1	0
2014-04-22	4.4	2	-2.02482
2014-04-23	4.51	3	2.46926
2014-04-24	4.54	4	0.662986
2014-04-25	4.47	5	-1.55386
2014-04-28	4.48	1	0.223464
2014-04-29	4.68	2	4.36751
2014-04-30	4.67	3	-0.213904
2014-05-01	4.64	4	-0.644471
2014-05-02	4.63	5	-0.21575
2014-05-05	4.63	1	0
2014-05-06	4.63	2	0
2014-05-07	4.63	3	0
2014-05-08	4.41	4	-4.86822
2014-05-09	4.33	5	-1.83071
2014-05-12	4.33	1	0
2014-05-13	4.27	2	-1.39537
2014-05-14	4.16	3	-2.60988
2014-05-15	4.11	4	-1.2092
2014-05-16	4.01	5	-2.46318
2014-05-19	3.97	1	-1.00251
2014-05-20	3.94	2	-0.758537
2014-05-21	3.84	3	-2.57084
2014-05-22	3.91	4	1.8065
2014-05-23	3.96	5	1.27067
2014-05-26	3.96	1	0
2014-05-27	3.98	2	0.503779
2014-05-28	3.9	3	-2.03053
2014-05-29	4	4	2.53178
2014-05-30	4.12	5	2.95588
2014-06-02	4.21	1	2.16095
2014-06-03	4.21	2	0
2014-06-04	4.09	3	-2.89177
2014-06-05	4.11	4	0.487806
2014-06-06	4.06	5	-1.22401
2014-06-09	4.07	1	0.246003
2014-06-10	3.93	2	-3.50036
2014-06-11	3.93	3	0
2014-06-12	4.27	4	8.29744
2014-06-13	3.85	5	-10.3541
2014-06-16	3.87	1	0.518136
2014-06-17	3.83	2	-1.03897
2014-06-18	3.78	3	-1.31408
2014-06-19	3.83	4	1.31408
2014-06-20	3.87	5	1.03897
2014-06-23	3.8	1	-1.82534
2014-06-24	3.77	2	-0.792607
2014-06-25	3.8	3	0.792607
2014-06-26	3.75	4	-1.32452
2014-06-27	3.76	5	0.266312
2014-06-30	3.77	1	0.265604
2014-07-01	3.83	2	1.57898
2014-07-02	3.91	3	2.06726
2014-07-03	3.97	4	1.52287
2014-07-04	3.97	5	0
2014-07-07	4.01	1	1.00251
2014-07-08	4.21	2	4.86714
2014-07-09	4	3	-5.11683
2014-07-10	3.88	4	-3.04592
2014-07-11	3.87	5	-0.258065
2014-07-14	3.79	1	-2.08885
2014-07-15	3.84	2	1.31063
2014-07-16	3.84	3	0
2014-07-17	3.89	4	1.29368
2014-07-18	3.87	5	-0.515465
2014-07-21	3.82	1	-1.30041
2014-07-22	3.82	2	0
2014-07-23	3.8	3	-0.524936
2014-07-24	3.83	4	0.786374
2014-07-25	3.87	5	1.03897
2014-07-28	3.98	1	2.80273
2014-07-29	4.17	2	4.66342
2014-07-30	4.07	3	-2.4273
2014-07-31	3.95	4	-2.99274
2014-08-01	3.86	5	-2.30484
2014-08-04	3.76	1	-2.62482
2014-08-05	3.76	2	0
2014-08-06	3.78	3	0.530505
2014-08-07	3.85	4	1.83491
2014-08-08	3.82	5	-0.782273
2014-08-11	3.76	1	-1.58315
2014-08-12	3.76	2	0
2014-08-13	3.78	3	0.530505
2014-08-14	3.77	4	-0.264901
2014-08-15	3.78	5	0.264901
2014-08-18	3.74	1	-1.06384
2014-08-19	3.79	2	1.32804
2014-08-20	3.8	3	0.263505
2014-08-21	3.8	4	0
2014-08-22	3.88	5	2.08341
2014-08-25	3.95	1	1.78804
2014-08-26	3.92	2	-0.762393
2014-08-27	3.85	3	-1.80185
2014-08-28	3.81	4	-1.0444
2014-08-29	3.81	5	0
2014-09-01	3.81	1	0
2014-09-02	3.81	2	0
2014-09-03	3.81	3	0
2014-09-04	3.81	4	0
2014-09-05	3.81	5	0
2014-09-08	3.81	1	0
2014-09-09	3.81	2	0
2014-09-10	3.81	3	0
2014-09-11	3.81	4	0
2014-09-12	3.81	5	0
2014-09-15	3.81	1	0
2014-09-16	3.81	2	0
2014-09-17	3.81	3	0
2014-09-18	3.81	4	0
2014-09-19	3.81	5	0
2014-09-22	3.81	1	0
2014-09-23	3.81	2	0
2014-09-24	3.81	3	0
2014-09-25	3.91	4	2.59082
2014-09-26	3.81	5	-2.59082
2014-09-29	3.79	1	-0.526317
2014-09-30	3.84	2	1.31063
2014-10-01	3.86	3	0.519482
2014-10-02	3.89	4	0.774197
2014-10-03	3.9	5	0.25674
2014-10-06	3.82	1	-2.07261
2014-10-07	3.86	2	1.04168
2014-10-08	3.81	3	-1.3038
2014-10-09	3.63	4	-4.83965
2014-10-10	3.64	5	0.275103
2014-10-13	3.64	1	0
2014-10-14	3.63	2	-0.275103
2014-10-15	3.65	3	0.549452
2014-10-16	3.64	4	-0.274349
2014-10-17	3.67	5	0.820798
2014-10-20	3.68	1	0.272109
2014-10-21	3.71	2	0.811912
2014-10-22	3.71	3	0
2014-10-23	3.79	4	2.13341
2014-10-24	3.91	5	3.11714
2014-10-27	3.82	1	-2.3287
2014-10-28	3.91	2	2.3287
2014-10-29	3.86	3	-1.28702
2014-10-30	3.81	4	-1.3038
2014-10-31	3.69	5	-3.20027
2014-11-03	3.66	1	-0.816331
2014-11-04	3.77	2	2.96119
2014-11-05	3.68	3	-2.41622
2014-11-06	3.61	4	-1.9205
2014-11-07	3.56	5	-1.39472
2014-11-10	3.54	1	-0.563382
2014-11-11	3.54	2	0
2014-11-12	3.54	3	0
2014-11-13	3.43	4	-3.15665
2014-11-14	3.44	5	0.291121
2014-11-17	3.5	1	1.72915
2014-11-18	3.5	2	0
2014-11-19	3.44	3	-1.72915
2014-11-20	3.37	4	-2.05587
2014-11-21	3.36	5	-0.297177
2014-11-24	3.37	1	0.297177
2014-11-25	3.16	2	-6.43407
2014-11-26	3.09	3	-2.24009
2014-11-27	3.09	4	0
2014-11-28	3.06	5	-0.975617
2014-12-01	3.05	1	-0.327333
2014-12-02	3.06	2	0.327333
2014-12-03	3.06	3	0
2014-12-04	3.13	4	2.26181
2014-12-05	3.17	5	1.26986
2014-12-08	3.28	1	3.41118
2014-12-09	3.3	2	0.607905
2014-12-10	3.29	3	-0.30349
2014-12-11	3.3	4	0.30349
2014-12-12	3.32	5	0.604231
2014-12-15	3.33	1	0.300752
2014-12-16	3.34	2	0.29985
2014-12-17	3.34	3	0
2014-12-18	3.35	4	0.298954
2014-12-19	3.36	5	0.298063
2014-12-22	3.31	1	-1.49928
2014-12-23	3.3	2	-0.302572
2014-12-24	3.29	3	-0.30349
2014-12-25	3.29	4	0
2014-12-26	3.29	5	0
2014-12-29	3.29	1	0
2014-12-30	3.23	2	-1.84054
2014-12-31	3.25	3	0.617286
2015-01-01	3.25	4	0
2015-01-02	3.26	5	0.30722
2015-01-05	3.22	1	-1.23458
2015-01-06	3.26	2	1.23458
2015-01-07	3.25	3	-0.30722
2015-01-08	3.22	4	-0.927364
2015-01-09	3.22	5	0
2015-01-12	3.23	1	0.310078
2015-01-13	3.18	2	-1.56009
2015-01-14	3.13	3	-1.58482
2015-01-15	3.03	4	-3.24704
2015-01-16	3.02	5	-0.330579
2015-01-19	3.02	1	0
2015-01-20	3.09	2	2.29143
2015-01-21	3.1	3	0.323102
2015-01-22	3.11	4	0.322061
2015-01-23	3.11	5	0
2015-01-26	3.11	1	0
2015-01-27	3.11	2	0
2015-01-28	3.09	3	-0.645164
2015-01-29	3.08	4	-0.324149
2015-01-30	3.03	5	-1.6367
2015-02-02	2.96	1	-2.33734
2015-02-03	2.89	2	-2.39328
2015-02-04	3	3	3.73558
2015-02-05	3.01	4	0.332779
2015-02-06	3.08	5	2.29895
2015-02-09	3.04	1	-1.30721
2015-02-10	3	2	-1.32452
2015-02-11	2.95	3	-1.68071
2015-02-12	2.94	4	-0.339559
2015-02-13	2.93	5	-0.340716
2015-02-16	2.93	1	0
2015-02-17	2.99	2	2.0271
2015-02-18	2.98	3	-0.335009
2015-02-19	2.95	4	-1.01181
2015-02-20	2.97	5	0.675678
2015-02-23	2.94	1	-1.01524
2015-02-24	2.92	2	-0.682597
2015-02-25	2.95	3	1.02216
2015-02-26	2.96	4	0.33841
2015-02-27	3.02	5	2.00676
2015-03-02	3.11	1	2.93659
2015-03-03	3.08	2	-0.969313
2015-03-04	3.14	3	1.92932
2015-03-05	3.15	4	0.317965
2015-03-06	3.17	5	0.632914
2015-03-09	3.13	1	-1.26986
2015-03-10	3.13	2	0
2015-03-11	3.13	3	0
2015-03-12	3.12	4	-0.32
2015-03-13	3.11	5	-0.321028
2015-03-16	3.08	1	-0.969313
2015-03-17	3.08	2	0
2015-03-18	3.01	3	-2.29895
2015-03-19	3.03	4	0.662254
2015-03-20	3.03	5	0
2015-03-23	3.09	1	1.96085
2015-03-24	3.12	2	0.966191
2015-03-25	3.12	3	0
2015-03-26	3.12	4	0
2015-03-27	3.08	5	-1.29034
2015-03-30	3.02	1	-1.96728
2015-03-31	3	2	-0.664454
2015-04-01	2.95	3	-1.68071
2015-04-02	2.92	4	-1.02216
2015-04-03	2.92	5	0
2015-04-06	2.99	1	2.36898
2015-04-07	2.99	2	0
2015-04-08	3.03	3	1.32892
2015-04-09	3	4	-0.995033
2015-04-10	2.99	5	-0.33389
2015-04-13	2.97	1	-0.671143
2015-04-14	2.94	2	-1.01524
2015-04-15	2.94	3	0
2015-04-16	2.91	4	-1.02565
2015-04-17	2.88	5	-1.03628
2015-04-20	2.93	1	1.72121
2015-04-21	2.93	2	0
2015-04-22	2.9	3	-1.02917
2015-04-23	2.89	4	-0.345423
2015-04-24	2.81	5	-2.8072
2015-04-27	2.72	1	-3.25526
2015-04-28	2.68	2	-1.48151
2015-04-29	2.66	3	-0.749067
2015-04-30	2.63	4	-1.13423
2015-05-01	2.66	5	1.13423
2015-05-04	2.58	1	-3.05367
2015-05-05	2.54	2	-1.56253
2015-05-06	2.52	3	-0.790518
2015-05-07	2.63	4	4.27249
2015-05-08	2.55	5	-3.08905
2015-05-11	2.62	1	2.7081
2015-05-12	2.66	2	1.51518
2015-05-13	2.73	3	2.59755
2015-05-14	2.66	4	-2.59755
2015-05-15	2.78	5	4.41248
2015-05-18	2.79	1	0.359067
2015-05-19	2.84	2	1.77625
2015-05-20	2.78	3	-2.13531
2015-05-21	2.71	4	-2.55023
2015-05-22	2.74	5	1.10093
2015-05-25	2.74	1	0
2015-05-26	2.75	2	0.364299
2015-05-27	2.69	3	-2.20597
2015-05-28	2.67	4	-0.746272
2015-05-29	2.7	5	1.11733
2015-06-01	2.64	1	-2.24729
2015-06-02	2.75	2	4.0822
2015-06-03	2.83	3	2.86758
2015-06-04	2.82	4	-0.353983
2015-06-05	2.84	5	0.706717
2015-06-08	2.89	1	1.74524
2015-06-09	2.95	2	2.05487
2015-06-10	2.87	3	-2.74931
2015-06-11	2.86	4	-0.34904
2015-06-12	2.9	5	1.38891
2015-06-15	2.86	1	-1.38891
2015-06-16	2.82	2	-1.40847
2015-06-17	2.83	3	0.353983
2015-06-18	2.85	4	0.704228
2015-06-19	2.81	5	-1.41345
2015-06-22	2.74	1	-2.52266
2015-06-23	2.8	2	2.16615
2015-06-24	2.84	3	1.41846
2015-06-25	2.87	4	1.0508
2015-06-26	2.91	5	1.38411
2015-06-29	2.9	1	-0.344234
2015-06-30	2.76	2	-4.94801
2015-07-01	2.83	3	2.5046
2015-07-02	2.75	4	-2.86758
2015-07-03	2.75	5	0
2015-07-06	2.74	1	-0.364299
2015-07-07	2.92	2	6.36257
2015-07-08	2.91	3	-0.343054
2015-07-09	2.85	4	-2.08341
2015-07-10	2.85	5	0
2015-07-13	2.88	1	1.04713
2015-07-14	2.86	2	-0.696867
2015-07-15	2.86	3	0
2015-07-16	2.86	4	0
2015-07-17	2.86	5	0
2015-07-20	2.8	1	-2.12022
2015-07-21	2.71	2	-3.26708
2015-07-22	2.7	3	-0.369686
2015-07-23	2.66	4	-1.49257
2015-07-24	2.67	5	0.375235
2015-07-27	2.59	1	-3.04206
2015-07-28	2.56	2	-1.16506
2015-07-29	2.61	3	1.9343
2015-07-30	2.59	4	-0.769235
2015-07-31	2.65	5	2.29018
2015-08-03	2.71	1	2.2389
2015-08-04	2.64	2	-2.61697
2015-08-05	2.66	3	0.754721
2015-08-06	2.65	4	-0.376648
2015-08-07	2.66	5	0.376648
2015-08-10	2.66	1	0
2015-08-11	2.64	2	-0.754721
2015-08-12	2.57	3	-2.6873
2015-08-13	2.57	4	0
2015-08-14	2.58	5	0.38835
2015-08-17	2.58	1	0
2015-08-18	2.53	2	-1.95701
2015-08-19	2.55	3	0.787406
2015-08-20	2.53	4	-0.787406
2015-08-21	2.52	5	-0.39604
2015-08-24	2.44	1	-3.22609
2015-08-25	2.46	2	0.816331
2015-08-26	2.43	3	-1.22701
2015-08-27	2.41	4	-0.826451
2015-08-28	2.47	5	2.45914
2015-08-31	2.65	1	7.03415
2015-09-01	2.66	2	0.376648
2015-09-02	2.59	3	-2.66682
2015-09-03	2.65	4	2.29018
2015-09-04	2.63	5	-0.757579
2015-09-07	2.63	1	0
2015-09-08	2.65	2	0.757579
2015-09-09	2.73	3	2.9742
2015-09-10	2.83	4	3.59751
2015-09-11	2.87	5	1.40353
2015-09-14	2.85	1	-0.699304
2015-09-15	2.88	2	1.04713
2015-09-16	2.91	3	1.03628
2015-09-17	2.89	4	-0.689658
2015-09-18	2.87	5	-0.694447
2015-09-21	2.86	1	-0.34904
2015-09-22	2.87	2	0.34904
2015-09-23	2.82	3	-1.75751
2015-09-24	2.85	4	1.05821
2015-09-25	2.81	5	-1.41345
2015-09-28	2.86	1	1.76371
2015-09-29	2.84	2	-0.701757
2015-09-30	2.82	3	-0.706717
2015-10-01	2.82	4	0
2015-10-02	2.76	5	-2.15062
2015-10-05	2.67	1	-3.31522
2015-10-06	2.71	2	1.48702
2015-10-07	2.74	3	1.10093
2015-10-08	2.74	4	0
2015-10-09	2.74	5	0
2015-10-12	2.74	1	0
2015-10-13	2.82	2	2.8779
2015-10-14	2.87	3	1.75751
2015-10-15	2.87	4	0
2015-10-16	2.9	5	1.03987
2015-10-19	2.86	1	-1.38891
2015-10-20	2.82	2	-1.40847
2015-10-21	2.8	3	-0.711747
2015-10-22	2.83	4	1.06573
2015-10-23	2.8	5	-1.06573
2015-10-26	2.83	1	1.06573
2015-10-27	2.84	2	0.352734
2015-10-28	2.82	3	-0.706717
2015-10-29	2.82	4	0
2015-10-30	2.82	5	0
2015-11-02	2.82	1	0
2015-11-03	2.78	2	-1.4286
2015-11-04	2.8	3	0.716849
2015-11-05	2.81	4	0.356507
2015-11-06	2.8	5	-0.356507
2015-11-09	2.79	1	-0.357782
2015-11-10	2.79	2	0
2015-11-11	2.79	3	0
2015-11-12	2.79	4	0
2015-11-13	2.85	5	2.12774
2015-11-16	2.87	1	0.699304
2015-11-17	2.9	2	1.03987
2015-11-18	2.93	3	1.02917
2015-11-19	2.98	4	1.69209
2015-11-20	3.03	5	1.66393
2015-11-23	3.06	1	0.98523
2015-11-24	2.99	2	-2.31415
2015-11-25	3.05	3	1.98682
2015-11-26	3.05	4	0
2015-11-27	3.03	5	-0.657897
2015-11-30	2.88	1	-5.07723
2015-12-01	2.88	2	0
2015-12-02	2.92	3	1.37933
2015-12-03	2.9	4	-0.687288
2015-12-04	2.95	5	1.70944
2015-12-07	2.96	1	0.33841
2015-12-08	2.9	2	-2.04785
2015-12-09	2.97	3	2.38512
2015-12-10	2.95	4	-0.675678
2015-12-11	2.93	5	-0.680275
2015-12-14	2.88	1	-1.72121
2015-12-15	2.78	2	-3.53394
2015-12-16	2.63	3	-5.54671
2015-12-17	2.53	4	-3.87645
2015-12-18	2.58	5	1.95701
2015-12-21	2.52	1	-2.35305
2015-12-22	2.55	2	1.18345
2015-12-23	2.6	3	1.94181
2015-12-24	2.62	4	0.766287
2015-12-25	2.62	5	0
2015-12-28	2.6	1	-0.766287
2015-12-29	2.64	2	1.52675
2015-12-30	2.66	3	0.754721
2015-12-31	2.68	4	0.749067
2016-01-01	2.68	5	0
2016-01-04	2.68	1	0
2016-01-05	2.66	2	-0.749067
2016-01-06	2.65	3	-0.376648
2016-01-07	2.67	4	0.751883
2016-01-08	2.64	5	-1.12996
2016-01-11	2.66	1	0.754721
2016-01-12	2.54	2	-4.6162
2016-01-13	2.61	3	2.71861
2016-01-14	2.6	4	-0.383878
2016-01-15	2.55	5	-1.94181
2016-01-18	2.55	1	0
2016-01-19	2.54	2	-0.392928
2016-01-20	2.63	3	3.48198
2016-01-21	2.6	4	-1.14724
2016-01-22	2.59	5	-0.385357
2016-01-25	2.61	1	0.769235
2016-01-26	2.6	2	-0.383878
2016-01-27	2.57	3	-1.16055
2016-01-28	2.56	4	-0.389864
2016-01-29	2.54	5	-0.784318
2016-02-01	2.56	1	0.784318
2016-02-02	2.52	2	-1.57484
2016-02-03	2.55	3	1.18345
2016-02-04	2.52	4	-1.18345
2016-02-05	2.51	5	-0.397615
2016-02-08	2.52	1	0.397615
2016-02-09	2.54	2	0.790518
2016-02-10	2.51	3	-1.18813
2016-02-11	2.44	4	-2.82847
2016-02-12	2.47	5	1.22201
2016-02-15	2.47	1	0
2016-02-16	2.51	2	1.60646
2016-02-17	2.54	3	1.18813
2016-02-18	2.56	4	0.784318
2016-02-19	2.54	5	-0.784318
2016-02-22	2.47	1	-2.79459
2016-02-23	2.43	2	-1.63269
2016-02-24	2.38	3	-2.07908
2016-02-25	2.33	4	-2.12322
2016-02-26	2.26	5	-3.05035
2016-02-29	2.26	1	0
2016-03-01	2.24	2	-0.888895
2016-03-02	2.2	3	-1.80185
2016-03-03	2.25	4	2.24729
2016-03-04	2.37	5	5.19597
2016-03-07	2.37	1	0
2016-03-08	2.43	2	2.50013
2016-03-09	2.44	3	0.410678
2016-03-10	2.42	4	-0.82305
2016-03-11	2.43	5	0.412372
2016-03-14	2.47	1	1.63269
2016-03-15	2.51	2	1.60646
2016-03-16	2.51	3	0
2016-03-17	2.51	4	0
2016-03-18	2.46	5	-2.01214
2016-03-21	2.43	1	-1.22701
2016-03-22	2.46	2	1.22701
2016-03-23	2.45	3	-0.407333
2016-03-24	2.43	4	-0.819677
2016-03-25	2.43	5	0
2016-03-28	2.42	1	-0.412372
2016-03-29	2.45	2	1.23205
2016-03-30	2.45	3	0
2016-03-31	2.4	4	-2.06193
2016-04-01	2.41	5	0.415801
2016-04-04	2.4	1	-0.415801
2016-04-05	2.42	2	0.82988
2016-04-06	2.39	3	-1.24742
2016-04-07	2.39	4	0
2016-04-08	2.41	5	0.833338
2016-04-11	2.42	1	0.414079
2016-04-12	2.4	2	-0.82988
2016-04-13	2.43	3	1.24225
2016-04-14	2.47	4	1.63269
2016-04-15	2.48	5	0.404041
2016-04-18	2.45	1	-1.21705
2016-04-19	2.46	2	0.407333
2016-04-20	2.51	3	2.01214
2016-04-21	2.62	4	4.28916
2016-04-22	2.56	5	-2.31671
2016-04-25	2.53	1	-1.1788
2016-04-26	2.62	2	3.4955
2016-04-27	2.61	3	-0.38241
2016-04-28	2.61	4	0
2016-04-29	2.59	5	-0.769235
2016-05-02	2.59	1	0
2016-05-03	2.57	2	-0.775198
2016-05-04	2.52	3	-1.9647
2016-05-05	2.5	4	-0.796817
2016-05-06	2.48	5	-0.803217
2016-05-09	2.48	1	0
2016-05-10	2.45	2	-1.21705
2016-05-11	2.47	3	0.813013
2016-05-12	2.43	4	-1.63269
2016-05-13	2.47	5	1.63269
2016-05-16	2.5	1	1.20726
2016-05-17	2.52	2	0.796817
2016-05-18	2.52	3	0
2016-05-19	2.49	4	-1.19762
2016-05-20	2.43	5	-2.43915
2016-05-23	2.45	1	0.819677
2016-05-24	2.45	2	0
2016-05-25	2.44	3	-0.408999
2016-05-26	2.45	4	0.408999
2016-05-27	2.51	5	2.41947
2016-05-30	2.51	1	0
2016-05-31	2.53	2	0.793655
2016-06-01	2.49	3	-1.59366
2016-06-02	2.5	4	0.400802
2016-06-03	2.51	5	0.399202
2016-06-06	2.48	1	-1.20242
2016-06-07	2.54	2	2.39055
2016-06-08	2.57	3	1.17418
2016-06-09	2.66	4	3.44202
2016-06-10	2.6	5	-2.28147
2016-06-13	2.57	1	-1.16055
2016-06-14	2.6	2	1.16055
2016-06-15	2.62	3	0.766287
2016-06-16	2.6	4	-0.766287
2016-06-17	2.6	5	0
2016-06-20	2.63	1	1.14724
2016-06-21	2.63	2	0
2016-06-22	2.62	3	-0.380953
2016-06-23	2.62	4	0
2016-06-24	2.62	5	0
2016-06-27	2.64	1	0.76046
2016-06-28	2.59	2	-1.9121
2016-06-29	2.64	3	1.9121
2016-06-30	2.67	4	1.12996
2016-07-01	2.68	5	0.373832
2016-07-04	2.68	1	0
2016-07-05	2.56	2	-4.58095
2016-07-06	2.55	3	-0.39139
2016-07-07	2.58	4	1.1696
2016-07-08	2.59	5	0.386848
2016-07-11	2.6	1	0.385357
2016-07-12	2.69	2	3.40297
2016-07-13	2.72	3	1.10907
2016-07-14	2.75	4	1.0969
2016-07-15	2.72	5	-1.0969
2016-07-18	2.69	1	-1.10907
2016-07-19	2.72	2	1.10907
2016-07-20	2.69	3	-1.10907
2016-07-21	2.71	4	0.740744
2016-07-22	2.73	5	0.735297
2016-07-25	2.73	1	0
2016-07-26	2.69	2	-1.47604
2016-07-27	2.65	3	-1.49816
2016-07-28	2.62	4	-1.13853
2016-07-29	2.63	5	0.380953
2016-08-01	2.66	1	1.13423
2016-08-02	2.65	2	-0.376648
2016-08-03	2.61	3	-1.52094
2016-08-04	2.61	4	0
2016-08-05	2.5	5	-4.30595
2016-08-08	2.44	1	-2.42927
2016-08-09	2.42	2	-0.82305
2016-08-10	2.4	3	-0.82988
2016-08-11	2.37	4	-1.25788
2016-08-12	2.34	5	-1.2739
2016-08-15	2.32	1	-0.858374
2016-08-16	2.37	2	2.13228
2016-08-17	2.38	3	0.421053
2016-08-18	2.36	4	-0.843887
2016-08-19	2.35	5	-0.424629
2016-08-22	2.4	1	2.10534
2016-08-23	2.37	2	-1.25788
2016-08-24	2.37	3	0
2016-08-25	2.29	4	-3.43381
2016-08-26	2.39	5	4.27415
2016-08-29	2.35	1	-1.6878
2016-08-30	2.29	2	-2.58635
2016-08-31	2.28	3	-0.437637
2016-09-01	2.26	4	-0.881063
2016-09-02	2.31	5	2.18827
2016-09-05	2.31	1	0
2016-09-06	2.28	2	-1.30721
2016-09-07	2.24	3	-1.76996
2016-09-08	2.25	4	0.445435
2016-09-09	2.28	5	1.32452
2016-09-12	2.27	1	-0.439561
2016-09-13	2.25	2	-0.884962
2016-09-14	2.24	3	-0.445435
2016-09-15	2.25	4	0.445435
2016-09-16	2.23	5	-0.892863
2016-09-19	2.26	1	1.33632
2016-09-20	2.23	2	-1.33632
2016-09-21	2.25	3	0.892863
2016-09-22	2.26	4	0.44346
2016-09-23	2.27	5	0.441502
2016-09-26	2.27	1	0
2016-09-27	2.23	2	-1.77782
2016-09-28	2.3	3	3.09075
2016-09-29	2.34	4	1.72418
2016-09-30	2.41	5	2.94758
2016-10-03	2.48	1	2.86318
2016-10-04	2.58	2	3.95308
2016-10-05	2.56	3	-0.778214
2016-10-06	2.59	4	1.16506
2016-10-07	2.63	5	1.5326
2016-10-10	2.63	1	0
2016-10-11	2.66	2	1.13423
2016-10-12	2.74	3	2.96318
2016-10-13	2.73	4	-0.365631
2016-10-14	2.71	5	-0.735297
2016-10-17	2.74	1	1.10093
2016-10-18	2.75	2	0.364299
2016-10-19	2.79	3	1.44407
2016-10-20	2.84	4	1.77625
2016-10-21	2.86	5	0.701757
2016-10-24	2.93	1	2.41808
2016-10-25	2.88	2	-1.72121
2016-10-26	2.87	3	-0.347826
2016-10-27	2.9	4	1.03987
2016-10-28	3.07	5	5.69668
2016-10-31	2.99	1	-2.64042
2016-11-01	2.96	2	-1.00841
2016-11-02	2.95	3	-0.33841
2016-11-03	3	4	1.68071
2016-11-04	2.97	5	-1.00503
2016-11-07	3.03	1	2.00007
2016-11-08	3.03	2	0
2016-11-09	3.01	3	-0.662254
2016-11-10	2.98	4	-1.00168
2016-11-11	2.98	5	0
2016-11-14	2.96	1	-0.673403
2016-11-15	3.03	2	2.33734
2016-11-16	3.08	3	1.6367
2016-11-17	3.09	4	0.324149
2016-11-18	3.1	5	0.323102
2016-11-21	3.08	1	-0.647251
2016-11-22	3	2	-2.63173
2016-11-23	2.97	3	-1.00503
2016-11-24	2.97	4	0
2016-11-25	2.92	5	-1.69783
2016-11-28	2.84	1	-2.77796
2016-11-29	2.84	2	0
2016-11-30	2.74	3	-3.58461
2016-12-01	2.74	4	0
2016-12-02	2.75	5	0.364299
2016-12-05	2.83	1	2.86758
2016-12-06	2.81	2	-0.709223
2016-12-07	2.87	3	2.11275
2016-12-08	2.91	4	1.38411
2016-12-09	2.93	5	0.684934
2016-12-12	3	1	2.36099
2016-12-13	3.05	2	1.65293
2016-12-14	3.08	3	0.978801
2016-12-15	3.05	4	-0.978801
2016-12-16	3	5	-1.65293
2016-12-19	2.99	1	-0.33389
2016-12-20	3.01	2	0.666669
2016-12-21	2.99	3	-0.666669
2016-12-22	2.98	4	-0.335009
2016-12-23	2.93	5	-1.69209
2016-12-26	2.93	1	0
2016-12-27	2.94	2	0.340716
2016-12-28	3.04	3	3.34479
2016-12-29	3.03	4	-0.32949
2016-12-30	3.02	5	-0.330579
2017-01-02	3.02	1	0
2017-01-03	3.04	2	0.660068
2017-01-04	3.11	3	2.27652
2017-01-05	3.13	4	0.641028
2017-01-06	3.12	5	-0.32
2017-01-09	3.03	1	-2.92704
2017-01-10	3.01	2	-0.662254
2017-01-11	3.02	3	0.331675
2017-01-12	3.07	4	1.64207
2017-01-13	3.11	5	1.29452
2017-01-16	3.11	1	0
2017-01-17	3.18	2	2.22585
2017-01-18	3.24	3	1.86921
2017-01-19	3.32	4	2.43915
2017-01-20	3.28	5	-1.21214
2017-01-23	3.28	1	0
2017-01-24	3.25	2	-0.918843
2017-01-25	3.17	3	-2.49234
2017-01-26	3.2	4	0.941922
2017-01-27	3.2	5	0
2017-01-30	3.23	1	0.933133
2017-01-31	3.14	2	-2.82593
2017-02-01	3.14	3	0
2017-02-02	3.21	4	2.20481
2017-02-03	3.25	5	1.23841
2017-02-06	3.29	1	1.22326
2017-02-07	3.31	2	0.606062
2017-02-08	3.28	3	-0.910477
2017-02-09	3.24	4	-1.22701
2017-02-10	3.25	5	0.308167
2017-02-13	3.15	1	-3.12525
2017-02-14	3.15	2	0
2017-02-15	3.09	3	-1.92314
2017-02-16	3.06	4	-0.975617
2017-02-17	3	5	-1.98026
2017-02-20	3	1	0
2017-02-21	3.01	2	0.332779
2017-02-22	3.03	3	0.662254
2017-02-23	3.08	4	1.6367
2017-02-24	3.13	5	1.61034
2017-02-27	3.17	1	1.26986
2017-02-28	3.2	2	0.941922
2017-03-01	3.28	3	2.46926
2017-03-02	3.31	4	0.910477
2017-03-03	3.27	5	-1.21582
2017-03-06	3.31	1	1.21582
2017-03-07	3.29	2	-0.606062
2017-03-08	3.26	3	-0.916037
2017-03-09	3.19	4	-2.17063
2017-03-10	3.11	5	-2.53982
2017-03-13	3.11	1	0
2017-03-14	3.06	2	-1.62078
2017-03-15	3.14	3	2.58079
2017-03-16	3.12	4	-0.63898
2017-03-17	3.04	5	-2.59755
2017-03-20	3.04	1	0
2017-03-21	3.01	2	-0.991744
2017-03-22	2.99	3	-0.666669
2017-03-23	2.92	4	-2.36898
2017-03-24	2.83	5	-3.13069
2017-03-27	2.78	1	-1.78258
2017-03-28	2.75	2	-1.085
2017-03-29	2.75	3	0
2017-03-30	2.76	4	0.362977
2017-03-31	2.77	5	0.361664
2017-04-03	2.74	1	-1.08894
2017-04-04	2.81	2	2.52266
2017-04-05	2.83	3	0.709223
2017-04-06	2.88	4	1.75136
2017-04-07	2.89	5	0.346621
2017-04-10	2.87	1	-0.694447
2017-04-11	2.87	2	0
2017-04-12	2.9	3	1.03987
2017-04-13	2.95	4	1.70944
2017-04-14	2.96	5	0.33841
2017-04-17	2.96	1	0
2017-04-18	2.89	2	-2.39328
2017-04-19	2.89	3	0
2017-04-20	2.88	4	-0.346621
2017-04-21	2.92	5	1.37933
2017-04-24	2.88	1	-1.37933
2017-04-25	2.9	2	0.692044
2017-04-26	2.93	3	1.02917
2017-04-27	2.91	4	-0.684934
2017-04-28	2.93	5	0.684934
2017-05-01	3.08	1	4.99272
2017-05-02	3.13	2	1.61034
2017-05-03	3.07	3	-1.93554
2017-05-04	2.98	4	-2.97543
2017-05-05	2.99	5	0.335009
2017-05-08	2.99	1	0
2017-05-09	2.99	2	0
2017-05-10	2.91	3	-2.71203
2017-05-11	2.84	4	-2.4349
2017-05-12	2.81	5	-1.06196
2017-05-15	2.71	1	-3.62358
2017-05-16	2.6	2	-4.14372
2017-05-17	2.6	3	0
2017-05-18	2.71	4	4.14372
2017-05-19	2.76	5	1.8282
2017-05-22	2.87	1	3.90814
2017-05-23	2.97	2	3.42499
2017-05-24	2.96	3	-0.337268
2017-05-25	2.96	4	0
2017-05-26	3.02	5	2.00676
2017-05-29	3.02	1	0
2017-05-30	3.04	2	0.660068
2017-05-31	3.02	3	-0.660068
2017-06-01	3.08	4	1.96728
2017-06-02	3.15	5	2.24729
2017-06-05	3.06	1	-2.89875
2017-06-06	3.02	2	-1.31581
2017-06-07	3.16	3	4.53152
2017-06-08	3.21	4	1.56989
2017-06-09	3.05	5	-5.11293
2017-06-12	3.12	1	2.26914
2017-06-13	3.1	2	-0.643089
2017-06-14	3.13	3	0.963089
2017-06-15	3.16	4	0.953902
2017-06-16	3.21	5	1.56989
2017-06-19	3.29	1	2.46166
2017-06-20	3.28	2	-0.304414
2017-06-21	3.21	3	-2.15725
2017-06-22	3.19	4	-0.625002
2017-06-23	3.17	5	-0.628933
2017-06-26	3.15	1	-0.632914
2017-06-27	3.1	2	-1.60003
2017-06-28	3.07	3	-0.972455
2017-06-29	3.27	4	6.31124
2017-06-30	3.26	5	-0.306279
2017-07-03	3.5	1	7.10358
2017-07-04	3.5	2	0
2017-07-05	3.45	3	-1.43887
2017-07-06	3.4	4	-1.45988
2017-07-07	3.33	5	-2.08031
2017-07-10	3.43	1	2.9588
2017-07-11	3.66	2	6.49029
2017-07-12	3.62	3	-1.09891
2017-07-13	3.47	4	-4.23194
2017-07-14	3.36	5	-3.22136
2017-07-17	3.47	1	3.22136
2017-07-18	3.46	2	-0.2886
2017-07-19	3.52	3	1.71924
2017-07-20	3.53	4	0.283688
2017-07-21	3.56	5	0.846267
2017-07-24	3.56	1	0
2017-07-25	3.49	2	-1.98588
2017-07-26	3.42	3	-2.02612
2017-07-27	3.49	4	2.02612
2017-07-28	3.52	5	0.855925
2017-07-31	3.5	1	-0.569802
2017-08-01	3.44	2	-1.72915
2017-08-02	3.4	3	-1.1696
2017-08-03	3.5	4	2.89875
2017-08-04	3.45	5	-1.43887
2017-08-07	3.44	1	-0.290276
2017-08-08	3.34	2	-2.95007
2017-08-09	3.34	3	0
2017-08-10	3.31	4	-0.902262
2017-08-11	3.26	5	-1.5221
2017-08-14	3.24	1	-0.615387
2017-08-15	3.21	2	-0.930239
2017-08-16	3.17	3	-1.25393
2017-08-17	3.17	4	0
2017-08-18	3.18	5	0.314961
2017-08-21	3.19	1	0.313972
2017-08-22	3.1	2	-2.86188
2017-08-23	3.06	3	-1.29872
2017-08-24	3.06	4	0
2017-08-25	3.12	5	1.94181
2017-08-28	3.13	1	0.32
2017-08-29	3.12	2	-0.32
2017-08-30	3.07	3	-1.61554
2017-08-31	3.03	4	-1.31149
2017-09-01	2.97	5	-2.00007
2017-09-04	2.97	1	0
2017-09-05	2.96	2	-0.337268
2017-09-06	2.91	3	-1.70362
2017-09-07	2.94	4	1.02565
2017-09-08	2.94	5	0
2017-09-11	2.92	1	-0.682597
2017-09-12	2.94	2	0.682597
2017-09-13	2.94	3	0
2017-09-14	2.98	4	1.35137
2017-09-15	2.98	5	0
2017-09-18	2.96	1	-0.673403
2017-09-19	3	2	1.3423
2017-09-20	3	3	0
2017-09-21	3.06	4	1.98026
2017-09-22	3.1	5	1.29872
2017-09-25	3.08	1	-0.647251
2017-09-26	3.11	2	0.969313
2017-09-27	3.1	3	-0.322061
2017-09-28	3.08	4	-0.647251
2017-09-29	3.1	5	0.647251
2017-10-02	3.11	1	0.322061
2017-10-03	3.13	2	0.641028
2017-10-04	3.11	3	-0.641028
2017-10-05	3.06	4	-1.62078
2017-10-06	3.07	5	0.326265
2017-10-09	3.07	1	0
2017-10-10	3.11	2	1.29452
2017-10-11	3.1	3	-0.322061
2017-10-12	3.13	4	0.963089
2017-10-13	3.22	5	2.83484
2017-10-16	3.27	1	1.54086
2017-10-17	3.2	2	-2.16392
2017-10-18	3.25	3	1.55042
2017-10-19	3.28	4	0.918843
2017-10-20	3.3	5	0.607905
2017-10-23	3.3	1	0
2017-10-24	3.34	2	1.20483
2017-10-25	3.37	3	0.894194
2017-10-26	3.36	4	-0.297177
2017-10-27	3.23	5	-3.94588
2017-10-30	3.25	1	0.617286
2017-10-31	3.23	2	-0.617286
2017-11-01	3.25	3	0.617286
2017-11-02	3.32	4	2.13098
2017-11-03	3.25	5	-2.13098
2017-11-06	3.23	1	-0.617286
2017-11-07	3.29	2	1.84054
2017-11-08	3.31	3	0.606062
2017-11-09	3.3	4	-0.302572
2017-11-10	3.3	5	0
2017-11-13	3.33	1	0.904984
2017-11-14	3.34	2	0.29985
2017-11-15	3.36	3	0.597017
2017-11-16	3.29	4	-2.10534
2017-11-17	3.22	5	-2.15062
2017-11-20	3.17	1	-1.56498
2017-11-21	3.15	2	-0.632914
2017-11-22	3.16	3	0.316957
2017-11-23	3.16	4	0
2017-11-24	3.11	5	-1.59493
2017-11-27	3.1	1	-0.322061
2017-11-28	3.11	2	0.322061
2017-11-29	3.05	3	-1.94811
2017-11-30	3.09	4	1.30295
2017-12-01	3.08	5	-0.324149
2017-12-04	3.08	1	0
2017-12-05	3.02	2	-1.96728
2017-12-06	3	3	-0.664454
2017-12-07	2.93	4	-2.36099
2017-12-08	2.9	5	-1.02917
2017-12-11	2.87	1	-1.03987
2017-12-12	2.89	2	0.694447
2017-12-13	2.89	3	0
2017-12-14	2.99	4	3.40169
2017-12-15	3.02	5	0.998344
2017-12-18	3.04	1	0.660068
2017-12-19	3.02	2	-0.660068
2017-12-20	2.97	3	-1.66949
2017-12-21	2.95	4	-0.675678
2017-12-22	2.94	5	-0.339559
2017-12-25	2.94	1	0
2017-12-26	2.93	2	-0.340716
2017-12-27	2.93	3	0
2017-12-28	2.93	4	0
2017-12-29	2.93	5	0
2018-01-01	2.93	1	0
2018-01-02	2.91	2	-0.684934
2018-01-03	2.93	3	0.684934
2018-01-04	2.95	4	0.680275
2018-01-05	2.96	5	0.33841
2018-01-08	2.99	1	1.00841
2018-01-09	3	2	0.33389
2018-01-10	2.99	3	-0.33389
2018-01-11	3.01	4	0.666669
2018-01-12	3.01	5	0
2018-01-15	3.01	1	0
2018-01-16	3	2	-0.332779
2018-01-17	3	3	0
2018-01-18	3.04	4	1.32452
2018-01-19	3.15	5	3.55449
2018-01-22	3.13	1	-0.636945
2018-01-23	3.13	2	0
2018-01-24	3.25	3	3.7622
2018-01-25	3.26	4	0.30722
2018-01-26	3.11	5	-4.71045
2018-01-29	3.16	1	1.59493
2018-01-30	3.2	2	1.25788
2018-01-31	3.2	3	0
2018-02-01	3.16	4	-1.25788
2018-02-02	3.17	5	0.315956
2018-02-05	3.18	1	0.314961
2018-02-06	3.17	2	-0.314961
2018-02-07	3.19	3	0.628933
2018-02-08	3.23	4	1.24612
2018-02-09	3.2	5	-0.933133
2018-02-12	3.17	1	-0.941922
2018-02-13	3.25	2	2.49234
2018-02-14	3.24	3	-0.308167
2018-02-15	3.16	4	-2.50013
2018-02-16	3.14	5	-0.634923
2018-02-19	3.14	1	0
2018-02-20	3.13	2	-0.31898
2018-02-21	3.11	3	-0.641028
2018-02-22	3.03	4	-2.60601
2018-02-23	3.03	5	0
2018-02-26	3.05	1	0.657897
2018-02-27	3.08	2	0.978801
2018-02-28	3.15	3	2.24729
2018-03-01	3.15	4	0
2018-03-02	3.19	5	1.26185
2018-03-05	3.14	1	-1.57981
2018-03-06	3.14	2	0
2018-03-07	3.13	3	-0.31898
2018-03-08	3.09	4	-1.28619
2018-03-09	3.1	5	0.323102
2018-03-12	3.08	1	-0.647251
2018-03-13	3.08	2	0
2018-03-14	3.08	3	0
2018-03-15	3.01	4	-2.29895
2018-03-16	2.96	5	-1.67508
2018-03-19	2.87	1	-3.08772
2018-03-20	2.8	2	-2.46926
2018-03-21	2.81	3	0.356507
2018-03-22	2.77	4	-1.43372
2018-03-23	2.79	5	0.719428
2018-03-26	2.76	1	-1.08109
2018-03-27	2.77	2	0.361664
2018-03-28	2.76	3	-0.361664
2018-03-29	2.72	4	-1.45988
2018-03-30	2.72	5	0
2018-04-02	2.85	1	4.66871
2018-04-03	2.92	2	2.42646
2018-04-04	2.93	3	0.341881
2018-04-05	2.9	4	-1.02917
2018-04-06	2.93	5	1.02917
2018-04-09	2.93	1	0
2018-04-10	2.97	2	1.35595
2018-04-11	2.97	3	0
2018-04-12	2.98	4	0.336135
2018-04-13	2.98	5	0
2018-04-16	2.94	1	-1.35137
2018-04-17	2.91	2	-1.02565
2018-04-18	2.94	3	1.02565
2018-04-19	3.01	4	2.35305
2018-04-20	3	5	-0.332779
2018-04-23	2.98	1	-0.668899
2018-04-24	2.92	2	-2.03397
2018-04-25	2.94	3	0.682597
2018-04-26	2.93	4	-0.340716
2018-04-27	2.91	5	-0.684934
2018-04-30	2.92	1	0.343054
2018-05-01	2.96	2	1.36057
2018-05-02	3.08	3	3.97403
2018-05-03	3.06	4	-0.651468
2018-05-04	3.07	5	0.326265
2018-05-07	3.05	1	-0.653597
2018-05-08	3.06	2	0.327333
2018-05-09	3.1	3	1.29872
2018-05-10	3.11	4	0.322061
2018-05-11	3.13	5	0.641028
2018-05-14	3.04	1	-2.91755
2018-05-15	3.09	2	1.63136
2018-05-16	3.1	3	0.323102
2018-05-17	3.11	4	0.322061
2018-05-18	3.11	5	0
2018-05-21	3.12	1	0.321028
2018-05-22	3.15	2	0.956945
2018-05-23	3.2	3	1.57484
2018-05-24	3.22	4	0.623055
2018-05-25	3.14	5	-2.51586
2018-05-28	3.14	1	0
2018-05-29	3.19	2	1.57981
2018-05-30	3.14	3	-1.57981
2018-05-31	3.09	4	-1.60517
2018-06-01	3.15	5	1.92314
2018-06-04	3.16	1	0.316957
2018-06-05	3.11	2	-1.59493
2018-06-06	3.14	3	0.960007
2018-06-07	3.11	4	-0.960007
2018-06-08	3.09	5	-0.645164
2018-06-11	3.11	1	0.645164
2018-06-12	3.13	2	0.641028
2018-06-13	3.12	3	-0.32
2018-06-14	3.03	4	-2.92704
2018-06-15	3	5	-0.995033
2018-06-18	3.04	1	1.32452
2018-06-19	3.03	2	-0.32949
2018-06-20	3.05	3	0.657897
2018-06-21	3.09	4	1.30295
2018-06-22	3.12	5	0.966191
2018-06-25	3.15	1	0.956945
2018-06-26	3.11	2	-1.27797
2018-06-27	3.11	3	0
2018-06-28	3.24	4	4.09506
2018-06-29	3.13	5	-3.45403
2018-07-02	3.15	1	0.636945
2018-07-03	3.1	2	-1.60003
2018-07-04	3.1	3	0
2018-07-05	3.1	4	0
2018-07-06	3.14	5	1.28207
2018-07-09	3.13	1	-0.31898
2018-07-10	3.11	2	-0.641028
2018-07-11	3.09	3	-0.645164
2018-07-12	3.1	4	0.323102
2018-07-13	3.01	5	-2.9462
2018-07-16	3.02	1	0.331675
2018-07-17	2.97	2	-1.66949
2018-07-18	2.97	3	0
2018-07-19	3	4	1.00503
2018-07-20	2.97	5	-1.00503
2018-07-23	2.99	1	0.671143
2018-07-24	2.98	2	-0.335009
2018-07-25	2.97	3	-0.336135
2018-07-26	2.99	4	0.671143
2018-07-27	2.99	5	0
2018-07-30	2.99	1	0
2018-07-31	3.03	2	1.32892
2018-08-01	3.06	3	0.98523
2018-08-02	3.08	4	0.651468
2018-08-03	3.11	5	0.969313
2018-08-06	3.17	1	1.91089
2018-08-07	3.3	2	4.01909
2018-08-08	3.19	3	-3.39016
2018-08-09	3.23	4	1.24612
2018-08-10	3.18	5	-1.56009
2018-08-13	3.14	1	-1.26584
2018-08-14	3.14	2	0
2018-08-15	3.16	3	0.634923
2018-08-16	3.07	4	-2.88945
2018-08-17	3.11	5	1.29452
2018-08-20	3.14	1	0.960007
2018-08-21	3.16	2	0.634923
2018-08-22	3.11	3	-1.59493
2018-08-23	3.12	4	0.321028
2018-08-24	3.17	5	1.58986
2018-08-27	3.14	1	-0.950879
2018-08-28	3.05	2	-2.90812
2018-08-29	3.02	3	-0.988476
2018-08-30	3.03	4	0.330579
[truncated: 931 more rows]

## Sheet: Orange juice
2010-12-31	93.164
2011-01-03	97.913	1	4.97179
2011-01-04	96.48	2	-1.47436
2011-01-05	98.377	3	1.94713
2011-01-06	101.082	4	2.7125
2011-01-07	101.405	5	0.319033
2011-01-10	101.686	1	0.276723
2011-01-11	101.83	2	0.141512
2011-01-12	101.069	3	-0.75013
2011-01-13	98.092	4	-2.98976
2011-01-14	98.367	5	0.279957
2011-01-17	98.367	1	0
2011-01-18	99.643	2	1.28884
2011-01-19	99.459	3	-0.18483
2011-01-20	99.96	4	0.502461
2011-01-21	98.452	5	-1.5201
2011-01-24	97.009	1	-1.47654
2011-01-25	96.44	2	-0.58827
2011-01-26	94.218	3	-2.33098
2011-01-27	93.99	4	-0.242285
2011-01-28	94.19	5	0.212563
2011-01-31	95.728	1	1.61968
2011-02-01	96.24	2	0.533424
2011-02-02	96.297	3	0.0592094
2011-02-03	97.408	4	1.14712
2011-02-04	97.551	5	0.146698
2011-02-07	97.123	1	-0.43971
2011-02-08	96.554	2	-0.587578
2011-02-09	94.873	3	-1.75633
2011-02-10	93.649	4	-1.29854
2011-02-11	93.62	5	-0.0309715
2011-02-14	94.93	1	1.38957
2011-02-15	94.731	2	-0.209848
2011-02-16	97.494	3	2.87495
2011-02-17	97.978	4	0.495213
2011-02-18	99.146	5	1.18505
2011-02-21	99.146	1	0
2011-02-22	100.94	2	1.79328
2011-02-23	99.601	3	-1.33541
2011-02-24	102.848	4	3.208
2011-02-25	102.677	5	-0.166403
2011-02-28	99.487	1	-3.15612
2011-03-01	99.7	2	0.213869
2011-03-02	100.142	3	0.44235
2011-03-03	99.054	4	-1.0924
2011-03-04	98.029	5	-1.04018
2011-03-07	98.68	1	0.661894
2011-03-08	99.846	2	1.17467
2011-03-09	98.149	3	-1.71423
2011-03-10	96.145	4	-2.06293
2011-03-11	94.919	5	-1.28336
2011-03-14	95.291	1	0.391147
2011-03-15	94.262	2	-1.08572
2011-03-16	93.21	3	-1.12231
2011-03-17	92.893	4	-0.340672
2011-03-18	92.204	5	-0.744478
2011-03-21	89.376	1	-3.11513
2011-03-22	89.291	2	-0.0951491
2011-03-23	89.775	3	0.540584
2011-03-24	90.886	4	1.22994
2011-03-25	91.285	5	0.438051
2011-03-28	90.914	1	-0.407248
2011-03-29	90.601	2	-0.344875
2011-03-30	90.829	3	0.251337
2011-03-31	91.398	4	0.624498
2011-04-01	91.512	5	0.124651
2011-04-04	92.082	1	0.620937
2011-04-05	92.253	2	0.185532
2011-04-06	91.341	3	-0.993505
2011-04-07	91.769	4	0.467479
2011-04-08	92.737	5	1.0493
2011-04-11	94.104	1	1.4633
2011-04-12	93.421	2	-0.728439
2011-04-13	93.079	3	-0.366756
2011-04-14	94.674	4	1.69908
2011-04-15	95.357	5	0.718833
2011-04-18	94.93	1	-0.448797
2011-04-19	95.813	2	0.92586
2011-04-20	97.095	3	1.32915
2011-04-21	95.642	4	-1.50778
2011-04-22	95.642	5	0
2011-04-25	95.101	1	-0.567257
2011-04-26	94.19	2	-0.962547
2011-04-27	94.418	3	0.241771
2011-04-28	94.674	4	0.270768
2011-04-29	96.098	5	1.49291
2011-05-02	96.463	1	0.379101
2011-05-03	98.111	2	1.694
2011-05-04	97.699	3	-0.420817
2011-05-05	96.897	4	-0.824276
2011-05-06	95.348	5	-1.61152
2011-05-09	94.361	1	-1.04055
2011-05-10	96.054	2	1.77827
2011-05-11	96.428	3	0.388608
2011-05-12	98.735	4	2.36429
2011-05-13	101.31	5	2.57456
2011-05-16	100.572	1	-0.731123
2011-05-17	100.085	2	-0.485406
2011-05-18	99.611	3	-0.474722
2011-05-19	101.527	4	1.90522
2011-05-20	99.915	5	-1.60049
2011-05-23	100.228	1	0.312777
2011-05-24	101.054	2	0.820744
2011-05-25	102.421	3	1.34367
2011-05-26	102.307	4	-0.111367
2011-05-27	102.62	5	0.305475
2011-05-30	102.62	1	0
2011-05-31	101.481	2	-1.11613
2011-06-01	101.253	3	-0.224925
2011-06-02	102.051	4	0.785035
2011-06-03	101.453	5	-0.587705
2011-06-06	103.56	1	2.05555
2011-06-07	102.62	2	-0.911831
2011-06-08	101.367	3	-1.22853
2011-06-09	102.449	4	1.06175
2011-06-10	102.991	5	0.527649
2011-06-13	102.307	1	-0.666351
2011-06-14	103.987	2	1.62878
2011-06-15	102.649	3	-1.29505
2011-06-16	101.225	4	-1.39696
2011-06-17	101.538	5	0.308735
2011-06-20	104.073	1	2.46595
2011-06-21	107.861	2	3.57508
2011-06-22	106.95	3	-0.848193
2011-06-23	106.579	4	-0.347494
2011-06-24	109.741	5	2.92365
2011-06-27	109.114	1	-0.572984
2011-06-28	107.434	2	-1.55165
2011-06-29	106.408	3	-0.959594
2011-06-30	106.579	4	0.160573
2011-07-01	106.579	5	0
2011-07-04	106.579	1	0
2011-07-05	105.683	2	-0.844245
2011-07-06	106.46	3	0.732528
2011-07-07	106.917	4	0.42835
2011-07-08	106.693	5	-0.209728
2011-07-11	104.113	1	-2.44787
2011-07-12	105.121	2	0.963522
2011-07-13	105.655	3	0.5067
2011-07-14	106.984	4	1.25002
2011-07-15	107.12	5	0.127041
2011-07-18	107.411	1	0.27129
2011-07-19	108.584	2	1.08615
2011-07-20	107.707	3	-0.810949
2011-07-21	106.04	4	-1.55982
2011-07-22	105.867	5	-0.163279
2011-07-25	106.921	1	0.990665
2011-07-26	107.035	2	0.106564
2011-07-27	107.12	3	0.0793818
2011-07-28	108.402	4	1.18968
2011-07-29	108.516	5	0.105109
2011-08-01	108.801	1	0.26229
2011-08-02	109	2	0.182736
2011-08-03	107.519	3	-1.36803
2011-08-04	103.532	4	-3.77868
2011-08-05	99.259	5	-4.21481
2011-08-08	94.759	1	-4.63958
2011-08-09	92.709	2	-2.18713
2011-08-10	87.012	3	-6.34195
2011-08-11	89.462	4	2.77679
2011-08-12	91.398	5	2.14096
2011-08-15	92.31	1	0.992888
2011-08-16	92.68	2	0.400022
2011-08-17	93.649	3	1.04011
2011-08-18	93.705	4	0.0597799
2011-08-19	93.506	5	-0.212594
2011-08-22	94.361	1	0.910225
2011-08-23	92.965	2	-1.49048
2011-08-24	91.285	3	-1.82366
2011-08-25	91.569	4	0.310631
2011-08-26	91.94	5	0.40434
2011-08-29	89.547	1	-2.63726
2011-08-30	89.775	2	0.254291
2011-08-31	90.459	3	0.759017
2011-09-01	91.543	4	1.19121
2011-09-02	91.573	5	0.0327661
2011-09-05	91.573	1	0
2011-09-06	93.705	2	2.30151
2011-09-07	95.05	3	1.42515
2011-09-08	94.579	4	-0.49676
2011-09-09	95.084	5	0.532525
2011-09-12	95.114	1	0.0315461
2011-09-13	94.41	2	-0.742917
2011-09-14	93.745	3	-0.706867
2011-09-15	92.035	4	-1.84094
2011-09-16	91.81	5	-0.244772
2011-09-19	91.911	1	0.109949
2011-09-20	93.487	2	1.70017
2011-09-21	92.923	3	-0.60512
2011-09-22	92.923	4	0
2011-09-23	87.383	5	-6.14704
2011-09-26	84.62	1	-3.21301
2011-09-27	85.275	2	0.771068
2011-09-28	85.047	3	-0.267728
2011-09-29	85.389	4	0.401324
2011-09-30	84.335	5	-1.24203
2011-10-03	84.42	1	0.100738
2011-10-04	85.446	2	1.20803
2011-10-05	85.446	3	0
2011-10-06	86.727	4	1.48807
2011-10-07	86.613	5	-0.131533
2011-10-10	87.468	1	0.982309
2011-10-11	90.231	2	3.11
2011-10-12	90.544	3	0.346287
2011-10-13	92.993	4	2.66883
2011-10-14	95.414	5	2.57011
2011-10-17	95.016	1	-0.418002
2011-10-18	96.098	2	1.13232
2011-10-19	95.842	3	-0.26675
2011-10-20	96.497	4	0.681092
2011-10-21	96.952	5	0.470409
2011-10-24	99.202	1	2.29422
2011-10-25	99.658	2	0.458615
2011-10-26	101.025	3	1.36237
2011-10-27	99.63	4	-1.39047
2011-10-28	96.981	5	-2.69482
2011-10-31	96.468	1	-0.530374
2011-11-01	96.816	2	0.360092
2011-11-02	97.366	3	0.56648
2011-11-03	97.289	4	-0.0791143
2011-11-04	98.194	5	0.925918
2011-11-07	97.683	1	-0.521757
2011-11-08	97.334	2	-0.357918
2011-11-09	96.149	3	-1.22493
2011-11-10	95.963	4	-0.193637
2011-11-11	95.363	5	-0.627204
2011-11-14	94.323	1	-1.09656
2011-11-15	94.807	2	0.511818
2011-11-16	94.611	3	-0.20695
2011-11-17	95.942	4	1.39701
2011-11-18	97.978	5	2.09991
2011-11-21	98.234	1	0.260942
2011-11-22	98.861	2	0.636244
2011-11-23	97.579	3	-1.30525
2011-11-24	97.579	4	0
2011-11-25	97.892	5	0.320252
2011-11-28	99.316	1	1.44419
2011-11-29	98.32	2	-1.00792
2011-11-30	98.177	3	-0.145549
2011-12-01	98.377	4	0.203506
2011-12-02	98.433	5	0.0569077
2011-12-05	98.718	1	0.289119
2011-12-06	98.006	2	-0.72386
2011-12-07	96.895	3	-1.14008
2011-12-08	95.756	4	-1.18246
2011-12-09	94.361	5	-1.46754
2011-12-12	92.509	1	-1.98219
2011-12-13	92.936	2	0.460515
2011-12-14	93.221	3	0.306193
2011-12-15	92.737	4	-0.520549
2011-12-16	93.221	5	0.520549
2011-12-19	93.478	1	0.27531
2011-12-20	93.705	2	0.242544
2011-12-21	92.965	3	-0.792847
2011-12-22	93.421	4	0.489308
2011-12-23	95.3	5	1.99137
2011-12-26	95.3	1	0
2011-12-27	96.81	2	1.57205
2011-12-28	95.785	3	-1.06442
2011-12-29	96.013	4	0.23775
2011-12-30	96.269	5	0.266276
2012-01-02	96.269	1	0
2012-01-03	98.574	2	2.36612
2012-01-04	101.272	3	2.70024
2012-01-05	100.843	4	-0.424511
2012-01-06	100.775	5	-0.0674543
2012-01-09	106.471	1	5.49823
2012-01-10	117.864	2	10.1659
2012-01-11	106.617	3	-10.0288
2012-01-12	100.921	4	-5.49049
2012-01-13	102.814	5	1.85835
2012-01-16	102.814	1	0
2012-01-17	102.544	2	-0.262956
2012-01-18	104.8	3	2.17618
2012-01-19	107.827	4	2.84743
2012-01-20	113.523	5	5.14774
2012-01-23	114.473	1	0.833353
2012-01-24	111.905	2	-2.26887
2012-01-25	110.909	3	-0.894025
2012-01-26	110.937	4	0.0252427
2012-01-27	114.583	5	3.2337
2012-01-30	115.238	1	0.57001
2012-01-31	115.864	2	0.541753
2012-02-01	112.931	3	-2.56401
2012-02-02	113.13	4	0.176059
2012-02-03	110.994	5	-1.90615
2012-02-06	111.25	1	0.230378
2012-02-07	107.861	2	-3.09366
2012-02-08	105.412	3	-2.29669
2012-02-09	104.728	4	-0.650997
2012-02-10	102.392	5	-2.25579
2012-02-13	101.168	1	-1.20261
2012-02-14	100.94	2	-0.225622
2012-02-15	101.965	3	1.01033
2012-02-16	101.908	4	-0.0559172
2012-02-17	103.133	5	1.1949
2012-02-20	103.133	1	0
2012-02-21	102.791	2	-0.332162
2012-02-22	101.851	3	-0.918684
2012-02-23	104.7	4	2.75882
2012-02-24	104.813	5	0.107869
2012-02-27	103.19	1	-1.56059
2012-02-28	104.785	2	1.53387
2012-02-29	105.81	3	0.97344
2012-03-01	106.767	4	0.900386
2012-03-02	107.967	5	1.11767
2012-03-05	108.59	1	0.57537
2012-03-06	107.181	2	-1.30603
2012-03-07	106.095	3	-1.01841
2012-03-08	106.403	4	0.289885
2012-03-09	105.514	5	-0.839013
2012-03-12	103.579	1	-1.8509
2012-03-13	103.429	2	-0.144922
2012-03-14	104.054	3	0.602461
2012-03-15	103.836	4	-0.209726
2012-03-16	103.503	5	-0.321213
2012-03-19	101.056	1	-2.39258
2012-03-20	97.072	2	-4.02218
2012-03-21	93.819	3	-3.40856
2012-03-22	92.395	4	-1.52945
2012-03-23	92.452	5	0.0616726
2012-03-26	93.535	1	1.16461
2012-03-27	93.164	2	-0.397432
2012-03-28	93.022	3	-0.152536
2012-03-29	93.478	4	0.489009
2012-03-30	91.997	5	-1.59701
2012-04-02	90.943	1	-1.1523
2012-04-03	91.171	2	0.250393
2012-04-04	90.174	3	-1.09957
2012-04-05	90.174	4	0
2012-04-06	90.174	5	0
2012-04-09	87.012	1	-3.56951
2012-04-10	83.965	2	-3.5646
2012-04-11	81.373	3	-3.13565
2012-04-12	83.053	4	2.04354
2012-04-13	83.025	5	-0.0337191
2012-04-16	83.31	1	0.342682
2012-04-17	83.765	2	0.544667
2012-04-18	82.968	3	-0.956027
2012-04-19	83.993	4	1.22785
2012-04-20	85.816	5	2.1472
2012-04-23	81.259	1	-5.45639
2012-04-24	80.803	2	-0.562749
2012-04-25	83.594	3	3.39577
2012-04-26	82.996	4	-0.717933
2012-04-27	84.306	5	1.56606
2012-04-30	80.803	1	-4.24389
2012-05-01	75.69	2	-6.5368
2012-05-02	74.623	3	-1.41973
2012-05-03	72.526	4	-2.85037
2012-05-04	70.952	5	-2.19415
2012-05-07	68.632	1	-3.32447
2012-05-08	66.932	2	-2.50817
2012-05-09	67.424	3	0.732386
2012-05-10	69.401	4	2.89002
2012-05-11	70.493	5	1.56121
2012-05-14	67.179	1	-4.81527
2012-05-15	65.795	2	-2.08169
2012-05-16	65.121	3	-1.02968
2012-05-17	61.308	4	-6.03367
2012-05-18	59.227	5	-3.45328
2012-05-21	62.091	1	4.72235
2012-05-22	63.002	2	1.45654
2012-05-23	60.04	3	-4.81555
2012-05-24	63.372	4	5.40111
2012-05-25	63.799	5	0.671539
2012-05-28	63.799	1	0
2012-05-29	64.768	2	1.50741
2012-05-30	64.398	3	-0.572908
2012-05-31	64.825	4	0.660875
2012-06-01	64.796	5	-0.0447458
2012-06-04	64.682	1	-0.176092
2012-06-05	66.448	2	2.69367
2012-06-06	67.388	3	1.40473
2012-06-07	66.961	4	-0.63566
2012-06-08	65.622	5	-2.01994
2012-06-11	65.366	1	-0.390876
2012-06-12	62.66	2	-4.2279
2012-06-13	63.344	3	1.08569
2012-06-14	62.546	4	-1.26779
2012-06-15	62.204	5	-0.548298
2012-06-18	63.173	1	1.54577
2012-06-19	65.366	2	3.41253
2012-06-20	66.505	3	1.72749
2012-06-21	65.793	4	-1.07637
2012-06-22	65.907	5	0.173121
2012-06-25	65.594	1	-0.476043
2012-06-26	63.315	2	-3.5362
2012-06-27	64.625	3	2.04791
2012-06-28	65.081	4	0.703132
2012-06-29	69.353	5	6.35768
2012-07-02	66.82	1	-3.7207
2012-07-03	68.734	2	2.82415
2012-07-04	68.734	3	0
2012-07-05	70.994	4	3.23514
2012-07-06	72.097	5	1.54171
2012-07-09	73.151	1	1.45134
2012-07-10	72.572	2	-0.794663
2012-07-11	70.871	3	-2.37178
2012-07-12	70.007	4	-1.22661
2012-07-13	69.143	5	-1.24184
2012-07-16	66.657	1	-3.66168
2012-07-17	66.391	2	-0.399856
2012-07-18	65.474	3	-1.39084
2012-07-19	63.598	4	-2.90711
2012-07-20	62.315	5	-2.03799
2012-07-23	61.977	1	-0.543882
2012-07-24	62.062	2	0.137054
2012-07-25	62.233	3	0.275152
2012-07-26	62.375	4	0.227915
2012-07-27	62.347	5	-0.0448999
2012-07-30	63.743	1	2.21438
2012-07-31	62.575	2	-1.84935
2012-08-01	61.265	3	-2.11571
2012-08-02	61.749	4	0.786906
2012-08-03	63.372	5	2.59443
2012-08-06	62.603	1	-1.22089
2012-08-07	62.945	2	0.544813
2012-08-08	63.913	3	1.52615
2012-08-09	62.603	4	-2.07096
2012-08-10	60.695	5	-3.09519
2012-08-13	59.527	1	-1.94313
2012-08-14	59.527	2	0
2012-08-15	62.29	3	4.53709
2012-08-16	61.549	4	-1.19673
2012-08-17	61.663	5	0.185047
2012-08-20	63.201	1	2.4636
2012-08-21	65.736	2	3.93266
2012-08-22	69.61	3	5.72615
2012-08-23	67.815	4	-2.61248
2012-08-24	67.189	5	-0.927387
2012-08-27	64.825	1	-3.58182
2012-08-28	64.939	2	0.175704
2012-08-29	65.879	3	1.43714
2012-08-30	66.762	4	1.33143
2012-08-31	67.758	5	1.48085
2012-09-03	67.758	1	0
2012-09-04	68.989	2	1.80045
2012-09-05	70.981	3	2.84652
2012-09-06	71.21	4	0.322102
2012-09-07	72.57	5	1.89184
2012-09-10	72.268	1	-0.417018
2012-09-11	70.669	2	-2.23744
2012-09-12	72.135	3	2.05324
2012-09-13	73.32	4	1.62941
2012-09-14	74.577	5	1.69987
2012-09-17	72.895	1	-2.28121
2012-09-18	71.391	2	-2.08482
2012-09-19	71.364	3	-0.037827
2012-09-20	71.235	4	-0.180927
2012-09-21	70.854	5	-0.536285
2012-09-24	67.16	1	-5.35436
2012-09-25	65.281	2	-2.83768
2012-09-26	64.512	3	-1.18498
2012-09-27	65.451	4	1.44505
2012-09-28	65.451	5	0
2012-10-01	64.568	1	-1.35828
2012-10-02	65.822	2	1.92352
2012-10-03	65.936	3	0.173045
2012-10-04	66.05	4	0.172746
2012-10-05	65.793	5	-0.389858
2012-10-08	64.455	1	-2.05461
2012-10-09	63.828	2	-0.977534
2012-10-10	63.372	3	-0.716984
2012-10-11	64.483	4	1.73795
2012-10-12	64.255	5	-0.354208
2012-10-15	64.056	1	-0.310184
2012-10-16	64.341	2	0.443936
2012-10-17	66.391	3	3.13644
2012-10-18	65.081	4	-1.99289
2012-10-19	64.512	5	-0.878139
2012-10-22	63.913	1	-0.932847
2012-10-23	63.258	2	-1.03012
2012-10-24	63.116	3	-0.22473
2012-10-25	64.113	4	1.56728
2012-10-26	63.799	5	-0.490964
2012-10-29	61.606	1	-3.49782
2012-10-30	61.208	2	-0.648137
2012-10-31	60.666	3	-0.889449
2012-11-01	60.429	4	-0.391429
2012-11-02	60.657	5	0.376592
2012-11-05	60.997	1	0.558964
2012-11-06	62.786	2	2.89074
2012-11-07	62.926	3	0.222731
2012-11-08	62.751	4	-0.278492
2012-11-09	61.544	5	-1.94221
2012-11-12	61.016	1	-0.861624
2012-11-13	62.917	2	3.06803
2012-11-14	64.616	3	2.66457
2012-11-15	66.638	4	3.08129
2012-11-16	67.229	5	0.882972
2012-11-19	67.565	1	0.49854
2012-11-20	70.054	2	3.61763
2012-11-21	71.717	3	2.34614
2012-11-22	71.717	4	0
2012-11-23	72.059	5	0.475741
2012-11-26	72.857	1	1.10134
2012-11-27	71.717	2	-1.57708
2012-11-28	70.493	3	-1.72144
2012-11-29	71.119	4	0.884112
2012-11-30	70.578	5	-0.763605
2012-12-03	70.122	1	-0.64819
2012-12-04	70.835	2	1.01166
2012-12-05	71.29	3	0.640284
2012-12-06	71.746	4	0.637604
2012-12-07	71.433	5	-0.437216
2012-12-10	71.86	1	0.595983
2012-12-11	74.11	2	3.08307
2012-12-12	76.332	3	2.95418
2012-12-13	78.325	4	2.57746
2012-12-14	78.696	5	0.472549
2012-12-17	78.895	1	0.252553
2012-12-18	79.749	2	1.07663
2012-12-19	80.889	3	1.41936
2012-12-20	78.639	4	-2.82101
2012-12-21	76.474	5	-2.79169
2012-12-24	75.99	1	-0.634906
2012-12-25	75.99	2	0
2012-12-26	75.078	3	-1.20742
2012-12-27	75.078	4	0
2012-12-28	72.059	5	-4.10423
2012-12-31	66.847	1	-7.50788
2013-01-01	66.847	2	0
2013-01-02	66.467	3	-0.570084
2013-01-03	63.712	4	-4.23327
2013-01-04	64.523	5	1.26488
2013-01-07	63.222	1	-2.03694
2013-01-08	62.537	2	-1.0894
2013-01-09	63.344	3	1.28218
2013-01-10	64.293	4	1.48706
2013-01-11	64.559	5	0.412877
2013-01-14	63.737	1	-1.28143
2013-01-15	63.097	2	-1.0092
2013-01-16	64.242	3	1.7984
2013-01-17	64.295	4	0.0824665
2013-01-18	65.524	5	1.89346
2013-01-21	65.524	1	0
2013-01-22	66.207	2	1.03697
2013-01-23	66.363	3	0.235347
2013-01-24	65.11	4	-1.90615
2013-01-25	65.224	5	0.174935
2013-01-28	65.594	1	0.565673
2013-01-29	65.679	2	0.129501
2013-01-30	68.527	3	4.24486
2013-01-31	68.471	4	-0.081753
2013-02-01	69.952	5	2.1399
2013-02-04	68.983	1	-1.39492
2013-02-05	69.952	2	1.39492
2013-02-06	68.898	3	-1.51821
2013-02-07	69.154	4	0.370875
2013-02-08	68.698	5	-0.661581
2013-02-11	69.183	1	0.703508
2013-02-12	72.971	2	5.33069
2013-02-13	73.911	3	1.27996
2013-02-14	74.623	4	0.95871
2013-02-15	73.939	5	-0.920834
2013-02-18	73.939	1	0
2013-02-19	71.148	2	-3.84782
2013-02-20	72.031	3	1.23344
2013-02-21	73.426	4	1.91815
2013-02-22	73.626	5	0.272013
2013-02-25	73.911	1	0.386344
2013-02-26	72.486	2	-1.94682
2013-02-27	71.575	3	-1.26476
2013-02-28	72.8	4	1.69701
2013-03-01	68.919	5	-5.47841
2013-03-04	70.61	1	2.42399
2013-03-05	70.328	2	-0.400176
2013-03-06	69.923	3	-0.577538
2013-03-07	70.872	4	1.34808
2013-03-08	75.357	5	6.13614
2013-03-11	77.135	1	2.33203
2013-03-12	77.718	2	0.752976
2013-03-13	77.431	3	-0.369967
2013-03-14	77.139	4	-0.377823
2013-03-15	78.396	5	1.61639
2013-03-18	78.616	1	0.280234
2013-03-19	78.809	2	0.245196
2013-03-20	76.375	3	-3.13718
2013-03-21	77.613	4	1.60795
2013-03-22	77.699	5	0.110745
2013-03-25	78.297	1	0.76669
2013-03-26	78.809	2	0.651792
2013-03-27	77.898	3	-1.16269
2013-03-28	76.873	4	-1.32456
2013-03-29	76.873	5	0
2013-04-01	76.189	1	-0.893761
2013-04-02	78.24	2	2.65639
2013-04-03	78.866	3	0.796918
2013-04-04	79.578	4	0.898746
2013-04-05	83.395	5	4.68507
2013-04-08	82.142	1	-1.51389
2013-04-09	83.167	2	1.24012
2013-04-10	82.797	3	-0.445881
2013-04-11	81.088	4	-2.08568
2013-04-12	81.601	5	0.630653
2013-04-15	84.477	1	3.46378
2013-04-16	83.737	2	-0.879837
2013-04-17	83.993	3	0.305253
2013-04-18	83.082	4	-1.09054
2013-04-19	83.708	5	0.750648
2013-04-22	81.601	1	-2.5493
2013-04-23	80.661	2	-1.15863
2013-04-24	81.971	3	1.61103
2013-04-25	81.601	4	-0.452401
2013-04-26	79.037	5	-3.19254
2013-04-29	81.259	1	2.77255
2013-04-30	79.977	2	-1.59025
2013-05-01	79.176	3	-1.00659
2013-05-02	81.443	4	2.82302
2013-05-03	81.897	5	0.555897
2013-05-06	80.049	1	-2.28234
2013-05-07	79.132	2	-1.15216
2013-05-08	81.561	3	3.02339
2013-05-09	81.641	4	0.098038
2013-05-10	81.483	5	-0.193718
2013-05-13	83.606	1	2.57209
2013-05-14	83.632	2	0.0310934
2013-05-15	82.317	3	-1.58486
2013-05-16	81.515	4	-0.97906
2013-05-17	80.642	5	-1.07674
2013-05-20	81.754	1	1.36951
2013-05-21	81.202	2	-0.677486
2013-05-22	82.683	3	1.80741
2013-05-23	83.708	4	1.23205
2013-05-24	83.68	5	-0.0334552
2013-05-27	83.68	1	0
2013-05-28	84.363	2	0.812892
2013-05-29	86.642	3	2.66558
2013-05-30	87.24	4	0.687825
2013-05-31	86.129	5	-1.28168
2013-06-03	85.788	1	-0.396704
2013-06-04	87.069	2	1.48218
2013-06-05	85.588	3	-1.71558
2013-06-06	85.189	4	-0.467277
2013-06-07	86.015	5	0.964938
2013-06-10	86.357	1	0.396817
2013-06-11	86.414	2	0.0659833
2013-06-12	84.677	3	-2.03057
2013-06-13	83.025	4	-1.97023
2013-06-14	83.879	5	1.02335
2013-06-17	83.395	1	-0.578693
2013-06-18	83.053	2	-0.41094
2013-06-19	81.658	3	-1.69392
2013-06-20	81.544	4	-0.139704
2013-06-21	80.775	5	-0.947524
2013-06-24	79.949	1	-1.02786
2013-06-25	76.445	2	-4.48174
2013-06-26	72.8	3	-4.88556
2013-06-27	73.056	4	0.351032
2013-06-28	73.312	5	0.349804
2013-07-01	74.192	1	1.1932
2013-07-02	75.454	2	1.68669
2013-07-03	75.973	3	0.685481
2013-07-04	75.973	4	0
2013-07-05	76.368	5	0.518575
2013-07-08	76.901	1	0.695512
2013-07-09	77.875	2	1.25861
2013-07-10	77.199	3	-0.871847
2013-07-11	77.159	4	-0.0518276
2013-07-12	79.277	5	2.70798
2013-07-15	79.341	1	0.080697
2013-07-16	81.293	2	2.43049
2013-07-17	82.484	3	1.45444
2013-07-18	81.536	4	-1.15597
2013-07-19	82.449	5	1.11353
2013-07-22	83.224	1	0.935585
2013-07-23	80.889	2	-2.84579
2013-07-24	83.139	3	2.74361
2013-07-25	83.253	4	0.137026
2013-07-26	82.028	5	-1.48235
2013-07-29	83.167	1	1.379
2013-07-30	83.053	2	-0.137168
2013-07-31	82.085	3	-1.17237
2013-08-01	82.541	4	0.553984
2013-08-02	80.889	5	-2.02173
2013-08-05	81.259	1	0.456374
2013-08-06	80.006	2	-1.554
2013-08-07	78.895	3	-1.39838
2013-08-08	78.866	4	-0.0367645
2013-08-09	76.445	5	-3.11787
2013-08-12	74.623	1	-2.41228
2013-08-13	75.221	2	0.798168
2013-08-14	75.192	3	-0.0385605
2013-08-15	74.594	4	-0.798477
2013-08-16	75.135	5	0.722642
2013-08-19	77.414	1	2.98811
2013-08-20	76.844	2	-0.739025
2013-08-21	78.553	3	2.19962
2013-08-22	78.895	4	0.43443
2013-08-23	77.243	5	-2.11616
2013-08-26	78.069	1	1.06368
2013-08-27	77.214	2	-1.10123
2013-08-28	77.87	3	0.845998
2013-08-29	78.724	4	1.09073
2013-08-30	78.24	5	-0.616704
2013-09-02	78.24	1	0
2013-09-03	75.572	2	-3.46952
2013-09-04	75.952	3	0.501572
2013-09-05	75.694	4	-0.340266
2013-09-06	75.969	5	0.362647
2013-09-09	78.382	1	3.12689
2013-09-10	78.154	2	-0.291307
2013-09-11	77.129	3	-1.32019
2013-09-12	79.394	4	2.89435
2013-09-13	79.897	5	0.631551
2013-09-16	77.414	1	-3.15707
2013-09-17	73.033	2	-5.82562
2013-09-18	72.606	3	-0.586383
2013-09-19	71.972	4	-0.877041
2013-09-20	72.156	5	0.255329
2013-09-23	72.657	1	0.69193
2013-09-24	73.398	2	1.01469
2013-09-25	75.05	3	2.22579
2013-09-26	73.626	4	-1.91563
2013-09-27	74.651	5	1.38257
2013-09-30	75.705	1	1.40203
2013-10-01	73.882	2	-2.4375
2013-10-02	73.597	3	-0.386496
2013-10-03	72.657	4	-1.28545
2013-10-04	73.54	5	1.20797
2013-10-07	73.74	1	0.271592
2013-10-08	74.594	2	1.15147
2013-10-09	74.452	3	-0.190545
2013-10-10	73.569	4	-1.19309
2013-10-11	73.284	5	-0.388144
2013-10-14	72.686	1	-0.819351
2013-10-15	70.977	2	-2.37929
2013-10-16	70.749	3	-0.321748
2013-10-17	67.986	4	-3.98366
2013-10-18	67.815	5	-0.251839
2013-10-21	67.075	1	-1.0972
2013-10-22	66.932	2	-0.213422
2013-10-23	68.926	3	2.93563
2013-10-24	69.268	4	0.494957
2013-10-25	69.183	5	-0.122787
2013-10-28	68.129	1	-1.53522
2013-10-29	67.331	2	-1.17822
2013-10-30	67.844	3	0.75902
2013-10-31	69.724	4	2.73336
2013-11-01	70.831	5	1.57522
2013-11-04	68.771	1	-2.95146
2013-11-05	70.424	2	2.3752
2013-11-06	71.214	3	1.11553
2013-11-07	71.376	4	0.227225
2013-11-08	74.987	5	4.93531
2013-11-11	76.326	1	1.76989
2013-11-12	77.374	2	1.36372
2013-11-13	76.52	3	-1.10987
2013-11-14	77.945	4	1.84513
2013-11-15	78.948	5	1.2786
2013-11-18	78.792	1	-0.197794
2013-11-19	77.896	2	-1.14369
2013-11-20	78.684	3	1.00652
2013-11-21	79.151	4	0.591759
2013-11-22	79.436	5	0.359425
2013-11-25	79.806	1	0.464702
2013-11-26	79.92	2	0.142744
2013-11-27	80.034	3	0.142541
2013-11-28	80.034	4	0
2013-11-29	80.347	5	0.390321
2013-12-02	80.091	1	-0.319127
2013-12-03	78.496	2	-2.01158
2013-12-04	77.841	3	-0.837938
2013-12-05	79.123	4	1.63353
2013-12-06	79.237	5	0.143976
2013-12-09	80.575	1	1.67451
2013-12-10	81.458	2	1.08991
2013-12-11	82.626	3	1.42369
2013-12-12	83.822	4	1.43711
2013-12-13	82.626	5	-1.43711
2013-12-16	81.43	1	-1.45806
2013-12-17	81.942	2	0.626792
2013-12-18	81.914	3	-0.0341764
2013-12-19	81.686	4	-0.278729
2013-12-20	79.151	5	-3.15252
2013-12-23	77.756	1	-1.77817
2013-12-24	79.18	2	1.8148
2013-12-25	79.18	3	0
2013-12-26	80.974	4	2.24044
2013-12-27	78.752	5	-2.78244
2013-12-30	80.319	1	1.97025
2013-12-31	79.294	2	-1.28437
2014-01-01	79.294	3	0
2014-01-02	78.61	4	-0.866355
2014-01-03	79.66	5	1.32687
2014-01-06	81.885	1	2.75482
2014-01-07	81.779	2	-0.129534
2014-01-08	81.192	3	-0.720377
2014-01-09	81.185	4	-0.00862191
2014-01-10	84.43	5	3.91923
2014-01-13	84.595	1	0.195237
2014-01-14	82.882	2	-2.04573
2014-01-15	82.911	3	0.0349834
2014-01-16	80.86	4	-2.50485
2014-01-17	81.122	5	0.323493
2014-01-20	81.122	1	0
2014-01-21	81.81	2	0.844529
2014-01-22	82.408	3	0.728303
2014-01-23	82.427	4	0.0230534
2014-01-24	81.715	5	-0.867547
2014-01-27	79.778	1	-2.39898
2014-01-28	79.521	2	-0.322664
2014-01-29	79.18	3	-0.42974
2014-01-30	80.148	4	1.21512
2014-01-31	81.658	5	1.86649
2014-02-03	81.401	1	-0.315224
2014-02-04	82.227	2	1.00962
2014-02-05	83.367	3	1.37688
2014-02-06	83.367	4	0
2014-02-07	84.221	5	1.01917
2014-02-10	84.164	1	-0.067702
2014-02-11	83.281	2	-1.05468
2014-02-12	83.623	3	0.409817
2014-02-13	83.708	4	0.101595
2014-02-14	82.626	5	-1.30102
2014-02-17	82.626	1	0
2014-02-18	82.284	2	-0.414772
2014-02-19	82.056	3	-0.277474
2014-02-20	84.136	4	2.50326
2014-02-21	83.537	5	-0.714489
2014-02-24	83.651	1	0.136373
2014-02-25	83.48	2	-0.20463
2014-02-26	83.651	3	0.20463
2014-02-27	83.68	4	0.0346618
2014-02-28	83.594	5	-0.102825
2014-03-03	84.073	1	0.571372
2014-03-04	87.2	2	3.65189
2014-03-05	88.636	3	1.63338
2014-03-06	89.133	4	0.559154
2014-03-07	88.246	5	-1.00013
2014-03-10	88.379	1	0.150602
2014-03-11	88.807	2	0.483109
2014-03-12	87.242	3	-1.77796
2014-03-13	85.947	4	-1.4955
2014-03-14	85.199	5	-0.874113
2014-03-17	86.674	1	1.71643
2014-03-18	86.921	2	0.284571
2014-03-19	86.678	3	-0.279956
2014-03-20	87.043	4	0.420215
2014-03-21	86.699	5	-0.39599
2014-03-24	85.816	1	-1.02369
2014-03-25	84.193	2	-1.90937
2014-03-26	84.392	3	0.236083
2014-03-27	85.218	4	0.974007
2014-03-28	85.389	5	0.200461
2014-03-31	87.838	1	2.82769
2014-04-01	85.674	2	-2.49448
2014-04-02	87.126	3	1.6806
2014-04-03	87.439	4	0.358606
2014-04-04	87.24	5	-0.227847
2014-04-07	87.212	1	-0.0321005
2014-04-08	87.981	2	0.877895
2014-04-09	90.43	3	2.74552
2014-04-10	92.224	4	1.96443
2014-04-11	92.851	5	0.677566
2014-04-14	91.74	1	-1.20376
2014-04-15	92.509	2	0.834745
2014-04-16	93.335	3	0.888923
2014-04-17	92.766	4	-0.611498
2014-04-18	92.766	5	0
2014-04-21	92.139	1	-0.678189
2014-04-22	92.709	2	0.616725
2014-04-23	94.275	3	1.67505
2014-04-24	94.475	4	0.211921
2014-04-25	93.99	5	-0.514686
2014-04-28	93.107	1	-0.943902
2014-04-29	91.883	2	-1.32333
2014-04-30	91.484	3	-0.435193
2014-05-01	89.606	4	-2.07418
2014-05-02	91.341	5	1.91775
2014-05-05	91.535	1	0.212166
2014-05-06	91.302	2	-0.254872
2014-05-07	92.936	3	1.77384
2014-05-08	92.031	4	-0.978561
2014-05-09	91.678	5	-0.384304
2014-05-12	92.067	1	0.423414
2014-05-13	92.395	2	0.355629
2014-05-14	92.946	3	0.594581
2014-05-15	89.714	4	-3.53918
2014-05-16	88.875	5	-0.939594
2014-05-19	89.446	1	0.64042
2014-05-20	89.249	2	-0.220488
2014-05-21	90.459	3	1.34665
2014-05-22	91.057	4	0.658897
2014-05-23	91.057	5	0
2014-05-26	91.057	1	0
2014-05-27	91.057	2	0
2014-05-28	91	3	-0.0626178
2014-05-29	90.06	4	-1.03834
2014-05-30	91.997	5	2.12799
2014-06-02	92.452	1	0.493362
2014-06-03	93.905	2	1.5594
2014-06-04	94.389	3	0.514091
2014-06-05	94.759	4	0.391229
2014-06-06	94.56	5	-0.210227
2014-06-09	95.073	1	0.541046
2014-06-10	94.987	2	-0.0904977
2014-06-11	93.677	3	-1.38873
2014-06-12	93.364	4	-0.334686
2014-06-13	94.845	5	1.57381
2014-06-16	93.364	1	-1.57381
2014-06-17	93.876	2	0.546893
2014-06-18	93.705	3	-0.182321
2014-06-19	92.965	4	-0.792847
2014-06-20	92.082	5	-0.954359
2014-06-23	91.94	1	-0.154329
2014-06-24	87.781	2	-4.62911
2014-06-25	86.243	3	-1.76762
2014-06-26	84.193	4	-2.40571
2014-06-27	84.677	5	0.573224
2014-06-30	83.594	1	-1.28723
2014-07-01	84.024	2	0.513073
2014-07-02	84.493	3	0.556622
2014-07-03	84.791	4	0.352071
2014-07-04	84.791	5	0
2014-07-07	85.789	1	1.17014
2014-07-08	86.272	2	0.56143
2014-07-09	86.431	3	0.184131
2014-07-10	85.672	4	-0.882036
2014-07-11	85.672	5	0
2014-07-14	86.158	1	0.565677
2014-07-15	87.041	2	1.01965
2014-07-16	87.181	3	0.160715
2014-07-17	87.269	4	0.100889
2014-07-18	87.766	5	0.567888
2014-07-21	88.199	1	0.492144
2014-07-22	88.351	2	0.172189
2014-07-23	87.952	3	-0.452631
2014-07-24	86.443	4	-1.7306
2014-07-25	85.816	5	-0.727977
2014-07-28	85.987	1	0.199065
2014-07-29	84.335	2	-1.93992
2014-07-30	81.829	3	-3.01653
2014-07-31	82.598	4	0.935376
2014-08-01	81.999	5	-0.727842
2014-08-04	83.082	1	1.3121
2014-08-05	82.711	2	-0.447547
2014-08-06	82.569	3	-0.17183
2014-08-07	81.629	4	-1.14497
2014-08-08	82.199	5	0.695855
2014-08-11	83.31	1	1.34255
2014-08-12	83.196	2	-0.136932
2014-08-13	83.11	3	-0.103424
2014-08-14	84.933	4	2.16977
2014-08-15	85.788	5	1.00164
2014-08-18	85.104	1	-0.80051
2014-08-19	84.563	2	-0.637722
2014-08-20	84.449	3	-0.134902
2014-08-21	84.363	4	-0.101889
2014-08-22	83.993	5	-0.439545
2014-08-25	82.313	1	-2.02044
2014-08-26	86.357	2	4.79608
2014-08-27	85.617	3	-0.860601
2014-08-28	84.62	4	-1.17132
2014-08-29	85.474	5	1.00416
2014-09-01	85.474	1	0
2014-09-02	84.931	2	-0.637307
2014-09-03	85.195	3	0.310358
2014-09-04	84.796	4	-0.469437
2014-09-05	85.117	5	0.377841
2014-09-08	84.952	1	-0.194039
2014-09-09	84.996	2	0.0517805
2014-09-10	85.246	3	0.2937
2014-09-11	84.369	4	-1.03412
2014-09-12	84.09	5	-0.331238
2014-09-15	83.205	1	-1.05802
2014-09-16	82.024	2	-1.42956
2014-09-17	81.743	3	-0.343171
2014-09-18	82.271	4	0.64385
2014-09-19	81.954	5	-0.386056
2014-09-22	82.484	1	0.644622
2014-09-23	81.515	2	-1.18173
2014-09-24	81.344	3	-0.209998
2014-09-25	80.091	4	-1.55236
2014-09-26	82.028	5	2.38972
2014-09-29	82.598	1	0.692481
2014-09-30	83.167	2	0.686517
2014-10-01	83.281	3	0.13698
2014-10-02	82.313	4	-1.16914
2014-10-03	81.003	5	-1.60429
2014-10-06	81.885	1	1.08296
2014-10-07	82.284	2	0.486085
2014-10-08	82.37	3	0.104461
2014-10-09	82.199	4	-0.207816
2014-10-10	80.177	5	-2.49064
2014-10-13	77.756	1	-3.0661
2014-10-14	78.211	2	0.583458
2014-10-15	79.607	3	1.76917
2014-10-16	78.354	4	-1.5865
2014-10-17	78.268	5	-0.109819
2014-10-20	77.983	1	-0.364798
2014-10-21	78.866	2	1.12594
2014-10-22	79.721	3	1.07828
2014-10-23	80.091	4	0.463045
2014-10-24	80.177	5	0.10732
2014-10-27	78.639	1	-1.93689
2014-10-28	78.838	2	0.252735
2014-10-29	79.123	3	0.360849
2014-10-30	79.208	4	0.10737
2014-10-31	79.094	5	-0.144029
2014-11-03	76.744	1	-3.01618
2014-11-04	76.464	2	-0.365517
2014-11-05	75.608	3	-1.12579
2014-11-06	74.849	4	-1.00893
2014-11-07	73.018	5	-2.47668
2014-11-10	71.518	1	-2.07568
2014-11-11	73.892	2	3.26554
2014-11-12	72.623	3	-1.73229
2014-11-13	73.649	4	1.40289
2014-11-14	75.021	5	1.84575
2014-11-17	76.73	1	2.25247
2014-11-18	78.342	2	2.07911
2014-11-19	79.303	3	1.21921
2014-11-20	81.84	4	3.14902
2014-11-21	82.797	5	1.16257
2014-11-24	84.848	1	2.44696
2014-11-25	85.132	2	0.334157
2014-11-26	85.36	3	0.267461
2014-11-27	85.36	4	0
2014-11-28	85.531	5	0.200128
2014-12-01	84.392	1	-1.34063
2014-12-02	84.136	2	-0.303807
2014-12-03	85.389	3	1.47827
2014-12-04	84.534	4	-1.00635
2014-12-05	84.363	5	-0.20249
2014-12-08	84.534	1	0.20249
2014-12-09	84.648	2	0.134766
2014-12-10	84.477	3	-0.202217
2014-12-11	85.189	4	0.839301
2014-12-12	85.132	5	-0.0669324
2014-12-15	83.936	1	-1.41484
2014-12-16	83.737	2	-0.237367
2014-12-17	84.278	3	0.643992
2014-12-18	82.427	4	-2.22078
2014-12-19	80.946	5	-1.81308
2014-12-22	79.949	1	-1.23933
2014-12-23	79.265	2	-0.859226
2014-12-24	81.316	3	2.55461
2014-12-25	81.316	4	0
2014-12-26	80.177	5	-1.41061
2014-12-29	79.949	1	-0.284776
2014-12-30	79.721	2	-0.285589
2014-12-31	79.635	3	-0.107934
2015-01-01	79.635	4	0
2015-01-02	81.971	5	2.89118
2015-01-05	83.435	1	1.77024
2015-01-06	81.02	2	-2.93718
2015-01-07	81.23	3	0.25886
2015-01-08	80.385	4	-1.0457
2015-01-09	81.082	5	0.86334
2015-01-12	81.563	1	0.591474
2015-01-13	81.654	2	0.111508
2015-01-14	81.806	3	0.185978
2015-01-15	83.196	4	1.68487
2015-01-16	82.909	5	-0.345565
2015-01-19	82.909	1	0
2015-01-20	82.814	2	-0.114649
2015-01-21	82.903	3	0.107412
2015-01-22	82.805	4	-0.11828
2015-01-23	83.253	5	0.539572
2015-01-26	82.028	1	-1.48235
2015-01-27	80.148	2	-2.31857
2015-01-28	77.129	3	-3.83956
2015-01-29	76.559	4	-0.741766
2015-01-30	79.521	5	3.79595
2015-02-02	79.066	1	-0.573819
2015-02-03	79.208	2	0.179436
2015-02-04	78.268	3	-1.19385
2015-02-05	78.354	4	0.109819
2015-02-06	77.613	5	-0.950208
2015-02-09	79.379	1	2.24989
2015-02-10	77.015	2	-3.02336
2015-02-11	76.474	3	-0.704939
2015-02-12	76.787	4	0.408454
2015-02-13	77.898	5	1.43649
2015-02-16	77.898	1	0
2015-02-17	77.699	2	-0.255789
2015-02-18	75.591	3	-2.75052
2015-02-19	74.879	4	-0.946375
2015-02-20	74.423	5	-0.610844
2015-02-23	71.774	1	-3.62427
2015-02-24	70.607	2	-1.6393
2015-02-25	70.55	3	-0.0807611
2015-02-26	69.496	4	-1.50525
2015-02-27	69.012	5	-0.698879
2015-03-02	72.247	1	4.58104
2015-03-03	66.876	2	-7.72506
2015-03-04	67.417	3	0.805705
2015-03-05	68.047	4	0.930143
2015-03-06	66.306	5	-2.59183
2015-03-09	68.915	1	3.85935
2015-03-10	68.013	2	-1.3175
2015-03-11	67.711	3	-0.445022
2015-03-12	65.611	4	-3.15053
2015-03-13	65.546	5	-0.0991179
2015-03-16	66.469	1	1.39835
2015-03-17	64.694	2	-2.70672
2015-03-18	64.783	3	0.137476
2015-03-19	61.077	4	-5.89079
2015-03-20	65.366	5	6.78669
2015-03-23	70.55	1	7.63194
2015-03-24	72.116	2	2.19543
2015-03-25	72.914	3	1.10047
2015-03-26	72.6	4	-0.431574
2015-03-27	72.316	5	-0.391952
2015-03-30	73.341	1	1.40744
2015-03-31	71.176	2	-2.99641
2015-04-01	70.721	3	-0.641312
2015-04-02	71.262	4	0.762067
2015-04-03	71.262	5	0
2015-04-06	69.24	1	-2.87845
2015-04-07	68.727	2	-0.74366
2015-04-08	69.069	3	0.496387
2015-04-09	67.388	4	-2.4639
2015-04-10	65.252	5	-3.22103
2015-04-13	63.828	1	-2.20647
2015-04-14	64.711	2	1.37392
2015-04-15	65.708	3	1.52895
2015-04-16	65.85	4	0.215874
2015-04-17	65.651	5	-0.30266
2015-04-20	64.654	1	-1.53029
2015-04-21	64.369	2	-0.441782
2015-04-22	65.366	3	1.53701
2015-04-23	67.132	4	2.66586
2015-04-24	65.024	5	-3.19044
2015-04-27	67.758	1	4.11861
2015-04-28	68.214	2	0.670729
2015-04-29	67.616	3	-0.880518
2015-04-30	65.679	4	-2.90654
2015-05-01	68.098	5	3.61686
2015-05-04	68.619	1	0.762162
2015-05-05	68.772	2	0.222722
2015-05-06	68.469	3	-0.44156
2015-05-07	66.448	4	-2.99614
2015-05-08	68.106	5	2.46456
2015-05-11	67.54	1	-0.83453
2015-05-12	67.316	2	-0.332207
2015-05-13	66.329	3	-1.47707
2015-05-14	66.021	4	-0.465433
2015-05-15	64.238	5	-2.73779
2015-05-18	62.825	1	-2.22419
2015-05-19	65.358	2	3.95268
2015-05-20	66.494	3	1.72319
2015-05-21	67.702	4	1.8004
2015-05-22	67.645	5	-0.084228
2015-05-25	67.645	1	0
2015-05-26	66.22	2	-2.12909
2015-05-27	65.537	3	-1.03677
2015-05-28	67.787	4	3.37556
2015-05-29	66.363	5	-2.12308
2015-06-01	67.588	1	1.82908
2015-06-02	64.084	2	-5.32357
2015-06-03	64.284	3	0.311604
2015-06-04	66.192	4	2.92488
2015-06-05	67.872	5	2.5064
2015-06-08	71.119	1	4.6731
2015-06-09	70.664	2	-0.641828
2015-06-10	70.778	3	0.161197
2015-06-11	71.091	4	0.441253
2015-06-12	70.009	5	-1.53369
2015-06-15	69.496	1	-0.735461
2015-06-16	68.983	2	-0.74091
2015-06-17	69.097	3	0.165122
2015-06-18	67.872	4	-1.78877
2015-06-19	69.382	5	2.20039
2015-06-22	70.066	1	0.981019
2015-06-23	70.293	2	0.323457
2015-06-24	70.151	3	-0.202216
2015-06-25	70.122	4	-0.0413479
2015-06-26	69.895	5	-0.324247
2015-06-29	68.898	1	-1.4367
2015-06-30	67.559	2	-1.96259
2015-07-01	66.501	3	-1.57843
2015-07-02	67.405	4	1.35022
2015-07-03	67.405	5	0
2015-07-06	69.735	1	3.39831
2015-07-07	70.85	2	1.58626
2015-07-08	70.388	3	-0.654217
2015-07-09	68.79	4	-2.29644
2015-07-10	68.245	5	-0.795421
2015-07-13	67.827	1	-0.614383
2015-07-14	69.644	2	2.64362
2015-07-15	70.255	3	0.873493
2015-07-16	68.814	4	-2.07243
2015-07-17	68.943	5	0.187286
2015-07-20	68.353	1	-0.859462
2015-07-21	69.809	2	2.10775
2015-07-22	71.176	3	1.93927
2015-07-23	70.749	4	-0.601728
2015-07-24	70.35	5	-0.565562
2015-07-27	70.293	1	-0.0810563
2015-07-28	70.521	2	0.323832
2015-07-29	70.55	3	0.041114
2015-07-30	70.692	4	0.201073
2015-07-31	71.062	5	0.522032
2015-08-03	73.626	1	3.54455
2015-08-04	75.534	2	2.55847
2015-08-05	75.506	3	-0.0370763
2015-08-06	75.335	4	-0.226729
2015-08-07	75.876	5	0.715559
2015-08-10	72.515	1	-4.5307
2015-08-11	75.135	2	3.54931
2015-08-12	75.534	3	0.529639
2015-08-13	74.822	4	-0.947093
2015-08-14	75.449	5	0.834497
2015-08-17	75.107	1	-0.454317
2015-08-18	74.338	2	-1.02915
2015-08-19	74.281	3	-0.0767062
2015-08-20	73.312	4	-1.31309
2015-08-21	72.971	5	-0.46622
2015-08-24	68.727	1	-5.992
2015-08-25	67.331	2	-2.05214
2015-08-26	69.553	3	3.24683
2015-08-27	71.974	4	3.42159
2015-08-28	74.024	5	2.80844
2015-08-31	73.512	1	-0.694071
2015-09-01	73.732	2	0.298824
2015-09-02	73.753	3	0.0284775
2015-09-03	73.273	4	-0.652948
2015-09-04	73.44	5	0.227655
2015-09-07	73.44	1	0
2015-09-08	73.44	2	0
2015-09-09	70.92	3	-3.49163
2015-09-10	70.485	4	-0.615256
2015-09-11	70.713	5	0.322951
2015-09-14	70.487	1	-0.320114
2015-09-15	69.838	2	-0.925002
2015-09-16	70.111	3	0.390143
2015-09-17	69.126	4	-1.41488
2015-09-18	68.767	5	-0.520695
2015-09-21	68.641	1	-0.183395
2015-09-22	66.562	2	-3.07562
2015-09-23	63.942	3	-4.01574
2015-09-24	63.372	4	-0.89543
2015-09-25	62.119	5	-1.99702
2015-09-28	61.521	1	-0.967332
2015-09-29	61.464	2	-0.0926942
2015-09-30	61.037	3	-0.69714
2015-10-01	60.894	4	-0.234559
2015-10-02	60.866	5	-0.0459921
2015-10-05	61.293	1	0.699092
2015-10-06	62.119	2	1.33863
2015-10-07	62.489	3	0.593864
2015-10-08	63.686	4	1.89742
2015-10-09	66.477	5	4.28913
2015-10-12	67.388	1	1.36109
2015-10-13	69.524	2	3.12051
2015-10-14	72.629	3	4.36923
2015-10-15	74.48	4	2.51663
2015-10-16	75.449	5	1.29263
2015-10-19	76.787	1	1.75784
2015-10-20	75.135	2	-2.17489
2015-10-21	76.36	3	1.61725
2015-10-22	76.844	4	0.631839
2015-10-23	76.246	5	-0.781244
2015-10-26	76.246	1	0
2015-10-27	76.559	2	0.409673
2015-10-28	76.502	3	-0.0744801
2015-10-29	75.506	4	-1.31048
2015-10-30	76.189	5	0.900497
2015-11-02	75.663	1	-0.692783
2015-11-03	76.668	2	1.31951
2015-11-04	76.685	3	0.0221711
2015-11-05	76.675	4	-0.0130412
2015-11-06	77.945	5	1.64277
2015-11-09	78.975	1	1.31279
2015-11-10	84.346	2	6.5796
2015-11-11	86.735	3	2.79301
2015-11-12	87.16	4	0.488802
2015-11-13	85.664	5	-1.73128
2015-11-16	86.089	1	0.494898
2015-11-17	82.877	2	-3.80241
2015-11-18	85.66	3	3.30284
2015-11-19	85.007	4	-0.765237
2015-11-20	84.534	5	-0.557979
2015-11-23	83.452	1	-1.28822
2015-11-24	82.768	2	-0.82301
2015-11-25	81.829	3	-1.14098
2015-11-26	81.829	4	0
2015-11-27	81.515	5	-0.384465
2015-11-30	80.746	1	-0.947863
2015-12-01	79.977	2	-0.956933
2015-12-02	80.063	3	0.107473
2015-12-03	80.148	4	0.10611
2015-12-04	79.749	5	-0.499072
2015-12-07	81.43	1	2.08596
2015-12-08	80.946	2	-0.596149
2015-12-09	86.186	3	6.27255
2015-12-10	84.506	4	-1.96852
2015-12-11	85.503	5	1.17289
2015-12-14	85.104	1	-0.467743
2015-12-15	83.566	2	-1.82373
2015-12-16	84.221	3	0.780756
2015-12-17	82.199	4	-2.43012
2015-12-18	81.914	5	-0.347322
2015-12-21	81.686	1	-0.278729
2015-12-22	82.911	2	1.48851
2015-12-23	83.993	3	1.29657
2015-12-24	83.737	4	-0.305253
2015-12-25	83.737	5	0
2015-12-28	85.417	1	1.98642
2015-12-29	86.044	2	0.731365
2015-12-30	81.658	3	-5.2319
2015-12-31	82.398	4	0.902137
2016-01-01	82.398	5	0
2016-01-04	83.011	1	0.741196
2016-01-05	81.208	2	-2.19594
2016-01-06	83.008	3	2.19232
2016-01-07	79.848	4	-3.88122
2016-01-08	77.053	5	-3.56313
2016-01-11	75.796	1	-1.6448
2016-01-12	75.299	2	-0.657867
2016-01-13	74.943	3	-0.473903
2016-01-14	74.435	4	-0.680156
2016-01-15	72.819	5	-2.19494
2016-01-18	72.819	1	0
2016-01-19	71.588	2	-1.70494
2016-01-20	68.818	3	-3.94621
2016-01-21	69.126	4	0.446559
2016-01-22	69.126	5	0
2016-01-25	70.692	1	2.24015
2016-01-26	70.692	2	0
2016-01-27	70.977	3	0.402347
2016-01-28	75.99	4	6.82459
2016-01-29	75.99	5	0
2016-02-01	76.73	1	0.969101
2016-02-02	77.841	2	1.43755
2016-02-03	77.471	3	-0.476461
2016-02-04	77.955	4	0.622806
2016-02-05	77.101	5	-1.10155
2016-02-08	76.075	1	-1.33966
2016-02-09	75.42	2	-0.86472
2016-02-10	75.078	3	-0.454492
2016-02-11	74.338	4	-0.990531
2016-02-12	73.968	5	-0.498969
2016-02-15	73.968	1	0
2016-02-16	77.499	2	4.66325
2016-02-17	74.794	3	-3.55274
2016-02-18	74.224	4	-0.765012
2016-02-19	74.423	5	0.267749
2016-02-22	71.66	1	-3.78323
2016-02-23	72.145	2	0.674527
2016-02-24	71.49	3	-0.91204
2016-02-25	74.281	4	3.82976
2016-02-26	73.199	5	-1.46734
2016-02-29	72.116	1	-1.49058
2016-03-01	71.585	2	-0.739038
2016-03-02	71.56	3	-0.0349296
2016-03-03	70.675	4	-1.24444
2016-03-04	68.771	5	-2.73098
2016-03-07	67.388	1	-2.03152
2016-03-08	69.809	2	3.5296
2016-03-09	70.525	3	1.02043
2016-03-10	69.661	4	-1.23266
2016-03-11	69.325	5	-0.483503
2016-03-14	72.657	1	4.69441
2016-03-15	73.318	2	0.905641
2016-03-16	72.897	3	-0.575866
2016-03-17	72.805	4	-0.126285
2016-03-18	72.904	5	0.135887
2016-03-21	72.914	1	0.0137157
2016-03-22	76.218	2	4.4317
2016-03-23	77.243	3	1.33586
2016-03-24	77.3	4	0.0737659
2016-03-25	77.3	5	0
2016-03-28	76.844	1	-0.591656
2016-03-29	77.813	2	1.25311
2016-03-30	80.604	3	3.52398
2016-03-31	83.594	4	3.64235
2016-04-01	83.908	5	0.374921
2016-04-04	82.17	1	-2.09307
2016-04-05	81.601	2	-0.694876
2016-04-06	82.512	3	1.11022
2016-04-07	81.885	4	-0.762791
2016-04-08	78.923	5	-3.68431
2016-04-11	78.411	1	-0.650847
2016-04-12	77.756	2	-0.838851
2016-04-13	77.756	3	0
2016-04-14	80.461	4	3.41969
2016-04-15	78.639	5	-2.29048
2016-04-18	79.635	1	1.25859
2016-04-19	78.24	2	-1.76727
2016-04-20	76.047	3	-2.84295
2016-04-21	73.341	4	-3.62318
2016-04-22	73.312	5	-0.0395491
2016-04-25	73.142	1	-0.232155
2016-04-26	72.344	2	-1.09702
2016-04-27	72.259	3	-0.117563
2016-04-28	71.689	4	-0.791957
2016-04-29	73.17	5	2.04482
2016-05-02	77.843	1	6.19085
2016-05-03	76.62	2	-1.58358
2016-05-04	78.787	3	2.78899
2016-05-05	77.983	4	-1.02572
2016-05-06	80.053	5	2.61981
2016-05-09	80.347	1	0.366584
2016-05-10	81.506	2	1.43219
2016-05-11	82.85	3	1.63551
2016-05-12	83.623	4	0.928686
2016-05-13	82.854	5	-0.923858
2016-05-16	81.806	1	-1.27294
2016-05-17	83.344	2	1.8626
2016-05-18	83.086	3	-0.310041
2016-05-19	84.462	4	1.64255
2016-05-20	85.303	5	0.990789
2016-05-23	84.05	1	-1.47978
2016-05-24	82.882	2	-1.3994
2016-05-25	84.164	3	1.53494
2016-05-26	84.306	4	0.168576
2016-05-27	83.452	5	-1.01814
2016-05-30	83.452	1	0
2016-05-31	86.784	2	3.91507
2016-06-01	87.838	3	1.20719
2016-06-02	89.49	4	1.86327
2016-06-03	90.43	5	1.04492
2016-06-06	95.158	1	5.09626
2016-06-07	95.414	2	0.268665
2016-06-08	93.478	3	-2.04992
2016-06-09	94.987	4	1.60139
2016-06-10	95.671	5	0.717518
2016-06-13	95.642	1	-0.0303168
2016-06-14	93.705	2	-2.04605
2016-06-15	92.993	3	-0.762733
2016-06-16	95.073	4	2.21208
2016-06-17	95.443	5	0.388419
2016-06-20	95.557	1	0.119372
2016-06-21	95.357	2	-0.209518
2016-06-22	95.471	3	0.119479
2016-06-23	97.721	4	2.32939
2016-06-24	96.839	5	-0.906667
2016-06-27	95.984	1	-0.886829
2016-06-28	96.839	2	0.886829
2016-06-29	96.839	3	0
2016-06-30	100.94	4	4.14765
2016-07-01	101.534	5	0.586744
2016-07-04	101.534	1	0
2016-07-05	104.362	2	2.74719
2016-07-06	104.147	3	-0.206226
2016-07-07	105.592	4	1.37792
2016-07-08	106.541	5	0.894728
2016-07-11	101.316	1	-5.02855
2016-07-12	100.632	2	-0.677405
2016-07-13	102.858	3	2.18791
2016-07-14	104.603	4	1.68228
2016-07-15	104.367	5	-0.22587
2016-07-18	104.777	1	0.392075
2016-07-19	103.748	2	-0.98694
2016-07-20	103.376	3	-0.359206
2016-07-21	102.482	4	-0.868565
2016-07-22	102.877	5	0.384693
2016-07-25	106.209	1	3.18748
2016-07-26	109.684	2	3.21947
2016-07-27	108.117	3	-1.43895
2016-07-28	102.421	4	-5.41222
2016-07-29	99.687	5	-2.70565
2016-08-01	103.19	1	3.45367
2016-08-02	97.608	2	-5.56125
2016-08-03	98.718	3	1.13078
2016-08-04	99.829	4	1.11914
2016-08-05	104.728	5	4.79078
2016-08-08	101.253	1	-3.37442
2016-08-09	105.298	2	3.91721
2016-08-10	104.044	3	-1.19805
2016-08-11	105.525	4	1.4134
2016-08-12	104.044	5	-1.4134
2016-08-15	103.987	1	-0.0547995
2016-08-16	102.279	2	-1.65615
2016-08-17	100.541	3	-1.71388
2016-08-18	101.082	4	0.536646
2016-08-19	102.649	5	1.53833
2016-08-22	101.937	1	-0.696043
2016-08-23	106.294	2	4.18539
2016-08-24	106.921	3	0.58814
2016-08-25	105.525	4	-1.31424
2016-08-26	105.753	5	0.215829
2016-08-29	107.719	1	1.84198
2016-08-30	107.747	2	0.0259902
2016-08-31	104.87	3	-2.70644
2016-09-01	109.76	4	4.55747
2016-09-02	106.148	5	-3.34618
2016-09-05	106.148	1	0
2016-09-06	109.097	2	2.7403
2016-09-07	108.683	3	-0.380201
2016-09-08	111.155	4	2.24902
2016-09-09	111.928	5	0.693018
2016-09-12	109.097	1	-2.56184
2016-09-13	111.558	2	2.23072
2016-09-14	110.629	3	-0.836237
2016-09-15	110.092	4	-0.486588
2016-09-16	111.108	5	0.918632
2016-09-19	112.139	1	0.923647
2016-09-20	114.83	2	2.37136
2016-09-21	111.943	3	-2.5463
2016-09-22	114.298	4	2.08193
2016-09-23	113.443	5	-0.750856
2016-09-26	114.184	1	0.651067
2016-09-27	115.58	2	1.21517
2016-09-28	115.38	3	-0.17319
2016-09-29	114.355	4	-0.892338
2016-09-30	115.722	5	1.18831
2016-10-03	111.136	1	-4.04361
2016-10-04	113.871	2	2.43116
2016-10-05	113.273	3	-0.526539
2016-10-06	112.561	4	-0.630554
2016-10-07	111.564	5	-0.889688
2016-10-10	113.728	1	1.92112
2016-10-11	112.931	2	-0.703262
2016-10-12	112.304	3	-0.556753
2016-10-13	108.317	4	-3.61474
2016-10-14	106.836	5	-1.37672
2016-10-17	107.348	1	0.478095
2016-10-18	108.06	2	0.661073
2016-10-19	111.136	3	2.8068
2016-10-20	110.709	4	-0.384954
2016-10-21	113.159	5	2.18888
2016-10-24	116.833	1	3.19517
2016-10-25	117.289	2	0.389541
2016-10-26	118.257	3	0.821925
2016-10-27	120.621	4	1.97932
2016-10-28	121.418	5	0.658574
2016-10-31	121.703	1	0.234451
2016-11-01	127.4	2	4.57481
2016-11-02	128.224	3	0.644699
2016-11-03	123.258	4	-3.9499
2016-11-04	124.128	5	0.703357
2016-11-07	125.624	1	1.198
2016-11-08	121.965	2	-2.95592
2016-11-09	122.092	3	0.104074
2016-11-10	122.482	4	0.318922
2016-11-11	119.778	5	-2.23241
2016-11-14	116.472	1	-2.79891
2016-11-15	117.56	2	0.929794
2016-11-16	117.431	3	-0.109791
2016-11-17	118.819	4	1.17504
2016-11-18	119.233	5	0.347824
2016-11-21	119.425	1	0.1609
2016-11-22	118.456	2	-0.814698
2016-11-23	119.368	3	0.766957
2016-11-24	119.368	4	0
2016-11-25	121.134	5	1.46862
2016-11-28	120.279	1	-0.708333
2016-11-29	120.82	2	0.448779
2016-11-30	122.159	3	1.10216
2016-12-01	124.722	4	2.07638
2016-12-02	123.953	5	-0.61848
2016-12-05	123.697	1	-0.206743
2016-12-06	122.13	2	-1.2749
2016-12-07	120.279	3	-1.5272
2016-12-08	119.681	4	-0.498417
2016-12-09	119.539	5	-0.118719
2016-12-12	114.697	1	-4.13488
2016-12-13	113.614	2	-0.948713
2016-12-14	113.443	3	-0.150623
2016-12-15	110.083	4	-3.00659
2016-12-16	109.57	5	-0.467101
2016-12-19	111.82	1	2.03268
2016-12-20	113.102	2	1.13996
2016-12-21	110.994	3	-1.88139
2016-12-22	109.342	4	-1.49956
2016-12-23	109.342	5	0
2016-12-26	109.342	1	0
2016-12-27	107.833	2	-1.38969
2016-12-28	106.779	3	-0.982246
2016-12-29	108.516	4	1.61363
2016-12-30	110.424	5	1.74299
2017-01-02	110.424	1	0
2017-01-03	110.686	2	0.236986
2017-01-04	110.299	3	-0.35025
2017-01-05	108.129	4	-1.98699
2017-01-06	103.887	5	-4.00212
2017-01-09	101.709	1	-2.1188
2017-01-10	103.48	2	1.72626
2017-01-11	103.959	3	0.461823
2017-01-12	104.217	4	0.247867
2017-01-13	103.372	5	-0.814113
2017-01-16	103.372	1	0
2017-01-17	98.016	2	-5.32034
2017-01-18	95.819	3	-2.26697
2017-01-19	94.89	4	-0.974267
2017-01-20	93.937	5	-1.0094
2017-01-23	91.74	1	-2.36659
2017-01-24	92.88	2	1.23498
2017-01-25	93.25	3	0.397572
2017-01-26	92.054	4	-1.29087
2017-01-27	96.782	5	5.00857
2017-01-30	99.003	1	2.26891
2017-01-31	96.582	2	-2.47578
2017-02-01	95.614	3	-1.00731
2017-02-02	92.908	4	-2.87095
2017-02-03	93.136	5	0.245103
2017-02-06	92.281	1	-0.922252
2017-02-07	94.304	2	2.16853
2017-02-08	95.785	3	1.55825
2017-02-09	96.126	4	0.355373
2017-02-10	94.873	5	-1.31207
2017-02-13	93.876	1	-1.05644
2017-02-14	94.475	2	0.636049
2017-02-15	96.924	3	2.55919
2017-02-16	97.038	4	0.117549
2017-02-17	97.835	5	0.817973
2017-02-20	97.835	1	0
2017-02-21	96.468	2	-1.4071
2017-02-22	95.386	3	-1.12795
2017-02-23	95.785	4	0.417428
2017-02-24	94.019	5	-1.86092
2017-02-27	89.633	1	-4.77733
2017-02-28	92.281	2	2.91147
2017-03-01	91.765	3	-0.560731
2017-03-02	93.193	4	1.54417
2017-03-03	95.409	5	2.35003
2017-03-06	98.325	1	3.01054
2017-03-07	99.146	2	0.831519
2017-03-08	98.445	3	-0.709549
2017-03-09	96.385	4	-2.11474
2017-03-10	96.548	5	0.168971
2017-03-13	96.793	1	0.253438
2017-03-14	97.731	2	0.964413
2017-03-15	99.03	3	1.3204
2017-03-16	98.285	4	-0.755141
2017-03-17	99.275	5	1.00224
2017-03-20	100.011	1	0.73864
2017-03-21	102.022	2	1.99083
2017-03-22	101.709	3	-0.307268
2017-03-23	100.484	4	-1.21173
2017-03-24	98.263	5	-2.2351
2017-03-27	95.842	1	-2.49466
2017-03-28	93.819	2	-2.13336
2017-03-29	92.993	3	-0.884317
2017-03-30	89.319	4	-4.031
2017-03-31	87.183	5	-2.42049
2017-04-03	85.389	1	-2.07921
2017-04-04	85.56	2	0.20006
2017-04-05	87.81	3	2.59575
2017-04-06	88.664	4	0.967856
2017-04-07	91.256	5	2.88148
2017-04-10	91.028	1	-0.250159
2017-04-11	88.18	2	-3.1787
2017-04-12	87.981	3	-0.22593
2017-04-13	88.721	4	0.837573
2017-04-14	88.721	5	0
2017-04-17	87.326	1	-1.58484
2017-04-18	88.095	2	0.876754
2017-04-19	89.205	3	1.25213
2017-04-20	86.67	4	-2.88293
2017-04-21	86.813	5	0.164858
2017-04-24	88.152	1	1.53062
2017-04-25	89.462	2	1.47514
2017-04-26	91	3	1.70456
2017-04-27	88.835	4	-2.40788
2017-04-28	90.202	5	1.52709
2017-05-01	88.689	1	-1.69157
2017-05-02	87.696	2	-1.12596
2017-05-03	85.024	3	-3.09427
2017-05-04	82.892	4	-2.5395
2017-05-05	83.101	5	0.251818
2017-05-08	84.346	1	1.48707
2017-05-09	84.069	2	-0.32895
2017-05-10	81.479	3	-3.12926
2017-05-11	82.153	4	0.823804
2017-05-12	83.405	5	1.51249
2017-05-15	81.627	1	-2.15482
2017-05-16	80.951	2	-0.831606
2017-05-17	80.116	3	-1.03684
2017-05-18	79.871	4	-0.306275
2017-05-19	78.866	5	-1.26626
2017-05-22	76.93	1	-2.48543
2017-05-23	76.417	2	-0.669073
2017-05-24	76.502	3	0.11117
2017-05-25	76.588	4	0.112352
2017-05-26	78.268	5	2.16984
2017-05-29	78.268	1	0
2017-05-30	77.158	2	-1.42836
2017-05-31	75.619	3	-2.01477
2017-06-01	74.822	4	-1.05956
2017-06-02	75.392	5	0.758921
2017-06-05	77.044	1	2.16755
2017-06-06	75.306	2	-2.28169
2017-06-07	74.879	3	-0.568634
2017-06-08	77.699	4	3.69689
2017-06-09	78.838	5	1.45527
2017-06-12	78.012	1	-1.05325
2017-06-13	79.436	2	1.8089
2017-06-14	78.639	3	-1.00839
2017-06-15	79.607	4	1.22343
2017-06-16	78.752	5	-1.07984
2017-06-19	76.844	1	-2.45263
2017-06-20	75.79	2	-1.3811
2017-06-21	73.968	3	-2.43338
2017-06-22	72.885	4	-1.47497
2017-06-23	75.335	5	3.3062
2017-06-26	79.635	1	5.55089
2017-06-27	80.461	2	1.03189
2017-06-28	78.838	3	-2.03775
2017-06-29	76.275	4	-3.30499
2017-06-30	75.506	5	-1.01331
2017-07-03	76.134	1	0.828282
2017-07-04	76.134	2	0
2017-07-05	79.307	3	4.08315
2017-07-06	77.835	4	-1.87352
2017-07-07	76.204	5	-2.11772
2017-07-10	76.854	1	0.849356
2017-07-11	74.258	2	-3.4362
2017-07-12	73.609	3	-0.877822
2017-07-13	73.774	4	0.223907
2017-07-14	72.68	5	-1.49401
2017-07-17	72.553	1	-0.174891
2017-07-18	72.633	2	0.110203
2017-07-19	71.991	3	-0.887825
2017-07-20	72.204	4	0.295433
2017-07-21	74.547	5	3.19344
2017-07-24	76.332	1	2.36624
2017-07-25	75.335	2	-1.31474
2017-07-26	76.275	3	1.24004
2017-07-27	78.496	4	2.87024
2017-07-28	78.211	5	-0.363737
2017-07-31	75.676	1	-3.29492
2017-08-01	76.132	2	0.600761
2017-08-02	77.357	3	1.59624
2017-08-03	76.816	4	-0.701812
2017-08-04	77.585	5	0.996116
2017-08-07	76.645	1	-1.21897
2017-08-08	74.936	2	-2.255
2017-08-09	75.42	3	0.643808
2017-08-10	76.161	4	0.977703
2017-08-11	76.702	5	0.707826
2017-08-14	76.161	1	-0.707826
2017-08-15	77.3	2	1.48444
2017-08-16	77.699	3	0.514843
2017-08-17	79.408	4	2.17567
2017-08-18	77.699	5	-2.17567
2017-08-21	77.471	1	-0.293871
2017-08-22	74.737	2	-3.59284
2017-08-23	74.737	3	0
2017-08-24	76.132	4	1.84934
2017-08-25	77.158	5	1.33866
2017-08-28	75.904	1	-1.63859
2017-08-29	74.708	2	-1.58822
2017-08-30	74.081	3	-0.842809
2017-08-31	76.218	4	2.84386
2017-09-01	77.756	5	1.99781
2017-09-04	77.756	1	0
2017-09-05	82.48	2	5.89801
2017-09-06	80.051	3	-2.98919
2017-09-07	83.07	4	3.70197
2017-09-08	87.202	5	4.85436
2017-09-11	85.656	1	-1.7888
2017-09-12	88.721	2	3.51573
2017-09-13	88.178	3	-0.613912
2017-09-14	85.338	4	-3.27377
2017-09-15	84.791	5	-0.643044
2017-09-18	85.86	1	1.25287
2017-09-19	86.215	2	0.412611
2017-09-20	87.531	3	1.51488
2017-09-21	86.222	4	-1.50677
2017-09-22	83.395	5	-3.3337
2017-09-25	82.598	1	-0.960289
2017-09-26	83.822	2	1.471
2017-09-27	85.275	3	1.71858
2017-09-28	83.737	4	-1.82004
2017-09-29	84.534	5	0.947289
2017-10-02	87.155	1	3.05343
2017-10-03	88.237	2	1.23382
2017-10-04	89.803	3	1.7592
2017-10-05	90.288	4	0.538618
2017-10-06	89.348	5	-1.04657
2017-10-09	89.974	1	0.698188
2017-10-10	91.455	2	1.63263
2017-10-11	91.968	3	0.559364
2017-10-12	90.402	4	-1.71743
2017-10-13	86.329	5	-4.61008
2017-10-16	86.784	1	0.525669
2017-10-17	87.012	2	0.262377
2017-10-18	85.588	3	-1.6501
2017-10-19	86.585	4	1.15815
2017-10-20	88.408	5	2.08359
2017-10-23	87.126	1	-1.46071
2017-10-24	86.129	2	-1.15092
2017-10-25	86.984	3	0.987802
2017-10-26	87.496	4	0.586888
2017-10-27	87.639	5	0.163303
2017-10-30	88.095	1	0.518967
2017-10-31	88.009	2	-0.0976696
2017-11-01	86.6	3	-1.61393
2017-11-02	88.207	4	1.83865
2017-11-03	89.12	5	1.02975
2017-11-06	90.872	1	1.94681
2017-11-07	91	2	0.140758
2017-11-08	91.205	3	0.225021
2017-11-09	91.374	4	0.185125
2017-11-10	91.864	5	0.534825
2017-11-13	90.8	1	-1.16499
2017-11-14	91.427	2	0.688155
2017-11-15	92.224	3	0.867956
2017-11-16	93.66	4	1.54508
2017-11-17	93.93	5	0.287862
2017-11-20	93.998	1	0.0723681
2017-11-21	93.962	2	-0.038306
2017-11-22	93.876	3	-0.0915683
2017-11-23	93.876	4	0
2017-11-24	93.392	5	-0.516907
2017-11-27	93.962	1	0.608476
2017-11-28	93.079	2	-0.944185
2017-11-29	93.221	3	0.152442
2017-11-30	91.256	4	-2.13043
2017-12-01	92.623	5	1.48687
2017-12-04	92.196	1	-0.462075
2017-12-05	92.31	2	0.123573
2017-12-06	89.974	3	-2.56317
2017-12-07	87.639	4	-2.62946
2017-12-08	87.297	5	-0.391001
2017-12-11	86.329	1	-1.11505
2017-12-12	85.588	2	-0.862049
2017-12-13	85.075	3	-0.601187
2017-12-14	83.48	4	-1.89261
2017-12-15	82.313	5	-1.4078
2017-12-18	80.291	1	-2.48715
2017-12-19	79.778	2	-0.640976
2017-12-20	78.809	3	-1.22206
2017-12-21	77.727	4	-1.38245
2017-12-22	77.414	5	-0.403504
2017-12-25	77.414	1	0
2017-12-26	76.246	2	-1.52027
2017-12-27	75.392	3	-1.12638
2017-12-28	77.385	4	2.60918
2017-12-29	77.955	5	0.733877
2018-01-01	77.955	1	0
2018-01-02	77.816	2	-0.178467
2018-01-03	79.39	3	2.00254
2018-01-04	79.089	4	-0.379862
2018-01-05	78.64	5	-0.569332
2018-01-08	79.066	1	0.540247
2018-01-09	77.795	2	-1.62058
2018-01-10	78.023	3	0.292649
2018-01-11	77.877	4	-0.1873
2018-01-12	77.841	5	-0.0462374
2018-01-15	77.841	1	0
2018-01-16	79.996	2	2.73083
2018-01-17	79.687	3	-0.387017
2018-01-18	82.512	4	3.48373
2018-01-19	83.477	5	1.16274
2018-01-22	84.536	1	1.26063
2018-01-23	84.591	2	0.0650399
2018-01-24	84.506	3	-0.100534
2018-01-25	85.332	4	0.972699
2018-01-26	85.36	5	0.0328076
2018-01-29	86.585	1	1.4249
2018-01-30	84.848	2	-2.02652
2018-01-31	85.275	3	0.501991
2018-02-01	85.303	4	0.0328296
2018-02-02	84.363	5	-1.10807
2018-02-05	82.512	1	-2.21852
2018-02-06	83.822	2	1.57518
2018-02-07	83.367	3	-0.544296
2018-02-08	84.136	4	0.918199
2018-02-09	84.306	5	0.20185
2018-02-12	84.762	1	0.539429
2018-02-13	83.993	2	-0.911387
2018-02-14	84.193	3	0.237832
2018-02-15	84.079	4	-0.135495
2018-02-16	85.389	5	1.54605
2018-02-19	85.389	1	0
2018-02-20	83.31	2	-2.46487
2018-02-21	80.917	3	-2.91447
2018-02-22	82.199	4	1.57192
2018-02-23	82.768	5	0.689838
2018-02-26	82.313	1	-0.551246
2018-02-27	82.028	2	-0.34684
2018-02-28	82.398	3	0.450051
2018-03-01	80.442	4	-2.40247
2018-03-02	79.009	5	-1.79747
2018-03-05	79.983	1	1.22523
2018-03-06	81.145	2	1.44236
2018-03-07	80.746	3	-0.492925
2018-03-08	79.282	4	-1.82973
2018-03-09	79.962	5	0.854041
2018-03-12	79.142	1	-1.03078
2018-03-13	78.815	2	-0.414037
2018-03-14	79.408	3	0.749578
2018-03-15	79.149	4	-0.326697
2018-03-16	78.895	5	-0.32143
2018-03-19	78.733	1	-0.205547
2018-03-20	78.508	2	-0.286185
2018-03-21	78.439	3	-0.0879278
2018-03-22	77.927	4	-0.654876
2018-03-23	77.528	5	-0.513333
2018-03-26	78.838	1	1.6756
2018-03-27	78.61	2	-0.28962
2018-03-28	80.433	3	2.29256
2018-03-29	80.632	4	0.247105
2018-03-30	80.632	5	0
2018-04-02	79.806	1	-1.02969
2018-04-03	79.379	2	-0.536484
2018-04-04	79.578	3	0.250382
2018-04-05	79.037	4	-0.682158
2018-04-06	78.866	5	-0.216589
2018-04-09	79.265	1	0.504646
2018-04-10	79.18	2	-0.107293
2018-04-11	79.692	3	0.644546
2018-04-12	79.949	4	0.321973
2018-04-13	80.376	5	0.532669
2018-04-16	81.629	1	1.5469
2018-04-17	82.968	2	1.62704
2018-04-18	82.398	3	-0.689383
2018-04-19	81.316	4	-1.32184
2018-04-20	81.487	5	0.21007
2018-04-23	83.139	1	2.00704
2018-04-24	84.306	2	1.39391
2018-04-25	84.791	3	0.573637
2018-04-26	87.639	4	3.30367
2018-04-27	87.639	5	0
2018-04-30	88.693	1	1.19549
2018-05-01	90.007	2	1.47065
2018-05-02	91.292	3	1.41757
2018-05-03	90.635	4	-0.722271
2018-05-04	92.224	5	1.73799
2018-05-07	93.772	1	1.66459
2018-05-08	91.974	2	-1.93604
2018-05-09	94.943	3	3.17708
2018-05-10	95.701	4	0.795204
2018-05-11	96.502	5	0.833499
2018-05-14	97.57	1	1.10063
2018-05-15	96.74	2	-0.85431
2018-05-16	96.776	3	0.0372062
2018-05-17	96.835	4	0.060947
2018-05-18	94.647	5	-2.28543
2018-05-21	95.414	1	0.807114
2018-05-22	96.098	2	0.714319
2018-05-23	96.297	3	0.206866
2018-05-24	95.956	4	-0.354741
2018-05-25	96.354	5	0.413916
2018-05-28	96.354	1	0
2018-05-29	96.839	2	0.50209
2018-05-30	92.908	3	-4.144
2018-05-31	92.424	4	-0.522307
2018-06-01	94.446	5	2.16416
2018-06-04	94.56	1	0.120631
2018-06-05	94.617	2	0.060261
2018-06-06	95.272	3	0.689879
2018-06-07	94.731	4	-0.569466
2018-06-08	91.598	5	-3.36319
2018-06-11	90.43	1	-1.28334
2018-06-12	89.006	2	-1.58723
2018-06-13	88.607	3	-0.449292
2018-06-14	90.145	4	1.72086
2018-06-15	92.082	5	2.126
2018-06-18	91.455	1	-0.683244
2018-06-19	90.772	2	-0.749618
2018-06-20	90.686	3	-0.0947878
2018-06-21	90.202	4	-0.535139
2018-06-22	93.193	5	3.2621
2018-06-25	91.541	1	-1.78857
2018-06-26	90.743	2	-0.875562
2018-06-27	91.341	3	0.656842
2018-06-28	91.398	4	0.0623841
2018-06-29	91.341	5	-0.0623841
2018-07-02	95.063	1	3.99401
2018-07-03	95.509	2	0.468065
2018-07-04	95.509	3	0
2018-07-05	96.314	4	0.83932
2018-07-06	96.104	5	-0.218275
2018-07-09	96.326	1	0.230733
2018-07-10	95.044	2	-1.33983
2018-07-11	95.101	3	0.0599542
2018-07-12	95.441	4	0.356877
2018-07-13	96.121	5	0.709956
2018-07-16	97.171	1	1.08645
2018-07-17	97.537	2	0.375948
2018-07-18	96.633	3	-0.93115
2018-07-19	96.983	4	0.361541
2018-07-20	97.539	5	0.571659
2018-07-23	96.041	1	-1.54771
2018-07-24	93.506	2	-2.67496
2018-07-25	94.446	3	1.00026
2018-07-26	93.99	4	-0.483985
2018-07-27	93.99	5	0
2018-07-30	96.81	1	2.95619
2018-07-31	95.956	2	-0.886054
2018-08-01	96.725	3	0.798215
2018-08-02	95.956	4	-0.798215
2018-08-03	96.725	5	0.798215
2018-08-06	95.443	1	-1.33427
2018-08-07	94.446	2	-1.0501
2018-08-08	94.418	3	-0.029651
2018-08-09	94.531	4	0.119609
2018-08-10	93.05	5	-1.57908
2018-08-13	91.057	1	-2.16513
2018-08-14	89.519	2	-1.70348
2018-08-15	89.262	3	-0.287503
2018-08-16	88.636	4	-0.703777
2018-08-17	89.633	5	1.11855
2018-08-20	88.921	1	-0.797522
2018-08-21	88.379	2	-0.611395
2018-08-22	88.55	3	0.193298
2018-08-23	89.006	4	0.513642
2018-08-24	89.12	5	0.127999
2018-08-27	89.291	1	0.191692
2018-08-28	87.383	2	-2.15999
2018-08-29	87.183	3	-0.22914
2018-08-30	88.237	4	1.2017
[truncated: 931 more rows]

## Sheet: Soybean meal
2010-12-31	418
2011-01-03	419	1	0.238949
2011-01-04	418	2	-0.238949
2011-01-05	418	3	0
2011-01-06	423	4	1.18907
2011-01-07	411	5	-2.8779
2011-01-10	416	1	1.2092
2011-01-11	411	2	-1.2092
2011-01-12	411	3	0
2011-01-13	426	4	3.58461
2011-01-14	435	5	2.09067
2011-01-17	435	1	0
2011-01-18	435	2	0
2011-01-19	428	3	-1.62228
2011-01-20	430	4	0.466201
2011-01-21	430	5	0
2011-01-24	429	1	-0.232829
2011-01-25	423	2	-1.40847
2011-01-26	418	3	-1.18907
2011-01-27	420	4	0.477328
2011-01-28	421	5	0.237812
2011-01-31	421	1	0
2011-02-01	421	2	0
2011-02-02	421	3	0
2011-02-03	421	4	0
2011-02-04	426	5	1.18065
2011-02-07	426	1	0
2011-02-08	426	2	0
2011-02-09	426	3	0
2011-02-10	426	4	0
2011-02-11	426	5	0
2011-02-14	418	1	-1.89579
2011-02-15	407	2	-2.66682
2011-02-16	403	3	-0.987662
2011-02-17	411	4	1.96567
2011-02-18	398	5	-3.21412
2011-02-21	398	1	0
2011-02-22	384	2	-3.58095
2011-02-23	393	3	2.31671
2011-02-24	393	4	0
2011-02-25	390	5	-0.766287
2011-02-28	399	1	2.28147
2011-03-01	399	2	0
2011-03-02	396	3	-0.754721
2011-03-03	396	4	0
2011-03-04	401	5	1.25472
2011-03-07	401	1	0
2011-03-08	401	2	0
2011-03-09	383	3	-4.59264
2011-03-10	383	4	0
2011-03-11	381	5	-0.523561
2011-03-14	384	1	0.784318
2011-03-15	372	2	-3.17487
2011-03-16	372	3	0
2011-03-17	374	4	0.536194
2011-03-18	398	5	6.21962
2011-03-21	395	1	-0.756624
2011-03-22	395	2	0
2011-03-23	386	3	-2.30484
2011-03-24	386	4	0
2011-03-25	386	5	0
2011-03-28	381	1	-1.3038
2011-03-29	382	2	0.262123
2011-03-30	382	3	0
2011-03-31	386	4	1.04168
2011-04-01	378	5	-2.09432
2011-04-04	378	1	0
2011-04-05	368	2	-2.68113
2011-04-06	369	3	0.271371
2011-04-07	364	4	-1.36428
2011-04-08	370	5	1.63491
2011-04-11	365	1	-1.36057
2011-04-12	358	2	-1.93644
2011-04-13	358	3	0
2011-04-14	363	4	1.38698
2011-04-15	366	5	0.82305
2011-04-18	366	1	0
2011-04-19	365	2	-0.273598
2011-04-20	368	3	0.818558
2011-04-21	368	4	0
2011-04-22	368	5	0
2011-04-25	377	1	2.41622
2011-04-26	379	2	0.529102
2011-04-27	378	3	-0.264201
2011-04-28	367	4	-2.95323
2011-04-29	372	5	1.3532
2011-05-02	381	1	2.39055
2011-05-03	381	2	0
2011-05-04	377	3	-1.05542
2011-05-05	374	4	-0.798939
2011-05-06	368	5	-1.61729
2011-05-09	370	1	0.542007
2011-05-10	370	2	0
2011-05-11	367	3	-0.814116
2011-05-12	373	4	1.62166
2011-05-13	373	5	0
2011-05-16	365	1	-2.16811
2011-05-17	368	2	0.818558
2011-05-18	368	3	0
2011-05-19	377	4	2.41622
2011-05-20	376	5	-0.265604
2011-05-23	376	1	0
2011-05-24	373	2	-0.801072
2011-05-25	373	3	0
2011-05-26	375	4	0.534761
2011-05-27	375	5	0
2011-05-30	368	1	-1.88431
2011-05-31	370	2	0.542007
2011-06-01	374	3	1.07528
2011-06-02	377	4	0.798939
2011-06-03	377	5	0
2011-06-06	371	1	-1.60431
2011-06-07	376	2	1.33871
2011-06-08	380	3	1.05821
2011-06-09	380	4	0
2011-06-10	380	5	0
2011-06-13	376	1	-1.05821
2011-06-14	376	2	0
2011-06-15	365	3	-2.96918
2011-06-16	357	4	-2.21616
2011-06-17	357	5	0
2011-06-20	351	1	-1.69496
2011-06-21	356	2	1.41445
2011-06-22	354	3	-0.563382
2011-06-23	354	4	0
2011-06-24	354	5	0
2011-06-27	353	1	-0.282886
2011-06-28	353	2	0
2011-06-29	352	3	-0.283688
2011-06-30	349	4	-0.855925
2011-07-01	349	5	0
2011-07-04	349	1	0
2011-07-05	349	2	0
2011-07-06	349	3	0
2011-07-07	365	4	4.48254
2011-07-08	365	5	0
2011-07-11	365	1	0
2011-07-12	371	2	1.63047
2011-07-13	373	3	0.537636
2011-07-14	373	4	0
2011-07-15	378	5	1.33158
2011-07-18	377	1	-0.264901
2011-07-19	376	2	-0.265604
2011-07-20	378	3	0.530505
2011-07-21	379	4	0.264201
2011-07-22	384	5	1.31063
2011-07-25	378	1	-1.57484
2011-07-26	383	2	1.31408
2011-07-27	378	3	-1.31408
2011-07-28	378	4	0
2011-07-29	375	5	-0.796817
2011-08-01	373	1	-0.534761
2011-08-02	380	2	1.85928
2011-08-03	379	3	-0.263505
2011-08-04	372	4	-1.86424
2011-08-05	368	5	-1.08109
2011-08-08	368	1	0
2011-08-09	359	2	-2.47605
2011-08-10	361	3	0.555557
2011-08-11	369	4	2.19187
2011-08-12	366	5	-0.816331
2011-08-15	371	1	1.35687
2011-08-16	371	2	0
2011-08-17	376	3	1.33871
2011-08-18	376	4	0
2011-08-19	375	5	-0.266312
2011-08-22	375	1	0
2011-08-23	382	2	1.84946
2011-08-24	382	3	0
2011-08-25	382	4	0
2011-08-26	382	5	0
2011-08-29	393	1	2.8389
2011-08-30	393	2	0
2011-08-31	394	3	0.25413
2011-09-01	394	4	0
2011-09-02	390	5	-1.02042
2011-09-05	390	1	0
2011-09-06	383	2	-1.81117
2011-09-07	378	3	-1.31408
2011-09-08	378	4	0
2011-09-09	379	5	0.264201
2011-09-12	370	1	-2.40332
2011-09-13	370	2	0
2011-09-14	367	3	-0.814116
2011-09-15	367	4	0
2011-09-16	361	5	-1.64839
2011-09-19	361	1	0
2011-09-20	361	2	0
2011-09-21	361	3	0
2011-09-22	361	4	0
2011-09-23	361	5	0
2011-09-26	344	1	-4.82363
2011-09-27	344	2	0
2011-09-28	332	3	-3.55067
2011-09-29	332	4	0
2011-09-30	332	5	0
2011-10-03	327	1	-1.51748
2011-10-04	320	2	-2.16392
2011-10-05	320	3	0
2011-10-06	326	4	1.85764
2011-10-07	324	5	-0.615387
2011-10-10	324	1	0
2011-10-11	324	2	0
2011-10-12	344	3	5.98981
2011-10-13	348	4	1.15608
2011-10-14	353	5	1.42656
2011-10-17	353	1	0
2011-10-18	353	2	0
2011-10-19	351	3	-0.568183
2011-10-20	351	4	0
2011-10-21	351	5	0
2011-10-24	349	1	-0.57143
2011-10-25	349	2	0
2011-10-26	351	3	0.57143
2011-10-27	347	4	-1.14614
2011-10-28	348	5	0.28777
2011-10-31	348	1	0
2011-11-01	348	2	0
2011-11-02	348	3	0
2011-11-03	348	4	0
2011-11-04	348	5	0
2011-11-07	339	1	-2.62024
2011-11-08	336	2	-0.888895
2011-11-09	329	3	-2.10534
2011-11-10	329	4	0
2011-11-11	325	5	-1.22326
2011-11-14	325	1	0
2011-11-15	326	2	0.30722
2011-11-16	321	3	-1.54563
2011-11-17	321	4	0
2011-11-18	327	5	1.8519
2011-11-21	317	1	-3.10584
2011-11-22	320	2	0.941922
2011-11-23	310	3	-3.17487
2011-11-24	310	4	0
2011-11-25	312	5	0.643089
2011-11-28	312	1	0
2011-11-29	312	2	0
2011-11-30	312	3	0
2011-12-01	315	4	0.956945
2011-12-02	315	5	0
2011-12-05	311	1	-1.27797
2011-12-06	307	2	-1.29452
2011-12-07	309	3	0.649353
2011-12-08	309	4	0
2011-12-09	309	5	0
2011-12-12	309	1	0
2011-12-13	309	2	0
2011-12-14	308	3	-0.324149
2011-12-15	308	4	0
2011-12-16	308	5	0
2011-12-19	316	1	2.56424
2011-12-20	320	2	1.25788
2011-12-21	321	3	0.312013
2011-12-22	321	4	0
2011-12-23	321	5	0
2011-12-26	321	1	0
2011-12-27	321	2	0
2011-12-28	321	3	0
2011-12-29	321	4	0
2011-12-30	321	5	0
2012-01-02	331	1	3.06773
2012-01-03	333	2	0.602411
2012-01-04	334	3	0.29985
2012-01-05	334	4	0
2012-01-06	334	5	0
2012-01-09	336	1	0.597017
2012-01-10	336	2	0
2012-01-11	336	3	0
2012-01-12	329	4	-2.10534
2012-01-13	327	5	-0.609758
2012-01-16	333.95	1	2.10311
2012-01-17	343.95	2	2.9505
2012-01-18	351.6	3	2.19979
2012-01-19	357.9	4	1.77595
2012-01-20	362.3	5	1.2219
2012-01-23	367.1	1	1.31617
2012-01-24	370.9	2	1.02982
2012-01-25	370.9	3	0
2012-01-26	371	4	0.0269578
2012-01-27	370.45	5	-0.148358
2012-01-30	358.45	1	-3.29293
2012-01-31	365.75	2	2.01609
2012-02-01	366.85	3	0.300301
2012-02-02	370.25	4	0.922541
2012-02-03	370.25	5	0
2012-02-06	368.15	1	-0.568799
2012-02-07	364.75	2	-0.927828
2012-02-08	368.35	3	0.982139
2012-02-09	368.2	4	-0.0407304
2012-02-10	367.1	5	-0.299198
2012-02-13	377.5	1	2.79363
2012-02-14	379.3	2	0.475688
2012-02-15	382.85	3	0.931582
2012-02-16	381.2	4	-0.43191
2012-02-17	381.2	5	0
2012-02-20	381.2	1	0
2012-02-21	381.2	2	0
2012-02-22	381.2	3	0
2012-02-23	381.3	4	0.0262295
2012-02-24	380.2	5	-0.288904
2012-02-27	383.5	1	0.864219
2012-02-28	387.5	2	1.03762
2012-02-29	384.6	3	-0.751202
2012-03-01	384.78	4	0.0467909
2012-03-02	388.48	5	0.956995
2012-03-05	387.44	1	-0.268069
2012-03-06	395.28	2	2.00334
2012-03-07	392	3	-0.833253
2012-03-08	396.13	4	1.04806
2012-03-09	391.05	5	-1.2907
2012-03-12	394	1	0.751548
2012-03-13	387	2	-1.79262
2012-03-14	387	3	0
2012-03-15	397	4	2.55116
2012-03-16	399	5	0.502514
2012-03-19	396	1	-0.754721
2012-03-20	391	2	-1.27067
2012-03-21	397	3	1.52287
2012-03-22	397	4	0
2012-03-23	397	5	0
2012-03-26	397	1	0
2012-03-27	397	2	0
2012-03-28	397	3	0
2012-03-29	397	4	0
2012-03-30	397	5	0
2012-04-02	397	1	0
2012-04-03	418	2	5.15452
2012-04-04	418	3	0
2012-04-05	418	4	0
2012-04-06	418	5	0
2012-04-09	425	1	1.66077
2012-04-10	425	2	0
2012-04-11	427	3	0.469484
2012-04-12	437	4	2.31492
2012-04-13	439	5	0.456622
2012-04-16	437	1	-0.456622
2012-04-17	439	2	0.456622
2012-04-18	435	3	-0.915338
2012-04-19	437	4	0.458716
2012-04-20	454	5	3.8164
2012-04-23	446	1	-1.77782
2012-04-24	456	2	2.21739
2012-04-25	461	3	1.09052
2012-04-26	467	4	1.29312
2012-04-27	473	5	1.27661
2012-04-30	473	1	0
2012-05-01	473	2	0
2012-05-02	473	3	0
2012-05-03	472	4	-0.21164
2012-05-04	480	5	1.68071
2012-05-07	475	1	-1.04713
2012-05-08	466	2	-1.91292
2012-05-09	463	3	-0.645858
2012-05-10	477	4	2.97894
2012-05-11	462	5	-3.19516
2012-05-14	461	1	-0.216685
2012-05-15	461	2	0
2012-05-16	461	3	0
2012-05-17	482	4	4.45461
2012-05-18	471	5	-2.3086
2012-05-21	471	1	0
2012-05-22	461	2	-2.14601
2012-05-23	461	3	0
2012-05-24	468	4	1.50703
2012-05-25	468	5	0
2012-05-28	468	1	0
2012-05-29	468	2	0
2012-05-30	468	3	0
2012-05-31	450	4	-3.92207
2012-06-01	450	5	0
2012-06-04	451	1	0.221976
2012-06-05	456	2	1.10255
2012-06-06	470	3	3.02399
2012-06-07	482	4	2.52114
2012-06-08	482	5	0
2012-06-11	486	1	0.826451
2012-06-12	491	2	1.02355
2012-06-13	481	3	-2.05769
2012-06-14	481	4	0
2012-06-15	466	5	-3.16816
2012-06-18	469	1	0.641713
2012-06-19	469	2	0
2012-06-20	469	3	0
2012-06-21	485	4	3.35461
2012-06-22	485	5	0
2012-06-25	493	1	1.63603
2012-06-26	493	2	0
2012-06-27	492	3	-0.203046
2012-06-28	497	4	1.01113
2012-06-29	497	5	0
2012-07-02	516	1	3.75167
2012-07-03	524	2	1.53849
2012-07-04	524	3	0
2012-07-05	524	4	0
2012-07-06	550	5	4.84266
2012-07-09	550	1	0
2012-07-10	562	2	2.15836
2012-07-11	560	3	-0.356507
2012-07-12	561	4	0.178412
2012-07-13	563	5	0.355872
2012-07-16	574	1	1.93498
2012-07-17	577	2	0.521287
2012-07-18	577	3	0
2012-07-19	606	4	4.90377
2012-07-20	619	5	2.12253
2012-07-23	597	1	-3.61882
2012-07-24	584	2	-2.20161
2012-07-25	603	3	3.20162
2012-07-26	580	4	-3.88891
2012-07-27	590	5	1.70944
2012-07-30	601	1	1.84724
2012-07-31	601	2	0
2012-08-01	601	3	0
2012-08-02	601	4	0
2012-08-03	601	5	0
2012-08-06	576	1	-4.24873
2012-08-07	569	2	-1.22272
2012-08-08	569	3	0
2012-08-09	569	4	0
2012-08-10	596	5	4.63602
2012-08-13	579	1	-2.89382
2012-08-14	579	2	0
2012-08-15	594	3	2.55768
2012-08-16	594	4	0
2012-08-17	601	5	1.17156
2012-08-20	601	1	0
2012-08-21	601	2	0
2012-08-22	624	3	3.75554
2012-08-23	625.35	4	0.216112
2012-08-24	625.35	5	0
2012-08-27	635.25	1	1.57071
2012-08-28	632.35	2	-0.457558
2012-08-29	647.95	3	2.43705
2012-08-30	647.95	4	0
2012-08-31	653.25	5	0.814637
2012-09-03	670.3	1	2.57655
2012-09-04	664	2	-0.944322
2012-09-05	653.7	3	-1.56336
2012-09-06	653.45	4	-0.0382512
2012-09-07	653.45	5	0
2012-09-10	648.4	1	-0.775823
2012-09-11	624.94	2	-3.68521
2012-09-12	634.58	3	1.53077
2012-09-13	626.71	4	-1.24794
2012-09-14	621.44	5	-0.844455
2012-09-17	601.5	1	-3.26128
2012-09-18	593	2	-1.42321
2012-09-19	597.9	3	0.822912
2012-09-20	586.6	4	-1.90804
2012-09-21	587.1	5	0.0852007
2012-09-24	592	1	0.831147
2012-09-25	576	2	-2.7399
2012-09-26	565	3	-1.92819
2012-09-27	564	4	-0.177148
2012-09-28	576	5	2.10534
2012-10-01	576	1	0
2012-10-02	552	2	-4.25596
2012-10-03	550	3	-0.362977
2012-10-04	550	4	0
2012-10-05	550	5	0
2012-10-08	557	1	1.2647
2012-10-09	557	2	0
2012-10-10	557	3	0
2012-10-11	557	4	0
2012-10-12	557	5	0
2012-10-15	547	1	-1.81164
2012-10-16	542	2	-0.91828
2012-10-17	546	3	0.735297
2012-10-18	546	4	0
2012-10-19	554	5	1.45457
2012-10-22	554	1	0
2012-10-23	567	2	2.31946
2012-10-24	579	3	2.09432
2012-10-25	579	4	0
2012-10-26	582	5	0.516797
2012-10-29	582	1	0
2012-10-30	576	2	-1.03628
2012-10-31	580	3	0.692044
2012-11-01	580	4	0
2012-11-02	580	5	0
2012-11-05	568	1	-2.09067
2012-11-06	572	2	0.701757
2012-11-07	571	3	-0.174978
2012-11-08	564	4	-1.2335
2012-11-09	551	5	-2.33194
2012-11-12	530	1	-3.88578
2012-11-13	529	2	-0.188857
2012-11-14	529	3	0
2012-11-15	533	4	0.753299
2012-11-16	524	5	-1.70297
2012-11-19	522	1	-0.38241
2012-11-20	522	2	0
2012-11-21	522	3	0
2012-11-22	522	4	0
2012-11-23	522	5	0
2012-11-26	526	1	0.763362
2012-11-27	538	2	2.25573
2012-11-28	540	3	0.371058
2012-11-29	540	4	0
2012-11-30	546	5	1.10498
2012-12-03	546	1	0
2012-12-04	549	2	0.547947
2012-12-05	562	3	2.34034
2012-12-06	562	4	0
2012-12-07	560	5	-0.356507
2012-12-10	560	1	0
2012-12-11	561	2	0.178412
2012-12-12	563	3	0.355872
2012-12-13	563	4	0
2012-12-14	563	5	0
2012-12-17	565	1	0.35461
2012-12-18	566	2	0.176835
2012-12-19	544	3	-3.96448
2012-12-20	535	4	-1.66825
2012-12-21	543	5	1.48426
2012-12-24	543	1	0
2012-12-25	543	2	0
2012-12-26	540	3	-0.554018
2012-12-27	540	4	0
2012-12-28	536	5	-0.743498
2012-12-31	536	1	0
2013-01-01	536	2	0
2013-01-02	536	3	0
2013-01-03	507	4	-5.56232
2013-01-04	507	5	0
2013-01-07	510	1	0.589972
2013-01-08	510	2	0
2013-01-09	494	3	-3.18752
2013-01-10	494	4	0
2013-01-11	483	5	-2.25189
2013-01-14	500	1	3.45914
2013-01-15	500	2	0
2013-01-16	504	3	0.796817
2013-01-17	504	4	0
2013-01-18	495	5	-1.80185
2013-01-21	495	1	0
2013-01-22	495	2	0
2013-01-23	495	3	0
2013-01-24	495	4	0
2013-01-25	495	5	0
2013-01-28	495	1	0
2013-01-29	509	2	2.78903
2013-01-30	509	3	0
2013-01-31	509	4	0
2013-02-01	509	5	0
2013-02-04	512	1	0.587661
2013-02-05	516	2	0.778214
2013-02-06	516	3	0
2013-02-07	510	4	-1.1696
2013-02-08	510	5	0
2013-02-11	510	1	0
2013-02-12	510	2	0
2013-02-13	510	3	0
2013-02-14	510	4	0
2013-02-15	510	5	0
2013-02-18	510	1	0
2013-02-19	510	2	0
2013-02-20	510	3	0
2013-02-21	510	4	0
2013-02-22	510	5	0
2013-02-25	510	1	0
2013-02-26	510	2	0
2013-02-27	510	3	0
2013-02-28	495	4	-2.9853
2013-03-01	499	5	0.804833
2013-03-04	495	1	-0.804833
2013-03-05	497	2	0.403226
2013-03-06	497	3	0
2013-03-07	496	4	-0.20141
2013-03-08	494	5	-0.404041
2013-03-11	494	1	0
2013-03-12	496	2	0.404041
2013-03-13	496	3	0
2013-03-14	470	4	-5.38432
2013-03-15	470	5	0
2013-03-18	454	1	-3.46355
2013-03-19	451	2	-0.662986
2013-03-20	456	3	1.10255
2013-03-21	456	4	0
2013-03-22	466	5	2.16928
2013-03-25	461	1	-1.07876
2013-03-26	461	2	0
2013-03-27	461	3	0
2013-03-28	461	4	0
2013-03-29	461	5	0
2013-04-01	461	1	0
2013-04-02	461	2	0
2013-04-03	461	3	0
2013-04-04	461	4	0
2013-04-05	461	5	0
2013-04-08	461	1	0
2013-04-09	461	2	0
2013-04-10	461	3	0
2013-04-11	461	4	0
2013-04-12	461	5	0
2013-04-15	461	1	0
2013-04-16	460	2	-0.217155
2013-04-17	460	3	0
2013-04-18	460	4	0
2013-04-19	460	5	0
2013-04-22	479	1	4.04741
2013-04-23	479	2	0
2013-04-24	479	3	0
2013-04-25	479	4	0
2013-04-26	479	5	0
2013-04-29	479	1	0
2013-04-30	479	2	0
2013-05-01	485	3	1.24483
2013-05-02	485	4	0
2013-05-03	485	5	0
2013-05-06	485	1	0
2013-05-07	485	2	0
2013-05-08	467	3	-3.78196
2013-05-09	467	4	0
2013-05-10	467	5	0
2013-05-13	488	1	4.39861
2013-05-14	488	2	0
2013-05-15	488	3	0
2013-05-16	489	4	0.204708
2013-05-17	489	5	0
2013-05-20	523	1	6.7219
2013-05-21	522	2	-0.191388
2013-05-22	522	3	0
2013-05-23	526	4	0.763362
2013-05-24	526	5	0
2013-05-27	526	1	0
2013-05-28	526	2	0
2013-05-29	526	3	0
2013-05-30	526	4	0
2013-05-31	526	5	0
2013-06-03	522	1	-0.763362
2013-06-04	522	2	0
2013-06-05	522	3	0
2013-06-06	513	4	-1.73917
2013-06-07	513	5	0
2013-06-10	505	1	-1.57174
2013-06-11	518	2	2.54168
2013-06-12	518	3	0
2013-06-13	503	4	-2.93851
2013-06-14	502	5	-0.199005
2013-06-17	500	1	-0.399202
2013-06-18	501	2	0.1998
2013-06-19	503	3	0.398407
2013-06-20	503	4	0
2013-06-21	503	5	0
2013-06-24	503	1	0
2013-06-25	509	2	1.18578
2013-06-26	509	3	0
2013-06-27	527	4	3.47525
2013-06-28	512	5	-2.88759
2013-07-01	507	1	-0.981362
2013-07-02	502	2	-0.991088
2013-07-03	500	3	-0.399202
2013-07-04	500	4	0
2013-07-05	500	5	0
2013-07-08	505	1	0.995033
2013-07-09	505	2	0
2013-07-10	505	3	0
2013-07-11	520	4	2.92704
2013-07-12	498	5	-4.32287
2013-07-15	501	1	0.600602
2013-07-16	510	2	1.78046
2013-07-17	510	3	0
2013-07-18	510	4	0
2013-07-19	518	5	1.55645
2013-07-22	518	1	0
2013-07-23	518	2	0
2013-07-24	518	3	0
2013-07-25	518	4	0
2013-07-26	518	5	0
2013-07-29	478	1	-8.03645
2013-07-30	473	2	-1.05153
2013-07-31	463	3	-2.13683
2013-08-01	465	4	0.431035
2013-08-02	445	5	-4.39631
2013-08-05	445	1	0
2013-08-06	445	2	0
2013-08-07	437	3	-1.81411
2013-08-08	437	4	0
2013-08-09	449	5	2.70897
2013-08-12	461	1	2.63752
2013-08-13	457	2	-0.871465
2013-08-14	465	3	1.7354
2013-08-15	465	4	0
2013-08-16	467	5	0.429185
2013-08-19	467	1	0
2013-08-20	470	2	0.640344
2013-08-21	481	3	2.31346
2013-08-22	481	4	0
2013-08-23	498	5	3.47328
2013-08-26	526	1	5.47011
2013-08-27	526	2	0
2013-08-28	514	3	-2.30779
2013-08-29	514	4	0
2013-08-30	509	5	-0.977525
2013-09-02	509	1	0
2013-09-03	529	2	3.85404
2013-09-04	521	3	-1.52384
2013-09-05	521	4	0
2013-09-06	521	5	0
2013-09-09	515	1	-1.15831
2013-09-10	511	2	-0.779731
2013-09-11	512	3	0.195503
2013-09-12	537	4	4.76735
2013-09-13	537	5	0
2013-09-16	520	1	-3.21693
2013-09-17	514	2	-1.16055
2013-09-18	514	3	0
2013-09-19	510	4	-0.781254
2013-09-20	502	5	-1.58106
2013-09-23	504	1	0.397615
2013-09-24	504	2	0
2013-09-25	512	3	1.57484
2013-09-26	512	4	0
2013-09-27	515	5	0.584228
2013-09-30	510	1	-0.975617
2013-10-01	510	2	0
2013-10-02	527	3	3.27898
2013-10-03	527	4	0
2013-10-04	547	5	3.72483
2013-10-07	547	1	0
2013-10-08	547	2	0
2013-10-09	546	3	-0.182983
2013-10-10	546	4	0
2013-10-11	540	5	-1.10498
2013-10-14	540	1	0
2013-10-15	519	2	-3.96653
2013-10-16	521	3	0.384616
2013-10-17	536	4	2.83841
2013-10-18	532	5	-0.749067
2013-10-21	532	1	0
2013-10-22	536	2	0.749067
2013-10-23	543	3	1.29752
2013-10-24	545	4	0.367647
2013-10-25	545	5	0
2013-10-28	540	1	-0.921666
2013-10-29	530	2	-1.86921
2013-10-30	524	3	-1.13853
2013-10-31	524	4	0
2013-11-01	524	5	0
2013-11-04	524	1	0
2013-11-05	524	2	0
2013-11-06	502	3	-4.28916
2013-11-07	502	4	0
2013-11-08	510	5	1.58106
2013-11-11	529	1	3.65777
2013-11-12	529	2	0
2013-11-13	527	3	-0.378788
2013-11-14	527	4	0
2013-11-15	522	5	-0.953296
2013-11-18	503	1	-3.70774
2013-11-19	508	2	0.989128
2013-11-20	499	3	-1.78754
2013-11-21	505	4	1.19523
2013-11-22	504	5	-0.198216
2013-11-25	523	1	3.70052
2013-11-26	523	2	0
2013-11-27	545	3	4.12043
2013-11-28	546	4	0.183318
2013-11-29	546	5	0
2013-12-02	550	1	0.72993
2013-12-03	550	2	0
2013-12-04	538	3	-2.20597
2013-12-05	538	4	0
2013-12-06	537	5	-0.186047
2013-12-09	537	1	0
2013-12-10	537	2	0
2013-12-11	537	3	0
2013-12-12	543	4	1.11112
2013-12-13	536	5	-1.29752
2013-12-16	536	1	0
2013-12-17	536	2	0
2013-12-18	552	3	2.94139
2013-12-19	546	4	-1.09291
2013-12-20	547	5	0.182983
2013-12-23	547	1	0
2013-12-24	547	2	0
2013-12-25	547	3	0
2013-12-26	547	4	0
2013-12-27	547	5	0
2013-12-30	544	1	-0.549956
2013-12-31	544	2	0
2014-01-01	544	3	0
2014-01-02	544	4	0
2014-01-03	544	5	0
2014-01-06	510	1	-6.45385
2014-01-07	494	2	-3.18752
2014-01-08	504	3	2.00408
2014-01-09	504	4	0
2014-01-10	506	5	0.39604
2014-01-13	500	1	-1.19286
2014-01-14	512	2	2.37165
2014-01-15	523	3	2.12568
2014-01-16	523	4	0
2014-01-17	520	5	-0.575265
2014-01-20	520	1	0
2014-01-21	520	2	0
2014-01-22	505	3	-2.92704
2014-01-23	505	4	0
2014-01-24	504	5	-0.198216
2014-01-27	504	1	0
2014-01-28	516	2	2.35305
2014-01-29	513	3	-0.583092
2014-01-30	513	4	0
2014-01-31	513	5	0
2014-02-03	518	1	0.96994
2014-02-04	525	2	1.3423
2014-02-05	535	3	1.88685
2014-02-06	530	4	-0.938974
2014-02-07	530	5	0
2014-02-10	542	1	2.2389
2014-02-11	539	2	-0.555043
2014-02-12	537	3	-0.371748
2014-02-13	537	4	0
2014-02-14	547	5	1.84507
2014-02-17	547	1	0
2014-02-18	547	2	0
2014-02-19	548	3	0.182648
2014-02-20	548	4	0
2014-02-21	545	5	-0.548949
2014-02-24	545	1	0
2014-02-25	559	2	2.53637
2014-02-26	562	3	0.535238
2014-02-27	562	4	0
2014-02-28	549	5	-2.34034
2014-03-03	549	1	0
2014-03-04	549	2	0
2014-03-05	549	3	0
2014-03-06	541	4	-1.46792
2014-03-07	539	5	-0.370371
2014-03-10	539	1	0
2014-03-11	526	2	-2.44144
2014-03-12	523	3	-0.571975
2014-03-13	523	4	0
2014-03-14	523	5	0
2014-03-17	523	1	0
2014-03-18	523	2	0
2014-03-19	544	3	3.93678
2014-03-20	544	4	0
2014-03-21	544	5	0
2014-03-24	544	1	0
2014-03-25	526	2	-3.3648
2014-03-26	537	3	2.06969
2014-03-27	537	4	0
2014-03-28	537	5	0
2014-03-31	518	1	-3.60229
2014-04-01	526	2	1.5326
2014-04-02	526	3	0
2014-04-03	526	4	0
2014-04-04	515	5	-2.11343
2014-04-07	515	1	0
2014-04-08	513	2	-0.389106
2014-04-09	510	3	-0.586512
2014-04-10	510	4	0
2014-04-11	510	5	0
2014-04-14	510	1	0
2014-04-15	511	2	0.195886
2014-04-16	522	3	2.1298
2014-04-17	522	4	0
2014-04-18	522	5	0
2014-04-21	522	1	0
2014-04-22	517	2	-0.962471
2014-04-23	515	3	-0.387597
2014-04-24	515	4	0
2014-04-25	514	5	-0.194364
2014-04-28	528	1	2.6873
2014-04-29	528	2	0
2014-04-30	528	3	0
2014-05-01	528	4	0
2014-05-02	528	5	0
2014-05-05	536	1	1.50379
2014-05-06	525	2	-2.07359
2014-05-07	520	3	-0.956945
2014-05-08	520	4	0
2014-05-09	520	5	0
2014-05-12	520	1	0
2014-05-13	528	2	1.52675
2014-05-14	539	3	2.06193
2014-05-15	539	4	0
2014-05-16	535	5	-0.744882
2014-05-19	535	1	0
2014-05-20	544	2	1.66825
2014-05-21	544	3	0
2014-05-22	544	4	0
2014-05-23	544	5	0
2014-05-26	543	1	-0.183993
2014-05-27	543	2	0
2014-05-28	534	3	-1.67135
2014-05-29	534	4	0
2014-05-30	534	5	0
2014-06-02	535	1	0.187091
2014-06-03	540	2	0.930239
2014-06-04	540	3	0
2014-06-05	535	4	-0.930239
2014-06-06	535	5	0
2014-06-09	528	1	-1.31705
2014-06-10	528	2	0
2014-06-11	520	3	-1.52675
2014-06-12	518	4	-0.385357
2014-06-13	504	5	-2.7399
2014-06-16	499	1	-0.997017
2014-06-17	499	2	0
2014-06-18	488	3	-2.22907
2014-06-19	490	4	0.408999
2014-06-20	490	5	0
2014-06-23	490	1	0
2014-06-24	494	2	0.813013
2014-06-25	491	3	-0.609139
2014-06-26	508	4	3.40373
2014-06-27	498	5	-1.98814
2014-06-30	498	1	0
2014-07-01	483	2	-3.05834
2014-07-02	484	3	0.206825
2014-07-03	481	4	-0.621764
2014-07-04	472	5	-1.88883
2014-07-07	472	1	0
2014-07-08	472	2	0
2014-07-09	472	3	0
2014-07-10	454	4	-3.88818
2014-07-11	435	5	-4.27512
2014-07-14	435	1	0
2014-07-15	442	2	1.59639
2014-07-16	433	3	-2.05722
2014-07-17	437	4	0.919547
2014-07-18	440	5	0.684153
2014-07-21	440	1	0
2014-07-22	440	2	0
2014-07-23	440	3	0
2014-07-24	454	4	3.13225
2014-07-25	462	5	1.74677
2014-07-28	462	1	0
2014-07-29	460	2	-0.43384
2014-07-30	460	3	0
2014-07-31	460	4	0
2014-08-01	460	5	0
2014-08-04	460	1	0
2014-08-05	460	2	0
2014-08-06	460	3	0
2014-08-07	460	4	0
2014-08-08	460	5	0
2014-08-11	460	1	0
2014-08-12	460	2	0
2014-08-13	460	3	0
2014-08-14	460	4	0
2014-08-15	460	5	0
2014-08-18	460	1	0
2014-08-19	460	2	0
2014-08-20	460	3	0
2014-08-21	460	4	0
2014-08-22	460	5	0
2014-08-25	460	1	0
2014-08-26	460	2	0
2014-08-27	460	3	0
2014-08-28	460	4	0
2014-08-29	460	5	0
2014-09-01	460	1	0
2014-09-02	446	2	-3.09075
2014-09-03	446	3	0
2014-09-04	442	4	-0.900907
2014-09-05	442	5	0
2014-09-08	434	1	-1.82653
2014-09-09	429	2	-1.15876
2014-09-10	426	3	-0.701757
2014-09-11	420	4	-1.41846
2014-09-12	420	5	0
2014-09-15	420	1	0
2014-09-16	420	2	0
2014-09-17	410	3	-2.40976
2014-09-18	409	4	-0.2442
2014-09-19	402	5	-1.72631
2014-09-22	402	1	0
2014-09-23	399	2	-0.749067
2014-09-24	396	3	-0.754721
2014-09-25	389	4	-1.78349
2014-09-26	389	5	0
2014-09-29	386	1	-0.774197
2014-09-30	388	2	0.516797
2014-10-01	388	3	0
2014-10-02	388	4	0
2014-10-03	387	5	-0.258065
2014-10-06	387	1	0
2014-10-07	394	2	1.79262
2014-10-08	397	3	0.758537
2014-10-09	397	4	0
2014-10-10	397	5	0
2014-10-13	397	1	0
2014-10-14	396	2	-0.252207
2014-10-15	396	3	0
2014-10-16	410	4	3.47429
2014-10-17	411	5	0.243605
2014-10-20	411	1	0
2014-10-21	429	2	4.28637
2014-10-22	429	3	0
2014-10-23	424	4	-1.17235
2014-10-24	432	5	1.86921
2014-10-27	458	1	5.84436
2014-10-28	458	2	0
2014-10-29	455	3	-0.657177
2014-10-30	476	4	4.51204
2014-10-31	457	5	-4.07345
2014-11-03	465	1	1.7354
2014-11-04	465	2	0
2014-11-05	443	3	-4.84676
2014-11-06	446	4	0.674918
2014-11-07	460	5	3.09075
2014-11-10	460	1	0
2014-11-11	450	2	-2.19789
2014-11-12	463	3	2.84795
2014-11-13	463	4	0
2014-11-14	447	5	-3.51685
2014-11-17	447	1	0
2014-11-18	443	2	-0.898882
2014-11-19	434	3	-2.05252
2014-11-20	421	4	-3.04117
2014-11-21	421	5	0
2014-11-24	421	1	0
2014-11-25	421	2	0
2014-11-26	461	3	9.07652
2014-11-27	461	4	0
2014-11-28	461	5	0
2014-12-01	440	1	-4.66233
2014-12-02	432	2	-1.83491
2014-12-03	430	3	-0.464038
2014-12-04	424	4	-1.40518
2014-12-05	437	5	3.01997
2014-12-08	437	1	0
2014-12-09	437	2	0
2014-12-10	437	3	0
2014-12-11	437	4	0
2014-12-12	437	5	0
2014-12-15	437	1	0
2014-12-16	435	2	-0.458716
2014-12-17	427	3	-1.8562
2014-12-18	427	4	0
2014-12-19	430	5	0.70012
2014-12-22	431	1	0.232288
2014-12-23	438	2	1.61108
2014-12-24	438	3	0
2014-12-25	438	4	0
2014-12-26	438	5	0
2014-12-29	438	1	0
2014-12-30	453	2	3.36732
2014-12-31	453	3	0
2015-01-01	453	4	0
2015-01-02	453	5	0
2015-01-05	453	1	0
2015-01-06	433	2	-4.51544
2015-01-07	433	3	0
2015-01-08	433	4	0
2015-01-09	432	5	-0.231214
2015-01-12	432	1	0
2015-01-13	409	2	-5.47104
2015-01-14	409	3	0
2015-01-15	402	4	-1.72631
2015-01-16	402	5	0
2015-01-19	402	1	0
2015-01-20	400	2	-0.498754
2015-01-21	400	3	0
2015-01-22	404	4	0.995033
2015-01-23	406	5	0.493828
2015-01-26	406	1	0
2015-01-27	418	2	2.91283
2015-01-28	418	3	0
2015-01-29	413	4	-1.20338
2015-01-30	413	5	0
2015-02-02	413	1	0
2015-02-03	413	2	0
2015-02-04	413	3	0
2015-02-05	413	4	0
2015-02-06	413	5	0
2015-02-09	413	1	0
2015-02-10	413	2	0
2015-02-11	413	3	0
2015-02-12	413	4	0
2015-02-13	413	5	0
2015-02-16	413	1	0
2015-02-17	413	2	0
2015-02-18	413	3	0
2015-02-19	405	4	-1.95605
2015-02-20	414	5	2.19789
2015-02-23	409	1	-1.21508
2015-02-24	410	2	0.2442
2015-02-25	413	3	0.729043
2015-02-26	413	4	0
2015-02-27	408	5	-1.21804
2015-03-02	408	1	0
2015-03-03	392	2	-4.00053
2015-03-04	386	3	-1.54245
2015-03-05	386	4	0
2015-03-06	386	5	0
2015-03-09	374	1	-3.15816
2015-03-10	381	2	1.85436
2015-03-11	377	3	-1.05542
2015-03-12	379	4	0.529102
2015-03-13	379	5	0
2015-03-16	379	1	0
2015-03-17	368	2	-2.94533
2015-03-18	359	3	-2.47605
2015-03-19	360	4	0.278164
2015-03-20	362	5	0.554018
2015-03-23	362	1	0
2015-03-24	362	2	0
2015-03-25	362	3	0
2015-03-26	362	4	0
2015-03-27	360	5	-0.554018
2015-03-30	358	1	-0.557105
2015-03-31	361	2	0.834497
2015-04-01	363	3	0.552488
2015-04-02	363	4	0
2015-04-03	363	5	0
2015-04-06	363	1	0
2015-04-07	361	2	-0.552488
2015-04-08	358	3	-0.834497
2015-04-09	358	4	0
2015-04-10	347	5	-3.12082
2015-04-13	347	1	0
2015-04-14	353	2	1.71433
2015-04-15	353	3	0
2015-04-16	353	4	0
2015-04-17	352	5	-0.283688
2015-04-20	360	1	2.24729
2015-04-21	360	2	0
2015-04-22	356	3	-1.11733
2015-04-23	359	4	0.839166
2015-04-24	359	5	0
2015-04-27	357	1	-0.558661
2015-04-28	357	2	0
2015-04-29	357	3	0
2015-04-30	357	4	0
2015-05-01	357	5	0
2015-05-04	371	1	3.84663
2015-05-05	356	2	-4.12713
2015-05-06	359	3	0.839166
2015-05-07	359	4	0
2015-05-08	358	5	-0.27894
2015-05-11	358	1	0
2015-05-12	358	2	0
2015-05-13	358	3	0
2015-05-14	358	4	0
2015-05-15	358	5	0
2015-05-18	358	1	0
2015-05-19	358	2	0
2015-05-20	358	3	0
2015-05-21	358	4	0
2015-05-22	358	5	0
2015-05-25	358	1	0
2015-05-26	358	2	0
2015-05-27	358	3	0
2015-05-28	351	4	-1.97468
2015-05-29	350	5	-0.285307
2015-06-01	350	1	0
2015-06-02	350	2	0
2015-06-03	350	3	0
2015-06-04	348	4	-0.573067
2015-06-05	348	5	0
2015-06-08	348	1	0
2015-06-09	348	2	0
2015-06-10	351	3	0.858374
2015-06-11	355	4	1.13316
2015-06-12	355	5	0
2015-06-15	355	1	0
2015-06-16	349	2	-1.70459
2015-06-17	359	3	2.82505
2015-06-18	361	4	0.555557
2015-06-19	364	5	0.827591
2015-06-22	361	1	-0.827591
2015-06-23	368	2	1.9205
2015-06-24	365	3	-0.818558
2015-06-25	360	4	-1.37933
2015-06-26	372	5	3.27898
2015-06-29	372	1	0
2015-06-30	372	2	0
2015-07-01	374	3	0.536194
2015-07-02	378	4	1.06384
2015-07-03	378	5	0
2015-07-06	371	1	-1.86921
2015-07-07	371	2	0
2015-07-08	375	3	1.0724
2015-07-09	375	4	0
2015-07-10	386	5	2.89113
2015-07-13	386	1	0
2015-07-14	391	2	1.28702
2015-07-15	391	3	0
2015-07-16	391	4	0
2015-07-17	392	5	0.255428
2015-07-20	387	1	-1.28371
2015-07-21	381	2	-1.56253
2015-07-22	388	3	1.8206
2015-07-23	381	4	-1.8206
2015-07-24	375	5	-1.58733
2015-07-27	375	1	0
2015-07-28	362	2	-3.52818
2015-07-29	368	3	1.64387
2015-07-30	374	4	1.61729
2015-07-31	370	5	-1.07528
2015-08-03	370	1	0
2015-08-04	360	2	-2.7399
2015-08-05	363	3	0.82988
2015-08-06	360	4	-0.82988
2015-08-07	363	5	0.82988
2015-08-10	367	1	1.0959
2015-08-11	367	2	0
2015-08-12	358	3	-2.48289
2015-08-13	358	4	0
2015-08-14	358	5	0
2015-08-17	358	1	0
2015-08-18	347	2	-3.12082
2015-08-19	343	3	-1.15943
2015-08-20	346	4	0.870833
2015-08-21	355	5	2.5679
2015-08-24	355	1	0
2015-08-25	355	2	0
2015-08-26	360	3	1.39862
2015-08-27	347	4	-3.67793
2015-08-28	350	5	0.860837
2015-08-31	350	1	0
2015-09-01	354	2	1.13638
2015-09-02	349	3	-1.4225
2015-09-03	352	4	0.855925
2015-09-04	350	5	-0.569802
2015-09-07	350	1	0
2015-09-08	350	2	0
2015-09-09	350	3	0
2015-09-10	345	4	-1.43887
2015-09-11	345	5	0
2015-09-14	352	1	2.00868
2015-09-15	355	2	0.848661
2015-09-16	355	3	0
2015-09-17	354	4	-0.282088
2015-09-18	349	5	-1.4225
2015-09-21	346	1	-0.863315
2015-09-22	347	2	0.2886
2015-09-23	344	3	-0.868312
2015-09-24	341	4	-0.875918
2015-09-25	342	5	0.292826
2015-09-28	342	1	0
2015-09-29	342	2	0
2015-09-30	346	3	1.1628
2015-10-01	347	4	0.2886
2015-10-02	337	5	-2.92418
2015-10-05	337	1	0
2015-10-06	342	2	1.47278
2015-10-07	342	3	0
2015-10-08	344	4	0.583092
2015-10-09	344	5	0
2015-10-12	344	1	0
2015-10-13	344	2	0
2015-10-14	358	3	3.98913
2015-10-15	357	4	-0.27972
2015-10-16	353	5	-1.12677
2015-10-19	353	1	0
2015-10-20	351	2	-0.568183
2015-10-21	349	3	-0.57143
2015-10-22	351	4	0.57143
2015-10-23	351	5	0
2015-10-26	344	1	-2.01446
2015-10-27	340	2	-1.1696
2015-10-28	340	3	0
2015-10-29	336	4	-1.18345
2015-10-30	343	5	2.06193
2015-11-02	344	1	0.291121
2015-11-03	344	2	0
2015-11-04	344	3	0
2015-11-05	343	4	-0.291121
2015-11-06	338	5	-1.46846
2015-11-09	338	1	0
2015-11-10	337	2	-0.296297
2015-11-11	330	3	-2.09903
2015-11-12	333	4	0.904984
2015-11-13	331	5	-0.602411
2015-11-16	331	1	0
2015-11-17	331	2	0
2015-11-18	331	3	0
2015-11-19	326	4	-1.5221
2015-11-20	326	5	0
2015-11-23	326	1	0
2015-11-24	323	2	-0.924506
2015-11-25	323	3	0
2015-11-26	320	4	-0.933133
2015-11-27	320	5	0
2015-11-30	320	1	0
2015-12-01	323	2	0.933133
2015-12-02	320	3	-0.933133
2015-12-03	316	4	-1.25788
2015-12-04	320	5	1.25788
2015-12-07	320	1	0
2015-12-08	320	2	0
2015-12-09	320	3	0
2015-12-10	320	4	0
2015-12-11	320	5	0
2015-12-14	300	1	-6.45385
2015-12-15	300	2	0
2015-12-16	296	3	-1.3423
2015-12-17	296	4	0
2015-12-18	302	5	2.00676
2015-12-21	305	1	0.988476
2015-12-22	303	2	-0.657897
2015-12-23	295	3	-2.67574
2015-12-24	295	4	0
2015-12-25	295	5	0
2015-12-28	295	1	0
2015-12-29	295	2	0
2015-12-30	295	3	0
2015-12-31	295	4	0
2016-01-01	295	5	0
2016-01-04	292	1	-1.02216
2016-01-05	289	2	-1.03271
2016-01-06	291	3	0.689658
2016-01-07	294	4	1.02565
2016-01-08	294	5	0
2016-01-11	294	1	0
2016-01-12	306	2	4.00053
2016-01-13	306	3	0
2016-01-14	306	4	0
2016-01-15	306	5	0
2016-01-18	306	1	0
2016-01-19	304	2	-0.65574
2016-01-20	304	3	0
2016-01-21	304	4	0
2016-01-22	304	5	0
2016-01-25	304	1	0
2016-01-26	304	2	0
2016-01-27	304	3	0
2016-01-28	304	4	0
2016-01-29	304	5	0
2016-02-01	304	1	0
2016-02-02	304	2	0
2016-02-03	304	3	0
2016-02-04	304	4	0
2016-02-05	304	5	0
2016-02-08	304	1	0
2016-02-09	304	2	0
2016-02-10	304	3	0
2016-02-11	304	4	0
2016-02-12	304	5	0
2016-02-15	304	1	0
2016-02-16	304	2	0
2016-02-17	304	3	0
2016-02-18	304	4	0
2016-02-19	304	5	0
2016-02-22	304	1	0
2016-02-23	304	2	0
2016-02-24	304	3	0
2016-02-25	304	4	0
2016-02-26	304	5	0
2016-02-29	304	1	0
2016-03-01	304	2	0
2016-03-02	291	3	-4.37044
2016-03-03	291	4	0
2016-03-04	291	5	0
2016-03-07	295	1	1.36521
2016-03-08	295	2	0
2016-03-09	295	3	0
2016-03-10	295	4	0
2016-03-11	306	5	3.66097
2016-03-14	306	1	0
2016-03-15	305	2	-0.327333
2016-03-16	300	3	-1.65293
2016-03-17	300	4	0
2016-03-18	297	5	-1.00503
2016-03-21	297	1	0
2016-03-22	296	2	-0.337268
2016-03-23	300	3	1.3423
2016-03-24	300	4	0
2016-03-25	300	5	0
2016-03-28	300	1	0
2016-03-29	300	2	0
2016-03-30	302	3	0.664454
2016-03-31	300	4	-0.664454
2016-04-01	299	5	-0.33389
2016-04-04	301	1	0.666669
2016-04-05	296	2	-1.67508
2016-04-06	296	3	0
2016-04-07	296	4	0
2016-04-08	302	5	2.00676
2016-04-11	302	1	0
2016-04-12	310	2	2.61453
2016-04-13	316	3	1.91699
2016-04-14	328	4	3.72714
2016-04-15	324	5	-1.22701
2016-04-18	335	1	3.3387
2016-04-19	330	2	-1.50379
2016-04-20	361	3	8.97853
2016-04-21	363	4	0.552488
2016-04-22	363	5	0
2016-04-25	353	1	-2.79348
2016-04-26	359	2	1.68543
2016-04-27	364	3	1.38315
2016-04-28	364	4	0
2016-04-29	368	5	1.09291
2016-05-02	368	1	0
2016-05-03	379	2	2.94533
2016-05-04	374	3	-1.32804
2016-05-05	375	4	0.267023
2016-05-06	368	5	-1.88431
2016-05-09	373	1	1.34955
2016-05-10	372	2	-0.268457
2016-05-11	372	3	0
2016-05-12	397	4	6.50424
2016-05-13	397	5	0
2016-05-16	397	1	0
2016-05-17	397	2	0
2016-05-18	397	3	0
2016-05-19	397	4	0
2016-05-20	397	5	0
2016-05-23	397	1	0
2016-05-24	397	2	0
2016-05-25	397	3	0
2016-05-26	397	4	0
2016-05-27	397	5	0
2016-05-30	397	1	0
2016-05-31	397	2	0
2016-06-01	397	3	0
2016-06-02	397	4	0
2016-06-03	397	5	0
2016-06-06	397	1	0
2016-06-07	397	2	0
2016-06-08	397	3	0
2016-06-09	397	4	0
2016-06-10	397	5	0
2016-06-13	397	1	0
2016-06-14	397	2	0
2016-06-15	440	3	10.2838
2016-06-16	439	4	-0.227531
2016-06-17	439	5	0
2016-06-20	439	1	0
2016-06-21	432	2	-1.60738
2016-06-22	426	3	-1.39862
2016-06-23	428	4	0.468385
2016-06-24	423	5	-1.1751
2016-06-27	416	1	-1.66869
2016-06-28	416	2	0
2016-06-29	434	3	4.23593
2016-06-30	437	4	0.688866
2016-07-01	444	5	1.58914
2016-07-04	444	1	0
2016-07-05	422	2	-5.08192
2016-07-06	422	3	0
2016-07-07	406	4	-3.86522
2016-07-08	406	5	0
2016-07-11	406	1	0
2016-07-12	406	2	0
2016-07-13	406	3	0
2016-07-14	406	4	0
2016-07-15	406	5	0
2016-07-18	415	1	2.19254
2016-07-19	415	2	0
2016-07-20	407	3	-1.94653
2016-07-21	400	4	-1.73486
2016-07-22	397	5	-0.752827
2016-07-25	390	1	-1.77895
2016-07-26	385	2	-1.29034
2016-07-27	385	3	0
2016-07-28	385	4	0
2016-07-29	385	5	0
2016-08-01	395	1	2.56424
2016-08-02	380	2	-3.87145
2016-08-03	374	3	-1.59155
2016-08-04	373	4	-0.267738
2016-08-05	380	5	1.85928
2016-08-08	380	1	0
2016-08-09	381	2	0.262812
2016-08-10	381	3	0
2016-08-11	381	4	0
2016-08-12	375	5	-1.58733
2016-08-15	375	1	0
2016-08-16	375	2	0
2016-08-17	377	3	0.531916
2016-08-18	377	4	0
2016-08-19	374	5	-0.798939
2016-08-22	374	1	0
2016-08-23	374	2	0
2016-08-24	373	3	-0.267738
2016-08-25	373	4	0
2016-08-26	363	5	-2.71756
2016-08-29	360	1	-0.82988
2016-08-30	356	2	-1.11733
2016-08-31	350	3	-1.69976
2016-09-01	348	4	-0.573067
2016-09-02	346	5	-0.57637
2016-09-05	346	1	0
2016-09-06	346	2	0
2016-09-07	347	3	0.2886
2016-09-08	351	4	1.14614
2016-09-09	351	5	0
2016-09-12	350	1	-0.285307
2016-09-13	345	2	-1.43887
2016-09-14	340	3	-1.45988
2016-09-15	341	4	0.293686
2016-09-16	343	5	0.584797
2016-09-19	346	1	0.870833
2016-09-20	344	2	-0.579712
2016-09-21	344	3	0
2016-09-22	340	4	-1.1696
2016-09-23	340	5	0
2016-09-26	332	1	-2.38106
2016-09-27	329	2	-0.907722
2016-09-28	331	3	0.606062
2016-09-29	331	4	0
2016-09-30	330	5	-0.302572
2016-10-03	329	1	-0.30349
2016-10-04	340	2	3.28879
2016-10-05	382	3	11.6475
2016-10-06	336	4	-12.8309
2016-10-07	333	5	-0.896867
2016-10-10	333	1	0
2016-10-11	333	2	0
2016-10-12	330	3	-0.904984
2016-10-13	330	4	0
2016-10-14	334	5	1.20483
2016-10-17	332	1	-0.600602
2016-10-18	339	2	2.08651
2016-10-19	337	3	-0.591718
2016-10-20	337	4	0
2016-10-21	333	5	-1.19404
2016-10-24	333	1	0
2016-10-25	333	2	0
2016-10-26	344	3	3.24992
2016-10-27	344	4	0
2016-10-28	342	5	-0.583092
2016-10-31	340	1	-0.586512
2016-11-01	334	2	-1.78046
2016-11-02	333	3	-0.29985
2016-11-03	333	4	0
2016-11-04	336	5	0.896867
2016-11-07	336	1	0
2016-11-08	336	2	0
2016-11-09	336	3	0
2016-11-10	336	4	0
2016-11-11	336	5	0
2016-11-14	336	1	0
2016-11-15	336	2	0
2016-11-16	336	3	0
2016-11-17	336	4	0
2016-11-18	334	5	-0.597017
2016-11-21	335	1	0.298954
2016-11-22	336	2	0.298063
2016-11-23	336	3	0
2016-11-24	336	4	0
2016-11-25	336	5	0
2016-11-28	339	1	0.888895
2016-11-29	339	2	0
2016-11-30	339	3	0
2016-12-01	339	4	0
2016-12-02	339	5	0
2016-12-05	339	1	0
2016-12-06	339	2	0
2016-12-07	339	3	0
2016-12-08	339	4	0
2016-12-09	339	5	0
2016-12-12	339	1	0
2016-12-13	339	2	0
2016-12-14	339	3	0
2016-12-15	339	4	0
2016-12-16	339	5	0
2016-12-19	339	1	0
2016-12-20	315	2	-7.34275
2016-12-21	315	3	0
2016-12-22	315	4	0
2016-12-23	315	5	0
2016-12-26	315	1	0
2016-12-27	328	2	4.0441
2016-12-28	337	3	2.70693
2016-12-29	337	4	0
2016-12-30	337	5	0
2017-01-02	334	1	-0.894194
2017-01-03	342	2	2.36697
2017-01-04	341	3	-0.292826
2017-01-05	347	4	1.74423
2017-01-06	333	5	-4.11823
2017-01-09	333	1	0
2017-01-10	333	2	0
2017-01-11	333	3	0
2017-01-12	333	4	0
2017-01-13	333	5	0
2017-01-16	333	1	0
2017-01-17	333	2	0
2017-01-18	333	3	0
2017-01-19	333	4	0
2017-01-20	333	5	0
2017-01-23	333	1	0
2017-01-24	333	2	0
2017-01-25	368	3	9.99404
2017-01-26	369	4	0.271371
2017-01-27	369	5	0
2017-01-30	369	1	0
2017-01-31	369	2	0
2017-02-01	369	3	0
2017-02-02	369	4	0
2017-02-03	369	5	0
2017-02-06	369	1	0
2017-02-07	369	2	0
2017-02-08	369	3	0
2017-02-09	365	4	-1.08993
2017-02-10	360	5	-1.37933
2017-02-13	360	1	0
2017-02-14	362	2	0.554018
2017-02-15	362	3	0
2017-02-16	362	4	0
2017-02-17	362	5	0
2017-02-20	362	1	0
2017-02-21	359	2	-0.832182
2017-02-22	359	3	0
2017-02-23	356	4	-0.839166
2017-02-24	352	5	-1.12996
2017-02-27	346	1	-1.71924
2017-02-28	346	2	0
2017-03-01	346	3	0
2017-03-02	346	4	0
2017-03-03	347	5	0.2886
2017-03-06	347	1	0
2017-03-07	340	2	-2.03792
2017-03-08	345	3	1.45988
2017-03-09	340	4	-1.45988
2017-03-10	340	5	0
2017-03-13	337	1	-0.886269
2017-03-14	337	2	0
2017-03-15	340	3	0.886269
2017-03-16	335	4	-1.48151
2017-03-17	335	5	0
2017-03-20	340	1	1.48151
2017-03-21	341	2	0.293686
2017-03-22	341	3	0
2017-03-23	341	4	0
2017-03-24	341	5	0
2017-03-27	341	1	0
2017-03-28	325	2	-4.80573
2017-03-29	315	3	-3.12525
2017-03-30	315	4	0
2017-03-31	313	5	-0.636945
2017-04-03	310	1	-0.963089
2017-04-04	311	2	0.322061
2017-04-05	313	3	0.641028
2017-04-06	313	4	0
2017-04-07	313	5	0
2017-04-10	312	1	-0.32
2017-04-11	312	2	0
2017-04-12	315	3	0.956945
2017-04-13	315	4	0
2017-04-14	315	5	0
2017-04-17	315	1	0
2017-04-18	315	2	0
2017-04-19	315	3	0
2017-04-20	315	4	0
2017-04-21	315	5	0
2017-04-24	315	1	0
2017-04-25	315	2	0
2017-04-26	315	3	0
2017-04-27	315	4	0
2017-04-28	315	5	0
2017-05-01	315	1	0
2017-05-02	315	2	0
2017-05-03	315	3	0
2017-05-04	315	4	0
2017-05-05	315	5	0
2017-05-08	315	1	0
2017-05-09	315	2	0
2017-05-10	315	3	0
2017-05-11	315	4	0
2017-05-12	315	5	0
2017-05-15	315	1	0
2017-05-16	315	2	0
2017-05-17	315	3	0
2017-05-18	315	4	0
2017-05-19	315	5	0
2017-05-22	310	1	-1.60003
2017-05-23	315	2	1.60003
2017-05-24	315	3	0
2017-05-25	315	4	0
2017-05-26	315	5	0
2017-05-29	305	1	-3.22609
2017-05-30	305	2	0
2017-05-31	302	3	-0.988476
2017-06-01	305	4	0.988476
2017-06-02	304	5	-0.328408
2017-06-05	309	1	1.63136
2017-06-06	306	2	-0.975617
2017-06-07	307	3	0.326265
2017-06-08	310	4	0.972455
2017-06-09	311	5	0.322061
2017-06-12	309	1	-0.645164
2017-06-13	304	2	-1.63136
2017-06-14	306	3	0.65574
2017-06-15	302	4	-1.31581
2017-06-16	303	5	0.330579
2017-06-19	303	1	0
2017-06-20	303	2	0
2017-06-21	298	3	-1.66393
2017-06-22	294	4	-1.35137
2017-06-23	295	5	0.339559
2017-06-26	293	1	-0.680275
2017-06-27	293	2	0
2017-06-28	294	3	0.340716
2017-06-29	298	4	1.35137
2017-06-30	304	5	1.99342
2017-07-03	307	1	0.982005
2017-07-04	307	2	0
2017-07-05	313	3	1.93554
2017-07-06	316	4	0.953902
2017-07-07	322	5	1.88093
2017-07-10	322	1	0
2017-07-11	329	2	2.15062
2017-07-12	329	3	0
2017-07-13	329	4	0
2017-07-14	329	5	0
2017-07-17	329	1	0
2017-07-18	329	2	0
2017-07-19	329	3	0
2017-07-20	329	4	0
2017-07-21	329	5	0
2017-07-24	329	1	0
2017-07-25	329	2	0
2017-07-26	329	3	0
2017-07-27	329	4	0
2017-07-28	329	5	0
2017-07-31	329	1	0
2017-08-01	329	2	0
2017-08-02	329	3	0
2017-08-03	329	4	0
2017-08-04	329	5	0
2017-08-07	329	1	0
2017-08-08	329	2	0
2017-08-09	329	3	0
2017-08-10	329	4	0
2017-08-11	329	5	0
2017-08-14	315	1	-4.34851
2017-08-15	315	2	0
2017-08-16	315	3	0
2017-08-17	315	4	0
2017-08-18	315	5	0
2017-08-21	315	1	0
2017-08-22	315	2	0
2017-08-23	315	3	0
2017-08-24	315	4	0
2017-08-25	315	5	0
2017-08-28	316	1	0.316957
2017-08-29	315	2	-0.316957
2017-08-30	315	3	0
2017-08-31	315	4	0
2017-09-01	315	5	0
2017-09-04	311	1	-1.27797
2017-09-05	311	2	0
2017-09-06	321	3	3.16482
2017-09-07	320	4	-0.312013
2017-09-08	317	5	-0.941922
2017-09-11	317	1	0
2017-09-12	317	2	0
2017-09-13	317	3	0
2017-09-14	317	4	0
2017-09-15	317	5	0
2017-09-18	317	1	0
2017-09-19	310	2	-2.23295
2017-09-20	311	3	0.322061
2017-09-21	315	4	1.27797
2017-09-22	315	5	0
2017-09-25	315	1	0
2017-09-26	315	2	0
2017-09-27	315	3	0
2017-09-28	315	4	0
2017-09-29	315	5	0
2017-10-02	315	1	0
2017-10-03	317	2	0.632914
2017-10-04	316	3	-0.315956
2017-10-05	315	4	-0.316957
2017-10-06	315	5	0
2017-10-09	315	1	0
2017-10-10	314	2	-0.317965
2017-10-11	314	3	0
2017-10-12	314	4	0
2017-10-13	314	5	0
2017-10-16	314	1	0
2017-10-17	314	2	0
2017-10-18	314	3	0
2017-10-19	314	4	0
2017-10-20	314	5	0
2017-10-23	314	1	0
2017-10-24	314	2	0
2017-10-25	314	3	0
2017-10-26	314	4	0
2017-10-27	314	5	0
2017-10-30	314	1	0
2017-10-31	314	2	0
2017-11-01	314	3	0
2017-11-02	314	4	0
2017-11-03	314	5	0
2017-11-06	314	1	0
2017-11-07	314	2	0
2017-11-08	314	3	0
2017-11-09	314	4	0
2017-11-10	314	5	0
2017-11-13	319	1	1.57981
2017-11-14	316	2	-0.944889
2017-11-15	316	3	0
2017-11-16	318	4	0.630917
2017-11-17	319	5	0.313972
2017-11-20	326	1	2.17063
2017-11-21	326	2	0
2017-11-22	326	3	0
2017-11-23	337	4	3.31855
2017-11-24	337	5	0
2017-11-27	326	1	-3.31855
2017-11-28	337	2	3.31855
2017-11-29	336	3	-0.297177
2017-11-30	339	4	0.888895
2017-12-01	338	5	-0.295421
2017-12-04	346	1	2.33929
2017-12-05	346	2	0
2017-12-06	346	3	0
2017-12-07	346	4	0
2017-12-08	346	5	0
2017-12-11	346	1	0
2017-12-12	344	2	-0.579712
2017-12-13	344	3	0
2017-12-14	344	4	0
2017-12-15	344	5	0
2017-12-18	338	1	-1.75958
2017-12-19	338	2	0
2017-12-20	338	3	0
2017-12-21	338	4	0
2017-12-22	338	5	0
2017-12-25	338	1	0
2017-12-26	330	2	-2.39532
2017-12-27	330	3	0
2017-12-28	330	4	0
2017-12-29	330	5	0
2018-01-01	330	1	0
2018-01-02	330	2	0
2018-01-03	330	3	0
2018-01-04	330	4	0
2018-01-05	330	5	0
2018-01-08	330	1	0
2018-01-09	330	2	0
2018-01-10	330	3	0
2018-01-11	330	4	0
2018-01-12	330	5	0
2018-01-15	337	1	2.09903
2018-01-16	343	2	1.76475
2018-01-17	343	3	0
2018-01-18	345	4	0.581397
2018-01-19	345	5	0
2018-01-22	345	1	0
2018-01-23	345	2	0
2018-01-24	345	3	0
2018-01-25	362	4	4.80998
2018-01-26	363	5	0.275862
2018-01-29	363	1	0
2018-01-30	363	2	0
2018-01-31	364	3	0.275103
2018-02-01	373	4	2.44246
2018-02-02	373	5	0
2018-02-05	373	1	0
2018-02-06	373	2	0
2018-02-07	392	3	4.96834
2018-02-08	392	4	0
2018-02-09	392	5	0
2018-02-12	392	1	0
2018-02-13	379	2	-3.37256
2018-02-14	379	3	0
2018-02-15	379	4	0
2018-02-16	419	5	10.0335
2018-02-19	419	1	0
2018-02-20	419	2	0
2018-02-21	419	3	0
2018-02-22	420	4	0.238379
2018-02-23	419	5	-0.238379
2018-02-26	419	1	0
2018-02-27	415	2	-0.95924
2018-02-28	428	3	3.08447
2018-03-01	428	4	0
2018-03-02	428	5	0
2018-03-05	428	1	0
2018-03-06	428	2	0
2018-03-07	428	3	0
2018-03-08	422	4	-1.41179
2018-03-09	422	5	0
2018-03-12	422	1	0
2018-03-13	422	2	0
2018-03-14	422	3	0
2018-03-15	412	4	-2.3982
2018-03-16	412	5	0
2018-03-19	412	1	0
2018-03-20	412	2	0
2018-03-21	412	3	0
2018-03-22	412	4	0
2018-03-23	412	5	0
2018-03-26	412	1	0
2018-03-27	310	2	-28.4451
2018-03-28	310	3	0
2018-03-29	310	4	0
2018-03-30	310	5	0
2018-04-02	310	1	0
2018-04-03	310	2	0
2018-04-04	310	3	0
2018-04-05	310	4	0
2018-04-06	310	5	0
2018-04-09	310	1	0
2018-04-10	310	2	0
2018-04-11	310	3	0
2018-04-12	310	4	0
2018-04-13	310	5	0
2018-04-16	310	1	0
2018-04-17	310	2	0
2018-04-18	428	3	32.2551
2018-04-19	428	4	0
2018-04-20	428	5	0
2018-04-23	428	1	0
2018-04-24	310	2	-32.2551
2018-04-25	310	3	0
2018-04-26	310	4	0
2018-04-27	310	5	0
2018-04-30	310	1	0
2018-05-01	310	2	0
2018-05-02	310	3	0
2018-05-03	310	4	0
2018-05-04	310	5	0
2018-05-07	310	1	0
2018-05-08	310	2	0
2018-05-09	310	3	0
2018-05-10	310	4	0
2018-05-11	310	5	0
2018-05-14	310	1	0
2018-05-15	310	2	0
2018-05-16	310	3	0
2018-05-17	310	4	0
2018-05-18	310	5	0
2018-05-21	310	1	0
2018-05-22	310	2	0
2018-05-23	310	3	0
2018-05-24	310	4	0
2018-05-25	310	5	0
2018-05-28	310	1	0
2018-05-29	310	2	0
2018-05-30	310	3	0
2018-05-31	310	4	0
2018-06-01	310	5	0
2018-06-04	310	1	0
2018-06-05	310	2	0
2018-06-06	310	3	0
2018-06-07	310	4	0
2018-06-08	310	5	0
2018-06-11	310	1	0
2018-06-12	310	2	0
2018-06-13	310	3	0
2018-06-14	310	4	0
2018-06-15	310	5	0
2018-06-18	310	1	0
2018-06-19	310	2	0
2018-06-20	310	3	0
2018-06-21	310	4	0
2018-06-22	310	5	0
2018-06-25	310	1	0
2018-06-26	310	2	0
2018-06-27	310	3	0
2018-06-28	310	4	0
2018-06-29	310	5	0
2018-07-02	310	1	0
2018-07-03	310	2	0
2018-07-04	310	3	0
2018-07-05	310	4	0
2018-07-06	310	5	0
2018-07-09	310	1	0
2018-07-10	310	2	0
2018-07-11	381	3	20.6227
2018-07-12	380	4	-0.262812
2018-07-13	376	5	-1.05821
2018-07-16	377	1	0.265604
2018-07-17	377	2	0
2018-07-18	383	3	1.57898
2018-07-19	385	4	0.520835
2018-07-20	385	5	0
2018-07-23	385	1	0
2018-07-24	385	2	0
2018-07-25	385	3	0
2018-07-26	385	4	0
2018-07-27	385	5	0
2018-07-30	385	1	0
2018-07-31	385	2	0
2018-08-01	385	3	0
2018-08-02	385	4	0
2018-08-03	385	5	0
2018-08-06	380	1	-1.30721
2018-08-07	380	2	0
2018-08-08	380	3	0
2018-08-09	380	4	0
2018-08-10	380	5	0
2018-08-13	380	1	0
2018-08-14	380	2	0
2018-08-15	380	3	0
2018-08-16	380	4	0
2018-08-17	380	5	0
2018-08-20	380	1	0
2018-08-21	380	2	0
2018-08-22	380	3	0
2018-08-23	380	4	0
2018-08-24	380	5	0
2018-08-27	380	1	0
2018-08-28	380	2	0
2018-08-29	380	3	0
2018-08-30	380	4	0
[truncated: 931 more rows]
[truncated: 1 more columns]

## Sheet: Soybeans
2010-12-31	13.41
2011-01-03	13.47	1	0.446429
2011-01-04	13.35	2	-0.894861
2011-01-05	12.59	3	-5.86135
2011-01-06	13.43	4	6.45882
2011-01-07	13.29	5	-1.04791
2011-01-10	13.46	1	1.27105
2011-01-11	13.23	2	-1.72353
2011-01-12	13.77	3	4.00053
2011-01-13	13.79	4	0.145138
2011-01-14	13.85	5	0.434154
2011-01-17	13.85	1	0
2011-01-18	13.74	2	-0.797395
2011-01-19	13.7	3	-0.291545
2011-01-20	13.73	4	0.218739
2011-01-21	13.7	5	-0.218739
2011-01-24	13.68	1	-0.146092
2011-01-25	13.38	2	-2.21739
2011-01-26	13.49	3	0.818762
2011-01-27	13.63	4	1.03246
2011-01-28	13.61	5	-0.146843
2011-01-31	13.79	1	1.31389
2011-02-01	13.79	2	0
2011-02-02	13.79	3	0
2011-02-03	14.01	4	1.58277
2011-02-04	13.99	5	-0.142857
2011-02-07	13.93	1	-0.4298
2011-02-08	14.03	2	0.715311
2011-02-09	14.19	3	1.13396
2011-02-10	14.01	4	-1.27661
2011-02-11	13.84	5	-1.22084
2011-02-14	13.72	1	-0.870833
2011-02-15	13.38	2	-2.50936
2011-02-16	13.36	3	-0.149589
2011-02-17	13.74	4	2.80461
2011-02-18	13.38	5	-2.65502
2011-02-21	13.38	1	0
2011-02-22	12.68	2	-5.37351
2011-02-23	12.89	3	1.64259
2011-02-24	12.88	4	-0.0776096
2011-02-25	12.88	5	0
2011-02-28	13.28	1	3.05834
2011-03-01	13.4	2	0.899556
2011-03-02	13.59	3	1.40795
2011-03-03	13.59	4	0
2011-03-04	13.81	5	1.60587
2011-03-07	13.63	1	-1.31197
2011-03-08	13.5	2	-0.958356
2011-03-09	13.17	3	-2.47482
2011-03-10	13.22	4	0.378932
2011-03-11	13.01	5	-1.60125
2011-03-14	12.06	1	-7.58241
2011-03-15	12.34	2	2.29518
2011-03-16	12.55	3	1.68746
2011-03-17	13.03	4	3.75337
2011-03-18	13.29	5	1.97575
2011-03-21	13.3	1	0.0752163
2011-03-22	13.34	2	0.300301
2011-03-23	13.2	3	-1.05502
2011-03-24	13.25	4	0.378072
2011-03-25	13.29	5	0.301432
2011-03-28	13.2	1	-0.679504
2011-03-29	13.33	2	0.98003
2011-03-30	13.43	3	0.747388
2011-03-31	13.81	4	2.7902
2011-04-01	13.66	5	-1.09211
2011-04-04	13.56	1	-0.734757
2011-04-05	13.45	2	-0.814518
2011-04-06	13.48	3	0.2228
2011-04-07	13.36	4	-0.894194
2011-04-08	13.64	5	2.07415
2011-04-11	13.41	1	-1.7006
2011-04-12	13.05	2	-2.72126
2011-04-13	13.07	3	0.153139
2011-04-14	13.06	4	-0.0765404
2011-04-15	13.07	5	0.0765404
2011-04-18	13.21	1	1.06546
2011-04-19	13.17	2	-0.30326
2011-04-20	13.13	3	-0.304183
2011-04-21	13.58	4	3.36984
2011-04-22	13.58	5	0
2011-04-25	13.68	1	0.733679
2011-04-26	13.63	2	-0.366167
2011-04-27	13.58	3	-0.367512
2011-04-28	13.29	4	-2.15862
2011-04-29	13.71	5	3.11136
2011-05-02	13.7	1	-0.0729661
2011-05-03	13.41	2	-2.13951
2011-05-04	13.29	3	-0.898882
2011-05-05	13	4	-2.20625
2011-05-06	13.07	5	0.537017
2011-05-09	13.15	1	0.610223
2011-05-10	13.2	2	0.379507
2011-05-11	13.14	3	-0.455582
2011-05-12	13.28	4	1.05981
2011-05-13	13.13	5	-1.13595
2011-05-16	13.09	1	-0.305111
2011-05-17	13.24	2	1.1394
2011-05-18	13.63	3	2.90307
2011-05-19	13.64	4	0.0733407
2011-05-20	13.67	5	0.2197
2011-05-23	13.6	1	-0.513386
2011-05-24	13.59	2	-0.0735565
2011-05-25	13.65	3	0.440529
2011-05-26	13.73	4	0.58437
2011-05-27	13.74	5	0.0728067
2011-05-30	13.74	1	0
2011-05-31	13.7	2	-0.291545
2011-06-01	13.81	3	0.799713
2011-06-02	14.01	4	1.43784
2011-06-03	14.08	5	0.498399
2011-06-06	13.76	1	-2.29895
2011-06-07	13.85	2	0.65194
2011-06-08	13.93	3	0.575956
2011-06-09	13.86	4	-0.503779
2011-06-10	13.78	5	-0.578873
2011-06-13	13.76	1	-0.145243
2011-06-14	13.61	2	-1.0961
2011-06-15	13.61	3	0
2011-06-16	13.44	4	-1.25695
2011-06-17	13.3	5	-1.04713
2011-06-20	13.34	1	0.300301
2011-06-21	13.47	2	0.969795
2011-06-22	13.29	3	-1.34531
2011-06-23	13.17	4	-0.907036
2011-06-24	13.18	5	0.0759013
2011-06-27	13.28	1	0.755861
2011-06-28	13.29	2	0.0752729
2011-06-29	13.33	3	0.300526
2011-06-30	13.03	4	-2.27627
2011-07-01	13.17	5	1.06871
2011-07-04	13.17	1	0
2011-07-05	13.24	2	0.530103
2011-07-06	13.23	3	-0.0755572
2011-07-07	13.46	4	1.72353
2011-07-08	13.52	5	0.444775
2011-07-11	13.61	1	0.663475
2011-07-12	13.31	2	-2.22892
2011-07-13	13.8	3	3.6153
2011-07-14	13.88	4	0.578036
2011-07-15	13.91	5	0.215905
2011-07-18	13.91	1	0
2011-07-19	13.84	2	-0.504506
2011-07-20	13.81	3	-0.216998
2011-07-21	13.83	4	0.144718
2011-07-22	13.81	5	-0.144718
2011-07-25	13.68	1	-0.945806
2011-07-26	13.85	2	1.23503
2011-07-27	13.78	3	-0.506697
2011-07-28	13.67	4	-0.801461
2011-07-29	13.53	5	-1.02942
2011-08-01	13.55	1	0.147711
2011-08-02	13.7	2	1.10093
2011-08-03	13.63	3	-0.512259
2011-08-04	13.34	4	-2.15062
2011-08-05	13.25	5	-0.676949
2011-08-08	13.02	1	-1.75109
2011-08-09	12.89	2	-1.00348
2011-08-10	12.9	3	0.0775494
2011-08-11	13.23	4	2.52597
2011-08-12	13.26	5	0.226501
2011-08-15	13.4	1	1.05027
2011-08-16	13.38	2	-0.149365
2011-08-17	13.54	3	1.18872
2011-08-18	13.49	4	-0.36996
2011-08-19	13.56	5	0.517561
2011-08-22	13.73	1	1.24589
2011-08-23	13.84	2	0.797973
2011-08-24	13.82	3	-0.144613
2011-08-25	13.84	4	0.144613
2011-08-26	14.09	5	1.79024
2011-08-29	14.31	1	1.54933
2011-08-30	14.38	2	0.487976
2011-08-31	14.39	3	0.0695169
2011-09-01	14.09	4	-2.10682
2011-09-02	14.21	5	0.848062
2011-09-05	14.21	1	0
2011-09-06	14.98	2	5.277
2011-09-07	13.91	3	-7.4108
2011-09-08	13.9	4	-0.0719166
2011-09-09	13.99	5	0.645395
2011-09-12	13.68	1	-2.24079
2011-09-13	13.64	2	-0.292826
2011-09-14	13.55	3	-0.662011
2011-09-15	13.31	4	-1.78709
2011-09-16	13.31	5	0
2011-09-19	13.08	1	-1.74313
2011-09-20	13.08	2	0
2011-09-21	12.9	3	-1.3857
2011-09-22	12.53	4	-2.91015
2011-09-23	12.26	5	-2.17838
2011-09-26	12.26	1	0
2011-09-27	12.32	2	0.488203
2011-09-28	11.93	3	-3.21677
2011-09-29	12.1	4	1.41492
2011-09-30	11.75	5	-2.93522
2011-10-03	11.44	1	-2.67373
2011-10-04	11.26	2	-1.58594
2011-10-05	11.29	3	0.266076
2011-10-06	11.3	4	0.0885348
2011-10-07	11.25	5	-0.44346
2011-10-10	11.43	1	1.58733
2011-10-11	12.01	2	4.94982
2011-10-12	12.05	3	0.332502
2011-10-13	12.24	4	1.56446
2011-10-14	12.42	5	1.45988
2011-10-17	12.28	1	-1.13362
2011-10-18	12.27	2	-0.0814664
2011-10-19	12.01	3	-2.14176
2011-10-20	12.03	4	0.166389
2011-10-21	11.91	5	-1.00251
2011-10-24	12.05	1	1.16863
2011-10-25	12.04	2	-0.083022
2011-10-26	11.89	3	-1.25367
2011-10-27	12.3	4	3.39016
2011-10-28	11.95	5	-2.8868
2011-10-31	11.9	1	-0.419288
2011-11-01	11.75	2	-1.26852
2011-11-02	11.73	3	-0.170358
2011-11-03	11.99	4	2.19233
2011-11-04	11.96	5	-0.250522
2011-11-07	11.77	1	-1.60138
2011-11-08	11.8	2	0.254561
2011-11-09	11.6	3	-1.70944
2011-11-10	11.6	4	0
2011-11-11	11.5	5	-0.865806
2011-11-14	11.53	1	0.26053
2011-11-15	11.78	2	2.14508
2011-11-16	11.66	3	-1.0239
2011-11-17	11.46	4	-1.73015
2011-11-18	11.45	5	-0.0872981
2011-11-21	11.25	1	-1.76216
2011-11-22	11.3	2	0.44346
2011-11-23	11.01	3	-2.59988
2011-11-24	11.01	4	0
2011-11-25	11.01	5	0
2011-11-28	11.05	1	0.362648
2011-11-29	11.04	2	-0.0905387
2011-11-30	11.12	3	0.722025
2011-12-01	11.08	4	-0.360361
2011-12-02	11.17	5	0.808993
2011-12-05	11.08	1	-0.808993
2011-12-06	11.11	2	0.270392
2011-12-07	11.12	3	0.0899685
2011-12-08	11.13	4	0.0898876
2011-12-09	10.88	5	-2.27179
2011-12-12	10.92	1	0.366973
2011-12-13	10.99	2	0.63898
2011-12-14	10.8	3	-1.74396
2011-12-15	10.91	4	1.01337
2011-12-16	11.11	5	1.81658
2011-12-19	11.11	1	0
2011-12-20	11.22	2	0.98523
2011-12-21	11.31	3	0.798939
2011-12-22	11.4	4	0.792607
2011-12-23	11.41	5	0.0876808
2011-12-26	11.41	1	0
2011-12-27	11.79	2	3.27616
2011-12-28	11.83	3	0.338696
2011-12-29	11.69	4	-1.19049
2011-12-30	11.82	5	1.10592
2012-01-02	11.82	1	0
2012-01-03	11.98	2	1.34456
2012-01-04	12.01	3	0.250104
2012-01-05	11.8	4	-1.76401
2012-01-06	11.71	5	-0.765635
2012-01-09	12.05	1	2.86215
2012-01-10	12.06	2	0.0829531
2012-01-11	11.76	3	-2.51902
2012-01-12	11.59	4	-1.45613
2012-01-13	11.35	5	-2.09249
2012-01-16	11.35	1	0
2012-01-17	11.63	2	2.43702
2012-01-18	11.63	3	0
2012-01-19	11.76	4	1.1116
2012-01-20	11.64	5	-1.02565
2012-01-23	11.98	1	2.87912
2012-01-24	12.03	2	0.416494
2012-01-25	11.96	3	-0.583578
2012-01-26	12.04	4	0.666669
2012-01-27	11.99	5	-0.416147
2012-01-30	11.66	1	-2.79088
2012-01-31	11.81	2	1.27824
2012-02-01	11.98	3	1.4292
2012-02-02	12	4	0.166806
2012-02-03	12.16	5	1.32452
2012-02-06	12.17	1	0.082203
2012-02-07	12.15	2	-0.164474
2012-02-08	12.15	3	0
2012-02-09	12.11	4	-0.329761
2012-02-10	12.12	5	0.0825423
2012-02-13	12.35	1	1.87991
2012-02-14	12.38	2	0.24262
2012-02-15	12.44	3	0.483482
2012-02-16	12.41	4	-0.241449
2012-02-17	12.5	5	0.722605
2012-02-20	12.5	1	0
2012-02-21	12.54	2	0.319489
2012-02-22	12.56	3	0.159363
2012-02-23	12.59	4	0.238569
2012-02-24	12.61	5	0.15873
2012-02-27	12.78	1	1.33913
2012-02-28	12.89	2	0.857037
2012-02-29	12.99	3	0.772801
2012-03-01	13.02	4	0.230681
2012-03-02	13.13	5	0.841305
2012-03-05	13.05	1	-0.611155
2012-03-06	13.14	2	0.687288
2012-03-07	13.07	3	-0.534149
2012-03-08	13.17	4	0.762199
2012-03-09	13.15	5	-0.151976
2012-03-12	13.12	1	-0.228398
2012-03-13	13.26	2	1.06142
2012-03-14	13.29	3	0.225989
2012-03-15	13.51	4	1.64183
2012-03-16	13.55	5	0.29564
2012-03-19	13.46	1	-0.666422
2012-03-20	13.28	2	-1.34632
2012-03-21	13.38	3	0.750191
2012-03-22	13.31	4	-0.524542
2012-03-23	13.47	5	1.19494
2012-03-26	13.63	1	1.18083
2012-03-27	13.51	2	-0.884309
2012-03-28	13.48	3	-0.222305
2012-03-29	13.35	4	-0.969072
2012-03-30	13.83	5	3.53238
2012-04-02	14.01	1	1.29312
2012-04-03	13.99	2	-0.142857
2012-04-04	14.03	3	0.285511
2012-04-05	14.17	4	0.992916
2012-04-06	14.17	5	0
2012-04-09	14.13	1	-0.282686
2012-04-10	14.09	2	-0.283487
2012-04-11	14.05	3	-0.284293
2012-04-12	14.23	4	1.273
2012-04-13	14.19	5	-0.281492
2012-04-16	14.02	1	-1.20526
2012-04-17	14.06	2	0.2849
2012-04-18	13.89	3	-1.21647
2012-04-19	13.98	4	0.645858
2012-04-20	14.28	5	2.12322
2012-04-23	14.19	1	-0.632247
2012-04-24	14.44	2	1.74646
2012-04-25	14.57	3	0.896249
2012-04-26	14.63	4	0.410959
2012-04-27	14.78	5	1.02007
2012-04-30	14.99	1	1.41084
2012-05-01	14.87	2	-0.803755
2012-05-02	14.7	3	-1.14983
2012-05-03	14.58	4	-0.819677
2012-05-04	14.64	5	0.410678
2012-05-07	14.48	1	-1.09891
2012-05-08	14.21	2	-1.88224
2012-05-09	14.11	3	-0.706218
2012-05-10	14.49	4	2.6575
2012-05-11	13.88	5	-4.30098
2012-05-14	13.68	1	-1.4514
2012-05-15	13.96	2	2.02612
2012-05-16	14.05	3	0.64263
2012-05-17	14.21	4	1.13235
2012-05-18	13.93	5	-1.99012
2012-05-21	13.99	1	0.4298
2012-05-22	13.7	2	-2.0947
2012-05-23	13.52	3	-1.32258
2012-05-24	13.64	4	0.883658
2012-05-25	13.7	5	0.438918
2012-05-28	13.7	1	0
2012-05-29	13.76	2	0.437
2012-05-30	13.65	3	-0.802631
2012-05-31	13.38	4	-1.99785
2012-06-01	13.35	5	-0.224467
2012-06-04	13.31	1	-0.300075
2012-06-05	13.42	2	0.82305
2012-06-06	13.78	3	2.64721
2012-06-07	14.2	4	3.00237
2012-06-08	14.18	5	-0.140944
2012-06-11	14.16	1	-0.141143
2012-06-12	14.26	2	0.703733
2012-06-13	14.01	3	-1.76871
2012-06-14	13.79	4	-1.58277
2012-06-15	13.74	5	-0.363241
2012-06-18	13.82	1	0.580553
2012-06-19	14.29	2	3.34432
2012-06-20	14.41	3	0.836242
2012-06-21	14.32	4	-0.626525
2012-06-22	14.36	5	0.27894
2012-06-25	14.74	1	2.61183
2012-06-26	14.67	2	-0.476029
2012-06-27	14.65	3	-0.136426
2012-06-28	14.6	4	-0.341881
2012-06-29	15	5	2.70287
2012-07-02	15.06	1	0.399202
2012-07-03	15.42	2	2.36231
2012-07-04	15.42	3	0
2012-07-05	16.03	4	3.87966
2012-07-06	15.59	5	-2.78323
2012-07-09	16.31	1	4.51487
2012-07-10	16.4	2	0.550292
2012-07-11	15.92	3	-2.97052
2012-07-12	15.93	4	0.0627944
2012-07-13	16.16	5	1.43349
2012-07-16	16.57	1	2.50548
2012-07-17	16.63	2	0.361446
2012-07-18	17.13	3	2.9623
2012-07-19	17.61	4	2.76356
2012-07-20	17.9	5	1.63338
2012-07-23	17.31	1	-3.35163
2012-07-24	16.8	2	-2.99055
2012-07-25	17.23	3	2.52732
2012-07-26	16.8	4	-2.52732
2012-07-27	17.07	5	1.59437
2012-07-30	17.85	1	4.4681
2012-07-31	17.3	2	-3.1297
2012-08-01	17.13	3	-0.987519
2012-08-02	16.79	4	-2.00478
2012-08-03	16.83	5	0.237954
2012-08-06	16.32	1	-3.07717
2012-08-07	16.02	2	-1.85534
2012-08-08	16.18	3	0.993797
2012-08-09	16.7	4	3.16328
2012-08-10	16.8	5	0.597017
2012-08-13	16.43	1	-2.227
2012-08-14	16.48	2	0.303859
2012-08-15	16.84	3	2.16095
2012-08-16	16.77	4	-0.416543
2012-08-17	16.98	5	1.24446
2012-08-20	17.35	1	2.15563
2012-08-21	17.81	2	2.61676
2012-08-22	17.76	3	-0.281136
2012-08-23	17.53	4	-1.3035
2012-08-24	17.7	5	0.965094
2012-08-27	17.57	1	-0.737174
2012-08-28	17.56	2	-0.0569314
2012-08-29	17.69	3	0.737592
2012-08-30	17.85	4	0.9004
2012-08-31	17.78	5	-0.392928
2012-09-03	17.78	1	0
2012-09-04	17.71	2	-0.394478
2012-09-05	17.5	3	-1.19286
2012-09-06	17.47	4	-0.171576
2012-09-07	17.36	5	-0.631641
2012-09-10	17.16	1	-1.15876
2012-09-11	17.08	2	-0.467291
2012-09-12	17.53	3	2.60055
2012-09-13	17.54	4	0.0570288
2012-09-14	17.39	5	-0.858866
2012-09-17	16.57	1	-4.83015
2012-09-18	16.27	2	-1.82709
2012-09-19	16.61	3	2.0682
2012-09-20	16.07	4	-3.30507
2012-09-21	16.08	5	0.0622084
2012-09-24	16.01	1	-0.436274
2012-09-25	16.01	2	0
2012-09-26	15.6	3	-2.59426
2012-09-27	15.58	4	-0.128287
2012-09-28	15.88	5	1.90724
2012-10-01	15.46	1	-2.68044
2012-10-02	15.18	2	-1.82773
2012-10-03	15.19	3	0.0658545
2012-10-04	15.39	4	1.30806
2012-10-05	15.38	5	-0.0649984
2012-10-08	15.37	1	-0.0650407
2012-10-09	15.37	2	0
2012-10-10	15.09	3	-1.83853
2012-10-11	15.35	4	1.70832
2012-10-12	15.09	5	-1.70832
2012-10-15	14.79	1	-2.0081
2012-10-16	14.82	2	0.202634
2012-10-17	14.97	3	1.00706
2012-10-18	15.33	4	2.37635
2012-10-19	15.22	5	-0.720134
2012-10-22	15.35	1	0.850512
2012-10-23	15.42	2	0.454989
2012-10-24	15.58	3	1.03227
2012-10-25	15.52	4	-0.385853
2012-10-26	15.49	5	-0.193486
2012-10-29	15.49	1	0
2012-10-30	15.49	2	0
2012-10-31	15.35	3	-0.907918
2012-11-01	15.65	4	1.93554
2012-11-02	15.15	5	-3.24704
2012-11-05	14.96	1	-1.26206
2012-11-06	15.06	2	0.666225
2012-11-07	14.94	3	-0.800004
2012-11-08	14.84	4	-0.671594
2012-11-09	14.41	5	-2.94038
2012-11-12	13.95	1	-3.24429
2012-11-13	13.95	2	0
2012-11-14	14.09	3	0.998582
2012-11-15	13.95	4	-0.998582
2012-11-16	13.71	5	-1.7354
2012-11-19	13.83	1	0.871465
2012-11-20	14.03	2	1.43577
2012-11-21	13.98	3	-0.357016
2012-11-22	13.98	4	0
2012-11-23	13.98	5	0
2012-11-26	14.12	1	0.99645
2012-11-27	14.36	2	1.68543
2012-11-28	14.33	3	-0.209132
2012-11-29	14.34	4	0.0697593
2012-11-30	14.26	5	-0.559442
2012-12-03	14.41	1	1.0464
2012-12-04	14.42	2	0.0693722
2012-12-05	14.67	3	1.71885
2012-12-06	14.77	4	0.67935
2012-12-07	14.63	5	-0.952388
2012-12-10	14.66	1	0.204848
2012-12-11	14.63	2	-0.204848
2012-12-12	14.65	3	0.136612
2012-12-13	14.68	4	0.204569
2012-12-14	14.86	5	1.2187
2012-12-17	14.87	1	0.0672721
2012-12-18	14.6	2	-1.83242
2012-12-19	14.32	3	-1.93644
2012-12-20	14.03	4	-2.04593
2012-12-21	14.27	5	1.69615
2012-12-24	14.27	1	0
2012-12-25	14.27	2	0
2012-12-26	14.21	3	-0.421349
2012-12-27	14.16	4	-0.352485
2012-12-28	14.2	5	0.282088
2012-12-31	14.2	1	0
2013-01-01	14.2	2	0
2013-01-02	13.99	3	-1.48992
2013-01-03	13.92	4	-0.501613
2013-01-04	13.76	5	-1.15608
2013-01-07	13.98	1	1.58619
2013-01-08	14.02	2	0.285714
2013-01-09	13.99	3	-0.214209
2013-01-10	13.93	4	-0.4298
2013-01-11	13.85	5	-0.575956
2013-01-14	14.29	1	3.12748
2013-01-15	14.24	2	-0.350509
2013-01-16	14.46	3	1.53313
2013-01-17	14.42	4	-0.277008
2013-01-18	14.38	5	-0.277778
2013-01-21	14.38	1	0
2013-01-22	14.6	2	1.51832
2013-01-23	14.47	3	-0.894399
2013-01-24	14.45	4	-0.138313
2013-01-25	14.53	5	0.552106
2013-01-28	14.6	1	0.480605
2013-01-29	14.65	2	0.341881
2013-01-30	14.9	3	1.69209
2013-01-31	14.82	4	-0.538359
2013-02-01	14.87	5	0.336814
2013-02-04	14.99	1	0.803755
2013-02-05	15.01	2	0.133333
2013-02-06	14.95	3	-0.400535
2013-02-07	14.94	4	-0.066912
2013-02-08	14.61	5	-2.2336
2013-02-11	14.64	1	0.205128
2013-02-12	14.54	2	-0.685404
2013-02-13	14.56	3	0.137457
2013-02-14	14.27	4	-2.01186
2013-02-15	14.33	5	0.419581
2013-02-18	14.33	1	0
2013-02-19	14.78	2	3.09197
2013-02-20	14.9	3	0.80863
2013-02-21	14.96	4	0.401876
2013-02-22	14.68	5	-1.88939
2013-02-25	14.58	1	-0.68353
2013-02-26	14.54	2	-0.274725
2013-02-27	14.6	3	0.411806
2013-02-28	14.71	4	0.750601
2013-03-01	14.61	5	-0.682131
2013-03-04	14.76	1	1.02146
2013-03-05	14.83	2	0.473134
2013-03-06	14.83	3	0
2013-03-07	14.9	4	0.470906
2013-03-08	14.88	5	-0.134318
2013-03-11	14.94	1	0.402415
2013-03-12	14.84	2	-0.671594
2013-03-13	14.63	3	-1.4252
2013-03-14	14.54	4	-0.617074
2013-03-15	14.45	5	-0.620906
2013-03-18	14.28	1	-1.18345
2013-03-19	14.26	2	-0.140154
2013-03-20	14.37	3	0.768429
2013-03-21	14.65	4	1.92976
2013-03-22	14.57	5	-0.547572
2013-03-25	14.53	1	-0.274914
2013-03-26	14.61	2	0.549075
2013-03-27	14.69	3	0.546076
2013-03-28	14.2	4	-3.3925
2013-03-29	14.2	5	0
2013-04-01	14.06	1	-0.990808
2013-04-02	14.11	2	0.354988
2013-04-03	14	3	-0.782644
2013-04-04	13.91	4	-0.644932
2013-04-05	13.81	5	-0.721504
2013-04-08	14	1	1.36644
2013-04-09	14.18	2	1.27752
2013-04-10	14.15	3	-0.21179
2013-04-11	14.25	4	0.704228
2013-04-12	14.37	5	0.838579
2013-04-15	14.14	1	-1.6135
2013-04-16	14.36	2	1.54389
2013-04-17	14.48	3	0.832182
2013-04-18	14.57	4	0.619623
2013-04-19	14.51	5	-0.412655
2013-04-22	14.35	1	-1.10881
2013-04-23	14.29	2	-0.418995
2013-04-24	14.21	3	-0.561405
2013-04-25	14.49	4	1.95128
2013-04-26	14.56	5	0.481929
2013-04-29	14.9	1	2.30832
2013-04-30	14.81	2	-0.605858
2013-05-01	14.52	3	-1.97756
2013-05-02	14.44	4	-0.552488
2013-05-03	14.67	5	1.58025
2013-05-06	14.49	1	-1.23458
2013-05-07	14.68	2	1.30273
2013-05-08	14.76	3	0.54348
2013-05-09	14.97	4	1.41274
2013-05-10	14.88	5	-0.603017
2013-05-13	15.1	1	1.46767
2013-05-14	15.1	2	0
2013-05-15	15.07	3	-0.198873
2013-05-16	15.22	4	0.990434
2013-05-17	15.4	5	1.17572
2013-05-20	15.5	1	0.647251
2013-05-21	15.61	2	0.707171
2013-05-22	15.59	3	-0.128205
2013-05-23	15.35	4	-1.55142
2013-05-24	15.1	5	-1.64207
2013-05-27	15.1	1	0
2013-05-28	15.45	2	2.29143
2013-05-29	15.4	3	-0.324149
2013-05-30	15.31	4	-0.58613
2013-05-31	15.44	5	0.845533
2013-06-03	15.55	1	0.709909
2013-06-04	15.52	2	-0.193112
2013-06-05	15.54	3	0.128783
2013-06-06	15.52	4	-0.128783
2013-06-07	15.54	5	0.128783
2013-06-10	15.38	1	-1.03494
2013-06-11	15.6	2	1.4203
2013-06-12	15.59	3	-0.0641231
2013-06-13	15.32	4	-1.74705
2013-06-14	15.39	5	0.455878
2013-06-17	15.42	1	0.194742
2013-06-18	15.43	2	0.0648298
2013-06-19	15.57	3	0.903232
2013-06-20	15.31	4	-1.68398
2013-06-21	15.25	5	-0.392671
2013-06-24	15.43	1	1.17342
2013-06-25	15.53	2	0.645997
2013-06-26	15.57	3	0.257235
2013-06-27	15.64	4	0.448575
2013-06-28	15.65	5	0.0639182
2013-07-01	15.68	1	0.19151
2013-07-02	15.69	2	0.0637552
2013-07-03	15.8	3	0.698637
2013-07-04	15.8	4	0
2013-07-05	15.79	5	-0.0633112
2013-07-08	15.96	1	1.07088
2013-07-09	16.1	2	0.873368
2013-07-10	16.05	3	-0.311042
2013-07-11	15.98	4	-0.437091
2013-07-12	15.42	5	-3.56726
2013-07-15	15.65	1	1.48055
2013-07-16	15.76	2	0.700417
2013-07-17	15.71	3	-0.317763
2013-07-18	15.64	4	-0.446572
2013-07-19	15.82	5	1.14432
2013-07-22	16.03	1	1.3187
2013-07-23	15.2	2	-5.31665
2013-07-24	14.26	3	-6.3837
2013-07-25	13.7	4	-4.00626
2013-07-26	13.63	5	-0.512259
2013-07-29	13.53	1	-0.73638
2013-07-30	13.35	2	-1.33931
2013-07-31	13.42	3	0.522975
2013-08-01	13.32	4	-0.747947
2013-08-02	13.17	5	-1.13251
2013-08-05	13.19	1	0.151745
2013-08-06	13.03	2	-1.22046
2013-08-07	13.03	3	0
2013-08-08	13.3	4	2.05096
2013-08-09	13.26	5	-0.301205
2013-08-12	13.71	1	3.33735
2013-08-13	13.72	2	0.0729129
2013-08-14	13.83	3	0.798552
2013-08-15	14.09	4	1.86252
2013-08-16	13.97	5	-0.855315
2013-08-19	14.4	1	3.0316
2013-08-20	14.24	2	-1.11733
2013-08-21	14.32	3	0.560226
2013-08-22	14.13	4	-1.3357
2013-08-23	14.56	5	2.99778
2013-08-26	15.16	1	4.03823
2013-08-27	14.97	2	-1.26122
2013-08-28	15	3	0.2002
2013-08-29	14.96	4	-0.267023
2013-08-30	14.84	5	-0.805373
2013-09-02	14.84	1	0
2013-09-03	15.15	2	2.06743
2013-09-04	14.85	3	-2.00007
2013-09-05	14.96	4	0.738011
2013-09-06	14.97	5	0.0668226
2013-09-09	14.53	1	-2.98327
2013-09-10	14.51	2	-0.137741
2013-09-11	14.39	3	-0.830455
2013-09-12	14.83	4	3.01186
2013-09-13	14.43	5	-2.73428
2013-09-16	13.82	1	-4.31926
2013-09-17	13.67	2	-1.09132
2013-09-18	13.51	3	-1.17735
2013-09-19	13.56	4	0.369413
2013-09-20	13.17	5	-2.91828
2013-09-23	13.07	1	-0.762199
2013-09-24	13.04	2	-0.229797
2013-09-25	13.09	3	0.382702
2013-09-26	13.01	4	-0.613029
2013-09-27	12.99	5	-0.153846
2013-09-30	12.65	1	-2.65226
2013-10-01	12.65	2	0
2013-10-02	12.65	3	0
2013-10-03	12.65	4	0
2013-10-04	12.65	5	0
2013-10-07	12.65	1	0
2013-10-08	12.65	2	0
2013-10-09	12.65	3	0
2013-10-10	12.65	4	0
2013-10-11	12.65	5	0
2013-10-14	12.65	1	0
2013-10-15	12.65	2	0
2013-10-16	12.65	3	0
2013-10-17	12.73	4	0.63042
2013-10-18	12.72	5	-0.0785855
2013-10-21	12.84	1	0.938974
[truncated: 2,199 more rows]

## Sheet: Sugar
2010-12-31	27.57
[truncated: 2,930 more rows]

## Sheet: Wheat
2010-12-31	7.8
[truncated: 2,930 more rows]

[truncated: 13 more sheets: WTI oil, Healting oil, Gasoline, Feeder cattle, Lean hog, Live cattle, Copper, Gold, Silver, Platinum, Palladium, Aluminum, Nickel]
