# Supplementary material for: Response of commodity markets to global warming attention
Source: Research Square preprint supplement (doi:10.21203/rs.3.rs-4567325/v1), 2024-06-24
Supplement: Supplementary file 5 [file Commodity weekly prices.xlsx]

## Sheet: Price（周度价格）
周度价格	Cocoa	Coffee	Corn	Cotton	Oats	Orange juice	Soybean meals	Soybeans	Sugar	Wheat	WTI oil	Gasoline	Heating oil	Feeder cattle	Lean hog	Live cattle	Copper	Gold	Silver	Platinum	Palladium	Aluminum	Nickel
2011-01-07	2921.62	192.01	5.71	134.41	3.88	101.405	411	13.29	27.63	7.53	88.07	243.59	2.492	123.89	72.96	7.47	9433	1377.16	29.04	1735	754	2306	24200
2011-01-14	3052.09	196.49	6.24	137.11	4.07	98.367	435	13.85	29.8	7.55	91.53	250.44	2.637	126.68	74.75	7.71	9661.75	1359.45	28.25	1811	795	2271	25875
2011-01-21	3402.72	200.54	6.29	145.49	3.92	98.452	430	13.7	29.2	8.21	88.22	246.54	2.651	127.64	76.47	7.65	9459.5	1344.35	27.46	1817	814	2275	26160
2011-01-28	3403.69	205	6.18	160.64	4	94.19	421	13.61	31.23	8.22	88.15	245.66	2.685	125.55	79.12	7.61	9544.5	1329.55	27.95	1784	806	2305.25	26620
2011-02-04	3425.7	208.77	6.54	164.19	4.26	97.551	426	13.99	30.28	8.59	87.87	241.3	2.704	125.02	82.05	7.63	10064	1348.1	28.97	1838	813	2343.75	28350
2011-02-11	3439.85	211.71	6.82	179.91	4.21	93.62	426	13.84	30.02	8.71	84.39	245.9	2.693	127.12	85.88	7.62	9975.25	1366.4	29.96	1829	822	2339.75	28300
2011-02-18	3461.84	223.07	6.86	198.38	4.18	99.146	398	13.38	28.95	8.18	85.03	254	2.711	128.84	82.9	7.75	9867	1385.4	31.94	1836	847	2340	29150
2011-02-25	3583.57	220.93	6.63	172.66	3.65	102.677	390	12.88	27.92	7.56	96.52	291.55	2.949	128.83	83.91	7.71	9766	1408.7	32.95	1791	785	2345	28190
2011-03-04	3730.25	222.96	6.97	201.36	3.89	98.029	401	13.81	28.32	8.05	104.34	288.7	3.078	128.23	84.4	7.71	9886.5	1428.18	35.3	1828	811	2384.75	28800
2011-03-11	3553.31	224.23	6.34	195.77	3.51	94.919	381	13.01	26.7	6.85	101.14	282.75	3.014	129.55	85.47	7.85	9172	1409.94	35.82	1777	754	2375	25950
2011-03-18	3353.66	228.33	6.54	186.94	3.3	92.204	398	13.29	24.96	7.2	101.06	277.81	3.014	129.43	83.89	7.52	9512.5	1419.16	35.09	1720	727	2390	26750
2011-03-25	3266.33	224.55	6.65	203.87	3.44	91.285	386	13.29	25.98	7.44	104.89	289.35	3.048	131.52	85.28	7.87	9672.5	1434.43	37.54	1752	754	2384.5	27050
2011-04-01	3020.05	215.31	7.14	195.38	3.62	91.512	378	13.66	25.79	7.73	107.55	308.01	3.125	135.3	89.49	8.15	9343.25	1424.82	37.72	1773	772	2369	25600
2011-04-08	3076.42	225.41	7.47	203.37	3.69	92.737	370	13.64	25.07	8.07	112.27	318.38	3.313	136.14	91.61	7.87	9855.5	1470.68	40.4	1803	778	2454.5	27600
2011-04-15	3171.4	234.46	7.21	190.39	3.77	95.357	366	13.07	23.56	7.49	109.17	319.54	3.218	133.38	93.98	7.78	9384.25	1483.88	42.83	1787	772	2430	26155
2011-04-22	3141.09	240.5	7.17	170.44	3.83	95.642	368	13.58	24.09	7.98	111.72	324.09	3.184	132.26	94.9	7.83	9681.5	1504.05	45.86	1812	765	2504.75	26900
2011-04-29	3191.98	241.08	7.35	154.94	3.34	96.098	372	13.71	22.76	7.69	113.39	329.54	3.263	131.77	94.17	7.58	9296	1535.8	48.55	1835	777	2499.5	26850
2011-05-06	3092.09	237.04	6.63	146.76	3.2	95.348	368	13.07	20.89	7.47	96.87	307.27	2.848	129.35	92.05	7.35	8808	1495.12	35.72	1789	721	2419	24605
2011-05-13	3072.29	225.17	6.66	143.21	3.42	101.31	373	13.13	21.58	7.21	99.21	304.9	2.928	129.42	92.54	7.35	8769.75	1506.09	34.43	1774	718	2430	24400
2011-05-20	3027.57	218.04	7.48	154.89	3.59	99.915	376	13.67	22.27	8.07	99.15	286.23	2.9	126.9	95.97	7.11	9049.75	1507.7	35	1767	734	2355	23540
2011-05-27	3041.28	221.31	7.51	150.52	3.73	102.62	375	13.74	22.96	8.15	100.58	300.45	2.982	122.71	93.33	6.96	9188.25	1532.88	37.7	1786	757	2386.5	23090
2011-06-03	2939.26	224.31	7.48	163.74	3.75	101.453	377	14.08	23.78	7.77	100.28	292.31	3.054	124.32	91.83	6.84	9087.75	1538.33	35.89	1807	770	2360	22800
2011-06-10	3037.51	220.95	7.81	150.61	3.95	102.991	380	13.78	24.84	7.61	99.3	289.94	3.088	124.29	90.97	6.86	8923.5	1534.35	36.68	1829	810	2355	22850
2011-06-17	3017.29	210.4	6.97	145.47	3.61	101.538	357	13.3	25.6	6.81	93.02	282.7	2.973	126.88	94.55	7.23	9087	1537.9	35.66	1751	754	2336.5	21625
2011-06-24	3086.33	207.86	6.68	132.21	3.59	109.741	354	13.18	26.3	6.6	90.89	263.7	2.754	133.09	102.11	7.44	9036	1507.21	34.93	1696	739	2308.75	22150
2011-07-01	3193.97	220.95	6.25	131.42	3.44	106.579	349	13.17	26.43	6.14	94.81	288.3	2.908	135.08	101.44	7.4	9429.25	1485.05	33.92	1708	750	2328	23000
2011-07-08	3229.45	219.82	6.66	124	3.41	106.693	365	13.52	28.24	6.59	96.2	302.7	3.084	139.06	97.54	7.6	9644	1541.69	36.63	1740	776	2301.5	23890
2011-07-15	3196.88	210.81	7.29	113.82	3.7	107.12	378	13.91	27.78	7.93	97.24	307.53	3.119	139.44	95.08	7.31	9651.25	1589.57	38.99	1760	777	2275.75	24155
2011-07-22	3223.77	199.22	7.24	107.21	3.62	105.867	384	13.81	29.78	6.78	99.53	304.8	3.118	135.9	97.5	7.28	9654.5	1603.05	40.07	1793	807	2370.5	23975
2011-07-29	3050.07	199	6.95	105.72	3.61	108.516	375	13.53	28.44	6.67	95.68	301.97	3.086	135.33	102.26	7.27	9811.25	1623.56	39.95	1779	824	2391.5	24995
2011-08-05	2992.37	196.98	7.17	105.58	3.48	99.259	368	13.25	26.49	6.68	86.89	278.7	2.934	134.41	107.23	7.4	9016.5	1662.99	37.92	1709	742	2250	22505
2011-08-12	2946.2	203.01	7.2	96.42	3.6	91.398	366	13.26	26.87	6.81	85.19	279.85	2.903	133.73	107.34	7.56	8845.25	1729.7	38.88	1800	747	2289	21400
2011-08-19	3080.06	219.81	7.24	105.18	3.58	93.506	375	13.56	29.5	6.18	82.33	280.08	2.915	134.67	104.31	7.25	8804.5	1853.2	42.08	1855	750	2280	21205
2011-08-26	3088.81	226.88	7.63	100.21	3.83	91.94	382	14.09	29.1	7.36	85.37	290.95	2.987	132.44	99.75	7.18	9061.75	1778.9	40.17	1812	747	2298.5	21450
2011-09-02	3130.72	233.24	7.45	103.7	3.67	91.573	390	14.21	28.16	7.06	86.45	295.9	2.99	131.39	92.6	7.21	9056.75	1874.72	41.73	1873	785	2320.5	21500
2011-09-09	2979.47	219.46	7.2	109.46	3.58	95.084	379	13.99	27.68	6.72	87.24	285.86	2.973	132.07	87.08	7.45	8799.75	1856.68	42.1	1842	748	2288	21150
2011-09-16	2857.53	214.04	6.74	107.34	3.49	91.81	361	13.31	26.44	6.38	87.96	282.39	2.99	132.38	87.99	7.43	8671.25	1795.6	40.5	1798	732	2306.75	21510
2011-09-23	2692.25	193.12	6.2	94.42	3.42	87.383	361	12.26	24.86	6.02	79.58	258.74	2.79	131.93	90.89	7.29	7343	1676.97	32.35	1651	659	2207	18270
2011-09-30	2665.51	190.95	5.75	97.66	3.38	84.335	332	11.75	25.41	5.77	78.93	263.25	2.781	135.02	91.19	7.58	6998	1617.79	30.25	1511	614	2165	17600
2011-10-07	2698.63	190.28	5.9	98.63	3.3	86.613	324	11.25	24.39	5.8	82.7	278.75	2.853	135.89	93.5	7.65	7349.5	1652.18	32.18	1529	609	2205.25	18905
2011-10-14	2667.93	199.3	6.31	97.22	3.47	95.414	353	12.42	26.87	6.01	86.8	292.25	3.06	137.89	93.62	7.71	7532.5	1671.8	31.87	1553	614	2193.25	18875
2011-10-21	2674.31	200.69	6.49	94.19	3.42	96.952	351	11.91	25.64	6.21	87.19	275.02	3.018	139.47	93.94	7.62	7136.5	1636.32	31.23	1510	616	2116	18800
2011-10-28	2769.63	195.67	6.49	101.84	3.39	96.981	348	11.95	25.48	6.34	93.32	273.2	3.064	140.1	91.9	7.54	8169.5	1743.74	34.86	1629	659	2190	19700
2011-11-04	2715.88	191.52	6.5	95.73	3.37	98.194	348	11.96	24.82	6.38	94.26	273.77	3.067	142.02	89.94	7.84	7852.25	1754.9	34.15	1623.5	652	2090	18900
2011-11-11	2549.5	196.19	6.37	96.89	3.29	95.363	325	11.5	24.47	6.24	98.99	265.09	3.175	142.65	87.08	7.59	7620.5	1775.72	34.63	1628	651	2080	18075
2011-11-18	2479.63	195.43	6.09	94.2	3.05	97.978	327	11.45	23.52	6.13	97.67	250.01	3.027	142.77	83.89	7.54	7500.75	1724.4	32.09	1594	608	2030	17655
2011-11-25	2395.34	194.2	5.85	88.58	3	97.892	312	11.01	22.57	5.93	96.91	251.56	2.929	143.9	83.82	7.56	7206	1691.65	31.84	1529	572	1923.25	16950
2011-12-02	2252.72	194.77	5.84	89.21	3.35	98.433	315	11.17	23.11	6.26	100.97	266.93	2.976	144.38	86.32	7.61	7862.75	1746.81	32.76	1559	653	1988	17740
2011-12-09	2098.67	192.09	5.84	89.25	3.17	94.361	309	10.88	22.97	6	99.4	264.37	2.898	144.86	86.15	7.31	7792.5	1716	32.14	1496	670	1942	18600
2011-12-16	2135.53	183.28	5.75	83.06	3.14	93.221	308	11.11	22.73	5.89	93.55	252.81	2.788	144.24	85.55	7.24	7328.75	1593.94	29.44	1424	624	1905	18550
2011-12-23	2229.79	185.55	6.08	83.42	3.26	95.3	321	11.41	23.13	6.3	99.72	272.99	2.883	143.42	83.56	7.6	7631.5	1606.78	29.21	1414	631	1896	18505
2011-12-30	2145.22	185.55	6.46	87.34	3.21	96.269	321	11.82	22.94	6.32	98.83	269.4	2.917	144.2	81.77	7.54	7590	1574.57	28.26	1354	630	1972	18710
2012-01-06	2066.61	185.24	6.33	90.06	3.05	100.775	334	11.71	22.93	6.36	101.56	277.66	3.087	147.65	82.03	7.39	7569.25	1621.2	29	1410	632	1995.5	18750
2012-01-13	2306.16	190.44	5.9	89.06	2.99	102.814	327	11.35	23.4	6.11	98.69	277.39	3.048	150.51	84.16	7.5	7991	1634.15	29.85	1479	627	2065.75	19600
2012-01-20	2310.04	192.07	6.09	90.91	3.08	113.523	362.3	11.64	24.22	6.24	98.15	281.59	3.005	150.39	84.96	7.59	8207	1657.69	30.85	1517	669	2073.25	20450
2012-01-27	2446.25	186.14	6.49	88.03	3.16	114.583	370.45	11.99	24.19	6.59	99.47	294.93	3.088	153.07	86.76	7.61	8511.25	1731.49	33.75	1608	684	2113	21700
2012-02-03	2364.61	185.17	6.43	86.72	3.23	110.994	370.25	12.16	23.32	6.76	97.8	293.7	3.117	153.62	88.09	7.65	8539	1742.9	33.52	1630	711	2163	21305
2012-02-10	2202.25	186.82	6.32	83.09	3.33	102.392	367.1	12.12	23.91	6.48	98.68	300.1	3.187	153.73	87.7	7.59	8460.75	1722.2	33.61	1638	697	2158.75	20705
2012-02-17	2375.43	179.29	6.42	86.19	3.39	103.133	381.2	12.5	23.85	6.58	103.27	302.34	3.185	155.93	87.09	7.75	8169	1720.24	33.11	1638	697	2091	19625
2012-02-24	2394.92	180.05	6.39	82.06	3.36	104.813	380.2	12.61	25.24	6.56	109.39	315.14	3.303	156.5	87.54	7.72	8553	1777.8	35.47	1714	714	2203.25	20175
2012-03-02	2365.93	178.35	6.54	82.98	3.29	107.967	388.48	13.13	24.49	6.93	106.68	309.82	3.208	156.42	87.55	7.77	8577.25	1713.49	34.89	1704	713	2229.75	19475
2012-03-09	2438.22	169.38	6.45	83.37	3.08	105.514	391.05	13.15	23.13	6.67	107.4	309.65	3.252	156.36	87.45	7.5	8502	1709.99	33.58	1655	690	2176.75	19300
2012-03-16	2302.56	166.1	6.69	80.67	3.49	103.503	399	13.55	24.66	6.86	107.03	314.91	3.276	155.71	87.48	7.43	8531	1654.88	32.46	1677	703	2129.25	18900
2012-03-23	2348.5	160.09	6.44	82.91	3.48	92.452	397	13.47	24.8	6.8	106.43	327.64	3.187	154.05	87.35	7.3	8407.5	1663.2	32.15	1617	658	2037.25	18175
2012-03-30	2287.92	164.35	6.43	86.67	3.61	91.997	397	13.83	24.13	6.67	103.03	331.83	3.172	153.93	83.7	7.16	8474.5	1663.8	32.26	1640	651	2018.5	17825
2012-04-06	2171.74	162.34	6.58	81.53	3.65	90.174	418	14.17	23.98	6.57	103.29	330.16	3.163	152.22	82.68	7	8382	1632.78	31.61	1592	635	1987.5	18405
2012-04-13	2256.98	160.5	6.29	85.96	3.64	83.025	439	14.19	23.12	6.45	102.84	332.19	3.162	149.14	82.44	7.03	8045.75	1668.97	31.5	1600	643	1966	18310
2012-04-20	2337.56	159.94	6.13	84.41	3.53	85.816	454	14.28	21.82	6.68	103.58	308.92	3.134	150.18	82.65	7.02	8240	1641.59	31.65	1579	666	1986.25	17805
2012-04-27	2389.75	157.35	6.43	83.4	3.63	84.306	473	14.78	21.35	6.65	104.86	308.17	3.181	148.85	82.82	6.82	8564	1664.18	31.31	1573	677	1951.5	18100
2012-05-04	2366.47	156.67	6.46	81.19	3.65	70.952	480	14.64	21.2	6.24	98.49	287.85	3	147.85	81.7	6.98	8253.5	1638.1	30.13	1530	663	1962.5	17575
2012-05-11	2388.98	159.8	6.08	74.41	3.56	70.493	462	13.88	20.79	6.16	96.03	294.47	2.951	148.71	79.56	6.99	8103	1589.15	28.94	1466	605	1933.5	17195
2012-05-18	2348.33	161.98	6.64	69.39	3.59	59.227	471	13.93	20.98	7.17	91.51	283.34	2.832	148.38	80.81	7.15	7702	1595.28	28.67	1456	605	1951.5	16825
2012-05-25	2204.95	154.5	6.04	67.89	3.25	63.799	468	13.7	20.2	6.67	90.64	280.71	2.825	152.33	85.28	7.07	7671	1566.26	28.28	1423	590	1912	17050
2012-06-01	2150.95	147.15	5.79	65.32	3.01	64.796	450	13.35	19.69	6.13	83.17	262.34	2.637	152.3	84.05	7.05	7373	1611.34	28.65	1407	607	1883.25	16100
2012-06-08	2271.55	144.78	6.27	67.64	3.2	65.622	482	14.18	20.25	6.3	84.08	269.49	2.682	155.14	87.94	7.12	7283	1586.4	28.38	1417	613	1878	16925
2012-06-15	2317.31	141.21	6.17	71.85	3.21	62.204	466	13.74	20.51	6.22	84.03	268.25	2.651	153.89	93.13	6.9	7498.75	1627.49	28.64	1493	632	1833.25	16850
2012-06-22	2185.55	142.5	6.15	65.46	3.29	65.907	485	14.36	20.18	6.8	79.33	248.99	2.557	152.89	100.5	6.89	7317	1561.9	26.73	1435	608	1775	16575
2012-06-29	2368.34	153.22	6.67	65.94	3.49	69.353	497	15	21.44	7.47	85.04	259	2.723	147.66	102.65	7.08	7691.75	1597.36	27.48	1428	578	1785.5	16730
2012-07-06	2329	156.24	7.34	68.5	3.9	72.097	550	15.59	22.44	7.95	84.37	267.07	2.709	146.16	100.9	7.04	7534.5	1587.35	27.09	1450	577	1775.75	16150
2012-07-13	2295.95	161.21	7.68	64.36	3.86	69.143	563	16.16	22.97	8.31	87.15	279.55	2.799	143.17	99.25	6.9	7709	1591.84	27.31	1424	581	1793.5	16155
2012-07-20	2318.89	164.38	8.39	66.89	4.04	62.315	619	17.9	23.73	9.13	91.56	282.65	2.926	137.39	95.17	7.02	7543	1580.7	27.31	1408	577	1785.75	15950
2012-07-27	2413.5	156.93	8.12	66.16	3.83	62.347	590	17.07	22.67	8.67	90.13	276.74	2.889	134.18	96.12	7.02	7557	1616.65	27.48	1410	574	1765.25	15880
2012-08-03	2477.04	154.62	8.15	66.14	3.83	63.372	601	16.83	22.19	8.63	91.4	294.46	2.926	136.5	95.28	7.09	7440.75	1601.15	27.74	1390	573	1735	15610
2012-08-10	2513.49	149.22	8.06	71.42	3.96	60.695	596	16.8	20.96	8.58	92.94	298	3.017	136.89	93.59	7.14	7483.75	1621.55	28.12	1399	578	1745.25	15400
2012-08-17	2501.72	144.08	8.13	68.12	3.93	61.663	601	16.98	20.63	8.54	96	298.35	3.081	138.83	91.58	7.14	7532.5	1616.35	28.04	1455	592	1741	15630
2012-08-24	2437.19	145.63	8.21	71.89	4.01	67.189	625.35	17.7	20.04	8.52	95.78	304.28	3.102	140.18	87.86	7.07	7627.75	1669.2	30.55	1537	643	1784.25	16475
2012-08-31	2647.38	146.7	8.08	72.29	4	67.758	653.25	17.78	20.26	8.48	96.47	313.33	3.174	139.96	81.89	7.16	7606.25	1674.4	31.3	1517	623	1779.5	15950
2012-09-07	2710.02	145.2	8.07	71.67	3.96	72.57	653.45	17.36	19.75	8.83	96.41	335.91	3.144	141.8	75.56	7.17	7958.75	1737.06	33.58	1593	647	1879	16500
2012-09-14	2689.61	156.88	7.89	68.93	3.96	74.577	621.44	17.39	20.51	9.02	98.94	320.95	3.231	143.14	69.34	7.22	8362.6	1774.35	34.51	1697	702	2095.25	17775
2012-09-21	2583.55	152.47	7.52	69.98	3.78	70.854	587.1	16.08	19.88	8.92	92.64	325.15	3.122	142.37	68.1	7.13	8277	1772.07	34.63	1642	672	2005.25	18175
2012-09-28	2570.94	153.8	7.58	66.34	3.78	65.451	576	15.88	20.15	8.67	92.18	366.45	3.144	143.05	73.96	6.91	8211.5	1774.45	34.58	1668	642	1979.95	18475
2012-10-05	2437.09	149.86	7.46	66.92	3.81	65.793	550	15.38	21.48	8.16	89.87	327.73	3.163	143.72	78.68	7	8295	1785.47	34.69	1711	667	1952.25	18300
2012-10-12	2422.96	145.29	7.48	66.93	3.99	64.255	557	15.09	19.99	8.36	91.83	305	3.218	143.52	82.28	6.97	8131.75	1763.56	33.69	1678	650	1883.75	17075
2012-10-19	2530.64	144.7	7.61	72.73	4.04	64.512	554	15.22	20.13	8.52	90	277.32	3.13	144.8	83.74	7.05	8010	1734.53	32.12	1633	638	1857.75	16950
2012-10-26	2444.25	142.07	7.35	67.95	3.98	63.799	582	15.49	19.27	8.43	85.84	273.69	3.097	144.92	85.22	6.95	7819.75	1714.87	32.24	1561	604	1833	16005
2012-11-02	2494.07	140.39	7.38	65.83	3.9	60.657	580	15.15	19.4	8.52	84.9	261.56	2.958	144.7	83.52	6.93	7661.75	1681.35	31.34	1552	608	1823	15975
2012-11-09	2408.93	138.24	7.38	65.11	3.74	61.544	551	14.41	19.12	8.75	86.08	298.35	3.002	144.17	82.35	6.96	7568	1731.49	32.62	1559	612	1822.75	15950
2012-11-16	2439.9	135.36	7.26	69.54	3.75	67.229	524	13.71	19.19	8.28	86.62	289.04	2.986	143.48	80.76	6.94	7595.75	1713.1	32.43	1554	623	1882.5	15960
2012-11-23	2541.46	133.08	7.39	68.22	3.87	72.059	522	13.98	19.17	8.34	87.01	282	3.06	143.03	78.02	7.13	7761.5	1747.99	33.11	1584	657.5	1887.25	16620
2012-11-30	2528.86	134.44	7.49	69.11	3.89	70.578	546	14.26	19.38	8.34	88.54	276.9	3.036	146.24	79.42	7.02	7978.75	1717.96	33.64	1612	685	1999.75	17650
2012-12-07	2451.47	134.57	7.35	68.74	4.13	71.433	560	14.63	19.35	8.51	85.45	263.58	2.934	146.53	84.91	7	8012.25	1702.24	33.02	1600	698	1959.5	17225
2012-12-14	2472.34	128.67	7.31	70.29	4	78.696	563	14.86	19.12	8.04	86.32	269.02	2.976	147.22	83.51	7.07	8043.75	1696.66	32.34	1613	700	1944.71	17875
2012-12-21	2355.12	130.03	7.02	71.38	3.75	76.474	543	14.27	19.4	7.82	88.2	278.48	3.03	148.51	81.77	7.16	7807.5	1656.5	30.13	1533	675	1921.75	17350
2012-12-28	2298.02	132.79	6.94	71.76	3.68	72.059	536	14.2	19.54	7.67	90.66	282.62	3.054	147.46	82.08	7.16	7866.5	1656.21	29.93	1527	704	1907.25	17200
2013-01-04	2263.95	133.18	6.82	71.1	3.53	64.523	507	13.76	19.01	7.56	93.12	281.95	3.033	149.58	82.67	7.17	8055	1647.64	29.7	1557	689	1896	17355
2013-01-11	2298.29	136.9	7.09	70.86	3.6	64.559	483	13.85	19.39	7.66	93.6	274.99	3.018	150.82	84.18	7.04	8017	1659.9	30.23	1626	693.5	1856.75	17585
2013-01-18	2323.3	139.44	7.3	73.13	3.75	65.524	495	14.38	18.58	8.06	95.61	282.38	3.069	148.15	85.14	6.78	8035.75	1686.95	31.83	1677	722	1838.25	17550
2013-01-25	2216.09	133.67	7.25	77.42	3.86	65.224	495	14.53	18.52	7.94	95.15	290.4	3.075	145.17	87.78	6.83	7997.75	1662.6	31.27	1678	725	1800	17380
2013-02-01	2239.24	135.21	7.43	77.43	3.85	69.952	509	14.87	19.01	7.89	97.46	309.96	3.187	146.27	88.25	6.89	8254.5	1668.8	31.89	1687	745	1829.5	18625
2013-02-08	2257.42	132.03	7.19	75.93	4.07	68.698	510	14.61	18.26	7.95	95.71	307	3.266	145.43	90.48	6.85	8259.5	1667.85	31.53	1714	746	1845	18320
2013-02-15	2184.15	129.36	7.06	76.24	4.05	73.939	510	14.33	17.88	7.82	95.95	315.68	3.231	142.03	88.26	6.79	8172	1606.35	29.95	1676	754	1937	18380
2013-02-22	2174.52	132.23	7	76.91	4.14	73.626	510	14.68	18.23	7.51	93.12	311.38	3.117	140.62	84.54	6.7	7773.25	1573.47	28.48	1611	732	1909	16975
2013-03-01	2114.23	132.49	7.27	79.53	4.07	68.919	499	14.61	18.14	7.59	90.71	314.67	2.957	138.87	79.6	6.78	7673	1578.51	28.55	1579	721	1829	16605
2013-03-08	2149.08	134.33	7.22	80.89	4.15	75.357	494	14.88	18.76	7.23	92.01	294.8	2.994	138.64	77.96	6.64	7710.5	1574.59	28.96	1588	769	1868	16735
2013-03-15	2149.06	131.25	7.33	85.58	4.27	78.396	470	14.45	18.95	7.58	93.49	294.59	2.975	137.19	77.37	6.55	7724.5	1593.25	28.86	1593	774	1850	16900
2013-03-22	2198.15	129.3	7.4	83.18	4.29	77.699	466	14.57	18.34	7.49	93.41	287.7	2.893	135.06	75.87	6.57	7621.75	1608.38	28.66	1580	754	1825	17150
2013-03-29	2211.74	130.19	7.09	83.29	4.29	76.873	461	14.2	17.84	6.97	97.24	291.26	2.916	134.94	74.21	6.67	7509.75	1595.8	28.32	1576	770	1804.75	16660
2013-04-05	2176.25	131.83	6.44	83.63	3.89	83.395	461	13.81	17.79	7.08	92.76	266.26	2.82	140.27	78.01	6.59	7377	1565.99	27.08	1531	720	1777.5	15950
2013-04-12	2290.79	128.82	6.67	80.26	4.04	81.601	461	14.37	18.03	7.33	91.23	259.86	2.702	138.18	81.39	6.51	7374.9	1504.28	26.41	1514	715.5	1778.5	15850
2013-04-19	2358.09	133	6.55	80.24	4.04	83.708	460	14.51	18.03	7.33	88.04	271.62	2.624	134.53	81.59	6.53	6961	1403.55	23.19	1425	677	1795.5	15170
2013-04-26	2386.89	126.76	6.47	78.27	4.25	79.037	479	14.56	17.53	7.08	92.63	274.1	2.667	134.35	80.83	6.63	6998	1477.6	23.67	1483	681	1795	15205
2013-05-03	2433.57	130.18	6.88	80.7	4.21	81.897	485	14.67	18.06	7.34	95.25	272.76	2.731	135.67	84.54	6.63	7243.75	1467.85	23.81	1501	694	1735.5	15225
2013-05-10	2329.29	131.45	6.65	82.94	4.08	81.483	467	14.88	17.97	7.24	95.81	276.42	2.748	134.35	90.56	6.47	7355.5	1423.47	23.29	1490	702	1776.5	15360
2013-05-17	2330.1	128.01	6.85	81.06	4.03	80.642	489	15.4	17.41	7.07	95.72	281.04	2.786	135.4	92.51	6.42	7274.5	1364.24	22.31	1470	736	1771.75	14825
2013-05-24	2279.84	121.38	6.89	77.24	3.9	83.68	526	15.1	17.4	7.23	93.84	271.34	2.728	131.67	93.49	6.36	7269.75	1387.51	22.51	1455	729	1786.97	14805
2013-05-31	2233.85	121.26	6.95	75.77	3.83	86.129	526	15.44	17.1	7.31	91.93	266.3	2.652	130.81	94.04	6.42	7280.75	1392.74	22.25	1459	744	1798	14825
2013-06-07	2393.86	120.87	6.96	80.87	4.19	86.015	513	15.54	16.97	7.16	96.11	279.4	2.724	133.84	96.68	6.44	7198	1381.68	21.8	1505	754	1853	15050
2013-06-14	2279.81	116.22	6.86	87.55	4.28	83.879	502	15.39	17.28	6.99	97.83	284.45	2.84	136.14	99.77	6.38	7056.25	1386.8	22.06	1448	728	1823.5	14325
2013-06-21	2193.33	114.34	6.96	81.34	4.15	80.775	503	15.25	17.12	7.13	93.81	269.74	2.733	136.62	104.19	6.47	6785	1289.85	19.92	1365	672	1761.75	14075
2013-06-28	2200.44	114.99	6.97	81.77	4.06	73.312	512	15.65	17.01	6.57	96.36	264.87	2.72	137.73	103.42	6.6	6731	1215.43	19.42	1317	643	1777.5	13710
2013-07-05	2239.09	116.5	6.7	82.78	3.91	76.368	500	15.79	16.81	6.65	103.09	282.48	2.878	140.61	103.21	6.55	6782.5	1214.88	18.77	1327	669	1783	13305
2013-07-12	2282.58	116.49	6.83	80.81	3.91	79.277	498	15.42	16.59	6.95	105.85	306.3	2.907	142.4	103.08	6.56	6939.75	1279.94	19.84	1403	716	1793.5	13775
2013-07-19	2399.26	120.77	6.82	80.81	3.88	82.449	518	15.82	16.73	6.78	108	300.7	2.948	145.99	101.47	6.54	6908.5	1294.81	19.48	1422	743	1764.5	14160
2013-07-26	2374.03	119.22	5.95	82.1	3.73	82.028	518	13.63	16.83	6.69	104.76	297.13	2.858	145.63	100.36	6.56	6848	1318.27	19.71	1428	731	1766	13850
2013-08-02	2334.48	116.58	5.81	81.84	3.75	80.889	445	13.17	17.15	6.88	106.94	294.31	2.915	149.49	100.61	6.47	6989.5	1313.35	19.91	1436	730	1771.25	14000
2013-08-09	2506.39	121.36	5.81	85.27	3.97	76.445	449	13.26	17.32	6.43	106.04	288	2.897	150.24	101.49	6.57	7253.25	1311.1	20.47	1492	739	1778	14680
2013-08-16	2527.65	119.29	5.94	87.39	4.08	75.135	467	13.97	17.27	6.2	107.58	293.36	2.981	152.36	102.56	6.63	7371.75	1368.03	23.23	1524	762	1785.5	15000
2013-08-23	2498.22	112.62	6.3	79.96	3.83	77.243	498	14.56	16.79	6.23	106.48	300	3.004	155.59	99.43	6.61	7333	1396.31	23.78	1538	752	1762.75	14525
2013-08-30	2474.44	111.91	5.88	79.89	3.73	78.24	509	14.84	16.68	6.38	107.98	299.2	3.026	155.32	94.2	6.58	7077.5	1397.63	23.58	1514	727	1735	13800
2013-09-06	2602.38	112.79	5.46	79	3.51	75.969	521	14.97	17.11	6.23	110.62	291.71	3.06	156.36	91.45	6.51	7131.25	1387.18	23.83	1498	699	1776	13980
2013-09-13	2636.45	113.86	4.69	82.41	3.43	79.897	537	14.43	17.46	6.23	108.31	283.09	3.04	155.93	92.98	6.49	7010.5	1316.9	21.82	1441	700	1785	13875
2013-09-20	2650.92	110.08	4.44	81.55	3.37	72.156	502	13.17	17.52	6.3	104.7	274.13	2.929	156.89	97.46	6.54	7256.5	1337.97	21.96	1447	726	1786.5	14035
2013-09-27	2679.67	108.75	4.34	81.43	3.54	74.651	515	12.99	17.43	6.75	102.86	271.46	2.911	159.37	97.4	6.64	7286	1339.77	21.84	1416	725	1776.5	13985
2013-10-04	2655.77	109.52	4.19	83.83	3.54	73.54	547	12.65	18.38	6.69	103.83	265.85	2.942	159.92	96.38	6.64	7231.5	1311.09	21.61	1386	706	1792.5	14050
2013-10-11	2778.02	110.87	4.19	83.83	3.54	73.284	540	12.65	18.8	6.69	102.17	273.09	2.97	159.92	96.38	6.68	7177.25	1268.29	21.22	1369	712	1815	13920
2013-10-18	2751.76	108.09	4.21	80.01	3.67	67.815	532	12.72	19.23	7.16	100.87	272.12	2.986	159.92	96.38	6.62	7221.75	1316.31	21.92	1438	737	1790.5	14200
2013-10-25	2743.13	103.53	4.2	76.51	3.79	69.183	545	12.84	18.85	7.07	97.4	265.05	2.878	165.07	91.4	6.73	7178.75	1346.69	22.49	1440	733	1820	14580
2013-11-01	2679.56	100.54	4.13	75.71	3.65	70.831	524	12.51	18.09	6.93	94.56	260.37	2.878	165.11	89.17	6.68	7236.5	1309.9	21.87	1453	737	1795.5	14570
2013-11-08	2693.06	99.61	4.14	74.33	3.74	74.987	510	12.9	17.94	6.74	94.56	260.9	2.858	165.42	86.45	6.65	7166.25	1285.35	21.34	1446	757	1780	13915
2013-11-15	2760.38	101.09	4.08	73.87	3.75	78.948	522	12.72	17.5	6.59	93.8	272.68	2.929	164.96	84.7	6.69	7000.25	1287.74	20.79	1438	729	1767.5	13830
2013-11-22	2821.72	101.55	4.1	74.64	3.94	79.436	504	13.11	17.46	6.75	94.53	276.05	3.022	164.85	82.49	6.56	7098	1245.4	19.91	1396	721	1758	13560
2013-11-29	2815.27	104.3	4.09	74.74	4.21	80.347	546	13.13	17.23	6.84	92.55	267.83	3.021	164.63	80.97	6.69	7054.25	1253.35	19.65	1376	724	1762	13515
2013-12-06	2837.88	102.52	4.15	75.54	3.9	79.237	537	13.18	16.73	6.81	97.48	273.95	3.043	165.79	82.91	6.59	7119.75	1235.55	19.54	1367	741	1790	13760
2013-12-13	2817.85	109.44	4.05	79.86	3.95	82.626	536	13.22	16.4	6.58	96.27	263.9	2.956	167.8	81.15	6.59	7276.5	1236	19.68	1367	723	1799.75	14100
2013-12-20	2865.27	107.44	4.13	80.02	3.8	79.151	547	13.23	16.58	6.43	99.11	280.51	3.068	166.53	80.55	6.66	7248.5	1205.47	19.43	1328	700	1800	14420
2013-12-27	2859.87	107.44	4.1	79.78	3.88	78.752	547	13.25	16.57	6.39	99.94	283.15	3.124	164.14	79.23	6.7	7395.75	1216.15	20.04	1374	711	1805.5	14200
2014-01-03	2760.56	108.08	4.1	80.42	3.86	79.66	544	12.81	16.26	6.4	93.66	267.07	2.967	169.47	79.75	6.74	7330.5	1236.6	20.21	1404	728	1781	13845
2014-01-10	2778	112.14	4.17	79.4	4.3	84.43	506	12.92	15.74	6.01	92.39	269.33	2.967	171.6	80.82	6.79	7329.75	1246.4	20.1	1425	737	1782	13860
2014-01-17	2760.91	110.69	4.08	82.46	4.35	81.122	520	13.29	15.43	5.98	93.96	265.2	3.071	171.32	80.11	6.89	7373	1252.39	20.39	1447	747	1797	14695
2014-01-24	2852.93	109.46	4.17	83.56	4.24	81.715	504	12.89	15.33	6.02	96.66	269.36	3.2	170.34	80.46	6.92	7211	1267.13	19.8	1443	745	1800.5	14490
2014-01-31	2960.04	117.56	4.19	82.49	4.67	81.658	513	12.78	15.78	5.8	97.55	266.26	3.255	171.12	82.08	6.97	7096	1242.68	19.17	1382	707	1766.5	13980
2014-02-07	2987.82	125	4.29	82.83	5.12	84.221	530	13.24	16.02	6.04	99.98	278.36	3.067	169.63	83.81	6.93	7189.5	1262.93	19.93	1379	711	1763	14140
2014-02-14	3029.68	128.59	4.23	84.11	4.68	82.626	547	13.29	15.98	6.32	100.31	283.82	3.066	171.58	85.62	7	7180.5	1316.68	21.24	1426	740	1793	14250
2014-02-21	3006.37	149.33	4.38	82.71	4.94	83.537	545	13.65	17.03	6.41	102.53	287.02	3.06	170.77	89.28	6.99	7211	1319.93	21.72	1422.5	739	1824	14365
2014-02-28	3017.61	157.53	4.44	82.94	4.94	83.594	549	13.95	17.31	6.25	102.88	282.54	3.036	171.03	94.71	7.14	7080	1325.7	21.24	1455	746	1804	14720
2014-03-07	3042.58	169.52	4.64	86.61	4.91	88.246	539	14.48	18.25	6.77	102.82	280.38	3.004	172.48	102.31	7.08	6805	1335.84	20.99	1474	776	1853	15295
2014-03-14	3055.77	172.24	4.64	86.77	4.65	85.199	523	13.8	17.62	7.11	99.23	279	2.902	173.88	109.16	7.17	6492.5	1376.15	21.36	1478	780	1838	15740
2014-03-21	3029.48	153.33	4.57	87.2	4.35	86.699	544	14.06	17.23	7.2	99.97	274.83	2.842	173.93	118.46	7.06	6489.25	1335.1	20.38	1439	789	1855.5	16100
2014-03-28	3062.5	160.55	4.72	87.15	4.52	85.389	537	14.32	18.3	7.24	101.73	270.08	2.921	178.55	128.13	7.21	6685.5	1291.8	19.77	1401	771	1904	15710
2014-04-04	3044.78	162.35	4.82	85.16	4.6	87.24	515	14.75	17.81	6.93	101.16	275.64	2.862	178.09	130.35	7.01	6619	1305.61	20.15	1444	789	1880	16385
2014-04-11	3066.66	174.7	4.79	83.41	4.5	92.851	510	14.63	17.44	6.84	103.68	293.36	2.868	178.3	127.79	7.07	6664.5	1318.25	20.02	1454	794	1922.75	17400
2014-04-18	3090.48	171.02	4.76	85.42	4.49	92.766	522	15.12	17.34	7.08	104.33	298.2	2.939	178.95	123.08	6.99	6662.5	1298.9	19.64	1437	801	1882.25	17925
2014-04-25	3031.51	177.36	4.88	86.11	4.47	93.99	514	14.96	17.86	7.08	100.85	296.64	2.912	179.1	117.3	7.09	6783	1302.07	19.69	1418	805	1917	18445
2014-05-02	2999.03	175.42	4.78	87.11	4.63	91.341	528	14.79	18.15	7.28	100.09	289.24	2.844	179.56	115.12	7.2	6755.5	1302.57	19.57	1425	816	1887.5	18270
2014-05-09	2946.7	160.95	4.88	85.93	4.33	91.678	520	14.91	17.94	7.3	100.32	282	2.842	182.72	114.29	7.15	6795.5	1288.15	19.06	1429	804	1892.5	19905
2014-05-16	3003.28	161.75	4.65	83.29	4.01	88.875	535	14.78	18.62	6.76	102.31	288.35	2.881	184.25	112.73	7.13	6923.5	1293.93	19.35	1464	816	1898	19025
2014-05-23	3107.05	159.18	4.6	81.31	3.96	91.057	544	15.26	18.21	6.53	105.01	291.85	2.88	189.35	111.72	7.13	7021	1292.81	19.43	1483	828	1969	19600
2014-05-30	3149.45	155.2	4.52	79.82	4.12	91.997	534	15.07	18.21	6.29	103.4	285.2	2.814	191.43	110.83	7.17	6919	1244.66	18.73	1464	836	1974	19250
2014-06-06	3159.01	150.75	4.47	79.07	4.06	94.56	535	14.72	17.8	6.25	103.32	284.39	2.802	195.61	110.78	7.32	6696	1252.71	19.01	1453	840	1990	18875
2014-06-13	3202.58	153.95	4.38	79.16	3.85	94.845	504	14.34	17.93	5.94	107.49	290.92	2.908	198.91	113.69	7.57	6679.5	1274.03	19.63	1437	816	1980	18070
2014-06-20	3185.63	153.43	4.45	78.4	3.87	92.082	490	14.22	18.79	5.98	107.95	297.52	2.975	204.92	118.46	7.59	6840.5	1315.32	20.93	1456	829	1998	18400
2014-06-27	3214.66	152.84	4.36	75.55	3.76	84.677	498	14.39	18.22	6.15	106.46	292.49	2.89	213.37	124.65	7.88	6976	1319.39	21.11	1479	839	1991	18920
2014-07-04	3186.62	151.91	4.02	73.17	3.97	84.791	472	13.64	18.64	5.99	104.76	285.67	2.827	216.43	128.17	8.02	7161	1320.49	21.15	1503	866	1989.5	19400
2014-07-11	3172.65	145.14	3.73	70.32	3.87	85.672	435	12.67	18.32	5.38	101.48	278.98	2.74	214.58	131.63	7.61	7173.5	1335.4	21.5	1506	867	1977.25	19380
2014-07-18	3166.13	151.26	3.65	70	3.87	87.766	440	12.42	17.93	5.11	103.83	277.68	2.745	214.48	134.17	7.84	6987	1307.65	20.81	1497	881	1965	18660
2014-07-25	3234.54	157.69	3.58	67.68	3.87	85.816	462	12.61	18.28	5.13	105.23	278.1	2.804	214.13	131.19	8.04	7137	1299.05	20.52	1473	876	1988	19200
2014-08-01	3254.88	167.84	3.46	63.53	3.86	81.999	460	12.13	17.66	5.02	97.86	267.33	2.761	225.22	126.83	7.85	7088.5	1294.69	20.4	1462	871	1963	18405
2014-08-08	3279.08	157.82	3.49	64.16	3.82	82.199	460	12.47	17.33	5.2	97.61	269.8	2.778	222.33	122.22	7.62	7010.75	1311.32	19.96	1475	857	1983	18560
2014-08-15	3286.77	163.59	3.63	63.76	3.78	85.788	460	12.29	17.25	4.98	97.3	267.75	2.743	222.21	116.42	7.47	6891	1305.1	19.72	1446	878	2008.75	18670
2014-08-22	3242.24	160.68	3.69	65.89	3.88	83.993	460	12.72	17.01	5.04	93.61	273.22	2.733	218.18	107.19	7.45	7098	1278.3	19.43	1416	883	2059.25	18750
2014-08-29	3252.3	169.95	3.62	66.53	3.81	85.474	460	12.37	16.94	5.02	97.86	269.81	2.772	218.51	98.86	7.61	7008.5	1287.93	19.51	1424	898	2099	18800
2014-09-05	3137.46	168.21	3.43	65.27	3.81	85.117	442	11.3	16.67	4.72	93.32	275.95	2.71	224.28	95.45	8.05	6991.75	1266.67	19.09	1406	887	2129.5	19575
2014-09-12	3118.74	158.17	3.23	69.64	3.81	84.09	420	10.69	15.64	4.27	92.18	263.55	2.621	227.74	100.2	7.93	6866	1230.4	18.6	1360	829	2119.75	18400
2014-09-19	3296.53	153.64	3.03	64.39	3.81	81.954	402	10.25	15.18	3.69	92.43	270.73	2.609	230.28	104.74	7.92	6883.25	1217.48	17.94	1344	823	2082.5	17775
2014-09-26	3329.88	159.07	2.85	61.07	3.81	82.028	389	8.89	16.25	3.81	95.55	276.65	2.603	230.48	107.08	8.05	6766.5	1215.68	17.52	1304	802	2069	16980
2014-10-03	3095.64	174.57	2.8	62	3.9	81.003	387	8.82	16.69	3.34	89.76	259.25	2.535	236.42	109.73	8.28	6682	1194.02	16.9	1249	763	2077.5	16550
2014-10-10	3178.88	183.28	2.94	63.85	3.64	80.177	397	8.97	16.84	4.15	85.87	237.56	2.479	239.35	110.6	8.25	6703	1221.68	17.35	1256	784	2080.75	16375
2014-10-17	3154.98	176.8	3.09	63.26	3.67	78.268	411	9.27	16.88	4.33	82.8	235.79	2.412	243.32	109.1	8.21	6689	1233.27	17.28	1259	753	2089	15700
2014-10-24	3088.12	162.38	3.14	62.92	3.91	80.177	432	9.58	16.65	4.34	81.27	232.4	2.345	239.55	102.4	8.43	6762	1230.74	17.18	1254	784	2089	15010
2014-10-31	2958.08	162.08	3.39	63.79	3.69	79.094	457	10.22	16.33	4.49	80.53	227.7	2.369	239.95	93.03	8.27	6761.5	1165.69	15.91	1227	784	2084	15780
2014-11-07	2945.32	158.06	3.38	62.06	3.56	73.018	460	10.19	16.03	4.81	78.71	222.94	2.354	240.54	88.25	8.24	6790	1165.26	15.67	1198	763	2046	15425
2014-11-14	2862.71	164.68	3.53	58.24	3.44	75.021	447	10.13	16.18	5.35	75.91	216.4	2.262	239.83	88.16	8.44	6777.5	1172.75	15.9	1178	760	2022.5	15580
2014-11-21	2872.88	162.44	3.49	57.4	3.36	82.797	421	10.23	16.41	5.34	76.52	217.18	2.237	240.11	88.95	8.5	6785	1205.32	16.44	1230	794	2020	16625
2014-11-28	2899.92	160.17	3.55	58.66	3.06	85.531	461	10.39	15.91	5.67	65.94	200.19	2.006	240	88.85	8.38	6412	1181.97	15.6	1205	809	2007.25	16275
2014-12-05	2937.8	154.84	3.67	59.09	3.17	84.363	437	10.28	15.45	6.01	65.89	184.01	1.941	244.82	88.72	8.21	6515	1195.01	16.25	1231	806	1974.25	16800
2014-12-12	2902.37	149.74	3.77	59.38	3.32	85.132	437	10.4	15.34	6.13	57.81	164.12	1.862	236.9	88.44	8.06	6542.25	1222.88	17.13	1231	818	2014	16675
2014-12-19	3005.92	150.21	3.84	59.62	3.36	80.946	430	10.24	15.3	6.39	56.91	163.95	1.804	230.63	85.15	7.9	6452.5	1197.94	16.04	1197	795	1959	15600
2014-12-26	3010.11	145	3.9	60.69	3.29	80.177	438	10.4	15.05	6.17	54.59	157.07	1.767	225.6	80.59	7.93	6361	1193.51	16.11	1183	811	1851	15335
2015-01-02	2971.75	140.57	3.7	59.09	3.26	81.971	453	9.92	14.55	5.86	52.72	149.17	1.709	217.95	78.27	8.16	6321	1188.85	15.93	1193	791	1788	14830
2015-01-09	2989.09	155.09	3.74	59.15	3.22	81.082	432	10.37	15.19	5.68	48.35	133.61	1.653	235.22	77.61	7.94	6166.5	1218.78	16.44	1225	795	1827	15300
2015-01-16	2982.59	149.18	3.66	58.46	3.02	82.909	402	9.77	15.57	5.35	48.49	138.21	1.61	226.39	75.98	7.58	5768	1274.6	17.76	1262	757	1859.5	14780
2015-01-23	2819.72	143.95	3.68	56.83	3.11	83.253	406	9.6	15.48	5.35	45.26	136.72	1.583	220.45	74.11	7.41	5549	1292.43	18.33	1274	767	1845	14350
2015-01-30	2761.1	143.43	3.5	58.48	3.03	79.521	413	9.48	15.05	5.07	47.79	146.16	1.646	211.69	71.73	7.48	5541	1273.24	17.22	1221	775	1835.5	15165
2015-02-06	2859.43	147.58	3.66	60.49	3.08	77.613	413	9.61	14.63	5.33	51.66	154.33	1.784	210.65	68.88	7.47	5670	1233.61	16.65	1239	786	1821	15235
2015-02-13	2992.4	146.76	3.64	61.16	2.93	77.898	413	9.75	14.92	5.39	52.66	161.73	1.91	211.18	63.91	7.63	5754	1232.54	17.36	1201	786	1817	14645
2015-02-20	3013.09	137.58	3.67	62.99	2.97	74.423	414	9.92	14.44	5.16	49.95	165.1	2.061	210.58	60.4	7.48	5708	1206.68	16.38	1166	783	1810	13955
2015-02-27	3050.52	129.6	3.67	63.22	3.02	69.012	408	10.21	13.92	5.17	49.84	182	1.923	207.72	63.38	7.47	5924	1216.57	16.64	1177	808	1801.5	14095
2015-03-06	2974.18	128.6	3.65	61.2	3.17	66.306	386	9.72	13.76	4.84	49.61	169.12	1.738	207.66	68.09	7.62	5765.5	1175.47	15.86	1166	823	1799	14370
2015-03-13	2867.88	120.5	3.58	59.34	3.11	65.546	379	9.62	12.95	5.04	44.88	156.25	1.541	213.62	66.37	7.65	5882	1153.57	15.53	1115	791	1769.5	14135
2015-03-20	2838.43	131.59	3.68	61.14	3.03	65.366	362	9.6	12.98	5.35	46	160.89	1.546	213.97	63.56	7.87	6073.5	1184.75	16.82	1129	778	1705.25	14245
2015-03-27	2801.34	128.39	3.75	61.34	3.08	72.316	360	9.57	12.46	5.07	48.83	163.4	1.598	216.71	60.81	8.02	6078.5	1200.63	17.05	1138	748	1717	13285
2015-04-03	2817.78	129.28	3.7	61.71	2.92	71.262	363	9.76	12.95	5.36	49.13	161.01	1.549	219.89	59.68	8.04	6003.25	1197.25	16.68	1154	751	1777.75	13025
2015-04-10	2814.17	127.82	3.6	64.16	2.99	65.252	347	9.41	12.97	5.26	51.63	172.08	1.669	219.68	60.2	7.83	6056	1207.24	16.46	1171	777	1779	12625
2015-04-17	2868.87	129.81	3.64	62.01	2.88	65.651	352	9.59	13.34	4.94	55.71	182.22	1.78	219.47	62.98	7.99	6069	1204.28	16.27	1161	777	1795.25	12555
2015-04-24	2922.78	130.74	3.52	63.54	2.81	65.024	359	9.6	13.35	4.86	55.98	190.94	1.809	212.97	65.18	7.91	6031	1178.34	15.71	1128	774	1801	13195
2015-05-01	2929.38	126.92	3.47	65.63	2.66	68.098	357	9.6	13.57	4.71	59.1	194.68	1.853	218	68.16	7.85	6411.5	1173.09	16.02	1127	772	1805	13750
2015-05-08	2996.94	124.98	3.52	63.31	2.55	68.106	358	9.7	14.04	4.78	59.41	188.66	1.82	214.81	75.98	7.93	6391.5	1185.2	16.46	1140	798	1780	14300
2015-05-15	3172.39	127.55	3.55	64.34	2.78	64.238	358	9.48	13.48	5.08	59.73	196.99	1.879	220.4	81.04	7.98	6414.75	1221.99	17.56	1158	785	1734	13980
2015-05-22	3185.32	119.83	3.47	61.84	2.74	67.645	358	9.19	12.95	5.13	58.88	198.1	1.831	220.3	83.2	7.96	6156	1206.2	17.16	1143	769	1720	12710
2015-05-29	3140.19	118.94	3.39	62.41	2.7	66.363	350	9.3	12.62	4.78	60.25	201.12	1.822	222.66	82.2	8.1	6005.25	1189.97	16.73	1115	783	1707	12620
2015-06-05	3156.78	125.98	3.47	63.26	2.84	67.872	348	9.35	12.74	5.2	59.11	196.36	1.736	224.48	82.47	8.05	5927	1169.53	16.05	1092	751	1730	13175
2015-06-12	3202.84	125.21	3.4	61.7	2.9	70.009	355	9.41	12.43	5.01	59.96	207.02	1.753	226.4	81.91	7.95	5892.5	1182.34	15.9	1095	739	1777.75	13125
2015-06-19	3298.68	122.74	3.41	63.06	2.81	69.382	364	9.71	11.94	4.82	59.62	200.28	1.738	225.64	80.11	7.92	5642	1200.22	16.08	1085	718	1765	12710
2015-06-26	3352.21	126.56	3.7	62.36	2.91	69.895	372	9.97	12.32	5.46	59.41	196.01	1.736	230.18	78.62	7.87	5745	1171.01	15.78	1074	676	1777.25	12450
2015-07-03	3330.82	121.5	4.03	64.34	2.75	67.405	378	10.33	13.28	5.6	56.93	196.92	1.705	224.82	77.15	8.01	5744	1167.19	15.58	1082	685	1764	12000
2015-07-10	3347.08	119.78	4.09	62.51	2.85	68.245	386	10.29	13.25	5.46	52.74	199.39	1.62	221.44	78.66	7.82	5578	1161.2	15.53	1032	655	1753.25	11260
2015-07-17	3393.44	121.06	3.94	62.62	2.86	68.943	392	10.09	12.92	5.21	50.88	187.63	1.532	223.03	80.55	7.7	5459.75	1132.32	14.85	998	621	1714.5	11500
2015-07-24	3240.57	117.86	3.7	62.73	2.67	70.35	375	9.97	12.17	4.71	47.98	176.82	1.501	216.09	78.93	7.49	5246.5	1083.9	14.52	979	616	1715	11300
2015-07-31	3276.29	119.62	3.54	60.47	2.65	71.062	370	9.97	12.01	4.59	47.11	170.45	1.446	215.95	78.51	7.61	5221.5	1094.3	14.82	979	610	1696.25	11040
2015-08-07	3171.83	122.2	3.55	61.46	2.66	75.876	363	10.02	11.53	4.7	43.87	163.09	1.397	217.13	79.08	7.68	5164	1096.85	14.91	946	602	1683	10800
2015-08-14	3114	128.16	3.48	63.61	2.58	75.449	358	9.56	11.51	4.6	42.45	172.9	1.405	216.71	78.45	7.65	5157.25	1114.88	15.24	997	623	1693.75	10600
2015-08-21	3133.33	117.6	3.48	64.19	2.52	72.971	355	9.17	11.27	4.46	40.45	155.57	1.329	215.25	79.09	7.48	5063.75	1158.05	15.31	1028	610	1658.75	10200
2015-08-28	3145.6	116.09	3.46	60.95	2.47	74.024	350	8.93	11.67	4.2	45.29	152.43	1.447	209.85	78.68	7.44	5147	1135.48	14.46	1003	573	1696	10060
2015-09-04	3205.83	113.16	3.39	60.3	2.63	73.44	350	8.62	11.92	4.07	46.02	152.98	1.46	207.82	76.39	7.28	5131.75	1120.97	14.6	991	575	1686.5	9950
2015-09-11	3297.89	110.73	3.59	60.84	2.87	70.713	345	8.64	12.18	4.25	44.75	145.55	1.413	205.18	73.08	7.26	5390.25	1100.3	14.38	971	587	1697.25	10300
2015-09-18	3356.35	111.92	3.51	60.21	2.87	68.767	349	8.52	11.45	4.23	44.71	142.32	1.39	200.02	70.97	7.1	5272.5	1136.95	15.19	988	611	1700	9675
2015-09-25	3320.83	116.7	3.66	58.44	2.81	62.119	342	8.65	12.15	4.44	45.55	144.49	1.428	194.81	71.83	7.02	5042.5	1144.4	15.13	945	672	1679	9950
2015-10-02	3153.9	117.27	3.68	58.79	2.76	60.866	337	8.52	13.35	4.5	45.54	141.69	1.425	187.89	72.65	6.65	5111.75	1138.65	15.26	912	694	1693.25	10030
2015-10-09	3117.33	122.45	3.66	60.09	2.74	66.477	344	8.64	14.08	4.46	49.67	147.68	1.48	184.29	74.75	6.96	5310.25	1157.55	15.89	978	723	1685	10500
2015-10-16	3185.04	119.26	3.59	61.67	2.9	75.449	353	8.78	14.06	4.29	47.3	138.74	1.388	188.01	74.98	7	5303.5	1182.28	16.1	1007	703	1676.75	10590
2015-10-23	3199.82	113.48	3.66	61.01	2.8	76.246	351	8.75	14.03	4.27	43.91	135.42	1.364	192.8	74.27	7.2	5183.25	1163.05	15.85	1006	699	1655	10515
2015-10-30	3322.99	117.67	3.69	61.01	2.82	76.189	343	8.7	14.21	4.64	46.6	144.41	1.413	193.27	72.13	7.21	5129.5	1141.05	15.56	988	677	1610	10060
2015-11-06	3289.36	115.45	3.66	60.39	2.8	77.945	338	8.59	14.16	4.65	44.32	143.42	1.494	189.52	66.42	6.81	4993.5	1087.8	14.76	939	606	1575	9630
2015-11-13	3415.97	110.75	3.54	60.39	2.85	85.664	331	8.5	14.69	4.38	40.69	129.49	1.284	181.28	58.89	6.65	4828.75	1082.4	14.25	866	542	1590	9425
2015-11-20	3414.63	117.19	3.6	61.39	3.03	84.534	326	8.54	14.96	4.38	39.39	132.97	1.261	176.72	55.87	6.66	4605.5	1079.34	14.13	858	551	1577	8730
2015-11-27	3357.86	115.52	3.63	61.81	3.03	81.515	320	8.72	14.6	4.18	40.57	135.98	1.208	172.16	55.64	6.7	4591	1057.97	14.07	827	551	1604.25	8775
2015-12-04	3431.81	117.12	3.73	62.21	2.95	79.749	320	9.02	15.05	4.22	40	131.56	1.171	168.4	56.13	6.47	4611	1084.8	14.59	859	542	1603.5	8980
2015-12-11	3402.86	113.58	3.65	62.37	2.93	85.503	320	8.67	14.25	4.28	35.65	127.88	1.005	157.79	56.6	6.28	4701	1076.57	13.91	836	543	1591.75	8695
2015-12-18	3305.12	112.89	3.65	61.78	2.58	81.914	302	8.84	14.74	4.24	34.72	128.71	0.955	154.52	55.57	6.33	4685	1064.57	14.14	852	553	1593.5	8765
2015-12-25	3294.03	114.11	3.54	61.48	2.62	83.737	295	8.66	14.72	4.17	37.62	127.77	0.986	151.14	54.25	6.75	4690.5	1075.45	14.4	866	551	1604	8640
2016-01-01	3268.66	117.35	3.5	62.62	2.68	82.398	295	8.63	14.93	4.2	37.13	128.4	0.989	159.64	52.97	6.86	4705.75	1062.38	13.85	868	555	1599	8820
2016-01-08	3069.2	112.64	3.47	60.34	2.64	77.053	294	8.62	14.19	4.24	33.2	113.26	0.981	166.54	53.5	6.7	4482.5	1103.18	14.04	874	505	1593	8560
2016-01-15	2969.12	109.79	3.55	60.71	2.55	72.819	306	8.78	14.52	4.36	29.45	104.74	0.881	162.03	55.12	6.39	4327.5	1090.15	14	839	492	1566.25	8395
2016-01-22	2933.38	109.97	3.63	61.03	2.59	69.126	304	8.74	14.18	4.39	32.07	110.97	0.965	157.51	57.2	6.58	4449.25	1100.42	14.11	833	507	1543	8700
2016-01-29	2816.37	110.09	3.67	60.33	2.54	75.99	304	8.76	13.09	4.49	33.66	115.22	0.99	161.24	60.23	6.72	4570	1117.15	14.29	866	501	1534.5	8620
2016-02-05	2845.59	114.77	3.59	59.09	2.51	77.101	304	8.58	13.14	4.74	30.86	102.48	0.974	159.67	63.98	6.69	4633.25	1154.5	14.75	899	509	1550	8160
2016-02-12	2919.21	111.36	3.52	57.55	2.47	73.968	304	8.65	13.11	4.66	29.32	106.56	0.967	157.6	65.6	6.45	4506.75	1233.78	15.79	957	526	1599.25	7820
2016-02-19	2908.08	110.85	3.58	58.29	2.54	74.423	304	8.7	12.65	4.73	29.59	123.33	0.967	158.58	66.26	6.68	4624.25	1232.03	15.46	941	507	1564.75	8575
2016-02-26	2939.99	109.51	3.47	56.29	2.26	73.199	304	8.47	13.94	4.58	31.65	102.68	0.995	158.18	66.52	6.87	4714.75	1215.57	14.77	928	492	1560.5	8490
2016-03-04	3055.51	113.55	3.47	55.04	2.37	68.771	291	8.6	14.79	4.65	35.91	104.06	1.095	158.82	66.91	6.71	5036.75	1271.05	15.73	960	550	1564.5	9340
2016-03-11	3120.08	116.78	3.55	55.38	2.43	69.325	306	8.77	15.14	4.84	38.51	118.23	1.169	160.03	66.56	6.97	4986.5	1258.28	15.65	974	576	1571.5	8830
2016-03-18	3178.27	123.57	3.57	56.79	2.46	72.904	297	8.83	15.97	4.71	39.47	120.95	1.195	162.24	66.78	6.98	5074.5	1253.55	15.88	972	593	1560.5	8660
2016-03-25	3035.18	120.42	3.6	56.09	2.43	77.3	300	8.95	15.95	4.71	38.14	132.06	1.196	162.03	65.89	6.73	4977	1220.55	15.28	957	577	1586.5	8650
2016-04-01	2960.16	119.76	3.44	56.64	2.41	83.908	299	8.98	15.29	4.84	35.36	132.14	1.07	158.26	65.54	6.65	4859.75	1212.38	14.92	957	559	1582.5	8320
2016-04-08	2947.52	116	3.52	57.06	2.41	78.923	302	8.92	14.89	4.67	39.74	142.4	1.133	158.62	66.56	6.66	4663.75	1241.57	15.36	957	537	1550	8545
2016-04-15	3022.51	117.82	3.68	58.56	2.48	78.639	324	9.27	15.22	4.68	40.4	142.57	1.177	157.01	66.71	6.57	4828.25	1229.88	16.3	986	568	1552.5	8915
2016-04-22	3196.14	117.74	3.57	61.44	2.56	73.312	363	9.6	15.49	4.75	42.76	150.41	1.252	151.11	67.36	6.13	5043.25	1241.59	17.07	1028	611	1547.75	9090
2016-04-29	3281.13	117.21	3.75	61.7	2.59	73.17	368	9.97	16.36	4.89	45.98	157.14	1.328	144.3	69.81	6.19	5064	1292.34	17.9	1065	628	1549	9445
2016-05-06	3137.26	119.69	3.6	60.79	2.48	80.053	368	9.97	16.14	4.51	44.58	148.05	1.274	144.48	73.59	6.47	4825.5	1290.38	17.59	1072	604	1546	9065
2016-05-13	3040.45	123.69	3.75	59.13	2.47	82.854	397	10.29	17.04	4.57	46.22	155.77	1.332	146.21	76.05	6.52	4636	1270.99	17.12	1042	592	1543.5	8640
2016-05-20	3005.25	119.74	3.78	59.44	2.43	85.303	397	10.43	17.39	4.64	47.67	161.76	1.423	148.53	78.43	6.46	4588.5	1252.68	16.5	1025	567	1525	8500
2016-05-27	3077.58	117.66	3.95	62.63	2.51	83.452	397	10.52	17.72	4.78	49.36	163.69	1.422	146.09	78.6	6.42	4720.5	1211.9	16.28	984	546	1537.25	8420
2016-06-03	3115.69	121.74	4	61.09	2.51	90.43	397	11.04	18.77	5	48.69	158.31	1.41	147.21	76.68	6.54	4696.5	1239.88	16.38	979	554	1539	8495
2016-06-10	3168.02	127.65	4.04	63.44	2.6	95.671	397	11.49	19.74	4.85	49.09	153.36	1.437	148.91	79.76	6.57	4496	1273.59	17.28	996	554	1527.5	8925
2016-06-17	3108.4	129.64	4.18	61.82	2.6	95.443	439	11.35	19.89	4.75	48	144.33	1.374	144.01	82.19	6.26	4541.5	1287.05	17.36	968	531	1532.25	9065
2016-06-24	3044.66	126.3	3.67	63.41	2.62	96.839	423	10.84	19.18	4.59	46.7	144.4	1.381	141.27	84.02	6.18	4690	1313.88	17.82	987	548	1529.5	9020
2016-07-01	3023.37	132.99	3.38	62.91	2.68	101.534	444	11.48	20.45	4.26	49.02	145.33	1.436	143.81	84.91	6.3	4899.5	1335.97	19.54	1039	598	1529.5	9970
2016-07-08	3114.41	132.18	3.35	63.57	2.59	106.541	406	10.64	19.49	4.34	45.37	132.8	1.302	142.92	82.91	6.22	4697.75	1355.69	19.94	1082	606	1530	9880
2016-07-15	3105.28	135.12	3.36	71.81	2.72	104.367	406	10.63	19.29	4.26	45.93	138.69	1.288	143.67	81	6.13	4900.5	1327.57	20.14	1092	645	1545.25	10280
2016-07-22	2968.17	130.97	3.21	71.08	2.73	102.877	397	9.95	19.53	4.27	43.41	133.08	1.231	139.22	77.87	5.9	4911	1320.71	19.69	1092	684	1506	10410
2016-07-29	2912.89	133.52	3.22	71.34	2.63	99.687	385	10.16	19.12	3.93	41.54	132.25	1.177	142.49	74.47	6.21	4915.25	1349.09	20.33	1143	707	1547	10630
2016-08-05	3047.68	132.62	3.13	74.29	2.5	104.728	380	9.92	20.36	3.98	41.83	135.9	1.201	146.03	71.01	6.39	4779.25	1339.5	19.76	1146	699	1551	10715
2016-08-12	3029.46	129.03	3.08	69.66	2.34	104.044	375	9.99	19.87	3.99	44.47	135.81	1.298	147.95	68.2	6.33	4749	1353.43	20.16	1146	694	1556	10305
2016-08-19	3114.93	129.49	3.17	66.89	2.35	102.649	374	10.2	19.96	4.04	48.48	149.67	1.444	148.07	67.02	6.14	4785.75	1345.42	19.38	1106	711	1578.5	10355
2016-08-26	3041.12	131.57	3.01	66.25	2.39	105.753	363	9.84	20.73	3.7	47.64	142.15	1.427	144.3	66.61	6	4603.5	1334.07	18.72	1077	690	1579.75	9810
2016-09-02	2938.54	136.58	3.02	66.61	2.31	106.148	346	9.28	20.4	3.86	44.39	137.97	1.323	142.6	64.89	5.72	4616.5	1318.55	19.25	1052	670	1575	10060
2016-09-09	2807.16	137.08	3.16	68.07	2.28	111.928	351	9.9	20.32	3.9	45.88	142.37	1.337	138.29	64.07	5.77	4614.5	1333.94	19.41	1073	678	1560.5	10370
2016-09-16	2848.2	135.6	3.13	67.16	2.23	111.108	343	9.6	21.95	3.89	43.04	154.9	1.323	134.14	62.2	5.89	4771.5	1311.22	18.79	1012	656	1562.25	9725
2016-09-23	2875.97	138.49	3.1	70.22	2.27	113.443	340	9.37	22.29	3.91	44.36	141.75	1.338	137.14	58.93	5.71	4833	1339.71	19.8	1055	697	1563	10660
2016-09-30	2797.87	138.69	3.09	66.66	2.41	115.722	330	9.23	22.56	3.88	47.72	149.79	1.46	133.95	55.96	5.56	4848	1321.51	19.34	1034	722	1568.75	10575
2016-10-07	2775.59	137.24	3.12	66.5	2.63	111.564	333	9.25	22.62	3.66	49.76	147.33	1.51	126.95	52.99	5.65	4758.25	1253.36	17.23	975	674	1570	10200
2016-10-14	2695.09	142.07	3.32	68.08	2.71	106.836	334	9.3	22.24	4.05	50.35	154.14	1.49	121.92	52.3	5.35	4655.25	1253.45	17.4	933	642	1571.5	10485
2016-10-21	2680.21	143.99	3.32	68.54	2.86	113.159	333	9.51	22.05	4	50.61	157.41	1.496	119.48	51.85	5.61	4614.25	1266.05	17.44	927	619	1541.7	9960
2016-10-28	2695.23	150	3.35	68.26	3.07	121.418	342	9.71	21.59	3.96	48.72	152.35	1.468	124.67	51.22	5.76	4831.5	1270.03	17.67	972	616	1571.5	10430
2016-11-04	2589.08	153.41	3.31	67.34	2.97	124.128	336	9.5	21.16	4.08	44.07	149.86	1.351	126.46	50.46	5.6	4977.5	1303.82	18.42	1003	625	1562	10460
2016-11-11	2520.98	145.08	3.26	67.74	2.98	119.778	336	9.68	21.02	4.06	43.39	140.39	1.313	125.38	48.46	5.74	5540.75	1228.5	17.71	974	685	1582.75	11210
2016-11-18	2455.82	145.8	3.29	71.64	3.1	119.233	334	9.65	19.59	4.11	45.69	139.29	1.382	127.22	47.72	5.89	5412	1207.53	16.6	923	718	1550	10845
2016-11-25	2447.18	139.41	3.35	70.64	2.92	121.134	336	10.05	19.25	4.05	46.72	147.9	1.437	129.35	48.06	6.07	5864.5	1184.53	16.52	906	729	1554.5	11560
2016-12-02	2426.34	133.76	3.22	69.96	2.75	123.953	339	10.02	18.66	3.86	51.7	160.6	1.557	131.24	50.56	5.89	5758	1175	16.74	918	743	1560.5	11455
2016-12-09	2206.02	129.64	3.4	70.48	2.93	119.539	339	10.12	18.75	3.99	51.51	155.87	1.509	130.03	55.52	5.91	5822	1162.9	16.97	925	744	1563	11470
2016-12-16	2278.81	132.61	3.37	70.8	3	109.57	339	10.14	18.03	3.97	51.93	162.29	1.565	131.68	58.05	6.18	5629.75	1131.56	16.22	904	688	1565.5	11170
2016-12-23	2251.21	129.87	3.28	68.96	2.93	109.342	315	9.69	17.96	3.8	52.01	167.44	1.572	132.4	58.14	6.32	5455.75	1133.5	15.77	906	655	1546	10410
2016-12-30	2148.21	130.92	3.37	69.25	3.02	110.424	337	9.77	19.2	3.98	53.75	172.15	1.612	133.17	57.47	6.37	5523	1157.49	16.05	898	670	1546	10020
2017-01-06	2258.91	134.8	3.43	72.88	3.12	103.887	333	9.68	20.36	4.16	53.98	167.95	1.605	133.11	58.86	6.21	5569.25	1174.35	16.48	959	745	1543	10245
2017-01-13	2211.53	139.45	3.42	70.92	3.11	103.372	333	10.18	20.31	4.2	52.36	165.41	1.562	132.03	64.1	6.38	5883.75	1194.8	16.76	971	746	1599.25	10450
2017-01-20	2166.75	142.88	3.51	71.21	3.28	93.937	333	10.38	20.11	4.18	52.33	160.61	1.541	133.46	67.03	6.44	5730	1202.07	17.01	963	761	1610.25	9700
2017-01-27	2132.27	142.66	3.45	72.56	3.2	96.782	369	10.19	20.26	4.15	53.18	155.6	1.519	131.2	68.44	6.38	5883.5	1188.74	17.07	965	722	1603.75	9475
2017-02-03	2109.03	138.84	3.48	74.08	3.25	93.136	369	9.96	20.87	4.3	53.81	156.06	1.572	127.03	70.95	6.31	5763.75	1217.97	17.51	992	747	1590.5	10225
2017-02-10	1991.1	137.75	3.56	73.2	3.25	94.873	360	10.27	20.33	4.49	53.84	158.06	1.575	128.41	74.11	6.24	6082.5	1231.31	17.98	993	781	1641.75	10660
2017-02-17	2039.06	138.99	3.49	72.94	3	97.835	362	10.01	20.2	4.41	53.41	152.54	1.557	127.69	77.07	6.25	5945	1237.68	18.06	1010	793	1648	11050
2017-02-24	2023.13	136.1	3.45	72.39	3.13	94.019	352	9.82	19.73	4.31	53.99	154.53	1.591	127.06	76.72	6.26	5915	1255.34	18.38	1027	786	1644.25	10860
2017-03-03	1980.06	135.61	3.56	73.52	3.27	95.409	347	9.94	19.39	4.37	53.33	144.97	1.546	126.86	72.92	6.3	5905.75	1224.99	17.7	987	756	1706	10990
2017-03-10	1952.12	133.75	3.44	74.69	3.11	96.548	340	9.68	18.23	4.27	48.05	145.64	1.46	127.09	72.14	6.36	5716.25	1200.3	16.93	942	752	1695	9895
2017-03-17	2040.5	134.29	3.38	75.09	3.04	99.275	335	9.64	18.15	4.23	48.34	145.88	1.464	129.7	71.61	6.53	5916.5	1229.38	17.35	960	778	1723.5	10260
2017-03-24	2152.74	131.22	3.31	74.23	2.83	98.263	341	9.4	17.74	4.15	47.3	151.18	1.461	133.09	70.24	6.74	5777	1248.59	17.73	964	816	1684	9870
2017-03-31	2107.67	133.58	3.39	73.27	2.77	87.183	313	9.1	16.92	4.18	50.54	160.01	1.525	133.33	67.59	6.53	5816	1247.25	18.2	940	798	1694.75	10025
2017-04-07	2020.25	134.44	3.36	71.86	2.89	91.256	313	9.05	16.8	4.16	52.25	164.88	1.573	133.31	65.12	6.59	5798.75	1265.7	18.38	967	806	1700.5	10180
2017-04-14	1925.06	133.92	3.48	73.26	2.96	88.721	315	9.21	16.61	4.22	53.19	164.94	1.583	135.82	62.59	6.82	5660	1285.59	18.47	975	807	1678	9750
2017-04-21	1879.8	125	3.36	76.4	2.92	86.813	315	9.19	16.52	3.98	49.64	159.85	1.485	139.41	60.49	6.95	5594	1285.89	17.86	979	803	1718	9345
2017-04-28	1869.4	123.71	3.38	75.01	2.93	90.202	315	9.15	16.16	4.27	49.31	148.43	1.434	141.72	59.88	7.19	5710.5	1267.86	17.2	946	824	1697	9450
2017-05-05	1903.56	126.51	3.45	75.61	2.99	83.101	315	9.36	15.7	4.19	46.23	145.18	1.387	148.08	64.79	7.5	5563	1227.71	16.3	909	809	1676.5	9140
2017-05-12	2033.66	126.35	3.45	76.02	2.81	83.405	315	9.28	15.92	4.15	47.83	152.8	1.439	142.98	71.94	7.47	5538.75	1229.69	16.41	922	808	1656	9315
2017-05-19	2054.47	125.38	3.49	76.56	2.76	78.866	315	9.24	16.68	4.23	50.32	161.11	1.52	142.88	75.89	7.4	5665.25	1253.47	16.75	943	770	1655.25	9360
2017-05-26	1936.25	125.27	3.52	74.44	3.02	78.268	315	8.98	15.47	4.26	49.58	161.22	1.494	143.89	76.45	7.41	5638	1267.52	17.29	961	780	1655.5	9080
2017-06-02	2027.1	122.63	3.5	74.99	3.15	75.392	304	8.96	14.17	4.39	47.68	155.78	1.406	152.31	77.9	7.73	5640	1278.28	17.51	932	837	1640.5	8915
2017-06-09	2056.05	122.82	3.64	73.79	3.05	78.838	311	9.16	14.6	4.56	45.82	146.02	1.341	154.15	80.59	7.6	5779.5	1266.31	17.21	939	896	1625.5	8980
2017-06-16	2075.04	123.14	3.61	69.11	3.21	78.752	303	9.13	13.79	4.81	44.73	140.43	1.335	150.18	85.32	7.22	5639	1255.59	16.67	923	869	1595.75	8940
2017-06-23	1936.34	120.86	3.33	65.63	3.17	75.335	295	8.78	13.34	4.73	42.86	139.88	1.286	145.84	90.62	7.02	5780.5	1256.37	16.69	927	886	1594.5	9080
2017-06-30	1988.14	123.83	3.51	66.64	3.26	75.506	304	9.18	13.99	5.3	46.02	149.27	1.384	148.7	91.71	7.08	5927	1243.47	16.63	922	841	1625.5	9390
2017-07-07	1931.04	124.82	3.6	67.01	3.33	76.204	322	9.69	14.61	5.39	44.25	149.23	1.361	149.98	92.46	7.07	5804	1210.29	15.39	911	834	1640	8920
2017-07-14	1977.8	127.84	3.43	65.49	3.36	72.68	329	9.54	14.8	5.13	46.53	156.55	1.417	148.61	92.5	7.23	5905.25	1227.67	15.89	918	860	1645	9575
2017-07-21	2027.88	130.58	3.5	66.71	3.56	74.547	329	9.79	14.95	5.01	45.78	156.9	1.411	151.88	91.13	7.22	5971	1251.66	16.43	937	852	1615.5	9520
2017-07-28	2105.6	131.13	3.44	67.46	3.52	78.211	329	9.73	14.91	4.84	49.72	165.82	1.535	150.41	88.1	6.88	6295.5	1267.82	16.68	927	875	1627	10200
2017-08-04	2048.81	133.05	3.38	68.71	3.45	77.585	329	9.28	14.69	4.57	49.57	165.44	1.538	149.77	86.1	7	6347.75	1257.75	16.28	966	884	1683.5	10250
2017-08-11	2009.34	132.88	3.34	66.94	3.26	76.702	329	9.14	13.87	4.42	48.81	163.18	1.528	145.9	84.78	6.57	6383	1287.38	17.06	984	898	1715.75	10660
2017-08-18	1926.57	125.26	3.27	65.36	3.18	77.699	315	9.1	14	4.14	48.59	164.61	1.516	143.49	82.35	6.49	6452.25	1295.8	17.05	985	932	1780	10980
2017-08-25	1969.4	125.34	3.16	68.26	3.12	77.158	315	9.18	14.55	4.12	47.65	170.44	1.509	143.24	76.76	6.6	6648.5	1292.94	17.07	975	930	1795.25	11485
2017-09-01	1992.3	123.36	3.17	70.06	2.97	77.756	315	9.2	14.24	4.19	47.32	207.39	1.697	143.08	71.36	6.46	6804.5	1321.86	17.71	999	946	1825.5	12035
2017-09-08	1966.5	122.42	3.18	72.88	2.94	87.202	317	9.28	14.51	4.21	47.44	204.49	1.68	148.24	67.92	6.61	6672.25	1345.93	18.06	1014	942	1748	11590
2017-09-15	2030.19	128.93	3.11	67.84	2.98	84.791	317	9.42	14.98	4.42	49.9	184.25	1.703	150.09	62.8	6.56	6461	1322.07	17.68	976	924	1755	11090
2017-09-22	2006.34	126.35	3.17	66.89	3.1	83.395	315	9.55	14.47	4.38	50.33	174.7	1.71	152.6	57.66	6.84	6415.75	1296.03	16.97	935	916	1775	10420
2017-09-29	2050.42	121.57	3.19	67.44	3.1	84.534	315	9.27	13.95	4.18	51.67	163.65	1.798	154.3	54.29	6.68	6432.25	1283.83	16.76	920	935	1775	10500
2017-10-06	2100.93	122.33	3.14	66.87	3.07	89.348	315	9.27	14.12	4.14	49.34	163.21	1.67	155.35	56.42	6.81	6616.5	1271.67	16.82	911	943	1824	10600
2017-10-13	2108.43	120.32	3.16	66.14	3.22	86.329	314	9.53	14.51	4.28	51.43	169.13	1.675	155.66	60.24	6.83	6859	1299.57	17.33	941	996	1820.75	11675
2017-10-20	2134.16	119.79	3.11	65.24	3.3	88.408	314	9.37	14.12	4.14	51.63	174.47	1.727	154.69	65.23	6.8	6921.5	1282.44	17	919	976	1820	11735
2017-10-27	2108.5	120.44	3.15	66.61	3.23	87.639	314	9.33	14.67	4.22	53.92	183	1.783	154.93	69.09	7.01	6800.5	1269.69	16.72	917	972	1830.5	11580
2017-11-03	2064.12	117.59	3.15	67.09	3.25	89.12	314	9.35	14.49	4.33	55.63	187.86	1.791	159.46	68.95	7.4	6864.5	1267.8	16.83	922	995	1850	12725
2017-11-10	2212.71	118.78	3.1	67.5	3.3	91.864	314	9.36	14.97	4.42	56.75	189.94	1.835	159.38	67	7.04	6753.75	1276.33	16.87	937	1000	1848.5	12110
2017-11-17	2148.63	116.42	3.17	67.61	3.22	93.93	319	9.39	15.33	4.38	56.21	178.68	1.838	156.91	64.83	6.94	6743.5	1287.7	17.15	937	997	1845	11575
2017-11-24	2119.73	115.92	3.19	68.96	3.11	93.392	337	9.58	15.37	4.28	58.94	182.21	1.857	155.26	63.07	6.95	6980	1288.83	17.01	935	1001	1820	12035
2017-12-01	2046	117.3	3.27	70.65	3.08	92.623	338	9.58	14.95	4.38	58.35	177.36	1.85	156.69	63.92	6.81	6808.5	1282.96	16.41	934	1016	1859	11290
2017-12-08	1910.75	113.63	3.21	72.2	2.9	87.297	346	9.54	14.02	4.24	57.15	175.08	1.834	154.32	65.17	6.62	6536.75	1248.06	15.76	892	1009	1789	10950
2017-12-15	1898.1	112.6	3.16	73.13	3.02	82.313	344	9.33	13.58	4.23	57.29	168.88	1.82	152.62	63.18	6.64	6855	1254.69	16.02	882	1028	1785.5	11580
2017-12-22	1855.7	112.67	3.22	75.67	2.94	77.414	338	9.14	14.58	4.29	58.25	179.13	1.884	149.36	61.62	6.67	7085	1274.29	16.41	912	1028	1821	12130
2017-12-29	1899.06	115.88	3.23	76.36	2.93	77.955	330	9.19	15.07	4.32	60.46	182.92	1.993	156.02	62.23	6.81	7207	1303.46	17.01	927	1056	1806	12760
2018-01-05	1895.86	117.81	3.25	76.71	2.96	78.64	330	9.31	15.06	4.36	61.49	181.68	2.011	153.92	65.65	6.65	7078.5	1319.36	17.25	966	1095	1806	12525
2018-01-12	1929.37	114.1	3.21	79.96	3.01	77.841	330	9.22	14.32	4.25	64.22	188.55	2.034	145.84	71.15	6.52	7074.25	1331.02	17.08	991	1098	1780.5	12725
2018-01-19	1951.37	114.06	3.3	80.3	3.15	83.477	345	9.43	13.43	4.27	63.38	191.36	1.999	147.55	73.4	6.71	6999.25	1333.45	16.99	1011	1112	1810	12720
2018-01-26	2005.28	117.01	3.34	77.91	3.11	85.36	363	9.5	13.56	4.47	66.27	199.92	2.064	147.5	73.83	6.76	7042.5	1352.59	17.39	1017	1087	1819.5	13650
2018-02-02	2081.85	113.94	3.4	74.64	3.17	84.363	373	9.44	13.74	4.54	65.5	193.02	1.962	148.12	74.48	6.93	7003.75	1330.58	16.68	997	1047	1870.5	13435
2018-02-09	2063.97	115.35	3.38	74.24	3.2	84.306	392	9.47	13.64	4.57	59.2	175.72	1.783	147.63	74.72	6.83	6711.75	1313.27	16.25	969	969	1790.75	12970
2018-02-16	2152.74	112.96	3.46	72.91	3.14	85.389	419	9.85	13.35	4.65	61.89	179.11	1.835	148.15	72.09	6.99	7191	1356.19	16.73	1005	1037	1846.25	13920
2018-02-23	2209.04	113.21	3.45	75.73	3.03	82.768	419	9.99	13.57	4.62	63.52	185.35	1.881	148.3	69.32	6.82	7062.25	1328.38	16.54	990	1041	1851	13765
2018-03-02	2320.7	114.2	3.58	78.58	3.19	79.009	428	10.27	13.66	4.99	61.19	176.65	1.807	145.44	67.69	6.72	6863.5	1320.07	16.43	968	993	1855	13450
2018-03-09	2460.53	113.71	3.63	82.09	3.1	79.962	422	9.88	13.11	4.88	62.02	175.31	1.795	143.34	67.05	6.72	6937.5	1321.86	16.66	949	984	1850.75	13860
2018-03-16	2538.05	111.79	3.52	80.45	2.96	78.895	412	9.99	12.91	4.68	62.29	181.41	1.859	141.73	64.97	6.6	6864.25	1314.49	16.28	950	987	1840.75	13625
2018-03-23	2634.29	110.73	3.42	78.86	2.79	77.528	412	9.77	12.82	4.61	65.8	191.21	1.982	136.68	61.35	6.3	6617.75	1348.55	16.59	954	986	1817	12950
2018-03-30	2540.41	112.03	3.52	78.22	2.72	80.632	310	9.91	12.56	4.52	64.87	193.79	1.97	135.06	56.72	6.24	6679.25	1323.43	16.32	936	970	1805	13300
2018-04-06	2462.02	113.08	3.56	78.87	2.93	78.866	310	9.92	12.46	4.75	62.03	185.49	1.915	135.41	54.02	6.06	6729.5	1332.39	16.4	911	909	1797	13270
2018-04-13	2549.32	112.43	3.5	79.81	2.98	80.376	310	10.11	12.24	4.82	67.35	199.66	2.066	137.59	53.53	6.11	6796.5	1345.54	16.66	929	986	1863.5	13940
2018-04-20	2673.94	111.77	3.47	79.01	3	81.487	428	9.93	11.88	4.63	68.26	206.68	2.086	138.13	57.88	6	6951	1338.58	17.2	933	1031	1959	14830
2018-04-27	2741.37	114.66	3.63	80.55	2.91	87.639	310	10.09	11.51	4.9	68.11	208.1	2.105	139.31	62.2	6.18	6758.75	1322.49	16.48	911	983	1920	13885
2018-05-04	2734	115.45	3.77	80.14	3.07	92.224	310	9.96	12.07	5.22	69.71	206.81	2.13	138.1	63.29	6.25	6790	1310.91	16.46	901	963	1921	14025
2018-05-11	2757.91	111.34	3.68	80.3	3.13	96.502	310	9.67	11.82	4.94	70.69	213.57	2.199	136.12	64.65	6.23	6908.5	1321.46	16.76	926	1004	1926.75	14055
2018-05-18	2638.7	111.69	3.74	81.02	3.11	94.647	310	9.63	12.16	5.14	71.23	217.82	2.242	133.63	68.36	5.99	6825.25	1291.89	16.43	884	981	1833.5	14750
2018-05-25	2558.55	113.14	3.76	82.94	3.14	96.354	310	10.05	12.94	5.55	67.92	210.92	2.172	135.04	69.46	6.14	6865.25	1303.76	16.55	908	978	1899.5	14780
2018-06-01	2463.02	114.4	3.63	88.39	3.15	94.446	310	9.86	12.97	5.36	65.81	208.28	2.144	139.23	71.08	6.27	6882.75	1298.25	16.47	903	991	1850	15445
2018-06-08	2379.6	110.61	3.45	89.3	3.09	91.598	310	9.33	12.65	5.31	65.77	205.03	2.129	140.61	75.79	6.35	7324	1297.79	16.77	901	1015	1845	15420
2018-06-15	2474.5	109.36	3.32	89.58	3	92.082	310	8.7	12.48	5.15	65.01	195.93	2.052	141.28	82.86	6.3	7019	1281.08	16.59	898	995	1780	15185
2018-06-22	2480.28	109.72	3.32	81.64	3.12	93.193	310	8.64	12.48	5.11	69.02	201.1	2.092	142.28	86.2	6.38	6791.5	1269.52	16.41	867	956	1751.5	15265
2018-06-29	2476.76	108.68	3.26	80.91	3.13	91.341	310	8.28	12.35	5.17	74.13	211.66	2.168	142.67	82.97	6.35	6625	1251.13	16.15	851	953	1723.75	14900
2018-07-06	2435.77	107.94	3.27	79.44	3.14	96.104	310	8.43	11.99	5.32	73.78	207.11	2.142	146.48	81.92	6.52	6278.5	1254.84	16	838	947	1739.75	13945
2018-07-13	2473.27	106.31	3.1	85.21	3.01	96.121	376	7.84	11.48	5.13	71.03	206.57	2.098	148.27	80.34	6.35	6216.75	1242.19	15.86	831	944	1785	13975
2018-07-20	2306.67	107.61	3.24	84.1	2.97	97.539	385	8.16	11.64	5.24	70.31	203.75	2.068	148.49	76.9	6.53	6122.5	1229.14	15.5	824	892	1746	13530
2018-07-27	2235.64	107.06	3.31	85.33	2.99	93.99	385	8.38	11.56	5.36	68.66	214.3	2.129	149.2	72.17	6.5	6274.25	1224.03	15.54	829	930	1784.25	13860
2018-08-03	2081.92	105.71	3.33	84.88	3.11	96.725	385	8.56	11.45	5.61	68.49	208.93	2.102	149.74	66.04	6.58	6178.25	1219.63	15.52	832	920	1736	13550
2018-08-10	2082.42	105.22	3.22	83.47	3.18	93.05	380	8.15	11.26	5.44	67.61	206.48	2.115	151.12	58.28	6.44	6160.25	1214.99	15.33	828	911	1697.75	13820
2018-08-17	2118.42	100.89	3.33	78.34	3.11	89.633	380	8.4	10.84	5.55	65.93	200.71	2.071	149.66	51.51	6.45	5889.5	1179.16	14.68	779	895	1629	13480
2018-08-24	2308.5	100.78	3.11	77.94	3.17	89.12	380	7.93	10.86	5.19	69.71	210.94	2.171	150.85	47.79	6.31	6091.5	1207.49	14.88	786	932	1683	13415
2018-08-31	2281.3	98.63	3.13	78.71	3.08	87.981	380	7.81	11.17	5.05	69.84	203.74	2.215	149.98	45.44	6.43	5968	1202.84	14.54	792	979	1595	12800
2018-09-07	2214.13	98.8	3.24	77.67	3.07	89.312	380	7.91	11.57	4.76	67.73	206.52	2.193	152.64	47	6.47	5915	1198.42	14.22	776	982	1561.5	12355
2018-09-14	2176.97	97.8	3.03	77.91	3.03	87.457	379	7.64	11.79	4.76	68.98	203.4	2.182	153.38	53.48	6.68	5950.75	1196.72	14.15	805	987	1560	12655
2018-09-21	2141.84	98.26	3.1	74.79	3.19	84.118	386	7.77	11.44	4.81	70.8	207.96	2.197	157.34	60.85	6.71	6379.5	1198.05	14.34	829	1045	1505	13250
2018-09-28	2046.49	100.83	3.07	74.11	3.3	84.392	390	7.74	10.97	4.74	73.16	215.77	2.33	156.89	67.26	6.76	6263.5	1191.49	14.68	815	1094	1403.5	12600
2018-10-05	2047.21	105.96	3.24	72.39	3.53	81.829	401	8	12.74	5.01	74.26	216.97	2.368	158.15	69.36	6.74	6167	1201.98	14.61	824	1061	1435	12620
2018-10-12	2154.34	112.75	3.26	74.76	3.52	81.772	344	7.9	13.18	4.97	71.41	202.38	2.307	156.26	68.75	6.61	6319	1218.88	14.6	838	1084	1434.5	12655
2018-10-19	2156.99	115.98	3.27	74.31	3.55	80.917	344	7.89	13.99	4.94	69.16	199.06	2.292	155.37	66.43	6.64	6228	1226.52	14.63	835	1086	1364	12450
2018-10-26	2235.95	115.45	3.33	75.03	3.51	78.639	344	7.77	13.91	4.95	67.58	190.09	2.287	153.56	64.16	6.72	6207	1241.8	14.75	825	1093	1392.5	11900
2018-11-02	2257.52	115.9	3.38	75	3.46	78.684	344	8.17	13.53	5	63.12	176.32	2.153	153.55	64.08	6.66	6319	1231.35	14.81	866	1114	1350.5	11930
2018-11-09	2227.39	111.24	3.39	74.3	3.52	77.676	344	8.22	12.87	4.94	60.19	167.81	2.143	150.59	61.87	6.51	6078.5	1210.72	14.15	858	1122	1363	11470
2018-11-16	2192.96	109.45	3.34	72.54	3.52	78.211	344	8.36	12.83	5.3	56.49	164.81	2.064	147.09	58.51	6.59	6223.5	1220.92	14.36	842	1178	1385.5	11360
2018-11-23	2095.57	106.26	3.31	74.07	3.52	80.689	344	8.27	12.58	5.22	54.41	157.4	1.961	149.86	57.44	6.68	6236.5	1223.22	14.3	838	1141	1375.5	10915
2018-11-30	2154.66	104.4	3.42	74.04	3.51	81.686	344	8.49	12.95	5.34	50.78	151.13	1.817	147.92	56.36	6.68	6227	1219.15	14.18	805	1205	1380	11200
2018-12-07	2178.88	101.75	3.52	75.66	3.51	81.116	344	8.74	12.97	5.38	52.76	155.39	1.869	144	56.12	6.72	6149	1245.81	14.59	789	1208	1429	10910
2018-12-14	2189.57	99.07	3.5	74.98	3.54	78.724	344	8.47	12.75	5.55	51.26	149.9	1.833	146.2	55.13	6.8	6127.75	1238.7	14.62	784	1233	1413	11080
2018-12-21	2231.17	98.59	3.49	70.63	3.38	73.284	344	8.39	12.43	5.46	45.38	136	1.713	147.13	53.32	6.8	5967.5	1259.93	14.67	790	1242	1418.75	10875
2018-12-28	2346.69	99.86	3.46	67.63	3.36	71.917	344	8.24	12.46	5.43	45.15	136.77	1.643	147.26	53.11	6.91	5987	1277.53	15.33	788	1270	1400	10730
2019-01-04	2315.36	100.43	3.57	66.4	3.36	70.328	344	8.62	12.04	5.49	47.76	140.79	1.753	145.6	54.5	6.77	5897.25	1282.97	15.76	800	1269	1402.5	11110
2019-01-11	2309.59	102.25	3.52	68.42	3.36	69.2	344	8.57	12.89	5.51	51.44	145.28	1.85	144.65	57.21	6.91	5920	1290.3	15.65	822	1327	1407.5	11460
2019-01-18	2265.57	102.34	3.55	69.64	3.36	68.482	344	8.56	13.16	5.48	53.6	147.41	1.883	142.05	58.07	6.99	6029.5	1283.55	15.42	801	1375	1418	11820
2019-01-25	2201.22	103.45	3.54	69.88	3.36	68.527	344	8.67	12.59	5.51	53.53	142.11	1.855	143.66	58.22	6.95	6037.5	1298.59	15.7	812	1331	1449	11965
2019-02-01	2166.36	102.35	3.53	69.07	3.43	69.752	344	8.61	12.69	5.54	55.29	146.33	1.881	141.01	57.41	6.97	6115.75	1317.94	15.95	825	1368	1465.5	12660
2019-02-08	2204.32	102.35	3.51	67.98	3.41	69.04	344	8.58	12.74	5.51	52.75	149.24	1.876	141.73	56.14	7.04	6190.75	1314.26	15.79	799	1394	1490	12570
2019-02-15	2304.83	100.12	3.51	66.18	3.37	65.622	344	8.53	13.09	5.34	55.58	162.92	1.987	141.31	54.74	6.98	6193	1315.3	15.66	788	1437	1467	12400
2019-02-22	2286.86	99.16	3.52	67.33	3.35	69.41	344	8.61	13.39	5.17	57.01	167.2	1.993	140.42	53.13	7.09	6519	1330.09	15.95	830	1482	1474	12990
2019-03-01	2221.08	99.61	3.41	68.24	3.22	66.171	344	8.53	12.92	4.8	55.76	177.62	1.962	139.59	51.93	7.17	6525	1303.67	15.32	863	1553	1459	13195
2019-03-08	2197.53	98.44	3.35	67.88	3.26	66.505	344	8.4	12.43	4.66	55.77	173.55	1.974	139.28	51.98	7.1	6423	1298.26	15.36	818	1509	1440	13090
2019-03-15	2203.98	97.68	3.42	68.76	3.44	72.19	344	8.44	12.74	4.9	58.51	183.3	1.946	137.5	56.54	7.16	6445.75	1302.04	15.32	831	1555	1448.75	12930
2019-03-22	2152.52	96.23	3.52	71.64	3.51	74.053	344	8.5	12.79	4.93	58.87	190.3	1.939	141.8	62.41	7.32	6314.5	1312.6	15.42	853	1554	1450.5	12995
2019-03-29	2249.69	96.77	3.31	72.19	3.3	68.926	344	8.26	12.71	4.88	60.19	183.06	1.95	142.42	71.72	7.02	6486.5	1295.72	15.17	850	1390	1430.5	12984
2019-04-05	2362.78	95.65	3.39	72.79	3.5	68.414	344	8.48	12.94	5	63.1	199.23	2.019	143.3	78.68	7.07	6385.25	1292.3	15.14	903	1352	1380.5	13071
2019-04-12	2383.61	93.45	3.4	72.65	3.4	61.977	344	8.46	12.97	4.98	63.86	204.68	2.043	142.99	79.57	7.12	6463.5	1292.28	15.02	899	1365	1344.5	13022
2019-04-19	2339.01	93.29	3.38	72.81	3.52	62.746	344	8.31	13	4.78	64.02	209.22	2.048	145.97	81.54	7.21	6460.75	1275.31	15.01	890	1395	1345	12672
2019-04-26	2302.57	94.05	3.33	72.24	3.61	58.986	344	8.07	12.63	4.69	63.29	207.66	2.016	145.19	83.46	6.82	6398.75	1287.52	15.07	889	1431	1360	12424
2019-05-03	2337.88	91.4	3.44	69.91	3.47	53.893	344	7.86	12.58	4.63	61.98	197.05	2.047	137.41	82.82	6.73	6229.25	1281.04	14.94	855	1359	1341	12179
2019-05-10	2273.48	91.92	3.28	66.49	3.42	55.192	344	7.57	12.28	4.54	61.65	193.65	2.031	135.39	83.04	6.6	6108	1287.27	14.81	857	1312	1353	11921
2019-05-17	2283.88	89.84	3.59	61.26	3.54	57.087	344	7.69	12.14	4.96	62.77	198.02	2.068	131.82	84.59	6.62	6033	1276.5	14.44	823	1316	1430	12013
2019-05-24	2374.88	94.3	3.82	62.85	3.55	59.328	344	7.78	12.27	5.22	58.4	187.51	1.957	136.55	83.31	6.57	5932	1283.77	14.58	800	1329	1320	12355
2019-05-31	2341.47	103.25	4.04	63.91	3.63	63.401	344	8.29	12.62	5.38	53.49	172.7	1.809	133.05	81.28	6.43	5806	1300.11	14.59	791	1370	1310	12017
2019-06-07	2394.07	100.72	3.95	60.52	3.5	62.034	344	8.08	12.97	5.34	53.95	167.7	1.796	132.26	79.95	6.39	5777.75	1345.85	15.04	804	1356	1248	11617
2019-06-14	2423.38	96.55	4.4	61.76	3.55	60.553	338	8.58	13.15	5.74	52.47	170.11	1.796	133.55	79.27	6.41	5797.75	1350.18	14.93	806	1447	1300.5	11864
2019-06-21	2443.49	98.11	4.34	59.02	3.34	58.844	327	8.66	12.71	5.59	57.35	184.61	1.886	131.47	78.65	6.28	5957.5	1393.47	15.32	803	1500	1194.5	12090
2019-06-28	2391.52	105.25	4.16	60.04	3.28	59.271	325	8.66	13.27	5.53	58.2	191.25	1.896	133.44	77.26	6.44	5982	1412.3	15.32	818	1524	1216	12690
2019-07-05	2411.15	105.96	4.37	60.53	3.35	58.483	316	8.43	13.02	5.13	57.06	191.9	1.862	134.37	71.92	6.53	5890.25	1394.93	15.01	825	1574	1200	12480
2019-07-12	2459.66	103.22	4.57	56.65	3.28	59.84	324	8.89	13	5.22	59.99	196.07	1.949	140.46	70.73	6.61	5928.75	1407.99	15.17	818	1554	1235	13470
2019-07-19	2419.56	103.86	4.36	56.75	3.28	60.735	318	8.76	12.32	4.99	55.42	183.18	1.867	138.16	73.27	6.55	6055.25	1429.33	16.13	854	1534	1290	14730
2019-07-26	2373.29	99.08	4.14	58.74	3.14	59.926	315	8.59	12.73	4.81	56.04	186.61	1.874	141.5	80.36	6.63	5941	1419.49	16.41	865	1531	1310	14100
2019-08-02	2302.18	97.19	3.98	53.76	3.14	58.388	306	8.28	12.74	4.95	55.67	178.36	1.837	141.62	84.68	6.52	5703.75	1445.94	16.31	841	1389	1290	14450
2019-08-09	2194.12	97.04	4.07	54.36	3.14	59.784	312	8.49	12.64	4.99	54.41	167.85	1.77	141.66	81.75	6.49	5732	1502.47	17.01	863	1432	1252	15550
2019-08-16	2163.13	95.01	3.68	55.4	3.25	57.533	304	8.37	12.39	4.69	54.83	165.87	1.771	137.6	78.55	5.98	5719.5	1507.8	17.12	833	1458	1197	16200
2019-08-23	2185.27	96.03	3.57	53.47	3.15	55.995	302	8.16	12.21	4.77	54.08	167.09	1.774	137.66	74.5	6	5613	1534.16	17.43	851	1460	1150	15660
2019-08-30	2164.76	95.95	3.54	54.84	3.2	59.1	300	8.28	11.92	4.53	55.07	164.34	1.801	138.55	69.45	6.01	5655.75	1529.31	18.39	939	1542	1146.5	17900
2019-09-06	2215.32	95.35	3.43	54.52	3.18	58.475	298	8.2	11.69	4.69	56.45	171.1	1.88	137.77	63.75	5.79	5809.25	1520.8	18.77	947	1541	1139	17685
2019-09-13	2272.47	99.03	3.56	57.92	3.33	59.066	304	8.51	11.62	4.86	54.76	168.59	1.863	136.09	58.48	6	5949.25	1493.4	17.65	956	1600	1190	17750
2019-09-20	2401.76	97.33	3.59	57.95	3.27	58.485	295	8.39	11.78	4.9	57.92	178.85	1.985	139.68	55.13	6.03	5770	1503.68	17.8	940	1646	1230	17455
2019-09-27	2414.45	99.46	3.6	58.33	3.2	58.445	295	8.43	12.29	4.72	55.95	175.39	1.928	142.51	55.34	6.31	5736.25	1491.9	17.46	925	1670	1185	17205
2019-10-04	2428.34	98.7	3.73	58.81	3.37	58.673	305	8.79	12.89	4.76	52.84	167.32	1.88	144.43	59.22	6.32	5608	1507.51	17.5	873	1661	1145	17790
2019-10-11	2463.7	94.81	3.86	61.02	3.41	57.477	313	8.96	12.52	4.93	54.76	175.93	1.936	144.27	62.11	6.37	5763.5	1482.15	17.51	888	1700	1165	17550
2019-10-18	2457.33	95.39	3.8	62.3	3.49	58.189	309	8.95	12.42	5.17	53.75	175.14	1.949	145.96	65.53	6.44	5784.75	1489.9	17.56	886	1763	1255	16230
2019-10-25	2437.85	98.62	3.78	62.04	3.52	57.647	308	8.88	12.44	5.13	56.52	177.68	1.975	144.35	64.12	6.6	5907	1509.25	18	931	1778	1367	16775
2019-11-01	2443.93	102.74	3.8	61.37	3.47	56.569	313	8.98	12.6	5.11	56.04	174.47	1.925	146.45	60.88	6.81	5827	1511.25	18.08	935	1801	1363	16775
2019-11-08	2458.2	107.32	3.68	61.65	3.55	57.784	321	8.9	12.67	5.4	57.02	173.03	1.912	146.52	59.44	6.81	5910.75	1466.6	16.9	888	1768	1330.5	16190
2019-11-15	2583.85	106.18	3.63	61.73	3.64	58.314	327	8.76	12.85	5.47	57.54	171.51	1.935	146.69	59.24	6.81	5825.5	1466.78	16.98	883	1725	1312.75	14975
2019-11-22	2535.2	109.51	3.61	60.03	3.64	57.59	322	8.74	12.92	5.6	57.68	173.31	1.925	145.33	58.18	6.76	5837.75	1466.13	17.05	901	1765	1345	14635
2019-11-29	2500.5	111.77	3.58	60.65	3.63	57.875	313	8.63	12.98	5.68	58.12	171.36	1.927	145.11	58.6	6.9	5843.25	1461.54	17.02	894	1832	1317.5	13670
2019-12-06	2528.04	114.66	3.66	61.5	3.55	55.938	327	8.73	13.23	5.84	59.2	168.72	1.932	143.48	58.12	6.8	5962	1459.55	16.59	898	1872	1412	13475
2019-12-13	2492.66	118.75	3.69	62.37	3.53	56.907	324	8.93	13.56	5.97	60.11	170.18	1.957	144.61	59.81	6.93	6105.75	1472.23	16.95	933	1971	1397.75	14170
2019-12-20	2349.64	116.09	3.79	63.5	3.48	59.328	331	9.16	13.63	6.06	60.43	174.62	1.996	145.98	59.07	6.85	6147	1477.4	17.17	936	1930	1356.5	14525
2019-12-27	2422.43	118.56	3.79	64.15	3.33	57.277	328	9.2	13.64	6.21	61.76	178.48	2.028	139.14	58.17	6.93	6188	1512.74	17.95	946	1901	1320	14210
2020-01-03	2449.55	114.89	3.82	64.74	3.48	56.835	332	9.22	13.4	6.23	63	179.18	2.039	146.53	59.19	6.87	6104	1548.22	18.11	983	1977	1335.75	13755
2020-01-10	2527.1	110.56	3.82	66.85	3.52	56.096	340	9.27	14.07	6.32	59.02	169.84	1.916	146.46	58.99	6.94	6172.25	1559.69	18.14	969	2110	1373	14190
2020-01-17	2717.75	105.79	3.84	66.79	3.56	55.739	338	9.1	14.4	6.41	58.55	168.62	1.833	145.74	60.14	6.88	6247.25	1557.06	18.05	1016	2465	1440	13910
2020-01-24	2659.36	104.58	3.84	64.94	3.67	56.565	338	8.83	14.32	6.44	54.09	155.88	1.709	141.99	61.9	6.72	5899.75	1571.2	18.06	1013	2455	1433	12950
2020-01-31	2699.56	101.1	3.76	63.04	3.56	56.679	338	8.54	14.4	6.18	51.58	153.37	1.595	141.98	61.41	6.52	5551.25	1586.7	18.02	959	2295	1375	12850
2020-02-07	2765.33	97.85	3.8	63.32	3.55	56.024	338	8.66	14.73	6.24	50.34	156.31	1.612	140.41	58.46	6.51	5648.25	1567.48	17.7	971	2298	1350.25	12770
2020-02-14	2752.58	104.07	3.75	62.98	3.46	57.818	338	8.81	14.69	6.07	52.03	162.48	1.669	140.61	55.97	6.55	5750.75	1581.57	17.76	972	2458	1370	13015
2020-02-21	2738.51	105.83	3.74	63.68	3.49	57.448	338	8.8	15.21	6.11	53.36	168.95	1.65	141.02	55.91	6.37	5746	1642.4	18.52	976	2690	1366	12530
2020-02-28	2584.87	106.34	3.65	56.17	3.29	54.657	338	8.75	14.11	5.59	44.83	145.55	1.45	133.52	56.25	5.85	5617.25	1586.71	16.79	871	2719	1356	12255
2020-03-06	2506.54	105.34	3.75	57.61	3.41	55.568	338	8.78	13.09	5.52	41.14	138.04	1.372	134.89	57.09	5.84	5589	1667.99	17.16	895	2571	1370.5	12840
2020-03-13	2344.65	104.95	3.63	55.31	3.55	56.793	338	8.36	11.72	5.39	31.72	92.67	1.147	124.67	59.29	5.16	5447.75	1530.94	14.78	782	1744	1352	12320
2020-03-20	2170.93	111.28	3.29	48.5	3.41	60.154	338	8.5	10.9	5.7	19.48	60.39	0.991	116.15	62.18	5.18	4805.25	1486.54	12.54	614	1635	1161.5	11225
2020-03-27	2181.13	109.3	3.29	46.15	3.31	67.018	338	8.7	11.13	6.02	15.48	54.78	1.038	132.57	65.56	5.15	4782.5	1626.54	14.39	742	2253	1160	11355
2020-04-03	2218.47	108.83	3.16	45.8	3.35	64.939	338	8.42	10.39	5.64	28.36	53.02	1.081	119.38	57.65	4.71	4824	1618.74	14.39	714	2140	1160	11239
2020-04-10	2280.84	111.71	3.17	49.19	3.44	63.201	338	8.52	10.56	5.72	22.9	58.98	0.968	114.31	48.02	4.86	4993	1681.76	15.4	735	2166	1143	11672
2020-04-17	2282.56	111.47	3.06	48.07	3.59	61.179	338	8.21	10.55	5.49	18.31	62.03	0.944	117.88	46.53	4.99	5194	1693.9	15.14	780	2154	1159	12042
2020-04-24	2266.85	103.86	3	51.58	3.6	61.863	338	8.21	9.87	5.49	15.99	61.41	0.655	119.72	45.36	4.69	5118.74	1718.82	15.08	763	2005	1230.5	12246
2020-05-01	2313.56	104.89	2.93	52.62	3.54	64.46	320	8.37	11.35	5.47	19.72	68.55	0.755	118.91	65.15	5.13	5081	1691.97	14.94	765	1934	1185	11955
2020-05-08	2309.69	106.99	2.98	51.63	3.69	68.009	320	8.38	10.66	5.44	24.73	87.48	0.811	122.6	65.75	5.41	5243.25	1713.78	15.27	758	1810	1166	12330
2020-05-15	2308.88	104.49	2.99	53.82	3.75	70.066	320	8.24	10.7	5.23	29.44	87.25	0.85	125.73	67.6	5.32	5156	1744.07	16.61	768	1840	1200	11855
2020-05-22	2311.93	103.62	3	53.18	3.8	71.49	317	8.21	11.16	5.28	33.49	95.63	0.908	126.24	62.3	5.33	5259.8	1736.32	17.09	835	1915	1223.5	12250
2020-05-29	2342.35	98.68	3.09	53.16	3.89	70.35	314	8.27	11.17	5.4	35.57	94.59	0.932	128.96	62.95	5.44	5352.25	1731.55	17.84	825	1920	1230	12324
2020-06-05	2320.98	101.16	3.15	57.25	3.96	73.369	324	8.55	12.27	5.35	39.49	112.86	1.042	129.07	51.93	5.34	5669.35	1681.39	17.34	823	1925	1210	12991
2020-06-12	2273.8	98.52	3.16	55.3	3.74	71.148	322	8.58	12.18	5.22	36.24	105.38	1.044	128.51	48.38	5.27	5761.5	1733.8	17.55	822	1935	1214.25	12665
2020-06-19	2131.38	97.26	3.18	55.86	3.66	69.496	318	8.64	12.31	4.96	39.72	119.5	1.153	129.12	45.06	5.24	5829.25	1741.04	17.73	820	1888	1214	12769
2020-06-26	2143.27	97.31	3.05	56.12	3.72	71.945	314	8.48	11.81	4.84	38.53	109.15	1.073	129.68	45.23	5.25	5953.25	1760.56	17.8	799	1847	1214	12684
2020-07-03	2083.84	102.11	3.3	59.41	3.82	70.983	327	8.77	12.42	5	40.57	120.4	1.175	128.88	45.66	5.47	6023.5	1775.36	18.04	808	1905	1205	12996
2020-07-10	2085.34	98.59	3.24	60.57	3.68	73.597	324	8.68	12.16	5.44	40.56	124.17	1.201	135.17	45.62	5.45	6418.55	1800.69	18.71	835	1944	1240	13515
2020-07-17	2061.39	102.73	3.2	57.72	3.54	73.199	319	8.8	12.12	5.49	40.55	119.15	1.168	136.31	47.9	5.57	6456	1810.06	19.37	824	2023	1250	13220
2020-07-24	2105.9	108.01	3.13	57.39	3.45	71.547	334	8.86	11.91	5.54	41.23	123.97	1.207	139.99	50.23	5.57	6430.25	1902.48	22.66	925	2185	1305.5	13656
2020-07-31	2271.08	114.25	3.03	58.01	3.33	70.92	334	8.76	12.92	5.48	40.1	114.21	1.165	139.8	53.11	5.61	6422	1975.1	24.1	905	2065	1323.75	13786
2020-08-07	2380.77	111.74	2.95	57.24	3.16	66.989	327	8.51	12.96	5.1	41.16	117.72	1.167	142.61	53.02	5.59	6308	2039.08	27.85	979	2150	1315.5	13689
2020-08-14	2332.05	112.96	3.12	57.43	3.08	69.752	335	8.85	13.33	5.22	42.05	122.87	1.179	142.2	54.47	5.74	6377.75	1948.09	26.66	952	2146	1300	14366
2020-08-21	2280.5	115.29	3.14	58.37	3.14	67.616	339	8.91	13.1	5.5	42.32	126.84	1.143	144.04	56.06	5.71	6511.5	1939.85	26.76	900	2190	1321.75	14691
2020-08-28	2467.85	116.87	3.35	59.01	3.21	67.189	353	9.37	12.93	5.59	42.96	128.06	1.164	140.99	56.6	5.49	6697.5	1966.36	27.55	930	2176	1320	15367
2020-09-04	2472.89	124.32	3.43	58.83	3.18	67.815	360	9.48	12.35	5.63	39.69	121.82	1.088	140.2	58.64	5.44	6729.5	1921.33	26.43	903	2290	1485	15293
2020-09-11	2410.94	123.36	3.52	58.77	3.17	67.253	371	9.74	12.33	5.55	37.33	115.24	1.037	141.47	64.55	5.5	6770.25	1947.8	26.94	929	2301	1450	15094
2020-09-18	2500.92	110.89	3.62	60.05	3.13	68.425	398	10.17	13.11	5.85	41.09	128.53	1.103	141.98	71.29	5.6	6852.75	1954.65	26.94	939	2321	1440.25	14904
2020-09-25	2436.65	111.12	3.51	60.34	3.21	61.92	396	9.71	13.26	5.52	40.06	125.3	1.065	142.61	75.42	5.61	6543.55	1862.09	22.91	841	2204	1497.25	14264
2020-10-02	2339.27	107.34	3.58	60.18	3.19	65.366	407	9.96	13.26	5.98	36.9	118.4	1.043	142.74	77.26	5.56	6546.75	1907.74	23.82	891	2312	1530	14418
2020-10-09	2302.02	107.94	3.71	62.1	3.23	66.562	420	10.5	13.76	6.04	40.44	124.91	1.145	141.28	78.14	5.65	6767.5	1926.15	24.66	892	2450	1522	15221
2020-10-16	2237.28	105.82	3.78	64.53	3.23	65.224	432	10.28	13.83	6.35	40.7	121.29	1.133	140.26	78.27	5.46	6723.8	1903.31	24.26	870	2331	1560	15652
2020-10-23	2341.56	104.49	4.03	66.18	3.39	64.654	465	10.66	14.05	6.43	39.73	116.54	1.089	133.7	78.17	5.2	6852.25	1899.92	24.58	917	2394	1550	15712
2020-10-30	2191.11	104.83	3.86	64.21	3.36	65.138	456	10.4	13.52	6.08	35.64	107.55	1.021	136.48	74.49	5.39	6707.5	1880.77	23.55	852	2228	1510	15156
2020-11-06	2222.07	106.75	3.96	64.3	3.42	65.565	456	10.84	14.16	6.22	36.97	111.84	1.063	135.58	71.13	5.43	6935	1951.65	25.51	911	2450	1555.5	15362
2020-11-13	2238.41	108.18	3.99	64.35	3.52	69.648	463	11.24	14.14	6.13	39.93	115.51	1.108	137.68	70.08	5.52	6966.3	1893.05	24.68	897	2332	1608.25	15892
2020-11-20	2534.5	111.31	4.13	68.07	3.53	72.515	463	11.67	14.34	6.13	41.99	119.91	1.205	136.94	67.83	5.31	7262.5	1873.93	24.32	956	2337	1644.25	16151
2020-11-27	2554.35	116.17	4.1	68.67	3.49	73.369	466	11.73	14.11	6.18	45.58	130.85	1.313	138.9	66.81	5.52	7487.5	1784.73	22.65	949	2362	1651.5	16455
2020-12-04	2479.59	111.16	4.12	67.21	3.52	71.917	450	11.53	13.88	6.03	46.23	128.42	1.319	138.28	65.79	5.45	7750.75	1833.94	24.12	1060	2350	1800	16399
2020-12-11	2431.69	113.43	4.13	69.72	3.83	67.73	444	11.44	13.87	6.42	46.59	133.5	1.354	136.57	64.96	5.52	7754.95	1845.61	24.01	1009	2332	1923.5	17284
2020-12-18	2353.03	116.09	4.3	72.87	3.91	68.385	478	12.08	13.94	6.36	49.04	142.79	1.428	139.56	62.55	5.57	7968.75	1884.24	25.87	1038	2331	1924	17484
2020-12-25	2385.85	117.07	4.43	71.85	3.92	68.812	495	12.5	14.13	6.57	48.18	141.05	1.412	139.82	60.6	5.57	7770.75	1878.44	25.79	1009	2330	1921	16993
2021-01-01	2424.35	118.45	4.79	73.58	4.04	71.49	510	13.05	14.79	6.73	48.35	143.59	1.398	136.55	60.62	5.56	7749	1897.77	26.38	1068	2342	1921.5	16613
2021-01-08	2356.44	114.42	4.89	75.41	4.15	71.186	518	13.66	14.9	6.84	52.14	157.39	1.484	136.16	63.91	5.54	8118	1854.99	25.59	1112	2435	1973.5	17667
2021-01-15	2402.04	118.19	5.23	76.56	4.17	69.904	540	14.2	15.67	7.2	52.25	155.86	1.493	132.9	65.56	5.51	7937.4	1825.48	24.81	1085	2423	2004.5	18007
2021-01-22	2412.65	114.82	4.88	77.45	4.14	67.627	491	13.02	15.19	6.72	52.28	157.53	1.476	134.48	65.88	5.64	7993.5	1854.08	25.5	1093	2355	1960.5	18269
2021-01-29	2401.55	115.32	5.35	76.71	4.08	64.796	493	13.58	15.17	7	52.16	159.25	1.487	136.43	68.27	5.77	7862.4	1858.01	27.16	1110	2327	1926	17691
2021-02-05	2411.79	117.18	5.38	87.7	3.99	64.796	483	13.55	15.74	6.79	56.8	166.97	1.59	135.47	70.4	5.76	7927	1808.24	26.96	1121	2338	1940	18029
2021-02-12	2394.93	115.21	5.27	83.77	3.98	65.167	474	13.6	15.72	6.74	59.5	170.99	1.661	135.34	74.54	5.77	8352.25	1826.76	27.32	1221	2355	2065.5	18569
2021-02-19	2371.71	120.73	5.33	85.59	4.08	64.056	466	13.67	16.97	6.88	59.12	180.4	1.701	141.12	77.74	5.73	8946.75	1785.19	27.46	1294	2363	2208.75	19588
2021-02-26	2507.04	127.06	5.44	83.94	4.22	63.657	457	13.94	16.61	6.93	61.55	189.45	1.719	138.35	80.7	5.61	9139.25	1727.44	26.24	1204	2362	2214.5	18577
2021-03-05	2485.97	119.51	5.4	82.87	4.21	64.35	445	14.29	15.97	6.85	66.08	204.7	1.806	133.92	85.32	5.5	8913.2	1696.1	24.96	1123	2348	2215	16425
2021-03-12	2506.39	122.03	5.3	82.74	4.25	66.771	425	14.12	15.83	6.71	65.59	220.82	1.808	133.93	89.35	5.6	9103.5	1710.69	25.76	1186	2358	2196.25	16013
2021-03-19	2429.12	119.3	5.5	80.84	4.17	67.559	430	14.13	15.54	6.59	61.43	188.78	1.672	134.26	92.71	5.51	9072.5	1740.01	26.24	1173	2615	2204	16299
2021-03-26	2414.94	119.63	5.47	75.77	4.27	65.024	425	13.9	15.06	6.41	60.93	192.28	1.645	138.85	97.38	5.65	8967	1733.21	25.07	1161	2638	2167	16389
2021-04-02	2374.1	114.22	5.52	73.34	4.24	64.512	445	13.94	14.72	6.38	61.41	199.43	1.674	139.8	100.1	5.69	8794.5	1729.6	24.79	1199	2640	2041.5	16214
2021-04-09	2304.74	118.54	5.73	77.94	4.17	64.455	418	14.02	15.41	6.66	59.29	195.34	1.655	143.36	101.89	5.71	8935.25	1742.84	25.26	1203	2644	1975	16628
2021-04-16	2379.56	120.52	5.81	79.25	4.28	66.192	426	14.38	16.57	6.81	63.16	202.65	1.739	140.13	103.76	5.55	9227	1778.91	26.07	1199	2765	1949.5	16363
2021-04-23	2387.8	125.51	6.58	84.62	4.22	66.05	450	15.52	16.86	7.38	62.18	196.45	1.714	135.5	107.17	5.35	9581.5	1775.76	26.02	1244	2910	1927	16395
2021-04-30	2336.07	127.93	6.84	83.9	4.24	63.771	448	15.51	17.09	7.62	63.5	205.23	1.741	132.63	107.1	5.36	9829	1770.46	25.93	1218	2981	2030	17674
2021-05-07	2408.2	135.75	7.44	85.48	4.37	65.736	468	16.17	17.54	7.82	64.96	211.84	1.828	130.15	110.1	5.44	10420	1835.08	27.43	1244	2858	2100	18082
2021-05-14	2456.34	130.12	6.54	80.8	4.04	67.293	446	16.03	17.04	7.27	65.32	214.89	1.853	133.9	111.42	5.35	10214.5	1837.32	27.4	1226	2861	2129.25	17544
2021-05-21	2418.03	134.53	6.73	78.64	3.84	68.841	419	15.4	16.81	6.88	63.61	205.32	1.804	135.66	111.81	5.42	9867.5	1874.94	27.41	1198	2832	2132	16791
2021-05-28	2392.69	144.5	6.66	77.94	4.05	69.325	421	15.44	17.41	6.77	66.31	210.77	1.849	136.12	113.44	5.36	10248.2	1895.21	27.85	1170	2817	2147	18113
2021-06-04	2385.64	144.56	6.91	81.62	4.14	71.404	419	15.96	17.79	7.01	69.57	216.19	1.893	141.07	116.51	5.33	9939.5	1894.25	27.85	1160	2840	2138.5	18020
2021-06-11	2350.64	141.51	6.89	82.82	4.11	70.635	410	15.17	17.7	6.94	71	214.07	1.89	139.61	121.89	5.41	9975.1	1882.28	28.05	1153	2787	2127.25	18227
2021-06-18	2354.33	136.91	6.58	82	4.05	68.357	410	13.95	16.68	6.81	71.64	212.6	1.873	141.28	120.68	5.49	9119.75	1775.97	26.04	1070	2551	2120	17154
2021-06-25	2351.99	141.2	6.19	83.42	3.96	69.923	387	13.19	17.27	6.47	74.21	221.49	1.955	146.18	114.19	5.51	9388.4	1780.98	26.06	1101	2636	2085	18523
2021-07-02	2316.82	140.24	6.77	83.4	4.16	72.578	424	14.44	18	6.47	75.37	227.31	1.989	145.96	111.26	5.53	9350.52	1783.7	26.41	1091	2779	2239.5	18342
2021-07-09	2326.82	139.98	6.08	83.88	4.09	73.147	398	13.89	17.29	6.09	74.56	225.86	1.962	153.82	110.1	5.38	9482.25	1808.25	26.13	1090	2800	2238	18747
2021-07-16	2303.39	150.88	6.34	86.59	4.6	73.905	393	14.54	17.7	6.79	71.76	224.01	1.928	150.73	112.26	5.44	9391.25	1812.56	25.73	1134	2706	2236.5	19070
2021-07-23	2303.78	166.43	6.26	86.21	4.75	79.237	380	14.14	18.16	6.71	72.24	228.99	1.955	153.85	112.22	5.44	9495	1798.95	25.23	1075	2728	2234	19372
2021-07-30	2356.79	158.25	6.25	85.72	4.76	77.3	378	14	17.94	6.85	73.93	235.62	2.031	155.58	112.04	5.48	9701	1823.24	25.57	1044	2658	2231	19552
2021-08-06	2405.01	154.09	6.17	88.31	4.54	79.123	387	13.86	18.74	7.02	68.26	226.29	1.884	156.3	111.21	5.46	9446	1763.95	24.32	997	2661	2228	19214
2021-08-13	2512.7	160.06	6.19	91.32	4.71	79.094	398	14	19.98	7.33	68.36	226.08	1.863	155.54	109.67	5.51	9542.5	1774.35	23.82	1025	2646	2250.5	19656
2021-08-20	2506.77	158.37	5.95	90.04	4.99	79.635	393	13.29	19.72	6.8	62.25	200.5	1.695	155.73	107.9	5.54	9044	1782.6	23.2	976	2296	2270	18463
2021-08-27	2522.33	167.9	5.95	92.41	5.31	83.879	398	13.27	20.19	6.82	68.84	228.23	1.931	159.56	103.49	5.56	9423.75	1807.61	23.99	991	2421	2270	19011
2021-09-03	2569.93	168.41	5.28	91.76	5.16	78.918	386	12.62	19.89	6.59	69.34	233.65	1.997	157.17	100.06	5.37	9420.5	1833.8	24.74	1006	2407	2300	19789
2021-09-10	2543.81	167.75	5.2	91.41	5.24	80.338	403	12.55	19.13	6.07	69.82	230.49	1.98	155.09	97.4	5.3	9684.5	1794.44	23.91	977	2199	2550	20392
2021-09-17	2587.51	168.46	5.1	89.08	5.74	80.205	415	12.59	19.44	6.47	72.09	228.5	2.046	153.75	94.04	5.24	9307.25	1753.95	22.49	953	2023	2448.5	19358
2021-09-24	2528.2	174.48	4.96	92.85	6.03	80.063	407	12.45	19.46	6.47	74.18	226	2.135	154.87	91.51	5.27	9343.75	1752.18	22.49	969	1943	2527	19387
2021-10-01	2627.59	182.05	5.12	101.32	6.19	77.813	388	12.07	19.5	6.47	76.01	234.32	2.266	152.53	94.05	5.17	9135	1756.1	22.57	972	1911	2534.5	17971
2021-10-08	2664.46	180.97	5	107.39	6.13	74.737	382	12.08	19.8	6.47	79.55	243.5	2.338	153.62	91.6	5.35	9387.75	1759.45	22.79	1029	2044	2634	19221
2021-10-15	2565.03	180.78	4.96	104.15	6.47	70.436	386	11.8	19.47	6.47	82.39	257.11	2.435	153.9	86.88	5.37	10538	1773.45	23.33	1049	2121	2772	20020
2021-10-22	2521.69	180.4	5.08	105.08	6.92	72.23	392	11.85	18.76	6.47	84.53	256.63	2.414	155.89	82.98	5.3	9857	1806.38	24.26	1062	2015	2770	19739
2021-10-29	2461.66	183.15	5.38	111.67	7.36	70.094	388	12.01	18.97	6.47	83.5	253.2	2.342	156.56	79.16	5.3	9808.5	1776.81	23.93	1009	1972	2517	19448
2021-11-05	2344.07	184.53	5.36	113.23	7.62	67.967	381	11.82	19.62	6.47	81.25	245.5	2.315	154.62	79.29	5.4	9753	1810.47	24.04	1028	2028	2514.5	19434
2021-11-12	2388.76	194.68	5.62	113.76	7.66	74.48	402	12.21	19.73	6.47	80.87	241	2.266	155.43	76.17	5.38	9841	1862.36	25.26	1075	2059	2461.5	19979
2021-11-19	2458.2	200.47	5.57	113.79	7.9	73.255	403	12.43	19.7	6.47	76.11	228.53	2.15	156.29	72.88	5.43	9753	1859.66	24.9	1036	2079	2407	20044
2021-11-26	2319.05	207.44	5.74	109.14	7.92	71.575	388	12.33	18.96	6.47	78.32	238.23	2.234	161.29	70.6	5.58	9572	1799.35	23.09	978	1798	2405	19897
2021-12-03	2365.66	208.56	5.73	101.63	7.49	70.322	410	12.53	18.37	6.47	66.39	203.42	1.958	160.43	70.78	5.5	9486	1774.9	22.43	940	1812	2452.5	20030
2021-12-10	2356.03	201.32	5.78	103.66	7.82	73.028	424	12.56	19.31	6.47	71.71	222.28	2.118	162.16	72.18	5.45	9506.9	1784.9	22.18	945	1770	2245	19746
2021-12-17	2400.57	204.09	5.82	104.69	7.86	74.48	419	12.74	18.74	6.47	70.93	220.56	2.065	160.7	72.93	5.39	9467.5	1803.45	22.52	935	1779	2246	19648
2021-12-24	2383.89	200.52	5.92	106.19	7.37	78.525	442	13.15	18.9	6.47	73.89	225.2	2.212	160.28	71.16	5.52	9595	1808.4	22.9	971	1890	2311	20045
2021-12-31	2439.31	198.57	5.8	109.39	7.8	79.721	453	13.1	18.62	6.47	75.33	226.85	2.211	165.35	71.85	5.54	9740.63	1822.39	23.27	959	1973	2200	20757
2022-01-07	2441.39	206.18	5.94	111.83	7.55	80.518	470	13.88	17.85	7.88	79	234.39	2.374	161.98	74.7	5.42	9692	1791.65	22.3	960	1904	2299.75	20734
2022-01-14	2567.27	207.52	5.83	116.38	7.06	83.044	470	13.43	18.1	7.64	83.82	247.04	2.513	161.8	75.9	5.46	9730.25	1821.25	22.95	979	1870	2300	22194
2022-01-21	2503.86	204.28	6.01	117.25	7.2	84.996	458	13.88	18.62	7.97	85.16	248.36	2.551	161.1	78.32	5.46	9984	1832.12	24.34	1046	2112	2350	24028
2022-01-28	2420.58	203.15	6.22	120.12	7.22	82.683	474	14.44	17.94	8.04	87.67	260.28	2.655	158.44	82.15	5.48	9556.5	1784.65	22.24	1003	2328	2505	22332
2022-02-04	2576.57	208.15	6.08	122.81	7.85	79.55	500	15.34	17.87	7.69	92.27	272.33	2.776	160.14	85.87	5.61	9870.5	1803.92	22.49	1016	2287	2540	22991
2022-02-11	2650.64	216.11	6.38	121.32	8.17	78.297	508	15.66	17.93	8.02	93.1	280.96	2.86	163.16	90.51	5.62	9894.25	1833.51	23.27	1023	2224	2600	23051
2022-02-18	2517	211.47	6.41	118.57	7.54	77.556	501	15.82	17.78	8.01	91.26	274.08	2.659	162.17	95.23	5.6	10010	1895.4	23.95	1091	2360	2651	24144
2022-02-25	2487.02	205.59	6.46	116.49	7.29	77.414	510	15.73	17.69	8.52	91.68	277.99	2.702	159.91	99.09	5.47	9918	1887.3	23.91	1055	2320	2702	24361
2022-03-04	2473.13	194.48	7.27	114.28	7.66	83.991	525	16.39	19.17	10.7	115.77	341.14	3.735	155.37	99.28	5.22	10702	1961.1	25.57	1092	2965	2893	28919
2022-03-11	2498.46	194.94	7.42	118.89	7.46	79.282	568	16.51	19.23	10.44	109.31	319.38	3.438	152.31	100.85	5.25	10150.8	1983.2	25.99	1057	2766	2870	48033
2022-03-18	2425.16	193.7	7.24	124.57	7.65	84.001	551	16.43	18.86	10.06	104.69	313	3.634	154.93	101.8	5.41	10327	1930.48	25.05	1034	2535	2873	36915
2022-03-25	2447.47	194.8	7.33	133.33	8.07	84.933	552	16.82	19.52	10.7	116.2	331.25	4.045	155.11	102.93	5.4	10249	1958.8	25.45	1011	2498	2876	35491

## Sheet: Return（市场收益率）
市场收益率	Cocoa	Coffee	Corn	Cotton	Oats	Orange juice	Soybean meals	Soybeans	Sugar	Wheat	WTI oil	Gasoline	Heating oil	Feeder cattle	Lean hog	Live cattle	Copper	Gold	Silver	Platinum	Palladium	Aluminum	Nickel
2011-01-07
2011-01-14	4.36883	2.30641	8.87612	1.98887	4.78078	-3.0417	5.67528	4.12734	7.56063	0.265252	3.85348	2.77329	5.65563	2.22701	2.42379	3.16232	2.39606	-1.29432	-2.75807	4.28718	5.29497	-1.52942	6.69246
2011-01-21	10.8749	2.04022	0.798089	5.93238	-3.75513	0.0863738	-1.15608	-1.08894	-2.03397	8.38054	-3.68331	-1.56951	0.529502	0.754958	2.27493	-0.781254	-2.11553	-1.11696	-2.83631	0.330761	2.36183	0.175979	1.09543
2011-01-28	0.0285025	2.19963	-1.76428	9.90585	2.02027	-4.42551	-2.11524	-0.659102	6.72105	0.121729	-0.0793786	-0.357579	1.27438	-1.65097	3.40672	-0.524248	0.894554	-1.10701	1.76868	-1.83288	-0.987662	1.32091	1.74313
2011-02-04	0.644569	1.82232	5.66189	2.18585	6.29748	3.50613	1.18065	2.7538	-3.08917	4.40285	-0.318146	-1.79075	0.705143	-0.423036	3.63631	0.262467	5.29996	1.38557	3.58436	2.982	0.864737	1.65631	6.29642
2011-02-11	0.412204	1.39842	4.19223	9.14324	-1.18065	-4.11313	0	-1.07798	-0.86236	1.38731	-4.04095	1.8884	-0.407634	1.66578	4.56222	-0.131148	-0.885767	1.34834	3.36023	-0.490865	1.10093	-0.170812	-0.176523
2011-02-18	0.637237	5.22682	0.584797	9.77277	-0.71514	5.73495	-6.79873	-3.38019	-3.62936	-6.27796	0.755522	3.24093	0.666176	1.34398	-3.53159	1.69165	-1.09112	1.38094	6.3996	0.381992	2.99603	0.0106843	2.95931
2011-02-25	3.45593	-0.963971	-3.41026	-13.886	-13.5584	3.49946	-2.03053	-3.80853	-3.62269	-7.8821	12.6746	13.7877	8.41486	-0.00776187	1.21097	-0.517466	-1.02889	1.66784	3.11321	-2.48152	-7.6017	0.213447	-3.34876
2011-03-04	4.01157	0.914647	5.00104	15.377	6.3682	-4.63248	2.78147	6.97172	1.4225	6.28009	7.79046	-0.982343	4.28139	-0.466818	0.582261	0	1.22632	1.37336	6.88917	2.04483	3.25843	1.68089	2.14081
2011-03-11	-4.85957	0.567993	-9.47365	-2.81539	-10.2793	-3.22395	-5.11621	-5.96747	-5.89047	-16.1423	-3.11491	-2.0825	-2.10119	1.02414	1.2598	1.79953	-7.50148	-1.28538	1.46234	-2.82959	-7.28757	-0.409686	-10.4204
2011-03-18	-5.78273	1.81196	3.10584	-4.61528	-6.16936	-2.90204	4.36526	2.12936	-6.7389	4.98324	-0.0791296	-1.76257	0	-0.0926713	-1.8659	-4.29474	3.64514	0.6518	-2.05902	-3.26023	-3.64659	0.629593	3.03629
2011-03-25	-2.63853	-1.66936	1.66797	8.66948	4.1549	-1.0017	-3.06146	0	4.00525	3.27898	3.71978	4.06996	1.12175	1.60187	1.64335	4.54919	1.66801	1.07024	6.74908	1.84337	3.64659	-0.230391	1.11525
2011-04-01	-7.83936	-4.20195	7.10959	-4.25362	5.10026	0.248363	-2.09432	2.746	-0.734019	3.8238	2.50437	6.24952	2.49486	2.83356	4.81869	3.49599	-3.46327	-0.672207	0.478343	1.1915	2.35922	-0.652153	-5.50947
2011-04-08	1.84932	4.58421	4.51822	4.00806	1.91524	1.32974	-2.13912	-0.14652	-2.83149	4.30446	4.29508	3.31134	5.84198	0.618923	2.34135	-3.49599	5.33755	3.16794	6.86393	1.67789	0.774197	3.54551	7.52234
2011-04-15	3.04065	3.9364	-3.5426	-6.59524	2.14485	2.78602	-1.08697	-4.26871	-6.21216	-7.45847	-2.80004	0.363682	-2.90941	-2.04816	2.55416	-1.15017	-4.89969	0.89354	5.8409	-0.891371	-0.774197	-1.00318	-5.37754
2011-04-22	-0.960326	2.54351	-0.55633	-11.0691	1.57898	0.298431	0.54496	3.82786	2.22465	6.33696	2.30894	1.41388	-1.06218	-0.843251	0.974171	0.640617	3.11841	1.35012	6.83545	1.3893	-0.910872	3.02977	2.80859
2011-04-29	1.60715	0.240874	2.47947	-9.53454	-13.6894	0.475645	1.08109	0.952737	-5.67922	-3.70176	1.48375	1.66765	2.45087	-0.37117	-0.772205	-3.24493	-4.06326	2.08899	5.70009	1.26133	1.55645	-0.209822	-0.186047
2011-05-06	-3.17942	-1.68999	-10.3096	-5.42393	-4.282	-0.783515	-1.08109	-4.7806	-8.5734	-2.90258	-15.7463	-6.99709	-13.603	-1.85361	-2.27698	-3.08129	-5.39238	-2.68449	-30.6883	-2.53877	-7.48012	-3.27365	-8.73161
2011-05-13	-0.642403	-5.13732	0.451468	-2.44865	6.64897	6.06518	1.34955	0.458016	3.24964	-3.5426	2.38689	-0.774299	2.77026	0.0541021	0.530908	0	-0.43521	0.731042	-3.67825	-0.841992	-0.416957	0.453703	-0.836654
2011-05-20	-1.46629	-3.21771	11.6113	7.84031	4.85117	-1.38653	0.801072	4.0304	3.14735	11.2685	-0.0604961	-6.31882	-0.960886	-1.96636	3.63947	-3.31981	3.14288	0.106842	1.64198	-0.395369	2.20395	-3.13505	-3.5882
2011-05-27	0.451816	1.48859	0.400267	-2.86192	3.8256	2.6713	-0.266312	0.510764	3.05131	0.986444	1.43196	4.84857	2.78835	-3.35755	-2.7894	-2.13228	1.51884	1.6563	7.4312	1.06953	3.08542	1.32871	-1.93015
2011-06-03	-3.41206	1.34646	-0.400267	8.41838	0.534761	-1.14372	0.531916	2.44441	3.50913	-4.77478	-0.298716	-2.74665	2.3858	1.3035	-1.62026	-1.73917	-1.09981	0.354909	-4.92014	1.16895	1.70273	-1.11662	-1.26391
2011-06-10	3.28803	-1.50926	4.31722	-8.35861	5.19597	1.5046	0.792607	-2.15371	4.36104	-2.0807	-0.98207	-0.814088	1.10714	-0.0241342	-0.940926	0.291971	-1.82391	-0.259057	2.17729	1.21014	5.06437	-0.212089	0.219058
2011-06-17	-0.667902	-4.8926	-11.379	-3.47238	-9.00078	-1.42085	-6.24355	-3.54542	3.01371	-11.1071	-6.5331	-2.52877	-3.79521	2.06242	3.8599	5.25316	1.81566	0.231101	-2.8202	-4.35823	-7.16419	-0.788664	-5.51011
2011-06-24	2.26236	-1.21457	-4.24972	-9.55783	-0.555557	7.76899	-0.843887	-0.906351	2.69766	-3.13225	-2.31645	-6.95742	-7.65171	4.77838	7.69219	2.86318	-0.562822	-2.01576	-2.06836	-3.19145	-2.00944	-1.19478	2.39874
2011-07-01	3.4282	6.10717	-6.65365	-0.599327	-4.26807	-2.92365	-1.4225	-0.0759013	0.493079	-7.22449	4.22249	8.91895	5.44112	1.48416	-0.658317	-0.539085	4.26	-1.48118	-2.93412	0.705056	1.47753	0.830328	3.76567
2011-07-08	1.10472	-0.51274	6.3538	-5.81167	-0.875918	0.106906	4.48254	2.62286	6.62397	7.07286	1.45545	4.87406	5.87619	2.90383	-3.92049	2.66682	2.25194	3.74308	7.68628	1.8562	3.40793	-1.14484	3.79657
2011-07-15	-1.01365	-4.18518	9.03841	-8.56633	8.16205	0.399415	3.49968	2.84379	-1.64231	18.51	1.07528	1.58304	1.1285	0.272891	-2.55439	-3.8905	0.075148	3.05843	6.24376	1.14287	0.128783	-1.12514	1.10314
2011-07-22	0.837615	-5.65475	-0.688234	-5.98287	-2.18588	-1.17661	1.57484	-0.721504	6.95207	-15.6676	2.3277	-0.891682	-0.0320667	-2.57151	2.51337	-0.411241	0.0336687	0.844453	2.73227	1.85764	3.78833	4.07912	-0.747978
2011-07-29	-5.53869	-0.110492	-4.08795	-1.39954	-0.276625	2.4714	-2.37165	-2.04835	-4.60404	-1.63572	-3.94498	-0.932815	-1.0316	-0.420308	4.76662	-0.137457	1.61056	1.27132	-0.299925	-0.783879	2.08469	0.881988	4.16642
2011-08-05	-1.90988	-1.02026	3.1164	-0.132513	-3.66755	-8.9165	-1.88431	-2.09119	-7.10293	0.149813	-9.63663	-8.01917	-5.05091	-0.682141	4.74575	1.77237	-8.44735	2.39959	-5.215	-4.0143	-10.4821	-6.09906	-10.4938
2011-08-12	-1.55495	3.0153	0.417537	-9.07553	3.39016	-8.2509	-0.54496	0.0754432	1.42431	1.92741	-1.97589	0.411781	-1.0622	-0.507199	0.102531	2.13912	-1.91756	3.93308	2.50013	5.18783	0.671594	1.71848	-5.03466
2011-08-19	4.44329	7.95083	0.554018	8.69595	-0.557105	2.2802	2.42927	2.23723	9.33798	-9.70738	-3.41485	0.0821531	0.412513	0.70045	-2.86341	-4.18697	-0.461764	6.89659	7.90926	3.0098	0.400802	-0.39396	-0.915392
2011-08-26	0.283683	3.16577	5.24666	-4.84052	6.7502	-1.68894	1.84946	3.8341	-1.36521	17.4742	3.62592	3.80762	2.43997	-1.66976	-4.47002	-0.970209	2.87993	-4.09187	-4.64521	-2.34535	-0.400802	0.808129	1.14876
2011-09-02	1.34771	2.76467	-2.38738	3.42341	-4.26731	-0.399972	2.07261	0.848062	-3.28356	-4.16149	1.25715	1.68701	0.100385	-0.795971	-7.43779	0.416957	-0.0551922	5.24641	3.80998	3.31102	4.96185	0.952594	0.232829
2011-09-09	-4.95176	-6.0898	-3.4133	5.40571	-2.48289	3.76242	-2.86105	-1.56032	-1.71924	-4.93569	0.909673	-3.45194	-0.570184	0.516209	-6.14619	3.27451	-2.8787	-0.966937	0.882745	-1.66895	-4.82807	-1.41046	-1.6413
2011-09-16	-4.17878	-2.50071	-6.60211	-1.95578	-2.54611	-3.50395	-4.86582	-4.98272	-4.58321	-5.19201	0.821922	-1.22131	0.570184	0.234449	1.03959	-0.268817	-1.47104	-3.34507	-3.87458	-2.4177	-2.16225	0.816153	1.6878
2011-09-23	-5.95803	-10.2851	-8.35106	-12.8248	-2.02612	-4.94205	0	-8.21737	-6.16179	-5.80808	-10.0119	-8.74654	-6.92318	-0.34051	3.24268	-1.90223	-16.6265	-6.83506	-22.4688	-8.52938	-10.5057	-4.42055	-16.3258
2011-09-30	-0.998187	-1.13001	-7.53494	3.37391	-1.17648	-3.55038	-8.3743	-4.24887	2.18827	-4.24152	-0.820142	1.72805	-0.323102	2.31514	0.329526	3.90097	-4.81231	-3.59276	-6.71178	-8.86095	-7.07286	-1.92138	-3.73615
2011-10-07	1.23488	-0.351494	2.57525	0.988342	-2.39532	2.6653	-2.43915	-4.34851	-4.09696	0.518584	4.66582	5.72112	2.55605	0.642282	2.50162	0.919245	4.90079	2.10346	6.1849	1.18422	-0.817666	1.84205	7.15275
2011-10-14	-1.14413	4.63146	6.71833	-1.4399	5.02321	9.67754	8.57245	9.89399	9.68372	3.55668	4.8387	4.72943	7.00438	1.46105	0.12826	0.781254	2.45947	1.18053	-0.968001	1.55746	0.817666	-0.545642	-0.158814
2011-10-21	0.238851	0.69502	2.81269	-3.16624	-1.4514	1.59907	-0.568183	-4.19297	-4.68568	3.27361	0.448302	-6.07658	-1.38206	1.13933	0.341224	-1.17418	-5.40045	-2.14511	-2.0286	-2.80789	0.325204	-3.58569	-0.398143
2011-10-28	3.50223	-2.53319	0	7.80889	-0.881063	0.0299072	-0.858374	0.33529	-0.62598	2.07179	6.79448	-0.663969	1.51269	0.450693	-2.19553	-1.05542	13.5185	6.35824	10.9961	7.58567	6.74766	3.4374	4.67618
2011-11-04	-1.95977	-2.14373	0.153965	-6.18712	-0.591718	1.243	0	0.083647	-2.62441	0.628933	1.00225	0.208421	0.0978633	1.36114	-2.15582	3.90167	-3.96076	0.637964	-2.05775	-0.338202	-1.0679	-4.67375	-4.14567
2011-11-11	-6.32188	2.40913	-2.02027	1.20446	-2.40252	-2.92545	-6.83773	-3.92207	-1.42019	-2.21879	4.89619	-3.22189	3.46077	0.442618	-3.23155	-3.24072	-2.99581	1.17941	1.39578	0.276796	-0.153492	-0.479617	-4.46322
2011-11-18	-2.77879	-0.388132	-4.49514	-2.81561	-7.5746	2.70523	0.613499	-0.435731	-3.95968	-1.77854	-1.34244	-5.85685	-4.77356	0.0840866	-3.73208	-0.660941	-1.5839	-2.93268	-7.61759	-2.11057	-6.83348	-2.43321	-2.35107
2011-11-25	-3.45842	-0.63137	-4.02064	-6.15141	-1.65293	-0.0878134	-4.6957	-3.91858	-4.12295	-3.31705	-0.781174	0.618061	-3.2911	0.788367	-0.0834774	0.264901	-4.0089	-1.91748	-0.782109	-4.16327	-6.10359	-5.40193	-4.07512
2011-12-02	-6.13868	0.293082	-0.171086	0.708704	11.0348	0.551128	0.956945	1.44277	2.36438	5.4156	4.10407	5.93049	1.5919	0.33301	2.93897	0.659198	8.72224	3.20869	2.84849	1.94307	13.2438	3.31126	4.55541
2011-12-09	-7.08346	-1.38554	0	0.044828	-5.52288	-4.22483	-1.92314	-2.63054	-0.607641	-4.24207	-1.56713	-0.963681	-2.65593	0.331905	-0.197136	-4.02199	-0.897469	-1.77953	-1.91069	-4.12497	2.57006	-2.34107	4.73396
2011-12-16	1.7411	-4.6949	-1.55309	-7.18782	-0.950879	-1.21548	-0.324149	2.09194	-1.05034	-1.85035	-6.06561	-4.47114	-3.86964	-0.428918	-0.698896	-0.962207	-6.13568	-7.37871	-8.77471	-4.93251	-7.11273	-1.92364	-0.269179
2011-12-23	4.31926	1.23093	5.58048	0.432485	3.75044	2.20568	4.13413	2.66446	1.74448	6.72936	6.38702	7.67969	3.35069	-0.570119	-2.35361	4.8527	4.04794	0.802324	-0.784318	-0.704725	1.11555	-0.47356	-0.242882
2011-12-30	-3.86653	0	6.06246	4.59205	-1.54563	1.01165	0	3.53028	-0.824836	0.316957	-0.896506	-1.32379	1.17243	0.542384	-2.16545	-0.792607	-0.545283	-2.025	-3.30637	-4.33594	-0.158604	3.93019	1.10172
2012-01-06	-3.73325	-0.167211	-2.03291	3.06676	-5.11293	4.5744	3.96999	-0.934983	-0.0436015	0.630917	2.72486	3.02001	5.66441	2.36434	0.317461	-2.00944	-0.27376	2.91844	2.58485	4.05265	0.316957	1.18464	0.213561
2012-01-13	10.9674	2.76849	-7.03479	-1.11658	-1.98682	2.00312	-2.11808	-3.12254	2.02899	-4.01016	-2.86661	-0.0972885	-1.27141	1.91849	2.56347	1.47753	5.42219	0.795618	2.8889	4.77765	-0.794285	3.45987	4.43358
2012-01-20	0.168104	0.85227	3.16957	2.05597	2.96562	9.90839	10.2512	2.52297	3.44427	2.10534	-0.54867	1.50277	-1.42081	-0.0797607	0.946081	1.19286	2.66715	1.43023	3.29519	2.53685	6.48375	0.362407	4.24533
2012-01-27	5.72914	-3.13608	6.36144	-3.21923	2.56424	0.929399	2.22459	2.96255	-0.123941	5.45732	1.33592	4.62859	2.72461	1.76634	2.09651	0.263158	3.64014	4.35572	8.98437	5.82565	2.21739	1.89913	5.93294
2012-02-03	-3.39431	-0.522476	-0.928799	-1.49931	2.19101	-3.18233	-0.054003	1.40789	-3.6628	2.54695	-1.69315	-0.41792	0.934737	0.358669	1.52133	0.524248	0.325509	0.656808	-0.683814	1.35888	3.87145	2.33874	-1.83705
2012-02-10	-7.11335	0.887126	-1.72553	-4.27602	3.04902	-8.06676	-0.854416	-0.32949	2.49854	-4.23024	0.895771	2.15569	2.2209	0.0715796	-0.443712	-0.787406	-0.920608	-1.19478	0.268137	0.489597	-1.9887	-0.19668	-2.85666
2012-02-17	7.56989	-4.1141	1.56989	3.66298	1.78576	0.721083	3.76899	3.08717	-0.251256	1.53142	4.54646	0.743646	-0.0627746	1.42094	-0.697983	2.08613	-3.50913	-0.113873	-1.49883	0	0	-3.18869	-5.3571
2012-02-24	0.817135	0.422998	-0.468385	-4.91035	-0.888895	1.61584	-0.262674	0.876151	5.66458	-0.304414	5.75726	4.14648	3.63789	0.364882	0.515377	-0.387848	4.59356	3.29128	6.88519	4.53538	2.40976	5.22911	2.764
2012-03-02	-1.21786	-0.948668	2.32029	1.11489	-2.10534	2.96478	2.15443	4.04095	-3.01652	5.48692	-2.50858	-1.70255	-2.91835	-0.0511313	0.0114227	0.64558	0.283125	-3.68444	-1.6487	-0.585139	-0.140154	1.19559	-3.53126
2012-03-09	3.00971	-5.16032	-1.3857	0.468892	-6.5958	-2.2982	0.659374	0.152207	-5.71344	-3.824	0.672648	-0.0548856	1.36225	-0.0383656	-0.114286	-3.53671	-0.881192	-0.20447	-3.82696	-2.91774	-3.27898	-2.40565	-0.90265
2012-03-16	-5.72467	-1.95547	3.65337	-3.29218	12.4972	-1.9243	2.0126	2.99648	6.4052	2.80876	-0.345101	1.68443	0.735297	-0.416574	0.0342994	-0.937716	0.340516	-3.2759	-3.39221	1.32055	1.86653	-2.20631	-2.09432
2012-03-23	1.97553	-3.68539	-3.80853	2.73889	-0.286944	-11.2911	-0.502514	-0.592156	0.566116	-0.878483	-0.562168	3.96286	-2.75431	-1.07181	-0.148716	-1.76515	-1.45824	0.501496	-0.959611	-3.64339	-6.6152	-4.41689	-3.91149
2012-03-30	-2.61337	2.62621	-0.1554	4.43521	3.66755	-0.493362	0	2.63752	-2.73878	-1.93028	-3.24673	1.27073	-0.471773	-0.0779271	-4.26841	-1.93644	0.793749	0.0360685	0.341562	1.41237	-1.06953	-0.92462	-1.94451
2012-04-06	-5.21144	-1.23054	2.30602	-6.11368	1.10194	-2.00148	5.15452	2.42869	-0.623573	-1.5106	0.252036	-0.50454	-0.284136	-1.11711	-1.22612	-2.25998	-1.09751	-1.88201	-2.03545	-2.97052	-2.48846	-1.54771	3.20204
2012-04-13	3.84989	-1.1399	-4.50737	5.2911	-0.274349	-8.25994	4.9018	0.141044	-3.65221	-1.84337	-0.436618	0.612971	-0.0316206	-2.04414	-0.290698	0.427656	-4.09425	2.19226	-0.348598	0.501254	1.25197	-1.08765	-0.517501
2012-04-20	3.508	-0.34952	-2.57663	-1.81962	-3.06858	3.30637	3.35978	0.632247	-5.78711	3.50379	0.716988	-7.26248	-0.889459	0.694911	0.254407	-0.142349	2.38563	-1.65414	0.47506	-1.32119	3.51449	1.02474	-2.7968
2012-04-27	2.20811	-1.63261	4.77798	-1.20376	2.79348	-1.77524	4.09982	3.4415	-2.17752	-0.450113	1.22819	-0.243076	1.48855	-0.889549	0.205475	-2.89037	3.8567	1.36672	-1.08006	-0.380711	1.63816	-1.76501	1.64326
2012-05-04	-0.978936	-0.433094	0.465478	-2.68562	0.549452	-17.2449	1.46907	-0.951741	-0.705056	-6.36367	-6.26711	-6.82121	-5.85833	-0.674084	-1.36156	2.31894	-3.693	-1.57955	-3.84162	-2.77169	-2.08963	0.562086	-2.94345
2012-05-11	0.94671	1.97814	-6.06246	-8.72017	-2.49666	-0.649018	-3.82212	-5.33086	-1.95291	-1.29034	-2.52944	2.27376	-1.64682	0.579985	-2.65425	0.143164	-1.8403	-3.03378	-4.02966	-4.27301	-9.15465	-1.48873	-2.18588
2012-05-18	-1.71621	1.35498	8.81073	-6.98476	0.839166	-17.4136	1.92932	0.359583	0.90975	15.1829	-4.82124	-3.85295	-4.11609	-0.222155	1.55893	2.26318	-5.07543	0.384999	-0.937344	-0.684465	0	0.926648	-2.17528
2012-05-25	-6.29996	-4.72788	-9.4708	-2.1854	-9.94972	7.436	-0.63898	-1.6649	-3.7887	-7.22858	-0.955264	-0.932548	-0.247481	2.62727	5.38392	-1.12519	-0.403305	-1.83587	-1.36964	-2.29256	-2.51059	-2.04485	1.32843
2012-06-01	-2.47952	-4.87416	-4.22717	-3.85905	-7.67149	1.55064	-3.92207	-2.58794	-2.55717	-8.44251	-8.60089	-6.76807	-6.88665	-0.019696	-1.45281	-0.283286	-3.96223	2.83755	1.29986	-1.13075	2.84063	-1.51508	-5.73309
2012-06-08	5.45528	-1.62371	7.96441	3.49013	6.12107	1.26671	6.86965	6.03161	2.80439	2.73549	1.0882	2.68899	1.69209	1.84757	4.52429	0.988011	-1.22818	-1.55988	-0.946877	0.708218	0.983614	-0.279163	4.99725
2012-06-15	1.99446	-2.49672	-1.60775	6.03811	0.312013	-5.34917	-3.37585	-3.15212	1.27578	-1.27797	-0.0594849	-0.46119	-1.16259	-0.808987	5.73416	-3.13863	2.91935	2.55717	0.911967	5.22456	3.05245	-2.4117	-0.444116
2012-06-22	-5.85395	0.909386	-0.324676	-9.31413	2.46166	5.78254	3.99633	4.41353	-1.62206	8.91527	-5.75575	-7.45066	-3.61022	-0.651935	7.61614	-0.145033	-2.45359	-4.11359	-6.90178	-3.96227	-3.87145	-3.22899	-1.64551
2012-06-29	8.03218	7.25328	8.11678	0.730597	5.90142	5.09647	2.44411	4.36036	6.05663	9.39724	6.95054	3.94153	6.28995	-3.48064	2.11674	2.72028	4.99479	2.24492	2.76719	-0.488999	-5.0601	0.589807	0.930798
2012-07-06	-1.67503	1.95185	9.5719	3.80885	11.1075	3.8803	10.1328	3.85795	4.55867	6.22769	-0.790985	3.06827	-0.515465	-1.02104	-1.71952	-0.566574	-2.06559	-0.628631	-1.42938	1.52887	-0.17316	-0.547562	-3.52835
2012-07-13	-1.42923	3.13146	4.52807	-6.23414	-1.03094	-4.18356	2.33613	3.59094	2.33439	4.42877	3.24189	4.56704	3.26826	-2.06692	-1.6488	-2.00868	2.2896	0.282462	0.808828	-1.80937	0.690849	0.994615	0.030955
2012-07-20	0.994192	1.9473	8.8421	3.85572	4.55775	-10.3975	9.48256	10.2262	3.25511	9.41061	4.93637	1.10282	4.43741	-4.12091	-4.19772	1.72418	-2.17685	-0.702279	0	-1.12996	-0.690849	-0.433052	-1.27708
2012-07-27	3.99894	-4.6381	-3.27104	-1.09734	-5.33799	0.0513388	-4.79827	-4.74782	-4.56976	-5.16969	-1.57414	-2.11309	-1.27259	-2.36414	0.993264	0	0.185431	2.24883	0.620553	0.141945	-0.521287	-1.15462	-0.439837
2012-08-03	2.59863	-1.48294	0.368777	-0.0302343	0	1.63066	1.84724	-1.41595	-2.14007	-0.462429	1.39924	6.20647	1.27259	1.71424	-0.877749	0.992212	-1.55026	-0.963399	0.941695	-1.4286	-0.174368	-1.72849	-1.71487
2012-08-10	1.46079	-3.55488	-1.11044	7.68042	3.33792	-4.31608	-0.835427	-0.178412	-5.70259	-0.581059	1.67086	1.19503	3.06267	0.285307	-1.78964	0.702744	0.576235	1.26604	1.36057	0.645395	0.868815	0.58904	-1.35442
2012-08-17	-0.469373	-3.5053	0.864737	-4.73071	-0.76046	1.58228	0.835427	1.06573	-1.58695	-0.467291	3.23941	0.117381	2.09913	1.40725	-2.17106	0	0.649299	-0.321196	-0.2849	3.92482	2.39328	-0.243815	1.48246
2012-08-24	-2.61328	1.07005	0.9792	5.38663	2.01518	8.58255	3.97166	4.15285	-2.90161	-0.234467	-0.22943	1.9681	0.679285	0.967715	-4.14683	-0.98523	1.25659	3.21739	8.57326	5.48266	8.26381	2.45385	5.26519
2012-08-31	8.27247	0.732053	-1.59611	0.554863	-0.249688	0.843299	4.36484	0.450959	1.09182	-0.470589	0.717818	2.93086	2.29456	-0.157064	-7.03678	1.26495	-0.282264	0.311042	2.42534	-1.30978	-3.15982	-0.266573	-3.23853
2012-09-07	2.33855	-1.02776	-0.123839	-0.861356	-1.00503	6.86091	0.0306115	-2.39055	-2.5495	4.04446	-0.0622149	6.95863	-0.949675	1.30609	-8.04498	0.139567	4.53017	3.67391	7.03126	4.88843	3.77998	5.44073	3.39016
2012-09-14	-0.755981	7.73691	-2.25573	-3.89808	0	2.72805	-5.02267	0.172662	3.77591	2.12893	2.59037	-4.55579	2.72958	0.940556	-8.59051	0.69493	4.94974	2.12401	2.73185	6.3243	8.15871	10.8933	7.44326
2012-09-21	-4.02318	-2.85133	-4.803	1.5118	-4.652	-5.12107	-5.68442	-7.83191	-3.11984	-1.11484	-6.57926	1.30013	-3.43179	-0.539387	-1.80447	-1.25437	-1.02888	-0.12858	0.347122	-3.2947	-4.36751	-4.39041	2.2254
2012-09-28	-0.489283	0.86852	0.794706	-5.34165	0	-7.93197	-1.90875	-1.25158	1.34901	-2.84272	-0.497783	11.9575	0.702205	0.476492	8.25472	-3.13416	-0.794497	0.134216	-0.144488	1.57103	-4.567	-1.26971	1.63714
2012-10-05	-5.34669	-2.59515	-1.59578	0.870484	0.790518	0.521168	-4.61894	-3.19925	6.3918	-6.06246	-2.5379	-11.1672	0.602507	0.467274	6.18646	1.29405	1.01173	0.619117	0.317598	2.54527	3.82017	-1.4089	-0.951741
2012-10-12	-0.581477	-3.09698	0.267738	0.0149421	4.6162	-2.36539	1.2647	-1.90357	-7.18901	2.42143	2.15749	-7.18783	1.72391	-0.139256	4.47391	-0.429492	-1.98768	-1.23472	-2.92504	-1.94754	-2.58177	-3.57181	-6.92857
2012-10-19	4.34823	-0.406911	1.72304	8.31067	1.24535	0.399171	-0.540055	0.857808	0.697909	1.89579	-2.01294	-9.51397	-2.7727	0.887908	1.75887	1.14124	-1.50854	-1.6598	-4.77222	-2.71838	-1.86341	-1.38984	-0.734757
2012-10-26	-3.47339	-1.83427	-3.47629	-6.79818	-1.49629	-1.11137	4.93058	1.75843	-4.36618	-1.06196	-4.73246	-1.3176	-1.05991	0.0828386	1.75194	-1.4286	-2.40382	-1.13992	0.372903	-4.50922	-5.47641	-1.34121	-5.73667
2012-11-02	2.01776	-1.18956	0.407333	-3.16965	-2.03053	-5.05025	-0.344234	-2.21941	0.672358	1.06196	-1.1011	-4.53324	-4.59205	-0.151923	-2.015	-0.288185	-2.04122	-1.97402	-2.83127	-0.578222	0.660068	-0.547047	-0.187617
2012-11-09	-3.47332	-1.5433	0	-1.09975	-4.18909	1.45173	-5.12933	-5.00781	-1.45382	2.66374	1.3803	13.1604	1.47654	-0.366947	-1.41077	0.431966	-1.23116	2.93853	4.00304	0.450017	0.65574	-0.0137146	-0.156617
2012-11-16	1.27744	-2.10534	-1.63938	6.5824	0.267023	8.83523	-5.02431	-4.97969	0.36544	-5.52107	0.625364	-3.17022	-0.534403	-0.479751	-1.94967	-0.28777	0.366005	-1.06777	-0.584168	-0.321234	1.78142	3.22543	0.0626763
2012-11-23	4.07817	-1.69874	1.77479	-1.91643	3.14987	6.93805	-0.38241	1.95022	-0.104275	0.722025	0.449232	-2.4658	2.44802	-0.314125	-3.45166	2.70095	2.15867	2.0162	2.07514	1.9121	5.38982	0.252006	4.05212
2012-11-30	-0.497011	1.01676	1.34411	1.29617	0.515465	-2.07667	4.49514	1.98307	1.0895	0	1.74314	-1.82506	-0.787406	2.21947	1.7785	-1.5548	2.76061	-1.7329	1.58805	1.75224	4.09741	5.79014	6.0129
2012-12-07	-3.10808	0.0966507	-1.88685	-0.536817	5.98682	1.20415	2.53178	2.56158	-0.154919	2.01787	-3.5523	-4.92995	-3.41742	0.198108	6.68416	-0.285307	0.418986	-0.919251	-1.86024	-0.747201	1.88003	-2.03328	-2.4374
2012-12-14	0.847723	-4.48335	-0.545704	2.22983	-3.1983	9.68324	0.534284	1.55988	-1.19575	-5.68129	1.01299	2.04288	1.42134	0.469788	-1.66255	0.995033	0.392377	-0.328342	-2.08086	0.809217	0.286123	-0.757647	3.70413
2012-12-21	-4.85734	1.05142	-4.04801	1.53882	-6.45385	-2.86415	-3.61703	-4.05136	1.45382	-2.77445	2.15456	3.45605	1.79825	0.872423	-2.1056	1.26495	-2.98106	-2.39547	-7.07835	-5.08692	-3.63676	-1.18766	-2.98106
2012-12-28	-2.45438	2.10037	-1.14614	0.53095	-1.88431	-5.94656	-1.29752	-0.491747	0.719058	-1.93679	2.75093	1.4757	0.788959	-0.709534	0.378395	0	0.752843	-0.0175083	-0.666003	-0.392157	4.20657	-0.757382	-0.868312
2013-01-04	-1.49368	0.293266	-1.74423	-0.923988	-4.16149	-11.0463	-5.56232	-3.14761	-2.74985	-1.44454	2.67727	-0.237349	-0.689998	1.42744	0.71624	0.139567	2.36798	-0.51879	-0.771428	1.94559	-2.15371	-0.591601	0.897127
2013-01-11	1.50543	2.75491	3.88259	-0.338124	1.9636	0.0557785	-4.84943	0.65194	1.97923	1.31408	0.51414	-2.4995	-0.495787	0.825571	1.81006	-1.82975	-0.472873	0.74134	1.76878	4.33621	0.650997	-2.09188	1.31656
2013-01-18	1.08232	1.83837	2.9189	3.15326	4.0822	1.4837	2.45411	3.75531	-4.26717	5.09016	2.1247	2.65189	1.67574	-1.78618	1.13396	-3.76311	0.233605	1.61648	5.15744	3.08835	4.02739	-1.00136	-0.199232
2013-01-25	-4.72442	-4.22603	-0.687288	5.70065	2.89113	-0.458899	0	1.03771	-0.32345	-1.50003	-0.482282	2.80056	0.195313	-2.03198	3.05367	0.734757	-0.474008	-1.45395	-1.77501	0.0596125	0.414652	-2.10274	-0.973383
2013-02-01	1.03921	1.1455	2.45244	0.0129157	-0.259404	6.99818	2.78903	2.31303	2.61139	-0.631714	2.39874	6.5184	3.57751	0.754876	0.534001	0.874641	3.15983	0.372216	1.96333	0.53492	2.72126	1.6256	6.91846
2013-02-08	0.808605	-2.38	-3.28347	-1.95624	5.55699	-1.80892	0.196271	-1.76395	-4.02523	0.757579	-1.81193	-0.959551	2.4486	-0.575936	2.49551	-0.582243	0.0605547	-0.0569433	-1.1353	1.5878	0.134138	0.843657	-1.65114
2013-02-15	-3.29958	-2.043	-1.82461	0.40744	-0.492612	7.35203	0	-1.9351	-2.10301	-1.64874	0.250444	2.78813	-1.07743	-2.36566	-2.48418	-0.879771	-1.06504	-3.75708	-5.14101	-2.24198	1.06668	4.86611	0.326976
2013-02-22	-0.441879	2.19436	-0.85349	0.874965	2.19789	-0.42422	0	2.41308	1.93858	-4.04491	-2.99382	-1.3715	-3.59207	-0.997709	-4.30622	-1.33434	-5.00253	-2.06812	-5.03272	-3.95549	-2.96119	-1.45608	-7.95214
2013-03-01	-2.81173	0.196434	3.78461	3.34984	-1.70528	-6.60663	-2.18046	-0.47798	-0.494914	1.05961	-2.62214	1.05104	-5.26958	-1.2523	-6.02107	1.18696	-1.29807	0.319799	0.245485	-2.00634	-1.51414	-4.28102	-2.20378
2013-03-08	1.63492	1.37923	-0.690134	1.69559	1.94653	8.93049	-1.00706	1.83118	3.36075	-4.85926	1.42297	-6.52273	1.2435	-0.16576	-2.08182	-2.08651	0.487536	-0.248644	1.42586	0.568363	6.44518	2.1099	0.779848
2013-03-15	-0.000930635	-2.31956	1.51206	5.63614	2.85055	3.95361	-4.98028	-2.93236	1.0077	4.72742	1.59572	-0.0712601	-0.636625	-1.05138	-0.759677	-1.36469	0.181406	1.1781	-0.345901	0.314367	0.64809	-0.96827	0.981129
2013-03-22	2.25856	-1.49686	0.950448	-2.84447	0.467291	-0.893052	-0.854706	0.827021	-3.27195	-1.19444	-0.0856073	-2.36663	-2.795	-1.56477	-1.95778	0.304878	-1.33911	0.945151	-0.695413	-0.819418	-2.61795	-1.36057	1.46846
2013-03-29	0.616344	0.685964	-4.27947	0.132156	0	-1.06877	-1.07876	-2.57227	-2.76413	-7.19536	4.01837	1.22981	0.791879	-0.0888889	-2.21224	1.5106	-1.48038	-0.785228	-1.19342	-0.253486	2.09981	-1.11579	-2.89875
2013-04-05	-1.61763	1.25183	-9.61568	0.407381	-9.78776	8.14336	0	-2.7849	-0.280663	1.56587	-4.71666	-8.97431	-3.34759	3.87389	4.99381	-1.20665	-1.78351	-1.8857	-4.47728	-2.89689	-6.71393	-1.52142	-4.35518
2013-04-12	5.12935	-2.30971	3.50913	-4.11309	3.78355	-2.17468	0	3.97497	1.34005	3.47016	-1.66317	-2.43303	-4.27446	-1.5012	4.24154	-1.22139	-0.0284709	-4.02038	-2.50527	-1.1166	-0.626961	0.056243	-0.628933
2013-04-19	2.89552	3.1933	-1.81548	-0.0249221	0	2.5493	-0.217155	0.969537	0	0	-3.55925	4.4261	-2.92924	-2.677	0.245429	0.306749	-5.77592	-6.93096	-13.0022	-6.05833	-5.53103	0.951322	-4.38497
2013-04-26	1.21393	-4.80536	-1.22889	-2.48578	5.06743	-5.74185	4.04741	0.343998	-2.81233	-3.47016	5.08218	0.908897	1.62544	-0.133889	-0.935852	1.51979	0.530125	5.14144	2.04873	3.98952	0.589103	-0.0278513	0.230453
2013-05-03	1.93681	2.66226	6.14425	3.05742	-0.945634	3.55463	1.24483	0.752655	2.97858	3.60649	2.7892	-0.490072	2.37136	0.977713	4.48766	0	3.45146	-0.66204	0.589724	1.20645	1.89097	-3.37095	0.131449
2013-05-10	-4.37958	0.970844	-3.40018	2.73789	-3.13657	-0.506795	-3.78196	1.42134	-0.499585	-1.37176	0.586205	1.33292	0.620553	-0.977713	6.87878	-2.44287	1.53093	-3.07012	-2.20816	-0.735543	1.14614	2.33496	0.882791
2013-05-17	0.0347685	-2.65182	2.96318	-2.29278	-1.23306	-1.03748	4.60332	3.43495	-3.16589	-2.37607	-0.0939801	1.65756	1.37335	0.778503	2.13041	-0.775799	-1.10733	-4.25001	-4.29891	-1.35137	4.72967	-0.267738	-3.54518
2013-05-24	-2.18059	-5.31823	0.582243	-4.82722	-3.27898	3.69804	7.29387	-1.96728	-0.0574548	2.23786	-1.98361	-3.51244	-2.10381	-2.79346	1.05377	-0.938974	-0.0653179	1.69133	0.892465	-1.02565	-0.955639	0.855369	-0.134998
2013-05-31	-2.03787	-0.098912	0.867057	-1.9215	-1.81117	2.88462	0	2.22668	-1.73917	1.10042	-2.05638	-1.87492	-2.82547	-0.65529	0.586574	0.938974	0.151198	0.376226	-1.16176	0.274537	2.03673	0.615349	0.134998
2013-06-07	6.91806	-0.322141	0.143781	6.51405	8.98359	-0.132447	-2.50254	0.64558	-0.763138	-2.07333	4.4466	4.8021	2.67873	2.28992	2.76863	0.311042	-1.14307	-0.797288	-2.0432	3.10416	1.33513	3.0131	1.5063
2013-06-14	-4.8815	-3.92306	-1.4472	7.93671	2.12523	-2.51464	-2.16757	-0.96994	1.81027	-2.40294	1.77379	1.7913	4.17027	1.70387	3.1461	-0.936044	-1.98895	0.369878	1.1856	-3.86096	-3.50913	-1.60482	-4.93717
2013-06-21	-3.86712	-1.63085	1.4472	-7.35722	-3.08447	-3.77078	0.199005	-0.913844	-0.930239	1.98307	-4.19598	-5.3099	-3.84041	0.351958	4.33486	1.4008	-3.91995	-7.2473	-10.2042	-5.90289	-8.00427	-3.44501	-1.76061
2013-06-28	0.32364	0.56687	0.143575	0.527253	-2.19254	-9.69432	1.77345	2.58914	-0.644596	-8.17974	2.68197	-1.82194	-0.476803	0.80919	-0.741779	1.98935	-0.799057	-5.9428	-2.54208	-3.5798	-4.41136	0.890025	-2.62747
2013-07-05	1.74122	1.30461	-3.95077	1.22761	-3.76456	4.08395	-2.37165	0.890591	-1.18275	1.2103	6.75112	6.43686	5.64637	2.06949	-0.203262	-0.76046	0.762204	-0.0452617	-3.40436	0.756433	3.96393	0.308946	-2.99856
2013-07-12	1.92368	-0.00858406	1.92171	-2.40858	0	3.73843	-0.400802	-2.37115	-1.31738	4.41248	2.64206	8.09573	1.0026	1.26499	-0.126036	0.152555	2.292	5.21679	5.54403	5.5692	6.78961	0.587168	3.47155
2013-07-19	4.9854	3.60825	-0.14652	0	-0.770222	3.92319	3.93752	2.56096	0.840341	-2.47646	2.01082	-1.84519	1.40054	2.48981	-1.57422	-0.305344	-0.451321	1.15508	-1.83118	1.34515	3.70159	-1.63017	2.75657
2013-07-26	-1.05714	-1.29174	-13.6468	1.58373	-3.94269	-0.511927	0	-14.9002	0.595949	-1.33632	-3.04592	-1.19433	-3.10049	-0.246897	-1.09995	0.305344	-0.87959	1.79563	1.17378	0.421053	-1.62826	0.0849738	-2.21359
2013-08-02	-1.67998	-2.23928	-2.38106	-0.317189	0.534761	-1.39828	-15.1901	-3.43317	1.88352	2.80048	2.05959	-0.953612	1.97477	2.61603	0.248793	-1.38145	2.04524	-0.373915	1.0096	0.558661	-0.136893	0.296841	1.07721
2013-08-09	7.10543	4.01836	0	4.10566	5.70103	-5.65063	0.894861	0.681047	0.986373	-6.76441	-0.845155	-2.16732	-0.61941	0.500451	0.870862	1.53377	3.70406	-0.171465	2.77383	3.8256	1.22534	0.380363	4.74287
2013-08-16	0.844655	-1.72038	2.21286	2.45582	2.73309	-1.7285	3.93064	5.21602	-0.289101	-3.64252	1.44184	1.844	2.85831	1.40121	1.04877	0.909097	1.62055	4.25053	12.6484	2.1221	3.06486	0.420935	2.15642
2013-08-23	-1.17115	-5.75382	5.88405	-8.88544	-6.32322	2.76698	6.42708	4.13659	-2.81874	0.482704	-1.02776	2.2382	0.768592	2.09782	-3.09941	-0.302115	-0.527042	2.04613	2.34003	0.914441	-1.32102	-1.28234	-3.21789
2013-08-30	-0.956437	-0.632434	-6.89929	-0.0875821	-2.64566	1.28247	2.18479	1.90482	-0.657307	2.37918	1.39889	-0.267023	0.729688	-0.173684	-5.40337	-0.454891	-3.5464	0.0944902	-0.8446	-1.57277	-3.38098	-1.58677	-5.12027
2013-09-06	5.04123	0.783271	-7.4108	-1.12028	-6.07922	-2.94557	2.3302	0.872196	2.54527	-2.37918	2.41549	-2.53521	1.11733	0.667354	-2.96278	-1.06953	0.75658	-0.750504	1.05464	-1.06243	-3.92757	2.33562	1.29591
2013-09-13	1.30069	0.944194	-15.2016	4.22589	-2.30558	5.04129	3.02481	-3.67388	2.02495	0	-2.11034	-2.99953	-0.65574	-0.275385	1.6592	-0.307693	-1.70775	-5.19924	-8.81183	-3.87936	0.142959	0.505477	-0.753908
2013-09-20	0.547343	-3.37622	-5.47782	-1.04905	-1.76475	-10.1908	-6.7398	-9.13679	0.343054	1.11733	-3.38984	-3.21624	-3.71964	0.613773	4.70576	0.767463	3.44886	1.58731	0.639564	0.415513	3.64697	0.0839983	1.14656
2013-09-27	1.07869	-1.21557	-2.278	-0.147257	4.9214	3.39935	2.55668	-1.37617	-0.515023	6.89929	-1.77303	-0.978765	-0.61644	1.56836	-0.0615827	1.51748	0.405708	0.134442	-0.547947	-2.16565	-0.137836	-0.561326	-0.356888
2013-10-04	-0.895902	0.705551	-3.51736	2.90472	0	-1.49944	6.02819	-2.65226	5.30703	-0.892863	0.938611	-2.08826	1.0593	0.344515	-1.05275	0	-0.750822	-2.16391	-1.0587	-2.14141	-2.65564	0.896616	0.463707
2013-10-11	4.50038	1.22512	0	0	0	-0.348717	-1.28797	0	2.25938	0	-1.61169	2.68692	0.947233	0	0	0.600602	-0.753018	-3.31893	-1.8212	-1.23414	0.846267	1.24742	-0.929574
2013-10-18	-0.949774	-2.53941	0.476191	-4.66393	3.60649	-7.75589	-1.49257	0.551834	2.26147	6.78961	-1.28055	-0.355827	0.537275	0	0	-0.902262	0.6181	3.71628	3.24553	4.91727	3.451	-1.35906	1.99153
2013-10-25	-0.31411	-4.31028	-0.237812	-4.47302	3.21744	1.99718	2.41423	0.938974	-1.99586	-1.26495	-3.50063	-2.63247	-3.68391	3.16959	-5.30532	1.64798	-0.597203	2.28174	2.56713	0.138985	-0.544219	1.63416	2.64088
2013-11-01	-2.3447	-2.93058	-1.68071	-1.05112	-3.76389	2.35416	-3.92941	-2.6037	-4.11536	-2.00007	-2.95917	-1.78148	0	0.0242292	-2.47008	-0.745716	0.801239	-2.76989	-2.79549	0.898727	0.544219	-1.3553	-0.0686106
2013-11-08	0.502549	-0.92931	0.241838	-1.83956	2.43584	5.7018	-2.7081	3.0699	-0.832644	-2.77999	0	0.20335	-0.697353	0.187578	-3.09784	-0.450113	-0.975516	-1.89197	-2.45326	-0.482926	2.67754	-0.867017	-4.59972
2013-11-15	2.46903	1.47486	-1.45988	-0.620785	0.267023	5.14746	2.32569	-1.40518	-2.4832	-2.25066	-0.80697	4.41618	2.4539	-0.278467	-2.04506	0.599702	-2.34366	0.185769	-2.61111	-0.554786	-3.76895	-0.704725	-0.612725
2013-11-22	2.19783	0.454008	0.488999	1.03698	4.94249	0.616226	-3.50913	3.01997	-0.228833	2.39892	0.775239	1.22831	3.12578	-0.0667051	-2.64385	-1.96233	1.38672	-3.3432	-4.325	-2.96423	-1.10346	-0.538932	-1.97159
2013-11-29	-0.228846	2.67201	-0.2442	0.133887	6.62819	1.14031	8.00427	0.152439	-1.32605	1.32452	-2.11682	-3.02296	-0.0330961	-0.133544	-1.85984	1.96233	-0.618278	0.63632	-1.31448	-1.44303	0.415226	0.227273	-0.33241
2013-12-06	0.799912	-1.72135	1.45634	1.06469	-7.64861	-1.39114	-1.66209	0.380084	-2.94485	-0.439561	5.18982	2.25932	0.725597	0.70214	2.3677	-1.50605	0.924234	-1.43038	-0.561369	-0.656218	2.32092	1.57661	1.79657
2013-12-13	-0.708311	6.53186	-2.43915	5.56128	1.2739	4.1881	-0.186393	0.303031	-1.99222	-3.43574	-1.24905	-3.73754	-2.90069	1.20509	-2.14564	0	2.17774	0.0364144	0.713925	0	-2.45914	0.543215	2.4409
2013-12-20	1.66884	-1.84439	1.95605	0.20015	-3.87145	-4.2967	2.03146	0.0756144	1.09158	-2.30602	2.90736	6.10391	3.71889	-0.759732	-0.742118	1.05661	-0.385543	-2.50108	-1.27846	-2.89445	-3.23289	0.0138899	2.24413
2013-12-27	-0.188642	0	-0.729043	-0.300376	2.08341	-0.505375	0	0.151057	-0.0603318	-0.624027	0.833966	0.936742	1.80883	-1.44558	-1.65231	0.598804	2.0111	0.88206	3.0912	3.40521	1.55921	0.30509	-1.53742
2014-01-03	-3.53426	0.593914	0	0.799005	-0.516797	1.14639	-0.549956	-3.37714	-1.88857	0.156372	-6.48988	-5.8466	-5.15629	3.19562	0.654173	0.59524	-0.886178	1.66755	0.844726	2.15991	2.36286	-1.36626	-2.53178
2014-01-10	0.629769	3.68764	1.69291	-1.27645	10.7948	5.81552	-7.24126	0.855038	-3.25029	-6.28732	-1.36525	0.84266	0	1.24903	1.33277	0.739102	-0.0102317	0.789372	-0.545772	1.48465	1.22868	0.0561325	0.108284
2014-01-17	-0.617091	-1.30146	-2.1819	3.7815	1.15608	-3.99686	2.72921	2.82354	-1.98916	-0.500418	1.68504	-1.54531	3.44519	-0.163303	-0.882377	1.46201	0.588327	0.479433	1.43248	1.53206	1.34773	0.838228	5.85003
2014-01-24	3.27862	-1.11743	2.1819	1.32516	-2.56126	0.728339	-3.12525	-3.05601	-0.650197	0.666669	2.83305	1.55645	4.11476	-0.573671	0.435948	0.434468	-2.2217	1.17008	-2.93626	-0.276817	-0.268097	0.19458	-1.40485
2014-01-31	3.68562	7.13897	0.47847	-1.28879	9.65958	-0.069779	1.76996	-0.857037	2.89316	-3.72293	0.91654	-1.15755	1.70415	0.456863	1.99342	0.719946	-1.60764	-1.94842	-3.23354	-4.31926	-5.23536	-1.90642	-3.5831
2014-02-07	0.934124	6.13649	2.3586	0.411324	9.19954	3.09045	3.26012	3.53611	1.50946	4.05461	2.46051	4.4442	-5.94924	-0.874547	2.0858	-0.575541	1.30904	1.61641	3.88796	-0.217313	0.564176	-0.198328	1.13799
2014-02-14	1.3913	2.83153	-1.40847	1.53352	-8.98563	-1.91199	3.15718	0.376932	-0.25	4.53152	0.329522	1.9425	-0.0326105	1.143	2.13666	1.00503	-0.125261	4.1679	6.36601	3.35147	3.99778	1.68733	0.774925
2014-02-21	-0.772363	14.953	3.48467	-1.6785	5.40672	1.09652	-0.366301	2.67276	6.36386	1.41401	2.189	1.12117	-0.195886	-0.473201	4.18586	-0.142959	0.423862	0.246529	2.23473	-0.245743	-0.135227	1.71417	0.803779
2014-02-28	0.373176	5.34573	1.36057	0.277694	0	0.06821	0.731265	2.174	1.63079	-2.52778	0.340782	-1.57318	-0.787406	0.152136	5.90421	2.12322	-1.83337	0.436192	-2.23473	2.259	0.942768	-1.10255	2.44124
2014-03-07	0.824071	7.3355	4.406	4.32978	-0.609139	5.41566	-1.83829	3.72889	5.28807	7.99196	-0.0583374	-0.767431	-1.05961	0.844231	7.71878	-0.843887	-3.96163	0.761969	-1.18401	1.29739	3.94269	2.67995	3.83189
2014-03-14	0.432577	1.59179	0	0.184566	-5.44067	-3.51387	-3.01341	-4.80998	-3.51305	4.90012	-3.55395	-0.493404	-3.45446	0.808412	6.48073	1.26317	-4.701	2.97294	1.74739	0.271003	0.51414	-0.812792	2.86793
2014-03-21	-0.864062	-11.6296	-1.52012	0.494339	-6.66914	1.74527	3.93678	1.86653	-2.23826	1.25788	0.742975	-1.50591	-2.08921	0.0287513	8.17607	-1.54606	-0.0500703	-3.02835	-4.6966	-2.67414	1.14724	0.947618	2.2614
2014-03-28	1.08406	4.6013	3.22956	-0.0573559	3.83361	-1.52251	-1.29512	1.83233	6.0249	0.554018	1.74521	-1.74345	2.7418	2.62158	7.847	2.10239	2.9794	-3.29696	-3.03884	-2.67622	-2.30779	2.58027	-2.45218
2014-04-04	-0.580293	1.11491	2.09651	-2.30989	1.75443	2.14457	-4.18312	2.95859	-2.7141	-4.37614	-0.561882	2.03775	-2.04053	-0.257963	1.71778	-2.81313	-0.99967	1.06338	1.90387	3.02308	2.30779	-1.26852	4.20688
2014-04-11	0.716037	7.33157	-0.624352	-2.07636	-2.19789	6.23331	-0.975617	-0.816887	-2.09937	-1.30721	2.46058	6.23049	0.209424	0.117848	-1.98348	0.852278	0.685063	0.963473	-0.647251	0.690134	0.631714	2.24847	6.01039
2014-04-18	0.77374	-2.12897	-0.628274	2.38121	-0.22247	-0.0915864	2.32569	3.29442	-0.575045	3.44862	0.624972	1.63639	2.44545	0.363891	-3.75537	-1.13799	-0.0300143	-1.47873	-1.91635	-1.17608	0.877749	-2.12886	2.97262
2014-04-25	-1.92656	3.64011	2.48976	0.804528	-0.446429	1.31082	-1.54443	-1.06384	2.95476	0	-3.39247	-0.524512	-0.922926	0.0837872	-4.80998	1.42048	1.79247	0.243755	0.254259	-1.33102	0.498133	1.82936	2.85969
2014-05-02	-1.07719	-1.09985	-2.07047	1.15461	3.51685	-2.85886	2.6873	-1.14287	1.6107	2.7857	-0.756448	-2.52625	-2.36286	0.25651	-1.87597	1.53957	-0.406249	0.038393	-0.611311	0.492439	1.35721	-1.55083	-0.953296
2014-05-09	-1.7603	-8.60893	2.07047	-1.36387	-6.69893	0.368268	-1.52675	0.808085	-1.16377	0.274349	0.22953	-2.53497	-0.0703482	1.74455	-0.723598	-0.696867	0.590364	-1.11322	-2.64059	0.280309	-1.48151	0.26455	8.57106
2014-05-16	1.90191	0.495818	-4.8278	-3.12045	-7.67763	-3.10515	2.84379	-0.875721	3.72034	-7.68515	1.96423	2.22679	1.36294	0.83386	-1.37435	-0.280112	1.86608	0.447702	1.51005	2.41975	1.48151	0.290199	-4.52171
2014-05-23	3.39687	-1.60163	-1.08109	-2.40595	-1.25472	2.42548	1.66825	3.19601	-2.22654	-3.46159	2.60482	1.2065	-0.0347162	2.73036	-0.899984	0	1.39842	-0.0865955	0.412584	1.28946	1.45988	3.67251	2.97757
2014-05-30	1.35541	-2.5321	-1.75443	-1.84949	3.96091	1.02703	-1.85534	-1.2529	0	-3.74459	-1.54506	-2.30493	-2.31833	1.09251	-0.799825	0.559442	-1.46344	-3.79557	-3.66917	-1.28946	0.961546	0.253614	-1.80185
2014-06-06	0.303085	-2.90918	-1.11236	-0.944056	-1.46702	2.74786	0.187091	-2.34989	-2.27724	-0.637961	-0.0773994	-0.284415	-0.427351	2.16007	-0.0451243	2.07047	-3.27609	0.64468	1.48386	-0.754203	0.477328	0.80727	-1.96728
2014-06-13	1.3698	2.1005	-2.03397	0.113758	-5.31098	0.300943	-5.96905	-2.61543	0.727683	-5.08723	3.95669	2.27018	3.71321	1.67296	2.59292	3.35827	-0.24672	1.68759	3.20939	-1.10728	-2.89875	-0.503779	-4.35852
2014-06-20	-0.530666	-0.338344	1.58554	-0.964719	0.518136	-2.95645	-2.81709	-0.840341	4.68495	0.671143	0.427034	2.24331	2.27785	2.97672	4.10999	0.263852	2.38177	3.18949	6.41245	1.31353	1.58058	0.904984	1.80976
2014-06-27	0.907153	-0.385281	-2.0432	-3.70292	-2.88355	-8.38355	1.61947	1.18841	-3.08049	2.80315	-1.38988	-1.7051	-2.89875	4.04081	5.09345	3.74963	1.96149	0.308953	0.856333	1.56732	1.19906	-0.350966	2.78689
2014-07-04	-0.87608	-0.610338	-8.11902	-3.20092	5.43471	0.134539	-5.36211	-5.35269	2.27899	-2.63607	-1.60973	-2.35932	-2.20404	1.42394	2.78477	1.76105	2.61739	0.0833371	0.189304	1.60969	3.16742	-0.0753674	2.50535
2014-07-11	-0.439359	-4.55894	-7.48737	-3.97292	-2.55116	1.03366	-8.1633	-7.37697	-1.73165	-10.7403	-3.18103	-2.36972	-3.12582	-0.858454	2.66374	-5.24753	0.174404	1.1228	1.6413	0.199402	0.115407	-0.617636	-0.103146
2014-07-18	-0.205718	4.13014	-2.16811	-0.456101	0	2.41481	1.14287	-1.99289	-2.15181	-5.1489	2.28932	-0.467072	0.182315	-0.0466135	1.91127	2.97757	-2.63424	-2.09992	-3.26193	-0.599402	1.60186	-0.621475	-3.78594
2014-07-25	2.13767	4.16309	-1.93644	-3.37045	0	-2.24687	4.87902	1.51821	1.93323	0.390625	1.33935	0.151139	2.12659	-0.163319	-2.2461	2.51902	2.12412	-0.659841	-1.40336	-1.6162	-0.569153	1.16369	2.85281
2014-08-01	0.626869	6.23801	-3.40942	-6.32785	-0.258732	-4.54984	-0.43384	-3.88084	-3.45054	-2.16757	-7.26105	-3.94969	-1.5454	5.04944	-3.3799	-2.39156	-0.681877	-0.336194	-0.586512	-0.749578	-0.572411	-1.26552	-4.22879
2014-08-08	0.740749	-6.1556	0.863315	0.986773	-1.04168	0.243608	0	2.7644	-1.88631	3.52287	-0.255794	0.919709	0.613831	-1.29149	-3.70249	-2.97372	-1.10291	1.2763	-2.18046	0.885263	-1.62041	1.01369	0.838636
2014-08-15	0.234242	3.59082	3.93309	-0.625393	-1.05264	4.2736	0	-1.45398	-0.462696	-4.32287	-0.318096	-0.762723	-1.2679	-0.0539884	-4.86184	-1.98814	-1.72285	-0.47546	-1.20969	-1.98569	2.42087	1.29018	0.590923
2014-08-22	-1.36409	-1.79485	1.63938	3.28607	2.61111	-2.11457	0	3.43896	-1.40107	1.19762	-3.86618	2.02236	-0.365231	-1.83025	-8.26014	-0.268097	2.95968	-2.07486	-1.48151	-2.09651	0.567861	2.48292	0.427579
2014-08-29	0.309799	5.60895	-1.91524	0.966629	-1.8206	1.74788	0	-2.79014	-0.412372	-0.397615	4.44007	-1.25593	1.41692	0.151137	-8.08983	2.12491	-1.26894	0.750521	0.410889	0.563382	1.68449	1.91192	0.266312
2014-09-05	-3.59489	-1.02911	-5.39138	-1.91205	0	-0.418546	-3.99166	-9.04715	-1.6067	-6.16211	-4.75034	2.25017	-2.26204	2.60635	-3.51022	5.62089	-0.239282	-1.66449	-2.17625	-1.2721	-1.23251	1.44262	4.03964
2014-09-12	-0.598448	-6.15428	-6.00781	6.48066	0	-1.21391	-5.10552	-5.5494	-6.3779	-10.0195	-1.22913	-4.59766	-3.33927	1.53094	4.85656	-1.50191	-1.81492	-2.90521	-2.60031	-3.32641	-6.76248	-0.458905	-6.19026
2014-09-19	5.54413	-2.90582	-6.39195	-7.83808	0	-2.57295	-4.38026	-4.2031	-2.9853	-14.5987	0.270841	2.68789	-0.458892	1.10913	4.43129	-0.126183	0.250923	-1.05562	-3.61287	-1.18345	-0.726395	-1.77291	-3.45577
2014-09-26	1.00659	3.47322	-6.12436	-5.29376	0	0.0902538	-3.28727	-14.2351	6.81141	3.20027	3.31981	2.16312	-0.230238	0.0868131	2.20951	1.62809	-1.7107	-0.147956	-2.36898	-3.02138	-2.58476	-0.65037	-4.57568
2014-10-03	-7.29416	9.29815	-1.76996	1.51136	2.33474	-1.25745	-0.515465	-0.790518	2.67168	-13.1658	-6.25102	-6.49603	-2.6471	2.54458	2.44466	2.81709	-1.25666	-1.79778	-3.60295	-4.30932	-4.98506	0.409985	-2.56501
2014-10-10	2.65343	4.86892	4.87902	2.94022	-6.89929	-1.02495	2.55116	1.68638	0.894727	21.7138	-4.43049	-8.73726	-2.23384	1.2317	0.789729	-0.362977	0.313784	2.29012	2.62789	0.558884	2.7151	0.156316	-1.06303
2014-10-17	-0.754678	-3.59959	4.97615	-0.928336	0.820798	-2.40979	3.46569	3.28977	0.237248	4.24592	-3.64065	-0.747864	-2.7399	1.64505	-1.36552	-0.486028	-0.20908	0.944222	-0.404274	0.238569	-4.03438	0.395708	-4.20951
2014-10-24	-2.14197	-8.50799	1.60517	-0.538914	6.33457	2.40979	4.98324	3.28942	-1.37193	0.230681	-1.86511	-1.44816	-2.81709	-1.56153	-6.33782	2.64438	1.08543	-0.205356	-0.580385	-0.397931	4.03438	0	-4.49441
2014-10-31	-4.30221	-0.184923	7.66071	1.37324	-5.79109	-1.35997	5.62578	6.4669	-1.94063	3.39784	-0.914716	-2.04311	1.01825	0.16684	-9.59647	-1.91623	-0.00739454	-5.43024	-7.67981	-2.17663	0	-0.239636	5.00267
2014-11-07	-0.432294	-2.51153	-0.295421	-2.74948	-3.58659	-7.9931	0.65431	-0.293974	-1.85419	6.88444	-2.28596	-2.11263	-0.635192	0.245583	-5.27483	-0.363417	0.420618	-0.0368948	-1.51998	-2.39187	-2.7151	-1.84025	-2.27537
2014-11-14	-2.84487	4.10295	4.34222	-6.35293	-3.42891	2.70621	-2.86679	-0.590553	0.931395	10.6399	-3.62218	-2.97741	-3.98666	-0.295606	-0.102035	2.3982	-0.184264	0.640718	1.45711	-1.68354	-0.39396	-1.15523	0.999847
2014-11-21	0.354628	-1.36955	-1.13961	-1.45281	-2.35305	9.86238	-5.99258	0.982326	1.4115	-0.187091	0.800372	0.359796	-1.11137	0.116681	0.892107	0.708385	0.110599	2.73937	3.33983	4.31961	4.3765	-0.123686	6.49195
2014-11-28	0.936814	-1.4073	1.70459	2.17138	-9.35261	3.24871	9.07652	1.55192	-3.09431	5.99635	-14.8807	-8.14596	-10.8993	-0.0458228	-0.112486	-1.42182	-5.65431	-1.95626	-5.24465	-2.05346	1.87155	-0.633189	-2.12774
2014-12-05	1.29779	-3.38434	3.32441	0.730364	3.53167	-1.375	-5.34648	-1.06435	-2.93388	5.82356	-0.0758553	-8.42768	-3.29394	1.98843	-0.146421	-2.0495	1.5936	1.0972	4.0822	2.13473	-0.371517	-1.6577	3.17487
2014-12-12	-1.21334	-3.34919	2.68833	0.489576	4.62332	0.907408	0	1.16055	-0.714521	1.977	-13.0825	-11.4392	-4.15521	-3.28851	-0.316099	-1.84394	0.417393	2.30542	5.27384	0	1.47786	1.99342	-0.746829
2014-12-19	3.5056	0.313386	1.83974	0.403362	1.19762	-5.04207	-1.6148	-1.55042	-0.261097	4.15395	-1.56907	-0.103636	-3.16448	-2.68234	-3.79099	-2.00508	-1.38135	-2.06053	-6.57457	-2.80084	-2.85202	-2.76887	-6.66397
2014-12-26	0.139295	-3.53006	1.55042	1.77879	-2.10534	-0.954557	1.84337	1.55042	-1.64748	-3.50354	-4.16204	-4.28699	-2.07232	-2.20512	-5.50398	0.379028	-1.42821	-0.370487	0.435459	-1.17648	1.99259	-5.67081	-1.71331
2015-01-02	-1.28256	-3.10282	-5.26437	-2.67172	-0.916037	2.21288	3.36732	-4.72529	-3.3787	-5.15492	-3.48558	-5.1605	-3.33748	-3.44978	-2.92102	2.85911	-0.630817	-0.391209	-1.12361	0.841756	-2.49701	-3.46284	-3.34856
2015-01-09	0.581799	9.83	1.07528	0.101489	-1.23458	-1.09045	-4.74665	4.43641	4.30463	-3.11984	-8.65287	-11.0161	-3.33166	7.62556	-0.84681	-2.73309	-2.4746	2.48639	3.15133	2.64697	0.504415	2.15776	3.12007
2015-01-16	-0.217694	-3.8852	-2.16225	-1.17338	-6.41245	2.22826	-7.19735	-5.96006	2.47087	-5.98547	0.289137	3.38492	-2.63576	-3.82621	-2.12261	-4.64001	-6.6806	4.4782	7.72313	2.97569	-4.89789	1.76324	-3.45779
2015-01-23	-5.61545	-3.56876	0.54496	-2.82784	2.93659	0.414054	0.990107	-1.75534	-0.579712	0	-6.8934	-1.08392	-1.69124	-2.65883	-2.49197	-2.26828	-3.87077	1.38918	3.15903	0.946379	1.31235	-0.782836	-2.9525
2015-01-30	-2.10084	-0.361891	-5.01498	2.86205	-2.60601	-4.5863	1.70944	-1.25788	-2.81709	-5.37557	5.43928	6.67669	3.90263	-4.0548	-3.26414	0.940235	-0.144274	-1.49593	-6.24676	-4.24914	1.03762	-0.516235	5.52402
2015-02-06	3.49932	2.85233	4.47002	3.37932	1.6367	-2.42862	0	1.36199	-2.83038	5.00104	7.78674	5.43913	8.05099	-0.492495	-4.05432	-0.133779	2.30141	-3.162	-3.36613	1.46344	1.40938	-0.793112	0.460527
2015-02-13	4.54534	-0.55718	-0.547947	1.10153	-4.99272	0.366534	0	1.44631	1.96284	1.11941	1.91724	4.68351	6.82452	0.251286	-7.489	2.11928	1.47061	-0.0867749	4.17585	-3.11501	0	-0.219901	-3.94964
2015-02-20	0.689039	-6.4593	0.820798	2.94826	1.35595	-4.56352	0.241838	1.72856	-3.27005	-4.36088	-5.28336	2.06231	7.60881	-0.284522	-5.64867	-1.98551	-0.802657	-2.12043	-5.81076	-2.95755	-0.38241	-0.385994	-4.82611
2015-02-27	1.23459	-5.97528	0	0.364472	1.66949	-7.54846	-1.45988	2.88147	-3.66755	0.193611	-0.220463	9.74553	-6.93048	-1.36746	4.81592	-0.133779	3.71432	0.816264	1.57484	0.938974	3.14294	-0.470719	0.998226
2015-03-06	-2.53437	-0.774597	-0.546449	-3.24735	4.84748	-4	-5.54298	-4.9182	-1.15608	-6.5958	-0.462545	-7.33982	-10.1151	-0.0288892	7.1682	1.98814	-2.712	-3.43674	-4.80092	-0.938974	1.83941	-0.13887	1.93226
2015-03-13	-3.63953	-6.50571	-1.93644	-3.08636	-1.91089	-1.15282	-1.83012	-1.03414	-6.067	4.04914	-10.02	-7.91512	-12.0303	2.82966	-2.55852	0.392928	2.0005	-1.88066	-2.10266	-4.47247	-3.96582	-1.65339	-1.64887
2015-03-20	-1.0322	8.80413	2.755	2.98827	-2.60601	-0.274994	-4.5892	-0.208117	0.231392	5.96905	2.46491	2.92636	0.323939	0.163708	-4.32608	2.83524	3.20382	2.66703	7.9795	1.24779	-1.65714	-3.69853	0.775198
2015-03-27	-1.31532	-2.46185	1.88431	0.326584	1.6367	10.1043	-0.554018	-0.312989	-4.08862	-5.37557	5.97035	1.54803	3.30819	1.27242	-4.42301	1.88804	0.082291	1.33146	1.35815	0.794005	-3.93235	0.686685	-6.97704
2015-04-03	0.585147	0.690809	-1.3423	0.601383	-5.3346	-1.46822	0.82988	1.96592	3.85723	5.56232	0.612497	-1.47347	-3.11433	1.45674	-1.87573	0.249066	-1.2457	-0.281916	-2.19398	1.39618	0.400267	3.47699	-1.9765
2015-04-10	-0.128197	-1.13576	-2.7399	3.8934	2.36898	-8.81065	-4.50781	-3.65194	0.154321	-1.88329	4.96331	6.6493	7.46151	-0.0955479	0.86754	-2.64666	0.874853	0.83095	-1.32772	1.46239	3.40347	0.0702889	-3.11916
2015-04-17	1.92509	1.54488	1.10498	-3.40843	-3.74831	0.609614	1.43064	1.89479	2.8128	-6.27657	7.60568	5.72553	6.43887	-0.0956393	4.51449	2.02282	0.214433	-0.245488	-1.16103	-0.857638	0	0.909288	-0.555998
2015-04-24	1.8617	0.713878	-3.35227	2.4374	-2.46058	-0.95964	1.96912	0.104221	0.0749344	-1.63269	0.483482	4.67445	1.61608	-3.00642	3.43355	-1.0063	-0.628101	-2.17752	-3.50255	-2.88355	-0.386848	0.319778	4.9719
2015-05-01	0.225558	-2.96537	-1.43064	3.23633	-5.48584	4.61914	-0.558661	0	1.63451	-3.13505	5.42364	1.93979	2.40317	2.33438	4.47052	-0.761425	6.11804	-0.446538	1.95405	-0.0886918	-0.258732	0.221853	4.12009
2015-05-08	2.2801	-1.54032	1.43064	-3.59896	-4.22328	0.0117471	0.27972	1.03628	3.40489	1.47526	0.523164	-3.14107	-1.79694	-1.47411	10.8612	1.01395	-0.312427	1.02702	2.70953	1.1469	3.3124	-1.39472	3.92207
2015-05-15	5.68935	2.03547	0.848661	1.61382	8.63576	-5.84704	0	-2.29416	-4.07033	6.08707	0.537184	4.32065	3.19032	2.56902	6.44727	0.628538	0.363104	3.05691	6.46904	1.56661	-1.64249	-2.61825	-2.26318
2015-05-22	0.406751	-6.24344	-2.2793	-3.96311	-1.4493	5.16785	0	-3.10684	-4.01113	0.97944	-1.43329	0.561899	-2.58775	-0.0453823	2.63045	-0.250941	-4.11728	-1.30058	-2.30425	-1.3038	-2.05927	-0.810659	-9.52387
2015-05-29	-1.42694	-0.745491	-2.33247	0.917511	-1.47061	-1.91338	-2.25998	1.18985	-2.58129	-7.06651	2.30011	1.51298	-0.492747	1.06557	-1.2092	1.74351	-2.47931	-1.35468	-2.53776	-2.4802	1.80417	-0.758685	-0.710623
2015-06-05	0.526921	5.7504	2.33247	1.35277	5.05523	2.24839	-0.573067	0.536194	0.946379	8.42181	-1.91025	-2.3952	-4.83512	0.814067	0.327929	-0.619197	-1.31159	-1.73261	-4.14947	-2.08435	-4.1727	1.3384	4.30382
2015-06-12	1.44854	-0.613084	-2.03792	-2.49693	2.09067	3.10002	1.99153	0.639661	-2.46337	-3.72227	1.42776	5.28657	0.974499	0.851673	-0.681351	-1.25002	-0.583783	1.08936	-0.938974	0.274349	-1.61077	2.72271	-0.380229
2015-06-19	2.94845	-1.9924	0.293686	2.18027	-3.15263	-0.899634	2.50361	3.13833	-4.02188	-3.8662	-0.568658	-3.3099	-0.859358	-0.336254	-2.22204	-0.378072	-4.34417	1.50093	1.12572	-0.917438	-2.88284	-0.719783	-3.21297
2015-06-26	1.60974	3.06482	8.16205	-1.11626	3.49686	0.736665	2.174	2.64243	3.13299	12.4675	-0.352853	-2.15507	-0.115141	1.99208	-1.87746	-0.633314	1.80913	-2.46382	-1.88329	-1.019	-6.02765	0.691654	-2.06685
2015-07-03	-0.640131	-4.08022	8.54336	3.12575	-5.65522	-3.62749	1.60003	3.54717	7.50352	2.53178	-4.26401	0.463188	-1.80185	-2.35615	-1.88745	1.76327	-0.017408	-0.326747	-1.27553	0.742118	1.32258	-0.748327	-3.6814
2015-07-10	0.48698	-1.42575	1.47786	-2.8855	3.57181	1.2385	2.09432	-0.387973	-0.226159	-2.53178	-7.64483	1.24652	-5.1139	-1.51484	1.93832	-2.40062	-2.93255	-0.51452	-0.32144	-4.73125	-4.47836	-0.611275	-6.365
2015-07-17	1.37558	1.06296	-3.73642	0.175817	0.350263	1.01759	1.54245	-1.96277	-2.52211	-4.68689	-3.59043	-6.07908	-5.58521	0.715462	2.37433	-1.54642	-2.14273	-2.51853	-4.47738	-3.35007	-5.33042	-2.23497	2.10904
2015-07-24	-4.60949	-2.67888	-6.28479	0.175509	-6.87432	2.02027	-4.43358	-1.19643	-5.98026	-10.0892	-5.86857	-5.93397	-2.04425	-3.16113	-2.03167	-2.76515	-3.98418	-4.3703	-2.24729	-1.92216	-0.808412	0.0291588	-1.75443
2015-07-31	1.09624	1.48226	-4.42061	-3.66924	-0.751883	1.007	-1.3423	0	-1.32343	-2.58079	-1.8299	-3.66903	-3.73304	-0.0648088	-0.533538	1.58944	-0.477647	0.954924	2.04506	0	-0.978801	-1.09931	-2.32777
2015-08-07	-3.2403	2.1339	0.282088	1.62392	0.376648	6.55477	-1.91002	0.500251	-4.07873	2.36825	-7.12546	-4.41398	-3.4474	0.544935	0.723399	0.915638	-1.10732	0.232755	0.605451	-3.42891	-1.32015	-0.784202	-2.19789
2015-08-14	-1.84006	4.76204	-1.99153	3.43841	-3.05367	-0.56435	-1.38698	-4.69954	-0.173611	-2.15062	-3.29038	5.84112	0.571022	-0.19362	-0.799852	-0.39139	-0.130798	1.63043	2.18914	5.25082	3.42891	0.636709	-1.86921
2015-08-21	0.618826	-8.59904	0	0.907674	-2.35305	-3.33948	-0.84152	-4.16504	-2.10719	-3.09075	-4.82603	-10.5618	-5.56105	-0.675991	0.812497	-2.24729	-1.82962	3.79908	0.458266	3.06197	-2.10876	-2.08807	-3.84663
2015-08-28	0.390831	-1.29233	-0.57637	-5.17936	-2.00408	1.43273	-1.41846	-2.65209	3.48771	-6.00642	11.302	-2.03903	8.50657	-2.54072	-0.519745	-0.536194	1.63067	-1.96821	-5.712	-2.46197	-6.25732	2.22082	-1.38206
2015-09-04	1.89664	-2.5563	-2.04387	-1.07218	6.27657	-0.792062	0	-3.53313	2.11962	-3.14415	1.59898	0.360172	0.894399	-0.972067	-2.95372	-2.174	-0.296729	-1.28611	0.963531	-1.20363	0.348432	-0.561716	-1.09946
2015-09-11	2.83118	-2.17079	5.73223	0.891536	8.73282	-3.78393	-1.43887	0.23175	2.15776	4.3276	-2.79846	-4.97875	-3.27213	-1.27847	-4.42971	-0.275103	4.9145	-1.86115	-1.51832	-2.03881	2.06548	0.635392	3.45713
2015-09-18	1.75712	1.06895	-2.25362	-1.0409	0	-2.79055	1.15275	-1.39862	-6.18055	-0.471699	-0.0894254	-2.24416	-1.64114	-2.54703	-2.92975	-2.2285	-2.20871	3.27664	5.4799	1.73562	4.00721	0.161896	-6.25987
2015-09-25	-1.06393	4.18222	4.18471	-2.98379	-2.11275	-10.1672	-2.02612	1.5143	5.93394	4.84524	1.86134	1.51323	2.69711	-2.63926	1.2045	-1.13316	-4.46026	0.653124	-0.395779	-4.44978	9.51614	-1.24299	2.80273
2015-10-02	-5.1575	0.487243	0.54496	0.597119	-1.79538	-2.03772	-1.47278	-1.5143	9.41872	1.3423	-0.0219563	-1.95687	-0.210305	-3.6168	1.13512	-5.41464	1.36398	-0.503713	0.85555	-3.55449	3.22136	0.845138	0.800805
2015-10-09	-1.16629	4.32238	-0.54496	2.18717	-0.727276	8.81813	2.05587	1.39862	5.3239	-0.892863	8.68101	4.14062	3.78703	-1.93461	2.84958	4.55626	3.80971	1.64624	4.0455	6.98697	4.09373	-0.48842	4.57947
2015-10-16	2.1488	-2.63968	-1.93109	2.59542	5.67528	12.6601	2.58264	1.60738	-0.142146	-3.8862	-4.88908	-6.24461	-6.41782	1.99845	0.30722	0.573067	-0.127194	2.11391	1.31293	2.92212	-2.80523	-0.490817	0.85349
2015-10-23	0.462971	-4.96794	1.93109	-1.07598	-3.50913	1.0508	-0.568183	-0.342271	-0.213599	-0.467291	-7.43682	-2.42206	-1.74423	2.51582	-0.951431	2.81709	-2.29347	-1.63989	-1.56498	-0.0993542	-0.570615	-1.30564	-0.710735
2015-10-30	3.77704	3.62575	0.816331	0	0.711747	-0.074786	-2.30558	-0.573067	1.2748	8.31005	5.94585	6.42754	3.52935	0.243479	-2.92371	0.138793	-1.04241	-1.9097	-1.8466	-1.80547	-3.19795	-2.75668	-4.42356
2015-11-06	-1.0172	-1.90466	-0.816331	-1.02143	-0.711747	2.27864	-1.46846	-1.27243	-0.352485	0.215285	-5.01645	-0.687909	5.5742	-1.95936	-8.24718	-5.70768	-2.68711	-4.77916	-5.27827	-5.08672	-11.0791	-2.19789	-4.36839
2015-11-13	3.77685	-4.15621	-3.33364	0	1.76996	9.44292	-2.09275	-1.05326	3.67459	-5.98185	-8.54537	-10.2174	-15.1477	-4.44518	-12.0327	-2.37753	-3.35494	-0.497651	-3.51639	-8.09306	-11.1614	0.947874	-2.15175
2015-11-20	-0.0392352	5.65211	1.68071	1.64234	6.12436	-1.32788	-1.5221	0.469484	1.8213	0	-3.24704	2.65199	-1.80751	-2.54762	-5.26437	0.150263	-4.73364	-0.283105	-0.845671	-0.928081	1.64688	-0.820971	-7.66004
2015-11-27	-1.67653	-1.43529	0.82988	0.681821	0	-3.63668	-1.85764	2.08582	-2.43584	-4.67375	2.95169	2.23843	-4.2939	-2.61423	-0.41252	0.598804	-0.315338	-1.99978	-0.425533	-3.67994	0	1.7132	0.51414
2015-12-04	2.1784	1.37554	2.71756	0.645059	-2.67574	-2.19028	0	3.38251	3.03565	0.952388	-1.41494	-3.30448	-3.1108	-2.20822	0.876806	-3.49314	0.434689	2.50437	3.62915	3.79642	-1.64688	-0.0467617	2.30931
2015-12-11	-0.847156	-3.06916	-2.16811	0.256863	-0.680275	6.96673	0	-3.95755	-5.46211	1.41179	-11.513	-2.83707	-15.2871	-6.50771	0.833856	-2.98061	1.93305	-0.761558	-4.77284	-2.71403	0.184332	-0.73547	-3.22517
2015-12-18	-2.91435	-0.609354	0	-0.95047	-12.7213	-4.28815	-5.7894	1.94181	3.3808	-0.938974	-2.64333	0.646949	-5.10315	-2.09415	-1.83655	0.793026	-0.340934	-1.12091	1.63997	1.89579	1.82487	0.109881	0.801837
2015-12-25	-0.336104	1.0749	-3.06004	-0.486777	1.53849	2.2011	-2.34517	-2.05722	-0.135777	-1.66472	8.02199	-0.733004	3.1945	-2.2117	-2.40405	6.42423	0.117327	1.01682	1.82205	1.62984	-0.362319	0.656765	-1.43639
2016-01-01	-0.773162	2.7998	-1.13638	1.83728	2.26425	-1.61198	0	-0.347022	1.41655	0.716849	-1.31106	0.491862	0.303798	5.47147	-2.38773	1.61649	0.324598	-1.22275	-3.8943	0.230681	0.72333	-0.312208	2.06193
2016-01-08	-6.29632	-4.0964	-0.860837	-3.70895	-1.50379	-6.70677	-0.339559	-0.115942	-5.08351	0.947874	-11.1875	-12.5464	-0.812187	4.23142	0.995594	-2.35999	-4.86042	3.76852	1.36252	0.688866	-9.44097	-0.37594	-2.99217
2016-01-15	-3.31513	-2.56274	2.2793	0.61132	-3.46856	-5.65166	4.00053	1.83913	2.29895	2.79088	-11.9856	-7.8205	-10.7515	-2.7454	2.9831	-4.73733	-3.51909	-1.18816	-0.285307	-4.08697	-2.60797	-1.69348	-1.94639
2016-01-22	-1.21103	0.163815	2.2285	0.525712	1.55645	-5.2046	-0.65574	-0.456622	-2.36945	0.685717	8.52271	5.77788	9.10705	-2.82926	3.70413	2.93005	2.77455	0.937662	0.782644	-0.717706	3.00323	-1.49557	3.56867
2016-01-29	-4.07065	0.109061	1.0959	-1.15361	-1.94938	9.46708	0	0.228572	-7.99839	2.25235	4.83892	3.75834	2.55768	2.3405	5.16167	2.10534	2.67777	1.50889	1.26762	3.88513	-1.19049	-0.552398	-0.923794
2016-02-05	1.03216	4.16319	-2.20395	-2.07678	-1.18813	1.45145	0	-2.0762	0.381243	5.41844	-8.68493	-11.7176	-1.62936	-0.978475	6.04	-0.447428	1.37454	3.28866	3.16831	3.73981	1.58419	1.00503	-5.48409
2016-02-12	2.55426	-3.01619	-1.96912	-2.64076	-1.60646	-4.14837	0	0.812541	-0.228572	-1.70217	-5.1191	3.90405	-0.721281	-1.3049	2.50052	-3.65337	-2.76823	6.64153	6.81337	6.25204	3.28532	3.12798	-4.25596
2016-02-19	-0.381996	-0.459026	1.69018	1.27764	2.79459	0.613247	0	0.57637	-3.57181	1.49098	0.916659	14.6155	0	0.619902	1.00107	3.50379	2.57379	-0.141941	-2.11208	-1.68603	-3.67902	-2.18087	9.21664
2016-02-26	1.09131	-1.21621	-3.12082	-3.49137	-11.6799	-1.65833	0	-2.67925	9.71052	-3.22262	6.73017	-18.3246	2.85442	-0.252557	0.391626	2.80461	1.93817	-1.34501	-4.56579	-1.39114	-3.00323	-0.271978	-0.996199
2016-03-04	3.85403	3.62274	0	-2.24567	4.75251	-6.23996	-4.37044	1.52317	5.91889	1.51682	12.6278	1.33503	9.57669	0.403786	0.584578	-2.35652	6.60651	4.46302	6.29716	3.39016	11.144	0.256	9.54173
2016-03-11	2.09121	2.80486	2.2793	0.615832	2.50013	0.802345	5.02618	1.95746	2.3389	4.00475	6.99021	12.7664	6.53943	0.758981	-0.524464	3.80163	-1.00268	-1.00976	-0.50988	1.4478	4.61894	0.446429	-5.61512
2016-03-18	1.84784	5.6516	0.561799	2.51417	1.22701	5.03379	-2.9853	0.681821	5.33717	-2.72268	2.46229	2.27454	2.19975	1.37154	0.329984	0.143369	1.74937	-0.376618	1.45895	-0.20555	2.90867	-0.702429	-1.94403
2016-03-25	-4.60663	-2.58222	0.836825	-1.24027	-1.22701	5.85504	1.00503	1.34985	-0.125313	0	-3.42773	8.78791	0.083647	-0.129522	-1.34169	-3.64738	-1.94007	-2.66779	-3.85157	-1.55524	-2.73521	1.6524	-0.11554
2016-04-01	-2.50274	-0.549589	-4.54624	0.975791	-0.826451	8.2027	-0.33389	0.334635	-4.22598	2.72268	-7.56824	0.0605602	-11.1324	-2.35423	-0.532604	-1.19583	-2.38403	-0.671621	-2.38422	0	-3.16928	-0.252446	-3.88971
2016-04-08	-0.427918	-3.18995	2.29895	0.73879	0	-6.12483	0.998344	-0.670394	-2.65092	-3.57556	11.6777	7.4778	5.72103	0.227215	1.54432	0.150263	-4.11672	2.37913	2.90641	0	-4.01514	-2.07509	2.66841
2016-04-15	2.51235	1.55678	4.44518	2.59485	2.86318	-0.360493	7.03165	3.84874	2.19205	0.213904	1.64715	0.119311	3.80998	-1.02019	0.225107	-1.36057	3.46642	-0.94601	5.93984	2.9853	5.61233	0.16116	4.23889
2016-04-22	5.58562	-0.0679232	-3.03472	4.80092	3.17487	-7.01435	11.3659	3.49797	1.75843	1.48465	5.67733	5.35318	6.17734	-3.83014	0.96965	-6.93191	4.35666	0.947621	4.61574	4.17141	7.29755	-0.306427	1.94397
2016-04-29	2.6244	-0.451161	4.91902	0.422284	1.16506	-0.193881	1.36801	3.78175	5.46447	2.90477	7.26034	4.37722	5.89318	-4.61136	3.57259	0.974034	0.410597	4.00617	4.74782	3.53596	2.74432	0.0807298	3.83106
2016-05-06	-4.48381	2.09379	-4.0822	-1.48586	-4.33993	8.99034	0	0	-1.35387	-8.08951	-3.09212	-5.95871	-4.15125	0.124662	5.27319	4.4241	-4.82423	-0.151778	-1.74702	0.655126	-3.8966	-0.193861	-4.10647
2016-05-13	-3.13443	3.28734	4.0822	-2.76869	-0.404041	3.43911	7.58533	3.1592	5.42629	1.32161	3.61273	5.08305	4.452	1.19029	3.28819	0.769827	-4.00624	-1.51406	-2.70832	-2.83841	-2.00676	-0.161839	-4.80183
2016-05-20	-1.16448	-3.24557	0.796817	0.522899	-1.63269	2.91296	0	1.35137	2.03318	1.52012	3.08897	3.77332	6.60857	1.5743	3.08155	-0.924506	-1.02988	-1.45109	-3.6887	-1.64493	-4.31473	-1.20582	-1.63364
2016-05-27	2.37828	-1.75236	4.39916	5.2277	3.23915	-2.1938	0	0.859194	1.87986	2.97262	3.48381	1.18606	-0.0702988	-1.65641	0.216519	-0.62112	2.83616	-3.30959	-1.3423	-4.0822	-3.77403	0.80007	-0.945634
2016-06-03	1.23071	3.40885	1.25788	-2.48962	0	8.03045	0	4.82468	5.75659	4.49974	-1.36667	-3.34193	-0.847463	0.763727	-2.47308	1.8519	-0.509718	2.28252	0.612372	-0.509425	1.45457	0.113775	0.886793
2016-06-10	1.66562	4.74045	0.995033	3.77464	3.52287	5.63392	0	3.99521	5.03872	-3.04592	0.818168	-3.1767	1.89679	1.1482	3.93812	0.457667	-4.36294	2.68251	5.34887	1.72156	0	-0.750044	4.93786
2016-06-17	-1.89987	1.54692	3.40666	-2.58676	0	-0.238601	10.0563	-1.22593	0.757006	-2.08341	-2.24543	-6.06858	-4.48314	-3.34594	3.00115	-4.83336	1.00692	1.05131	0.461895	-2.85152	-4.24027	0.310483	1.55645
2016-06-24	-2.07189	-2.61013	-13.012	2.53946	0.766287	1.45206	-3.71272	-4.59747	-3.6349	-3.42646	-2.74568	0.0484882	0.508168	-1.92098	2.20212	-1.28619	3.21752	2.06318	2.61527	1.9438	3.15133	-0.179636	-0.497651
2016-07-01	-0.701713	5.16139	-8.2316	-0.791644	2.26425	4.73439	4.84524	5.73634	6.41148	-7.46109	4.84842	0.641979	3.90536	1.782	1.0537	1.92314	4.37006	1.6673	9.21422	5.1344	8.73155	0	10.0136
2016-07-08	2.96676	-0.610931	-0.891536	1.04365	-3.41589	4.81362	-8.94714	-7.59859	-4.80814	1.86052	-7.73773	-9.01628	-9.79599	-0.620795	-2.38362	-1.27797	-4.20495	1.46529	2.02641	4.05525	1.32892	0.0326851	-0.906807
2016-07-15	-0.293584	2.19986	0.298063	12.1882	4.8974	-2.06164	0	-0.0940292	-1.03147	-1.86052	1.22674	4.3397	-1.08109	0.523397	-2.33065	-1.45752	4.22536	-2.09603	0.998012	0.91997	6.23703	0.991797	3.96877
2016-07-22	-4.51583	-3.1195	-4.567	-1.02177	0.366973	-1.43794	-2.24169	-6.61076	1.23649	0.234467	-5.64287	-4.12908	-4.52638	-3.14636	-3.94084	-3.82424	0.214035	-0.518073	-2.2597	0	5.87076	-2.57286	1.25666
2016-07-29	-1.87999	1.9283	0.311042	0.365118	-3.73178	-3.14988	-3.06929	2.08859	-2.12168	-8.29744	-4.4033	-0.625638	-4.4858	2.32164	-4.46444	5.12085	0.086503	2.12608	3.19867	4.56455	3.30727	2.68604	2.09133
2016-08-05	4.52349	-0.676338	-2.83484	4.05192	-5.06931	4.93312	-1.30721	-2.39055	6.28373	1.26424	0.695697	2.72253	2.01857	2.45403	-4.75756	2.85734	-2.8059	-0.713388	-2.84379	0.262123	-1.13799	0.258231	0.796444
2016-08-12	-0.599626	-2.7443	-1.61034	-6.43501	-6.61398	-0.655263	-1.32452	0.703167	-2.43611	0.250941	6.1201	-0.0662471	7.76701	1.30623	-4.03761	-0.943403	-0.634956	1.03457	2.00408	0	-0.717878	0.321854	-3.90154
2016-08-19	2.78223	0.355872	2.8802	-4.05768	0.42644	-1.34985	-0.267023	2.08031	0.451921	1.24535	8.63365	9.7176	10.6592	0.0810756	-1.74535	-3.04755	0.770868	-0.593588	-3.94588	-3.55277	2.42005	1.43566	0.484028
2016-08-26	-2.39808	1.59354	-5.17915	-0.961401	1.6878	2.97908	-2.9853	-3.5932	3.78517	-8.79119	-1.74786	-5.155	-1.18427	-2.57907	-0.613637	-2.30653	-3.88259	-0.847181	-3.46491	-2.65705	-2.99808	0.0791578	-5.40672
2016-09-02	-3.4313	3.73715	0.331675	0.541925	-3.40458	0.372816	-4.79641	-5.85942	-1.6047	4.23344	-7.06585	-2.98466	-7.56725	-1.1851	-2.61612	-4.77907	0.281996	-1.17018	2.79186	-2.34863	-2.94139	-0.301133	2.51649
2016-09-09	-4.57396	0.365417	4.53152	2.16819	-1.30721	5.30215	1.43474	6.46732	-0.392928	1.03094	3.30151	3.1393	1.05264	-3.06906	-1.27173	0.870328	-0.0433323	1.16043	0.827734	1.97653	1.18696	-0.924899	3.03499
2016-09-16	1.45139	-1.08553	-0.953902	-1.34588	-2.21739	-0.735311	-2.30558	-3.07717	7.71615	-0.25674	-6.38994	8.43504	-1.05264	-3.04689	-2.96212	2.05839	3.34572	-1.7179	-3.24636	-5.85299	-3.29865	0.112081	-6.42171
2016-09-23	0.970279	2.10887	-0.963089	4.45553	1.77782	2.07978	-0.878483	-2.425	1.5371	0.512822	3.02082	-8.87148	1.12741	2.21183	-5.40047	-3.1037	1.28067	2.14952	5.23571	4.16122	6.06246	0.0479962	9.17985
2016-09-30	-2.75316	0.144311	-0.323102	-5.20281	5.98469	1.98903	-2.9853	-1.5054	1.20403	-0.770222	7.30124	5.51694	8.72605	-2.35357	-5.17131	-2.66209	0.309886	-1.36782	-2.35064	-2.0106	3.52397	0.367207	-0.800569
2016-10-07	-0.799508	-1.051	0.966191	-0.240313	8.73571	-3.65923	0.904984	0.21645	0.265604	-5.8372	4.18609	-1.65593	3.36732	-5.36733	-5.45339	1.60574	-1.86863	-5.29471	-11.5523	-5.87526	-6.8795	0.0796495	-3.6105
2016-10-14	-2.94317	3.45887	6.21318	2.34815	2.99648	-4.33035	0.29985	0.539085	-1.6942	10.1254	1.17872	4.51863	-1.33335	-4.04282	-1.31068	-5.4559	-2.18843	0.00718044	0.981816	-4.40323	-4.86418	0.0954958	2.75579
2016-10-21	-0.553645	1.3424	0	0.673403	5.3873	5.7499	-0.29985	2.23295	-0.857987	-1.24225	0.515057	2.09926	0.401876	-2.02161	-0.864144	4.74542	-0.884627	1.00021	0.229621	-0.645164	-3.6483	-1.91449	-5.13686
2016-10-28	0.558839	4.08914	0.899556	-0.409357	7.08559	7.04452	2.66682	2.08124	-2.10824	-1.00503	-3.80596	-3.26734	-1.88939	4.25213	-1.22249	2.63868	4.60076	0.31387	1.31019	4.74022	-0.485831	1.91449	4.61092
2016-11-04	-4.01809	2.24788	-1.20122	-1.35695	-3.31156	2.20742	-1.76996	-2.18645	-2.01176	2.9853	-10.031	-1.6479	-8.30559	1.42558	-1.49491	-2.81709	2.97708	2.62579	4.15687	3.1395	1.45047	-0.606353	0.287219
2016-11-11	-2.66549	-5.58288	-1.5221	0.592243	0.336135	-3.56733	0	1.87701	-0.663824	-0.491401	-1.55503	-6.52773	-2.85305	-0.857693	-4.04422	2.46926	10.7202	-5.95045	-3.93076	-2.93395	9.16672	1.31968	6.92478
2016-11-18	-2.6187	0.495051	0.916037	5.59767	3.94788	-0.456047	-0.597017	-0.310399	-7.04551	1.22401	5.16505	-0.786617	5.12171	1.45687	-1.53881	2.57968	-2.35112	-1.7217	-6.47268	-5.37821	4.70507	-2.09089	-3.31021
2016-11-25	-0.352438	-4.48166	1.80728	-1.4057	-5.98185	1.58178	0.597017	4.06147	-1.75082	-1.47061	2.22929	5.99783	3.90259	1.6604	0.709963	3.01026	8.02985	-1.92309	-0.483093	-1.85899	1.52042	0.289902	6.38467
2016-12-02	-0.855239	-4.13721	-3.9579	-0.967291	-5.99827	2.30051	0.888895	-0.298954	-3.11289	-4.80497	10.1285	8.23804	8.02033	1.45058	5.07105	-3.01026	-1.8327	-0.807792	1.32293	1.31581	1.90223	0.385233	-0.912455
2016-12-09	-9.5194	-3.12858	5.43941	0.740533	6.34015	-3.62598	0	0.993057	0.481156	3.3124	-0.368182	-2.98945	-3.13137	-0.926252	9.35826	0.338983	1.10537	-1.03513	1.3646	0.759635	0.134499	0.160077	0.130862
2016-12-16	3.24634	2.26511	-0.886269	0.453002	2.36099	-8.70791	0	0.197433	-3.91567	-0.502514	0.812069	4.03625	3.64386	1.26095	4.45614	4.46724	-3.35788	-2.73197	-4.5202	-2.29644	-7.82522	0.159821	-2.65033
2016-12-23	-1.21855	-2.08785	-2.70693	-2.63324	-2.36099	-0.208303	-7.34275	-4.53936	-0.388997	-4.3765	0.153935	3.12402	0.446287	0.545291	0.154919	2.24009	-3.13949	0.171298	-2.81356	0.220995	-4.91536	-1.25343	-7.04647
2016-12-30	-4.68329	0.80525	2.70693	0.419652	3.02544	0.984692	6.75103	0.822204	6.67632	4.62808	3.29077	2.77411	2.5127	0.579886	-1.15908	0.788026	1.22511	2.09437	1.75994	-0.886924	2.26425	0	-3.81838
2017-01-06	5.02475	2.92057	1.76475	5.10911	3.25762	-6.10237	-1.19404	-0.925456	5.86619	4.42333	0.426994	-2.46999	-0.435189	-0.0450653	2.38987	-2.54386	0.83392	1.44609	2.64387	6.5721	10.6107	-0.194238	2.22067
2017-01-13	-2.11978	3.39139	-0.291971	-2.72618	-0.321028	-0.496964	0	5.03631	-0.245882	0.956945	-3.04707	-1.52391	-2.71567	-0.814668	8.52826	2.70072	5.49339	1.7264	1.68476	1.24354	0.134138	3.58062	1.98122
2017-01-20	-2.04562	2.4299	2.59755	0.408078	5.32207	-9.57098	0	1.94559	-0.989617	-0.477328	-0.0573121	-2.94482	-1.35355	1.07726	4.46959	0.936044	-2.64788	0.606626	1.48063	-0.827306	1.99078	0.685468	-7.44761
2017-01-27	-1.60412	-0.154094	-1.72418	1.87805	-2.46926	2.98367	10.2654	-1.8474	0.74313	-0.720291	1.61126	-3.16905	-1.43793	-1.70789	2.08172	-0.936044	2.64363	-1.11511	0.352113	0.207469	-5.26082	-0.404481	-2.34691
2017-02-03	-1.0959	-2.7142	0.865806	2.07318	1.55042	-3.84002	0	-2.28298	2.96642	3.55067	1.17769	0.295194	3.42965	-3.22996	3.6018	-1.10324	-2.05635	2.42916	2.54496	2.7595	3.404	-0.82962	7.6179
2017-02-10	-5.75409	-0.788174	2.27283	-1.19502	0	1.84784	-2.46926	3.065	-2.62151	4.32377	0.0557362	1.27342	0.190658	1.0805	4.35751	-1.11555	5.38275	1.08931	2.64879	0.100756	4.451	3.17143	4.16627
2017-02-17	2.38017	0.896154	-1.98588	-0.355824	-8.00427	3.07432	0.554018	-2.56424	-0.641502	-1.7978	-0.801869	-3.55479	-1.14944	-0.562282	3.91636	0.160128	-2.28653	0.516002	0.443952	1.69749	1.52481	0.379969	3.5932
2017-02-24	-0.78431	-2.10121	-1.15275	-0.756902	4.24207	-3.97855	-2.8013	-1.91635	-2.35423	-2.29368	1.08008	1.29614	2.16019	-0.494604	-0.455167	0.159872	-0.505903	1.41678	1.75636	1.66916	-0.886643	-0.227808	-1.73441
2017-03-03	-2.15187	-0.360679	3.13863	1.54893	4.3757	1.4676	-1.43064	1.21459	-1.73829	1.38251	-1.22998	-6.38614	-2.86918	-0.15753	-5.07995	0.636945	-0.156504	-2.44738	-3.76985	-3.97272	-3.89154	3.68671	1.18995
2017-03-10	-1.42112	-1.38107	-3.42891	1.57887	-5.01673	1.18674	-2.03792	-2.65051	-6.16889	-2.31492	-10.4257	0.4611	-5.72345	0.181138	-1.07543	0.947874	-3.26135	-2.03612	-4.44774	-4.66648	-0.530505	-0.646871	-10.4956
2017-03-17	4.42789	0.402925	-1.75958	0.534118	-2.27652	2.78535	-1.48151	-0.414079	-0.439803	-0.941183	0.601724	0.164654	0.273598	2.03286	-0.737395	2.63786	3.44321	2.39385	2.45053	1.8928	3.39902	1.66744	3.62233
2017-03-24	5.35466	-2.31263	-2.09275	-1.1519	-7.15808	-1.02462	1.77519	-2.52114	-2.28486	-1.90937	-2.17491	3.56868	-0.205128	2.58015	-1.93168	3.1653	-2.38605	1.55049	2.16656	0.415801	4.76878	-2.31852	-3.8753
2017-03-31	-2.11584	1.78252	2.38817	-1.30171	-2.14294	-11.9638	-8.56793	-3.24353	-4.73256	0.720291	6.62548	5.67651	4.28733	0.180167	-3.84579	-3.1653	0.672822	-0.107379	2.61635	-2.52114	-2.23058	0.636332	1.55821
2017-04-07	-4.23618	0.641745	-0.888895	-1.94315	4.24092	4.56594	0	-0.550966	-0.711747	-0.479617	3.32748	2.99816	3.09902	-0.0150015	-3.72283	0.914641	-0.297036	1.46842	0.984152	2.83186	0.997515	0.338709	1.5343
2017-04-14	-4.82641	-0.38754	3.50913	1.9295	2.39328	-2.81721	0.636945	1.75251	-1.1374	1.43201	1.78305	0.0363835	0.633716	1.86532	-3.96262	3.43061	-2.42185	1.55924	0.488468	0.823898	0.123993	-1.33197	-4.31577
2017-04-21	-2.37917	-6.89289	-3.50913	4.19679	-1.36057	-2.17402	0	-0.217391	-0.543316	-5.85533	-6.90734	-3.13459	-6.3907	2.60888	-3.41275	1.88822	-1.17293	0.0233329	-3.35842	0.409417	-0.496895	2.35582	-4.24258
2017-04-28	-0.554786	-1.03736	0.593474	-1.83613	0.341881	3.82952	0	-0.436206	-2.20327	7.0332	-0.667006	-7.41224	-3.4947	1.6434	-1.01355	3.39495	2.0612	-1.41206	-3.76542	-3.42891	2.58158	-1.22988	1.11733
2017-05-05	1.81083	2.23812	2.04985	0.796711	2.0271	-8.19949	0	2.26914	-2.88783	-1.89131	-6.4498	-2.21391	-3.33246	4.38994	7.88087	4.22118	-2.61691	-3.21798	-5.37443	-3.98975	-1.83716	-1.21537	-3.33544
2017-05-12	6.61113	-0.126552	0	0.540791	-6.20889	0.365152	0	-0.858374	1.39155	-0.95924	3.40241	5.11555	3.68053	-3.50479	10.4681	-0.400802	-0.436869	0.161146	0.67258	1.42001	-0.123686	-1.23032	1.89656
2017-05-19	1.01808	-0.770671	1.15275	0.707828	-1.79538	-5.5958	0	-0.431966	4.66342	1.90937	5.07496	5.29575	5.47619	-0.0699643	5.34525	-0.9415	2.25822	1.91536	2.05074	2.25211	-4.81715	-0.0453001	0.481929
2017-05-26	-5.92648	-0.0877718	0.855925	-2.80813	9.00262	-0.761137	0	-2.8542	-7.53077	0.706717	-1.48151	0.068253	-1.72532	0.7044	0.735201	0.135044	-0.482163	1.11465	3.173	1.89081	1.29034	0.0151023	-3.03711
2017-06-02	4.58531	-2.12997	-0.569802	0.736134	4.21456	-3.74377	-3.55449	-0.222966	-8.77756	3.00601	-3.90755	-3.43251	-6.07083	5.68688	1.8789	4.22784	0.0354673	0.845319	1.26438	-3.06416	7.05302	-0.9102	-1.83389
2017-06-09	1.41805	0.154818	3.92207	-1.61316	-3.22609	4.46939	2.27652	2.2076	2.98945	3.79934	-3.97913	-6.47012	-4.73332	1.20082	3.39486	-1.69606	2.44331	-0.940826	-1.72815	0.748266	6.81163	-0.918561	0.726463
2017-06-16	0.919376	0.260205	-0.827591	-6.55238	5.11293	-0.109144	-2.60601	-0.328048	-5.70778	5.33745	-2.40763	-3.90345	-0.448431	-2.60916	5.70343	-5.12933	-2.46104	-0.850158	-3.18799	-1.71862	-3.05973	-1.84716	-0.446429
2017-06-23	-6.91808	-1.86891	-8.07355	-5.16665	-1.25393	-4.43588	-2.67574	-3.90893	-3.31767	-1.67719	-4.27054	-0.392423	-3.73947	-2.93244	6.0266	-2.80917	2.47834	0.0621029	0.119904	0.432433	1.93738	-0.0783638	1.55386
2017-06-30	2.63999	2.42768	5.26437	1.52721	2.79956	0.226729	3.00523	4.45508	4.75757	11.3782	7.11371	6.49718	7.34412	1.94207	1.19565	0.851069	2.5028	-1.03208	-0.360144	-0.540834	-5.21253	1.92553	3.35711
2017-07-07	-2.91408	0.796304	2.53178	0.553686	2.12451	0.920183	5.75238	5.40672	4.33634	1.68386	-3.92207	-0.0268007	-1.67581	0.85711	0.814469	-0.141343	-2.09708	-2.70459	-7.74903	-1.20023	-0.835826	0.888078	-5.13493
2017-07-14	2.39264	2.39068	-4.83736	-2.29444	0.896867	-4.73477	2.15062	-1.56009	1.2921	-4.94397	5.02419	4.78867	4.03222	-0.917653	0.0432526	2.23786	1.72945	1.42581	3.1972	0.765449	3.0699	0.304414	7.08596
2017-07-21	2.50058	2.12066	2.02027	1.84574	5.78196	2.53636	0	2.5868	1.00841	-2.36697	-1.625	0.223321	-0.424329	2.17653	-1.49216	-0.138408	1.10726	1.93526	3.3419	2.04859	-0.934586	-1.80959	-0.576069
2017-07-28	3.76095	0.420313	-1.72915	1.118	-1.12996	4.79805	0	-0.614756	-0.267917	-3.45212	8.256	5.52942	8.42317	-0.972584	-3.38145	-4.82363	5.29207	1.28282	1.51015	-1.07297	2.66374	0.709332	6.89929
2017-08-04	-2.73413	1.45358	-1.75958	1.83599	-2.00868	-0.803619	0	-4.73523	-1.48651	-5.74015	-0.302145	-0.229427	0.195249	-0.426411	-2.29631	1.72915	0.826533	-0.797448	-2.4273	4.12103	1.02332	3.41371	0.488999
2017-08-11	-1.94528	-0.127853	-1.19049	-2.60981	-5.6647	-1.14463	0	-1.52012	-5.74388	-3.33735	-1.54506	-1.37547	-0.652318	-2.61793	-1.54497	-6.33963	0.553779	2.32847	4.67992	1.84621	1.5713	1.89753	3.92207
2017-08-18	-4.20651	-5.90549	-2.11808	-2.38862	-2.4846	1.29146	-4.34851	-0.438597	0.93291	-6.54439	-0.451746	0.872515	-0.78844	-1.66561	-2.90812	-1.22513	1.07907	0.651912	-0.0586338	0.101574	3.71627	3.67631	2.9577
2017-08-25	2.19877	0.0638468	-3.4218	4.34135	-1.90482	-0.698712	0	0.875279	3.85337	-0.484262	-1.95351	3.48043	-0.462811	-0.17438	-7.02948	1.68071	2.99624	-0.220957	0.117233	-1.02042	-0.214823	0.853092	4.49664
2017-09-01	1.15608	-1.59231	0.315956	2.60281	-4.9271	0.772045	0	0.217628	-2.15361	1.68476	-0.694959	19.6218	11.7415	-0.111763	-7.29462	-2.14403	2.31929	2.21211	3.68069	2.43173	1.7058	1.67096	4.67772
2017-09-08	-1.30344	-0.764915	0.314961	3.94622	-1.01524	11.4652	0.632914	0.865806	1.87832	0.476191	0.253272	-1.4082	-1.00682	3.54287	-4.94069	2.29543	-1.9627	1.80454	1.95701	1.49034	-0.423729	-4.33816	-3.76764
2017-09-15	3.18741	5.18119	-2.22585	-7.16623	1.35137	-2.80379	0	1.49735	3.18779	4.8677	5.05552	-10.4226	1.35976	1.24025	-7.83755	-0.759305	-3.2173	-1.78865	-2.12655	-3.81956	-1.92932	0.399658	-4.40989
2017-09-22	-1.18172	-2.02138	1.91089	-1.41025	3.94788	-1.6601	-0.632914	1.37061	-3.46384	-0.909097	0.858032	-5.32233	0.410197	1.6585	-8.53914	4.17971	-0.70282	-1.98929	-4.0987	-4.29161	-0.869571	1.13316	-6.23168
2017-09-29	2.17325	-3.85656	0.628933	0.818883	0	1.35655	0	-2.97578	-3.6598	-4.67375	2.6276	-6.53402	5.01816	1.10786	-6.02236	-2.36697	0.256849	-0.945795	-1.2452	-1.61729	2.05302	0	0.764822
2017-10-06	2.43355	0.623208	-1.57981	-0.848788	-0.972455	5.5385	0	0	1.21127	-0.961546	-4.61422	-0.269229	-7.38513	0.678188	3.84837	1.92741	2.82421	-0.95168	0.357356	-0.983077	0.851975	2.72315	0.947874
2017-10-13	0.356349	-1.65675	0.634923	-1.09767	4.77038	-3.43733	-0.317965	2.76613	2.72458	3.32572	4.14865	3.56299	0.298954	0.199351	6.55129	0.293255	3.59951	2.17024	2.98704	3.24002	5.4681	-0.178339	9.65958
2017-10-20	1.21295	-0.441465	-1.59493	-1.37009	2.45411	2.37969	0	-1.69316	-2.72458	-3.32572	0.388124	3.10852	3.05726	-0.625103	7.95829	-0.440206	0.907085	-1.32689	-1.92258	-2.3657	-2.02847	-0.0412003	0.512603
2017-10-27	-1.20963	0.541149	1.27797	2.07819	-2.14403	-0.873636	0	-0.427808	3.82124	1.91393	4.33986	4.77333	3.19115	0.155029	5.74905	3.04151	-1.76364	-0.999174	-1.66077	-0.217865	-0.410678	0.575265	-1.32964
2017-11-03	-2.12728	-2.39477	0	0.718029	0.617286	1.67577	0	0.214133	-1.23458	2.57324	3.12212	2.62109	0.447678	2.88197	-0.20284	5.41423	0.936706	-0.148966	0.65574	0.543775	2.33869	1.05965	9.42891
2017-11-10	6.9514	1.0069	-1.60003	0.60926	1.52675	3.03254	0	0.106895	3.25894	2.05722	1.9933	1.10112	2.42704	-0.0501819	-2.8689	-4.98718	-1.62653	0.670566	0.237389	1.61381	0.501254	-0.081114	-4.9537
2017-11-17	-2.93876	-2.00687	2.23295	0.16283	-2.45411	2.22406	1.57981	0.32	2.37635	-0.909097	-0.956098	-6.11117	0.163354	-1.56189	-3.29242	-1.43064	-0.151883	0.886891	1.64613	0	-0.300451	-0.189522	-4.5184
2017-11-24	-1.35417	-0.430404	0.628933	1.97707	-3.47586	-0.574414	5.48918	2.00323	0.260586	-2.30957	4.74253	1.95634	1.02843	-1.05713	-2.75232	0.143989	3.44698	0.0877149	-0.819677	-0.213675	0.400401	-1.36428	3.89715
2017-12-01	-3.54021	1.18345	2.47691	2.42115	-0.969313	-0.82682	0.296297	0	-2.77063	2.30957	-1.00606	-2.69783	-0.377664	0.91682	1.33871	-2.03495	-2.48771	-0.456492	-3.59105	-0.107009	1.48738	2.12022	-6.39017
2017-12-08	-6.83908	-3.17872	-1.8519	2.17019	-6.02189	-5.92214	2.33929	-0.418411	-6.42264	-3.24855	-2.078	-1.29386	-0.868627	-1.5241	1.93669	-2.82968	-4.07317	-2.75796	-4.04158	-4.60103	-0.691361	-3.83819	-3.05779
2017-12-15	-0.664245	-0.910584	-1.56989	1.27986	4.05461	-5.8787	-0.579712	-2.22585	-3.18868	-0.236128	0.24467	-3.60546	-0.766287	-1.10772	-3.10114	0.301659	4.75382	0.529818	1.63629	-1.12741	1.86554	-0.195832	5.594
2017-12-22	-2.25914	0.0621476	1.88093	3.41431	-2.68473	-6.13614	-1.75958	-2.05746	7.10526	1.40847	1.6618	5.89234	3.45607	-2.15917	-2.50013	0.45079	3.30016	1.55006	2.4053	3.34479	0	1.96873	4.64023
2017-12-29	2.3097	2.8092	0.310078	0.907722	-0.340716	0.696409	-2.39532	0.545555	3.30553	0.696867	3.72379	2.09371	5.62439	4.36247	0.985071	2.07723	1.70729	2.26331	3.59105	1.63136	2.6873	-0.827135	5.06336
2018-01-05	-0.168647	1.6518	0.617286	0.457308	1.01868	0.874874	0	1.29732	-0.066379	0.921666	1.68926	-0.6802	0.899107	-1.35512	5.35004	-2.37753	-1.79908	1.21245	1.40107	4.12103	3.62662	0	-1.85886
2018-01-12	1.7521	-3.19979	-1.23841	4.14944	1.67508	-1.02122	0	-0.971405	-5.03851	-2.55531	4.34401	3.71163	1.13722	-5.39229	8.04527	-1.97425	-0.060059	0.87988	-0.990396	2.55507	0.273598	-1.42202	1.58419
2018-01-19	1.13382	-0.0350631	2.76515	0.424311	4.54624	6.99029	4.44518	2.25211	-6.41662	0.469484	-1.31663	1.47932	-1.73572	1.1657	3.11336	2.87246	-1.06584	0.1824	-0.528325	1.99807	1.26699	1.64326	-0.0393005
2018-01-26	2.7252	2.55348	1.20483	-3.02153	-1.27797	2.23065	5.08584	0.73957	0.963327	4.57746	4.4589	4.37608	3.19988	-0.0338926	0.584122	0.742394	0.616022	1.42517	2.32704	0.591718	-2.27386	0.523489	7.0564
2018-02-02	3.74732	-2.65874	1.78046	-4.28778	1.91089	-1.17487	2.71756	-0.633582	1.3187	1.55386	-1.16872	-3.51235	-5.06815	0.419458	0.876548	2.48369	-0.55175	-1.64063	-4.16849	-1.98616	-3.74927	2.7644	-1.58763
2018-02-09	-0.862561	1.2299	-0.589972	-0.537347	0.941922	-0.067588	4.96834	0.317293	-0.730463	0.658619	-10.1129	-9.3902	-9.5667	-0.331361	0.321716	-1.45351	-4.2586	-1.30947	-2.61175	-2.84862	-7.74196	-4.35712	-3.52242
2018-02-16	4.21101	-2.09372	2.33929	-1.80773	-1.8928	1.27643	6.66091	3.93425	-2.14903	1.7354	4.44371	1.91083	2.87471	0.351613	-3.58325	2.31559	6.89705	3.21591	2.91106	3.64782	6.78226	3.0522	7.06877
2018-02-23	2.58166	0.221073	-0.289436	3.79486	-3.56602	-3.11758	0	1.41131	1.63451	-0.647251	2.59962	3.42458	2.47591	0.101198	-3.91819	-2.46211	-1.80665	-2.07191	-1.14218	-1.50379	0.384986	0.256948	-1.11975
2018-03-02	4.93108	0.87068	3.69886	3.69428	5.14583	-4.64797	2.12523	2.76424	0.661038	7.70412	-3.7371	-4.80756	-4.01355	-1.94736	-2.3795	-1.47713	-2.85462	-0.627539	-0.667276	-2.24729	-4.72064	0.215866	-2.315
2018-03-09	5.85079	-0.429995	1.38698	4.3699	-2.86188	1.19898	-1.41179	-3.87145	-4.10966	-2.22907	1.34731	-0.761454	-0.666299	-1.45442	-0.949985	0	1.0724	0.135507	1.39017	-1.98233	-0.910477	-0.229373	3.00279
2018-03-16	3.10193	-1.70292	-3.07717	-2.01803	-4.62128	-1.34337	-2.3982	1.10721	-1.53731	-4.18471	0.434399	3.42038	3.50337	-1.12956	-3.1513	-1.80185	-1.06147	-0.559108	-2.30733	0.105319	0.304414	-0.541787	-1.71007
2018-03-23	3.72176	-0.952731	-2.88204	-1.99617	-5.91477	-1.74787	0	-2.22681	-0.699575	-1.50703	5.48189	5.26126	6.40677	-3.62814	-5.73305	-4.652	-3.65714	2.55812	1.88627	0.420169	-0.101368	-1.29863	-5.08106
2018-03-30	-3.62882	1.16719	2.88204	-0.814876	-2.54097	3.92564	-28.4451	1.42279	-2.04893	-1.97159	-1.42346	1.34028	-0.607289	-1.19233	-7.84683	-0.956945	0.925027	-1.88031	-1.64088	-1.90482	-1.63603	-0.66262	2.66682
2018-04-06	-3.13433	0.932884	1.12996	0.827556	7.43705	-2.21454	0	0.100857	-0.799365	4.96326	-4.47671	-4.37741	-2.83159	0.258809	-4.87725	-2.92704	0.749514	0.674747	0.488999	-2.70726	-6.4951	-0.444198	-0.225819
2018-04-13	3.48445	-0.576473	-1.69976	1.18479	1.69209	1.89654	0	1.89721	-1.78142	1.46293	8.22848	7.36149	7.58967	1.5971	-0.91121	0.821697	0.990693	0.98211	1.57293	1.95658	8.13113	3.63378	4.92566
2018-04-20	4.77264	-0.588762	-0.860837	-1.00744	0.668899	1.37279	32.2551	-1.79646	-2.9853	-4.02171	1.3421	3.45558	0.963399	0.391702	7.81297	-1.81673	2.24778	-0.518607	3.18987	0.429646	4.46281	4.99777	6.18898
2018-04-27	2.49048	2.5528	4.50781	1.93037	-3.04592	7.27826	-32.2551	1.59844	-3.16401	5.66783	-0.21999	0.684703	0.906711	0.85064	7.19831	2.95588	-2.80476	-1.2093	-4.27619	-2.38623	-4.76754	-2.0109	-6.5843
2018-05-04	-0.269206	0.686631	3.78424	-0.5103	5.35245	5.09943	0	-1.29678	4.75068	6.32622	2.32197	-0.621824	1.18065	-0.872361	1.73723	1.12632	0.461298	-0.879477	-0.121433	-1.10376	-2.05557	0.0520698	1.00323
2018-05-11	0.870741	-3.6249	-2.41622	0.199452	1.93554	4.53433	0	-2.95488	-2.093	-5.51321	1.39603	3.21642	3.18807	-1.44412	2.12608	-0.320513	1.73016	0.801563	1.80619	2.7369	4.16939	0.298876	0.213675
2018-05-18	-4.41868	0.313859	1.61729	0.892642	-0.641028	-1.94096	0	-0.414508	2.83589	3.96877	0.760996	1.97044	1.93656	-1.84621	5.57998	-3.92849	-1.21236	-2.26309	-1.98862	-4.64172	-2.31748	-4.96079	4.82649
2018-05-25	-3.08457	1.28988	0.533335	2.34214	0.960007	1.78747	0	4.26894	6.21714	7.67448	-4.75835	-3.21901	-3.17199	1.04962	1.59632	2.47333	0.584348	0.914614	0.727717	2.67873	-0.306279	3.5364	0.203183
2018-06-01	-3.80525	1.10751	-3.51863	6.36414	0.317965	-2.00007	0	-1.90865	0.231571	-3.4834	-3.15587	-1.25956	-1.29752	3.05562	2.3055	2.09516	0.254583	-0.423519	-0.484556	-0.552183	1.32049	-2.64051	4.40104
2018-06-08	-3.44558	-3.36906	-5.08584	1.02426	-1.92314	-3.06188	0	-5.52512	-2.49818	-0.937214	-0.0607995	-1.5727	-0.702086	0.986286	6.41604	1.26785	6.21383	-0.0354386	1.8051	-0.22173	2.39294	-0.270636	-0.161996
2018-06-15	3.91059	-1.13653	-3.84094	0.313059	-2.95588	0.527005	0	-6.9912	-1.35299	-3.05951	-1.16227	-4.53989	-3.68375	0.475364	8.91861	-0.790518	-4.25359	-1.29593	-1.07915	-0.333519	-1.99012	-3.58659	-1.53573
2018-06-22	0.23331	0.328647	0	-9.28127	3.92207	1.19931	0	-0.692044	0	-0.779731	5.98552	2.60448	1.93056	0.705321	3.95177	1.26185	-3.29489	-0.90646	-1.09092	-3.51311	-3.99848	-1.61408	0.525453
2018-06-29	-0.14202	-0.952388	-1.82376	-0.898191	0.32	-2.00729	0	-4.25596	-1.04713	1.16733	7.1424	5.11789	3.56845	0.273732	-3.81911	-0.471328	-2.48215	-1.45917	-1.59709	-1.86268	-0.314301	-1.59704	-2.42014
2018-07-06	-1.66883	-0.683227	0.306279	-1.83354	0.31898	5.08312	0	1.79538	-2.95831	2.86006	-0.473262	-2.17312	-1.20651	2.63546	-1.27359	2.64196	-5.37193	0.296093	-0.933133	-1.5394	-0.631581	0.923927	-6.62402
2018-07-13	1.52782	-1.52162	-5.33879	7.01168	-4.22827	0.0176876	19.3017	-7.25579	-4.34666	-3.63676	-3.79854	-0.261072	-2.07555	1.2146	-1.94755	-2.64196	-0.988384	-1.01321	-0.878851	-0.838831	-0.317293	2.5677	0.2149
2018-07-20	-6.97362	1.21542	4.41712	-1.31122	-1.33781	1.46445	2.36542	4.00053	1.38411	2.12158	-1.01883	-1.37456	-1.44026	0.148268	-4.37618	2.79521	-1.52768	-1.05612	-2.29602	-0.845926	-5.666	-2.2091	-3.23606
2018-07-27	-3.12774	-0.512416	2.13749	1.45195	0.671143	-3.70639	0	2.66037	-0.689658	2.26425	-2.37472	5.04832	2.90704	0.477007	-6.34814	-0.460477	2.44834	-0.416604	0.257732	0.604963	4.17185	2.16707	2.40976
2018-08-03	-7.1237	-1.26899	0.602411	-0.52876	3.93493	2.86835	0	2.12523	-0.956113	4.55867	-0.247904	-2.53776	-1.27631	0.361277	-8.87638	1.22326	-1.54189	-0.360116	-0.128783	0.361229	-1.08109	-2.74145	-2.26204
2018-08-10	0.0240134	-0.46461	-3.35909	-1.67512	2.22585	-3.87349	-1.30721	-4.90823	-1.67331	-3.07717	-1.29318	-1.17957	0.616554	0.917377	-12.5002	-2.15062	-0.29177	-0.381169	-1.23178	-0.481929	-0.983077	-2.22798	1.97303
2018-08-17	1.71398	-4.20226	3.35909	-6.3429	-2.22585	-3.74134	0	3.02138	-3.80136	2.00189	-2.51623	-2.83425	-2.10232	-0.970817	-12.3483	0.155159	-4.49463	-2.99335	-4.33257	-6.10021	-1.77192	-4.13375	-2.49097
2018-08-24	8.59274	-0.109089	-6.83496	-0.511903	1.91089	-0.573978	0	-5.75787	0.184332	-6.70642	5.57502	4.97127	4.71563	0.791991	-7.49596	-2.19445	3.37233	2.37415	1.3532	0.894575	4.05091	3.26116	-0.483362
2018-08-31	-1.18525	-2.15644	0.641028	0.983091	-2.8802	-1.28629	0	-1.52481	2.81453	-2.73455	0.186313	-3.47291	2.00645	-0.578401	-5.04236	1.88389	-2.04825	-0.38584	-2.31146	0.76046	4.91988	-5.37042	-4.69283
2018-09-07	-2.98859	0.172213	3.45403	-1.33011	-0.325204	1.5015	0	1.27228	3.51839	-5.91406	-3.06777	1.35526	-0.998193	1.75803	3.37548	0.620157	-0.892037	-0.36814	-2.2254	-2.04089	0.305967	-2.12268	-3.53843
2018-09-14	-1.69255	-1.0173	-6.70107	0.308523	-1.31149	-2.09886	-0.263505	-3.47302	1.88362	0	1.82874	-1.52228	-0.502858	0.483629	12.916	3.19419	0.602576	-0.141954	-0.49348	3.66898	0.507873	-0.0961076	2.39916
2018-09-21	-1.62687	0.469245	2.28395	-4.08701	5.14583	-3.89267	1.83012	1.68726	-3.01357	1.04494	2.60424	2.21713	0.685091	2.54906	12.9104	0.448096	6.95725	0.111075	1.33382	2.93779	5.71021	-3.58929	4.59452
2018-09-28	-4.55391	2.58189	-0.972455	-0.913371	3.39016	0.325204	1.03094	-0.386848	-4.19517	-1.46599	3.27898	3.68673	5.87755	-0.286415	10.0154	0.742394	-1.83506	-0.549061	2.34332	-1.7032	4.58238	-6.98238	-5.03007
2018-10-05	0.035176	4.96257	5.38958	-2.34823	6.73754	-3.08409	2.78147	3.30399	14.9582	5.53988	1.49236	0.554607	1.61774	0.799903	3.07446	-0.296297	-1.55266	0.876557	-0.47798	1.09824	-3.06288	2.21957	0.158604
2018-10-12	5.10065	6.21113	0.615387	3.22148	-0.283688	-0.0696817	-15.332	-1.25788	3.39539	-0.801607	-3.91345	-6.9612	-2.60977	-1.20227	-0.88336	-1.94763	2.43485	1.39622	-0.0684697	1.68476	2.1446	-0.0348493	0.276954
2018-10-19	0.122932	2.82448	0.306279	-0.603745	0.848661	-1.05109	0	-0.126662	5.96423	-0.605451	-3.20153	-1.65408	-0.652318	-0.571192	-3.4328	0.452831	-1.45057	0.624849	0.205269	-0.358638	0.184332	-5.03948	-1.63318
2018-10-26	3.59525	-0.458023	1.81823	0.96425	-1.13316	-2.85562	0	-1.5326	-0.573478	0.202225	-2.31106	-4.61086	-0.218388	-1.1718	-3.47688	1.19762	-0.337757	1.2381	0.816887	-1.20483	0.642499	2.06791	-4.51822
2018-11-02	0.960067	0.389021	1.49034	-0.039992	-1.43474	0.0572071	0	5.01987	-2.76986	1.00503	-6.82744	-7.51971	-6.03787	-0.00651232	-0.124766	-0.896867	1.78833	-0.845081	0.405955	4.85015	1.90309	-3.06258	0.251784
2018-11-09	-1.34364	-4.10377	0.295421	-0.937716	1.71924	-1.28935	0	0.61013	-5.00104	-1.20726	-4.75315	-4.94681	-0.46555	-1.94653	-3.50969	-2.278	-3.8803	-1.68959	-4.5588	-0.928081	0.715567	0.921326	-3.93213
2018-11-16	-1.55783	-1.62222	-1.48591	-2.39728	0	0.686397	0	1.68882	-0.311284	7.03415	-6.34426	-1.80391	-3.75609	-2.35163	-5.58377	1.22139	2.35745	0.838945	1.47319	-1.88241	4.87053	1.63729	-0.963652
2018-11-23	-4.54266	-2.95789	-0.902262	2.08725	0	3.1192	0	-1.08239	-1.96779	-1.52094	-3.75157	-4.6003	-5.11913	1.86569	-1.84568	1.35646	0.208668	0.188205	-0.418703	-0.476191	-3.1913	-0.724378	-3.99604
2018-11-30	2.78073	-1.76592	3.26924	-0.0405104	-0.284495	1.22804	0	2.62545	2.89875	2.27283	-6.90454	-4.06499	-7.62678	-1.30299	-1.89812	0	-0.152445	-0.333283	-0.842702	-4.01758	5.45745	0.32662	2.57758
2018-12-07	1.1178	-2.57109	2.88204	2.16441	0	-0.70024	0	2.90212	0.154321	0.746272	3.82508	2.77977	2.82167	-2.68583	-0.426743	0.597017	-1.26052	2.1632	2.85038	-2.0076	0.248653	3.48914	-2.6234
2018-12-14	0.489419	-2.66922	-0.569802	-0.902821	0.851069	-2.99322	0	-3.13797	-1.71077	3.11096	-2.88426	-3.59697	-1.94496	1.51622	-1.77982	1.18345	-0.346183	-0.572348	0.205409	-0.63573	2.04841	-1.12598	1.54619
2018-12-21	1.88209	-0.485683	-0.286123	-5.97664	-4.6251	-7.16058	0	-0.948999	-2.54184	-1.63491	-12.1839	-9.73135	-6.77077	0.6341	-3.33825	0	-2.64996	1.69937	0.341414	0.762393	0.727276	0.40611	-1.86751
2018-12-28	5.04797	1.27994	-0.863315	-4.34033	-0.593474	-1.88296	0	-1.80402	0.241061	-0.550966	-0.50812	0.56458	-4.17224	0.0883182	-0.394626	1.6047	0.326237	1.38724	4.40071	-0.253486	2.22939	-1.3304	-1.3423
2019-01-04	-1.34406	0.569176	3.1297	-1.83546	0	-2.23427	0	4.50847	-3.42891	1.09891	5.61982	2.89687	6.48048	-1.13366	2.58355	-2.04686	-1.51043	0.424918	2.76634	1.51136	-0.0787712	0.178412	3.4802
2019-01-11	-0.249516	1.79598	-1.41046	2.99681	0	-1.61691	0	-0.581735	6.82174	0.363637	7.42276	3.13935	5.3857	-0.65461	4.8528	2.04686	0.385031	0.569705	-0.700417	2.71287	4.46916	0.355872	3.10171
2019-01-18	-1.92436	0.0879808	0.848661	1.76739	0	-1.04299	0	-0.116754	2.07301	-0.545952	4.1133	1.45549	1.76806	-1.81379	1.49205	1.15109	1.83276	-0.524507	-1.48055	-2.58794	3.5533	0.743235	3.09303
2019-01-25	-2.88146	1.07878	-0.282088	0.344037	0	0.0656891	0	1.27686	-4.42791	0.545952	-0.130682	-3.66164	-1.49816	1.12703	0.257976	-0.57389	0.132593	1.16494	1.79953	1.36394	-3.25232	2.16262	1.21927
2019-02-01	-1.59634	-1.06901	-0.282886	-1.1659	2.06193	1.77183	0	-0.694447	0.791143	0.542988	3.23498	2.92629	1.39189	-1.86186	-1.40104	0.287357	1.28774	1.47909	1.57981	1.5883	2.74193	1.13228	5.64617
2019-02-08	1.73707	0	-0.568183	-1.59069	-0.584797	-1.026	0	-0.34904	0.393237	-0.542988	-4.70283	1.96914	-0.26617	0.509303	-2.23699	0.999295	1.21888	-0.279614	-1.0082	-3.20224	1.88275	1.65796	-0.713439
2019-02-15	4.45878	-2.20288	0	-2.68352	-1.17995	-5.0775	0	-0.584455	2.71019	-3.1339	5.22597	8.77035	5.74841	-0.296778	-2.52539	-0.855925	0.0363379	0.0791007	-0.826714	-1.38629	3.03803	-1.55566	-1.36165
2019-02-22	-0.782722	-0.963476	0.284495	1.72276	-0.59524	5.61199	0	0.933496	2.26596	-3.2353	2.54033	2.59314	0.301508	-0.631813	-2.9853	1.56364	5.13014	1.11818	1.83491	5.19276	3.08349	0.476029	4.64834
2019-03-01	-2.91861	0.452785	-3.17487	1.3425	-3.9579	-4.77886	0	-0.933496	-3.57317	-7.42568	-2.21699	6.04557	-1.56767	-0.592838	-2.28451	1.12203	0.0919963	-2.00632	-4.02997	3.8989	4.6796	-1.02285	1.56581
2019-03-08	-1.06596	-1.18153	-1.77519	-0.528946	1.23458	0.503483	0	-1.53577	-3.86636	-2.96005	0.0179324	-2.31807	0.609758	-0.222326	0.0962371	-0.981087	-1.57557	-0.415846	0.260756	-5.35524	-2.87414	-1.31082	-0.798939
2019-03-15	0.293081	-0.77504	2.06802	1.28807	5.37443	8.20244	0	0.47506	2.46337	5.02198	4.79616	5.46584	-1.4286	-1.28624	8.40893	0.84152	0.35357	0.290736	-0.260756	1.57675	3.00284	0.6058	-1.22984
2019-03-22	-2.36256	-1.49557	2.88204	4.10314	2.01446	2.54795	0	0.708385	0.391697	0.610378	0.613394	3.74776	-0.360361	3.07937	9.87772	2.21003	-2.05724	0.807764	0.65062	2.61298	-0.0643294	0.120721	0.501448
2019-03-29	4.41532	0.559587	-6.15128	0.764795	-6.16936	-7.17476	0	-2.86416	-0.627453	-1.01938	2.21746	-3.87878	0.5657	0.436282	13.9044	-4.18471	2.68745	-1.29434	-1.63456	-0.35232	-11.1529	-1.38843	-0.0846838
2019-04-05	4.90465	-1.16413	2.38817	0.827705	5.88405	-0.745598	0	2.62859	1.79342	2.42927	4.72145	8.4646	3.4773	0.61599	9.26193	0.709726	-1.57325	-0.264295	-0.197955	6.04862	-2.77188	-3.55783	0.667821
2019-04-12	0.877725	-2.32692	0.294551	-0.192519	-2.89875	-9.88141	0	-0.236128	0.231571	-0.400802	1.19724	2.69878	1.1817	-0.216564	1.12481	0.704725	1.21803	-0.00154764	-0.79576	-0.443952	0.956945	-2.64236	-0.37558
2019-04-19	-1.88884	-0.171361	-0.589972	0.219992	3.46856	1.23315	0	-1.78896	0.231036	-4.09893	0.250235	2.19385	0.244439	2.06264	2.44566	1.25612	-0.0425557	-1.32188	-0.0666001	-1.00616	2.174	0.0371816	-2.72454
2019-04-26	-1.57019	0.811363	-1.49034	-0.78594	2.52468	-6.17947	0	-2.93061	-2.88744	-1.9008	-1.14682	-0.74842	-1.57484	-0.535789	2.32738	-5.56095	-0.964275	0.95286	0.398937	-0.112423	2.54791	1.10907	-1.97647
2019-05-03	1.52186	-2.85811	3.24992	-3.27852	-3.95532	-9.02995	0	-2.63669	-0.396669	-1.28757	-2.09156	-5.24446	1.526	-5.50741	-0.76979	-1.32843	-2.68467	-0.504564	-0.866383	-3.89958	-5.16244	-1.40691	-1.99169
2019-05-10	-2.79328	0.567316	-4.7628	-5.01571	-1.4514	2.38174	0	-3.75935	-2.41363	-1.96299	-0.533852	-1.74051	-0.784702	-1.48097	0.265284	-1.95055	-1.96566	0.485145	-0.873955	0.233645	-3.51964	0.890874	-2.14116
2019-05-17	0.456405	-2.28883	9.03088	-8.19245	3.44862	3.37584	0	1.57277	-1.14661	8.84787	1.8004	2.23156	1.80537	-2.67221	1.84936	0.302572	-1.2355	-0.840174	-2.53005	-4.04817	0.304414	5.53501	0.768785
2019-05-24	3.90712	4.84509	6.20982	2.56238	0.282088	3.85049	0	1.16356	1.06515	5.10917	-7.21614	-5.45359	-5.51693	3.52535	-1.52475	-0.758154	-1.6883	0.56791	0.964859	-2.83445	0.982995	-8.00427	2.80714
2019-05-31	-1.4168	9.0672	5.59943	1.67249	2.2285	6.63983	0	6.34936	2.81256	3.0191	-8.78212	-8.22762	-7.86385	-2.59659	-2.46686	-2.15393	-2.14696	1.26478	0.0685636	-1.13138	3.0384	-0.76046	-2.77385
2019-06-07	2.22159	-2.48088	-2.25291	-5.4502	-3.64697	-2.1797	0	-2.56581	2.73561	-0.746272	0.856297	-2.93793	-0.721224	-0.595532	-1.64985	-0.624027	-0.487753	3.45769	3.0377	1.63013	-1.02716	-4.84849	-3.38528
2019-06-14	1.21684	-4.22834	10.7889	2.0282	1.41846	-2.41636	-1.75958	6.0042	1.37828	7.22336	-2.78161	1.42686	0	0.970626	-0.854169	0.3125	0.345558	0.321213	-0.734071	0.248447	6.49533	4.12065	2.10391
2019-06-21	0.826409	1.60283	-1.37302	-4.53795	-6.09768	-2.86291	-3.30857	0.928081	-3.40327	-2.64799	8.89313	8.18002	4.88962	-1.56973	-0.785212	-2.04893	2.7181	3.15591	2.57866	-0.372903	3.59727	-8.50211	1.88701
2019-06-28	-2.14982	7.02492	-4.23593	1.71346	-1.81274	0.723027	-0.613499	0	4.31168	-1.07915	1.47125	3.5336	0.528822	1.48732	-1.78313	2.51586	0.410403	1.34225	0	1.85076	1.58733	1.78391	4.84356
2019-07-05	0.817467	0.672319	4.92479	0.81281	2.11169	-1.3384	-2.8083	-2.6918	-1.90192	-7.50822	-1.9782	0.339293	-1.80952	0.694525	-7.1622	1.38784	-1.54565	-1.23753	-2.04425	0.852105	3.22817	-1.32452	-1.66869
2019-07-12	1.99193	-2.6199	4.47502	-6.62471	-2.11169	2.29382	2.50013	5.31303	-0.153728	1.73917	5.00745	2.14973	4.56652	4.43256	-1.66846	1.21767	0.651496	0.931892	1.06031	-0.852105	-1.27879	2.87494	7.63376
2019-07-19	-1.64374	0.618121	-4.70411	0.176367	0	1.48458	-1.86921	-1.47311	-5.37254	-4.50615	-7.92373	-6.80025	-4.29836	-1.65103	3.52814	-0.91186	2.11123	1.50426	6.13611	4.30689	-1.29535	4.35712	8.94212
2019-07-26	-1.93085	-4.71162	-5.17763	3.44653	-4.36206	-1.34097	-0.947874	-1.95972	3.27375	-3.67388	1.11252	1.85516	0.374232	2.38873	9.23653	1.21398	-1.90482	-0.690815	1.721	1.27983	-0.195759	1.53849	-4.37114
2019-08-02	-3.04207	-1.92598	-3.9414	-8.85912	0	-2.60001	-2.89875	-3.67558	0.0785238	2.86905	-0.662432	-4.52169	-1.99414	0.0847697	5.23629	-1.67304	-4.07536	1.8462	-0.611249	-2.81378	-9.73371	-1.53849	2.45196
2019-08-09	-4.80754	-0.154456	2.23612	1.10989	0	2.36277	1.94181	2.5046	-0.788026	0.804833	-2.28934	-6.07333	-3.71543	0.0282406	-3.52136	-0.461185	0.494066	3.83508	4.2023	2.5823	3.0488	-2.98999	7.33662
2019-08-16	-1.42248	-2.11411	-10.073	1.8951	3.44322	-3.83794	-2.59755	-1.42351	-1.99767	-6.20033	0.768953	-1.18664	0.0564812	-2.90789	-3.99304	-8.1842	-0.218312	0.354121	0.644596	-3.5381	1.79936	-4.49238	4.09506
2019-08-23	1.01831	1.06785	-3.03472	-3.54588	-3.12525	-2.70963	-0.660068	-2.54097	-1.46344	1.69137	-1.37731	0.732824	0.169253	0.0435951	-5.29362	0.33389	-1.87961	1.73314	1.79455	2.13785	0.13708	-4.00565	-3.39016
2019-08-30	-0.942989	-0.083342	-0.843887	2.52991	1.57484	5.39685	-0.664454	1.45988	-2.40376	-5.16244	1.81407	-1.65951	1.51052	0.644439	-7.01921	0.166528	0.758739	-0.316635	5.36142	9.84034	5.46438	-0.304812	13.3691
2019-09-06	2.30874	-0.627289	-3.15665	-0.585225	-0.626961	-1.06316	-0.668899	-0.970881	-1.94839	3.47106	2.47502	4.03107	4.29297	-0.564564	-8.56379	-3.72925	2.67787	-0.558014	2.04528	0.848361	-0.0648719	-0.656314	-1.20839
2019-09-13	2.54705	3.78685	3.72003	6.04951	4.60911	1.00562	1.99342	3.71078	-0.600602	3.56059	-3.03953	-1.47784	-0.908369	-1.22692	-8.62844	3.56272	2.38137	-1.81811	-6.15241	0.945882	3.75721	4.38026	0.366869
2019-09-20	5.53345	-1.73156	0.839166	0.0517822	-1.81823	-0.988515	-3.00523	-1.42014	1.36754	0.819677	5.61027	5.90777	6.34308	2.60377	-5.89908	0.498754	-3.05931	0.686004	0.846267	-1.6878	2.83445	3.30609	-1.67594
2019-09-27	0.526972	2.16483	0.278164	0.653597	-2.16392	-0.068417	0	0.475625	4.23827	-3.74264	-3.46043	-1.95354	-2.91357	2.00581	0.380194	4.53887	-0.586639	-0.786496	-1.92859	-1.60861	1.44755	-3.72714	-1.44261
2019-10-04	0.573638	-0.767061	3.54744	0.819537	5.17619	0.389351	3.33364	4.18179	4.76659	0.843887	-5.719	-4.71039	-2.52114	1.33828	6.77633	0.158353	-2.26115	1.04088	0.228833	-5.78582	-0.54038	-3.43381	3.34365
2019-10-11	1.44564	-4.02101	3.42589	3.68898	1.17995	-2.05948	2.58914	1.91555	-2.91245	3.50913	3.56915	5.0178	2.93522	-0.110842	4.76477	0.788026	2.73508	-1.69655	0.0571265	1.70362	2.32084	1.73165	-1.35826
2019-10-18	-0.258889	0.609886	-1.56661	2.07597	2.31894	1.23115	-1.28619	-0.111669	-0.801929	4.75337	-1.86163	-0.450053	0.669243	1.16461	5.3601	1.09291	0.368022	0.521527	0.285144	-0.225479	3.63887	7.44145	-7.81926
2019-10-25	-0.795889	3.33003	-0.527706	-0.418209	0.855925	-0.935813	-0.324149	-0.785198	0.160901	-0.776703	5.02509	1.43985	1.3252	-1.10917	-2.17517	2.45411	2.09129	1.29038	2.47482	4.95423	0.847223	8.5483	3.30283
2019-11-01	0.24909	4.09274	0.527706	-1.08582	-1.43064	-1.88771	1.61034	1.11983	1.27797	-0.390625	-0.852884	-1.82314	-2.56424	1.44432	-5.18516	3.13225	-1.36358	0.132428	0.44346	0.428725	1.28529	-0.293041	0
2019-11-08	0.582198	4.36135	-3.20883	0.455211	2.2793	2.12508	2.52379	-0.894861	0.554018	5.51995	1.73364	-0.828782	-0.677615	0.0477865	-2.39373	0	1.42704	-2.99903	-6.74927	-5.15748	-1.84931	-2.41333	-3.54959
2019-11-15	4.98512	-1.06793	-1.36801	0.129681	2.50361	0.913028	1.8519	-1.58554	1.41068	1.28797	0.907827	-0.882342	1.19575	0.115958	-0.337041	0	-1.45279	0.0122725	0.472256	-0.564654	-2.46219	-1.34306	-7.80116
2019-11-22	-1.9008	3.08801	-0.552488	-2.79256	0	-1.24933	-1.54086	-0.228572	0.543269	2.3488	0.243013	1.04403	-0.518136	-0.93145	-1.80553	-0.736923	0.210062	-0.0443246	0.411402	2.01801	2.29236	2.42698	-2.29662
2019-11-29	-1.37818	2.04273	-0.834497	1.02752	-0.275103	0.493657	-2.83484	-1.26657	0.463321	1.41846	0.759935	-1.13153	0.103842	-0.151494	0.719304	2.04985	0.09417	-0.31356	-0.176108	-0.779948	3.72576	-2.0658	-6.82123
2019-12-06	1.09536	2.5528	2.21003	1.39175	-2.2285	-3.40416	4.3757	1.15209	1.90773	2.77796	1.84117	-1.55261	0.259135	-1.12964	-0.822486	-1.45988	2.01188	-0.136251	-2.5589	0.446429	2.15991	6.92711	-1.43675
2019-12-13	-1.40939	3.50492	0.816331	1.40472	-0.564973	1.71744	-0.921666	2.2651	2.46373	2.20161	1.52547	0.861616	1.2857	0.784481	2.8663	1.89372	2.3825	0.865009	2.14677	3.82351	5.15337	-1.01433	5.02909
2019-12-20	-5.90883	-2.26547	2.67396	1.79555	-1.42656	4.1663	2.13749	2.54298	0.514896	1.49629	0.530945	2.57555	1.97325	0.942916	-1.24497	-1.16112	0.673321	0.350553	1.28958	0.321028	-2.1021	-2.99559	2.47442
2019-12-27	3.0509	2.10534	0	1.01842	-4.406	-3.51822	-0.910477	0.435731	0.0733407	2.44511	2.17702	2.18644	1.59049	-4.7989	-1.53534	1.16112	0.664777	2.36388	4.44264	1.06271	-1.51399	-2.72761	-2.19254
2020-01-03	1.11332	-3.1444	0.78844	0.915516	4.406	-0.774681	1.21214	0.217155	-1.77519	0.321544	1.98788	0.391434	0.540941	5.17496	1.73829	-0.869571	-1.36676	2.31833	0.887416	3.83666	3.92005	1.18612	-3.25435
2020-01-10	3.11681	-3.84168	0	3.20721	1.14287	-1.30878	2.38106	0.540834	4.87902	1.43429	-6.52584	-5.35341	-6.22198	-0.0477832	-0.338467	1.01377	1.11191	0.73812	0.165517	-1.43445	6.51074	2.75052	3.11351
2020-01-17	7.27319	-4.41024	0.522194	-0.0897935	1.12996	-0.638443	-0.589972	-1.8509	2.31833	1.41401	-0.799528	-0.720915	-4.42857	-0.492814	1.93072	-0.868312	1.20779	-0.168766	-0.497376	4.7364	15.5504	4.7645	-1.99295
2020-01-24	-2.17188	-1.15037	0	-2.80896	3.04311	1.47103	0	-3.01194	-0.557105	0.466927	-7.92318	-7.85612	-7.00456	-2.60676	2.8845	-2.35305	-5.72314	0.904023	0.0553863	-0.295712	-0.406505	-0.487296	-7.15122
2020-01-31	1.50033	-3.38422	-2.10534	-2.96943	-3.04311	0.201335	0	-3.3394	0.557105	-4.12103	-4.75153	-1.62332	-6.90347	-0.007043	-0.794749	-3.02138	-6.08868	0.981673	-0.22173	-5.47804	-6.73939	-4.13164	-0.775198
2020-02-07	2.40712	-3.26744	1.05821	0.443179	-0.281294	-1.16236	0	1.39537	2.2658	0.966191	-2.4334	1.89879	1.06019	-1.11195	-4.92299	-0.153492	1.73226	-1.21872	-1.79176	1.24354	0.130634	-1.8164	-0.624514
2020-02-14	-0.462132	6.16281	-1.32452	-0.538402	-2.5679	3.152	0	1.71727	-0.271924	-2.76216	3.30205	3.87137	3.4749	0.142339	-4.35269	0.612559	1.79845	0.894879	0.33841	0.102934	6.73088	1.4521	1.90039
2020-02-21	-0.512468	1.67703	-0.267023	1.10533	0.863315	-0.641996	0	-0.113572	3.47861	0.656817	2.52409	3.90479	-1.14494	0.291162	-0.107258	-2.78656	-0.0826321	3.77406	4.19025	0.410678	9.01932	-0.292398	-3.79768
2020-02-28	-5.77388	0.480747	-2.43584	-12.5488	-5.90142	-4.98029	0	-0.569802	-7.50693	-8.89475	-17.4184	-14.9083	-12.9212	-5.46504	0.606279	-8.51578	-2.26617	-3.44959	-9.80678	-11.3821	1.0723	-0.734757	-2.21918
2020-03-06	-3.07719	-0.944829	2.70287	2.53134	3.58247	1.65302	0	0.342271	-7.50352	-1.26014	-8.58967	-5.29762	-5.5294	1.02084	1.48229	-0.171086	-0.504184	4.99566	2.17976	2.71817	-5.59692	1.06364	4.66313
2020-03-13	-6.67672	-0.370917	-3.25232	-4.07424	4.02353	2.18056	0	-4.9018	-11.0552	-2.38325	-26.0033	-39.8499	-17.912	-7.87894	3.78117	-12.3794	-2.55977	-8.57374	-14.9306	-13.4969	-38.8114	-1.35907	-4.13413
2020-03-20	-7.69805	5.85655	-9.83451	-13.139	-4.02353	5.74949	0	1.66077	-7.2534	5.59208	-48.7559	-42.8221	-14.6191	-7.07878	4.75927	0.386848	-12.5494	-2.94307	-16.4351	-24.186	-6.45385	-15.1873	-9.30805
2020-03-27	0.468744	-1.79532	0	-4.96668	-2.97641	10.8053	0	2.32569	2.08814	5.46211	-22.9839	-9.74984	4.63365	13.2228	5.29323	-0.580834	-0.474565	9.00038	13.761	18.9354	32.062	-0.129227	1.15147
2020-04-03	1.69747	-0.430936	-4.03155	-0.761287	1.20122	-3.15129	0	-3.27132	-6.88004	-6.52032	60.5431	-3.2656	4.05908	-10.4799	-12.8576	-8.93088	0.864004	-0.480699	0	-3.84663	-5.14568	0	-1.02683
2020-04-10	2.7726	2.61192	0.315956	7.14063	2.65111	-2.71282	0	1.18065	1.62295	1.40847	-21.3843	10.6529	-11.041	-4.33976	-18.2773	3.13505	3.44335	3.81928	6.7834	2.89875	1.20763	-1.47636	3.78029
2020-04-17	0.0753824	-0.215073	-3.53167	-2.30321	4.26807	-3.25161	0	-3.70634	-0.0947418	-4.10405	-22.369	5.04197	-2.51059	3.07531	-3.15203	2.63975	3.94672	0.71927	-1.70273	5.94234	-0.555557	1.39012	3.12077
2020-04-24	-0.690642	-7.07117	-1.98026	7.04757	0.278164	1.11183	0	0	-6.6626	0	-13.5484	-1.00455	-36.5491	1.54885	-2.54666	-6.20033	-1.45958	1.46044	-0.397089	-2.20359	-7.16825	5.9863	1.67988
2020-05-01	2.03963	0.986834	-2.36099	1.99623	-1.68071	4.11226	-5.47249	1.9301	13.9718	-0.364964	20.967	10.9991	14.2083	-0.678878	36.2062	8.96731	-0.740022	-1.57445	-0.932718	0.26178	-3.60537	-3.76778	-2.40498
2020-05-08	-0.167415	1.98232	1.69209	-1.89934	4.14997	5.35952	0	0.119403	-6.27193	-0.549956	22.6384	24.3847	7.15503	3.05601	0.916737	5.31434	3.14334	1.28079	2.18479	-0.919245	-6.62636	-1.61637	3.08857
2020-05-15	-0.0350758	-2.3644	0.335009	4.15422	1.61294	2.97976	0	-1.68476	0.374532	-3.93678	17.4337	-0.263263	4.69683	2.52097	2.77483	-1.67758	-1.67805	1.752	8.41148	1.31063	1.64387	2.87425	-3.92856
2020-05-22	0.132012	-0.836101	0.33389	-1.19628	1.32452	2.01199	-0.941922	-0.364742	4.20922	0.951482	12.8893	9.1709	6.6008	0.404811	-8.16466	0.187793	1.99319	-0.445353	2.84886	8.3642	3.99521	1.9394	3.27762
2020-05-29	1.3072	-4.88481	2.95588	-0.0376152	2.34081	-1.60748	-0.950879	0.728159	0.0895656	2.24729	6.02557	-1.09348	2.60884	2.13174	1.03793	2.04278	1.7424	-0.275097	4.29496	-1.20483	0.260756	0.529857	0.602264
2020-06-05	-0.916519	2.48211	1.92314	7.41214	1.78349	4.20187	3.13505	3.32968	9.39256	-0.930239	10.4545	17.6596	11.1564	0.0852614	-19.2444	-1.85534	5.75574	-2.93961	-2.84272	-0.242719	0.260078	-1.63938	5.27082
2020-06-12	-2.05371	-2.64438	0.316957	-3.46547	-5.71584	-3.07393	-0.619197	0.350263	-0.7362	-2.45992	-8.5884	-6.85752	0.191755	-0.434817	-7.08102	-1.31953	1.61234	3.06947	1.2038	-0.121581	0.518136	0.350624	-2.54145
2020-06-19	-6.46828	-1.28718	0.630917	1.00757	-2.16225	-2.3493	-1.25002	0.696867	1.06167	-5.10917	9.16914	12.5744	9.93078	0.473548	-7.10916	-0.570886	1.16905	0.41671	1.02042	-0.243605	-2.45893	-0.020591	0.817807
2020-06-26	0.556304	0.0513954	-4.17396	0.464369	1.62605	3.46327	-1.26584	-1.86921	-4.14653	-2.4491	-3.04177	-9.05933	-7.19088	0.432767	0.376565	0.190658	2.10489	1.11493	0.394034	-2.59434	-2.19554	0	-0.6679
2020-07-03	-2.81204	4.81489	7.87809	5.69703	2.65268	-1.34615	4.05672	3.36264	5.03614	3.25232	5.15917	9.80964	9.08097	-0.618814	0.946206	4.10505	1.17312	0.837128	1.33931	1.12011	3.09193	-0.744113	2.43003
2020-07-10	0.0719566	-3.50808	-1.83491	1.93372	-3.73377	3.61639	-0.921666	-1.03153	-2.11562	8.43411	-0.0246518	3.08321	2.18864	4.76515	-0.0876424	-0.366301	6.35237	1.41667	3.64666	3.28697	2.02657	2.86318	3.91586
2020-07-17	-1.15514	4.11344	-1.24225	-4.8196	-3.8786	-0.54225	-1.55524	1.37302	-0.32949	0.914919	-0.0246579	-4.12684	-2.78617	0.839846	4.87693	2.17794	0.58177	0.519007	3.46673	-1.32612	3.98339	0.803217	-2.20693
2020-07-24	2.13624	5.01196	-2.21178	-0.573366	-2.57525	-2.28272	4.59499	0.679504	-1.74786	0.906625	1.66304	3.96564	3.28451	2.66393	4.7497	0	-0.399651	4.97983	15.6876	11.5623	7.70343	4.34426	3.24482
2020-07-31	7.55126	5.61652	-3.24704	1.07453	-3.54019	-0.88021	0	-1.13509	8.13981	-1.08894	-2.77898	-8.20007	-3.54169	-0.135816	5.57528	0.715567	-0.128382	3.74607	6.16106	-2.18588	-5.64856	1.38825	0.94746
2020-08-07	4.71685	-2.22143	-2.67574	-1.33625	-5.24003	-5.70241	-2.11808	-2.8954	0.309119	-7.18646	2.60906	3.02701	0.171527	1.99008	-0.169603	-0.357143	-1.79109	3.18797	14.4621	7.85967	4.03376	-0.62518	-0.706099
2020-08-14	-2.06763	1.0859	5.60278	0.331386	-2.56424	4.04177	2.41704	3.91755	2.81494	2.32569	2.13925	4.2818	1.02303	-0.287911	2.69809	2.64799	1.09967	-4.56493	-4.36687	-2.79666	-0.18622	-1.18526	4.82717
2020-08-21	-2.2353	2.04169	0.63898	1.62352	1.92932	-3.11015	1.18696	0.675678	-1.74049	5.22507	0.64004	3.17996	-3.10102	1.28565	2.87725	-0.524019	2.07545	-0.423875	0.374392	-5.61703	2.02959	1.65924	2.23708
2020-08-28	7.89526	1.36115	6.47375	1.09049	2.20481	-0.63351	4.04679	5.03389	-1.3062	1.62312	1.50097	0.957245	1.8206	-2.14021	0.958644	-3.92908	2.81645	1.35735	2.90943	3.27898	-0.641321	-0.132488	4.49873
2020-09-04	0.204018	6.17967	2.35999	-0.305499	-0.938974	0.927387	1.9636	1.16712	-4.58941	0.713015	-7.91702	-4.99544	-6.75212	-0.561899	3.54081	-0.914919	0.476652	-2.31665	-4.15028	-2.9462	5.10635	11.7783	-0.482715
2020-09-11	-2.53708	-0.775198	2.59007	-0.102041	-0.314961	-0.832178	3.0098	2.70568	-0.162075	-1.43115	-6.1302	-5.55276	-4.80092	0.901771	9.60231	1.0969	0.603717	1.36829	1.91124	2.83862	0.479199	-2.38512	-1.30979
2020-09-18	3.6642	-10.6568	2.8013	2.1546	-1.26986	1.72766	7.02499	4.32011	6.134	5.26437	9.59675	10.9145	6.17018	0.359852	9.93159	1.80185	1.2112	0.351062	0	1.07067	0.865432	-0.674685	-1.26677
2020-09-25	-2.60345	0.207198	-3.0858	0.481769	2.52379	-9.9895	-0.503779	-4.62859	1.13767	-5.80638	-2.53865	-2.54515	-3.50589	0.442743	5.63164	0.178412	-4.61702	-4.85116	-16.2039	-11.0224	-5.17242	3.88134	-4.38908
2020-10-02	-4.07852	-3.46093	1.97468	-0.265516	-0.625002	5.4159	2.7399	2.54208	0	8.00427	-8.21668	-5.66421	-2.08736	0.0911162	2.41039	-0.895261	0.0488912	2.42198	3.89521	5.77528	4.78391	2.16376	1.07385
2020-10-09	-1.60519	0.557415	3.56691	3.14059	1.24612	1.81316	3.14415	5.27982	3.70138	0.998344	9.16078	5.35248	9.33035	-1.02811	1.13257	1.60574	3.3163	0.96039	3.46569	0.112171	5.79751	-0.524248	5.41986
2020-10-16	-2.85262	-1.9836	1.86921	3.83842	0	-2.03063	2.81709	-2.1175	0.507431	5.00508	0.64087	-2.94091	-1.05357	-0.724589	0.16623	-3.42068	-0.647827	-1.19287	-1.63536	-2.49729	-4.97907	2.46606	2.79227
2020-10-23	4.55565	-1.26482	6.40424	2.52481	4.83478	-0.877752	7.36118	3.62982	1.57823	1.25197	-2.41215	-3.99498	-3.96091	-4.78994	-0.127845	-4.87902	1.89236	-0.17827	1.31042	5.26143	2.66682	-0.643089	0.382605
2020-10-30	-6.64091	0.324862	-4.30992	-3.02193	-0.888895	0.745812	-1.95446	-2.46926	-3.84523	-5.59698	-10.8638	-8.02787	-6.44773	2.05796	-4.82211	3.58868	-2.13508	-1.01305	-4.28073	-7.35209	-7.18613	-2.61453	-3.60283
2020-11-06	1.40309	1.81497	2.55768	0.140067	1.76996	0.653392	0	4.14372	4.6251	2.27652	3.66382	3.91134	4.03126	-0.661621	-4.61557	0.739375	3.33548	3.69939	7.99447	6.69564	9.49837	2.96874	1.35004
2020-11-13	0.73266	1.33069	0.754721	0.0777303	2.88204	6.0412	1.52342	3.62358	-0.141343	-1.45752	7.70211	3.22878	4.14615	1.53703	-1.48717	1.64387	0.450318	-3.04859	-3.30773	-1.5487	-4.93618	3.33496	3.39189
2020-11-20	12.4231	2.85226	3.44862	5.61997	0.283688	4.03395	0	3.75426	1.40452	0	5.03036	3.73844	8.3923	-0.538928	-3.26329	-3.8786	4.16399	-1.01515	-1.46941	6.37021	0.214179	2.21377	1.61661
2020-11-27	0.780141	4.27355	-0.729043	0.877584	-1.13961	1.17081	0.645858	0.512822	-1.61691	0.812352	8.20375	8.73102	8.5835	1.42114	-1.51518	3.8786	3.05108	-4.87707	-7.11392	-0.734911	1.06407	0.439961	1.86474
2020-12-04	-2.97046	-4.4084	0.486619	-2.14904	0.855925	-1.99888	-3.49381	-1.71973	-1.64348	-2.45713	1.41599	-1.87455	0.455928	-0.447363	-1.53849	-1.27623	3.45546	2.71995	6.28815	11.0615	-0.509339	8.61027	-0.340903
2020-12-11	-1.95067	2.02153	0.242424	3.66652	8.44038	-5.99835	-1.3423	-0.783635	-0.0720721	6.26711	0.775699	3.87953	2.61893	-1.24433	-1.26962	1.27623	0.0541736	0.634319	-0.457096	-4.93092	-0.768906	6.63598	5.25609
2020-12-18	-3.28826	2.31798	4.03376	4.41898	2.06726	0.962429	7.37862	5.44352	0.503417	-0.938974	5.12504	6.72735	5.32117	2.16573	-3.78055	0.901719	2.71963	2.07147	7.46136	2.8336	-0.0428908	0.0259909	1.1505
2020-12-25	1.38516	0.840629	2.97846	-1.40964	0.255428	0.622465	3.4947	3.41775	1.35378	3.24855	-1.76923	-1.22606	-1.12677	0.186126	-3.16713	0	-2.5161	-0.308291	-0.309718	-2.8336	-0.0429092	-0.156047	-2.84847
2021-01-01	1.6008	1.17189	7.81308	2.37926	3.0153	3.81794	2.9853	4.30595	4.56511	2.40613	0.352222	1.78476	-0.99645	-2.3665	0.0329979	-0.179695	-0.280288	1.02379	2.26193	5.6828	0.5137	0.0260247	-2.2616
2021-01-08	-2.84114	-3.4615	2.06619	2.45666	2.68636	-0.426141	1.55645	4.56837	0.740994	1.62126	7.54662	9.17648	5.96985	-0.286018	5.2851	-0.360361	4.652	-2.28002	-3.04045	4.03725	3.89415	2.67025	6.1513
2021-01-15	1.91664	3.24176	6.7219	1.51349	0.48077	-1.81733	4.15939	3.87701	5.03868	5.12933	0.210748	-0.976863	0.604637	-2.42337	2.54899	-0.542988	-2.24981	-1.60363	-3.09549	-2.45802	-0.494031	1.5586	1.90621
2021-01-22	0.440735	-2.89278	-6.92661	1.15578	-0.722025	-3.31156	-9.5125	-8.67553	-3.11107	-6.89929	0.0573998	1.06577	-1.14518	1.18185	0.486915	2.33194	0.704295	1.55457	2.74317	0.734622	-2.84657	-2.21951	1.44451
2021-01-29	-0.461137	0.434519	9.19513	-0.960049	-1.45988	-4.27634	0.406505	4.21115	-0.131752	4.0822	-0.229797	1.08594	0.742494	1.43962	3.56355	2.2788	-1.65368	0.211741	6.30669	1.54338	-1.19608	-1.77542	-3.21496
2021-02-05	0.425485	1.60003	0.559181	13.389	-2.23058	0	-2.04925	-0.221157	3.68854	-3.04592	8.52204	4.73389	6.69733	-0.706145	3.07228	-0.173461	0.818275	-2.7152	-0.739102	0.986113	0.471598	0.724266	1.89255
2021-02-12	-0.701521	-1.69547	-2.0658	-4.5847	-0.250941	0.570933	-1.88093	0.368325	-0.127146	-0.739102	4.644	2.37909	4.36858	-0.0960083	5.71426	0.173461	5.22563	1.01899	1.32647	8.54491	0.724486	6.26844	2.9512
2021-02-19	-0.974279	4.68001	1.13209	2.14935	2.48152	-1.71955	-1.70217	0.513386	7.65133	2.05587	-0.640704	5.35715	2.37965	4.18205	4.2034	-0.695655	6.87594	-2.30191	0.511137	5.8068	0.339127	6.70544	5.34236
2021-02-26	5.54916	5.11028	2.04278	-1.94662	3.37381	-0.624841	-1.95022	1.95588	-2.14422	0.724116	4.02806	4.89485	1.05264	-1.98239	3.73686	-2.11648	2.1288	-3.28843	-4.54454	-7.20888	-0.042328	0.25999	-5.29929
2021-03-05	-0.843985	-6.12594	-0.738011	-1.28291	-0.237248	1.08276	-2.66091	2.47976	-3.9293	-1.16112	7.10163	7.74204	4.93717	-3.25441	5.56703	-1.98026	-2.5045	-1.8309	-5.00104	-6.96457	-0.594482	0.0225759	-12.312
2021-03-12	0.818055	2.08669	-1.86921	-0.156995	0.945634	3.69319	-4.59851	-1.19678	-0.880509	-2.06497	-0.744288	7.58024	0.110681	0.00746687	4.61523	1.80185	2.11256	0.85653	3.15484	5.45826	0.42499	-0.850104	-2.54037
2021-03-19	-3.13144	-2.26256	3.70413	-2.32313	-1.90029	1.17324	1.1696	0.0707965	-1.84895	-1.80456	-6.55249	-15.6766	-7.82007	0.246094	3.69151	-1.6202	-0.341109	1.69941	1.84621	-1.10217	10.345	0.352253	1.77029
2021-03-26	-0.585461	0.276232	-0.546948	-6.47695	2.36978	-3.82449	-1.1696	-1.64114	-3.13751	-2.76941	-0.817265	1.83703	-1.62801	3.3616	4.91445	2.50909	-1.16967	-0.391568	-4.56131	-1.02829	0.875696	-1.69302	0.550662
2021-04-02	-1.7056	-4.62772	0.909924	-3.25963	-0.705056	-0.790518	4.59851	0.287357	-2.28351	-0.469117	0.784702	3.65107	1.74756	0.681862	2.75488	0.70547	-1.94246	-0.208501	-1.12316	3.22062	0.0757863	-5.96589	-1.07353
2021-04-09	-2.96505	3.7124	3.73377	6.08331	-1.66472	-0.0883947	-6.25928	0.572248	4.58095	4.29514	-3.5132	-2.07217	-1.1415	2.51461	1.77241	0.350878	1.58776	0.76258	1.87818	0.333056	0.1514	-3.31164	2.5213
2021-04-16	3.19477	1.65653	1.3865	1.66681	2.6037	2.65923	1.89579	2.53535	7.25772	2.22726	6.32305	3.67387	4.95092	-2.27884	1.81867	-2.84211	3.21298	2.04849	3.15631	-0.333056	4.47477	-1.29955	-1.60653
2021-04-23	0.345684	4.05697	12.4454	6.55632	-1.41179	-0.214758	5.48082	7.62912	1.73501	8.03815	-1.56378	-3.10724	-1.44804	-3.35989	3.23358	-3.67014	3.77002	-0.177232	-0.191975	3.68441	5.11124	-1.16085	0.195372
2021-04-30	-2.19024	1.90978	3.8753	-0.854503	0.472814	-3.51135	-0.445435	-0.0644538	1.35495	3.20027	2.10065	4.37234	1.56298	-2.14083	-0.0653381	0.186741	2.5503	-0.29891	-0.346487	-2.11218	2.41057	5.20714	7.51182
2021-05-07	3.04096	5.93317	8.40831	1.86568	3.01997	3.03482	4.36751	4.16727	2.59905	2.59082	2.27318	3.17	4.87628	-1.88757	2.76261	1.48151	5.83898	3.58487	5.62367	2.11218	-4.21367	3.39016	2.28223
2021-05-14	1.97929	-4.23579	-12.8934	-5.63055	-7.85183	2.34095	-4.81493	-0.869571	-2.89205	-7.29283	0.552657	1.4295	1.35835	2.84056	1.19178	-1.66825	-1.99188	0.121991	-0.109429	-1.45752	0.104913	1.38325	-3.0205
2021-05-21	-1.57193	3.33301	2.8638	-2.70965	-5.07723	2.27433	-6.2448	-4.00945	-1.35896	-5.51376	-2.65276	-4.55565	-2.67995	1.30585	0.349416	1.29993	-3.45618	2.02687	0.0364897	-2.31033	-1.0188	0.12907	-4.3869
2021-05-28	-1.05349	7.14923	-1.04557	-0.894118	5.32445	0.700609	0.476191	0.259404	3.50708	-1.61176	4.157	2.61978	2.46385	0.338509	1.44731	-1.11318	3.78604	1.0753	1.59251	-2.36498	-0.531069	0.701101	7.57869
2021-06-04	-0.295082	0.0415139	3.68502	4.6135	2.19789	2.95483	-0.476191	3.3124	2.15917	3.48366	4.79927	2.53902	2.35179	3.57194	2.6703	-0.561274	-3.05902	-0.0506669	0	-0.858374	0.813156	-0.396687	-0.514766
2021-06-11	-1.47798	-2.13243	-0.289855	1.45952	-0.727276	-1.08281	-2.17138	-5.07658	-0.507186	-1.00359	2.03464	-0.985459	-0.158604	-1.04034	4.51419	1.48979	0.357527	-0.633917	0.715567	-0.605276	-1.88383	-0.527458	1.14218
2021-06-18	0.156855	-3.30466	-4.60363	-0.995033	-1.47061	-3.27818	0	-8.38403	-5.93542	-1.89097	0.89737	-0.68906	-0.903541	1.18909	-0.997658	1.46792	-8.96496	-5.81371	-7.43548	-7.47086	-8.84803	-0.341398	-6.06726
2021-06-25	-0.0994408	3.08535	-6.10997	1.71688	-2.24729	2.26507	-5.77325	-5.60205	3.47605	-5.1216	3.52453	4.0965	4.28488	3.4095	-5.52787	0.363637	2.90325	0.281702	0.0767754	2.85602	3.27772	-1.66472	7.67818
2021-07-02	-1.50662	-0.682208	8.9566	-0.0239779	4.9271	3.72672	9.13088	9.05432	4.14009	0	1.55104	2.59373	1.72418	-0.150613	-2.59939	0.362319	-0.404293	0.152608	1.33412	-0.912415	5.28285	7.14838	-0.981969
2021-07-09	0.430697	-0.185569	-10.7496	0.57389	-1.69701	0.780927	-6.32814	-3.8833	-4.02435	-6.0528	-1.08051	-0.639939	-1.36676	5.24505	-1.04808	-2.74994	1.39897	1.36697	-1.06586	-0.0917011	0.752827	-0.0670017	2.18402
2021-07-16	-1.01206	7.49853	4.18741	3.17971	11.7511	1.03094	-1.26424	4.57343	2.34363	10.8803	-3.8277	-0.822464	-1.74812	-2.02929	1.94286	1.10907	-0.964323	0.238068	-1.54265	3.95735	-3.41479	-0.0670466	1.70827
2021-07-23	0.0169301	9.809	-1.26986	-0.439816	3.20883	6.96629	-3.36384	-2.78958	2.56567	-1.1852	0.666669	2.19876	1.3907	2.04879	-0.0356379	0	1.09869	-0.753705	-1.96239	-5.34305	0.809721	-0.111844	1.57123
2021-07-30	2.27493	-5.03987	-0.159872	-0.570001	0.210305	-2.47494	-0.527706	-0.995033	-1.21885	2.06497	2.31248	2.8542	3.81381	1.1182	-0.160528	0.732604	2.14636	1.3412	1.3386	-2.92612	-2.59948	-0.134379	0.924886
2021-08-06	2.02535	-2.66392	-1.28826	2.97672	-4.73207	2.33096	2.35305	-1.00503	4.36274	2.45146	-7.97948	-4.0403	-7.51311	0.461717	-0.743564	-0.365631	-2.66376	-3.30595	-5.01207	-4.6064	0.112803	-0.134559	-1.74384
2021-08-13	4.38038	3.80119	0.323625	3.35165	3.67609	-0.0366585	2.80273	1.00503	6.40715	4.32123	0.146391	-0.0928444	-1.12091	-0.48743	-1.39444	0.911583	1.01641	0.587855	-2.07735	2.76971	-0.565293	1.00481	2.27435
2021-08-20	-0.23628	-1.06147	-3.95439	-1.41158	5.7748	0.681668	-1.26424	-5.20455	-1.30984	-7.50529	-9.36293	-12.0075	-9.45054	0.122081	-1.6271	0.542988	-5.3654	0.463881	-2.63733	-4.89853	-14.1881	0.862742	-6.26139
2021-08-27	0.618801	5.84345	0	2.59812	6.21559	5.19216	1.26424	-0.150602	2.35541	0.293686	10.0626	12.954	13.0355	2.42963	-4.17299	0.360361	4.11315	1.39326	3.34848	1.52519	5.30122	0	2.9249
2021-09-03	1.86956	0.303292	-11.9465	-0.705873	-2.86553	-6.09659	-3.06146	-5.0223	-1.49703	-3.43061	0.723697	2.34704	3.36081	-1.5092	-3.3705	-3.47702	-0.0344933	1.43848	3.07843	1.50228	-0.579952	1.31293	4.01085
2021-09-10	-1.02157	-0.392671	-1.52675	-0.382159	1.53849	1.78334	4.30992	-0.556219	-3.89593	-8.21947	0.689856	-1.36168	-0.854921	-1.33224	-2.69438	-1.31211	2.76385	-2.16973	-3.41246	-2.92507	-9.03784	10.3184	3.00164
2021-09-17	1.70331	0.422356	-1.94181	-2.582	9.11377	-0.165688	2.9342	0.318218	1.6075	6.38175	3.19948	-0.867127	3.27898	-0.867769	-3.5106	-1.13853	-3.9733	-2.28226	-6.1226	-2.48717	-8.34212	-4.06178	-5.20369
2021-09-24	-2.31884	3.51118	-2.78348	4.14504	4.92878	-0.177203	-1.94653	-1.11822	0.102828	0	2.85792	-1.10012	4.258	0.725815	-2.7272	0.570886	0.3914	-0.100966	0	1.66497	-4.03484	3.15572	0.149697
2021-10-01	3.85595	4.24713	3.17487	8.72985	2.61881	-2.85053	-4.78078	-3.09976	0.205339	0	2.43703	3.61527	5.95495	-1.52248	2.73783	-1.91577	-2.25945	0.223471	0.355082	0.309119	-1.66065	0.296355	-7.58434
2021-10-08	1.39343	-0.59501	-2.37165	5.81832	-0.974034	-4.03332	-1.55847	0.0828157	1.52675	0	4.55208	3.84292	3.12797	0.712072	-2.63953	3.42239	2.72925	0.190582	0.970025	5.69869	6.7282	3.85072	6.72441
2021-10-15	-3.80312	-0.105045	-0.803217	-3.06349	5.39814	-5.92708	1.04168	-2.34517	-1.68071	0	3.50783	5.43871	4.06509	0.182102	-5.29034	0.373135	11.5582	0.792554	2.34182	1.92499	3.6979	5.10655	4.07283
2021-10-22	-1.70409	-0.210421	2.39055	0.88898	6.72397	2.5151	1.54245	0.422834	-3.71479	0	2.56424	-0.186865	-0.866163	1.28476	-4.59282	-1.31211	-6.68059	1.8398	3.90888	1.23166	-5.12685	-0.0721761	-1.41354
2021-10-29	-2.40934	1.51289	5.73771	6.08261	6.16442	-3.00183	-1.02565	1.34118	1.11318	0	-1.22599	-1.34557	-3.02799	0.428869	-4.71285	0	-0.493251	-1.65052	-1.3696	-5.11942	-2.15709	-9.57796	-1.48521
2021-11-05	-4.89472	0.750656	-0.37244	1.38731	3.47164	-3.08149	-1.8206	-1.59466	3.36907	0	-2.73158	-3.08827	-1.15956	-1.24688	0.16409	1.86921	-0.567443	1.87669	0.458621	1.86554	2.80018	-0.099374	-0.0720128
2021-11-12	1.88857	5.35451	4.73677	0.466982	0.523561	9.15083	5.36527	3.24623	0.559087	0	-0.468789	-1.85	-2.13935	0.522498	-4.01443	-0.371058	0.89824	2.8258	4.9503	4.47055	1.51703	-2.13031	2.76576
2021-11-19	2.8655	2.93074	-0.893661	0.0263678	3.08508	-1.65841	0.248447	1.78576	-0.152168	0	-6.06633	-5.31294	-5.25483	0.551779	-4.41534	0.925076	-0.89824	-0.145083	-1.43543	-3.69535	0.966658	-2.23898	0.324814
2021-11-26	-5.82718	3.41775	3.00642	-4.17232	0.252845	-2.32007	-3.79312	-0.807759	-3.82871	0	2.86233	4.15691	3.83259	3.14907	-3.17841	2.72496	-1.87328	-3.29682	-7.54682	-5.76128	-14.5212	-0.0831255	-0.736089
2021-12-03	1.98994	0.538463	-0.174368	-7.12927	-5.58224	-1.76612	5.51518	1.60905	-3.16126	0	-16.5257	-15.7964	-13.187	-0.534628	0.254633	-1.44407	-0.902514	-1.36814	-2.90003	-3.96298	0.775627	1.9558	0.666218
2021-12-10	-0.407905	-3.53311	0.868815	1.97775	4.31158	3.77582	3.35763	0.239139	4.99042	0	7.70838	8.8665	7.85487	1.07258	1.95865	-0.913248	0.220082	0.561831	-1.12084	0.530505	-2.34517	-8.84024	-1.42802
2021-12-17	1.87282	1.36654	0.689658	0.988729	0.510205	1.96877	-1.18625	1.42295	-2.99628	0	-1.09367	-0.776808	-2.5342	-0.904423	1.03371	-1.10702	-0.415297	1.03391	1.52128	-1.06384	0.507186	0.0445335	-0.497539
2021-12-24	-0.69726	-1.76471	1.70362	1.42263	-6.43689	5.28864	5.3439	3.16751	0.850165	0	4.0884	2.08191	6.87669	-0.261699	-2.45692	2.38325	1.33772	0.274098	1.67331	3.77799	6.05254	2.85295	2.00042
2021-12-31	2.29816	-0.977231	-2.04785	2.96895	5.6706	1.5116	2.45822	-0.380953	-1.49257	0	1.9301	0.730011	-0.0452182	3.11422	0.964975	0.361664	1.50637	0.770635	1.60281	-1.24354	4.29784	-4.9223	3.49038
2022-01-07	0.0852337	3.76079	2.38512	2.20604	-3.25762	0.994772	3.68406	5.78367	-4.22328	19.7152	4.75694	3.26974	7.11314	-2.05916	3.88995	-2.18987	-0.500499	-1.70118	-4.25783	0.104221	-3.55983	4.43431	-0.110867
2022-01-14	5.02755	0.647815	-1.86921	3.98808	-6.71025	3.08898	0	-3.29579	1.39084	-3.09303	5.92238	5.25639	5.6901	-0.111187	1.59366	0.735297	0.393879	1.63861	2.87313	1.95984	-1.80185	0.0108702	6.80471
2022-01-21	-2.50095	-1.57361	3.04077	0.744771	1.9636	2.32336	-2.58635	3.29579	2.83243	4.22869	1.58602	0.532904	1.50082	-0.433571	3.13863	0	2.57442	0.595069	5.88032	6.6197	12.1697	2.15062	7.93978
2022-01-28	-3.38264	-0.554698	3.43452	2.41828	0.277393	-2.75902	3.43381	3.95532	-3.72034	0.874459	2.90479	4.68787	3.99592	-1.66493	4.77438	0.365631	-4.37623	-2.62514	-9.02286	-4.19779	9.73742	6.38734	-7.31992
2022-02-04	6.24519	2.43144	-2.27652	2.21472	8.36586	-3.86283	5.34008	6.04617	-0.390953	-4.45083	5.11393	4.52566	4.45664	1.06725	4.42877	2.34456	3.2329	1.07398	1.11783	1.28778	-1.77686	1.38753	2.90822
2022-02-11	2.83421	3.75286	4.81634	-1.22068	3.99554	-1.58765	1.58733	2.06459	0.335196	4.20176	0.895512	3.11977	2.98106	1.86829	5.26258	0.178094	0.240327	1.62701	3.40942	0.686614	-2.79335	2.33474	0.260632
2022-02-18	-5.17334	-2.17044	0.469117	-2.29282	-8.02467	-0.950903	-1.38753	1.01653	-0.840106	-0.124766	-1.99616	-2.47923	-7.28715	-0.608615	5.08347	-0.356507	1.16308	3.31977	2.88033	6.43552	5.93542	1.94255	4.63267
2022-02-25	-1.19825	-2.81993	0.777005	-1.76981	-3.37186	-0.183261	1.78046	-0.570525	-0.507472	6.17256	0.459168	1.41651	1.60421	-1.4034	3.97335	-2.3488	-0.923331	-0.428266	-0.167154	-3.35539	-1.70944	1.90553	0.894759
2022-03-04	-0.560065	-5.55546	11.8127	-1.91539	4.95084	8.1542	2.89875	4.11017	8.0347	22.7827	23.3301	20.4708	32.3756	-2.88018	0.191561	-4.67812	7.60794	3.83583	6.7123	3.44701	24.531	6.83018	17.1515
2022-03-11	1.019	0.236249	2.04228	3.95471	-2.64566	-5.76985	7.87232	0.729487	0.3125	-2.45992	-5.74176	-6.59113	-8.28579	-1.98915	1.56901	0.573067	-5.2883	1.12062	1.62921	-3.25762	-6.94748	-0.7982	50.7389
2022-03-18	-2.9777	-0.638125	-2.45579	4.66691	2.51502	5.78176	-3.03866	-0.485733	-1.94283	-3.70774	-4.31843	-2.01784	5.54441	1.70555	0.937584	3.0021	1.72142	-2.6943	-3.6838	-2.19999	-8.72086	0.104475	-26.327
2022-03-25	0.915734	0.566282	1.23543	6.79595	5.34478	1.1034	0.181324	2.34597	3.43963	6.16766	10.4309	5.66702	10.7148	0.116114	1.1039	-0.185014	-0.758168	1.45634	1.58419	-2.24948	-1.47032	0.104366	-3.93388

## Sheet: Volatility（市场波动率）
市场波动率	Cocoa	Coffee	Corn	Cotton	Oats	Orange juice	Soybean meals	Soybeans	Sugar	Wheat	WTI oil	Gasoline	Heating oil	Feeder cattle	Lean hog	Live cattle	Copper	Gold	Silver	Platinum	Palladium	Aluminum	Nickel
2011-01-07
2011-01-14	0.594241	1.54274	1.44207	2.20913	1.8706	1.39875	1.85087	2.08524	2.53304	3.05267	1.00031	1.16496	1.17184	0.407107	0.415196	0.809332	1.43475	0.973942	2.03813	1.07915	2.63722	0.648195	2.54662
2011-01-21	2.62014	1.48355	2.02462	2.07347	1.57946	1.03162	0.803406	0.380582	1.61321	1.7921	1.03892	0.880727	1.46999	0.172138	0.580822	1.24856	1.42436	0.886448	2.52573	1.31369	1.93265	1.14783	1.22397
2011-01-28	2.67238	1.98182	1.62645	1.48686	1.14334	1.01815	0.842831	1.28541	2.01711	1.79444	2.76208	1.91133	3.16743	0.187869	0.260349	1.0119	1.79253	0.751747	2.122	1.18826	2.45385	2.01417	1.20243
2011-02-04	1.83949	0.962999	1.41511	2.66135	2.14114	0.668996	0.528003	0.826919	4.08607	0.981566	1.99412	1.32069	1.39693	0.120009	0.395097	0.863634	1.16355	0.467576	0.538172	0.792827	1.23055	1.27212	1.31099
2011-02-11	1.93728	1.11685	1.45082	2.7911	1.67128	0.694061	0	1.10341	2.31987	2.02144	0.690954	1.16313	1.48279	0.363251	0.300025	0.750802	0.680619	0.509169	1.38479	0.801359	1.13837	0.924905	1.24116
2011-02-18	0.505221	0.980014	1.80972	2.15836	1.73295	1.15239	2.03908	2.21965	2.29498	2.59562	0.985108	1.41627	0.620116	0.164273	0.484104	0.47367	1.56524	0.400077	0.85274	0.524962	1.2108	0.302759	1.46066
2011-02-25	2.14796	1.47387	2.65666	2.79986	2.05284	1.79366	2.11854	2.67758	1.86159	3.06848	3.70831	2.41736	3.84509	0.116715	0.173446	0.382234	2.05749	0.65775	2.09396	1.22745	2.99028	1.20385	2.57949
2011-03-04	0.742155	1.15748	2.95713	1.15101	1.09208	1.43054	1.20434	1.11835	5.20959	2.67295	1.35102	1.62447	1.17923	0.105205	0.185807	1.44756	0.573979	0.890084	1.63193	0.861584	1.39831	0.587472	1.47502
2011-03-11	1.35443	3.10042	0.980377	2.64118	0.98859	1.46462	2.00819	1.04282	2.70605	0.691567	1.06339	1.43587	2.23023	0.153672	0.450754	0.769949	1.88687	0.756301	2.16847	1.0974	2.644	0.341675	1.80195
2011-03-18	2.98445	2.20206	4.95033	3.56413	4.5519	0.627956	3.38582	4.54678	4.55201	5.58813	2.69103	2.29914	3.64361	0.381581	0.118007	1.35436	1.68012	1.35186	2.72209	1.7794	3.91257	0.50611	3.29885
2011-03-25	3.18087	1.27868	1.9073	2.61785	2.95809	1.69627	1.00128	0.600564	2.83429	1.67104	0.966201	0.616802	0.40896	0.340533	0.249511	1.01333	1.43479	0.789238	1.82446	0.785091	1.50791	0.50139	1.36438
2011-04-01	2.65594	1.24326	3.78619	2.62336	2.14203	0.430453	1.26121	1.53709	1.63027	2.82985	1.42187	1.19341	1.26019	0.263414	0.213511	0.501646	1.21647	1.06505	0.653634	0.912743	1.31995	0.969371	1.87976
2011-04-08	1.31173	2.22107	1.5859	2.39441	3.07217	0.77022	1.64933	1.25999	6.74575	2.68443	0.945557	1.55088	1.21617	0.216688	0.213022	0.50709	1.10627	0.284853	0.809376	1.1404	1.57426	2.02051	1.94967
2011-04-15	1.02264	1.17816	1.46553	0.947437	3.23267	1.07907	1.41118	1.29306	1.3535	2.3102	2.25454	1.61992	1.92598	0.275599	0.506142	0.883124	0.940352	0.962128	2.47489	0.720352	1.70209	1.12726	1.98505
2011-04-22	1.4102	1.32401	1.30388	2.57893	1.23803	1.12704	0.413974	1.56085	1.9445	1.83459	2.01697	1.40385	0.952447	0.222687	0.247332	0.537934	1.68951	0.387744	1.6569	0.683935	2.28377	2.25337	2.60001
2011-04-29	0.946213	1.11173	3.48969	1.95251	4.42961	0.943872	2.03143	1.9343	0.564257	4.09064	0.40128	0.762553	1.16346	0.6691	0.241122	1.69483	1.13507	0.863158	4.75562	0.564083	1.6311	0.666895	0.621981
2011-05-06	2.67317	2.14498	1.81786	3.49484	2.18195	1.25937	1.56914	1.22229	1.29145	3.59298	3.17129	3.15069	2.87725	0.324312	0.352082	0.506483	1.71438	1.42614	3.02825	1.24662	1.67752	0.640847	3.36948
2011-05-13	1.26229	1.06286	2.5968	2.64932	2.84848	1.52126	0.897507	0.879712	2.83941	3.26906	3.57413	2.47536	4.37924	0.250802	0.317718	1.55607	1.29146	0.909806	5.08011	0.995204	1.08077	1.17651	1.25675
2011-05-20	0.5957	1.94078	1.55138	2.70087	1.70714	1.30408	1.66966	1.28685	2.39402	3.28073	2.21984	1.49217	2.46247	0.328239	0.21172	2.2641	1.65589	1.39352	3.08751	0.571054	1.20552	1.50656	2.46886
2011-05-27	2.03203	0.767098	1.91701	1.71609	1.58823	0.560236	0.477886	0.435217	2.4528	2.02586	1.71919	1.86511	0.961798	0.678599	0.263735	1.45385	2.19618	0.659331	2.64749	0.693437	1.40053	0.353717	3.21234
2011-06-03	1.21442	1.74187	1.39058	1.42347	0.94877	0.706468	1.18135	0.679209	2.66657	2.76773	1.57745	1.46851	0.962302	0.40005	0.657117	1.02831	1.53783	0.770826	2.8722	1.22287	1.34176	0.298069	2.01213
2011-06-10	1.2165	1.86338	2.6266	3.41555	2.6149	1.37104	1.1576	1.19406	1.10307	1.40379	1.74028	1.55843	1.50284	0.440382	0.49849	1.26333	0.829803	0.650191	2.32883	0.460642	1.28625	0.676083	1.38182
2011-06-17	1.9559	1.15816	1.86886	2.7065	3.10828	1.26661	1.32767	0.588415	1.78113	1.67031	2.59856	1.91162	2.06027	0.802482	1.01547	0.905432	1.48535	0.535182	1.91623	0.559885	1.23083	0.931087	1.22541
2011-06-24	1.85927	1.35306	2.25135	2.72486	1.01684	2.01113	1.12345	0.936046	1.60169	3.08992	2.35187	2.36304	2.34195	0.767732	0.338546	1.31533	0.904759	1.27999	2.10262	1.32499	2.45254	0.400813	0.614201
2011-07-01	1.8462	1.5441	3.08468	1.67628	2.58457	0.702314	0.349432	1.3219	2.47834	3.20038	1.35279	1.75647	1.82591	0.296465	0.432992	0.609534	1.3343	0.85281	2.30236	1.0347	1.93555	1.69516	1.61172
2011-07-08	1.05619	0.969972	1.52997	0.861852	1.28069	0.607151	2.00465	0.720979	2.13056	1.94178	1.96143	1.80071	1.91349	0.431293	0.476276	0.496994	1.20254	0.555	1.46736	0.527644	0.824186	1.32214	0.857212
2011-07-15	2.76814	1.75341	2.61797	3.3578	1.54473	1.47682	0.753497	2.07617	2.96413	5.58109	1.92338	0.667034	1.3011	0.107059	0.38043	1.15841	0.68937	0.96716	3.4412	1.21534	1.91006	1.14678	1.86162
2011-07-22	0.417026	0.944037	1.2399	3.41021	0.627827	1.01165	0.654541	0.244636	1.76787	7.29088	1.09229	0.992529	1.19039	0.694393	0.392775	0.301297	0.951628	0.558416	1.94551	0.547412	0.662782	1.15441	1.02442
2011-07-29	1.86497	1.22674	1.49663	2.40754	0.899529	0.548613	1.16659	0.940677	1.83812	1.83475	1.23851	0.542527	0.785508	1.00806	0.251114	0.772888	0.833963	0.753211	1.8831	1.0419	2.04803	0.53664	0.961226
2011-08-05	0.367015	1.31515	2.02933	2.91917	1.97964	2.12814	1.39161	1.19427	1.01922	2.88208	2.27632	2.07761	3.71382	0.201525	0.179513	0.955488	1.32007	0.92593	4.07685	1.37076	2.72656	0.842157	2.45207
2011-08-12	1.03903	1.04094	2.16645	2.21543	1.07593	4.03759	1.72125	1.62096	1.53916	2.35184	4.4547	2.44425	2.54242	0.353534	0.259619	0.715039	2.30621	2.00853	2.37484	0.348281	1.39125	0.203286	3.11327
2011-08-19	1.92826	1.4474	0.712179	2.47022	0.970352	0.556006	0.794339	0.696803	3.11519	4.69692	3.46155	1.97652	2.65742	0.238479	0.498747	1.22778	1.4528	0.86853	2.1615	0.96076	2.33856	1.0483	1.87492
2011-08-26	1.86841	0.47626	1.27929	0.980062	1.63119	1.23139	0.827103	0.789892	1.42203	5.9771	1.13313	0.775288	1.70943	0.315376	0.160116	0.659215	1.16718	3.26544	3.45371	2.00671	1.04713	0.697462	1.74073
2011-09-02	1.01384	0.717928	2.50263	0.48848	2.14111	1.49866	1.44101	1.3836	0.686958	0.552456	1.99885	1.35232	2.97374	0.33883	0.875733	0.596534	1.11169	1.4918	0.892768	0.844309	1.41072	1.25934	1.71135
2011-09-09	1.55109	1.98931	0.875887	1.69321	1.59316	1.12107	0.92734	4.54702	1.00456	0.990537	2.18221	1.49361	1.91957	0.421525	0.860651	1.12334	1.8939	2.59909	1.51891	1.35613	1.89249	1.17867	3.73481
2011-09-16	0.718685	1.02403	2.0926	1.78196	0.859828	0.715196	1.05127	0.971254	3.24219	1.76361	1.67427	1.62048	1.57291	0.121348	0.807449	0.81693	0.975165	1.37016	2.27704	0.973174	2.03746	0.590476	1.70382
2011-09-23	1.34569	1.83766	2.13876	1.94314	1.88597	3.00708	0	1.08028	2.33503	2.01136	2.95298	0.999641	1.81297	0.274938	0.187808	0.923502	3.11301	1.97524	6.37821	2.00381	3.67666	1.89393	3.18827
2011-09-30	2.19686	1.53703	3.62846	1.84126	1.36301	1.5947	2.33714	2.0972	3.45778	4.42587	3.75873	1.6756	2.42042	0.324885	0.330391	1.27445	3.44908	2.78519	5.39955	1.91119	1.98546	1.29674	4.10923
2011-10-07	1.15361	1.93842	1.40849	1.87292	0.687858	0.755042	1.5512	1.2407	2.73934	2.22176	3.40058	1.63772	2.24566	0.22709	0.324119	1.03874	3.18931	1.49716	3.16883	2.52315	5.42354	2.00176	4.02442
2011-10-14	1.0442	1.70454	2.86009	1.86837	2.69519	1.19939	2.4775	1.74151	2.26953	4.81077	2.10026	1.22955	0.851454	0.228397	0.151129	0.687807	3.10039	0.82404	1.59972	1.31049	1.57828	1.05122	2.75896
2011-10-21	1.33709	2.83	2.41807	1.27264	0.290288	0.652265	0.254099	0.921329	1.11428	1.44842	1.83302	1.52797	1.81661	0.440846	0.16811	0.718712	4.69745	1.9097	2.10606	2.16208	4.36993	1.85623	3.23382
2011-10-28	0.963342	2.53199	1.67004	1.46874	1.4348	2.03255	0.689594	2.38477	2.02191	2.614	3.18778	1.29448	2.6274	0.123004	0.486974	0.836407	3.5092	0.532441	1.55913	0.736333	1.57155	1.41701	3.94538
2011-11-04	2.47848	1.74862	1.10059	1.16247	0.535659	0.567106	0	1.29244	1.33408	2.60908	0.992432	1.13455	1.20683	0.137651	0.243484	1.27769	2.14471	1.48737	3.3037	1.80123	2.50108	2.28615	2.75902
2011-11-11	1.72931	0.83781	1.49436	1.53234	0.918721	0.393707	1.0288	0.897847	1.55115	2.38486	1.21562	1.01376	1.56701	0.224734	0.186982	0.452259	1.76627	1.76651	0.769183	1.17282	1.80644	0.716079	0.988863
2011-11-18	1.21633	1.29466	2.27233	2.22441	2.4995	1.26539	1.20806	1.47315	0.675321	3.82174	2.62167	0.92278	2.13604	0.287923	0.175202	0.958349	1.54953	0.839547	1.96979	0.967619	2.33965	1.14486	2.33602
2011-11-25	0.807101	0.306744	1.19103	1.93475	1.82235	0.754586	2.03819	1.32195	1.09308	1.53628	1.14694	1.44158	1.71871	0.648065	0.361878	0.762028	1.36318	1.06947	2.33729	0.608552	1.03025	0.829657	1.51643
2011-12-02	0.751302	1.67507	0.976916	1.13648	5.81115	0.881287	0.427959	0.507209	1.1845	1.76763	0.687397	1.23264	0.465815	0.456299	0.457946	0.428462	2.62585	1.03235	1.2649	1.27591	3.13562	1.22875	3.78124
2011-12-09	1.46893	1.62064	1.21635	0.333718	1.43855	0.68728	0.864719	1.06311	3.60444	1.48507	1.2067	1.29893	1.64884	0.058599	0.110475	1.04309	1.21923	1.22622	1.70884	1.17688	3.38502	0.493763	2.36085
2011-12-16	3.74472	1.31012	1.3586	2.0686	1.60033	1.05846	0.144964	1.32627	5.11285	1.29881	2.86112	1.64656	2.46821	0.245502	0.116734	1.05151	2.80665	2.72445	3.99076	1.60858	3.1477	1.46912	3.45558
2011-12-23	2.68696	1.2331	1.14691	0.398401	0.687383	0.999398	1.09963	0.454155	0.598529	1.42067	1.30012	1.45922	1.39655	0.324055	0.173269	0.958236	1.22	0.747004	1.44723	0.448034	1.11148	1.02175	1.67414
2011-12-30	1.86113	0	1.76369	1.73352	1.89507	0.939024	0	1.65799	1.25843	3.34503	1.2717	0.520334	0.894203	0.184756	0.76798	0.286592	1.70762	2.17855	3.8313	1.71131	2.69601	1.24202	2.29092
2012-01-06	3.28254	1.69175	1.0902	2.03281	2.40485	1.49077	1.29534	1.16119	3.44852	3.2442	2.07913	2.24637	1.96352	0.430407	0.364518	1.00663	2.05721	0.854676	2.24875	1.69187	3.00343	1.58994	0.687933
2012-01-13	4.53292	2.13951	3.06326	0.741102	2.90229	8.1693	1.0324	2.18478	1.5229	3.09498	1.07237	0.843483	0.921074	0.153259	0.104865	0.582001	1.88763	1.17015	1.78158	2.12085	2.94374	1.53194	1.15799
2012-01-20	1.76165	0.391269	1.53658	1.25008	1.57501	2.22355	0.631866	1.31848	0.917216	1.24758	1.48983	0.663411	1.32045	0.121896	0.154089	0.573734	1.35981	0.545005	0.481093	1.36488	2.71207	1.56955	1.70441
2012-01-27	2.90654	1.11605	0.8755	1.12318	0.535907	2.05707	0.675612	1.38434	0.707484	1.99081	0.767305	0.33781	1.08943	0.195149	0.275388	0.477815	1.33124	1.76502	2.69212	1.99897	2.01516	1.28518	1.43961
2012-02-03	3.24786	0.484348	1.46015	1.35205	1.87316	1.48589	1.99052	1.79243	1.41314	1.87137	1.08077	1.02583	1.09798	0.203636	0.241953	0.351725	1.8109	0.749842	1.87472	0.830165	0.730136	1.53722	1.73004
2012-02-10	1.35172	0.706002	3.28527	2.39684	2.51922	1.35982	0.723562	0.178642	0.912615	2.18306	1.25563	1.15994	1.0499	0.14115	0.114741	0.679017	2.04079	1.099	0.94404	1.33298	1.65373	1.50168	2.17432
2012-02-17	2.80044	1.06009	1.26628	0.293699	1.05745	0.980416	1.2494	0.790729	0.999451	2.17593	0.514817	0.631466	0.962219	0.185242	0.0653975	0.387001	0.471343	0.401863	0.550167	1.77471	1.68906	0.981168	0.614836
2012-02-24	2.32997	1.2771	1.02282	1.29745	0.579863	1.41905	0.132621	0.118377	0.332785	1.00931	1.08316	0.545976	0.577645	0.21613	0.222789	0.503685	1.28398	0.806831	1.58297	1.10365	1.23597	1.27961	1.22237
2012-03-02	1.42469	0.53984	0.923355	1.40052	1.32456	1.22858	0.770967	0.393748	1.72004	0.734698	1.49233	1.50809	2.85705	0.929124	0.335721	0.64955	1.07957	1.32303	3.26436	1.37502	1.76887	0.357331	1.56403
2012-03-09	2.13099	1.57048	2.09048	2.71257	1.47907	0.83749	1.36537	0.657761	0.966745	2.64493	1.22971	0.857331	1.66749	0.36915	0.284445	0.847264	1.69664	1.12749	2.45788	2.05027	2.89327	1.5855	1.93899
2012-03-16	2.0664	0.907611	0.909166	0.716648	2.37728	0.896713	1.55958	0.744492	1.38074	1.95721	1.16867	1.19193	1.84694	0.246267	0.233888	0.98386	1.1423	1.53986	1.51442	0.989643	1.28486	1.9516	1.39929
2012-03-23	2.16894	2.00422	1.21241	1.23502	1.1316	1.60981	1.05509	1.05503	1.04517	2.39667	1.75441	0.681693	0.776717	0.337186	0.41566	0.753127	1.40779	0.968058	2.04806	0.988012	1.97995	1.20169	1.12881
2012-03-30	1.92226	2.61509	3.83602	1.07965	0.94658	1.03422	0	1.88754	1.59413	3.46938	1.4059	0.85366	0.547872	0.160739	0.151095	1.28192	1.59823	0.99194	1.66936	1.10027	1.31167	0.699786	2.53181
2012-04-06	1.16728	0.967005	0.800666	1.53794	0.530403	0.670517	2.30517	0.628542	0.79204	1.09645	1.9195	1.49322	1.57	0.170283	0.288467	0.765176	2.02128	1.8612	3.07425	1.46324	1.33967	2.35344	2.46628
2012-04-13	1.88665	1.08776	1.03574	0.911303	1.15865	2.54027	0.967007	0.695861	1.89521	2.11723	1.25447	1.28471	1.61678	0.60157	0.0791791	1.40508	2.49153	0.666599	2.11399	0.78728	0.408656	1.35125	2.04793
2012-04-20	1.53433	1.27481	2.02112	2.98271	0.93584	1.14671	1.85557	1.40169	1.36703	1.87417	1.14711	0.520877	0.983571	0.350932	0.111078	0.664758	1.05481	0.432183	1.01046	0.939117	0.58517	0.800964	2.46612
2012-04-27	2.27733	1.54745	1.82642	1.75617	2.0878	3.31503	1.51714	0.879458	1.31706	2.23902	0.655497	0.763572	0.830106	0.115248	0.125213	1.12403	1.31305	0.674842	2.27843	1.01676	1.6416	0.946328	1.92188
2012-05-04	2.6416	2.02895	1.87756	1.14229	0.74361	2.01354	0.780697	1.07447	1.1024	2.53107	2.0901	1.12946	0.828601	0.307501	0.242083	0.471659	0.719873	0.566042	1.48396	0.519908	0.744539	0.963366	1.51956
2012-05-11	1.06189	1.03971	1.94593	2.01431	0.56571	2.67324	2.30945	2.50631	1.57325	1.21756	0.532031	0.485117	0.559414	0.195647	0.334291	0.466432	0.684776	1.05065	0.975687	0.60091	2.21673	0.447975	0.618741
2012-05-18	1.90701	0.408464	1.38391	1.92129	1.33564	2.01645	2.47364	1.72058	1.1766	2.60702	0.43612	0.79447	1.19065	0.442944	0.603994	0.492472	1.0899	1.58646	1.74761	1.26006	1.4665	1.55565	1.50454
2012-05-25	1.16398	1.49806	2.61024	3.41966	2.63983	4.06742	1.30334	1.29815	1.14941	1.08782	1.49829	0.806087	1.4086	0.884636	0.440184	0.839209	1.54898	1.74887	3.09626	0.872788	1.07042	0.676127	1.72542
2012-06-01	0.927341	0.699947	1.05202	1.39039	6.32763	0.799747	1.754	0.940408	0.536672	1.77028	1.86636	1.28904	2.38517	0.0757099	0.270237	0.754499	1.13937	1.60065	1.70325	1.01523	1.38157	0.826122	0.982134
2012-06-08	1.46723	0.237162	1.21254	4.62108	0.606565	1.8319	1.35343	1.5438	1.74094	2.15031	0.769708	1.0287	1.25748	0.585847	0.555346	0.367773	1.48383	1.55545	3.34682	2.47153	1.80368	0.425569	1.41886
2012-06-15	1.18055	0.556388	1.14911	2.48833	2.1674	1.96162	1.85221	1.03603	1.95656	1.56835	1.35971	1.43709	1.42471	0.285927	0.113921	0.549037	0.873302	0.671588	1.05429	1.16448	0.74798	1.4317	1.76462
2012-06-22	1.63557	2.53153	3.63709	4.35965	2.40691	1.69705	1.45526	1.48284	3.09277	1.52207	2.57701	1.58547	2.26769	0.244689	0.424777	0.513809	1.43265	0.772964	1.92402	0.857297	1.0331	0.769511	2.67159
2012-06-29	1.40718	2.11628	2.65638	2.91116	4.37534	3.62784	0.797725	1.63453	1.91994	2.65211	4.58784	2.94131	3.29786	0.520823	0.525612	0.969434	1.70744	1.33694	2.69093	1.2863	1.61769	1.03614	1.67276
2012-07-06	1.47022	1.76283	2.7698	0.987705	2.27436	2.81296	2.19992	2.52791	0.810865	3.26426	2.96023	1.942	1.97873	1.12174	0.205039	0.515613	1.72108	0.958936	2.11096	1.50803	1.92399	1.79969	2.48738
2012-07-13	2.82296	1.26139	3.2293	2.1732	3.08017	1.40619	0.981399	2.69215	1.49304	1.60164	1.86526	0.914411	1.34513	0.6909	0.240567	0.327719	0.963678	1.13109	0.805359	1.18345	1.10763	0.931031	2.05758
2012-07-20	0.819016	1.67357	1.61567	2.54668	1.31174	1.27332	1.90946	1.0693	0.69831	2.46398	1.61213	1.03413	1.23944	0.706681	0.459028	0.74279	1.51193	0.64308	0.549119	0.624652	0.82251	1.1838	0.491878
2012-07-27	1.44008	1.27144	2.00363	1.63915	2.9075	0.333067	3.22624	2.78321	1.82946	3.1605	2.18926	1.84245	2.53252	0.829823	0.136258	0.364036	1.17877	0.710843	1.07956	0.69311	1.24377	0.780494	1.26748
2012-08-03	0.918418	0.791106	2.00707	0.484213	2.06938	2.21463	0.826111	2.93296	1.04895	2.6115	2.76086	2.00765	1.52395	0.193816	0.170916	1.12583	1.33318	0.635844	2.05031	1.2975	1.46252	0.529478	2.43552
2012-08-10	0.891092	1.17739	1.58847	1.84694	1.38245	1.88811	3.19765	2.46248	0.589717	1.86312	0.856393	1.03433	1.34632	0.414071	0.267543	0.553975	0.772042	0.340066	0.384064	0.800102	0.996826	1.33632	1.00992
2012-08-17	1.70714	0.704211	1.3557	2.17383	2.22637	2.51628	2.00929	1.67456	0.738035	2.46826	0.604766	0.89281	1.81243	0.367709	0.121381	0.630915	1.03666	0.621553	0.836635	1.71705	1.09885	0.881986	0.971195
2012-08-24	1.65839	0.921457	2.00758	1.62163	1.68719	3.43792	1.65801	1.6397	1.68821	1.89614	0.61938	0.534309	1.11795	0.307173	0.182501	0.293109	1.30464	0.9221	1.8276	1.14096	0.863305	0.684438	1.24866
2012-08-31	1.82741	1.21673	1.44874	1.4432	1.96526	2.16501	1.16929	0.70978	1.49305	2.23935	1.2197	0.623767	2.89505	0.196837	0.314458	0.586826	0.445754	0.7276	2.32442	0.49205	0.736949	1.13362	0.996054
2012-09-07	1.87104	1.49448	1.13671	1.14015	1.10795	1.18455	1.57922	0.464753	1.47485	1.31903	0.739001	0.728688	3.49388	0.334167	0.925206	0.467551	1.61804	0.79498	1.27868	0.422451	0.428227	1.14926	1.7015
2012-09-14	0.797979	1.55903	1.24194	0.95372	0.740141	1.83384	1.85412	1.5049	0.643826	1.63394	0.521509	0.466419	2.9353	0.357899	0.635467	0.366125	1.60644	1.07674	2.35828	1.01044	0.919625	2.66416	2.66784
2012-09-21	1.0748	1.65936	2.46464	2.19127	1.87552	1.07553	1.62204	2.72056	1.89638	3.6691	1.72193	2.09122	2.508	0.138982	0.713876	0.49814	0.67738	0.388861	0.323835	1.38032	1.26468	2.33606	1.81744
2012-09-28	1.67119	1.63065	3.10178	1.4257	1.33252	2.62825	1.97806	1.60166	1.31079	3.72499	1.40464	1.15937	3.73321	0.285117	0.344414	0.828259	1.29035	1.15376	1.68663	1.68272	3.08555	1.45137	1.78674
2012-10-05	1.67488	2.6658	0.521075	0.92891	1.60327	1.19398	1.86936	1.59671	3.08507	1.12179	2.96349	2.10879	5.30289	0.19565	0.231602	0.567371	0.56886	0.386853	0.382944	0.330291	0.826683	1.51154	1.49133
2012-10-12	1.0903	0.75648	2.98412	0.537583	1.50571	1.38906	0.565589	1.45743	1.63748	2.71507	1.80297	1.07506	1.81528	0.174074	0.235501	0.702385	1.02035	0.490502	1.05833	1.13775	1.38799	0.554199	1.47207
2012-10-19	1.61893	1.18191	1.47679	2.37091	0.949145	1.92623	1.29648	1.66629	1.58438	0.929236	1.01069	0.889588	0.528134	0.203068	0.0694782	0.653832	1.38865	0.864028	1.81564	1.16893	1.24715	1.83159	1.44195
2012-10-26	1.77016	1.281	0.611225	1.53913	1.2392	1.05265	1.137	0.625273	0.809061	1.36831	1.11813	1.23945	1.43944	0.146713	0.189139	0.595691	0.668679	0.532679	1.22591	0.814635	1.8256	0.731213	0.935223
2012-11-02	1.04402	1.28349	1.55632	1.05335	1.11198	1.4697	0.618284	1.87941	0.584452	0.35782	1.37164	1.3242	2.2098	0.174007	0.250794	0.298049	1.32878	1.083	1.82908	1.31728	1.60676	0.960079	1.18039
2012-11-09	1.6218	1.19944	0.449191	0.521849	1.99928	1.74261	1.28369	1.2998	1.75062	1.66053	3.02408	2.16112	3.73838	0.257794	0.15978	0.439772	0.787456	0.295942	1.11188	0.785618	1.81037	0.662729	1.05212
2012-11-16	2.17331	1.8734	1.52898	1.20615	1.80703	1.72604	1.84077	1.62572	0.939005	1.37214	1.04973	1.3212	0.69737	0.189495	0.304877	0.261124	0.618507	0.212732	1.00311	1.00134	2.45985	1.26857	0.934321
2012-11-23	0.644684	1.82357	0.792766	0.958805	1.26898	1.53616	0.171019	0.739541	2.04121	0.197735	2.05204	1.48708	1.29207	0.306778	0.424525	0.466976	1.41092	0.624809	0.84985	0.551093	1.59616	1.63426	1.46413
2012-11-30	1.06381	1.76002	1.23197	1.29734	1.2037	1.33844	0.864361	0.923128	0.512581	2.11598	1.07715	0.703317	1.36262	0.600731	0.568498	0.514073	0.919959	0.999057	2.01233	1.60404	2.70048	3.04359	2.04165
2012-12-07	1.5201	1.18708	1.22977	0.847725	1.17821	0.735065	1.07501	1.01371	1.35678	1.64561	0.926229	0.597175	1.17588	0.335785	0.218343	0.295666	0.593229	0.7104	1.22902	0.78915	0.885438	0.787144	0.959965
2012-12-14	1.42897	1.47642	0.844829	1.02781	0.659538	1.29434	0.159204	0.534561	1.8522	1.49007	0.967783	1.19496	1.50416	0.219726	0.863038	0.725812	0.735047	0.573026	1.34279	1.2556	1.72739	0.466194	1.4672
2012-12-21	0.357833	0.884898	1.15418	0.496634	1.9357	2.08258	2.13563	1.65016	1.04485	0.814018	1.32867	1.0239	0.683378	0.269776	0.537082	0.547528	1.07538	0.992875	2.33018	1.12938	0.686478	0.484813	1.05755
2012-12-28	0.530936	0.690653	0.613676	0.816865	1.25988	1.70539	0.361599	0.288527	1.11152	1.30041	1.21791	0.753091	1.27139	0.179931	0.292753	0.098689	0.684888	0.233438	1.06412	0.296989	1.58206	1.18429	0.184438
2013-01-04	0.642141	1.92246	0.365467	0.810623	1.67927	3.59894	2.48754	0.675741	1.45106	1.90297	0.754393	0.494583	0.499376	0.70115	0.138853	0.652116	1.75367	1.31366	2.54212	1.29119	1.1553	2.17168	2.02037
2013-01-11	1.56109	0.999646	0.430496	0.721636	1.45291	1.52979	1.64893	0.876779	0.739648	0.826585	0.398314	1.02351	1.12138	0.243822	0.172805	0.126243	0.483395	0.727883	1.49473	0.90564	1.93005	0.830379	1.02624
2013-01-18	0.977738	0.571047	1.06357	1.1165	1.10304	1.50387	1.91329	1.54821	0.437179	1.05647	0.947557	1.40832	1.12539	0.209172	0.190669	0.657176	0.813901	0.397219	0.78861	1.25189	0.884629	1.87721	1.34946
2013-01-25	0.639438	1.88671	0.807175	1.38429	0.623389	1.09002	0	0.896357	1.00904	0.957721	0.612897	0.490189	0.648217	0.722705	0.413356	0.743938	0.647748	0.438766	1.23757	0.823258	0.801228	1.22513	0.759397
2013-02-01	0.872597	0.49801	0.837243	1.78356	0.530311	1.81291	1.24729	0.79754	1.32316	1.37129	0.838879	0.779339	1.21955	0.361555	0.302194	0.860827	0.962749	0.796114	2.08165	0.822147	1.93999	0.848835	1.09204
2013-02-08	1.14324	0.812639	0.626894	0.715158	1.27123	1.23667	0.760137	1.13967	0.867848	0.516667	0.655156	0.798547	1.23645	0.369738	0.184667	0.279251	0.6909	0.457133	0.220786	0.95666	1.43715	0.805645	1.13687
2013-02-15	1.08377	0.445465	1.37242	1.39397	0.894606	2.31873	0	1.00068	1.63229	1.22695	1.03496	0.169837	1.37081	0.215828	0.374727	0.831519	0.608886	0.833874	0.947917	1.48742	1.5846	1.31422	0.83629
2013-02-22	0.658799	1.21233	0.870256	0.995837	1.14267	2.23855	0	1.78752	0.894599	1.45174	1.36821	0.689242	1.50026	0.326065	0.567771	0.589097	0.182937	0.632614	1.18107	1.62535	2.29492	1.37557	2.14762
2013-03-01	1.20843	0.280556	0.501358	1.94976	1.39738	2.72499	1.46704	0.651015	1.27089	1.71231	0.654314	0.419736	4.82695	0.59692	0.251209	0.703856	0.803583	1.0134	1.51893	0.763851	1.96312	0.632634	0.794118
2013-03-08	1.33539	2.08533	1.70426	0.67684	0.957174	2.7335	0.450369	0.45727	1.12805	1.9712	0.795004	0.995722	4.14194	0.438969	0.534608	0.580882	0.807588	0.290244	0.536825	0.416204	0.771492	1.2614	1.03357
2013-03-15	0.755406	0.544919	0.681345	1.12224	0.702545	1.2012	2.45935	0.650141	0.350867	0.75723	0.257257	0.561632	1.19488	0.259209	0.266484	0.735004	0.640672	0.406994	0.85691	0.670271	0.751619	0.527405	1.40633
2013-03-22	1.16953	0.844186	1.03582	1.66053	0.969562	1.76202	2.13372	1.21426	1.23317	1.54808	1.03699	1.2537	1.21809	0.195215	0.052997	0.586776	1.44806	0.54649	1.22607	0.778845	1.41612	0.507506	1.4263
2013-03-29	0.944217	0.59064	2.63174	1.15877	0	0.986217	0.482436	1.6478	0.551362	3.86252	0.587035	0.46314	0.84632	0.664655	0.393169	0.51221	0.394994	0.344376	0.478738	0.475141	0.727166	0.37342	0.7358
2013-04-05	0.520041	1.08787	3.25713	1.17916	2.25812	2.12044	0	0.525742	0.430582	2.6278	1.07935	4.03822	1.87044	0.892235	0.471477	0.134912	0.745617	0.895646	1.30112	1.28359	1.70059	0.816895	0.840117
2013-04-12	0.931642	0.837207	0.671198	4.03707	0.468586	1.39915	0	0.629112	0.501921	1.71376	1.41786	1.76972	2.14387	0.332457	0.577006	0.351103	1.89664	1.96637	2.82567	0.680299	1.73228	0.525352	1.64715
2013-04-19	0.75214	0.962009	1.96641	1.92273	0	1.82469	0.0971148	1.2294	1.41497	1.6258	1.77314	1.99645	1.9254	0.433708	0.390356	0.765535	1.91665	4.98756	5.44044	1.8265	2.73701	1.8812	1.33538
2013-04-26	0.914127	1.38205	0.88575	1.22711	2.41458	1.8868	1.81006	1.19753	0.747536	1.29464	1.24746	1.44158	1.67239	0.946103	0.210934	0.415711	1.97812	1.20476	2.43665	1.279	1.16073	1.05023	1.18205
2013-05-03	1.25898	1.07201	2.83427	2.85904	3.29232	2.06037	0.556705	1.75323	0.689334	1.94833	2.34623	2.26494	2.38558	0.379134	0.551526	0.554094	3.67963	1.05411	2.58414	1.25143	1.28898	0.892076	2.84781
2013-05-10	0.912019	1.46957	2.384	0.460965	0.946314	1.97947	1.69135	1.16962	0.947071	2.37929	0.646827	0.874451	1.21795	0.300136	0.70958	0.620765	1.1071	1.65198	1.22589	0.92481	1.19009	0.601255	0.809032
2013-05-17	1.21904	1.00895	1.69561	0.992621	0.816275	1.66065	1.94625	0.741131	0.541937	0.920043	0.9584	0.721522	0.732896	0.297691	0.247663	0.544976	1.35378	1.4771	1.88897	0.710191	0.67297	0.946334	0.528752
2013-05-24	1.27754	0.733827	1.69652	1.11068	2.92247	1.04705	2.96493	1.14725	0.717644	1.33717	0.868411	1.17606	1.1331	1.13116	0.156422	0.692886	1.53357	0.407431	0.828009	1.20974	1.2539	0.316188	1.37081
2013-05-31	0.873429	1.01046	1.26047	0.388727	0.805215	1.43333	0	1.16432	0.307938	0.842981	1.21066	1.73537	1.49808	0.438638	0.159332	0.655156	0.572024	1.34261	1.99145	0.424035	1.19392	0.422882	0.324408
2013-06-07	1.1126	0.984896	0.641983	1.78244	1.2759	1.26919	0.767286	0.356253	0.344453	0.559317	0.724248	1.26881	0.553382	0.764166	0.28182	0.322671	1.32446	1.21796	2.38402	1.00696	0.78387	0.599444	1.32256
2013-06-14	1.50773	1.27015	1.72955	0.91043	1.40582	1.40973	2.04116	1.2414	1.54959	1.14717	0.665456	1.90058	1.21723	0.539501	0.277795	0.446864	0.99262	0.694079	1.54242	0.486505	1.17929	0.914523	1.67556
2013-06-21	0.968666	1.86668	1.67125	2.11391	1.34984	0.601389	0.295842	0.959284	2.18111	1.90106	1.60087	1.39259	1.49674	0.0879873	0.475853	0.637251	1.28125	2.53422	3.8265	1.50225	2.23724	1.15035	2.27351
2013-06-28	0.651459	1.10651	0.91934	1.67794	0.635092	2.572	2.30177	0.425724	1.34919	1.42232	0.921476	0.772819	0.679647	0.120648	0.137325	0.316609	1.50412	1.18987	3.04036	0.538244	1.3756	0.532352	2.40202
2013-07-05	1.44388	1.51387	3.15952	0.689225	4.04047	0.646476	0.49491	0.305865	0.973221	1.02467	0.851738	1.10649	0.869391	0.436181	0.0760509	0.388191	2.33573	1.94831	2.82302	1.94214	2.73333	1.03711	2.14416
2013-07-12	1.47811	1.37347	2.12276	1.30154	0.967452	1.35726	2.65578	1.8573	0.443953	0.687132	1.59289	0.721971	1.20992	0.544318	0.159323	0.198596	1.57952	0.789308	1.51534	0.973694	1.91997	0.582784	1.21888
2013-07-19	0.916541	1.95391	0.887394	0.833881	0.533346	1.37178	0.844468	0.863249	0.632373	0.903194	0.655248	1.0422	0.616826	0.661067	0.137574	0.624793	1.09802	0.532545	1.6249	0.738781	0.634501	0.950299	1.54852
2013-07-26	0.425527	1.54843	2.02026	0.876198	1.25368	2.16015	0	3.266	0.89291	0.412396	0.885785	0.578771	1.4602	0.278274	0.111465	0.778363	1.35343	1.27976	2.89209	1.27819	1.44929	0.550192	1.55131
2013-08-02	1.04606	1.28778	1.62386	0.770872	1.21944	1.35075	3.30234	0.723564	1.08651	0.849831	1.77678	1.19414	0.926602	0.489839	0.25523	0.476793	1.66309	0.76459	1.30289	0.370932	0.61945	0.509576	1.56032
2013-08-09	1.53966	1.19965	0.960582	1.51138	1.71753	1.4067	1.61782	1.19551	0.96027	1.11503	1.51292	1.10857	1.1884	0.145322	0.193917	0.725128	1.19331	1.16425	1.75046	1.53723	1.61225	0.600598	1.77795
2013-08-16	1.09536	1.47487	2.36225	0.923009	1.03557	1.32475	1.39837	1.62327	0.756267	2.05801	0.220908	0.269686	0.971373	0.29284	0.151521	0.345586	0.624344	1.67747	2.03919	0.891549	1.06064	0.513825	1.11912
2013-08-23	1.27455	0.746508	2.38853	3.226	1.75666	2.08859	1.54631	2.12729	1.20971	1.01655	1.44493	0.815545	0.837544	0.746213	0.23954	0.27394	1.06545	0.684183	1.44813	0.629966	0.712767	0.649446	1.15876
2013-08-30	1.20506	0.788627	1.33049	1.01703	1.7656	1.03693	2.96854	2.11733	0.574891	1.61264	1.76335	1.59479	4.3919	0.283403	0.165068	0.436644	0.71114	0.919021	1.83679	0.685796	0.728397	0.728566	0.808402
2013-09-06	1.72825	0.642792	1.62572	0.424623	1.24014	1.64326	2.0056	1.47237	0.66626	1.17592	1.21186	0.616835	0.743489	0.223229	0.418449	0.555862	1.33833	1.12637	3.00058	1.223	1.84304	0.702478	0.928251
2013-09-13	0.401856	1.14684	3.84406	0.548725	1.51902	1.95566	2.39194	2.4216	0.588102	0.935123	1.11431	1.51921	1.49768	0.331233	0.172285	0.257434	0.738711	1.10567	1.82227	1.02939	1.3282	0.32891	0.814419
2013-09-20	0.899359	1.33884	1.38055	0.875342	1.6824	2.4654	1.19589	1.81588	0.987634	1.99636	1.90013	1.76457	2.20985	0.10883	0.172742	0.448456	1.1685	3.01192	4.8844	1.94843	1.67723	0.878458	2.11801
2013-09-27	1.00827	1.4158	0.722224	0.352086	1.97927	1.55985	0.646569	0.447471	1.63236	0.47494	0.522507	1.17935	1.65502	0.315271	0.411239	0.47931	1.00904	1.16147	0.961976	0.718505	1.18695	0.483581	1.00609
2013-10-04	1.06782	0.656666	1.57301	1.04122	0.400628	1.63695	2.13951	1.18613	1.17353	0.399301	1.1271	1.21734	1.01667	0.0945756	0.288728	0.213265	1.28346	1.86601	3.47683	1.4266	0.604783	0.586769	2.20331
2013-10-11	1.3184	0.519976	0	0	0	0.863965	0.480286	0	0.49447	0	1.2735	1.22451	1.34373	0	0	0.325727	1.10609	1.48487	2.60501	1.20318	1.37746	0.339534	1.16193
2013-10-18	1.42646	0.516149	0.520097	2.08577	1.61287	1.60765	2.45221	0.292703	1.45936	1.90137	1.15589	1.32477	1.61587	0	0	0.862484	0.464013	1.78151	1.55761	0.948691	1.3374	0.474121	0.849687
2013-10-25	1.38905	0.730544	1.6442	1.04413	0.614475	1.52722	0.550934	0.668899	0.687545	0.459601	1.01364	1.14999	1.42194	1.33444	2.98124	0.452537	1.28303	1.01625	1.54486	0.487762	1.27025	0.528455	1.96623
2013-11-01	0.667239	0.791898	0.321493	0.264513	1.75902	1.81421	0.798691	1.2353	0.841736	1.00312	1.24532	1.37742	1.50099	0.128618	0.362432	0.393091	0.654657	1.23371	2.59677	1.24674	0.90691	0.529739	0.694768
2013-11-08	1.72236	1.15968	1.23861	1.26335	1.28953	2.89413	2.20397	1.11651	0.4587	0.331076	0.997817	0.703997	1.41743	0.285338	0.136043	0.251264	0.821697	1.06167	0.829899	0.671577	0.847475	0.293452	0.596034
2013-11-15	1.8832	1.99936	1.01359	1.15757	0.938744	1.22107	1.82687	1.32186	0.188378	1.3216	1.17606	1.05448	1.33379	0.10021	0.374739	0.125571	0.903203	0.651156	1.10785	0.871731	0.431032	0.266956	0.996815
2013-11-22	0.761663	1.57203	1.75596	0.627129	1.19287	0.831211	2.05707	1.24679	0.613434	0.538761	1.22092	1.15774	1.32539	0.202445	0.163122	0.782836	0.607188	0.735702	0.999078	0.588327	0.733466	0.579252	1.04811
2013-11-29	0.577295	0.776701	0.605554	1.23335	1.30442	0.192958	2.11493	0.485222	0.0865987	0.554694	0.75585	0.442081	0.869688	0.33374	0.465438	0.348486	0.503047	0.433706	0.478082	1.07679	0.847166	0.797277	0.938684
2013-12-06	1.14163	1.12887	0.885451	0.845282	2.52483	1.33721	1.10467	0.438265	0.37768	0.809173	0.859506	0.444194	0.916245	0.558881	0.216432	0.320367	1.23285	1.04961	1.41826	0.96671	1.28242	0.708891	0.758894
2013-12-13	1.10265	1.88796	1.34148	1.04374	1.2378	1.28853	0.853111	0.923447	0.638115	0.783465	0.941116	0.821211	1.16439	0.29565	0.138191	0.491233	0.26238	1.52444	2.83285	1.00206	0.863187	0.154625	0.663859
2013-12-20	0.493074	0.860143	0.640863	0.378916	3.11121	1.48692	1.50452	0.937024	1.44688	0.995683	0.450931	0.982669	0.891769	0.275263	0.07376	0.628722	0.666627	1.53692	2.36761	1.16991	0.465209	0.186708	0.761222
2013-12-27	0.0843631	0	1.51112	0.848997	0.474494	2.18894	0	0.856014	0.760971	0.487867	0.461348	0.486498	0.712479	0.306242	0.394946	0.357759	0.583239	0.472365	0.878837	1.36098	0.6973	1.02	0.564163
2014-01-03	2.31721	2.16447	0.794914	0.948293	0.592071	1.39462	0.245948	0.781311	0.57915	1.38309	1.1733	1.03213	1.34621	0.482262	0.12922	0.286328	0.51936	0.865536	1.90006	1.32595	0.446088	0.299097	0.930521
2014-01-10	0.899412	2.05301	2.73853	1.27483	2.3943	2.04458	3.37263	0.322674	1.03867	1.00024	0.990665	0.684976	0.826966	0.215101	0.149708	0.276547	1.05269	1.0278	2.22293	0.55174	0.378648	0.840641	2.24675
2014-01-17	1.1911	0.940532	0.989813	0.855666	1.48947	1.36091	1.61302	0.578069	1.1657	1.67614	1.04882	0.905505	1.34545	0.123694	0.330172	0.428188	0.793543	0.631172	0.730782	1.05765	0.648925	0.97425	0.898212
2014-01-24	1.60545	0.647391	0.712978	0.835032	1.15693	0.687519	1.28971	1.39404	0.485019	0.398351	0.95205	1.04277	0.870774	0.216554	0.260832	0.717005	0.766399	0.98833	1.29694	1.3453	0.507006	0.332473	1.05913
2014-01-31	1.60037	1.29824	0.808706	1.76308	2.38363	1.65855	1.14568	0.860535	2.30625	1.42824	1.1158	1.21388	1.09576	0.281394	0.085419	0.203485	0.153277	1.03795	1.16	0.847095	0.591058	0.85332	1.35763
2014-02-07	0.824241	3.53466	1.10016	0.719248	1.88121	0.731956	1.12458	0.842899	1.50087	1.94366	1.19299	2.12089	1.29346	0.126594	0.249418	0.827724	0.620183	1.05001	1.00066	0.572038	1.24728	0.753073	1.06933
2014-02-14	0.563019	0.72153	0.258285	1.03724	2.38387	0.751118	1.3105	1.10385	1.3379	0.896721	0.230683	1.38089	0.945237	0.382353	0.139376	0.512261	0.892299	0.528165	1.62631	1.22917	0.917935	0.578552	1.34253
2014-02-21	0.811028	4.02788	1.31407	0.881555	1.03891	1.30244	0.27743	0.810835	1.22614	1.24706	1.13595	1.54784	1.04842	0.149502	0.4838	0.383202	0.331509	0.54574	1.33488	0.548932	0.351018	1.03473	0.746075
2014-02-28	0.681438	1.35425	1.54423	1.75769	1.75662	0.168218	1.73853	0.992746	2.43854	1.96624	0.681896	0.897179	1.05067	0.186426	0.121783	0.812329	0.42636	1.01013	1.90271	0.426154	0.811081	0.357226	1.16186
2014-03-07	0.867837	3.59637	1.45328	1.76078	3.84475	1.71593	0.635628	0.593764	2.21689	1.49941	1.77323	1.77942	1.39336	0.138872	0.263445	0.695901	1.82312	1.30567	1.88875	1.12432	1.71328	1.54179	1.46476
2014-03-14	1.16611	2.06457	1.10476	0.506194	4.07859	0.993526	1.05731	1.22146	1.61411	2.57354	1.1412	1.11688	0.597789	0.205273	0.170662	0.500373	1.55409	0.686113	1.10718	0.431585	0.574166	0.371085	0.486716
2014-03-21	0.975684	1.74468	1.34325	0.691938	3.55121	0.841081	1.76058	1.34193	1.08154	2.43735	1.10039	1.04424	1.58529	0.149225	0.122229	0.564105	1.19495	0.661882	1.07997	0.72541	2.58949	0.306736	1.99594
2014-03-28	0.643484	1.2091	1.22818	2.96932	2.52223	1.14833	1.95385	0.5701	1.12305	2.16756	0.518567	0.759651	1.215	0.592828	0.430359	0.371604	1.42392	0.671099	0.680639	0.552869	1.09746	0.328822	0.987782
2014-04-04	0.96409	2.44322	1.87018	0.895075	1.58935	2.01887	2.01818	1.35008	1.64257	1.3123	1.08201	1.22827	1.46425	0.285786	0.330874	0.875256	0.366446	0.847953	0.987535	0.410525	0.523724	0.482413	0.258867
2014-04-11	0.760563	1.97245	1.03929	2.06399	3.03281	1.10191	0.276149	1.02513	1.27975	1.1931	1.09355	0.858151	1.97389	0.167237	0.182074	0.589888	0.547331	0.650897	1.52757	0.750818	1.19918	1.15646	0.950439
2014-04-18	0.706366	3.13041	0.772537	1.27004	0.886691	0.909432	0.934432	0.90376	1.27141	1.6708	0.359747	0.586541	0.570269	0.633684	0.439405	0.2164	1.11392	1.04202	1.11983	1.15372	1.88808	1.62728	1.12741
2014-04-25	0.548969	2.3583	0.886804	0.693332	1.80356	0.950295	0.399157	1.57382	1.24556	1.40309	1.29375	0.95431	0.86604	0.689296	0.552645	0.73282	0.53703	0.729162	0.851502	1.45974	1.43229	1.05632	0.951099
2014-05-02	0.818544	1.68791	1.48555	1.18217	2.07117	1.51467	1.2018	1.7868	2.30996	1.5426	0.811169	0.835122	1.65482	0.30275	0.16345	0.528871	0.859941	0.99018	1.60712	0.72113	1.13953	0.433437	0.864145
2014-05-09	0.53527	2.46298	1.54828	3.41062	2.12579	1.04099	1.32389	0.999751	0.722064	1.36401	0.70584	0.938468	1.26129	0.279085	0.286768	0.197207	0.829103	0.570714	0.704034	0.965379	0.422882	1.06607	1.59142
2014-05-16	0.461433	3.59855	1.26206	0.398411	1.06051	1.74209	1.17473	0.971633	1.64343	1.18559	0.742645	0.681202	0.691716	0.244363	0.215097	0.597776	1.1176	0.605278	1.74051	0.748303	0.722343	0.342052	4.71981
2014-05-23	0.227696	0.744872	0.736369	0.684546	1.78555	0.61842	0.746064	1.33318	0.191977	0.51068	0.729868	0.279682	0.553735	0.585468	0.234031	0.961765	0.904136	0.411277	0.38254	1.02282	0.9287	0.910916	2.93677
2014-05-30	0.355401	1.92173	0.885814	1.35256	2.02399	1.16183	0.731232	0.8436	1.35048	0.631828	0.840709	0.467141	1.34016	0.643307	0.109522	0.944158	0.588809	0.821298	0.819681	0.892606	0.707866	0.327536	1.50117
2014-06-06	0.378817	1.00725	1.39	0.910552	1.89326	0.637681	0.663079	0.988949	0.731169	1.69296	0.226115	0.682564	0.537506	0.475442	0.193737	0.338399	1.15412	0.390401	0.661039	1.25643	0.342613	1.12512	0.75527
2014-06-13	1.03243	2.26179	1.01239	1.35762	6.75881	1.09548	1.07182	1.03784	1.0746	0.780849	0.996905	1.31506	1.39744	0.337135	0.410489	0.790812	0.84352	0.312148	0.426541	1.82835	1.70838	0.382639	1.23522
2014-06-20	0.301777	1.68343	1.21797	2.63438	1.20699	0.806306	1.0657	0.916435	1.13519	1.01708	0.537458	0.305529	0.165184	0.597508	0.22445	1.21513	0.648968	1.07501	1.49459	0.976191	1.03235	0.362672	2.30479
2014-06-27	1.40099	1.95758	0.886557	1.48992	1.0898	2.03938	2.00285	0.805341	1.23091	1.19983	0.533712	0.52226	0.785276	0.535684	0.201964	0.482928	0.51355	0.274504	0.41457	0.745939	1.12788	0.323429	1.48363
2014-07-04	0.280842	0.637625	2.17327	0.558364	0.901276	0.766544	1.37841	1.30096	2.21753	1.78502	0.343081	0.510772	0.540018	0.525378	0.403964	1.21552	0.709312	0.618412	0.668919	0.710382	0.454293	0.169861	1.83884
2014-07-11	0.633866	2.08574	0.825578	1.35929	3.83792	0.755418	2.23979	0.888745	0.818745	1.96756	1.02835	0.879009	1.17336	0.460063	0.116295	1.2416	0.362064	0.619412	1.03447	0.380125	0.470012	0.221957	1.53236
2014-07-18	0.702745	1.46151	1.59894	0.335649	1.41601	0.371452	1.39937	0.895468	0.482969	2.68337	1.19189	0.801909	0.774607	0.88386	0.175972	0.413099	0.515825	1.02388	1.80788	0.940093	1.04613	0.215325	1.18313
2014-07-25	0.54508	1.66378	1.32585	1.59286	0.957139	0.864864	1.42313	0.377851	0.961097	2.8293	1.53883	0.782093	0.872176	1.05028	0.128726	0.408129	0.961689	0.79439	1.21915	0.534029	0.857925	0.289473	0.650822
2014-08-01	0.516139	2.32408	1.4553	1.09728	3.52668	1.59427	0.194019	1.76798	0.666198	2.05566	2.57404	0.544712	1.11527	1.49137	0.155967	1.30831	0.550049	0.565751	0.330072	0.619764	0.763756	0.509773	1.61317
2014-08-08	0.328397	1.3005	1.74161	1.3617	1.65325	0.966274	0	1.07449	0.885817	2.6641	0.606482	1.07909	1.15872	0.327578	0.1454	1.16865	0.819851	0.928193	1.14512	0.558932	1.47023	0.266366	1.35597
2014-08-15	0.278318	2.28382	0.672566	1.36699	0.822576	0.986195	0	1.11783	0.466306	1.97089	1.46436	1.73047	1.37272	0.266012	0.167168	0.725947	0.771159	0.467375	0.714702	0.641052	1.05974	0.32339	0.690234
2014-08-22	0.858194	1.37368	1.31603	1.27433	1.2188	0.306189	0	0.769798	1.54663	0.904622	1.86312	0.681308	1.32437	0.241702	0.183117	1.2065	0.986763	0.545204	0.73954	0.446125	2.04126	0.569889	1.23363
2014-08-29	0.506218	1.46191	1.73312	1.04232	1.365	2.72004	0	6.66213	1.22204	1.58871	0.762566	0.600912	1.10024	0.254902	0.268867	0.760592	0.757671	0.355446	0.619318	0.393237	0.566372	0.640028	0.890371
2014-09-05	0.41446	2.40044	1.28872	1.08855	0	0.455681	1.33956	2.20686	1.21032	1.89182	2.85089	1.93637	1.07599	0.469766	0.572193	0.47904	0.619003	0.80344	0.924015	0.309909	1.7808	0.20364	1.52691
2014-09-12	0.829607	1.76932	0.854255	1.33752	0	0.50274	0.701819	1.10046	0.989957	0.769414	0.960298	0.3539	0.531642	0.121474	0.352121	0.569528	1.0181	0.428398	3.50722	0.477039	1.44799	0.538764	2.55911
2014-09-19	0.879317	1.06639	1.1388	1.64265	0	0.793783	1.11908	2.8583	1.69723	2.71204	1.41013	0.808218	0.554539	0.438342	0.203752	0.826563	0.869938	0.519138	1.64769	0.809825	1.44358	0.897023	0.846407
2014-09-26	1.58819	2.30276	1.539	1.29229	1.83199	1.57917	0.733194	4.54997	1.21991	5.4816	1.42464	0.504753	1.49258	0.204272	0.201392	0.497166	0.78491	0.444191	0.310909	0.762139	1.37922	0.426307	2.31899
2014-10-03	1.48966	1.27134	0.90293	0.844519	0.678184	1.07168	0.46902	1.37079	1.42418	6.47259	1.4745	1.01046	2.60776	0.4956	0.146818	0.413764	0.79298	0.798017	1.89224	0.925871	1.14584	0.891841	2.19148
2014-10-10	1.3129	2.78539	2.5177	1.56709	2.29448	1.36532	0.788541	2.32828	1.53705	6.43411	1.17259	1.6563	1.76782	0.0481362	0.261042	1.31544	1.05344	0.532719	0.682795	1.9008	2.53838	0.881197	1.79913
2014-10-17	1.75238	1.19735	3.40335	0.330946	0.497949	1.88673	1.56457	2.22501	1.0359	1.07028	2.29395	1.52052	1.75598	0.61157	0.119682	1.03882	1.75835	0.542815	0.71986	1.09574	2.89445	0.170329	1.95358
2014-10-24	0.843896	1.86881	1.73718	0.593342	1.32059	0.637969	2.13745	1.75312	1.19688	1.40523	2.35374	1.9597	2.45994	0.334603	0.318775	0.871072	1.11603	0.97675	1.28049	0.876864	0.855422	0	0.709635
2014-10-31	1.15481	0.711963	1.23094	1.11383	2.10573	0.949738	4.03764	2.10625	1.29304	1.2641	0.946819	0.96165	1.49484	0.339467	0.153928	0.285366	0.924891	1.27222	2.44559	1.2472	1.02685	0.520715	2.4006
2014-11-07	0.702679	0.558969	2.03129	1.15593	2.14091	1.10366	3.01767	1.5559	0.863603	3.78347	1.90172	1.94534	1.77727	0.09952	0.545335	0.396769	0.673358	1.33041	1.91978	1.26038	2.50037	1.54711	1.56445
2014-11-14	1.22931	1.04943	1.40248	1.92581	1.41555	2.33897	2.43239	1.73334	1.79388	1.05831	2.38895	1.67954	0.721357	0.301197	0.176483	0.556908	0.671069	0.661358	0.636809	1.22366	1.29372	0.227961	1.32371
2014-11-21	0.41835	2.22413	1.85819	0.409922	1.51554	0.821184	1.33111	1.6581	0.793355	1.73591	1.17719	1.18408	0.856955	0.232422	0.348603	0.293698	0.774473	1.05247	0.951421	1.11771	1.58642	0.465423	1.44462
2014-11-28	1.35727	1.49451	1.27507	0.578425	2.73684	1.01243	4.05914	0.696582	0.954274	1.60684	4.63439	3.90384	2.47002	0.298436	0.0911142	0.713591	1.16944	0.419188	2.95689	0.693221	0.291383	0.514713	0.514748
2014-12-05	1.06085	0.873386	1.25847	0.968395	1.05452	1.08978	2.77026	2.3162	0.937952	2.7066	2.80284	2.22843	2.17288	0.64782	0.22453	1.13251	1.18154	0.986796	2.60802	0.757768	0.691536	0.487009	1.86371
2014-12-12	1.39812	0.792666	0.998711	1.23876	1.43875	0.401337	0	1.06696	1.15658	1.42438	2.29286	1.7446	1.98337	0.399766	0.183761	0.710904	0.942958	1.57061	2.43566	0.70021	0.46836	1.22124	1.47038
2014-12-19	0.577678	1.29989	0.801996	1.07528	0.133902	1.184	0.951914	0.954678	1.21687	2.96367	3.58743	2.12992	2.28076	0.64062	0.189072	1.8051	1.10778	0.71413	2.87783	0.875222	1.07898	0.677585	1.26588
2014-12-26	0.0622944	0.723492	1.31472	0.73646	0.62149	1.62848	0.701773	1.01504	0.250053	1.98527	2.26385	8.43102	2.77019	0.993623	0.643044	0.395719	0.311968	1.0067	1.97867	0.438676	0.823877	1.0672	0.657227
2015-01-02	0.590466	1.16072	1.05804	1.3095	0.961145	1.37422	1.50591	0.803319	1.01608	1.4651	1.33035	2.6185	1.56563	2.51531	0.565511	1.2991	0.472658	1.38965	2.45345	1.42838	1.12009	1.33201	1.23573
2015-01-09	1.23251	1.40445	2.0881	1.11431	0.961502	1.83227	1.99603	1.71271	1.69874	1.49541	2.86987	0.937524	2.05375	1.91748	0.0634629	1.34735	0.733466	0.404068	1.95155	0.333534	0.498915	1.08723	1.61649
2015-01-16	0.805285	1.66165	2.46053	1.36524	1.36659	0.768444	2.37445	1.55981	1.26658	1.13233	4.82818	2.38326	4.51237	0.45553	0.311581	1.03536	2.90242	0.751503	2.32825	0.54926	2.1775	1.18304	2.21752
2015-01-23	0.869799	1.44231	1.04591	0.969662	0.966183	0.271809	0.567153	0.446838	2.34782	0.573133	2.60679	0.889916	1.813	0.857179	0.50749	1.74931	1.59525	0.831552	0.809024	0.752436	1.22815	1.50813	2.38386
2015-01-30	0.62425	2.13468	0.87371	1.16527	0.67857	2.87524	1.52875	0.772225	1.25074	1.25172	4.46022	2.82365	3.35867	0.487419	0.162165	1.51806	2.23005	1.20512	3.15515	0.931565	1.01632	1.95882	1.47285
2015-02-06	0.739769	1.06878	1.87399	1.06241	2.73887	0.616857	0	1.59978	1.99905	2.38199	6.24512	2.85313	4.21611	0.429593	0.199535	1.34387	1.78086	1.05027	1.70709	0.382793	1.21313	0.221111	0.838348
2015-02-13	1.16469	2.00509	0.89275	0.829253	0.619251	2.05567	0	0.661181	1.2674	1.26963	4.33898	2.63303	1.59339	0.588551	0.209548	1.65504	1.4203	0.753662	1.65446	0.97719	1.09288	0.526785	0.79402
2015-02-20	0.710001	1.81344	1.70234	1.16217	1.15477	1.08793	1.47013	1.18398	1.52829	1.45262	1.85749	2.58459	2.33457	0.143694	0.944303	0.570078	1.35366	1.00322	2.79404	0.836095	0.483349	1.07788	1.16013
2015-02-27	1.08065	1.37411	1.24792	0.733605	1.2375	1.34048	0.883875	1.09859	1.52754	1.34802	4.08459	5.48472	3.98175	0.166426	1.02416	1.18694	1.14994	0.492871	1.35574	0.702126	0.987119	0.625776	1.39931
2015-03-06	0.901514	2.5939	0.658635	0.789121	1.50727	4.62856	1.74918	0.885985	1.11668	2.01046	1.94973	3.49473	2.0219	0.437569	0.508618	1.45158	0.888112	1.14283	1.15464	0.998009	1.01565	0.125832	1.76265
2015-03-13	0.818641	0.591541	1.1133	1.37913	0.521465	2.57382	1.87993	1.05097	1.98676	1.08557	2.13571	1.78495	1.74088	0.528796	0.166106	0.705465	1.69423	0.447246	1.09021	0.504783	0.89424	0.435542	2.11951
2015-03-20	1.54201	2.23842	2.23863	1.90271	1.15164	4.74463	1.65665	1.22414	0.872146	2.32365	2.91904	3.61726	3.09455	0.379882	0.177632	0.810252	2.41582	0.826754	2.053	1.5733	1.71629	1.66584	2.35063
2015-03-27	0.633747	1.34377	0.993668	1.15001	1.21528	3.32408	0.247764	0.646144	1.23155	2.3674	4.18662	4.48883	2.76633	0.425831	0.117604	0.717043	1.22999	0.459433	0.571876	1.1793	1.88929	1.60388	1.56974
2015-04-03	1.15019	2.09195	3.51138	1.41844	0.788936	1.69708	0.541815	0.687684	1.99043	3.15417	2.82445	2.03224	2.42793	0.320258	0.345427	0.777173	0.618757	0.855526	1.20767	1.18742	1.42971	1.08141	2.99273
2015-04-10	0.549615	2.12578	0.335567	1.33062	1.35621	1.58155	1.292	0.763194	1.18581	1.36694	4.74197	3.36993	5.50071	0.638478	0.213498	0.799478	0.871584	1.37366	2.22858	0.673144	1.87794	0.199334	1.78087
2015-04-17	1.37719	0.935057	0.993914	0.723293	0.446376	1.51309	0.807783	0.588335	1.74175	2.09797	2.64866	1.9136	2.29111	0.420008	0.454867	0.395258	1.06944	0.4571	0.406925	1.15429	1.5157	0.588342	1.78028
2015-04-24	1.56084	0.882154	0.851082	2.04618	1.64397	2.34525	1.24774	0.666109	2.92411	1.17134	1.24266	1.43246	2.47649	0.431988	0.394225	2.21187	1.16851	0.80745	0.939641	0.593047	1.15832	0.978031	1.87952
2015-05-01	1.2397	2.13605	1.37986	0.640516	1.57375	2.97702	0.249841	1.00116	1.45452	1.93163	1.76567	0.9408	1.01803	0.211987	0.402987	0.383861	1.13493	1.70262	3.00623	1.47187	0.680546	0.219327	2.31199
2015-05-08	0.711416	1.59498	1.04291	0.857862	3.02575	1.99226	2.85465	0.775281	2.12996	1.92869	2.11101	1.64048	1.5012	0.446516	0.308703	0.899039	0.910018	0.803101	1.91898	1.54703	1.34119	1.64606	2.26308
2015-05-15	0.440911	0.644667	0.682134	1.11206	2.63053	0.982741	0	0.782641	1.8725	2.9496	1.36357	1.18953	1.03973	0.872794	0.202949	1.55209	0.694427	0.775473	1.74799	0.621727	1.07197	3.4715	1.54431
2015-05-22	0.885489	2.23996	1.48634	1.15626	1.94545	2.31556	0	0.701938	0.95861	1.99152	2.75637	2.04344	1.95056	0.235631	0.220904	0.475348	1.23302	0.821695	1.80031	1.08107	1.17672	0.470408	1.91766
2015-05-29	0.319311	1.00589	0.939346	1.09227	1.26212	2.27912	0.860122	0.442123	1.07888	2.09381	2.52648	2.84523	3.35958	0.31824	0.197731	0.522585	0.657996	0.645101	1.03393	0.580173	0.689156	0.476056	0.949456
2015-06-05	1.09579	1.2249	1.14729	1.3891	2.52247	3.37672	0.256284	1.39183	1.37851	2.30976	2.30369	2.15999	2.15319	0.155963	0.163535	0.549381	0.804916	0.677248	1.23682	0.46908	0.523285	2.43815	1.40864
2015-06-12	0.77749	1.48117	1.10771	1.46007	2.00024	2.39273	0.553988	0.700022	1.30151	2.18555	2.25705	2.1702	2.2146	0.389338	0.107529	1.36915	1.48213	0.653956	0.400643	0.980168	0.533448	0.88406	1.69072
2015-06-19	1.08737	1.53349	1.48533	1.22561	1.06585	1.49972	1.62991	1.02986	0.947372	1.70221	0.95112	1.83728	1.88138	0.267908	0.127739	0.28939	0.936456	1.13631	1.29206	1.22907	0.718108	1.38678	0.852844
2015-06-26	0.961055	2.21556	1.0957	1.08972	1.84678	0.525886	2.04648	1.01713	1.84643	2.01961	1.31239	1.75905	1.32729	0.837677	0.0765432	1.08134	1.12683	0.480814	1.10245	0.949121	1.6698	0.304633	2.36043
2015-07-03	0.745644	1.16539	3.53746	2.43866	2.85924	1.37828	0.476245	2.40049	1.7193	4.05998	2.36952	1.70818	1.48475	0.617289	0.270747	0.288063	0.534913	0.627487	0.258889	0.368571	1.98989	0.38235	2.71092
2015-07-10	0.797877	1.08497	1.13289	0.864018	3.26043	2.24122	1.74108	2.2921	2.30638	1.36518	3.91837	3.41795	3.02911	0.725824	0.573759	0.46892	3.27744	0.72896	2.55315	2.07691	1.91568	0.790087	5.53474
2015-07-17	0.872062	1.44504	1.99914	0.884148	0.624013	1.75015	0.558084	0.713711	1.33052	0.498771	1.7416	1.91797	3.35614	0.724504	0.579572	0.542869	0.732505	0.458757	0.768923	0.797325	1.69332	0.718847	2.40486
2015-07-24	0.796776	1.11002	1.73707	0.433528	1.4338	1.48389	1.52536	1.19726	1.59324	1.9909	1.50714	1.24876	1.46679	0.800006	0.0729966	0.589046	0.818317	0.799727	0.607511	1.72247	2.08531	0.771792	1.32019
2015-07-31	0.31791	1.23977	3.12595	1.01916	2.24034	0.236256	2.15417	1.7956	1.28279	1.9308	2.05277	1.49244	2.04327	0.305344	0.2083	0.706809	1.48165	0.603931	0.738071	0.467647	1.29623	0.734554	2.01697
2015-08-07	1.46732	1.16997	1.12457	0.674511	1.78088	1.66444	1.4869	1.55172	1.29912	0.559186	1.83924	1.97759	2.94768	0.283653	0.190832	0.55853	0.582207	0.496033	1.17338	0.59224	2.19771	0.908949	1.34989
2015-08-14	0.782404	2.30541	4.90861	3.09978	1.23258	2.95529	1.32108	3.98412	0.816132	3.33752	2.55491	1.9306	2.7699	0.110216	0.12031	0.947945	2.29453	0.748942	1.78986	1.02039	0.907643	0.63834	2.66384
2015-08-21	0.993463	1.42929	1.21109	0.764964	1.01481	0.495624	2.13861	1.49914	1.17556	2.44056	2.27612	1.32579	2.42632	0.198081	0.0485417	1.07685	1.65466	0.76938	2.40849	1.18903	1.97929	0.594286	1.39548
2015-08-28	0.325452	1.47193	0.964179	2.70071	2.15097	4.17855	1.98884	1.30032	1.86518	0.59688	6.18138	5.45869	4.90125	0.0899059	0.106874	1.36561	2.94502	1.25023	2.48724	2.55456	5.33367	0.970036	4.30235
2015-09-04	0.977203	1.0849	1.27292	0.286071	3.69705	0.480764	1.04548	0.696682	2.30341	1.84158	5.93342	4.34727	10.9241	0.841281	0.113163	1.20486	1.94635	0.676912	0.775016	0.560305	2.58974	1.30102	1.74237
2015-09-11	0.727259	1.94831	1.02137	0.198188	1.5066	1.5661	0.643484	0.871635	1.71115	0.972666	2.94986	2.01493	1.18563	0.501355	0.496951	1.33002	1.65706	0.641752	1.55894	1.022	1.90617	0.882923	2.38895
2015-09-18	1.1325	1.52822	1.40193	0.965787	0.950955	0.675627	1.28378	0.965175	1.76234	4.55945	3.80851	2.41897	3.32275	0.491983	0.375303	0.966884	1.33692	0.894992	1.60306	1.77116	0.514478	0.343904	2.33772
2015-09-25	0.29088	1.48559	1.26445	1.36164	1.17871	1.56003	0.635318	1.56566	2.2517	2.19966	2.94166	1.43201	1.76231	0.499975	0.133967	2.16827	1.58369	1.17525	1.84019	1.42724	3.19451	0.435233	1.44746
2015-10-02	0.554301	1.73637	0.596727	0.472413	1.42154	0.405278	1.54535	1.19381	1.65497	1.3353	1.854	1.70187	1.92265	0.609865	0.234849	0.818347	2.04788	1.38889	2.96229	1.14966	3.07063	0.635959	3.1239
2015-10-09	0.130913	1.82487	1.31347	1.16549	1.89131	1.50651	0.644933	0.840905	0.943088	1.73338	2.3973	2.54678	2.39052	1.37864	0.111706	2.08236	1.56946	0.786717	1.79892	2.12947	2.08843	0.639174	1.63545
2015-10-16	0.575133	2.24645	1.00171	1.7826	1.22584	1.28735	1.99543	1.82339	1.69237	2.17459	2.6708	2.3622	2.36168	0.358553	0.0909428	1.05572	0.546498	0.453326	0.481133	1.20481	2.33201	0.270159	1.15349
2015-10-23	1.20608	0.602133	0.998372	1.1223	1.02813	1.67514	0.477318	0.858128	1.57481	1.2261	1.13891	2.11579	2.89732	0.596175	0.208886	1.45497	1.12491	0.707884	1.00691	0.649035	2.32187	0.523694	1.42456
2015-10-30	0.626248	0.474455	1.04923	0	0.643881	0.82166	1.58232	0.990288	1.31231	2.03149	2.93848	2.65311	2.32761	0.3453	0.257327	1.31531	0.726096	1.3829	2.62671	1.17004	1.67908	0.928559	1.70113
2015-11-06	1.1694	1.44238	1.27623	1.02398	0.822745	0.985139	0.688221	1.10062	3.47359	2.09529	2.77455	4.61478	2.77389	0.505262	0.203179	1.28502	1.1126	0.472847	0.481193	1.21493	2.41131	0.820183	1.14534
2015-11-13	1.12268	1.1078	1.22766	0.184905	1.00359	3.09104	1.09541	0.761302	2.91163	2.47729	1.61137	2.9062	1.52285	0.727173	0.625884	1.63558	1.06841	0.440147	0.623832	0.409805	1.85631	1.26262	1.53947
2015-11-20	0.667315	2.31213	0.458155	0.471537	0.435836	2.55716	0.680704	0.518888	2.46669	1.27179	2.10086	0.899006	1.44843	0.906321	0.585372	1.73261	1.29113	0.849595	1.39405	1.18642	1.97084	0.50558	0.858279
2015-11-27	1.02328	1.24326	0.247209	1.19953	1.63602	0.534187	0.508744	0.593269	1.22977	1.76777	2.11333	1.88691	1.62952	1.41127	0.371665	0.37325	2.09555	0.682712	0.722877	1.68042	2.12974	0.809509	4.7455
2015-12-04	0.621097	1.85026	1.32971	1.36794	2.72229	0.530702	1.10747	0.285503	1.8333	1.76153	2.09901	3.28459	3.05122	0.963585	0.356272	1.60039	1.09722	1.32721	1.8224	1.11524	2.54907	0.473764	1.2235
2015-12-11	1.5236	1.31391	1.00796	1.12398	1.64498	3.14623	0	1.29013	1.68271	1.29971	2.34093	2.95038	4.01148	0.431501	0.307276	1.42483	1.32101	0.424305	0.886227	2.16115	1.85221	1.32947	1.71769
2015-12-18	0.818037	0.531016	1.32736	0.170223	2.85953	1.27503	3.19287	1.07784	1.01427	1.35072	3.01137	2.93388	1.60878	0.37396	0.29182	1.22145	2.17765	1.43948	2.89818	2.36462	2.1682	0.931752	1.95437
2015-12-25	1.10863	1.41736	0.746676	0.690996	1.64483	0.880151	1.36653	0.348126	0.639511	1.09764	1.97177	1.84988	4.57096	1.416	0.382859	1.5612	1.21197	0.792937	0.521463	1.19666	0.770975	0.359862	1.57871
2016-01-01	0.433063	0.755868	0.617025	0.768868	0.86941	2.83495	0	0.836936	1.53982	1.28594	3.24751	5.20512	2.54842	1.73195	0.363683	0.334713	0.497647	0.320222	1.42217	2.24846	0.66702	0.248917	0.859533
2016-01-08	1.81828	0.852259	1.16695	0.763312	0.723329	2.68986	0.950766	0.666374	1.93383	3.52978	2.11748	3.83765	3.34712	1.26606	0.318918	0.994611	1.15317	0.742291	1.04683	1.93761	4.00606	0.539706	1.8971
2016-01-15	2.18259	1.4044	1.46542	0.359799	2.77406	0.750805	1.78909	0.86217	1.97771	1.50307	3.63661	3.2099	2.41622	0.264198	0.273558	1.2768	1.56491	0.714685	2.26081	1.12945	3.36565	0.704673	2.43748
2016-01-22	2.40843	1.74897	0.849698	0.982037	1.82063	1.8208	0.293256	0.657042	1.91526	0.527293	7.25351	7.02196	1.74536	0.539881	0.46686	1.83098	1.1773	0.861254	0.791493	2.29745	1.94675	0.38291	1.41286
2016-01-29	1.41741	1.27464	0.899663	0.999129	0.723378	2.90818	0	1.18851	0.831495	0.841097	5.5651	6.16219	3.9197	0.500673	0.240021	0.651343	1.59844	0.47868	1.3035	1.90434	1.62426	2.63949	1.17435
2016-02-05	3.09359	1.92984	0.315954	1.55522	1.20126	1.05032	0	0.79979	1.60512	3.66629	5.58478	4.36173	4.34925	0.159803	0.153149	0.921546	1.22173	0.592498	1.3708	1.89154	1.72297	1.37197	2.31051
2016-02-12	1.80134	1.77954	0.469181	0.753291	1.67123	0.366508	0	0.68778	1.45019	0.762162	7.08938	4.88593	5.09456	0.386313	0.0719742	1.30397	1.3044	2.61323	2.65046	1.187	2.39475	1.00813	2.65473
2016-02-19	1.42186	0.451147	0.779214	0.659267	0.956652	2.95591	0	0.445023	1.18209	1.06125	3.3863	3.34116	10.4764	0.396322	0.196744	1.8669	0.772463	1.39443	1.20119	1.14993	1.09997	1.02008	2.40462
2016-02-26	1.30032	1.37186	0.674983	0.783564	0.575875	2.82267	0	0.423889	4.01714	0.807918	3.95104	2.3966	12.4157	0.253351	0.0949624	0.492975	1.46964	1.74405	1.57215	1.86521	1.2254	0.289168	2.06695
2016-03-04	1.11152	0.914779	0.289018	0.962558	2.80927	0.998581	1.95452	0.889793	1.29578	0.993544	2.16243	1.43845	2.08452	0.324374	0.109285	0.662812	1.38729	0.747077	1.50859	1.75325	1.83011	2.1554	1.50207
2016-03-11	1.11522	0.934454	0.431016	0.792187	1.22644	2.19379	1.59797	0.129943	1.42349	0.680968	3.18854	2.64272	3.74981	0.154127	0.22368	0.624786	1.77345	0.668262	0.970031	2.48112	2.01704	0.699348	4.66706
2016-03-18	1.38651	1.34997	0.50866	0.859983	1.4995	2.13049	0.718856	0.335707	1.43048	0.882635	4.21558	9.84371	1.96096	0.359278	0.0754612	0.759793	1.43348	1.60157	2.52848	1.70149	1.57337	0.351929	2.49198
2016-03-25	1.00787	1.56329	0.317873	1.21187	0.941778	1.90878	0.654505	0.617268	2.4773	0.539143	4.37739	3.2275	1.28766	0.501468	0.232109	1.07031	1.07437	1.08207	1.51787	1.72025	2.15912	0.377943	0.879268
2016-04-01	0.976323	0.563841	2.29812	0.717961	1.22228	1.89005	0.492997	0.654323	1.46258	1.76828	2.00829	2.8943	2.16692	0.951085	0.560768	0.819663	0.434165	0.96947	1.86678	1.64073	1.15831	0.591272	1.33198
2016-04-08	1.01895	1.39039	0.435001	0.581998	0.882056	1.78534	1.33023	1.05599	1.76906	1.04137	5.08573	5.32537	3.009	0.302164	0.111585	2.1289	1.42832	0.775016	0.374075	1.27897	0.90154	0.510968	1.68027
2016-04-15	0.895282	1.29101	1.76047	1.36944	0.947723	2.12379	2.00118	1.34621	3.2847	1.68787	2.58835	2.96563	2.2315	0.351097	0.0955837	0.197152	1.09711	0.952125	1.59339	1.21036	1.57104	0.0603174	1.66403
2016-04-22	0.770651	1.33788	2.64854	1.5645	2.61935	2.00489	4.13795	2.66793	1.91909	4.07247	2.53729	2.41808	2.01171	0.32753	0.309771	1.398	0.724335	0.863415	2.05926	1.71883	2.10815	1.09075	1.85601
2016-04-29	1.03254	1.37694	0.76493	0.312882	1.8758	1.23209	1.82876	0.792343	2.30042	1.02736	3.26619	1.93523	1.63114	0.843552	49.379	1.51779	1.39539	1.02868	0.820997	1.71879	1.61432	0.080667	0.573691
2016-05-06	0.954194	1.20572	1.52758	1.02627	0.702505	3.17659	1.87487	2.03371	2.6025	2.20142	1.84676	1.05113	1.34865	0.637128	0.183813	0.684279	1.27447	0.77178	1.18747	1.2516	2.14635	0.363196	2.19796
2016-05-13	1.08395	0.618816	2.19226	0.750988	1.3639	1.02603	2.8588	2.83521	1.9339	1.30838	2.48933	4.30827	3.89218	0.534444	0.198653	1.15773	1.41704	1.09972	2.10926	1.62805	2.54346	4.24503	3.01788
2016-05-20	1.20363	2.13433	1.45941	1.2263	1.49524	1.33869	0	0.720934	0.972953	1.08277	1.64917	1.29493	1.90444	0.512259	0.208625	1.13752	0.482252	0.903711	1.76852	1.75966	0.945612	0.334478	1.19397
2016-05-27	1.0605	0.447829	0.647836	1.2244	1.09108	1.28516	0	1.84708	1.6389	1.57708	0.977727	1.18495	1.67541	0.955144	0.307992	1.92477	0.558958	0.489701	0.533917	1.19645	3.19788	0.16961	1.15506
2016-06-03	0.756616	0.910557	1.49	0.596768	0.934029	1.45354	0	2.3553	1.74213	2.8648	0.440389	0.893892	1.61659	1.13192	0.302777	0.820972	1.13462	1.16564	1.2908	1.15542	1.78788	0.0676444	0.217119
2016-06-10	0.422373	2.29813	1.35326	1.41507	2.40363	2.59698	0	1.46803	1.16409	3.36031	2.17732	2.26594	2.12465	0.529738	0.369855	1.23569	1.20104	0.657078	1.86319	1.92678	2.0228	0.239984	2.13771
2016-06-17	1.44385	1.04192	2.0875	1.09621	0.983383	1.56539	4.62556	1.63782	1.24334	1.45845	2.79189	2.12078	2.44661	0.538385	0.177043	1.87565	1.92326	1.41072	1.3122	0.787588	0.95589	0.964321	1.68852
2016-06-24	2.9286	1.58413	2.8378	2.44782	0.579622	1.21438	0.919676	0.811876	0.839484	1.53638	3.08836	2.83091	3.57198	0.413462	0.138264	1.79213	1.51989	1.98928	1.34737	1.57859	1.84388	0.511797	1.73206
2016-07-01	1.33521	1.39078	1.74957	1.78171	1.4389	1.91294	2.1813	1.79295	2.95518	1.62139	3.46147	3.60547	2.09606	0.921429	0.221053	0.856954	0.917143	0.843239	2.31544	2.0266	0.675275	0.0611896	2.54915
2016-07-08	0.484675	0.986654	2.99762	0.360387	2.25401	1.18897	2.48775	3.53048	1.60635	1.36848	2.9347	2.78028	4.19152	0.573205	0.299326	0.560032	0.902645	1.09152	1.73105	1.23915	1.69262	0.0247909	3.33895
2016-07-15	1.41162	1.96381	1.69377	1.84418	1.62544	2.85321	0	2.42214	2.59492	1.70792	3.3153	2.50959	2.18625	1.31803	0.154126	1.90738	1.16213	0.616235	1.36375	0.494971	0.992473	0.635283	2.28026
2016-07-22	1.36697	1.09775	1.93117	1.01804	1.09001	0.660617	1.6709	1.70648	0.568323	1.98825	1.1033	1.56844	1.20678	0.5606	0.158134	1.39987	0.782158	0.498441	0.797798	1.42457	1.97597	1.18792	2.23603
2016-07-29	0.552516	1.2861	0.775667	1.23944	0.877399	3.78232	0.858129	1.99038	1.56921	2.21119	1.30319	0.748237	1.78761	0.706506	0.194975	2.05244	1.05793	0.434597	0.73069	2.12194	0.564976	1.35197	1.71502
2016-08-05	1.61293	0.580913	1.62476	1.21998	2.07022	3.98343	2.61167	2.40582	1.90678	2.59765	2.87332	1.73595	1.78476	0.694711	0.234595	1.24078	0.498481	1.16411	1.86	1.36498	1.64745	1.01772	0.922758
2016-08-12	0.994215	0.334303	0.508413	1.85492	0.65643	2.83179	0.747969	0.598977	1.78731	0.947143	2.69655	1.91441	3.13328	0.14311	0.0765492	0.855472	1.15154	0.335013	0.95867	2.02497	3.58875	0.155216	1.98904
2016-08-19	0.964492	1.16075	0.657367	1.43515	1.25666	1.41185	0.476177	1.30487	1.74456	11.1092	1.15459	2.75307	0.476763	0.411827	0.905567	0.672137	0.690464	0.508903	1.1746	1.79752	1.52778	0.570692	1.70169
2016-08-26	1.56813	1.48661	1.19704	0.915731	2.97928	2.14165	1.19105	1.47303	1.86285	2.17514	2.52593	1.36347	1.99285	0.865237	0.207793	0.799604	0.672326	0.660579	1.24536	0.961525	0.894553	0.0296221	1.05283
2016-09-02	1.19748	0.717064	2.79117	2.31451	1.80111	3.26566	0.470588	1.78878	2.01726	5.01755	2.57603	2.06148	2.17204	0.191005	0.422707	2.38638	0.208585	0.619098	1.05618	0.939697	1.17881	0.100528	0.954535
2016-09-09	1.76578	1.11221	0.892896	1.13276	1.27009	1.37565	0.496296	2.28706	0.538932	0.799505	3.01328	2.69665	2.31232	1.18834	0.301012	1.52469	0.502744	0.693454	1.64378	1.44502	1.70267	0.344392	0.518963
2016-09-16	0.964735	0.246125	1.23643	1.55545	0.544757	1.81734	0.955001	1.64097	2.48538	1.2179	1.86172	1.78686	4.24103	1.30954	0.506723	0.703879	1.07295	0.326579	1.61017	1.28036	0.951295	0.0242802	1.26028
2016-09-23	1.66915	1.68524	0.863867	1.5272	1.01589	2.06114	0.759612	1.83275	0.627622	0.463189	2.67791	1.925	3.20111	0.501532	0.306906	1.72018	1.03408	0.451078	1.66179	0.990993	1.50963	0.403104	1.7852
2016-09-30	1.53855	0.446734	1.88758	1.02986	2.07432	0.914828	1.13687	1.21453	1.71568	1.76163	2.78888	2.74117	2.7165	0.546671	0.610299	1.31931	0.724743	0.543293	1.38809	1.26544	1.10874	0.156694	1.61829
2016-10-07	0.896324	1.17557	1.83327	1.38832	1.79402	2.294	8.82958	1.09868	2.35778	3.14623	1.5915	2.11936	1.43766	0.98113	0.758926	1.547	0.573717	0.861493	1.47994	0.853382	1.80082	0.0318614	1.7505
2016-10-14	1.84731	1.08025	2.48071	1.39445	1.49545	1.98157	0.75044	0.787375	0.6451	1.9334	1.13835	0.67599	1.65618	0.88687	0.208728	1.28385	1.31147	0.448947	1.36682	0.412716	0.787874	0.0363051	1.77174
2016-10-21	0.54488	0.929471	1.30213	1.33036	0.564138	1.31062	1.27202	1.09984	0.875673	0.652255	1.87298	1.17112	1.21874	0.665403	0.644748	1.1874	0.226259	0.474862	0.88613	0.706871	0.950397	1.43524	1.27371
2016-10-28	0.760316	1.02484	1.45693	0.733532	2.84706	1.16863	1.53945	1.22806	1.45479	2.2664	1.57009	1.09628	0.934582	0.859816	0.501585	0.832317	0.846905	0.491391	0.642171	0.775437	1.52661	0.974219	0.430564
2016-11-04	1.44326	1.46695	1.0986	2.08772	1.56083	3.02165	0.972339	0.860494	1.7263	1.62375	1.42072	2.44413	2.87245	0.161264	0.694704	1.40611	0.548681	0.705589	1.85522	1.1726	1.69262	0.182983	0.961081
2016-11-11	1.76024	2.40149	2.62957	0.486608	1.164	1.78351	0	1.49924	1.7841	0.982443	1.77696	1.35022	1.32094	0.103425	0.402811	0.699952	1.76432	1.46408	2.62066	1.64419	1.73756	0.610362	3.40684
2016-11-18	1.18425	0.667952	1.60231	1.18539	1.19245	1.59457	0.266994	1.03939	1.29625	1.74248	2.69616	2.2991	1.26359	0.214445	0.214148	0.384903	1.2106	1.00001	2.32777	1.73583	1.57494	1.10523	1.72367
2016-11-25	0.521309	0.837422	0.808239	0.308336	1.0101	0.856488	0.1635	1.60274	1.45586	0.678263	2.41938	2.47845	1.84573	0.518506	0.464686	0.450612	0.982994	0.892029	1.00621	1.24279	2.03977	1.16684	2.28562
2016-12-02	0.779419	1.76429	1.83081	0.846366	1.83735	1.17827	0.397526	1.3846	1.21414	2.09601	4.29308	3.45254	3.55052	0.674469	0.853107	1.93544	1.84623	0.738243	0.714486	1.0697	2.27866	0.335111	2.77435
2016-12-09	1.17177	0.387557	2.52855	0.323023	1.37251	0.639026	0	1.14826	1.56157	1.56812	1.77267	1.00141	0.611032	0.274298	0.564381	0.553945	1.90918	0.715623	1.28565	1.20656	2.09954	1.55096	2.42121
2016-12-16	2.22534	0.704764	0.845398	0.897378	1.72046	1.74013	0	0.697914	2.28659	0.801215	2.46082	1.74594	1.24775	0.279384	0.532486	1.37447	1.01265	1.52363	4.11156	1.69104	2.26515	0.0298936	0.997266
2016-12-23	2.10331	1.68392	0.804786	1.21532	0.845712	1.67414	3.28378	1.35798	0.210194	0.380101	0.939618	1.86583	0.960831	0.127974	0.0846464	0.310751	1.17279	0.674785	0.545034	1.52754	0.87442	0.597379	1.40975
2016-12-30	0.753233	1.0542	1.72643	0.468075	1.55651	1.44429	1.90833	1.37452	1.17033	2.15358	1.15612	1.10788	1.26501	0.226819	0.244442	0.157481	0.975139	0.379928	0.967413	0.337882	1.46407	0.0228726	1.34617
2017-01-06	1.0994	1.31535	0.86191	1.42189	1.00114	1.78158	2.55954	1.44075	1.9273	1.41531	1.64263	0.713082	1.2205	0.248503	0.858409	1.06064	1.44906	0.915716	1.42227	1.70343	2.52074	0.161012	1.61954
2017-01-13	3.04763	0.77087	0.522777	0.725621	1.83492	1.44546	0	1.14378	0.764479	1.5164	2.67869	2.90938	2.98387	0.265802	1.28987	1.83425	1.52684	1.13666	1.27114	1.03176	1.61469	1.15811	2.59824
2017-01-20	1.35367	0.489394	0.900959	0.280479	1.59704	2.06716	0	1.07378	1.62651	1.71832	1.596	1.39075	1.73295	0.388366	0.670948	1.14911	0.889176	0.836016	1.61086	1.42012	1.59119	0.929931	1.08415
2017-01-27	1.70424	1.188	0.941254	1.27092	1.29651	2.8397	4.44069	0.436	1.14518	1.28732	1.15266	1.29772	1.37191	0.290461	0.248579	0.791266	1.46892	0.963233	1.52569	1.52242	3.61227	0.348128	1.62011
2017-02-03	0.848694	1.40192	1.21589	0.972696	1.92164	2.10032	0	1.30816	1.19662	1.93292	1.24152	1.67211	2.35701	0.215402	0.287077	1.07463	1.99273	0.82169	1.11216	1.06947	2.20124	0.424128	1.87369
2017-02-10	0.592496	0.914679	1.01764	0.501813	1.036	1.51213	0.683932	0.998215	0.893888	1.58084	1.47559	1.61706	2.93153	0.253311	0.130414	0.557831	2.35326	0.594849	0.834224	1.71658	1.12649	1.08187	2.31104
2017-02-17	2.83299	0.762989	1.2659	0.568034	1.17529	1.30984	0.247764	1.23804	1.4533	1.19453	0.889056	1.47291	1.04716	0.164079	0.515597	1.20706	0.982561	0.711125	0.556208	1.22045	0.514666	0.130244	0.673032
2017-02-24	1.23368	1.20891	0.793982	0.850547	0.745363	0.964847	0.525373	0.58461	1.68217	1.07351	1.123	1.27693	0.897487	0.226234	0.555779	0.914424	1.89671	0.611833	0.79319	1.33462	1.38885	0.580381	2.18062
2017-03-03	2.02793	1.4465	1.45389	0.928108	1.32993	3.12611	0.810822	1.25623	1.794	2.01887	1.2814	1.45072	3.05642	0.264411	0.317292	1.18365	0.862821	0.718939	1.18878	0.883575	0.912601	0.97716	1.73949
2017-03-10	0.966836	0.735683	0.780493	0.991019	1.48437	1.90245	1.37704	0.639035	1.68287	1.20799	2.06675	1.73801	2.04856	0.103872	0.198686	0.361266	0.956957	0.430759	0.770377	0.769443	1.28992	0.164518	2.28945
2017-03-17	2.08879	0.20021	1.48259	0.669354	1.96255	0.830793	0.911981	0.597671	0.292655	1.36744	1.37009	0.742604	0.6663	0.257777	0.131299	1.02125	0.277012	1.11774	1.30786	1.20981	1.60932	0.540559	1.16944
2017-03-24	2.35473	1.25168	0.33912	0.710939	1.28391	1.64753	0.642428	0.710328	1.74356	0.825691	1.01402	0.716925	1.27704	0.447346	0.357611	1.23303	0.9902	0.433893	0.29204	0.683122	0.706056	0.448162	0.772218
2017-03-31	1.13638	0.565132	0.908827	0.552992	0.96163	1.12224	2.15558	0.659296	0.897888	1.08757	1.37969	0.661397	0.645746	0.29284	0.187621	0.4442	1.55628	0.3437	0.82984	1.20739	1.29752	0.185819	1.41165
2017-04-07	1.72669	0.618086	1.18412	1.36864	1.38229	2.01067	0.600454	0.595073	1.63709	0.821279	0.813268	3.7139	2.64093	0.176603	0.115939	1.31075	1.30958	0.642147	0.448406	0.827885	1.15285	0.322553	2.20426
2017-04-14	1.56586	0.274961	0.848425	1.42109	0.929348	1.52741	0.483995	0.608685	0.655743	0.775882	0.766148	0.813402	0.83985	0.470115	0.546352	0.996266	1.43483	0.998795	1.61479	1.85515	1.30518	0.525228	1.49905
2017-04-21	2.61911	1.90298	0.64075	1.07086	1.35833	1.74939	0	0.543559	1.28797	1.59789	1.42397	0.943964	1.72897	0.383625	0.253613	0.24297	1.24636	0.386113	0.676518	0.626384	1.70102	0.938332	2.35046
2017-04-28	1.76414	0.843357	1.52005	0.975679	1.0435	1.77631	0	0.775627	3.25759	2.24311	0.919276	1.00052	0.843784	0.440704	0.371087	1.59642	0.507974	0.462035	0.586553	1.05118	1.08715	1.41767	1.08658
2017-05-05	1.90087	1.12964	2.50818	0.590662	3.13888	1.30095	0	0.859671	1.73253	3.06747	2.44685	2.64488	1.78601	0.720143	0.56046	3.52468	1.87605	0.54519	0.805654	1.45991	1.38298	0.477616	1.93288
2017-05-12	1.99203	1.29714	1.49673	2.25877	1.29437	1.93981	0	0.667486	1.35633	0.731982	1.62382	0.990532	2.08246	0.684091	0.275181	2.73561	1.046	0.532517	0.770526	0.797229	1.48158	0.337065	1.16348
2017-05-19	1.80993	1.8327	1.18169	3.44635	3.5415	0.679056	0	1.34319	1.73946	2.94866	1.04836	0.957327	1.16129	0.770426	0.453451	1.69739	0.951759	0.752589	0.969562	0.996405	1.80174	0.0628316	1.37077
2017-05-26	2.75789	1.41174	1.15544	0.895313	1.93232	1.67648	1.13139	0.764411	2.00147	1.10825	2.6839	2.09795	1.75749	0.15784	0.0632373	1.60901	0.789009	0.544017	1.06213	1.28531	2.28884	0.224986	1.25198
2017-06-02	2.89005	0.908415	1.44689	0.480241	1.24893	1.11747	1.57661	0.84541	1.76819	2.65882	1.24798	1.11458	0.533765	0.734445	0.335327	1.66162	0.409448	0.623423	1.02956	1.21082	0.895613	0.167477	1.10587
2017-06-09	1.26935	1.22552	0.877099	0.845751	3.78133	2.34614	0.965982	0.406566	0.68154	1.17883	2.46483	3.557	2.68847	0.49842	0.166554	1.11874	1.12913	0.944221	0.940538	1.28023	2.17475	0.27429	0.997961
2017-06-16	1.67767	0.770626	1.90262	0.589792	1.07659	1.4194	0.998741	0.671017	0.457956	1.84467	1.81237	1.80984	2.62043	0.453102	0.305789	1.24201	0.393761	0.982808	1.79349	1.52627	1.79512	0.509616	1.51091
2017-06-23	2.67283	2.49462	1.00084	0.92653	1.67913	2.39871	0.905297	0.756399	2.07024	1.11989	1.26674	1.39587	1.39281	0.56188	0.474108	0.796248	1.11861	0.480759	0.832205	0.995226	1.18694	0.324357	1.53657
2017-06-30	2.07736	0.772822	1.58364	0.945821	3.25056	3.46298	1.06917	1.17178	3.03831	3.74667	0.947595	1.3707	1.07586	0.510769	0.234544	0.796269	0.620976	0.501275	0.853899	0.929103	1.11317	0.561417	1.2173
2017-07-07	1.32501	0.86394	0.780267	1.52635	3.81075	2.50916	0.79695	1.05891	1.48652	3.29963	1.56028	1.17495	1.17872	1.49597	0.217373	0.986304	0.408316	0.805628	1.68101	0.789471	1.19057	0.709136	0.96525
2017-07-14	1.97469	1.35858	4.40318	1.49113	4.47805	1.66569	0.961787	3.0714	2.95764	3.99095	0.430286	1.28559	0.836004	0.874125	0.196288	1.07137	0.606123	0.553689	1.03805	1.82245	1.63901	0.38073	1.46538
2017-07-21	0.602627	0.444838	2.33403	1.42889	1.37174	1.56761	0	1.10269	1.41804	0.785125	1.45305	2.05055	2.21681	1.2174	0.238316	0.90587	0.729023	0.244522	0.482274	1.11051	1.33999	0.335795	1.40839
2017-07-28	2.40009	1.34737	1.38989	1.1146	1.77703	1.77706	0	1.28277	1.94782	1.75731	0.982347	1.28758	1.42248	0.714235	0.103314	1.14146	1.43029	0.553786	0.529828	0.892318	1.24807	0.267778	1.03758
2017-08-04	1.82571	0.907314	1.38285	0.661912	1.89399	1.94429	0	1.64741	2.28487	1.00809	1.44746	1.10088	1.16259	0.84879	0.148361	1.21233	0.372756	0.443422	1.03373	0.7141	1.29348	0.957574	0.793584
2017-08-11	1.08913	1.34707	2.35624	1.65453	1.17263	1.43006	0	1.57163	0.849446	2.34121	1.23049	1.36345	1.06917	0.630824	0.170964	0.374989	0.672031	0.74056	1.33784	0.296499	1.47009	0.809049	2.15632
2017-08-18	1.75616	1.33121	1.1776	0.916538	0.648258	1.73948	1.94471	0.862016	2.02213	1.88316	2.20585	1.99252	1.80622	0.862125	0.256579	1.75524	1.2243	0.789689	1.60272	1.52955	1.81143	1.66858	2.44202
2017-08-25	1.17275	1.24877	0.746674	0.50232	1.8042	2.12775	0	0.492145	0.850157	1.77408	1.98146	2.15157	2.14631	0.0579497	0.327176	1.23137	1.03004	0.33212	0.264605	0.474318	0.607559	0.389734	1.98816
2017-09-01	1.52233	0.638421	2.24689	0.660076	0.959139	2.11408	0.224123	0.786435	3.0004	1.20098	1.99711	3.91757	5.84332	0.373124	0.051945	1.018	0.87461	0.651621	0.923756	1.50049	0.784845	0.512182	1.39728
2017-09-08	0.967861	0.840773	1.60002	1.79749	0.982584	3.69802	1.77156	0.976329	1.16953	1.2104	2.25407	0.9958	2.54443	0.564986	0.6575	1.38101	1.54892	0.443873	0.531768	0.520737	2.22551	1.4858	2.50109
2017-09-15	0.889776	0.81901	0.727353	1.89752	0.77344	2.52467	0	1.09347	1.58041	1.33141	0.859104	3.05846	4.45423	0.167303	0.4684	0.214642	1.10044	0.376953	0.398911	0.866455	0.995264	0.43962	2.91822
2017-09-22	1.31476	1.34852	1.33737	0.633058	1.08929	2.0535	1.28869	0.723376	2.19945	1.53244	0.888266	1.22217	1.23519	0.287026	0.433207	0.832582	0.375491	0.863367	1.32275	0.725021	1.13684	0.375486	3.17211
2017-09-29	1.6401	0.857903	0.654731	0.795305	0.758303	1.57173	0	1.12623	1.94313	2.0908	1.57029	2.27386	3.35503	0.476956	0.116796	1.40416	0.879761	0.622614	0.474532	0.602264	0.559213	0.0244002	1.77088
2017-10-06	0.660986	1.0181	0.448448	1.04719	0.93137	1.51583	0.387579	0.909858	2.47962	4.04457	1.72529	3.73651	2.39841	0.528552	0.381034	1.15756	1.33097	0.34706	0.56468	0.544513	1.69641	0.951292	1.29193
2017-10-13	2.14027	1.05871	0.735159	0.753674	1.24419	2.51521	0.142198	1.22532	0.507312	1.21433	1.49593	1.90191	1.66198	0.149226	0.515841	0.827019	0.743758	0.478618	0.722442	0.343967	2.04	0.405625	1.41057
2017-10-20	1.60204	1.12903	0.391924	0.440056	1.53866	1.38004	0	0.433208	0.737567	0.72429	0.919725	0.768226	1.11506	0.187271	0.295136	0.953562	2.10435	0.878483	1.50161	0.84199	2.1267	0.180828	1.09872
2017-10-27	1.1644	0.657717	1.175	2.021	2.06096	1.07848	0	0.48869	1.89781	1.18642	1.26232	1.59579	1.10772	0.247214	0.605679	0.643094	1.21509	0.274896	0.456337	1.04993	0.790416	0.257999	1.256
2017-11-03	1.59321	1.65671	0.896245	0.706581	1.59288	1.30029	0	1.00958	1.296	2.34802	0.776879	0.882177	2.07877	0.50325	0.312947	1.75869	0.692158	0.56993	1.59008	1.00108	1.30462	2.82962	2.63821
2017-11-10	0.919087	0.628582	0.841096	0.913522	0.969705	0.765111	0	1.07097	0.412617	0.592177	1.5601	1.298	2.03446	0.182285	0.131211	0.679614	1.20808	0.551514	1.58354	0.425989	1.02734	0.0651571	1.90336
2017-11-17	0.763442	0.814824	0.998605	0.332596	1.50984	1.00809	0.920067	1.26058	0.371019	1.46285	1.40528	1.33062	1.30536	0.447837	0.20338	0.417714	1.36356	0.244789	0.350345	0.861694	0.9022	0.0852968	3.63553
2017-11-24	0.991827	0.560722	0.281267	1.069	0.877165	0.232536	1.5571	0.560589	1.59436	1.25202	0.91173	0.342737	0.835773	0.251266	0.344407	1.09691	0.348586	0.325872	0.853538	0.79025	0.554737	0.347536	0.722731
2017-12-01	1.94654	1.20682	2.26852	1.11493	1.18506	1.40515	2.39655	0.704528	0.885013	1.60649	1.24483	1.68962	0.967092	0.490147	0.499525	1.51876	1.16166	0.541107	1.05125	1.03018	0.48513	1.02844	2.69124
2017-12-08	1.46985	0.755754	1.03546	0.89972	0.960794	1.30875	1.04616	0.889455	1.14947	0.527714	1.95372	2.55418	2.05511	0.455014	0.709893	0.660338	1.96454	0.322435	0.526996	0.226915	1.42406	1.56527	2.56388
2017-12-15	1.30056	1.24872	0.6664	1.22305	1.6465	0.499989	0.259255	0.471266	0.525594	1.18675	1.07762	0.98032	1.76164	0.590799	0.940004	0.541979	0.637291	0.601181	0.745523	0.548427	0.592355	0.134744	2.07484
2017-12-22	1.98263	0.787307	0.409693	1.34392	0.834994	0.81144	0.786906	0.336561	1.8498	0.799497	0.521879	0.425973	0.925047	0.501261	0.398453	0.708091	0.396821	0.372136	0.655473	1.15872	1.00626	0.719278	1.29489
2017-12-29	0.867583	0.505387	0.458308	1.00334	0.152373	1.6454	1.07122	0.919216	0.825669	0.881075	0.905875	1.65219	0.72291	3.12316	0.366512	0.886661	0.871325	0.305039	0.415054	0.361423	1.15346	1.66714	1.53437
2018-01-05	1.23137	1.32105	0.67361	1.0037	0.571844	1.04371	0	0.224859	0.714859	0.948528	1.06933	1.24179	1.40951	0.433751	0.807664	1.58259	0.66295	0.289154	0.319222	0.569051	1.37819	0.0259025	1.38841
2018-01-12	1.00996	0.994512	0.939069	1.92515	0.529889	0.841491	0	1.09106	1.21214	1.67724	0.651508	0.51735	0.86612	0.527618	1.41207	0.853975	0.455512	0.523345	0.725335	0.563838	1.58884	0.265823	1.68712
2018-01-19	1.86711	1.22438	0.732039	0.913248	1.6098	1.68246	0.988227	0.359409	1.42578	0.949697	0.474853	0.427681	0.92968	0.722392	0.732555	0.919087	1.32984	0.511639	0.259764	0.739955	1.75588	1.0931	1.77531
2018-01-26	0.904289	0.96772	0.937618	0.811594	3.02142	0.623618	2.12361	0.597635	0.659289	1.32422	0.767085	0.845146	1.04134	0.312947	0.250287	1.15988	1.97645	0.601269	1.54973	1.34844	1.12889	0.686574	2.3171
2018-02-02	1.63582	0.714957	0.791621	1.57114	1.1267	1.3548	1.0682	0.879406	2.03831	1.38294	1.27082	1.29682	1.07131	0.143371	0.226781	1.36648	0.742406	0.607206	1.3824	0.372288	1.42822	0.822789	3.19443
2018-02-09	0.820071	0.685196	1.18649	0.628914	0.842625	1.46477	2.22191	1.08112	1.66962	2.09038	1.0364	0.77096	0.700138	0.157142	0.655997	0.876338	1.69048	0.356555	0.763624	0.222661	0.825579	0.803302	1.87306
2018-02-16	2.12591	1.09927	1.50854	0.416885	1.81185	0.902903	5.07866	1.12973	1.33041	1.87732	0.932437	1.05983	1.20138	0.135602	0.724459	0.448145	0.972577	0.464335	0.692402	1.18765	0.952974	0.752275	2.39993
2018-02-23	0.975764	0.53182	0.317636	1.36054	1.09095	1.97311	0.16856	0.372737	1.05217	1.03781	0.847352	1.08714	1.21519	0.0940213	0.166058	0.960019	0.943291	0.356958	0.750315	0.436371	0.553069	0.49006	1.47408
2018-03-02	1.03933	0.994431	1.01566	1.35337	0.827272	1.15204	1.5436	0.701621	3.32121	2.56687	1.20981	1.80515	5.72806	0.356923	0.167246	0.749853	0.70433	0.949254	0.880595	0.85937	1.95569	0.808644	1.28709
2018-03-09	2.21758	0.448743	1.08602	2.85117	0.824343	1.37971	0.631371	1.42163	2.39431	1.62927	2.32661	0.630258	1.39648	0.183503	0.333909	0.46934	1.48256	0.804997	1.73083	0.786564	1.17012	0.767406	2.58155
2018-03-16	1.37765	0.824399	0.366135	0.81655	1.02941	0.641273	1.07251	1.12342	1.15639	2.64911	1.22143	1.2295	0.857665	0.289996	0.149488	0.798756	0.739498	0.423335	0.68181	0.868782	1.2755	0.508079	1.18767
2018-03-23	2.20911	0.870174	1.05794	1.89983	1.68335	0.230893	0	1.30174	1.68606	1.94026	1.84145	2.17191	1.8227	0.417149	0.245012	1.15108	0.847597	0.778024	1.15443	0.710932	1.11591	0.619114	0.93478
2018-03-30	1.70019	0.710292	1.67576	0.938571	0.753376	1.13206	12.721	1.05928	1.38287	1.0889	0.829938	0.359368	1.10788	0.370294	1.16977	0.827092	0.695571	0.621667	0.995398	0.414292	0.566157	0.735769	0.579729
2018-04-06	0.781491	0.480043	2.03868	2.35551	2.17128	0.48533	0	1.50538	1.00411	1.43498	1.59788	0.743006	1.29825	0.341739	0.330957	4.34278	1.10722	0.866996	1.10449	0.495823	1.16658	0.237668	1.5027
2018-04-13	1.36647	0.460421	0.674121	0.387927	0.587146	0.295655	0	0.994363	0.891163	2.0803	1.22669	1.50952	1.68678	0.525541	0.732513	0.856602	1.31642	1.07706	1.1479	0.680378	1.37178	1.7018	1.19391
2018-04-20	3.09041	1.08679	1.49332	0.588932	1.54015	1.31623	14.4249	0.383607	1.35587	2.2593	1.65314	1.40295	0.662136	0.66907	0.403387	1.75737	1.22863	0.503231	1.17648	1.27889	1.48002	1.44803	3.77491
2018-04-27	1.15453	0.896376	0.609229	2.52882	0.972122	1.28646	14.4249	0.96684	2.40489	1.75876	0.557439	0.830505	0.631379	0.522613	0.716507	1.49845	1.28161	0.60941	1.44013	0.536732	2.42026	0.707984	2.13547
2018-05-04	1.43434	1.18143	1.16709	0.622843	1.77221	0.992845	0	1.25163	2.15506	8.08704	1.39016	1.60286	1.12025	0.333294	0.0700612	1.83924	0.737513	0.557085	1.18999	0.501589	1.43686	1.28188	1.85985
2018-05-11	1.29875	0.569105	0.917518	1.05746	0.704695	1.8593	0	1.58107	1.43757	1.30166	2.30788	0.821506	1.10448	0.360115	0.319167	0.585522	1.06875	0.426252	0.59973	0.514834	0.6116	0.112413	0.829863
2018-05-18	2.34138	0.43459	1.52131	0.669921	1.68073	1.2665	0	1.27464	0.64782	2.18264	0.329892	0.890718	1.30196	0.396387	0.224559	0.74856	0.878289	0.867212	1.19262	0.719571	1.98187	1.04388	1.34566
2018-05-25	0.897355	1.18193	0.791249	1.26927	1.58369	0.46439	0	1.06315	1.15489	1.15645	2.05482	1.41303	1.62802	0.761537	0.196843	1.00057	1.10977	0.420914	1.00319	1.07682	1.90395	1.33014	1.12444
2018-06-01	1.54022	0.891442	0.705194	2.06356	1.67678	2.32278	0	0.592722	1.24396	1.54274	1.72484	1.46086	1.42339	1.01029	0.626907	0.743954	0.342089	0.305439	0.523026	0.312372	0.410775	2.60128	0.629598
2018-06-08	2.91894	0.688637	1.83554	2.17202	1.0203	1.60113	0	0.876508	3.46493	2.12972	1.48196	1.22033	1.23859	0.278105	0.289218	0.633482	0.761588	0.255241	0.782329	0.649477	2.18317	1.98554	1.05367
2018-06-15	2.19352	0.386929	2.76914	1.01127	1.47815	1.71711	0	1.00256	1.22748	2.85676	1.48111	1.89736	1.99512	0.234418	0.112887	1.8543	0.984683	0.959025	2.05231	0.917721	0.924788	2.73454	1.80538
2018-06-22	2.13939	0.391086	0.936274	1.73892	0.680152	1.70864	0	1.60632	0.978103	1.84195	2.37878	1.67042	1.39857	0.294362	0.579923	0.78108	0.935692	0.24549	0.489648	0.780061	0.274696	0.504827	1.90596
2018-06-29	2.38757	0.563674	1.57192	0.977287	2.79412	0.948546	0	0.926305	1.83796	2.48822	4.5225	1.01437	1.30865	0.444162	0.145708	1.60238	0.344322	0.230446	0.788248	0.398526	0.853811	0.235685	1.81082
2018-07-06	0.891296	1.67293	2.33897	0.832062	1.07112	1.71433	0	2.4883	1.1305	2.40074	0.950159	1.39821	1.21893	0.41238	0.206647	0.717934	0.453913	0.415411	1.02172	1.05539	0.976944	0.261019	1.12757
2018-07-13	1.20769	1.16545	1.69007	3.15756	1.23872	0.787928	9.38048	1.20295	0.659642	3.23028	2.43819	2.68009	2.36758	0.940653	0.197994	1.59847	1.90909	0.499604	1.05209	0.883246	1.37397	0.316508	1.94755
2018-07-20	1.8266	1.00971	0.758765	0.425259	1.06764	0.744536	0.654972	0.612183	1.06572	1.62438	2.22744	1.8346	2.42228	0.221636	0.228277	0.585778	1.07874	0.743132	1.0525	2.00687	1.28915	0.548862	1.69899
2018-07-27	1.92713	0.663569	1.21659	0.705177	0.50892	1.41758	0	0.584273	0.768093	3.12072	3.40263	0.707507	0.817614	0.383949	0.314061	0.793765	1.26394	0.243975	0.521267	0.839631	1.17432	1.04399	0.889799
2018-08-03	1.7133	0.994085	1.3438	1.0108	0.500987	1.56446	0	1.95855	1.83891	1.28289	2.20526	1.32988	1.08186	0.313114	0.432503	0.886722	1.33051	0.326044	0.64162	0.747746	0.253812	0.602575	2.06318
2018-08-10	1.55804	0.658192	1.5751	0.432359	2.92803	0.773124	0.584601	2.52341	0.828609	2.00429	1.77982	1.51253	2.32134	0.301306	0.461793	0.597424	0.871652	0.379414	0.657305	1.36901	1.74337	1.05426	1.15238
2018-08-17	0.686349	0.642117	1.17617	2.05741	1.66127	1.28639	0	1.83939	0.699631	2.3904	1.49084	0.868279	1.12833	0.208387	0.380491	0.617743	2.44433	0.878246	2.34601	1.76664	3.40905	2.42395	3.04597
2018-08-24	0.701457	1.36053	1.48099	1.03229	1.20093	0.56159	0	1.33989	0.767915	1.42774	0.456287	0.790697	1.10361	0.262786	0.522964	1.18289	1.09597	0.730639	1.09642	1.31438	1.75535	3.96423	1.11262
2018-08-31	1.71471	0.88523	1.99999	1.08973	1.69318	1.21988	0	1.36905	1.25256	3.20663	1.42504	0.734524	3.0014	0.0937798	0.514924	0.395377	0.894022	0.284743	0.577362	1.40189	1.57321	1.21695	2.08253
2018-09-07	0.600178	1.10457	1.28572	0.717153	0.356969	1.49979	0	0.791432	1.30994	0.910695	0.783814	0.452723	2.88123	0.327641	0.843303	0.574099	1.43033	0.430801	1.43681	1.66448	1.3777	2.59117	1.06166
2018-09-14	1.85813	1.09303	2.1165	1.54547	1.28413	1.2124	0.117843	1.3849	2.45321	2.88075	1.94016	1.19134	2.36065	0.318736	0.984308	1.21515	1.37354	0.535506	0.578866	1.94298	1.35087	0.64501	1.67374
2018-09-21	1.27002	1.5174	2.45511	1.64953	1.32186	1.67202	1.243	1.77869	2.11975	1.72731	0.99183	0.820509	1.08646	0.610307	0.348899	0.37371	2.27453	0.501275	0.444839	0.803269	1.52632	1.16947	2.89597
2018-09-28	1.9584	1.24204	1.76238	0.884811	0.932403	1.35123	0.336687	0.892567	2.69775	1.221	1.85337	1.06852	0.900494	0.42455	0.598363	0.693439	1.01209	0.721837	1.56884	0.704571	1.00547	1.5236	1.15411
2018-10-05	2.87313	1.32247	1.58326	0.844117	0.659932	0.55947	0.654679	1.10775	2.24506	1.50333	2.12014	1.63223	1.22866	0.16729	0.529937	0.248195	0.98359	0.799428	1.29644	0.778469	1.93385	2.24666	1.63019
2018-10-12	1.46957	1.40963	1.17344	1.00361	0.54874	1.20211	3.88174	0.895542	1.2283	1.26785	1.82105	1.42212	1.99557	0.622062	0.194232	0.270591	1.05733	1.43339	1.56087	1.0651	0.43008	2.92262	2.13921
2018-10-19	1.93559	1.48398	2.01359	0.441623	1.97519	0.388136	0	2.59698	1.72896	1.08298	1.70086	0.636156	2.10961	0.295956	0.345128	0.718187	1.0582	0.340646	0.527067	0.890143	0.587716	1.20971	0.920383
2018-10-26	2.00742	1.13842	1.44605	2.59438	0.702022	1.91309	0	0.680681	0.719987	4.44489	2.04968	2.13917	1.93608	0.387604	0.0418577	0.60495	0.755525	0.663261	0.833804	0.590533	2.21405	2.90422	1.00813
2018-11-02	1.37768	2.37095	0.995931	1.62022	1.6279	0.464948	0	2.15106	1.63191	1.14514	0.690678	0.7778	1.24571	0.206583	0.228379	0.287499	2.00723	0.886786	1.52984	1.08029	2.13445	2.24645	1.88256
2018-11-09	2.1545	1.50664	0.814384	1.52753	1.62727	0.388698	0	0.525748	0.977751	0.754018	0.65397	1.96501	1.36055	0.199028	0.512708	1.33107	0.828767	0.444599	0.927456	0.876773	0.908015	0.80408	1.28807
2018-11-16	1.28789	1.69889	0.695272	1.49032	0.695886	1.50118	0	0.346354	1.52688	17.8331	3.42432	1.94521	2.727	0.172964	0.119454	0.13649	0.587935	0.628184	0.769029	0.870787	1.90138	0.388251	0.611648
2018-11-23	0.575582	0.542125	0.456717	1.10608	2.11657	1.16774	0	1.14979	1.57291	0.86834	3.48967	2.24061	2.25665	0.575003	0.414949	0.775268	1.10113	0.234427	0.958959	0.431542	0.495629	0.775094	0.463496
2018-11-30	0.956363	1.84076	1.18952	0.895808	3.1092	1.74722	0	1.5294	1.83181	1.53264	3.04483	1.89384	2.99371	0.592944	0.195673	0.864919	0.91471	0.774047	0.935609	1.02416	1.72932	1.23799	1.30931
2018-12-07	2.42015	0.463282	0.978467	0.611855	0.850677	0.956826	0	0.749964	1.16061	0.673841	2.56623	1.70978	0.898776	0.25832	0.29791	0.54118	1.43002	0.478399	0.985159	0.584654	2.00042	0.933814	1.72612
2018-12-14	2.73712	1.0766	0.254597	0.357584	0.742746	1.00277	0	0.764458	0.735875	1.47358	2.70718	1.71186	3.00001	0.570788	0.26474	0.450691	0.897056	0.218532	0.845858	0.738827	1.75705	0.182091	1.15524
2018-12-21	1.46053	1.47877	1.43222	0.947813	1.18664	1.42637	0	0.882214	1.13936	1.40899	4.41047	1.90533	2.09803	0.462252	0.575864	0.716577	1.205	0.245304	0.574038	0.415745	1.78553	0.623446	0.906393
2018-12-28	1.50489	1.03995	0.782539	1.42874	0.265409	0.482479	0	0.741912	0.770601	0.358444	2.00941	1.67809	1.53023	0.261972	0.166158	0.983629	0.453411	0.490714	0.966777	0.341714	0.689995	0.498489	0.523813
2019-01-04	0.857614	0.968733	0.581945	0.931808	0	1.20028	0	0.587816	1.72726	0.972962	1.11577	1.22891	0.817789	1.07429	0.708914	0.282492	2.13043	0.355016	0.461133	0.906141	0.327531	0.739938	1.14364
2019-01-11	1.09136	0.735273	0.939342	1.59686	0	1.13864	0	1.24251	2.64796	0.831845	2.61507	1.57606	2.41652	0.246622	0.461414	0.77939	0.51969	0.29854	0.268286	1.29665	1.7789	0.283767	0.724477
2019-01-18	1.67734	1.20436	1.23953	0.790402	0	0.613827	0	1.26971	1.87157	0.727068	2.33809	1.47666	1.97453	0.357678	0.407028	0.481888	0.772423	0.371308	0.320962	0.885609	1.83167	1.04659	1.45412
2019-01-25	0.761452	1.02049	0.707069	0.979504	0	0.680522	0	0.628797	1.83561	0.72945	1.20683	0.490629	1.26405	0.392205	0.393077	0.310853	1.44576	0.573355	1.20671	1.13822	1.55155	1.04205	1.33643
2019-02-01	1.05422	1.84613	0.949369	0.599618	2.33027	1.49437	0	0.413826	1.67057	1.14648	2.57543	2.26105	3.34003	0.20408	0.388696	1.12195	1.01066	0.463618	0.666642	0.628714	1.31775	0.712412	1.39306
2019-02-08	1.30136	0.9561	0.650114	0.97866	1.09368	1.40723	0	0.572797	1.13331	1.40696	1.19981	0.59754	1.36358	0.16006	0.242484	0.576758	0.757851	0.203752	0.446768	0.915863	0.843749	1.31175	2.98698
2019-02-15	1.26609	0.805279	0.851077	1.69854	1.0904	0.955917	0	1.12601	2.2944	1.48665	1.01313	1.28153	2.28819	0.111383	0.335497	0.254734	0.782997	0.322501	0.466269	0.752227	1.14738	0.604902	1.21163
2019-02-22	0.953468	0.617563	1.02131	0.553419	1.98034	1.10006	0	0.652788	0.967343	2.15942	0.626152	0.852124	0.968442	0.298397	0.312475	0.938829	1.17103	0.812399	1.11177	0.909737	0.895682	0.572341	0.944737
2019-03-01	1.56238	1.43604	1.30235	1.40308	1.51567	1.04732	0	0.586476	1.1881	1.50824	2.35947	1.74419	3.56173	0.318343	0.547547	0.566249	0.310906	0.357326	0.800236	1.45262	1.42115	0.176906	0.568385
2019-03-08	2.61324	1.61793	1.18023	1.50306	0.697525	0.603673	0	0.806865	1.25151	1.78295	1.1426	0.468757	3.33539	0.288197	0.292856	0.600602	0.9283	0.827706	1.24236	0.755809	1.23664	0.150783	2.05884
2019-03-15	0.527122	0.71199	0.88154	1.30393	2.06319	2.42791	0	0.626594	0.39546	2.74035	1.09297	0.664315	1.29015	0.243145	0.60999	0.806977	0.855627	0.790276	1.08971	1.5924	0.705077	0.345517	1.66339
2019-03-22	1.31486	0.536941	0.611084	1.12625	1.16516	1.56594	0	0.780976	1.54008	1.06027	1.34697	1.00096	0.832925	0.676093	1.18492	0.472376	0.913362	0.381543	0.738837	1.72943	1.80812	0.397357	1.06459
2019-03-29	1.01741	0.706647	2.40637	0.342027	0.551837	1.95891	0	0.821326	0.550756	0.744721	1.21087	0.698895	1.82209	0.327785	3.01704	0.637694	0.822255	0.883515	1.08016	1.34723	4.85648	1.76699	0.901793
2019-04-05	0.697182	1.913	1.00228	0.691999	1.35981	1.93032	0	1.17636	1.4979	0.881671	1.21278	0.709813	2.37702	0.471436	2.80225	0.388512	0.810908	0.241299	0.329446	1.19313	1.9667	0.891566	1.11506
2019-04-12	1.00145	1.45361	0.605139	1.31839	1.18794	1.26971	0	0.429417	1.36949	0.840639	1.35582	0.739559	1.42948	0.243254	0.203722	1.14722	0.922606	0.606832	0.856532	1.15756	1.30808	1.4523	1.04378
2019-04-19	1.54182	1.60207	0.735765	2.10061	1.73128	2.19672	0	0.718811	1.9136	1.35675	0.640953	0.453641	0.777973	0.408799	0.358259	0.533296	0.801664	0.390179	0.166101	0.948018	0.794191	0.872418	0.68244
2019-04-26	1.945	0.508461	1.30244	1.01055	0.363804	1.63518	0	0.764004	0.767952	1.13641	2.08819	1.64805	1.67954	0.487155	0.473959	1.14783	0.963954	0.446523	0.931227	0.773615	1.22289	0.193826	1.15582
2019-05-03	1.2319	1.01196	0.822549	0.86362	3.40859	2.15668	0	0.537795	3.33415	1.44957	1.43316	0.920817	1.17976	1.15524	6.71047	0.219153	1.64382	0.791957	1.41597	1.33571	2.27536	0.834454	0.792308
2019-05-10	0.75259	1.47707	1.67039	1.08522	1.66051	2.75801	0	0.725001	1.13702	1.25234	1.05366	1.38179	2.02522	0.228269	0.185605	0.993133	0.530087	0.225014	0.272452	1.40993	2.47154	0.258755	1.05625
2019-05-17	1.26738	1.45424	1.49399	5.02106	0.967551	6.28757	0	2.15851	1.13046	1.80057	1.09013	1.76181	1.93093	0.775331	0.242414	1.04785	1.1319	0.643652	0.772217	1.00864	1.50505	1.80444	1.40924
2019-05-24	1.07366	1.24501	2.25391	1.49739	2.2181	1.96865	0	0.654869	1.01149	1.24125	3.09557	1.85028	2.00535	1.03573	0.349262	0.320765	0.672282	0.473193	0.580845	0.631629	1.15915	2.44119	1.91295
2019-05-31	0.433519	0.970816	2.99372	0.484677	0.698274	1.97946	0	1.82165	1.01293	3.05584	2.81246	1.95205	2.10654	0.973496	1.39407	0.906672	0.642959	0.525767	0.893777	0.589454	0.793829	1.17324	1.11086
2019-06-07	1.32991	2.1331	1.31216	2.23437	2.07989	2.98881	0	0.732567	1.11249	3.02875	2.45607	2.04595	3.29168	0.362557	0.13246	1.41937	0.702427	0.521897	0.411472	1.99672	1.25938	1.03224	0.30209
2019-06-14	1.19917	1.35283	1.68651	0.852726	1.55265	2.45523	1.48259	0.817904	0.621705	0.660167	2.39434	1.74979	3.00604	0.461496	0.147248	0.999505	0.817202	0.851177	1.12357	0.492276	1.3244	1.82116	0.935251
2019-06-21	1.45105	1.75816	1.70574	1.3437	1.37735	1.47161	0.617787	1.63237	0.546047	0.909807	2.80013	1.84213	2.28379	0.523588	0.393464	0.653757	0.913679	1.46633	1.35132	1.31231	1.48419	3.22956	1.54525
2019-06-28	0.314169	1.84801	2.20247	1.3169	1.60015	1.85826	0.637925	1.27651	2.12951	2.32092	1.56336	1.42665	2.02099	0.381291	0.359141	1.22357	0.846484	1.26141	0.835079	0.746378	0.70063	1.89341	0.808716
2019-07-05	1.34073	1.68598	2.26307	0.543175	1.56448	1.75814	0.896067	1.39291	0.994427	2.7928	2.73255	1.43323	0.912712	0.522931	1.75956	1.14215	0.710263	1.29083	1.00789	1.82666	0.810749	1.45116	2.04964
2019-07-12	2.18862	1.09216	1.49201	1.62205	0.944378	2.06003	0.473988	0.702994	0.80422	1.99423	2.05528	1.48128	2.00973	1.13773	0.452162	0.411791	1.18555	0.353257	0.356757	1.28197	1.14029	2.29392	1.09325
2019-07-19	1.44333	1.91281	1.57676	2.35485	0	2.66691	0.679032	1.29878	0.810315	1.85367	1.45924	1.22284	1.18584	0.564999	0.625973	0.462498	0.737178	0.351326	1.02459	1.42668	1.05372	1.29789	1.60515
2019-07-26	1.31449	0.761578	1.19909	0.474808	1.95077	1.43954	0.479838	0.772199	1.45388	2.45348	0.941558	0.699074	1.02995	1.02967	0.311846	0.332463	0.677995	0.165482	0.916128	1.08973	1.45627	1.37897	2.44138
2019-08-02	0.176127	1.12888	1.89455	3.0926	0	1.36647	0.866864	1.16317	0.651252	2.15991	4.92149	2.58351	2.82555	0.272834	1.15674	0.636725	1.44484	1.19193	1.03278	1.67465	2.87851	0.500635	1.02734
2019-08-09	0.551906	0.963678	0.919842	1.36681	0	1.93291	0.837905	0.938215	2.26273	1.64478	3.44869	1.61786	1.63577	0.112813	0.124511	0.633455	1.01126	0.86539	1.75875	1.04194	2.15787	2.21438	3.60272
2019-08-16	1.08074	1.67144	3.75391	2.20091	1.29509	1.61788	1.18072	1.49778	1.27716	2.58153	2.63273	1.97378	2.90476	0.529467	0.374835	3.949	0.973825	0.687734	0.817227	0.603708	0.637833	0.798523	0.827226
2019-08-23	0.85964	0.691589	1.48055	1.31182	1.97763	3.18163	10.4002	0.847957	1.00723	1.11415	1.77	1.27124	1.49576	1.06578	0.598896	1.1706	0.750836	1.06031	0.980793	0.700104	1.35065	1.58652	0.712591
2019-08-30	1.29318	1.12191	1.04339	1.04499	1.19917	2.9529	0.50276	0.837242	0.918708	1.61844	2.2498	1.24918	2.5785	0.321187	0.947715	0.378682	0.710655	0.294055	1.12592	1.95253	1.98631	0.617409	3.41259
2019-09-06	0.960367	1.19065	0.792987	0.951128	0.79216	2.46704	0.299141	1.05716	0.521898	0.957134	2.29097	2.56038	7.08055	0.313277	0.547848	1.4295	1.5036	1.14684	2.76377	2.56826	1.55743	1.06519	1.55899
2019-09-13	0.619612	1.25966	1.71865	2.22632	0.786136	1.49877	1.1401	1.62152	0.574352	1.19997	1.98238	1.26751	1.10169	0.536689	0.335945	1.98294	1.36144	1.01456	1.99398	1.34946	0.614801	2.02276	1.39121
2019-09-20	0.75211	1.43536	1.27271	1.45	0.448861	1.0989	0.363556	0.80254	1.37393	0.952944	7.70752	5.55307	5.20475	0.426846	0.358345	0.628886	0.765226	0.46343	0.942567	0.654763	1.1071	1.56892	1.61422
2019-09-27	0.815534	0.280088	0.567255	0.769951	1.09351	1.57496	0.714663	0.736009	1.2151	0.403516	1.44046	0.650965	1.53168	0.281856	0.64068	0.64555	0.68224	0.983207	2.75811	1.20007	1.56308	1.11556	0.941267
2019-10-04	1.31896	0.912711	2.44563	0.209108	0.856521	0.637581	1.92039	1.3703	1.81417	1.42952	1.55671	1.51233	1.7972	0.465063	1.82121	0.343592	0.241968	0.907465	1.63225	1.80582	0.715005	1.87853	0.922484
2019-10-11	1.7458	0.713283	3.1852	2.12404	0.438718	2.5869	1.26949	0.687708	0.757714	1.91301	1.17138	0.624398	0.938359	0.403409	0.329725	0.445446	1.0047	0.54189	0.805001	0.785141	1.41407	1.6276	1.05585
2019-10-18	1.63176	1.20392	0.724834	0.836357	1.08205	0.843586	1.00996	0.39166	1.20548	1.22244	1.44306	1.88503	0.95157	0.227828	0.716434	1.0025	0.851146	0.548339	1.03584	0.710784	1.17459	3.3178	3.20647
2019-10-25	0.508382	1.49994	0.400843	0.619515	1.70049	0.537098	0.70057	0.615791	0.731205	1.16432	1.48412	0.722878	1.2896	0.300212	0.700002	0.297659	0.558788	0.407462	0.792405	1.55662	0.70909	1.4629	1.3825
2019-11-01	1.33085	1.02619	0.907507	1.27458	1.14426	1.54051	0.226643	0.326841	1.06395	1.02897	2.20004	1.70066	1.54899	0.15974	0.563199	0.862475	1.08847	0.811601	0.660679	1.16887	0.474576	0.929162	0.906674
2019-11-08	1.17281	0.772257	0.677737	1.13565	1.91106	0.713099	0.478475	0.498158	1.21376	3.30204	1.17815	0.964269	2.17831	0.26026	0.660703	0.517485	0.955343	0.744079	1.64976	2.37208	1.32334	1.27978	0.95658
2019-11-15	2.00518	1.42511	0.640546	0.651357	0.606166	1.30322	1.04188	0.589914	0.879688	1.61427	0.96088	1.08395	1.36781	0.308781	0.700917	0.659225	0.57359	0.72056	0.706198	1.04865	1.79403	1.25594	1.62581
2019-11-22	0.368935	2.43274	1.42231	1.27508	2.06142	1.10157	0.487117	0.684695	0.956475	0.972971	2.863	2.34967	2.33156	0.143407	1.31467	0.727648	0.587875	0.263315	0.450285	1.42821	1.15786	1.84018	1.39479
2019-11-29	1.19563	1.38912	0.722788	0.869981	0.656094	0.871703	0.466197	0.308998	0.50015	1.47932	0.387074	0.809226	0.743334	0.201885	0.650417	0.621785	0.736875	0.413483	0.505022	0.92273	0.864983	0.769818	1.36809
2019-12-06	0.811065	1.74973	2.06855	1.49788	2.32881	0.995369	1.29614	0.94965	0.985828	1.70655	2.81297	2.01171	3.41737	0.334747	1.3068	0.655754	1.14261	0.817557	1.56151	1.28461	0.912231	2.39972	1.82466
2019-12-13	1.19716	2.17836	1.10918	1.23571	1.74784	1.29399	0.734649	0.684075	0.684794	0.968993	0.930435	1.32978	1.07997	0.431877	0.673057	0.781844	0.71705	0.347591	0.284302	1.39295	0.534885	0.32546	1.60487
2019-12-20	0.585148	3.03948	1.29342	0.713128	2.03713	1.30549	3.76357	0.733956	0.98304	1.67361	0.950312	0.935824	0.543988	0.222558	0.910348	0.416544	0.903287	0.087821	0.30896	0.472399	0.31924	2.02555	1.79207
2019-12-27	1.32949	1.49056	0.264551	0.455451	0.881388	1.42862	0.787128	0.624231	0.615754	0.926967	0.512808	0.35165	0.66791	1.65512	0.650744	0.442252	0.19673	0.508869	0.842693	1.58289	2.20183	1.21983	0.579233
2020-01-03	1.17967	1.12629	0.933337	0.409431	0.831095	0.866227	1.22741	1.08317	1.26237	0.333075	1.47012	1.00237	1.66532	0.797554	0.48112	0.577494	0.552122	0.517975	0.375259	1.02432	0.687943	0.575415	2.14326
2020-01-10	1.57727	1.55741	0.455207	0.678904	1.45427	0.966859	0.774092	0.305756	1.73159	0.812899	2.13333	1.15481	1.45424	0.319814	0.422194	1.15493	0.153218	0.938589	1.18934	1.53423	1.50451	1.60517	0.254549
2020-01-17	1.23991	1.34044	2.29424	1.13405	1.41665	0.960071	0.337294	0.752125	0.775416	1.04132	1.00416	0.894671	0.754954	0.194479	0.531108	1.33834	0.712885	0.47646	1.05361	1.84983	2.13026	2.34639	2.66683
2020-01-24	0.863478	1.14209	1.01691	2.22088	0.883931	0.91874	0	0.38938	0.706717	1.07382	1.23463	1.17444	1.53212	0.823566	0.599481	0.891097	0.691035	0.278899	0.931605	1.32733	2.83061	0.868128	1.64895
2020-01-31	1.61235	1.38139	1.29707	1.45485	2.05323	0.94202	0	0.732728	1.18269	0.485296	1.10777	2.56559	2.05003	0.765515	1.03043	0.719876	1.12935	0.614036	2.4153	1.01331	2.66367	1.01041	1.6269
2020-02-07	1.34704	1.5334	0.907638	0.755921	1.36094	0.844117	0	0.280604	0.937483	0.674402	2.0353	2.82537	2.40926	0.257754	0.681307	0.897869	1.44577	0.718817	1.20086	0.671135	3.41787	0.437396	1.84571
2020-02-14	0.87502	1.13111	0.674068	0.823198	1.32871	1.64109	0	0.477537	1.78317	0.927291	1.36751	1.79277	2.07304	0.192153	0.505663	1.58961	0.640111	0.481324	0.768962	0.481484	1.83292	2.00724	1.52207
2020-02-21	0.483091	2.00809	0.825009	0.73067	1.23761	1.25769	0	0.34411	1.31723	1.74802	1.15532	1.05914	1.63787	0.508417	0.377424	0.978622	0.753966	0.587504	0.73468	1.80576	4.44257	0.805014	1.16872
2020-02-28	1.15201	1.31324	0.778314	1.46761	0.597948	0.897279	0	1.05424	0.922203	2.49803	1.0548	2.14599	1.29358	0.659483	0.303666	1.37705	0.682535	2.11942	2.8416	2.03634	1.37023	1.03983	0.900605
2020-03-06	0.390395	2.64748	1.65418	1.76763	2.58883	1.94527	0	0.923522	0.994417	0.936204	5.67932	4.42343	4.79028	0.366007	0.241488	1.65563	0.876176	0.966225	1.51539	2.05581	4.19357	1.00942	1.82723
2020-03-13	2.38911	1.65815	1.42577	2.10992	1.69738	2.24339	0	1.19289	2.189	1.19752	14.1885	9.61415	12.0214	0.978761	0.264686	5.05969	1.02517	2.01351	3.54623	3.65048	7.0986	0.836875	3.29057
2020-03-20	1.55271	1.92085	3.00377	2.17789	1.77116	3.2266	0	2.25278	2.82638	2.22121	19.1511	6.54013	12.9972	1.78358	0.591553	4.00828	3.74547	2.23268	6.28384	6.45482	6.94955	3.85464	1.34085
2020-03-27	0.92187	3.13	1.00054	2.26745	1.80159	2.10093	0	1.18577	1.39336	2.40316	14.7975	2.45712	19.1639	1.39518	1.60218	4.30398	2.83219	2.46156	3.45836	3.68656	7.24198	0.778732	2.41502
2020-04-03	1.24834	1.9064	0.775591	8.86639	1.36632	1.83944	0	1.19944	2.44349	1.85957	18.503	6.84809	4.41977	1.34358	1.97803	2.89277	2.67666	1.07962	2.12555	1.70138	3.17854	0.530196	1.26901
2020-04-10	2.29974	0.761181	0.821912	1.8987	1.10914	3.51525	0	0.479402	0.598734	1.03148	6.99641	2.18056	11.6525	1.27964	2.55838	11.2583	1.4429	1.06101	2.02153	1.32816	1.68633	0.445402	0.710978
2020-04-17	2.50745	1.27671	0.91691	1.67641	1.00448	2.23347	0	0.20516	1.51008	1.08997	4.41911	3.51903	2.65594	0.803821	0.924017	3.45492	1.44394	1.43562	1.62574	1.86206	1.09721	0.688612	1.40249
2020-04-24	1.39868	1.54607	2.3103	2.96923	1.48576	0.556529	0	0.725048	1.34262	2.35402	29.5332	7.14824	15.3469	0.825277	1.1389	2.26234	1.92292	1.29386	2.40318	5.3982	7.90242	1.91442	2.50405
2020-05-01	1.05502	1.08436	2.14997	2.48607	1.85583	2.17607	4.96217	1.09748	4.80587	1.46111	20.2711	10.6496	4.88307	0.532539	16.1919	2.06874	1.2271	0.407651	1.125	1.15688	2.97735	1.28748	0.987401
2020-05-08	0.479986	0.861248	0.935059	3.3959	1.24677	1.36916	1.02015	1.20223	3.42955	0.766616	8.22597	9.03003	5.0102	0.456754	3.87505	3.72326	0.556005	0.721958	0.889711	1.37965	3.33845	0.722669	1.43789
2020-05-15	2.06792	1.43768	0.865429	1.8698	0.44108	2.14838	0.903878	0.755616	1.18092	1.13588	5.23827	6.34478	7.53896	0.194193	1.79385	1.97572	0.274815	0.81405	2.07682	1.10098	2.01398	0.336523	0.846172
2020-05-22	1.29761	0.585146	0.547288	1.71097	2.14943	1.57118	0.652029	0.769466	2.0972	1.66009	3.70676	5.97586	3.96815	0.467657	0.487306	1.22223	1.87749	0.769	1.95375	2.81463	5.95192	0.717981	2.86214
2020-05-29	1.42623	1.48324	1.01522	0.929512	0.990397	1.77208	0.619164	0.833938	1.03905	1.01257	4.30214	4.96076	3.52603	0.884547	0.303509	0.969519	1.38291	0.971747	1.10885	0.878821	0.750048	1.46057	1.16222
2020-06-05	1.50003	0.622053	1.05946	2.26146	2.61113	1.55904	0.888844	0.574892	1.07572	1.53199	2.42228	5.4879	3.25436	0.612852	1.3342	0.735366	1.22211	1.49819	2.08571	1.67095	1.5747	0.596875	1.31276
2020-06-12	1.87236	0.434798	1.31976	0.656773	2.89096	1.71655	0.520365	0.427061	1.51896	0.920082	4.20217	4.86725	4.19501	0.467712	0.811573	0.738546	1.76572	0.917397	1.09479	1.47901	2.50964	0.100686	1.44815
2020-06-19	2.1977	1.17072	0.424722	2.19189	1.49405	2.9063	0.560118	0.415793	1.27968	0.980894	1.58276	1.83892	1.93584	0.496348	0.553018	0.920354	0.956165	1.10743	1.43565	2.37683	2.19258	0.0368253	1.36269
2020-06-26	2.56176	1.21106	1.04043	1.05985	0.988461	1.14919	0.26537	0.174716	1.08064	1.31653	3.45019	2.73298	5.51328	0.375061	0.488656	1.53716	0.642842	0.602485	1.17759	0.951753	2.22134	0.0205952	1.37624
2020-07-03	0.951423	1.27787	11.8263	1.3642	2.60433	1.85253	1.27973	1.00715	1.52502	1.49868	1.54306	1.56004	1.83912	0.0938511	0.733726	1.96848	0.676209	0.80804	1.11409	1.17245	1.48983	0.38048	0.38292
2020-07-10	1.29118	1.79717	1.93043	0.664915	1.76134	1.34508	0.595763	0.654174	1.35265	1.84687	1.9929	1.21823	2.63896	1.05656	0.772028	0.772728	0.54732	0.612535	0.824625	1.89295	1.17589	2.47894	1.72488
2020-07-17	0.798659	1.35047	1.52903	1.0754	2.41897	2.47042	1.29032	0.905282	2.28449	2.82862	1.43637	2.03905	1.18848	0.373719	0.781008	0.940005	1.73147	0.19164	1.21706	1.68149	1.55152	0.875499	1.1832
2020-07-24	1.12783	2.48732	1.24623	1.24712	1.56381	2.19047	1.10726	0.490166	1.3756	1.68676	1.5835	1.86691	2.74506	0.534392	0.608918	1.07045	1.32165	0.468843	3.23135	0.630701	2.75037	1.2144	2.45434
2020-07-31	0.871364	0.979461	0.94555	1.86267	1.24578	1.61087	0.926205	0.716749	2.28638	1.3805	1.68896	1.8143	0.981582	0.546737	1.67994	1.01001	0.605056	1.16093	4.21972	2.93644	4.64214	0.281925	1.00636
2020-08-07	0.938559	1.69169	2.91043	2.42615	0.692636	2.02992	0.405966	0.979975	1.81191	1.22281	1.72948	1.78903	1.45912	0.297898	0.716966	0.527938	1.48812	1.27659	2.90117	2.36788	2.84041	1.88691	3.11527
2020-08-14	0.840035	1.61143	1.47954	1.29871	1.65797	2.0184	1.08093	0.72415	1.0325	0.694932	1.65344	0.7382	2.75301	0.364875	0.841301	0.715049	1.79002	1.91245	4.75629	2.17761	3.37975	1.41552	2.17186
2020-08-21	0.694743	1.24084	1.20015	0.682208	0.991572	1.65453	1.05199	0.941186	1.65389	1.77266	1.09445	1.71659	1.36278	0.306119	0.289123	0.634998	1.70841	1.36589	1.91452	1.50831	1.52928	0.911827	0.765658
2020-08-28	1.40225	0.853873	1.01572	1.25317	1.82917	1.49721	1.17789	0.746447	1.15599	1.46982	0.890115	2.46651	5.26483	0.370404	0.669989	1.57365	0.365017	1.45955	1.39222	1.81679	0.830195	1.55305	0.597722
2020-09-04	1.33916	1.63149	1.55317	0.861973	1.04745	1.47706	0.92605	0.379529	1.28132	2.74873	2.02796	2.18471	2.79648	0.327897	0.517932	0.129271	1.54592	0.887102	2.35516	2.58683	3.98319	4.38043	2.22356
2020-09-11	1.05904	1.26673	0.874869	0.966245	0.820673	1.53965	1.13736	0.834287	0.390284	0.775662	3.91434	3.35217	2.93068	0.236554	0.895882	0.712216	1.38172	0.606616	0.795511	0.980622	1.22623	1.49458	1.37392
2020-09-18	2.31119	2.86433	0.768624	1.27486	0.999478	0.659633	1.79144	1.2377	1.31333	1.72606	2.04029	1.76917	1.71929	0.526987	0.550135	0.852206	0.493941	0.688988	1.06589	2.37971	2.11998	2.65126	0.95998
2020-09-25	1.43278	1.13455	1.86273	0.587525	1.73983	1.03851	1.25829	0.913008	1.53149	1.53217	2.29764	1.99799	2.06563	0.258234	0.0896374	1.04553	1.68987	1.40069	4.10187	1.93512	0.685434	0.612287	1.14748
2020-10-02	0.976587	1.65301	2.2651	0.569213	1.88202	1.96015	1.80482	1.55607	2.22791	2.04472	3.19879	3.03573	2.93718	0.255764	0.299225	1.08974	2.71289	0.348143	1.71049	1.32007	1.531	3.50529	1.06849
2020-10-09	0.992856	0.96694	1.34544	0.613131	0.341267	1.23518	1.49954	0.993834	0.767271	1.51545	3.31753	2.75413	3.7167	0.302176	0.184691	0.407347	1.14002	1.2316	2.15392	1.45782	1.07284	1.52621	1.71445
2020-10-16	1.23525	0.849547	1.30781	1.16762	0	1.77322	2.05996	1.82668	1.43792	1.41702	2.11023	1.99034	1.40869	0.283942	0.233689	0.659496	0.53795	0.94181	1.97003	2.26981	2.13528	1.60475	1.18739
2020-10-23	1.52801	1.18726	0.65153	1.19705	0.589728	3.5288	1.15172	0.385337	1.23037	0.422128	2.26045	2.28271	2.26325	0.769907	0.333779	1.31601	1.26156	0.741951	1.42242	3.09496	1.50102	0.946961	1.22022
2020-10-30	1.36765	0.890061	1.57129	1.56377	1.64911	2.09714	1.15396	0.860852	1.21003	0.54746	3.05233	2.78425	2.8167	0.869322	0.598046	1.68457	0.62099	0.798784	1.97703	1.82538	2.43047	0.716043	1.48922
2020-11-06	1.45559	1.35109	0.870235	1.61274	1.3694	0.608567	1.31774	1.10503	2.31576	1.22861	3.33246	2.28147	2.05213	0.870751	0.81939	0.698229	0.447917	1.10751	1.86107	1.25595	2.59523	0.56485	1.11916
2020-11-13	1.06459	0.92056	3.17561	1.61661	0.736034	0.770773	1.08625	1.24895	1.39005	1.52134	4.07228	3.5338	3.61476	0.189868	0.556505	1.22006	0.654398	2.66428	3.80586	2.86542	2.06202	1.422	1.14465
2020-11-20	0.491084	2.48617	0.890136	1.5223	1.57153	1.53345	0.548421	0.585502	1.54167	0.539094	1.2125	1.15741	1.09752	0.274551	0.198807	1.23515	1.32734	0.680116	1.65163	0.974497	0.839343	0.88464	1.02254
2020-11-27	1.209	1.72356	0.86473	1.21402	0.422582	0.291188	0.288836	0.757019	0.675435	1.48636	1.72024	1.91076	1.84622	0.674385	0.21019	1.45489	1.27932	1.0753	1.77518	1.33742	0.671811	0.323961	1.50501
2020-12-04	0.810407	1.33855	1.26136	11.3565	1.71896	1.03341	0.71553	0.978849	0.918407	1.87943	1.34862	1.21533	1.9057	0.634519	0.286936	0.7339	0.779687	0.982726	2.23572	1.08657	1.49458	1.97594	2.21613
2020-12-11	1.28613	1.34689	0.972046	1.08107	0.779666	2.59475	0.766889	0.607641	2.00856	1.72619	1.50836	1.36725	1.23635	0.265852	0.269897	1.05212	1.27454	1.10329	1.53932	2.11707	1.22545	2.26024	2.04807
2020-12-18	1.20558	1.4339	0.39296	0.8995	0.987582	1.9302	1.74178	0.649553	1.61692	1.63386	0.316095	0.573913	0.984142	0.42184	0.826723	0.725175	0.553276	0.99765	1.7271	0.992818	1.04791	0.87169	1.01549
2020-12-25	0.797768	0.39568	0.573527	1.88837	0.213318	0.522554	0.789805	0.821666	0.719867	0.823479	1.78068	1.88955	2.21945	0.118743	0.691308	0.525844	1.22725	0.47144	2.0036	2.81426	0.994887	0.259237	2.10382
2021-01-01	1.80544	1.08334	0.886007	0.490101	1.10149	0.924352	1.41019	1.40107	0.627624	2.02071	0.900752	0.710831	1.12769	0.80229	0.742095	0.650809	0.725268	0.294766	0.865802	1.55756	0.361979	0.0197325	0.475972
2021-01-08	1.20672	1.16157	0.843512	0.957357	1.87476	1.3189	0.696066	1.18303	1.97758	1.19179	2.50558	2.84899	3.26856	0.590903	0.390895	1.14868	1.02143	2.28516	3.43894	2.83295	2.36556	0.790674	2.57181
2021-01-15	0.875267	1.36789	2.17569	1.00046	1.15672	1.82439	1.43447	1.67565	2.4606	2.04262	1.60046	1.93757	1.88157	0.48836	0.776662	1.20553	1.90229	0.708642	1.61895	5.2514	1.75069	0.683014	2.96684
2021-01-22	1.31432	0.712945	2.02951	0.316577	1.06611	1.0653	1.27609	2.00391	1.20086	1.79842	0.955486	0.727811	0.69523	0.273283	0.4667	0.63991	0.613239	0.697822	1.0236	2.18547	1.16542	0.722395	0.669323
2021-01-29	0.900688	0.742478	2.72158	1.03104	2.73862	1.37064	1.45772	2.22101	0.800618	2.01765	0.754361	0.633945	1.08559	0.226957	0.457787	0.695613	1.22217	0.325314	2.19473	2.28193	0.589246	0.285596	0.349189
2021-02-05	1.1284	1.04848	1.1324	3.72347	1.18488	1.61067	1.01148	0.757639	1.2713	1.14081	0.733683	1.09676	1.2191	0.188906	0.664504	1.07455	0.851549	1.36419	4.82383	2.04276	2.19513	1.57261	1.1964
2021-02-12	1.87686	0.34291	2.51584	4.9375	1.07709	0.982491	1.90186	2.05407	0.849566	1.52797	1.21326	1.20009	1.72243	0.0981143	1.09521	0.792896	0.774082	0.784939	1.33259	2.43435	1.3768	1.77946	0.831499
2021-02-19	1.64515	0.710676	1.55433	0.419881	0.762761	1.38805	0.826848	0.608738	0.824202	2.41204	1.54437	1.49604	2.48839	0.884598	0.486369	1.16326	1.83732	1.09235	1.27822	3.11392	1.03917	1.45909	1.10138
2021-02-26	1.1905	1.67313	0.81121	2.07788	1.44305	1.84879	0.738428	1.12727	2.55286	1.91957	2.73516	2.96126	1.56959	0.119192	0.486987	0.405419	2.17949	1.49892	2.91276	1.51531	3.54994	0.979287	2.0143
2021-03-05	1.63029	0.561694	2.36896	10.1321	1.44597	1.17419	0.599371	1.03221	2.47293	1.60768	2.72913	2.0404	2.02984	0.243659	0.710588	0.483147	1.30822	0.734457	2.48206	1.45623	0.456848	0.151471	4.47988
2021-03-12	0.645437	0.799579	1.35357	2.75548	2.10613	0.8188	0.920814	1.05952	1.61694	1.10834	1.70094	1.89023	2.54921	0.143984	0.118002	0.637214	1.76656	1.15137	1.5867	1.78386	1.46148	0.367585	1.1052
2021-03-19	1.07814	1.19212	1.65966	0.838372	0.959286	2.26715	1.32671	1.29104	0.911326	0.933581	3.64011	4.52349	2.07517	0.173066	0.214213	1.01632	1.29116	0.483461	0.809241	2.38679	3.84617	0.12011	1.00265
2021-03-26	1.04277	1.18394	1.30525	2.89658	1.3245	1.22322	1.25806	0.848622	1.65498	1.19049	5.19241	4.61002	3.76944	0.54159	0.459007	0.427196	1.65196	0.441296	1.10281	0.819866	0.662333	0.2775	1.31258
2021-04-02	1.51186	1.1963	2.5224	1.82893	1.63776	0.258903	2.79643	2.9426	0.574302	1.81856	2.33478	1.68986	1.62822	0.384156	0.342675	0.315844	0.662035	1.34352	1.6329	1.79102	1.70199	2.13264	1.12394
2021-04-09	0.578126	1.14808	1.69415	1.02154	0.964404	0.692978	1.41958	0.843573	0.748033	0.910904	2.20189	1.70488	1.61697	0.483046	0.162896	1.18242	1.75103	0.699194	1.03203	1.64141	0.835274	2.26066	1.73609
2021-04-16	0.600714	1.34444	1.75175	2.54165	1.05279	1.16386	0.935086	1.15887	1.27144	1.57822	2.0256	1.59349	1.09601	0.544937	0.125343	0.540439	1.48756	0.91481	1.64853	1.35208	0.93715	0.687645	1.61198
2021-04-23	1.28678	0.595871	1.69393	1.31802	0.588905	1.50835	0.872744	0.753196	1.80478	2.16069	1.27641	1.18788	1.4448	0.394828	0.120114	0.519858	1.15181	0.571067	1.35224	2.24841	1.51168	2.3455	1.44678
2021-04-30	1.91535	1.65403	3.56583	2.62377	1.39042	0.653857	0.977222	1.86179	2.76312	2.04096	1.74436	1.74828	1.87285	0.471953	0.233434	1.06073	0.972679	0.226202	0.865275	1.29603	0.42785	1.38014	1.46215
2021-05-07	1.51012	2.71496	0.709507	1.99638	0.882947	2.25482	2.02517	1.11018	1.87579	1.63387	1.32446	1.36374	1.55174	0.341058	0.203084	1.97835	1.35055	1.01824	2.51615	1.69971	1.22464	1.31531	0.567732
2021-05-14	1.42379	0.953168	2.90847	1.74927	2.01378	1.31306	2.35761	2.28067	2.41986	2.6503	2.09507	2.47479	2.31013	0.618638	0.262348	1.07474	0.721406	0.540268	1.00655	2.66552	2.99946	0.592229	1.71853
2021-05-21	1.41059	1.96221	1.00259	1.39537	1.93784	2.15014	0.703596	0.832333	1.41886	0.842407	2.50669	2.19574	2.61426	0.446211	0.25034	0.212568	2.08874	0.707881	1.73503	0.88814	0.968021	0.267092	2.20171
2021-05-28	0.880811	1.79865	4.20298	0.323336	1.23529	0.788345	1.45116	1.18628	1.20451	2.52949	1.79663	1.43408	1.12532	0.292123	0.18646	0.604322	1.00019	0.521905	0.632446	1.501	1.49194	0.523136	1.4124
2021-06-04	0.392858	1.36472	3.13019	1.3737	1.3924	0.36007	0.918073	1.20173	1.32301	2.35067	0.953958	0.913922	0.644607	1.05807	0.586612	1.2588	1.95656	1.09899	1.73547	1.147	1.14403	0.0447459	1.05592
2021-06-11	1.0847	0.775037	1.76983	1.40962	2.30373	2.93647	1.07431	1.39915	1.19948	0.693149	0.785246	1.02467	1.18742	0.353744	0.132736	0.626446	0.831185	0.18991	0.704948	1.08562	1.01893	0.000175957	0.746247
2021-06-18	2.0976	1.45609	3.87218	1.54629	2.36228	1.83898	2.28459	4.89533	1.13377	2.67996	1.09552	1.0428	1.0624	0.296675	0.689054	1.52882	2.18587	1.93957	3.10678	2.08302	2.86768	0.0209893	2.1795
2021-06-25	0.862779	1.04868	1.34491	0.643109	1.38463	0.249175	1.12484	1.23048	1.67879	1.37041	1.33317	1.83057	1.28973	1.21219	0.749716	1.6124	1.02405	0.406543	0.927283	2.21045	1.28947	1.21845	0.513567
2021-07-02	0.639586	1.99635	3.23413	1.86157	1.32907	2.20177	3.13289	2.92224	1.21879	3.01579	1.46174	1.19931	1.57981	0.369347	0.393618	0.664459	0.546231	0.791495	1.02217	2.0439	1.20868	2.56297	1.00783
2021-07-09	1.1319	1.29141	3.95896	0.633898	1.75598	2.55438	2.87942	2.25326	0.379912	1.72685	1.91411	2.10684	2.21527	1.54758	0.366974	0.255491	1.92242	0.395538	0.671867	1.50208	1.59829	0.0122328	1.766
2021-07-16	1.87349	0.509457	1.59565	1.06899	0.990677	2.30333	1.55788	0.996599	1.62343	1.85761	1.69863	1.63593	1.29524	0.205855	0.106888	0.576494	1.0812	0.473981	1.08116	1.08625	1.58793	0.00934771	1.05961
2021-07-23	1.6526	4.95919	1.90705	2.46305	2.31369	1.81905	1.6407	1.09651	2.43258	1.97409	4.63783	3.86989	3.71608	0.49645	0.0535819	1.10533	1.40541	0.250067	1.3335	2.08265	2.47219	7.91e-06	2.26916
2021-07-30	1.6052	5.26241	1.09551	0.673335	0.90315	2.23409	1.24939	1.18971	1.41343	1.82172	0.921971	1.03619	1.03041	0.464967	0.0958148	0.886056	1.76877	0.727859	2.34927	1.98634	1.67255	0.00613352	1.69704
2021-08-06	1.00718	1.46255	2.4799	0.47816	1.52312	2.30992	1.27863	1.61749	1.4442	2.09867	2.05482	1.84895	2.20111	0.305148	0.543829	0.849275	0.713012	0.857242	1.56028	2.13367	0.765764	0.00613488	0.948811
2021-08-13	0.782839	1.55741	1.19547	1.68373	1.89511	2.18838	0.581957	0.985632	2.33184	1.76492	2.03232	1.67998	1.38123	0.131813	0.0721853	0.616896	1.13071	1.38566	2.26342	1.49071	1.04833	0.524747	2.19082
2021-08-20	1.27325	1.14785	1.16082	1.22914	2.83797	2.54527	0.855888	1.11568	1.01838	1.58852	0.545967	1.42409	0.800901	0.263856	0.47845	0.41672	1.58429	0.384407	0.33539	1.3913	2.12426	0.398367	1.16379
2021-08-27	0.614344	0.852639	1.23085	0.770188	1.62231	1.63887	1.51904	1.88496	0.782213	1.47396	2.50741	2.90189	2.79539	0.301179	0.719468	1.16896	1.30486	0.814842	1.25908	1.72162	3.06066	0	1.63958
2021-09-03	1.40093	1.44775	2.5149	1.29913	1.39331	3.44547	0.738985	1.42192	1.1648	1.03506	1.35268	1.10862	1.31846	0.282611	0.687371	0.963889	1.22595	0.530022	1.93229	0.939668	1.89852	0.58716	1.49514
2021-09-10	1.13282	1.03979	1.68868	0.542782	0.46346	2.39935	0.605613	1.11606	0.762711	1.22692	1.6341	1.31364	1.61146	0.554134	0.248935	0.410684	1.9025	0.718766	0.873735	0.999797	1.75643	3.24284	1.32852
2021-09-17	0.251348	0.643607	2.03674	0.74549	2.71865	1.43625	0.56094	0.683984	1.67204	2.85401	1.41416	0.947147	0.597093	0.363344	0.532935	1.3506	1.72034	1.03906	1.75596	1.35307	3.96318	1.28883	2.21385
2021-09-24	1.58075	1.38488	1.88636	2.82472	2.88905	1.6869	0.369602	0.957933	1.58325	0	1.86234	1.51959	1.68712	0.400738	0.393661	0.436414	2.29466	0.95098	1.37799	3.03047	3.05837	1.22924	1.46664
2021-10-01	1.35458	2.3593	1.59421	1.87493	2.35386	1.88074	1.60502	1.115	2.27004	0	0.938389	1.05713	1.09682	0.34583	0.336213	0.36047	1.74933	0.951187	2.72813	1.43561	1.22548	0.188448	1.05292
2021-10-08	0.960342	2.05459	0.955511	1.82861	1.18495	2.00907	0.563739	0.824405	1.36893	0	1.64704	2.05699	1.76623	0.479717	0.39492	0.520014	1.63481	0.380348	0.407936	2.59358	3.90999	1.74297	2.20755
2021-10-15	1.14386	1.65964	1.66639	2.74974	3.20121	1.64638	0.678047	1.93461	1.00792	0	0.646613	1.30707	1.21594	0.337638	0.302358	0.672003	1.93219	1.06581	1.38555	1.6583	3.6056	1.63869	1.94491
2021-10-22	1.21069	0.882756	1.38662	2.79028	1.5057	2.65804	1.07212	1.24029	1.24442	0	1.64885	1.15761	1.21326	0.327347	0.414437	0.313345	5.37732	0.706142	1.41299	1.07331	4.21684	0.00806954	3.39027
2021-10-29	0.730959	2.24972	0.892542	1.1498	1.70635	0.998297	0.333943	0.649782	1.2568	0	1.89804	1.36838	1.70094	0.537384	0.33421	0.998037	2.14967	0.824639	1.20392	1.11407	1.77762	4.24201	2.32594
2021-11-05	0.969824	1.6472	2.38975	2.83042	2.08133	1.5291	1.1801	1.31586	0.79156	0	2.63497	2.38067	3.06343	0.215585	0.55607	0.936384	1.63082	1.21097	1.80808	3.12829	2.57357	6.25e-06	1.53277
2021-11-12	0.992649	2.41254	1.22766	1.37446	2.22981	1.63627	2.36789	1.47832	1.38763	0	2.25472	1.6399	1.90304	0.224519	0.572172	0.280691	1.2275	0.65986	1.51473	1.54443	1.39791	0.908099	1.17887
2021-11-19	0.501547	1.97461	0.669846	1.34911	1.10839	2.02386	2.04081	1.2132	1.36325	0	1.98693	2.43512	2.29484	0.176138	1.05475	0.369988	1.83781	0.113508	0.533978	1.89682	2.87373	0.908479	1.66934
2021-11-26	1.2777	1.73009	0.620289	1.55923	1.95357	1.97617	0.713708	0.747307	1.27746	0	0.893638	1.55806	1.86723	1.04562	0.795924	0.341668	1.71178	1.33025	1.97	2.0153	1.73156	0.00929372	2.39638
2021-12-03	1.69149	2.15205	1.09706	2.08099	2.39427	1.44221	1.35433	1.66782	1.28506	0	5.24332	5.17677	5.54968	0.571219	0.665374	1.03955	1.15952	0.71654	0.70935	1.22204	2.8411	2.22597	0.879281
2021-12-10	0.381816	1.95398	0.613177	1.34938	2.33721	1.58573	2.17122	0.656356	1.14024	0	2.64667	2.16425	2.41014	0.190888	0.451314	0.464986	0.806016	0.21473	1.17631	0.855972	2.77755	2.02543	1.38791
2021-12-17	1.44787	0.71469	0.798979	2.22004	1.05199	2.82361	0.992491	1.26135	1.03973	0	1.51942	1.31097	1.28354	0.174914	0.385068	0.872783	2.01218	0.926627	2.32924	1.74754	6.13303	0.019916	1.722
2021-12-24	1.33127	2.37897	0.577869	1.39007	2.27555	1.78747	1.00988	0.664149	1.75844	0	2.58299	1.47185	2.05762	0.100129	0.514693	0.421963	0.624444	0.527649	0.718556	1.2648	2.8245	1.25182	1.29532
2021-12-31	0.68883	1.05423	1.25781	2.71384	2.53597	1.66561	0.601749	1.60898	1.08651	0	1.48891	1.36223	1.31525	0.889706	0.581991	0.578581	0.591732	0.412434	0.988416	0.404788	1.42263	2.20132	0.711962
2022-01-07	2.0164	1.68938	1.81785	1.5042	1.35669	1.26826	1.43178	1.15582	0.729412	8.95175	0.978305	0.567139	0.674679	0.811892	0.833446	0.936306	1.24828	1.11625	2.14064	1.49589	2.6664	1.19464	1.83421
2022-01-14	1.14365	1.10081	1.26012	1.22999	0.741877	1.99613	1.37	1.03086	1.35345	1.43229	2.06935	1.4404	1.94929	0.117938	0.893414	0.52734	2.43302	0.491809	1.10472	2.50925	1.16899	0.00486128	1.90085
2022-01-21	1.11075	1.31633	0.691641	2.00109	3.47597	1.07384	1.67676	1.67323	1.02716	2.18871	1.40817	1.42088	0.713904	0.128346	0.575494	0.645013	1.11786	0.759261	1.6792	2.15892	1.38842	0.743391	2.18011
2022-01-28	1.9139	1.64961	0.946069	0.943342	1.9186	3.50501	1.36891	1.02089	0.430408	2.50648	1.557	2.28946	1.45363	0.283196	0.629383	1.27168	1.79211	1.02013	1.98836	2.583	2.55677	2.75708	3.2652
2022-02-04	1.02178	0.747557	1.53782	1.6967	1.60659	1.65655	1.51107	0.933549	1.39605	1.59672	1.50997	1.76691	0.596995	0.222639	0.756867	0.678977	0.827952	0.384388	0.970197	1.56176	3.39426	0.589656	0.797774
2022-02-11	1.46333	1.72625	1.51288	0.887721	1.03378	2.08862	1.43132	1.47061	0.928804	2.50671	2.15591	2.18546	2.00407	0.305523	0.493191	0.767666	2.71935	0.388825	1.64341	0.713933	2.06514	0.845337	2.41745
2022-02-18	1.41811	1.26119	1.91097	0.849718	1.16611	1.04558	1.38896	1.35396	0.741632	1.66031	2.65089	2.0373	2.45589	0.145598	0.631907	0.409237	0.50897	1.1707	1.55853	2.22093	2.33126	0.533107	0.663727
2022-02-25	3.67295	1.87507	3.2453	0.963622	1.56984	0.640779	2.17263	2.74715	0.97499	6.11308	0.818478	1.52075	1.28391	0.336674	1.29067	0.953646	0.386381	1.11312	1.9063	2.18278	8.84245	0.664591	1.17415
2022-03-04	1.61965	1.24506	2.76005	2.78656	4.22749	2.29812	2.08657	2.31869	0.87096	4.71376	4.30913	4.43983	5.2491	0.385935	0.344969	0.717106	1.11147	0.797406	1.6731	0.900398	4.8037	1.67313	2.6936
2022-03-11	0.845635	1.86432	2.04488	1.66526	1.60196	3.69022	3.15759	0.918767	1.17058	5.37042	6.99199	13.5295	6.8278	0.282197	0.449414	0.884354	2.19447	2.38009	3.16206	3.11514	2.71193	0.376583	22.7435
2022-03-18	1.63821	2.12407	2.96685	2.1899	1.52531	0.510673	1.39021	0.784051	1.30586	4.92831	6.09274	7.78571	5.73975	0.244347	0.392086	0.925896	1.86606	1.32627	2.3181	1.93228	7.58331	0.0190724	5.48257
2022-03-25	1.70416	1.24212	1.3969	1.6468	2.25733	1.54669	0.773333	0.924351	0.944091	2.32495	3.22269	3.78579	3.08327	0.157621	0.530287	0.402609	1.12688	0.95633	1.78333	0.875755	1.00984	0.0077756	14.0657

## Sheet: Uncertainty（市场不确定性）
市场不确定性	Cocoa	Coffee	Corn	Cotton	Oats	Orange juice	Soybean meals	Soybeans	Sugar	Wheat	WTI oil	Gasoline	Heating oil	Feeder cattle	Lean hog	Live cattle	Copper	Gold	Silver	Platinum	Palladium	Aluminum	Nickel
2011-01-07
2011-01-14	1.29369	0.714885	0.697711	0.851279	0.66446	0.759893	1.09265	0.769059	1.08427	0.648934	0.559807	0.403758	0.343926	0.63331	0.224625	0.476486	0.694379	0.475082	0.429354	0.47274	0.678574	0.681168	0.576662
2011-01-21	1.36976	0.776239	0.646869	0.817319	0.869634	0.768689	0.413507	0.628297	0.995221	0.77805	0.601322	0.361194	0.336958	0.515133	0.210801	0.434298	0.685769	0.440554	0.45528	0.466022	0.761522	0.570895	0.626397
2011-01-28	1.32624	0.818947	0.724429	0.725611	0.621615	0.655288	0.310899	0.520483	1.16098	0.708113	0.567987	0.379979	0.364003	0.531945	0.37633	0.456319	0.707932	0.420228	0.524609	0.495627	0.963121	0.527387	0.678412
2011-02-04	1.29019	0.835742	0.815316	0.734446	0.811467	0.584775	0.584321	0.506841	1.6354	0.489039	0.566575	0.387963	0.320871	0.523975	0.470709	0.45495	0.738601	0.431376	0.574556	0.498498	0.98719	0.522138	0.621772
2011-02-11	1.26668	0.892744	0.622596	1.11014	0.834018	0.704118	0.373903	0.68719	1.21933	0.606967	0.614507	0.413748	0.348811	0.595164	0.362666	0.469781	0.84394	0.484785	0.603904	0.508813	0.53498	0.588658	0.661112
2011-02-18	1.27275	0.944323	0.568014	1.0629	0.701034	0.819388	1.14322	0.887439	1.07766	0.718229	0.720924	0.53832	0.411329	0.614082	0.479797	0.510078	0.976013	0.526065	0.637235	0.514911	0.515437	0.673998	0.795688
2011-02-25	1.30926	1.01188	0.691244	1.12772	0.694121	1.07255	0.465273	0.689569	1.29728	0.622456	0.755481	0.648797	0.484534	0.652381	0.419325	0.489919	1.01748	0.604676	0.700077	0.524137	0.977418	0.733165	0.80461
2011-03-04	1.33614	1.08305	0.593455	0.952463	0.797788	0.799448	0.429454	0.738227	1.44571	0.626983	0.697809	0.572591	0.447038	0.539014	0.309077	0.48136	1.04377	0.583771	0.703064	0.523576	0.42951	0.778264	0.764458
2011-03-11	1.39208	1.10056	0.743673	0.764029	0.682536	0.744622	0.543117	1.36125	1.45399	0.848591	0.641127	0.645556	0.423573	0.526863	0.369078	0.470687	0.953003	0.619303	0.741476	0.536256	0.483738	0.68004	0.735493
2011-03-18	1.44002	1.04537	0.914824	0.655347	0.823134	0.821362	1.30071	0.80079	1.42602	0.623285	0.597651	0.668091	0.400713	0.713383	0.472996	0.494193	0.861544	0.605986	0.695524	0.549205	0.69052	0.659783	0.696429
2011-03-25	1.40769	1.05602	0.862451	0.916136	0.599929	0.490762	0.368218	0.617712	1.39682	0.600434	0.496561	0.519938	0.323	0.554444	0.445808	0.425959	0.763525	0.515927	0.587456	0.524209	0.461004	0.662184	0.626077
2011-04-01	1.353	1.10025	1.38363	0.764777	0.776686	0.436847	1.04861	0.714311	1.79002	0.761457	0.458081	0.507027	0.293422	0.556262	0.439302	0.392509	0.716393	0.484468	0.555971	0.521617	0.368495	0.759304	0.612202
2011-04-08	1.26682	1.07223	0.576631	1.02684	0.971844	0.615121	0.874222	0.661292	1.35164	0.645935	0.446533	0.463283	0.317032	0.622701	0.403831	0.379426	0.728919	0.494757	0.524	0.531938	1.19019	0.735633	0.637517
2011-04-15	1.21378	1.032	0.676643	0.832467	0.782518	0.63797	0.525213	0.544354	0.948615	0.638025	0.45611	0.495042	0.359283	0.546746	0.495392	0.440501	0.805641	0.519757	0.508535	0.533749	0.856147	0.698151	0.750926
2011-04-22	1.1772	1.01771	0.754684	0.769994	0.710913	0.609309	0.277035	0.681417	0.831696	0.546996	0.509078	0.509285	0.412424	0.613129	0.429448	0.470066	0.785171	0.624774	0.491011	0.557703	0.469226	0.613984	0.94629
2011-04-29	1.15568	1.00473	0.971941	0.813606	1.23992	0.664923	0.611774	0.65575	0.843663	0.721871	0.583218	0.587095	0.391656	0.555677	0.608794	0.445964	0.814645	0.705231	0.500681	0.612627	0.438813	0.645167	1.23936
2011-05-06	1.13644	0.966275	0.950757	0.891401	0.937514	0.776513	0.327451	0.673604	0.898563	1.0329	0.517799	0.60705	0.371024	0.587796	0.512767	0.463715	0.707314	0.661844	0.451131	0.627805	0.681374	0.753173	1.27087
2011-05-13	1.11153	0.938746	0.748245	0.977215	0.971684	0.980015	0.442473	0.676205	0.973384	0.764429	0.54725	0.565756	0.361658	0.719746	0.433748	0.584213	0.712906	0.588011	0.396799	0.580868	0.90749	0.707817	1.05443
2011-05-20	1.09214	0.93212	0.652983	0.72345	0.664332	0.810389	0.288906	0.52888	1.12347	0.519924	0.546533	0.513961	0.38983	0.704311	0.419226	0.513616	0.731119	0.559474	0.369297	0.534685	0.607684	0.799084	0.877785
2011-05-27	1.09142	0.904559	0.543295	0.918615	0.851689	0.544975	0.359934	0.569426	0.969105	0.63765	0.565847	0.547061	0.322516	0.988005	0.404063	0.514972	0.672305	0.522216	0.385082	0.48987	0.408402	0.654394	0.775253
2011-06-03	1.0852	0.935307	0.797441	0.944415	0.698338	0.676689	0.280894	0.63997	1.05702	0.530674	0.607711	0.490437	0.337068	0.694534	0.385762	0.566005	0.683331	0.516528	0.438744	0.471782	0.403066	0.549945	0.761175
2011-06-10	1.09641	0.902645	0.833668	0.894827	0.816521	0.699778	0.507442	0.562101	0.994113	0.492465	0.571436	0.400722	0.355243	0.470155	0.453652	0.571081	0.721374	0.498111	0.465158	0.438502	0.460283	0.465169	0.679887
2011-06-17	1.09899	0.924735	0.807742	0.897042	0.846381	0.826204	0.585939	0.463192	1.22946	0.766124	0.57073	0.404369	0.491499	0.652384	0.871847	0.551694	0.722533	0.473309	0.459143	0.403559	0.565936	0.437866	0.61517
2011-06-24	1.10222	0.938564	0.893337	0.673422	0.74773	0.904539	0.346234	0.487522	0.982892	0.790506	0.574944	0.470147	0.499356	0.97697	0.564914	0.541611	0.73335	0.514944	0.417153	0.382627	0.387997	0.475991	0.572889
2011-07-01	1.10239	0.931188	1.01969	0.528736	0.770082	0.581931	0.623872	0.832548	0.983484	0.851765	0.536049	0.441387	0.347283	0.541021	0.316499	0.456848	0.678177	0.546191	0.403261	0.376949	1.37353	0.464777	0.549657
2011-07-08	1.10088	0.916084	0.767915	0.67559	0.82791	0.685567	0.446417	0.703508	1.20104	0.775887	0.536458	0.478325	0.351316	0.711416	0.361438	0.523559	0.677926	0.581299	0.405348	0.363115	1.02842	0.51074	0.562697
2011-07-15	1.08574	0.903793	0.724776	1.07093	0.835845	0.62934	0.634388	0.7326	1.12992	2.06703	0.568905	0.556472	0.350765	0.886309	0.464172	0.562789	0.679327	0.5716	0.410309	0.371195	0.459873	0.531269	0.592667
2011-07-22	1.06181	0.847927	0.550583	0.763067	0.709245	0.668632	0.538952	0.514882	1.14496	0.874933	0.543486	0.450854	0.322281	0.853743	0.484183	0.480398	0.701471	0.611432	0.456197	0.384542	1.03286	0.537005	0.568358
2011-07-29	1.03619	0.798116	0.573117	0.717319	0.713143	0.636105	0.28753	0.405227	1.08341	0.576489	0.549928	0.507974	0.308342	0.676525	0.58278	0.416932	0.813963	0.730657	0.569746	0.421698	0.450656	0.755751	0.657271
2011-08-05	1.02121	0.787708	0.52679	0.816094	0.773613	1.45563	0.291977	0.470234	0.901325	0.767683	0.631757	0.594618	0.355938	0.517282	0.610029	0.42928	0.971312	0.987109	0.66454	0.466396	0.900564	0.964804	0.826603
2011-08-12	1.02633	0.814236	0.436536	1.09795	0.566378	1.03823	0.557238	0.522209	0.937452	0.489139	0.612087	0.402938	0.300862	0.888242	0.393788	0.421011	1.03277	1.10443	0.732217	0.475261	0.589269	0.805755	0.787894
2011-08-19	1.03279	0.842404	0.566851	0.833849	0.616662	0.604432	0.39061	0.584381	1.29387	1.86812	0.582487	0.42216	0.295616	0.806821	0.435551	0.42892	1.01472	1.15369	0.779112	0.464493	0.473906	0.818372	0.829833
2011-08-26	1.00814	0.842281	0.599892	0.734469	0.897134	0.742578	0.498626	0.59666	0.864199	0.697614	0.578231	0.509255	0.282019	0.600492	0.648442	0.399911	0.94916	1.17977	0.672271	0.461609	0.533911	0.790832	0.773823
2011-09-02	0.981571	0.897406	0.95441	0.701751	0.762492	0.678281	0.565428	0.915609	0.768204	0.644869	0.546106	0.676279	0.359665	0.56144	0.672615	0.432928	0.929581	1.09305	0.623681	0.46729	0.790776	0.897888	0.721387
2011-09-09	0.9607	0.985257	0.769099	0.893191	0.810614	0.646535	0.277241	1.03576	0.877969	0.52841	0.581946	0.568497	0.436484	0.585176	0.521405	0.473363	0.971639	0.942437	0.616714	0.489645	0.739272	1.05071	0.690744
2011-09-16	0.944739	0.953546	0.566906	0.759711	0.644856	0.661709	0.545721	0.625971	1.3546	0.513908	0.606941	0.451423	0.473291	0.506379	0.534545	0.501479	1.01932	0.781122	0.723034	0.528029	0.528364	0.892415	0.734475
2011-09-23	0.940872	0.969941	0.619752	0.965859	0.937829	1.35108	0.946921	0.70083	1.17682	0.809436	0.648738	0.465029	0.594318	0.486411	0.431909	0.606243	1.0781	0.771299	0.971453	0.575116	1.29048	0.882737	0.975005
2011-09-30	0.942345	0.99821	0.866287	0.879005	0.65296	0.603751	0.589443	0.801205	1.39613	0.772983	0.681585	0.559329	0.565333	0.611659	0.437779	0.629914	1.07613	0.812347	0.91131	0.541705	0.975501	1.1551	0.800954
2011-10-07	0.934596	1.09365	0.603733	0.59226	0.630228	0.698859	0.490172	0.759169	1.18939	0.724136	0.630277	0.767416	0.488022	0.65126	0.32512	0.603821	1.18675	0.685235	0.824514	0.522232	0.850071	0.966687	0.70535
2011-10-14	0.933843	1.14372	0.714436	0.71388	0.72797	0.919761	0.525387	0.782948	1.07366	0.733114	0.594429	0.716261	0.520109	0.510701	0.260175	0.582225	1.31922	0.680088	0.720998	0.498846	0.720663	0.880612	0.689204
2011-10-21	0.95562	1.15312	0.852465	0.677764	0.682009	0.722386	0.27786	0.888459	0.897391	0.572234	0.562025	0.750281	0.684858	0.632756	0.327783	0.53581	1.49441	0.765811	0.627545	0.484642	0.774686	0.953104	0.701344
2011-10-28	0.990297	1.03091	0.583735	0.879987	0.495051	0.860978	0.317307	0.90384	0.829615	0.573406	0.547007	0.661703	0.528186	0.441055	0.414856	0.49138	1.12788	0.777414	0.566172	0.485219	0.847921	0.903291	0.605738
2011-11-04	1.03427	0.901354	0.478663	0.635341	0.494602	0.547338	0.35919	0.644874	0.703953	0.575734	0.50088	0.561059	0.432169	0.327819	0.326075	0.397569	0.902535	0.699852	0.521783	0.498681	0.624348	0.903175	0.582185
2011-11-11	1.06324	0.836821	0.552033	0.775791	0.553409	0.554283	0.420976	0.481413	0.668577	0.683365	0.488118	0.694205	0.441959	0.454066	0.419997	0.389707	0.841451	0.670855	0.497827	0.523328	0.486833	0.853635	0.609846
2011-11-18	1.1016	0.791788	0.47626	0.707044	0.744918	0.860634	1.10713	0.428225	0.709748	0.823527	0.463662	0.550997	0.410916	0.501872	0.415021	0.471583	0.767338	0.568235	0.52016	0.560496	0.774298	0.955579	0.594097
2011-11-25	1.17063	0.786384	0.318405	0.639249	0.774619	0.590423	0.475743	0.43212	0.687581	0.505683	0.453268	0.47295	0.349816	0.743645	0.338544	0.494483	0.794037	0.520363	0.620215	0.562372	0.642066	0.871951	0.578231
2011-12-02	1.27309	0.806832	0.513826	0.87461	1.24108	0.514742	0.303292	0.53835	0.990122	0.737185	0.48771	0.494612	0.381078	0.550008	0.287561	0.495657	0.749253	0.544071	0.797714	0.582322	0.646468	1.1791	0.52986
2011-12-09	1.40746	0.773573	0.521325	0.736948	0.973549	0.709982	0.448695	0.68439	1.50918	0.421241	0.519864	0.448177	0.308134	0.465445	0.289064	0.529279	0.642736	0.593847	0.832644	0.584437	0.577229	0.932896	0.460049
2011-12-16	1.4888	0.728445	0.623751	0.730879	0.627237	0.550328	0.314435	0.673469	1.45858	0.439455	0.471855	0.486657	0.258766	0.470551	0.368596	0.504568	0.591836	0.555567	0.831149	0.569967	0.595291	0.842543	0.44684
2011-12-23	1.54594	0.706761	0.483796	0.571254	0.509003	0.693214	0.260984	0.58736	0.834556	0.448494	0.460259	0.441532	0.299621	0.444991	0.401264	0.52104	0.63277	0.490353	0.807526	0.544311	0.370294	0.710648	0.492542
2011-12-30	1.62885	0.718221	0.743333	1.08258	0.614778	0.648005	0.328516	0.529253	0.942308	1.31445	0.511037	0.481255	0.319967	0.476282	0.47636	0.561418	0.689822	0.497426	0.788034	0.554023	1.10703	0.694703	0.537647
2012-01-06	1.6835	0.774054	0.498769	0.691917	0.747234	1.33008	0.447133	0.620684	1.06042	0.545769	0.534345	0.517322	0.363909	0.575328	0.343331	0.568205	0.793709	0.493495	0.706926	0.529659	0.938362	0.583032	0.469889
2012-01-13	1.64517	0.828679	0.703567	0.590148	0.822549	1.47498	0.554335	0.69409	0.962754	0.555259	0.512657	0.573834	0.300833	0.412096	0.327977	0.465661	0.745058	0.475793	0.658408	0.523764	0.947407	0.584779	0.516263
2012-01-20	1.61267	0.804274	0.525671	0.559268	0.746491	1.43485	0.431296	0.69686	0.711341	0.462244	0.510742	0.519387	0.252233	0.468072	0.2994	0.386658	0.641358	0.500986	0.647457	0.527948	0.982744	0.670907	0.629246
2012-01-27	1.58612	0.74848	0.725204	0.650873	0.775553	1.05516	0.360653	0.606538	0.745315	0.794658	0.521741	0.548187	0.238026	0.363546	0.383719	0.343169	0.647597	0.502886	0.584995	0.544715	0.657582	0.62166	0.621858
2012-02-03	1.54348	0.721545	0.450759	0.726594	0.767853	0.956457	0.258039	0.604343	0.756004	0.552165	0.516066	0.463795	0.311088	0.387219	0.308544	0.358267	0.725804	0.510307	0.535676	0.560484	1.00542	0.620565	0.643446
2012-02-10	1.50578	0.746905	0.935334	0.756553	0.752231	0.843543	0.604249	0.70178	0.750953	0.68338	0.474026	0.439669	0.299742	0.468971	0.236976	0.365866	0.72002	0.46568	0.498852	0.571026	1.24391	0.622127	0.581429
2012-02-17	1.46522	0.740094	0.596427	0.474877	0.677247	0.612583	0.402017	0.438908	0.659102	0.583792	0.435589	0.459391	0.271988	0.438735	0.233458	0.368912	0.663899	0.451515	0.504876	0.562645	0.424915	0.587656	0.540978
2012-02-24	1.40553	0.729167	0.506135	0.607419	0.679988	0.789383	0.230367	0.461581	0.705467	0.447551	0.427696	0.538122	0.337062	0.677655	0.323378	0.420822	0.663205	0.500375	0.532857	0.553879	0.779624	0.613943	0.568285
2012-03-02	1.35332	0.751389	0.692424	0.621177	0.690172	0.662069	0.406754	0.597507	0.795151	0.622976	0.408031	0.546698	0.402486	0.79283	0.373502	0.475583	0.614052	0.560882	0.598679	0.537524	0.700512	0.623901	0.553763
2012-03-09	1.32968	0.800851	0.780982	0.850909	0.825739	0.649164	0.44065	0.544654	0.677558	0.825742	0.409789	0.438741	0.362972	0.609094	0.346184	0.500658	0.599316	0.560628	0.587065	0.50728	1.05808	0.667293	0.467226
2012-03-16	1.30611	0.852698	0.501573	0.783559	0.970935	0.787057	0.347141	0.524118	0.866857	0.91097	0.424988	0.422005	0.326732	0.581483	0.359842	0.539395	0.604748	0.567486	0.512348	0.477984	0.531562	0.751721	0.39634
2012-03-23	1.26191	0.943448	0.651615	0.647689	0.672219	0.744763	0.380054	0.524687	0.864065	0.723946	0.449248	0.455662	0.273279	0.526288	0.368619	0.513705	0.573007	0.518437	0.493408	0.449365	0.517404	0.740349	0.332318
2012-03-30	1.2293	0.896688	0.863723	0.600717	0.669248	0.749202	0.636435	0.555126	0.777551	0.527469	0.504981	0.459925	0.268037	0.654068	0.415463	0.560925	0.593736	0.519259	0.46087	0.442667	0.456621	0.727308	0.322477
2012-04-06	1.20617	0.833971	0.515663	0.673457	0.708665	0.832694	0.307948	0.487224	0.743058	0.578869	0.458711	0.445081	0.288777	0.666432	0.297635	0.518985	0.662138	0.535766	0.470933	0.448184	0.742831	0.659078	0.343889
2012-04-13	1.20164	0.799689	0.613907	0.751083	0.566601	0.778514	0.369299	0.500961	0.923049	0.39442	0.437395	0.426925	0.371965	0.610255	0.341853	0.485296	0.708924	0.549305	0.505773	0.454694	0.679673	0.677893	0.418907
2012-04-20	1.19435	0.810693	1.02154	0.784606	0.574427	1.08499	1.17849	0.558621	0.84254	0.619336	0.395274	0.373869	0.323512	0.367812	0.247232	0.413306	0.649954	0.476624	0.542611	0.437918	0.752609	0.607489	0.471321
2012-04-27	1.18235	0.844862	0.745038	0.632551	0.811967	1.32413	0.295246	0.615473	0.811408	0.466129	0.380464	0.35458	0.261066	0.343758	0.276141	0.403441	0.552321	0.429865	0.557917	0.443439	0.901875	0.637857	0.476323
2012-05-04	1.14295	0.833502	0.792219	0.596829	0.561782	1.31456	0.621874	0.607692	0.74013	0.637778	0.412723	0.360284	0.269407	0.424754	0.266619	0.362006	0.495568	0.454477	0.540498	0.468135	0.688508	0.587967	0.426592
2012-05-11	1.10077	0.785154	0.933421	0.966841	0.715056	1.31754	0.781569	0.960094	0.652443	0.634027	0.456927	0.430966	0.243605	0.519597	0.278533	0.374285	0.547311	0.504409	0.577936	0.474243	0.638413	0.543118	0.42124
2012-05-18	1.07478	0.75455	0.863666	0.860536	0.768729	1.7439	0.952455	0.80445	0.714153	1.20441	0.515384	0.452517	0.268575	0.649821	0.528538	0.46164	0.579889	0.565024	0.588175	0.479651	1.10182	0.637845	0.474059
2012-05-25	1.04988	0.739086	0.870414	1.19728	1.20183	1.07877	0.325773	0.583866	0.599572	0.56468	0.540424	0.476464	0.269936	0.478191	0.506289	0.462299	0.598983	0.621243	0.66392	0.514573	0.422227	0.611463	0.565267
2012-06-01	1.04545	0.750207	0.661339	0.971797	1.32323	0.673033	0.342729	0.65849	0.711836	0.751713	0.565473	0.555403	0.322308	0.565923	0.443855	0.487662	0.690945	0.736862	0.71442	0.571134	0.66852	0.630482	0.664763
2012-06-08	1.04021	0.786274	0.622291	1.37412	0.758301	0.917896	0.338216	0.724543	0.843952	0.838618	0.586938	0.45139	0.347705	0.617977	0.456677	0.462635	0.770804	0.713008	0.6005	0.616237	0.79075	0.811141	0.685174
2012-06-15	1.04754	0.857987	0.702362	1.17537	0.853226	0.848065	1.2292	0.632104	1.03874	0.753786	0.574599	0.471279	0.29546	0.573731	0.498255	0.45319	0.631372	0.574586	0.547862	0.584115	0.613506	0.714302	0.624348
2012-06-22	1.0534	0.952063	1.05347	1.23653	0.935365	0.85072	0.714605	0.605072	1.14116	0.733384	0.629503	0.601219	0.310252	0.51922	0.680895	0.484395	0.541039	0.529073	0.60627	0.545727	0.567717	0.693004	0.578332
2012-06-29	1.05284	0.878727	0.922158	0.934253	1.0775	1.57214	0.342629	0.578509	0.81988	0.545053	0.619748	0.638889	0.332063	0.851099	0.433731	0.601022	0.501739	0.485674	0.602017	0.465721	0.55064	0.589621	0.493856
2012-07-06	1.0545	0.826819	0.913	0.85894	0.844267	1.06573	1.53877	0.937813	0.80857	0.672252	0.626359	0.715724	0.41253	1.2166	0.417438	0.686595	0.483694	0.480869	0.502004	0.412736	1.03806	0.592399	0.483413
2012-07-13	1.05204	0.824796	0.82476	0.863076	0.848992	1.0085	0.28283	0.762113	0.673547	0.620099	0.594473	0.667633	0.363161	0.84434	0.376868	0.578936	0.479877	0.478648	0.413552	0.3871	0.602623	0.560983	0.487746
2012-07-20	1.01923	0.803113	0.565554	0.543056	0.706321	0.918845	0.772775	0.833644	0.707205	0.552478	0.585842	0.708435	0.328388	0.894183	0.401993	0.573764	0.52528	0.412919	0.384515	0.381206	0.747658	0.548594	0.419744
2012-07-27	1.01119	0.777186	0.431828	0.711611	0.816173	0.641535	0.651332	0.887198	0.811585	0.421349	0.566508	0.739301	0.325713	0.505826	0.326078	0.45353	0.495635	0.403532	0.376085	0.398986	0.424399	0.517799	0.379634
2012-08-03	0.99977	0.784619	0.366478	0.758704	0.683157	0.915462	0.388802	0.883673	0.756273	0.547003	0.481791	0.612086	0.297625	0.443385	0.349381	0.372973	0.487691	0.414303	0.387068	0.423843	0.929128	0.508016	0.382941
2012-08-10	1.01115	0.803546	0.592987	0.666165	0.699709	1.13513	1.49246	0.850336	0.746783	0.753242	0.468152	0.586093	0.274342	0.374927	0.263595	0.349403	0.482677	0.45827	0.376422	0.455736	0.448078	0.532896	0.399914
2012-08-17	1.03295	0.809616	0.448213	0.777887	0.568829	1.09269	0.318013	0.692439	0.79194	0.610997	0.424608	0.597521	0.217003	0.459505	0.339597	0.392948	0.524357	0.462789	0.352867	0.483989	0.662449	0.537842	0.503524
2012-08-24	1.06105	0.84777	0.551866	0.607431	0.597223	1.20623	0.32233	0.579435	0.830335	0.560373	0.413853	0.591639	0.236277	0.428787	0.498426	0.36799	0.516817	0.458828	0.386688	0.463775	0.560526	0.555983	0.55934
2012-08-31	1.04152	0.891853	0.636216	0.656145	0.578095	0.833777	0.636168	0.556547	0.751057	0.542793	0.403315	0.629044	0.344859	0.437806	0.642083	0.34366	0.54155	0.458187	0.452509	0.460081	0.568826	0.609605	0.58378
2012-09-07	1.00531	0.989419	0.564298	0.657598	0.666909	0.85843	0.247795	0.693282	0.720602	0.576094	0.413067	0.640208	0.434003	0.453862	0.762354	0.334388	0.577712	0.424567	0.509751	0.477633	1.0512	0.653128	0.546452
2012-09-14	0.972575	0.973377	0.601759	0.780961	0.663326	0.849446	0.635897	0.957498	0.738439	0.612492	0.47282	0.828447	0.394101	0.424072	0.570651	0.377357	0.525832	0.397654	0.528715	0.473981	2.51531	0.856698	0.551432
2012-09-21	0.962907	0.98753	0.498883	0.806319	0.620032	0.995939	0.319429	0.765573	0.895898	0.985926	0.491443	0.758297	0.377496	0.50579	0.547136	0.287208	0.536554	0.369444	0.537416	0.436618	0.863482	0.664447	0.53518
2012-09-28	0.965558	1.03846	0.870424	0.669554	0.685613	0.764157	0.672046	0.802659	1.02661	0.986709	0.523273	1.00737	0.458852	0.354097	0.685015	0.225659	0.579532	0.341943	0.475683	0.401311	1.14914	0.594992	0.455906
2012-10-05	0.965702	1.06638	0.498187	0.520319	0.694499	0.663351	0.311773	0.726104	0.985532	0.452872	0.437514	0.611635	0.352974	0.308384	0.454728	0.217485	0.552925	0.34733	0.43912	0.388609	0.880156	0.561721	0.380999
2012-10-12	0.966499	1.00745	0.656002	0.575003	0.702317	0.660273	0.336155	0.558826	1.04989	0.567565	0.413156	0.543515	0.31818	0.389054	0.311474	0.236207	0.534792	0.344674	0.426198	0.384167	0.6183	0.590891	0.369121
2012-10-19	0.975409	0.985035	0.394727	0.767112	0.628459	0.773702	0.577357	0.6245	0.915181	0.364591	0.359038	0.488118	0.254355	0.508371	0.29278	0.287125	0.525491	0.358868	0.4408	0.379722	0.567798	0.515955	0.401438
2012-10-26	0.959398	0.9652	0.416361	0.596001	0.575418	0.850372	0.498504	0.560218	0.642743	0.340515	0.326023	0.485001	0.289819	0.412558	0.254749	0.290389	0.494995	0.379043	0.46449	0.372191	0.487317	0.445153	0.371856
2012-11-02	0.945684	0.981646	0.491544	0.638343	0.839884	0.740603	0.413548	0.783929	0.716538	0.52204	0.306127	0.552676	0.298409	0.456842	0.268568	0.350337	0.518341	0.420627	0.519645	0.365917	0.621918	0.387719	0.357592
2012-11-09	0.937123	0.998783	0.542072	0.517778	0.74377	0.898132	0.712202	0.796849	0.797192	0.497574	0.302174	0.620414	0.296171	0.637858	0.290466	0.406209	0.585012	0.413688	0.555515	0.360127	0.583394	0.474407	0.404742
2012-11-16	0.919291	0.985272	0.456879	0.937823	0.701331	1.03985	0.636337	0.663765	0.7856	0.516784	0.31045	0.604506	0.281998	0.509089	0.362881	0.366013	0.547689	0.40773	0.566146	0.352127	0.695886	0.505384	0.408562
2012-11-23	0.881328	0.962861	0.335384	0.541211	0.5907	0.735191	0.250717	0.47025	0.681483	0.389319	0.360445	0.503612	0.275798	0.673147	0.272018	0.413186	0.531685	0.43931	0.503104	0.355278	0.582455	0.622968	0.421341
2012-11-30	0.848908	0.944566	0.327004	0.479281	0.548392	0.610116	0.543652	0.455727	0.654707	0.740938	0.370777	0.519413	0.300544	0.466236	0.337928	0.347302	0.564141	0.409178	0.461191	0.369717	1.18899	0.822142	0.438082
2012-12-07	0.812158	0.916867	0.478213	0.621469	0.648891	0.689525	0.274759	0.482537	0.744251	0.608758	0.349624	0.359796	0.303193	0.406074	0.51585	0.318061	0.500515	0.352072	0.442491	0.384951	0.480217	0.698665	0.424627
2012-12-14	0.774879	0.85854	0.411129	0.642964	0.560154	0.864411	0.303961	0.518617	0.79262	0.429645	0.324599	0.330961	0.274984	0.4351	0.532779	0.301551	0.442471	0.302694	0.485939	0.399234	0.372693	0.56786	0.412679
2012-12-21	0.747105	0.811825	0.367031	0.71547	0.65108	1.02225	0.769071	0.537122	0.641768	0.45584	0.320817	0.292888	0.246121	0.551903	0.471545	0.27777	0.421678	0.284342	0.490172	0.427492	0.625955	0.485453	0.391368
2012-12-28	0.729841	0.810723	0.320631	0.512618	0.640478	1.45677	0.386764	0.482415	0.639478	0.48015	0.320346	0.351085	0.242901	0.465196	0.261261	0.334151	0.423397	0.271187	0.53639	0.425823	0.664577	0.461555	0.352645
2013-01-04	0.731627	0.809504	0.323853	0.610538	0.615435	1.11704	0.476665	0.543133	0.692093	0.556834	0.332463	0.459384	0.281859	0.679466	0.27391	0.346299	0.415154	0.247949	0.484822	0.434484	0.986403	0.530108	0.355992
2013-01-11	0.727522	0.795305	0.438387	0.663402	0.526723	0.769575	1.09205	0.63042	0.706943	0.44026	0.324714	0.443982	0.348982	0.393876	0.200224	0.353107	0.397299	0.239972	0.436757	0.412174	0.868296	0.617715	0.338175
2013-01-18	0.726159	0.808752	0.424031	0.556883	0.444219	0.840848	0.661791	0.551399	0.651719	0.486486	0.310424	0.404233	0.329339	0.563967	0.184499	0.401838	0.372424	0.25111	0.413989	0.385483	1.00841	0.481087	0.307954
2013-01-25	0.725214	0.785687	0.441701	0.734162	0.424604	0.698933	0.326281	0.486958	0.68866	0.512019	0.30508	0.39133	0.335769	0.786867	0.19765	0.40432	0.349749	0.275848	0.443373	0.368334	0.55087	0.439704	0.3259
2013-02-01	0.72451	0.724344	0.382741	0.559822	0.43963	0.948995	0.271773	0.465301	0.677781	0.539339	0.32249	0.342283	0.309572	0.498372	0.213566	0.350948	0.367875	0.310178	0.452207	0.366024	0.919499	0.474236	0.308209
2013-02-08	0.720669	0.693848	0.465018	0.507552	0.658705	0.84309	0.415983	0.622089	0.717321	0.5168	0.370938	0.335677	0.306428	0.622259	0.256108	0.37023	0.42444	0.361455	0.49311	0.373905	0.553551	0.520971	0.315198
2013-02-15	0.708405	0.701209	0.413849	0.636049	0.582498	0.893163	0.324064	0.667524	0.660546	0.530509	0.44799	0.393424	0.272704	0.699801	0.40354	0.411581	0.42614	0.432905	0.517269	0.391316	1.42564	0.624222	0.366462
2013-02-22	0.705892	0.74135	0.518301	0.627224	0.673826	0.861581	0.347881	0.708375	0.61466	0.699446	0.465931	0.514381	0.304031	0.75435	0.521517	0.433155	0.455025	0.436343	0.557419	0.382538	1.05976	0.626223	0.421832
2013-03-01	0.719776	0.771896	0.665183	0.673564	0.657437	1.42968	0.738938	0.514513	0.656863	0.88668	0.483028	0.908788	0.368551	0.601078	0.514015	0.42375	0.518665	0.432292	0.540043	0.352613	0.958093	0.455758	0.41313
2013-03-08	0.722522	0.750225	0.575896	0.540251	0.532775	1.50699	0.41588	0.503317	0.615911	0.478755	0.432486	0.509175	0.303097	0.500915	0.304991	0.363774	0.522617	0.452113	0.501592	0.342599	0.545433	0.4295	0.385751
2013-03-15	0.72414	0.717533	0.500828	0.739828	0.497954	0.811369	0.483122	0.493018	0.603108	0.597679	0.438972	0.355054	0.279283	0.400141	0.305655	0.327382	0.567372	0.51075	0.447441	0.337712	0.49798	0.519366	0.370863
2013-03-22	0.731106	0.732057	0.55729	0.685817	0.533653	0.737394	0.975334	0.527295	0.534568	0.537393	0.472545	0.422354	0.291793	0.629097	0.3085	0.35063	0.577659	0.495028	0.468018	0.35307	0.376269	0.51755	0.394879
2013-03-29	0.73469	0.788167	0.950729	0.533178	0.720071	0.734235	0.309384	0.558956	0.453621	0.699449	0.549577	0.596317	0.454625	0.735728	0.383409	0.437958	0.564021	0.536625	0.51268	0.394175	0.519105	0.461938	0.399285
2013-04-05	0.746593	0.800458	0.473589	0.722899	0.800056	1.28296	0.299043	0.594719	0.483101	0.617727	0.571304	0.522288	0.556331	0.713056	0.637105	0.409618	0.641567	0.680869	0.595549	0.430248	0.405818	0.502592	0.422587
2013-04-12	0.763853	0.792147	0.527182	1.08632	0.863432	1.09271	0.366218	0.690559	0.539466	0.622355	0.668919	0.598416	0.525895	0.759771	0.575785	0.437547	0.724555	1.05003	0.566695	0.446505	0.759243	0.653509	0.455612
2013-04-19	0.772363	0.805976	0.71105	0.809476	0.765894	0.860025	0.297486	0.600013	0.674058	0.403255	0.560671	0.522248	0.448305	0.840216	0.381203	0.498735	0.804343	0.973604	0.479878	0.428501	0.64014	0.651589	0.439426
2013-04-26	0.786239	0.786464	0.693964	0.551975	0.696237	1.12648	0.306026	0.609507	0.646419	0.544254	0.50006	0.472768	0.434495	0.764872	0.394125	0.452281	0.885246	0.897882	0.439319	0.421705	0.740334	0.593796	0.469596
2013-05-03	0.792984	0.746797	0.702892	0.729514	0.730198	0.906195	0.308326	0.684009	0.676983	0.616208	0.455858	0.440487	0.437305	0.538924	0.596385	0.41263	1.07883	0.795684	0.435482	0.405565	0.626681	0.664335	0.483428
2013-05-10	0.802647	0.729698	0.597099	0.565777	0.600664	0.797109	0.470992	0.593061	0.587507	0.488348	0.421834	0.478243	0.329488	0.574486	0.516556	0.386356	0.886176	0.792872	0.51923	0.403173	0.584498	0.578642	0.42429
2013-05-17	0.806094	0.736771	0.778916	0.541111	0.718373	0.766008	0.375054	0.68081	0.530175	0.48201	0.409697	0.412945	0.31337	0.777804	0.388481	0.462749	0.754815	0.722903	0.528571	0.415822	0.504386	0.485063	0.383495
2013-05-24	0.813507	0.747611	0.572424	0.561622	0.781929	0.679387	0.402391	0.665409	0.56865	0.535302	0.407515	0.405644	0.32414	0.444219	0.298476	0.420516	0.68046	0.62732	0.481248	0.41088	0.355746	0.424186	0.388843
2013-05-31	0.819365	0.752514	0.492162	0.59204	0.621102	0.743237	0.324987	0.538656	0.555115	0.394879	0.443694	0.357758	0.319097	0.618201	0.276438	0.447663	0.678681	0.590497	0.461665	0.416473	0.519748	0.461284	0.447516
2013-06-07	0.827455	0.770155	0.448799	0.661407	0.579443	0.696698	0.350025	0.489903	0.543065	0.396274	0.417267	0.405327	0.36058	0.634629	0.28825	0.439294	0.657162	0.554785	0.438785	0.430001	0.719762	0.529553	0.472903
2013-06-14	0.832615	0.775476	0.56446	0.833152	0.640238	0.749935	0.392	0.448316	0.810066	0.675096	0.406776	0.387065	0.376304	0.454303	0.400344	0.389671	0.630125	0.601233	0.465587	0.462673	0.605897	0.599484	0.530541
2013-06-21	0.813391	0.777667	0.713481	0.678889	0.649459	0.905078	0.367085	0.575535	0.867808	0.731135	0.432535	0.35463	0.351507	0.39126	0.423783	0.356832	0.717895	0.703683	0.42545	0.494592	0.467624	0.720182	0.561041
2013-06-28	0.817652	0.814044	0.931068	0.637359	0.886897	0.798289	1.10638	0.513209	0.710814	0.734535	0.446132	0.451094	0.337433	0.437312	0.298655	0.377218	0.739736	0.665651	0.429613	0.495401	0.535904	0.659681	0.678093
2013-07-05	0.826758	0.837138	0.557854	0.65604	0.630857	0.625797	0.356364	0.576031	0.559999	0.45273	0.414753	0.42854	0.341189	0.598022	0.354875	0.449123	0.695225	0.534504	0.418696	0.481372	0.436856	0.705296	0.588589
2013-07-12	0.828659	0.879023	0.544869	0.565262	0.571705	0.941037	1.06837	0.791352	0.579419	0.725374	0.420715	0.374762	0.277564	0.746941	0.247149	0.508921	0.641935	0.466946	0.391056	0.444123	0.875508	0.729024	0.515366
2013-07-19	0.827308	0.923146	0.492783	0.57651	0.568256	0.839033	0.571603	0.891525	0.568806	0.535668	0.427996	0.436116	0.268439	0.65194	0.307085	0.533127	0.591244	0.472559	0.402884	0.428579	0.629099	0.695255	0.510269
2013-07-26	0.832445	0.905468	0.844511	0.606644	0.686476	0.791972	0.561307	0.898329	0.744355	0.758963	0.454077	0.572156	0.213443	0.668302	0.263484	0.508966	0.652172	0.4701	0.401019	0.415724	0.518124	0.661597	0.448943
2013-08-02	0.855638	0.896008	0.697458	0.584287	0.535513	0.810436	1.32728	0.594404	0.616991	0.681373	0.431597	0.514522	0.210305	0.44544	0.192648	0.406486	0.67661	0.473664	0.415926	0.408202	0.453583	0.588766	0.439133
2013-08-09	0.856713	0.848778	0.542052	0.596506	0.569856	1.11305	0.99114	0.702136	0.597027	0.838848	0.422148	0.418495	0.217583	0.533255	0.279908	0.403362	0.64812	0.488248	0.478936	0.420466	0.384892	0.579636	0.457813
2013-08-16	0.849524	0.810787	0.885319	0.745229	0.715839	0.821539	0.33112	0.778332	0.705165	0.433595	0.47294	0.512703	0.256954	0.796752	0.2679	0.460342	0.590069	0.515685	0.452268	0.438272	0.310788	0.568839	0.485746
2013-08-23	0.859223	0.747378	0.810686	0.84467	0.644255	0.91801	1.17723	0.813016	0.520703	0.496851	0.481275	0.547514	0.324938	0.445422	0.281834	0.41357	0.603761	0.503094	0.428539	0.415737	0.521961	0.543411	0.450444
2013-08-30	0.878818	0.693716	0.749584	0.522173	0.615809	0.733704	0.248281	0.618076	0.494719	0.585984	0.48107	0.643676	0.380174	0.399319	0.391922	0.378659	0.610617	0.486311	0.412835	0.384135	0.646603	0.530606	0.476431
2013-09-06	0.884952	0.699038	1.22816	0.569582	0.659075	0.893079	0.277217	0.770504	0.646486	0.518949	0.515399	0.612775	0.304707	0.338753	0.314481	0.385477	0.575402	0.524613	0.42965	0.358616	0.532748	0.473362	0.483087
2013-09-13	0.853826	0.721164	1.04016	0.565125	0.690457	1.16625	0.571411	1.03244	0.534318	0.704664	0.517824	0.573305	0.325643	0.458711	0.359006	0.471191	0.563829	0.567042	0.494631	0.351623	0.389655	0.466312	0.478393
2013-09-20	0.833134	0.716718	0.513037	0.708536	0.51317	0.835177	0.609296	0.733567	0.602991	1.02697	0.458347	0.445657	0.329323	0.360153	0.501557	0.422192	0.605089	0.631396	0.542003	0.363167	0.450283	0.451965	0.513211
2013-09-27	0.836581	0.706378	0.563173	0.566117	0.885308	0.888134	0.309542	0.580403	0.941267	0.64979	0.402766	0.409169	0.268874	0.378233	0.406258	0.358664	0.581374	0.62182	0.539281	0.376171	0.465572	0.49554	0.498868
2013-10-04	0.852506	0.666304	0.390448	0.469554	0.550535	0.680425	1.15271	0.47416	0.645912	0.356373	0.383157	0.327263	0.275261	0.265168	0.27379	0.34829	0.585772	0.60721	0.560492	0.371522	0.32104	0.662669	0.521513
2013-10-11	0.85542	0.668689	0.316722	0.461621	0.528438	0.702424	0.539472	0.424553	0.619278	0.334427	0.393565	0.261947	0.310495	0.337277	0.282857	0.389603	0.61377	0.671303	0.521918	0.37372	0.614446	0.589656	0.443547
2013-10-18	0.86142	0.688801	0.468631	1.14901	0.868609	1.00142	0.463313	0.511878	0.690317	0.765528	0.385726	0.280328	0.301303	0.73981	0.516445	0.543302	0.571887	0.656878	0.457227	0.395195	0.452666	0.588682	0.383831
2013-10-25	0.860949	0.692872	0.467038	0.617642	0.749191	0.786805	0.444467	0.547301	0.62584	0.34304	0.390281	0.320526	0.2556	0.404809	0.431608	0.421283	0.554237	0.57161	0.430523	0.396984	0.573647	0.494064	0.36406
2013-11-01	0.8664	0.717235	0.310498	0.581728	0.58172	1.10054	0.228082	0.53918	0.526396	0.384221	0.393074	0.298912	0.228233	0.331981	0.409872	0.36559	0.591016	0.580197	0.404393	0.37608	0.535114	0.447918	0.371538
2013-11-08	0.872545	0.795418	0.539118	0.522951	0.657996	1.32008	0.731807	0.724741	0.457422	0.60531	0.396073	0.395694	0.218477	0.394052	0.386088	0.346523	0.575174	0.586794	0.372015	0.364129	0.331854	0.467572	0.370382
2013-11-15	0.85135	0.898465	0.598907	0.648511	0.702206	0.757091	0.474093	0.830503	0.475818	0.400228	0.343198	0.371676	0.250116	0.39766	0.372897	0.30963	0.536067	0.517449	0.340205	0.350188	0.423541	0.466192	0.359042
2013-11-22	0.812918	0.889228	0.476676	0.607268	0.745243	0.497931	0.386952	0.70859	0.470785	0.361216	0.327707	0.350679	0.266078	0.360333	0.410462	0.298875	0.510946	0.497936	0.314939	0.341368	0.297269	0.422148	0.35147
2013-11-29	0.795923	0.878805	0.425538	0.592715	0.893544	0.511341	0.433356	0.464109	0.466308	0.371919	0.292548	0.317666	0.239555	0.518881	0.291993	0.309836	0.503963	0.498947	0.328262	0.338314	0.504095	0.409189	0.384431
2013-12-06	0.791877	0.928179	0.39143	0.641551	0.813391	0.731389	0.251248	0.439559	0.491492	0.475204	0.295108	0.310913	0.236522	0.526833	0.265684	0.306171	0.549874	0.46739	0.371296	0.329613	0.602603	0.438179	0.416784
2013-12-13	0.782094	0.944747	0.668533	0.733281	0.717452	0.829168	0.568968	0.500627	0.57959	0.476679	0.315626	0.28932	0.244055	0.535179	0.359983	0.307436	0.548092	0.442708	0.352263	0.339541	0.398575	0.458128	0.436204
2013-12-20	0.785155	0.887729	0.567031	0.640784	0.647051	1.05163	0.323918	0.557939	0.649889	0.397227	0.340801	0.302576	0.21152	0.535789	0.343113	0.374317	0.465104	0.425713	0.330708	0.36214	0.390575	0.452621	0.378938
2013-12-27	0.808057	0.920947	0.530816	0.613488	0.457551	1.09853	0.361343	0.554597	0.495918	0.410655	0.321479	0.294987	0.199931	0.68316	0.287012	0.381812	0.458987	0.409102	0.346049	0.404587	0.742313	0.465258	0.37935
2014-01-03	0.824536	1.06073	0.546531	0.490845	0.545616	0.815548	0.39333	0.727857	0.584332	0.455553	0.334166	0.294914	0.205055	0.711204	0.368417	0.34635	0.492522	0.400143	0.374039	0.409417	0.579781	0.57786	0.380527
2014-01-10	0.804646	1.02468	0.937081	0.693916	0.967858	1.04051	0.388781	0.621771	0.674983	0.794067	0.316921	0.293516	0.22822	0.342039	0.316771	0.319741	0.527067	0.433705	0.416436	0.417157	0.542027	0.652965	0.366367
2014-01-17	0.806182	1.01522	0.50571	0.564693	0.604444	0.743146	0.389277	0.640593	0.701576	0.408193	0.30944	0.283108	0.289244	0.417154	0.308756	0.340933	0.575086	0.463856	0.383787	0.40717	0.471041	0.605931	0.342003
2014-01-24	0.802312	1.1011	0.563317	0.586013	0.778468	0.69952	0.283656	0.552688	0.73428	0.410614	0.34645	0.276866	0.422527	0.488407	0.298954	0.353884	0.615532	0.523142	0.394861	0.402427	0.394802	0.592614	0.375612
2014-01-31	0.741235	1.31716	0.493275	0.608988	0.865101	0.737574	0.343486	0.547105	1.00167	0.49782	0.380503	0.392955	0.474188	0.508877	0.331699	0.350975	0.597415	0.522442	0.379496	0.386368	0.49746	0.54621	0.351374
2014-02-07	0.694626	1.40668	0.393839	0.63757	1.04471	0.597893	0.33518	0.626074	0.818899	0.442014	0.360046	0.373845	0.422376	0.527225	0.35524	0.357847	0.631982	0.504169	0.389612	0.363957	0.499736	0.538876	0.357885
2014-02-14	0.659436	1.51774	0.40744	0.5706	0.681547	0.666374	0.683538	0.652976	0.787979	0.428395	0.374048	0.312562	0.376173	0.477673	0.425393	0.302109	0.633411	0.493377	0.361242	0.344576	0.731302	0.527819	0.418406
2014-02-21	0.640355	1.5917	0.563157	0.722809	0.758487	0.663644	0.540616	0.642068	1.00375	0.462466	0.383651	0.307706	0.399147	0.412815	0.506579	0.287354	0.676982	0.509709	0.333699	0.344307	0.274007	0.502638	0.407105
2014-02-28	0.619951	1.55307	0.745934	0.723428	0.732224	0.576608	1.00565	0.69541	1.16184	0.636961	0.397942	0.37945	0.396396	0.506528	0.589517	0.342156	0.795231	0.572176	0.34337	0.35919	0.540506	0.61323	0.397724
2014-03-07	0.599722	1.52564	0.685997	0.911883	1.30244	0.677147	0.46322	0.810485	0.919574	0.553563	0.376043	0.427901	0.353235	0.427267	0.698895	0.379264	0.952569	0.568549	0.401758	0.379133	0.745308	0.583003	0.371552
2014-03-14	0.581363	1.44789	0.526556	0.585486	1.00895	0.768049	0.339924	0.76144	0.885863	0.787442	0.383444	0.41005	0.321452	0.353944	0.686717	0.396537	0.822509	0.564371	0.486087	0.381564	0.369061	0.581778	0.361756
2014-03-21	0.558092	1.40098	0.545708	0.64316	1.23808	0.668035	0.490878	0.71618	0.73612	0.566841	0.400805	0.445031	0.29189	0.607318	0.690481	0.426535	0.74594	0.546639	0.610031	0.373815	0.395203	0.591206	0.349714
2014-03-28	0.542324	1.36024	0.600295	0.750745	0.966284	0.813307	0.376403	0.665964	0.852594	0.684627	0.40266	0.463746	0.235449	0.510953	0.449304	0.383654	0.702293	0.494871	0.492619	0.386341	0.382301	0.563442	0.314913
2014-04-04	0.530517	1.43252	0.482778	0.712214	0.790053	0.66608	0.903788	0.587772	0.771413	0.547773	0.404677	0.465107	0.239744	0.573395	0.278516	0.377187	0.598847	0.473693	0.45061	0.379825	0.75344	0.525685	0.332085
2014-04-11	0.518149	1.44712	0.397905	0.568112	0.77516	0.793908	0.477356	0.69506	0.740872	0.526974	0.402346	0.479788	0.248966	0.612275	0.371377	0.386508	0.506221	0.442619	0.449197	0.383237	0.715029	0.598047	0.341494
2014-04-18	0.506884	1.46895	0.413264	0.502286	0.564529	0.562719	0.230275	0.698271	0.805393	0.480752	0.390837	0.424851	0.220017	0.603094	0.489917	0.390213	0.455181	0.42628	0.409993	0.396727	0.42058	0.547133	0.329408
2014-04-25	0.50092	1.38648	0.419643	0.575384	0.793745	0.672837	0.435568	0.745798	0.871164	0.498293	0.362015	0.38767	0.237108	0.617782	0.337789	0.402612	0.449958	0.417194	0.431189	0.416283	0.909253	0.577355	0.360211
2014-05-02	0.494434	1.33801	0.646321	0.612019	0.685293	0.799916	0.290377	0.732345	1.00297	0.527865	0.328935	0.381696	0.219117	0.669411	0.302593	0.424363	0.448003	0.446327	0.443983	0.429285	0.663354	0.699142	0.344154
2014-05-09	0.494062	1.43134	0.594026	1.07314	0.826624	0.628928	0.347277	0.784865	0.76616	0.512279	0.315356	0.38583	0.256129	0.486592	0.29939	0.421615	0.482672	0.462201	0.415755	0.441973	0.506903	1.11189	0.347768
2014-05-16	0.497657	1.3936	0.611162	0.492073	0.768299	0.743235	0.257425	0.664396	0.714124	0.529628	0.326	0.378387	0.277392	0.571192	0.184373	0.423981	0.477549	0.417005	0.404075	0.442801	0.319369	1.22003	0.334658
2014-05-23	0.495651	1.21017	0.453907	0.545453	0.744043	0.524819	0.327764	0.601813	0.595535	0.412984	0.314854	0.433238	0.237965	0.6536	0.205989	0.426478	0.53123	0.451245	0.424387	0.4545	0.846451	0.804755	0.31984
2014-05-30	0.497794	1.14476	0.450586	0.498368	0.751972	0.791758	0.349804	0.524126	0.630268	0.427839	0.331662	0.424391	0.222834	0.680111	0.311001	0.416705	0.598777	0.500441	0.424956	0.492505	0.476044	0.734828	0.34699
2014-06-06	0.509618	1.10877	0.542132	0.563909	0.881094	0.54005	0.322206	0.493654	0.589384	0.528493	0.360253	0.425117	0.236038	0.55015	0.285074	0.411546	0.622501	0.527611	0.434744	0.533708	0.612886	0.669346	0.404745
2014-06-13	0.528132	1.06756	0.462397	1.11902	1.63409	0.70507	0.848522	0.527902	0.75852	0.510533	0.32043	0.385526	0.321184	0.651587	0.586053	0.452438	0.555546	0.621607	0.503987	0.554521	0.292209	0.81725	0.465951
2014-06-20	0.528697	1.05621	0.530713	0.812408	0.806957	0.848064	0.263474	0.527258	0.720806	0.491529	0.32647	0.372443	0.304481	0.672777	0.564295	0.480966	0.545749	0.549638	0.476238	0.483015	0.316608	0.817465	0.402582
2014-06-27	0.537535	1.04586	0.654206	0.627395	0.6399	0.80187	0.863685	0.541596	0.904735	0.591182	0.393021	0.457102	0.342788	0.873291	0.495215	0.499357	0.550121	0.471706	0.403003	0.412849	0.515447	0.733454	0.325582
2014-07-04	0.515723	1.04798	0.506634	0.653412	0.769346	0.557008	0.74933	0.577939	0.682524	0.574553	0.418034	0.423682	0.28125	0.844826	0.300419	0.545645	0.528198	0.443079	0.387504	0.370633	0.347161	0.753497	0.305358
2014-07-11	0.507501	1.11969	0.491042	0.697991	0.827892	0.510216	1.22227	0.602178	0.574554	0.677256	0.451307	0.469827	0.23881	0.859334	0.310519	0.58089	0.506531	0.480567	0.379032	0.344184	0.450179	0.66258	0.344491
2014-07-18	0.503424	1.17708	0.60447	0.463689	0.59763	0.519985	0.512281	0.61102	0.655147	1.08273	0.475574	0.323936	0.239181	1.06256	0.212165	0.655198	0.555626	0.503423	0.362579	0.324348	0.249318	0.650783	0.372442
2014-07-25	0.496718	1.22098	0.627188	0.82035	0.746357	0.760661	0.804095	0.684038	0.642512	0.64887	0.523725	0.355079	0.333233	1.22925	0.275239	0.681709	0.647192	0.513343	0.375715	0.319674	0.397546	0.637395	0.36275
2014-08-01	0.496122	1.29256	0.539794	0.610815	0.744518	0.700196	0.469491	0.872427	0.586209	0.68259	0.537048	0.449098	0.366579	0.612439	0.295582	0.540759	0.612038	0.53989	0.411981	0.321657	0.680017	0.562475	0.329901
2014-08-08	0.502798	1.26108	0.635989	0.613174	0.613774	0.672185	0.271697	0.780728	0.618524	0.661673	0.476671	0.418796	0.340497	0.43647	0.449849	0.436315	0.617989	0.485933	0.455461	0.318626	0.412481	0.502297	0.305344
2014-08-15	0.525556	1.2278	0.585455	0.542897	0.588908	0.704104	0.237265	0.702786	0.623916	0.56256	0.466132	0.455609	0.339837	0.525211	0.56282	0.416347	0.628332	0.454439	0.501955	0.317884	0.451586	0.484387	0.302393
2014-08-22	0.553931	1.22234	0.639743	0.628361	0.676556	0.757956	0.338346	1.04935	0.826772	0.573608	0.491187	0.545226	0.32455	0.54714	0.78638	0.410844	0.655208	0.434116	0.483609	0.319206	0.523952	0.531672	0.324054
2014-08-29	0.590391	1.24719	0.669235	0.53435	0.552171	0.689192	0.340286	1.57434	0.699159	0.693267	0.480561	0.605744	0.378009	0.531753	0.547275	0.403179	0.700084	0.411818	0.459612	0.320605	0.493819	0.658771	0.395782
2014-09-05	0.642822	1.2258	0.574405	0.579192	0.460036	0.466154	0.332083	0.981226	0.699118	0.572458	0.482954	0.483012	0.336933	0.446921	0.390987	0.385768	0.716769	0.430729	0.445958	0.338651	0.282038	0.837481	0.576939
2014-09-12	0.719177	1.17013	0.464233	0.777088	0.556174	0.567701	0.369168	1.01556	0.810199	0.753278	0.472318	0.486508	0.281979	0.640357	0.410318	0.382512	0.631242	0.438869	0.453006	0.355294	0.686364	0.738335	0.647482
2014-09-19	0.807107	1.17195	0.837281	0.688572	0.623883	0.661277	0.36704	1.57855	0.834786	1.07681	0.481247	0.50996	0.304843	0.630922	0.354354	0.430774	0.544041	0.454836	0.461278	0.369557	0.390594	0.661937	0.601928
2014-09-26	0.843784	1.2429	0.891958	0.626703	0.808171	0.82829	0.300291	1.11331	1.02073	1.52384	0.48519	0.51913	0.347928	0.560217	0.321858	0.386504	0.515094	0.482954	0.527377	0.396503	0.55767	0.707415	0.564157
2014-10-03	0.872876	1.24933	0.526067	0.577439	0.625628	0.710184	0.268964	0.914915	0.868174	0.970466	0.527331	0.581215	0.415603	0.672913	0.346047	0.423297	0.566769	0.52896	0.530721	0.420154	0.840551	0.814994	0.551922
2014-10-10	0.87905	1.15563	0.780912	0.608173	0.754522	0.894539	0.473194	0.82602	0.636064	1.0795	0.54521	0.560025	0.481323	0.890647	0.387312	0.505799	0.632872	0.555636	0.567075	0.412612	0.833352	0.728069	0.54533
2014-10-17	0.848842	1.11554	0.571548	0.529529	0.559859	0.686799	0.458998	0.725427	0.667286	0.485778	0.534	0.564786	0.335257	0.848538	0.39469	0.530811	0.665763	0.611569	0.589564	0.407724	0.448309	0.775003	0.509021
2014-10-24	0.825508	0.994323	0.531388	0.50599	0.837223	0.637504	0.922831	0.833008	0.804918	0.456373	0.480896	0.439183	0.29668	0.514539	0.688255	0.445346	0.556706	0.659769	0.524149	0.409736	0.416552	0.782729	0.472508
2014-10-31	0.787688	0.922372	0.767857	0.479254	0.884107	0.733628	1.37696	1.03128	0.648813	0.735603	0.478218	0.386514	0.357536	0.421887	0.66163	0.450944	0.465605	0.738388	0.522613	0.410492	0.411954	0.768291	0.476603
2014-11-07	0.757647	0.91474	0.625824	0.575633	0.734086	1.06917	1.12058	0.76648	0.672493	0.791818	0.445764	0.419995	0.470329	0.36332	0.345448	0.345115	0.447447	0.643961	0.426711	0.400773	0.69899	0.68231	0.439052
2014-11-14	0.735448	0.965067	0.602115	0.639082	0.882401	1.02805	1.01116	0.863849	0.664628	0.660451	0.469464	0.561887	0.445739	0.394153	0.400047	0.319255	0.474287	0.598987	0.414242	0.388463	0.558211	0.656579	0.453361
2014-11-21	0.713178	0.986077	0.580806	0.555745	0.79161	0.929299	0.40689	0.746398	0.603532	0.497875	0.476207	0.457468	0.444999	0.432933	0.351174	0.346262	0.540197	0.550607	0.469651	0.382437	0.383142	0.674801	0.510298
2014-11-28	0.693745	0.907438	0.519865	0.495502	0.831396	0.638499	0.42522	0.937461	0.58856	1.06924	0.539736	0.598236	0.506952	0.586565	0.309904	0.412045	0.534229	0.51272	0.546817	0.396148	0.956989	0.744528	0.718727
2014-12-05	0.68063	0.877226	0.506526	0.545994	0.776521	0.58091	0.957282	0.870209	0.629285	0.616591	0.563901	0.469934	0.470326	0.713381	0.244121	0.494712	0.564482	0.528138	0.542795	0.426201	0.908057	0.760932	0.66728
2014-12-12	0.674635	0.891896	0.469261	0.547814	0.627481	0.579357	0.431611	0.54086	0.648248	0.664011	0.597807	0.447138	0.543411	0.798235	0.340843	0.561659	0.575597	0.478736	0.51438	0.469669	0.507379	0.739338	0.686889
2014-12-19	0.655578	0.910995	0.328819	0.462643	0.652999	0.90527	0.53836	0.48991	0.604865	1.02453	0.668491	0.500151	0.864747	1.17216	0.535565	0.788921	0.615199	0.458105	0.542444	0.503693	0.883732	0.690781	0.701478
2014-12-26	0.647039	0.957167	0.5792	0.573207	0.562931	0.769649	0.336979	0.574208	0.531509	0.582642	0.652087	0.525108	0.800345	1.70851	0.393417	1.06308	0.660684	0.50705	0.524491	0.544715	0.643231	0.590329	0.676173
2015-01-02	0.655436	1.02722	0.629508	0.596243	0.662003	0.958654	0.430847	0.756308	0.746258	0.42536	0.592336	0.504327	0.454251	1.78159	0.362384	1.12366	0.740399	0.489186	0.556703	0.518172	0.658111	0.613163	0.699877
2015-01-09	0.672035	1.06546	0.856465	0.446124	0.585967	0.716054	0.377585	0.818155	0.829374	0.543697	0.559956	0.573084	0.323244	1.05098	0.302851	0.813162	0.961207	0.51651	0.576713	0.488612	1.12554	0.677626	0.704845
2015-01-16	0.673096	1.11405	0.651918	0.584497	0.701014	0.597446	0.420644	0.684186	0.981922	0.483808	0.496017	0.588081	0.330238	0.921854	0.388676	0.666084	1.10522	0.569074	0.670976	0.480825	1.05061	0.765441	0.702659
2015-01-23	0.67681	1.0958	0.695606	0.659918	0.57412	0.726778	0.483515	0.607302	1.07784	0.506268	0.461943	0.647726	0.417491	1.02872	0.396379	0.689972	1.07303	0.600104	0.657026	0.462213	0.474265	0.808841	0.651747
2015-01-30	0.671097	1.09055	0.587737	0.591362	0.665865	1.17737	0.604038	0.628454	0.973715	0.64864	0.441659	0.576926	0.391945	1.03043	0.540486	0.68403	0.92833	0.58969	0.63742	0.451396	1.00013	0.666749	0.640117
2015-02-06	0.683016	1.09178	0.432841	0.646206	0.599054	0.784905	0.264127	0.608168	0.724933	0.584544	0.456823	0.475709	0.395357	0.902856	0.675213	0.633402	0.785992	0.532181	0.540244	0.45076	0.481547	0.602306	0.614267
2015-02-13	0.678414	1.12468	0.566233	0.702225	0.477127	0.687283	0.255449	0.686017	0.745213	0.500645	0.498573	0.470907	0.538993	0.599207	0.682789	0.614152	0.761896	0.475312	0.488694	0.424037	0.627476	0.643748	0.601819
2015-02-20	0.673661	1.14893	0.592544	0.68755	0.464273	0.90682	1.12381	0.725811	0.863054	0.515198	0.60001	0.57789	1.04404	0.568879	0.624846	0.604845	0.833653	0.468986	0.472374	0.390593	0.740511	0.704837	0.537694
2015-02-27	0.669438	1.17395	0.50645	0.633818	0.662802	1.20412	0.656939	0.689556	0.845104	0.597922	0.695245	0.662312	1.23222	0.746372	0.662525	0.660189	0.859588	0.504625	0.484317	0.358908	0.393196	0.765282	0.439558
2015-03-06	0.66887	1.19501	0.42913	0.6529	0.526656	1.20919	0.32739	0.621738	0.740723	0.697762	0.598583	0.43958	0.962876	0.837653	0.394756	0.603734	0.861756	0.529639	0.491905	0.344706	0.422401	0.824548	0.375763
2015-03-13	0.672209	1.19204	0.482288	0.735322	0.491742	1.01923	0.307365	0.614511	0.917003	0.543219	0.506273	0.425515	0.788802	0.765598	0.251478	0.58169	0.891852	0.466462	0.504443	0.344377	0.799628	0.843166	0.37515
2015-03-20	0.680428	1.12559	0.631519	0.783482	0.538379	2.06673	0.390586	0.613723	0.74896	0.518575	0.478183	0.450779	0.801513	0.705807	0.358113	0.578316	0.887444	0.460345	0.558185	0.359651	1.13784	0.796085	0.390171
2015-03-27	0.671497	1.05026	0.689774	0.715089	0.528502	0.856394	0.399647	0.557691	0.775666	0.954115	0.473662	0.467981	0.650332	0.479125	0.390627	0.458417	0.75012	0.487465	0.560735	0.379753	0.970308	0.852132	0.418625
2015-04-03	0.669349	1.01136	0.551985	0.61115	0.766837	0.838178	0.317989	0.539362	0.88903	0.507187	0.427754	0.431591	0.475795	0.518175	0.361048	0.406703	0.729461	0.545166	0.580577	0.392507	0.699743	0.849101	0.461696
2015-04-10	0.679981	0.9573	0.37237	0.549904	0.580034	1.08426	1.03948	0.507069	0.852076	0.763755	0.388489	0.401369	0.383118	0.521381	0.307303	0.348502	0.668673	0.469394	0.59107	0.389233	0.476915	0.742324	0.433179
2015-04-17	0.692875	0.929985	0.530529	0.620438	0.608095	0.655431	0.302949	0.480689	1.05799	0.478336	0.38897	0.395463	0.270414	0.704095	0.486325	0.422397	0.651132	0.45536	0.533	0.402002	0.543703	0.807531	0.443268
2015-04-24	0.698814	0.971021	0.588258	0.991101	0.973963	1.24977	0.27372	0.430714	1.02078	0.683274	0.431267	0.47508	0.254196	1.01754	0.441214	0.555322	0.731249	0.507875	0.530189	0.439092	0.559888	0.931394	0.50482
2015-05-01	0.684062	0.967487	0.421503	0.54814	0.747673	1.19836	0.401925	0.409799	1.015	0.636581	0.413892	0.471534	0.30339	0.689775	0.669856	0.46342	0.79613	0.506137	0.526238	0.447265	0.408935	0.912127	0.561398
2015-05-08	0.669701	0.946276	0.412928	0.671522	1.06483	0.96509	0.48212	0.538951	1.01489	0.528896	0.387463	0.473974	0.353884	0.756085	0.762025	0.445996	0.628552	0.476965	0.524981	0.431695	1.51687	0.813472	0.512533
2015-05-15	0.653733	0.954858	0.332492	0.749383	0.844679	1.10785	0.418982	0.507082	0.904328	0.780201	0.403163	0.431121	0.347127	0.523436	0.477137	0.425719	0.553234	0.446141	0.489001	0.398196	1.45545	0.826703	0.464937
2015-05-22	0.64138	0.972392	0.423428	0.51098	0.64926	0.864347	0.339123	0.510948	0.725426	0.557944	0.415142	0.3736	0.355697	0.4139	0.279851	0.361652	0.522028	0.402323	0.47267	0.372624	0.534512	0.703158	0.412745
2015-05-29	0.637887	0.92455	0.448733	0.602762	0.695214	1.22263	0.295359	0.702537	0.717893	0.735728	0.425129	0.41431	0.45181	0.52344	0.367729	0.412236	0.55979	0.403135	0.472534	0.366069	0.734798	0.700549	0.411607
2015-06-05	0.635125	0.89977	0.513151	0.67663	0.812165	1.30096	0.371373	0.550658	0.696982	0.598446	0.445844	0.350769	0.40907	0.681573	0.235796	0.554905	0.551484	0.405139	0.470901	0.382904	1.1782	0.647885	0.454943
2015-06-12	0.642774	0.929524	0.542297	0.718108	0.836155	0.713492	0.377061	0.522104	0.790756	0.669495	0.466801	0.336395	0.392439	0.658396	0.202969	0.565233	0.639574	0.454906	0.483272	0.428342	0.921949	0.63106	0.540602
2015-06-19	0.641569	0.969596	0.581384	0.606429	0.70505	0.84255	0.506243	0.542378	0.879615	0.677678	0.502418	0.357564	0.379126	0.674276	0.244508	0.567808	0.696688	0.569383	0.551228	0.458503	0.61871	0.787183	0.508455
2015-06-26	0.634135	0.970908	0.768083	0.7692	0.787685	0.655188	0.975494	0.620575	0.938284	0.887303	0.535638	0.509878	0.336423	0.961658	0.308099	0.657493	0.728908	0.600077	0.606983	0.4985	0.459139	0.995055	0.45473
2015-07-03	0.622149	0.890255	0.58915	0.729322	0.794602	1.01144	0.326473	0.682052	0.985019	0.656765	0.498206	0.5683	0.382729	0.945652	0.391844	0.59523	0.782424	0.638836	0.597713	0.550921	0.460112	1.11108	0.460188
2015-07-10	0.620748	0.827523	0.589134	0.58414	0.70779	0.90778	0.898163	0.633271	1.07114	0.584057	0.453946	0.517709	0.387875	0.989223	0.424248	0.667295	0.757579	0.607857	0.550419	0.550193	0.562607	1.15081	0.437558
2015-07-17	0.622875	0.797706	0.779033	0.539083	0.691688	0.778768	0.522477	0.638682	0.84686	0.627835	0.43826	0.448333	0.391127	0.906007	0.315601	0.652745	0.681812	0.599916	0.558762	0.527843	0.394079	0.849163	0.453582
2015-07-24	0.631996	0.803769	0.745378	0.556083	0.803627	0.592131	0.545173	0.65398	0.75425	0.619486	0.494217	0.482005	0.407082	0.672398	0.294076	0.540787	0.696114	0.566517	0.573067	0.535245	0.794862	0.673807	0.444224
2015-07-31	0.63797	0.813499	0.607882	0.549896	0.738631	0.79119	0.672064	0.558979	0.78497	0.62372	0.501541	0.593537	0.445882	0.543646	0.27071	0.464358	0.663122	0.517418	0.576631	0.535115	0.712771	0.663495	0.407035
2015-08-07	0.652649	0.875558	0.601327	0.711272	0.637591	1.05238	0.263414	0.71924	0.739543	0.51336	0.559615	0.637022	0.422764	0.61528	0.299112	0.489737	0.715223	0.558356	0.561125	0.55357	0.511405	0.643725	0.418447
2015-08-14	0.64928	0.915665	0.641607	0.75847	0.724533	0.714558	0.348439	0.806867	0.672222	0.654699	0.598607	0.673367	0.498552	0.674096	0.306946	0.532027	0.761879	0.626767	0.568943	0.570347	0.440034	0.703254	0.48025
2015-08-21	0.658231	0.948922	0.635918	0.743559	0.629202	1.04362	1.11328	0.642696	0.764357	0.93485	0.555353	0.676933	0.549642	0.683539	0.374411	0.538045	0.850058	0.749631	0.661698	0.599612	0.681895	0.791517	0.473231
2015-08-28	0.662415	0.897317	0.547674	0.849649	0.886556	1.02854	0.452855	0.574327	0.963103	0.740882	0.550246	0.869524	0.663528	1.33185	0.571749	0.640656	0.917844	0.7691	0.800518	0.587565	0.545584	0.72207	0.45696
2015-09-04	0.673093	0.89263	0.580698	0.498787	0.737123	0.63081	0.440734	0.496662	1.04318	0.516004	0.523115	0.686406	0.518414	0.809187	0.442908	0.60587	0.980521	0.655864	0.764768	0.574525	0.650576	0.708373	0.422793
2015-09-11	0.672376	0.92411	0.680286	0.543349	0.767624	0.693129	0.409225	0.503346	0.993543	0.573584	0.527037	0.487622	0.470748	0.797705	0.536901	0.600902	0.904617	0.612689	0.753492	0.58059	0.724644	0.833191	0.42868
2015-09-18	0.675023	0.859275	0.534067	0.600051	0.700314	0.708432	0.845643	0.649415	1.06705	1.29861	0.503955	0.481986	0.552766	0.891136	0.376191	0.616841	0.94278	0.652886	0.818244	0.600064	0.416575	0.793504	0.441276
2015-09-25	0.681734	0.873347	0.525916	0.457964	0.835985	0.955383	0.525033	0.537013	1.14948	0.55683	0.516064	0.542476	0.551834	1.11246	0.268847	0.675682	0.899888	0.716594	0.932176	0.60453	0.517981	0.771319	0.457677
2015-10-02	0.685304	0.89792	0.489069	0.479602	0.700689	0.596786	1.16714	0.589753	1.10044	0.713165	0.543252	0.456738	0.531976	1.10604	0.352841	0.705341	0.865645	0.688173	0.927823	0.595829	0.886316	0.845124	0.502133
2015-10-09	0.689729	0.933135	0.677749	0.498144	0.693528	1.21429	0.471277	0.607218	0.868789	0.536661	0.506444	0.39223	0.584012	0.849602	0.350816	0.637217	0.731171	0.59089	0.891722	0.599486	0.440466	0.688183	0.50246
2015-10-16	0.70394	0.945604	0.607314	0.641853	0.722016	1.03559	0.463548	0.558117	0.795697	0.489595	0.521217	0.357962	0.445272	0.638403	0.257758	0.529214	0.588521	0.518318	0.856837	0.595114	0.559508	0.556292	0.427213
2015-10-23	0.712227	0.866621	0.651146	0.637837	0.692975	0.63638	0.32145	0.594215	0.919651	0.55951	0.531375	0.359417	0.442539	0.587131	0.263542	0.498556	0.592396	0.510024	0.844258	0.562032	0.540438	0.593931	0.434068
2015-10-30	0.723003	0.845683	0.520523	0.569639	0.525641	0.645856	0.811069	0.600102	1.11472	0.826524	0.551657	0.521302	0.553323	0.697873	0.596135	0.504562	0.60869	0.523221	0.795183	0.545141	1.0044	0.783032	0.454924
2015-11-06	0.737496	0.875756	0.539596	0.520933	0.558967	1.05997	0.448127	0.683674	1.33191	0.722971	0.57047	0.49922	1.00036	1.08033	0.881638	0.498094	0.6402	0.513681	0.814752	0.53531	1.05654	0.729936	0.449419
2015-11-13	0.737472	0.915931	0.41788	0.546537	0.784347	1.03965	0.341437	0.48003	1.17806	0.515597	0.441702	0.558031	0.594478	1.01411	0.735027	0.552106	0.744196	0.474016	0.831988	0.523084	0.628463	0.774275	0.454716
2015-11-20	0.734892	0.933003	0.317838	0.6058	0.651601	0.757746	0.398955	0.489493	1.10321	0.585944	0.385375	0.672736	0.478985	1.06643	0.428317	0.661852	0.71261	0.44031	0.80234	0.525118	0.565026	0.959266	0.495296
2015-11-27	0.739676	0.854951	0.373835	0.704432	0.76306	0.582169	0.339035	0.565182	0.894454	0.672729	0.374748	0.621215	0.546671	0.78599	0.294529	0.660263	0.672432	0.433728	0.75149	0.559118	0.51698	0.939989	0.506735
2015-12-04	0.756082	0.787237	0.411583	0.639023	0.784946	0.830523	0.34429	0.594862	0.848821	0.535198	0.426626	0.643056	0.67558	0.927757	0.374639	0.765665	0.69857	0.45122	0.767442	0.606955	0.472507	0.735085	0.476943
2015-12-11	0.777792	0.768845	0.455	0.528116	0.911667	1.02293	0.489342	0.497375	0.884365	0.479449	0.53204	0.644453	0.868636	1.02963	0.362812	0.846043	0.854592	0.460913	0.817548	0.652738	0.651111	0.784506	0.489382
2015-12-18	0.80612	0.744198	0.706314	0.584431	1.08317	0.753806	0.681461	0.638274	0.791359	0.463751	0.629642	0.630948	0.753776	1.23312	0.365102	0.915305	0.835284	0.49007	0.882001	0.661738	0.494613	0.673277	0.493908
2015-12-25	0.845401	0.736189	0.432542	0.491646	0.638246	0.710554	0.270353	0.445147	0.767559	0.516062	0.587681	0.630514	0.782022	1.42279	0.408925	0.892894	0.756257	0.492755	0.782701	0.677029	0.419517	0.590184	0.497221
2016-01-01	0.902061	0.7162	0.384607	0.466045	0.562938	0.897181	0.223375	0.464044	0.899678	0.601734	0.543613	0.634493	0.903739	1.25571	0.421694	0.745967	0.799968	0.593349	0.870172	0.699995	0.438172	0.681247	0.498434
2016-01-08	0.961683	0.715107	0.417513	0.735259	0.889979	1.17451	0.50391	0.451871	0.95277	0.722294	0.569477	0.629268	0.782044	0.795019	0.501714	0.587876	0.795194	0.674986	1.02714	0.705348	0.617038	0.693185	0.570724
2016-01-15	1.00655	0.708202	0.633535	0.51354	0.875217	0.810143	0.420725	0.40576	0.88298	0.584181	0.610641	0.631758	0.791492	0.85566	0.501085	0.6102	0.79002	0.650545	0.885446	0.72658	0.741003	0.717747	0.490833
2016-01-22	1.04581	0.74769	0.623069	0.527084	0.72115	0.884179	0.314435	0.524224	0.919366	0.604507	0.681943	0.755451	1.18993	0.966991	0.548707	0.615435	0.775109	0.64584	0.859022	0.735963	0.924599	0.722567	0.43706
2016-01-29	1.06769	0.826078	0.508777	0.597851	0.602908	1.0728	0.297182	0.567522	1.03154	0.830858	0.697294	0.732544	0.853214	0.5537	0.661536	0.533115	0.740491	0.649218	0.767348	0.69187	1.91088	0.673795	0.460684
2016-02-05	1.04338	0.863665	0.42457	0.824838	0.673713	0.668857	0.289853	0.545584	1.11123	0.43802	0.64034	0.756767	0.801681	0.637605	0.672886	0.503373	0.761504	0.784963	0.790954	0.643374	0.600087	0.858725	0.489883
2016-02-12	0.982658	0.799904	0.519901	0.813816	0.565272	0.801422	0.33815	0.520925	0.912398	0.450796	0.64849	0.952984	0.905513	0.812666	0.600426	0.559757	0.836017	0.894808	0.694439	0.606036	0.959278	1.10389	0.503388
2016-02-19	0.935849	0.758851	0.665389	0.551036	0.698421	1.07493	0.312369	0.697	1.28896	0.618828	0.741284	1.62672	0.968612	0.762002	0.470568	0.654165	0.847034	0.801188	0.62593	0.60366	0.649424	0.970381	0.492915
2016-02-26	0.895042	0.718153	0.52573	0.614327	0.883788	1.02702	0.336026	0.554052	1.24756	0.45531	0.720042	1.16252	0.703558	0.613805	0.286596	0.536362	0.888944	0.750752	0.632819	0.627694	0.694485	0.903938	0.490553
2016-03-04	0.849208	0.710538	0.528364	0.683956	1.0176	1.18662	0.602227	0.467557	0.978147	0.506678	0.646552	0.932699	0.70409	0.483215	0.351904	0.468666	0.840534	0.624339	0.566786	0.632595	0.795101	1.03924	0.420943
2016-03-11	0.818787	0.745	0.445071	0.451513	0.573974	1.08631	1.14796	0.42181	0.876745	0.526104	0.649171	0.856676	1.04658	0.527762	0.307654	0.516756	0.798814	0.575421	0.51498	0.574268	0.584603	0.914188	0.34264
2016-03-18	0.794785	0.760895	0.467237	0.565968	0.549667	0.838745	0.370217	0.498515	0.929039	0.582292	0.660938	0.813008	1.18621	0.778834	0.328152	0.584511	0.677082	0.544745	0.519341	0.520266	0.496094	0.691746	0.319716
2016-03-25	0.768511	0.75821	0.530509	0.562934	0.482112	0.803956	0.290514	0.509033	1.03912	0.406305	0.632674	0.767577	0.951419	0.807796	0.284883	0.606409	0.626655	0.524104	0.474578	0.487858	0.414401	0.559098	0.331796
2016-04-01	0.759571	0.768596	0.851812	0.691143	0.509542	1.01857	0.344288	0.552453	0.991842	0.634202	0.612084	0.657528	0.791323	0.60507	0.327353	0.578215	0.715373	0.555447	0.477359	0.477739	0.894676	0.574546	0.39479
2016-04-08	0.756969	0.794426	0.686207	0.504152	0.435676	1.17532	0.849962	0.588051	1.05559	0.6681	0.607687	0.555544	0.708368	0.830796	0.330782	0.607499	0.774997	0.62867	0.537927	0.479704	0.667971	0.614335	0.433444
2016-04-15	0.766545	0.792303	0.617438	0.789936	0.481211	1.17732	0.876034	0.755575	1.40858	0.46199	0.667014	0.522258	0.642902	0.644564	0.545639	0.653397	0.65444	0.683873	0.622902	0.500646	0.579295	0.651392	0.470736
2016-04-22	0.783963	0.797685	0.607377	1.18658	0.970585	0.963417	0.72785	0.828836	1.14382	0.843227	0.788061	0.733535	0.692461	1.05549	4.38009	0.811558	0.644881	0.831476	0.673497	0.537637	0.532325	0.640527	0.578557
2016-04-29	0.789744	0.804105	0.515169	0.625559	0.754393	1.13926	0.336028	0.701975	1.25457	0.489102	0.748789	0.516167	0.547435	0.746836	1.86248	0.696567	0.654594	0.702475	0.696037	0.543768	0.457171	0.622715	0.550899
2016-05-06	0.809856	0.811841	0.622412	0.680272	0.677115	0.920104	0.834091	0.88097	1.14571	0.673013	0.664525	0.479469	0.444403	0.761235	0.670367	0.613205	0.639505	0.549006	0.723674	0.525962	0.907174	0.756949	0.445594
2016-05-13	0.819591	0.797749	0.686852	0.559517	0.786224	0.762555	0.39813	0.73515	0.812941	0.432801	0.562482	0.440943	0.418782	0.860857	0.279488	0.577016	0.609111	0.505972	0.676235	0.519873	0.708839	0.621501	0.403469
2016-05-20	0.818279	0.789932	0.587181	0.634925	0.696358	0.783642	0.294213	0.662881	0.772196	0.420919	0.496043	0.39328	0.396366	0.873637	0.289945	0.589135	0.602316	0.512734	0.664094	0.527346	0.349378	0.524667	0.415107
2016-05-27	0.817891	0.766375	0.467677	0.630993	0.596133	0.808972	0.360476	0.732717	0.718664	0.696977	0.482321	0.496601	0.418281	1.14124	0.262932	0.698517	0.684828	0.56229	0.657284	0.532406	0.377338	0.451296	0.399581
2016-06-03	0.824325	0.798573	0.552879	0.522866	0.670585	1.05186	0.414371	0.991199	0.889905	0.686015	0.466248	0.487104	0.484961	1.06518	0.244313	0.698775	0.771567	0.624593	0.584939	0.532905	0.360181	0.481985	0.408667
2016-06-10	0.848408	0.812038	0.645944	0.531367	0.756932	0.815509	0.236782	0.677211	0.714289	0.850296	0.47466	0.475663	0.489798	0.761076	0.50637	0.587362	0.842528	0.687643	0.573514	0.548925	0.514617	0.517793	0.428287
2016-06-17	0.896195	0.811154	0.943678	0.595655	0.489696	0.742323	0.399021	0.713576	0.72341	0.551412	0.531	0.556055	0.496044	0.992896	0.46943	0.541864	0.878863	0.767462	0.592091	0.543949	0.636308	0.599165	0.39555
2016-06-24	0.948711	0.851148	0.798357	0.900532	0.523874	0.759682	0.718975	0.851903	0.894635	0.760619	0.54813	0.540746	0.500426	0.969978	0.497509	0.513199	0.849771	0.863576	0.71566	0.555347	0.4652	0.651591	0.448782
2016-07-01	0.915118	0.831288	0.890526	0.852264	0.651897	0.932856	0.754801	1.09444	1.06709	0.861736	0.563061	0.63112	0.573345	0.833608	0.376902	0.54388	0.800178	0.71219	0.657215	0.557224	0.735614	0.862476	0.561706
2016-07-08	0.893179	0.848928	0.873158	0.611486	0.642574	1.11258	0.573356	1.15131	1.12624	0.528989	0.578406	0.65317	0.590681	1.14255	0.432074	0.695496	0.772754	0.597378	0.597633	0.556915	0.575971	0.817788	0.540715
2016-07-15	0.893668	0.832561	0.587879	0.698829	0.581561	0.703614	0.486009	1.00082	0.94874	0.424867	0.565932	0.569575	0.610713	0.88372	0.481138	0.712091	0.685993	0.468239	0.560946	0.549048	0.680178	0.789202	0.477756
2016-07-22	0.883633	0.785261	0.528874	0.711783	0.55436	0.848475	0.526602	0.971935	0.844821	0.907986	0.528778	0.52986	0.474935	0.887608	0.413455	0.658617	0.577898	0.425556	0.575885	0.547234	0.657095	0.770253	0.473218
2016-07-29	0.884826	0.733953	0.424688	0.613404	0.710891	1.57734	0.294868	1.02755	0.929458	0.702346	0.564961	0.525253	0.413143	0.945999	0.379181	0.601061	0.526111	0.438301	0.522411	0.538857	0.58267	0.697802	0.477817
2016-08-05	0.878384	0.693789	0.452654	0.844588	1.02238	1.58392	0.65168	0.711903	1.10679	0.709607	0.638829	0.605223	0.41815	0.608233	0.420553	0.577202	0.496496	0.515173	0.548278	0.500439	0.491679	0.626493	0.490881
2016-08-12	0.86872	0.706773	0.487668	0.83453	0.641181	0.896278	0.559143	0.702147	0.968258	0.921996	0.641793	0.595002	0.553359	0.464878	0.418409	0.576921	0.530596	0.511757	0.594408	0.467887	0.497796	0.752283	0.466012
2016-08-19	0.877556	0.741593	0.59743	0.671003	0.642528	0.924134	0.301761	0.714031	1.01289	1.07164	0.612773	0.585397	0.469241	0.449861	0.303929	0.577359	0.478185	0.442132	0.570274	0.441271	0.738502	0.543152	0.458989
2016-08-26	0.874558	0.698069	0.68454	0.569001	0.895432	0.88779	1.07822	0.796838	0.861328	1.00478	0.572245	0.564199	0.451511	1.05711	0.336154	0.702071	0.491958	0.466807	0.507616	0.421263	0.292684	0.511983	0.446589
2016-09-02	0.874007	0.650997	0.801936	0.715898	0.600537	1.33015	0.703762	1.13054	0.833364	0.960393	0.558551	0.611516	0.4867	1.01496	0.417519	0.70553	0.565267	0.421109	0.47972	0.420041	0.335008	0.531692	0.458
2016-09-09	0.892969	0.61606	0.494647	0.58785	0.624833	0.912982	0.270751	0.904752	0.794897	0.401091	0.5327	0.636968	0.500713	1.0909	0.348362	0.752472	0.643667	0.395907	0.466306	0.426263	0.380309	0.615757	0.430574
2016-09-16	0.882809	0.616927	0.656156	0.693395	0.531554	0.748898	0.532627	0.781184	1.19594	0.404251	0.588904	0.911091	0.550949	0.726386	0.536003	0.724396	0.66571	0.405158	0.478281	0.442336	0.320121	0.723693	0.442573
2016-09-23	0.888013	0.638798	0.705688	0.608822	0.643155	0.759389	0.469632	0.740435	0.931062	0.690762	0.529494	0.746519	0.546985	1.10435	0.641448	0.72348	0.612932	0.408543	0.504005	0.438789	0.316693	0.721782	0.452072
2016-09-30	0.890736	0.668499	0.801669	0.830403	0.992032	0.886746	0.549001	0.733831	0.963795	0.680667	0.47505	0.682987	0.648069	1.11346	0.716603	0.676547	0.610118	0.390804	0.547717	0.442727	0.381725	0.731812	0.426393
2016-10-07	0.889025	0.704689	0.709712	0.546076	0.918899	0.779128	0.804868	0.649021	0.809963	0.607371	0.451319	0.735363	0.485531	1.3766	0.516656	0.670541	0.647523	0.395141	0.522936	0.438849	0.476134	0.773583	0.407564
2016-10-14	0.87806	0.720515	0.70168	0.561979	0.656325	0.884196	0.433383	0.533371	0.611436	0.56194	0.454179	0.750295	0.357521	0.989895	0.291303	0.600781	0.689211	0.433893	0.506791	0.431216	0.696168	0.693257	0.353589
2016-10-21	0.876441	0.771161	0.565854	0.553121	0.719088	0.978288	0.502487	0.524649	0.684781	0.623434	0.400967	0.602348	0.353387	1.05647	0.306841	0.588903	0.681068	0.457903	0.557667	0.44243	0.410156	0.647368	0.348922
2016-10-28	0.899019	0.847607	0.505477	0.586854	0.96297	0.849573	0.355419	0.544169	0.883092	0.544091	0.383813	0.539625	0.456451	1.20109	0.451971	0.592119	0.786371	0.498636	0.645713	0.47587	0.777074	0.662791	0.380907
2016-11-04	0.945308	0.961874	0.671653	0.540632	0.627953	1.04484	0.394061	0.585079	0.910124	0.416897	0.397927	0.550843	0.474391	0.833024	0.430491	0.563464	0.980595	0.619766	0.69486	0.50553	0.417348	0.919463	0.433875
2016-11-11	0.939092	0.964127	0.640449	0.62647	0.587464	0.890027	0.285183	0.628181	0.954276	0.448896	0.440827	0.424308	0.444057	0.558157	0.490224	0.433228	1.13004	0.72984	0.799063	0.534869	1.14521	0.859578	0.480066
2016-11-18	0.930968	0.877042	0.576846	0.574532	0.586905	0.59189	0.381623	0.650479	0.921759	0.510512	0.470125	0.284833	0.434329	0.495741	0.421688	0.352526	1.00226	0.654106	0.751304	0.510854	1.0881	0.911349	0.47315
2016-11-25	0.952975	0.845857	0.484396	0.550363	0.756154	0.666626	0.329348	0.737018	0.742517	0.571181	0.489595	0.255352	0.422747	0.643729	0.378873	0.386226	1.01348	0.603115	0.760479	0.506641	0.802669	0.794046	0.511132
2016-12-02	1.00237	0.824109	0.748767	0.569814	0.811863	0.725995	0.303882	0.584789	0.865122	0.582005	0.467238	0.29758	0.465346	0.705595	0.553035	0.472478	1.01098	0.565112	0.839256	0.520313	0.488736	0.761025	0.573966
2016-12-09	1.07025	0.782229	0.504614	0.491601	0.691617	0.984267	0.274649	0.566319	0.933912	0.632104	0.429195	0.356343	0.361217	0.58184	0.6257	0.510645	0.908619	0.532004	0.870284	0.522035	0.651375	0.82012	0.674036
2016-12-16	1.07887	0.774575	0.367131	0.678649	0.647798	0.889755	0.426894	0.680451	0.928551	0.608999	0.430158	0.362991	0.362803	0.539697	0.361451	0.462524	0.90654	0.537364	0.851456	0.528367	0.477949	0.74052	0.712586
2016-12-23	1.08773	0.777954	0.436583	0.54756	0.655111	0.696982	0.366514	0.537084	0.71165	0.399402	0.396459	0.385799	0.386678	0.343071	0.212993	0.412598	0.779252	0.508004	0.678965	0.518302	0.256371	0.781897	0.562351
2016-12-30	1.09198	0.729743	0.444558	0.636186	0.633114	0.770845	0.293063	0.597988	0.878147	0.439787	0.363482	0.36989	0.328985	0.348992	0.246704	0.441795	0.78278	0.553031	0.650329	0.513234	0.240744	0.741396	0.546336
2017-01-06	1.11055	0.696015	0.466295	0.557071	0.686566	1.13618	1.23864	0.598697	0.664128	0.489906	0.340114	0.427268	0.39216	0.465855	0.568304	0.504137	0.828342	0.58939	0.662939	0.520598	0.41188	0.754195	0.504149
2017-01-13	1.11121	0.676776	0.446676	0.487198	0.767394	0.853987	0.259885	0.607319	0.619161	0.394185	0.347642	0.373681	0.393081	0.437587	0.83478	0.446385	0.858355	0.565876	0.619026	0.530607	0.600769	0.841722	0.474136
2017-01-20	1.09334	0.681487	0.490914	0.522119	0.740636	0.978956	0.286925	0.586365	0.760135	0.567327	0.355956	0.368167	0.346806	0.471938	0.396726	0.418105	0.844829	0.544878	0.639161	0.526351	0.781467	0.791458	0.43715
2017-01-27	1.09531	0.690571	0.366481	0.53787	0.679626	1.41137	0.318826	0.593483	0.611611	0.589271	0.388155	0.400903	0.397794	0.48748	0.338701	0.423045	0.851048	0.562112	0.631237	0.516294	0.464097	0.759349	0.422513
2017-02-03	1.10849	0.704801	0.397956	0.461027	0.621072	0.909759	0.266347	0.617391	0.780502	0.589166	0.434724	0.459755	0.420592	0.709442	0.424706	0.424403	0.88577	0.563577	0.534011	0.502006	0.440008	0.748436	0.391038
2017-02-10	1.14633	0.678401	0.431249	0.552006	0.804872	0.757093	0.564789	0.528742	0.76161	0.591756	0.441985	0.443887	0.405482	0.55312	0.464416	0.350676	1.00292	0.543392	0.447247	0.524059	0.628751	0.747261	0.350207
2017-02-17	1.17847	0.669847	0.461841	0.455268	0.72417	0.685267	0.360919	0.55509	0.748286	0.475798	0.444937	0.453029	0.421767	0.496187	0.472856	0.352097	0.906199	0.512237	0.395182	0.47851	0.355873	0.694026	0.323988
2017-02-24	1.19521	0.69192	0.406149	0.47206	0.665447	1.06143	0.583273	0.518268	0.95822	0.457703	0.421472	0.442946	0.42602	0.399388	0.452061	0.406571	0.859062	0.522263	0.369874	0.442519	0.582525	0.79445	0.310028
2017-03-03	1.21168	0.660504	0.395785	0.528411	0.591537	1.13013	0.497063	0.440509	0.860804	0.472108	0.375432	0.458484	0.362083	0.406036	0.38598	0.410353	0.745872	0.477673	0.390956	0.423258	0.899337	0.809712	0.291066
2017-03-10	1.23344	0.619922	0.525917	0.538476	0.717856	0.703681	0.274528	0.41686	0.756734	0.558555	0.367838	0.433017	0.342923	0.335788	0.222434	0.355077	0.703678	0.42133	0.403398	0.403032	0.348117	0.786142	0.274788
2017-03-17	1.24399	0.611201	0.420788	0.549821	0.764446	0.712643	0.371429	0.439817	0.760109	0.432062	0.385402	0.394771	0.33621	0.44046	0.240271	0.310622	0.70242	0.420655	0.433234	0.391956	0.574726	0.617035	0.260483
2017-03-24	1.22943	0.620546	0.413203	0.603396	0.840738	1.01904	0.41748	0.496431	0.787263	0.517649	0.379454	0.351974	0.359704	0.532866	0.299863	0.335396	0.724294	0.404656	0.499033	0.397961	0.490505	0.640292	0.289045
2017-03-31	1.22344	0.598681	0.716796	0.649709	0.68916	1.14991	0.389535	0.574993	0.7827	0.474002	0.397558	0.419455	0.485312	0.524144	0.446162	0.414613	0.75243	0.443636	0.479632	0.411622	0.29478	0.662048	0.311327
2017-04-07	1.26085	0.619226	0.586589	0.569966	0.613681	1.00601	0.310847	0.46886	0.737374	0.380352	0.4244	0.437031	0.475566	0.54956	0.39684	0.371615	0.73401	0.494385	0.460496	0.430899	0.367823	0.779689	0.308241
2017-04-14	1.27836	0.68714	0.421755	0.610358	0.615857	0.725966	0.243104	0.476433	0.705295	0.453497	0.397311	0.374717	0.345995	0.598755	0.409641	0.379007	0.730274	0.4363	0.46336	0.447104	0.459939	0.764256	0.300057
2017-04-21	1.30355	0.784996	0.462055	0.647126	0.54057	0.917992	0.293745	0.604878	0.820786	0.536931	0.405027	0.387751	0.404455	0.716128	0.382442	0.473542	0.745999	0.412002	0.490525	0.44832	1.0287	0.667282	0.34125
2017-04-28	1.31707	0.768378	0.729493	0.74116	0.721043	1.0277	0.314851	0.574548	1.21576	0.807663	0.418966	0.44587	0.464706	0.876634	0.43932	0.655246	0.789088	0.410029	0.498942	0.443547	0.506135	0.559542	0.351067
2017-05-05	1.34424	0.771921	0.712781	0.676941	0.851653	0.887091	0.257253	0.615964	0.873338	0.692191	0.389562	0.440765	0.42757	1.31848	0.749481	0.842695	0.790511	0.451483	0.527753	0.441397	0.528825	0.560173	0.330121
2017-05-12	1.34169	0.780423	0.483972	1.04982	1.11268	0.824911	0.397022	0.61076	0.935244	0.625227	0.375804	0.368062	0.347837	0.935092	0.699999	0.708755	0.662588	0.441065	0.61227	0.452465	0.376965	0.553983	0.342658
[truncated: 254 more rows]
