# Supplementary material for: Response of commodity markets to global warming attention
Source: Research Square preprint supplement (doi:10.21203/rs.3.rs-4567325/v1), 2024-06-24
Supplement: Supplementary file 7 [file Global abnormal weekly temperature.xlsx]

## Sheet: Sheet1
	Ab_Temp
2011-01-07	1.799
2011-01-14	0.7
2011-01-21	-0.215
2011-01-28	1.853
2011-02-04	0.701
2011-02-11	-0.331
2011-02-18	2.508
2011-02-25	-0.064
2011-03-04	0.687
2011-03-11	1.366
2011-03-18	2.347
2011-03-25	-0.028
2011-04-01	1.846
2011-04-08	2.145
2011-04-15	0.518
2011-04-22	1.145
2011-04-29	0.844
2011-05-06	0.554
2011-05-13	1.246
2011-05-20	1.092
2011-05-27	0.274
2011-06-03	1.349
2011-06-10	0.877
2011-06-17	0.802
2011-06-24	0.434
2011-07-01	0.595
2011-07-08	1.3
2011-07-15	0.465
2011-07-22	1.308
2011-07-29	1.386
2011-08-05	1.455
2011-08-12	0.438
2011-08-19	1.062
2011-08-26	1.988
2011-09-02	1.506
2011-09-09	0.537
2011-09-16	-1.077
2011-09-23	0.973
2011-09-30	1.654
2011-10-07	0.915
2011-10-14	1.486
2011-10-21	0.296
2011-10-28	-0.178
2011-11-04	0.143
2011-11-11	-0.199
2011-11-18	-0.614
2011-11-25	1.213
2011-12-02	0.031
2011-12-09	-0.327
2011-12-16	1.355
2011-12-23	0.846
2011-12-30	1.991
2012-01-06	2.014
2012-01-13	-0.277
2012-01-20	-0.054
2012-01-27	0.916
2012-02-03	-0.249
2012-02-10	-0.955
2012-02-17	1.419
2012-02-24	1.701
2012-03-02	0.579
2012-03-09	-0.119
2012-03-16	2.505
2012-03-23	2.15
2012-03-30	1.77
2012-04-06	0.263
2012-04-13	0.502
2012-04-20	1.703
2012-04-27	1.064
2012-05-04	2.291
2012-05-11	1.061
2012-05-18	0.809
2012-05-25	1.36
2012-06-01	0.669
2012-06-08	0.608
2012-06-15	1.151
2012-06-22	1.283
2012-06-29	2.137
2012-07-06	1.538
2012-07-13	0.797
2012-07-20	0.343
2012-07-27	1.093
2012-08-03	1.139
2012-08-10	0.612
2012-08-17	0.732
2012-08-24	0.708
2012-08-31	1.056
2012-09-07	1.361
2012-09-14	0.235
2012-09-21	0.764
2012-09-28	1.541
2012-10-05	0.994
2012-10-12	0.221
2012-10-19	1.936
2012-10-26	0.208
2012-11-02	1.1
2012-11-09	0.686
2012-11-16	0.183
2012-11-23	1.368
2012-11-30	0.887
2012-12-07	0.621
2012-12-14	0.071
2012-12-21	-0.398
2012-12-28	-0.544
2013-01-04	0.314
2013-01-11	1.718
2013-01-18	0.389
2013-01-25	0.715
2013-02-01	1.444
2013-02-08	1.361
2013-02-15	1.428
2013-02-22	-0.119
2013-03-01	1.385
2013-03-08	2.094
2013-03-15	1.721
2013-03-22	-0.78
2013-03-29	1.441
2013-04-05	0.762
2013-04-12	0.893
2013-04-19	0.474
2013-04-26	1.295
2013-05-03	0.531
2013-05-10	1.845
2013-05-17	1.725
2013-05-24	-0.132
2013-05-31	1.806
2013-06-07	1.074
2013-06-14	0.967
2013-06-21	1.061
2013-06-28	1.402
2013-07-05	1.349
2013-07-12	0.45
2013-07-19	1.324
2013-07-26	0.46
2013-08-02	0.799
2013-08-09	0.465
2013-08-16	0.453
2013-08-23	1.054
2013-08-30	1.887
2013-09-06	1.58
2013-09-13	1.267
2013-09-20	1.068
2013-09-27	0.325
2013-10-04	0.749
2013-10-11	0.653
2013-10-18	0.384
2013-10-25	0.5
2013-11-01	2.255
2013-11-08	1.39
2013-11-15	1.568
2013-11-22	0.546
2013-11-29	0.33
2013-12-06	-0.86
2013-12-13	-0.225
2013-12-20	1.729
2013-12-27	2.191
2014-01-03	0.845
2014-01-10	2.412
2014-01-17	2.211
2014-01-24	-0.749
2014-01-31	0.188
2014-02-07	-1.513
2014-02-14	1.378
2014-02-21	1.935
2014-02-28	-0.421
2014-03-07	1.019
2014-03-14	1.83
2014-03-21	2.036
2014-03-28	1.598
2014-04-04	1.221
2014-04-11	2.597
2014-04-18	0.837
2014-04-25	1.409
2014-05-02	0.959
2014-05-09	1.469
2014-05-16	0.788
2014-05-23	2.103
2014-05-30	1.438
2014-06-06	1.415
2014-06-13	0.725
2014-06-20	0.467
2014-06-27	0.546
2014-07-04	0.627
2014-07-11	0.652
2014-07-18	0.069
2014-07-25	0.566
2014-08-01	0.743
2014-08-08	0.941
2014-08-15	0.379
2014-08-22	0.925
2014-08-29	0.906
2014-09-05	1.557
2014-09-12	-0.134
2014-09-19	1.092
2014-09-26	1.177
2014-10-03	0.537
2014-10-10	1.172
2014-10-17	1.361
2014-10-24	1.384
2014-10-31	0.966
2014-11-07	0.947
2014-11-14	-1.255
2014-11-21	0.256
2014-11-28	-0.09
2014-12-05	1.352
2014-12-12	1.87
2014-12-19	1.391
2014-12-26	1.238
2015-01-02	0.411
2015-01-09	-0.298
2015-01-16	2.209
2015-01-23	1.695
2015-01-30	2.032
2015-02-06	1.323
2015-02-13	1.989
2015-02-20	0.81
2015-02-27	-0.726
2015-03-06	-0.319
2015-03-13	2.766
2015-03-20	2.055
2015-03-27	1.602
2015-04-03	1.338
2015-04-10	1.851
2015-04-17	1.968
2015-04-24	0.429
2015-05-01	1.321
2015-05-08	1.592
2015-05-15	0.645
2015-05-22	-0.151
2015-05-29	1.247
2015-06-05	1.415
2015-06-12	1.587
2015-06-19	0.81
2015-06-26	1.344
2015-07-03	1.478
2015-07-10	0.062
2015-07-17	0.741
2015-07-24	0.788
2015-07-31	0.685
2015-08-07	1.183
2015-08-14	1.46
2015-08-21	0.545
2015-08-28	0.708
2015-09-04	0.602
2015-09-11	0.629
2015-09-18	1.024
2015-09-25	1.439
2015-10-02	0.359
2015-10-09	1.695
2015-10-16	1.24
2015-10-23	1.797
2015-10-30	1.134
2015-11-06	2.402
2015-11-13	1.46
2015-11-20	0.817
2015-11-27	0.522
2015-12-04	1.19
2015-12-11	2.751
2015-12-18	0.759
2015-12-25	2.823
2016-01-01	0.71
2016-01-08	1.925
2016-01-15	1.964
2016-01-22	0.566
2016-01-29	2.928
2016-02-05	1.459
2016-02-12	1.261
2016-02-19	2.847
2016-02-26	1.692
2016-03-04	1.973
2016-03-11	3.483
2016-03-18	1.701
2016-03-25	1.21
2016-04-01	2.394
2016-04-08	2.02
2016-04-15	2.146
2016-04-22	2.584
2016-04-29	0.759
2016-05-06	2.066
2016-05-13	1.805
2016-05-20	0.67
2016-05-27	1.574
2016-06-03	1.818
2016-06-10	0.958
2016-06-17	0.721
2016-06-24	1.506
2016-07-01	0.741
2016-07-08	1.058
2016-07-15	0.224
2016-07-22	1.925
2016-07-29	1.43
2016-08-05	1.251
2016-08-12	1.337
2016-08-19	1.54
2016-08-26	1.551
2016-09-02	0.762
2016-09-09	1.834
2016-09-16	1.053
2016-09-23	1.054
2016-09-30	0.757
2016-10-07	0.277
2016-10-14	0.261
2016-10-21	0.567
2016-10-28	1.728
2016-11-04	1.691
2016-11-11	0.997
2016-11-18	1.369
2016-11-25	0.775
2016-12-02	0.879
2016-12-09	-0.599
2016-12-16	-0.94
2016-12-23	2.311
2016-12-30	2.261
2017-01-06	-2.14
2017-01-13	1.862
2017-01-20	2.852
2017-01-27	1.075
2017-02-03	0.992
2017-02-10	0.776
2017-02-17	2.304
2017-02-24	2.184
2017-03-03	0.95
2017-03-10	2.058
2017-03-17	2.096
2017-03-24	2.16
2017-03-31	2.41
2017-04-07	1.648
2017-04-14	2.245
2017-04-21	1.314
2017-04-28	0.412
2017-05-05	1.399
2017-05-12	1.462
2017-05-19	1.54
2017-05-26	1.308
2017-06-02	1.225
2017-06-09	0.769
2017-06-16	1.515
2017-06-23	1.354
2017-06-30	0.645
2017-07-07	1.823
2017-07-14	0.759
2017-07-21	1.269
2017-07-28	1.185
2017-08-04	1.228
2017-08-11	0.896
2017-08-18	1.55
2017-08-25	0.469
2017-09-01	0.521
2017-09-08	0.127
2017-09-15	0.493
2017-09-22	1.409
2017-09-29	0.835
2017-10-06	1.247
2017-10-13	1.242
2017-10-20	1.934
2017-10-27	0.9
2017-11-03	1.542
2017-11-10	-0.237
2017-11-17	0.805
2017-11-24	2.145
2017-12-01	1.851
2017-12-08	0.361
2017-12-15	0.946
2017-12-22	1.926
2017-12-29	0.211
2018-01-05	0.424
2018-01-12	1.709
2018-01-19	1.665
2018-01-26	1.745
2018-02-02	0.851
2018-02-09	0.776
2018-02-16	2.91
2018-02-23	0.586
2018-03-02	1.144
2018-03-09	1.623
2018-03-16	1.349
2018-03-23	1.524
2018-03-30	2.01
2018-04-06	0.807
2018-04-13	2.388
2018-04-20	1.552
2018-04-27	1.658
2018-05-04	2.137
2018-05-11	1.226
2018-05-18	0.514
2018-05-25	1.981
2018-06-01	1.807
2018-06-08	1.622
2018-06-15	0.89
2018-06-22	0.494
2018-06-29	1.47
2018-07-06	1.389
2018-07-13	1.242
2018-07-20	1.301
2018-07-27	1.363
2018-08-03	1.432
2018-08-10	1.243
2018-08-17	1.28
2018-08-24	0.164
2018-08-31	0.666
2018-09-07	0.815
2018-09-14	1.063
2018-09-21	1.444
2018-09-28	0.395
2018-10-05	0.861
2018-10-12	0.877
2018-10-19	1.325
2018-10-26	1.366
2018-11-02	1.983
2018-11-09	-0.406
2018-11-16	0.17
2018-11-23	0.504
2018-11-30	1.723
2018-12-07	-0.041
2018-12-14	1.231
2018-12-21	2.615
2018-12-28	1.518
2019-01-04	2.357
2019-01-11	1.156
2019-01-18	1.865
2019-01-25	0.767
2019-02-01	0.759
2019-02-08	0.572
2019-02-15	2.368
2019-02-22	1.445
2019-03-01	1.434
2019-03-08	1.566
2019-03-15	2.92
2019-03-22	2.702
2019-03-29	2.74
2019-04-05	2.248
2019-04-12	0.641
2019-04-19	2.592
2019-04-26	2.16
2019-05-03	1.285
2019-05-10	0.873
2019-05-17	1.507
2019-05-24	1.41
2019-05-31	1.482
2019-06-07	1.542
2019-06-14	0.933
2019-06-21	0.679
2019-06-28	1.668
2019-07-05	1.152
2019-07-12	1.203
2019-07-19	1.49
2019-07-26	1.526
2019-08-02	0.935
2019-08-09	1
2019-08-16	0.729
2019-08-23	0.931
2019-08-30	1.259
2019-09-06	0.963
2019-09-13	1.055
2019-09-20	0.76
2019-09-27	1.934
2019-10-04	0.63
2019-10-11	0.456
2019-10-18	1.484
2019-10-25	1.981
2019-11-01	0.027
2019-11-08	0.119
2019-11-15	0.683
2019-11-22	1.51
2019-11-29	0.976
2019-12-06	1.265
2019-12-13	1.483
2019-12-20	1.541
2019-12-27	2.261
2020-01-03	3.365
2020-01-10	2.262
2020-01-17	0.859
2020-01-24	2.494
2020-01-31	2.859
2020-02-07	1.643
2020-02-14	0.885
2020-02-21	0.918
2020-02-28	1
2020-03-06	1.964
2020-03-13	2.535
2020-03-20	2.333
2020-03-27	2.353
2020-04-03	0.557
2020-04-10	1.611
2020-04-17	0.856
2020-04-24	2.258
2020-05-01	2.347
2020-05-08	0.954
2020-05-15	1.199
2020-05-22	1.5
2020-05-29	2.286
2020-06-05	2.163
2020-06-12	1.396
2020-06-19	1.213
2020-06-26	1.776
2020-07-03	1.144
2020-07-10	1.507
2020-07-17	1.06
2020-07-24	0.869
2020-07-31	1.623
2020-08-07	1.043
2020-08-14	1.467
2020-08-21	1.462
2020-08-28	1.52
2020-09-04	1.963
2020-09-11	0.646
2020-09-18	0.981
2020-09-25	1.618
2020-10-02	1.024
2020-10-09	2.089
2020-10-16	0.481
2020-10-23	1.374
2020-10-30	0.672
2020-11-06	3.118
2020-11-13	0.885
2020-11-20	1.573
2020-11-27	1.468
2020-12-04	0.795
2020-12-11	1.342
2020-12-18	0.719
2020-12-25	0.582
2021-01-01	0.906
2021-01-08	0.679
2021-01-15	1.631
2021-01-22	2.194
2021-01-29	0.771
2021-02-05	1.729
2021-02-12	-1.595
2021-02-19	-0.362
2021-02-26	2.118
2021-03-05	1.698
2021-03-12	2.578
2021-03-19	0.685
2021-03-26	2.35
2021-04-02	1.17
2021-04-09	2.144
2021-04-16	0.267
2021-04-23	0.154
2021-04-30	2.149
2021-05-07	0.582
2021-05-14	1.284
2021-05-21	1.453
2021-05-28	0.464
2021-06-04	2.426
2021-06-11	1.261
2021-06-18	1.57
2021-06-25	0.865
2021-07-02	0.986
2021-07-09	1.288
2021-07-16	1.396
2021-07-23	1.018
2021-07-30	1.316
2021-08-06	0.924
2021-08-13	1.888
2021-08-20	0.963
2021-08-27	1.1
2021-09-03	0.582
2021-09-10	1.459
2021-09-17	1.374
2021-09-24	0.781
2021-10-01	1.155
2021-10-08	1.782
2021-10-15	1.009
2021-10-22	1.219
2021-10-29	1.904
2021-11-05	0.892
2021-11-12	1.469
2021-11-19	1.036
2021-11-26	0.253
2021-12-03	2.034
2021-12-10	1.385
2021-12-17	1.561
2021-12-24	1.611
2021-12-31	2.457
2022-01-07	1.211
2022-01-14	1.888
2022-01-21	1.266
2022-01-28	0.805
2022-02-04	0.679
2022-02-11	1.429
2022-02-18	0.947
2022-02-25	1.777
2022-03-04	2.009
2022-03-11	1.054
2022-03-18	2.007
2022-03-25	1.492
