# Supplementary material for: Response of commodity markets to global warming attention
Source: Research Square preprint supplement (doi:10.21203/rs.3.rs-4567325/v1), 2024-06-24
Supplement: Supplementary file 9 [file Global warming attention index.xlsx]

## Sheet: Sheet1
	SVI
2011-01-07	38.08
2011-01-14	57.8
2011-01-21	51.68
2011-01-28	43.52
2011-02-04	45.1
2011-02-11	54.94
2011-02-18	64.78
2011-02-25	55.76
2011-03-04	59.15
2011-03-11	71.89
2011-03-18	71.89
2011-03-25	75.53
2011-04-01	51.68
2011-04-08	56.24
2011-04-15	44.84
2011-04-22	31.92
2011-04-29	41.8
2011-05-06	51.87
2011-05-13	57.33
2011-05-20	57.33
2011-05-27	63.7
2011-06-03	55.38
2011-06-10	54.6
2011-06-17	45.24
2011-06-24	28.86
2011-07-01	29.26
2011-07-08	34.2
2011-07-15	28.88
2011-07-22	28.88
2011-07-29	31.92
2011-08-05	27.28
2011-08-12	24.18
2011-08-19	37.2
2011-08-26	39.68
2011-09-02	52.7
2011-09-09	43.35
2011-09-16	49.3
2011-09-23	53.55
2011-09-30	54.4
2011-10-07	56.1
2011-10-14	57.8
2011-10-21	69.7
2011-10-28	56.95
2011-11-04	61
2011-11-11	62
2011-11-18	63
2011-11-25	74
2011-12-02	46.08
2011-12-09	38.4
2011-12-16	22.4
2011-12-23	19.2
2011-12-30	17.28
2012-01-06	42.21
2012-01-13	44.73
2012-01-20	45.36
2012-01-27	45.36
2012-02-03	42.92
2012-02-10	60.68
2012-02-17	53.28
2012-02-24	51.06
2012-03-02	53.9
2012-03-09	48.51
2012-03-16	53.13
2012-03-23	51.59
2012-03-30	42.35
2012-04-06	21.42
2012-04-13	36.54
2012-04-20	39.06
2012-04-27	34.65
2012-05-04	45.36
2012-05-11	46.17
2012-05-18	55.89
2012-05-25	51.84
2012-06-01	40.3
2012-06-08	46.5
2012-06-15	40.3
2012-06-22	33.48
2012-06-29	25.42
2012-07-06	20.52
2012-07-13	28.44
2012-07-20	20.16
2012-07-27	24.84
2012-08-03	20.68
2012-08-10	21.15
2012-08-17	23.03
2012-08-24	28.67
2012-08-31	32.43
2012-09-07	34.22
2012-09-14	37.17
2012-09-21	42.48
2012-09-28	41.3
2012-10-05	40.7
2012-10-12	30.8
2012-10-19	37.95
2012-10-26	39.05
2012-11-02	37.76
2012-11-09	40.32
2012-11-16	37.76
2012-11-23	50.56
2012-11-30	47.36
2012-12-07	27.09
2012-12-14	19.35
2012-12-21	17.2
2012-12-28	13.33
2013-01-04	19.78
2013-01-11	30.53
2013-01-18	31.39
2013-01-25	30.96
2013-02-01	31.32
2013-02-08	31.32
2013-02-15	32.4
2013-02-22	37.26
2013-03-01	33.48
2013-03-08	37.8
2013-03-15	41.04
2013-03-22	35.64
2013-03-29	27
2013-04-05	31.86
2013-04-12	38.35
2013-04-19	39.53
2013-04-26	38.35
2013-05-03	34.98
2013-05-10	31.02
2013-05-17	40.92
2013-05-24	42.9
2013-05-31	34.98
2013-06-07	36.21
2013-06-14	31.11
2013-06-21	21.42
2013-06-28	19.89
2013-07-05	19.17
2013-07-12	19.71
2013-07-19	20.25
2013-07-26	18.36
2013-08-02	16.81
2013-08-09	20.09
2013-08-16	20.09
2013-08-23	26.65
2013-08-30	29.52
2013-09-06	29.68
2013-09-13	32.86
2013-09-20	36.04
2013-09-27	39.75
2013-10-04	29.5
2013-10-11	31.5
2013-10-18	32
2013-10-25	34.5
2013-11-01	27.44
2013-11-08	37.52
2013-11-15	34.16
2013-11-22	38.08
2013-11-29	34.16
2013-12-06	28.12
2013-12-13	19.24
2013-12-20	13.69
2013-12-27	8.14
2014-01-03	16.4
2014-01-10	24
2014-01-17	24
2014-01-24	28
2014-01-31	24.4
2014-02-07	31.8
2014-02-14	34.45
2014-02-21	40.28
2014-02-28	33.39
2014-03-07	32.64
2014-03-14	32.64
2014-03-21	32.64
2014-03-28	34.68
2014-04-04	31.74
2014-04-11	24.84
2014-04-18	16.56
2014-04-25	29.44
2014-05-02	26.66
2014-05-09	27.9
2014-05-16	32.86
2014-05-23	37.82
2014-05-30	35.34
2014-06-06	31.72
2014-06-13	26.52
2014-06-20	17.68
2014-06-27	19.76
2014-07-04	14.04
2014-07-11	13.78
2014-07-18	16.64
2014-07-25	14.04
2014-08-01	17.48
2014-08-08	19.38
2014-08-15	19
2014-08-22	26.22
2014-08-29	25.84
2014-09-05	30.6
2014-09-12	29.07
2014-09-19	31.62
2014-09-26	29.58
2014-10-03	27
2014-10-10	29.25
2014-10-17	29.7
2014-10-24	29.7
2014-10-31	26.1
2014-11-07	34.56
2014-11-14	32.94
2014-11-21	31.32
2014-11-28	31.32
2014-12-05	25.2
2014-12-12	16.8
2014-12-19	9.1
2014-12-26	8.05
2015-01-02	11.22
2015-01-09	17
2015-01-16	18.02
2015-01-23	21.76
2015-01-30	21.76
2015-02-06	27.72
2015-02-13	24.2
2015-02-20	28.6
2015-02-27	29.04
2015-03-06	34
2015-03-13	31
2015-03-20	30.5
2015-03-27	26.5
2015-04-03	20.28
2015-04-10	31.2
2015-04-17	34.32
2015-04-24	37.44
2015-05-01	22.32
2015-05-08	31
2015-05-15	29.76
2015-05-22	42.16
2015-05-29	37.2
2015-06-05	34.68
2015-06-12	30.09
2015-06-19	30.6
2015-06-26	16.32
2015-07-03	19.76
2015-07-10	14.3
2015-07-17	15.34
2015-07-24	12.48
2015-07-31	13.78
2015-08-07	16.45
2015-08-14	17.15
2015-08-21	21.7
2015-08-28	23.1
2015-09-04	29.4
2015-09-11	35.28
2015-09-18	36.75
2015-09-25	36.75
2015-10-02	30.36
2015-10-09	28.98
2015-10-16	33.58
2015-10-23	32.66
2015-10-30	31.74
2015-11-06	29.89
2015-11-13	30.5
2015-11-20	31.72
2015-11-27	27.45
2015-12-04	30
2015-12-11	23
2015-12-18	18
2015-12-25	13
2016-01-01	15.2
2016-01-08	24
2016-01-15	22.8
2016-01-22	24.4
2016-01-29	23.6
2016-02-05	30.24
2016-02-12	30.24
2016-02-19	35.52
2016-02-26	33.6
2016-03-04	29.61
2016-03-11	34.78
2016-03-18	27.73
2016-03-25	18.8
2016-04-01	26.01
2016-04-08	33.66
2016-04-15	34.17
2016-04-22	35.19
2016-04-29	31.62
2016-05-06	28.6
2016-05-13	38.35
2016-05-20	46.8
2016-05-27	35.1
2016-06-03	30.36
2016-06-10	20.68
2016-06-17	22.44
2016-06-24	14.52
2016-07-01	18.04
2016-07-08	14.52
2016-07-15	13.64
2016-07-22	13.86
2016-07-29	14.3
2016-08-05	15.5
2016-08-12	16.43
2016-08-19	18.6
2016-08-26	19.22
2016-09-02	22
2016-09-09	26.4
2016-09-16	21.2
2016-09-23	27.2
2016-09-30	24.4
2016-10-07	29.25
2016-10-14	30.15
2016-10-21	26.1
2016-10-28	29.7
2016-11-04	37.52
2016-11-11	34.72
2016-11-18	38.64
2016-11-25	33.6
2016-12-02	35
2016-12-09	16.8
2016-12-16	15.4
2016-12-23	9.8
2016-12-30	8.4
2017-01-06	21.09
2017-01-13	26.64
2017-01-20	29.23
2017-01-27	27.75
2017-02-03	29.92
2017-02-10	32.12
2017-02-17	29.48
2017-02-24	27.72
2017-03-03	32.33
2017-03-10	35.51
2017-03-17	33.92
2017-03-24	37.63
2017-03-31	37.1
2017-04-07	26.79
2017-04-14	20.68
2017-04-21	31.02
2017-04-28	29.61
2017-05-05	27.45
2017-05-12	29.28
2017-05-19	30.5
2017-05-26	24.4
2017-06-02	50
2017-06-09	29.5
2017-06-16	21.5
2017-06-23	19.5
2017-06-30	15.5
2017-07-07	19.5
2017-07-14	20.02
2017-07-21	17.94
2017-07-28	19.5
2017-08-04	20.88
2017-08-11	19.44
2017-08-18	20.16
2017-08-25	25.2
2017-09-01	26.22
2017-09-08	34.04
2017-09-15	28.06
2017-09-22	28.98
2017-09-29	32.2
2017-10-06	27.45
2017-10-13	27.9
2017-10-20	32.85
2017-10-27	31.05
2017-11-03	31.27
2017-11-10	40.81
2017-11-17	38.69
2017-11-24	41.87
2017-12-01	23.8
2017-12-08	24.48
2017-12-15	22.1
2017-12-22	10.2
2017-12-29	17
2018-01-05	23.18
2018-01-12	28.12
2018-01-19	31.16
2018-01-26	25.46
2018-02-02	23.4
2018-02-09	27.9
2018-02-16	25.65
2018-02-23	26.55
2018-03-02	38.34
2018-03-09	37.26
2018-03-16	35.64
2018-03-23	37.26
2018-03-30	24.84
2018-04-06	34.17
2018-04-13	30.6
2018-04-20	32.13
2018-04-27	33.15
2018-05-04	28.6
2018-05-11	31.35
2018-05-18	29.7
2018-05-25	33.55
2018-06-01	24.79
2018-06-08	22.94
2018-06-15	17.76
2018-06-22	13.32
2018-06-29	12.95
2018-07-06	11.89
2018-07-13	14.79
2018-07-20	17.11
2018-07-27	21.17
2018-08-03	29.26
2018-08-10	23.94
2018-08-17	21.28
2018-08-24	29.64
2018-08-31	28.88
2018-09-07	25.01
2018-09-14	26.65
2018-09-21	25.42
2018-09-28	27.47
2018-10-05	25.48
2018-10-12	30.38
2018-10-19	33.32
2018-10-26	28.91
2018-11-02	32.86
2018-11-09	39.75
2018-11-16	40.28
2018-11-23	36.04
2018-11-30	36.04
2018-12-07	22.75
2018-12-14	18.2
2018-12-21	15.4
2018-12-28	10.5
2019-01-04	16.65
2019-01-11	24.05
2019-01-18	25.16
2019-01-25	24.42
2019-02-01	21.07
2019-02-08	19.11
2019-02-15	20.58
2019-02-22	27.44
2019-03-01	29.64
2019-03-08	25.65
2019-03-15	51.3
2019-03-22	35.34
2019-03-29	37.62
2019-04-05	34.68
2019-04-12	34.17
2019-04-19	24.99
2019-04-26	35.7
2019-05-03	37.4
2019-05-10	37.4
2019-05-17	44.88
2019-05-24	46.24
2019-05-31	36.04
2019-06-07	33.5
2019-06-14	31.5
2019-06-21	29.5
2019-06-28	29
2019-07-05	23.31
2019-07-12	23.31
2019-07-19	25.16
2019-07-26	29.6
2019-08-02	30.74
2019-08-09	33.39
2019-08-16	33.92
2019-08-23	40.28
2019-08-30	33.39
2019-09-06	27.06
2019-09-13	25.74
2019-09-20	34.98
2019-09-27	47.52
2019-10-04	40.47
2019-10-11	36.48
2019-10-18	36.48
2019-10-25	38.19
2019-11-01	36.54
2019-11-08	44.08
2019-11-15	35.96
2019-11-22	44.66
2019-11-29	42.92
2019-12-06	31.05
2019-12-13	32.4
2019-12-20	18
2019-12-27	16.65
2020-01-03	25.44
2020-01-10	39.22
2020-01-17	38.69
2020-01-24	34.45
2020-01-31	31.27
2020-02-07	33.63
2020-02-14	38.76
2020-02-21	35.34
2020-02-28	37.05
2020-03-06	31.96
2020-03-13	25.84
2020-03-20	63.24
2020-03-27	49.64
2020-04-03	43.8
2020-04-10	26.4
2020-04-17	38.4
2020-04-24	41.4
2020-05-01	37.12
2020-05-08	48.72
2020-05-15	51.62
2020-05-22	41.18
2020-05-29	44.08
2020-06-05	59
2020-06-12	30.09
2020-06-19	25.96
2020-06-26	18.29
2020-07-03	25.2
2020-07-10	25.8
2020-07-17	23.1
2020-07-24	23.7
2020-07-31	21.3
2020-08-07	23.1
2020-08-14	23.45
2020-08-21	28
2020-08-28	26.25
2020-09-04	20.68
2020-09-11	25.38
2020-09-18	23.5
2020-09-25	30.08
2020-10-02	35.75
2020-10-09	33
2020-10-16	43.45
2020-10-23	42.35
2020-10-30	37.4
2020-11-06	45.6
2020-11-13	50.16
2020-11-20	46.74
2020-11-27	47.31
2020-12-04	34.76
2020-12-11	33.44
2020-12-18	25.08
2020-12-25	12.76
2021-01-01	10.26
2021-01-08	35.64
2021-01-15	38.88
2021-01-22	42.66
2021-01-29	39.42
2021-02-05	31.32
2021-02-12	31.9
2021-02-19	46.4
2021-02-26	43.5
2021-03-05	42.78
2021-03-12	37.95
2021-03-19	42.09
2021-03-26	42.78
2021-04-02	26.66
2021-04-09	39.68
2021-04-16	34.1
2021-04-23	49.6
2021-04-30	44.64
2021-05-07	41.4
2021-05-14	34.8
2021-05-21	43.2
2021-05-28	57.6
2021-06-04	50.7
2021-06-11	44.2
2021-06-18	31.2
2021-06-25	27.95
2021-07-02	29.6
2021-07-09	26.64
2021-07-16	31.45
2021-07-23	21.46
2021-07-30	28.12
2021-08-06	15.34
2021-08-13	25.37
2021-08-20	20.65
2021-08-27	17.7
2021-09-03	43.68
2021-09-10	37.96
2021-09-17	37.96
2021-09-24	43.68
2021-10-01	22.01
2021-10-08	20.59
2021-10-15	24.85
2021-10-22	37.63
2021-10-29	31.24
2021-11-05	56.58
2021-11-12	67.24
2021-11-19	43.46
2021-11-26	39.36
2021-12-03	38.54
2021-12-10	31.02
2021-12-17	30.08
2021-12-24	16.45
2021-12-31	10.34
2022-01-07	32.86
2022-01-14	31.8
2022-01-21	45.05
2022-01-28	43.46
2022-02-04	42
2022-02-11	41.25
2022-02-18	62.25
2022-02-25	54
2022-03-04	64.08
2022-03-11	58.74
2022-03-18	65.86
2022-03-25	61.41
